# Supplementary material for: Spliceosome component Usp39 contributes to hepatic lipid homeostasis through the regulation of lipophagy
Source: Research Square preprint supplement (doi:10.21203/rs.3.rs-2182223/v1), 2023-03-02
Supplement: Supplementary file 1 [file 3c168537b55f798d595c8a57.xlsx]

## Sheet: Abbreviation Correspondence
lipid abbreviation	Lipid name
AcCa	Acyl Carnitine
Cer	Ceramides
CerG1	Simple Glc series
CerG2	Simple Glc series
CerG2GNAc1	Simple Glc series
CL	Cardiolipin
Co	Coenzyme
DG	diglyceride
FA	Fatty Acid
GM2	Gangliosides
GM3	Gangliosides
LPC	lysophosphatidylcholine
LPE	lysophosphatidylethanolamine
LPG	lysophosphatidylglycerol
LPI	lysophosphatidylinositol
LPS	lysophosphatidylserine
MG	monoglyceride
MGDG	Monogalactosyldiacylglycerol
PA	phosphatidic acid
PC	phosphatidylcholine
PE	phosphatidylethanolamine
PG	phosphatidylglycerol
PI	phosphatidylinositol
PIP	phosphatidylinositol
PIP2	phosphatidylinositol
PS	phosphatidylserine
SM	sphingomyelin
So	Sphingoid base
SQDG	Sulfoquinovosyldiacylglycerol
TG	triglyceride
WE	wax exters

## Sheet:  Lipidomics HKO_vs_NC
name	DIFF	LipidIon	LipidGroup	Class	FattyAcid	FA1	FA2	FA3	FA4	IonFormula	CalMz	RT-(min)	QCRSD	Fold Change	P-value	VIP	A24-NC-5W-4h	A25-HKO-5W-4h	A28-HKO-5W-4h	A29-NC-5W-4h	A49-NC-5W-4h	A50-HKO-5W-4h	A71-HKO-5W-4h	A73-HKO-5W-4h	A74-NC-5W-4h	A75-NC-5W-4h	A908-NC-5W-4h	A910-HKO-5W-4h	QC-1	QC-2	QC-3
1019POS	Y	TG(18:0/18:1/22:6)+NH4	TG(58:7)+NH4	TG	(18:0/18:1/22:6)	(18:0)	(18:1)	(22:6)		C61 H108 O6 N1	950.817	21.0537	0.00988421	1.71005	0.0384956	1.14607	1109794350	1195191160	1997475623	7.07981e+08	1549419041	7.03263e+08	2024479085	2378122011	1053057564	6.08898e+08	7.74161e+08	1625451121	1066534888	1060399622	1046156611
1020POS	Y	TG(18:1/18:1/22:5)+NH4	TG(58:7)+NH4	TG	(18:1/18:1/22:5)	(18:1)	(18:1)	(22:5)		C61 H108 O6 N1	950.817	20.24	0.0244144	1.56639	0.0443658	1.33817	2256464309	3147802901	3416296673	1246790652	2487808635	1021056162	3156084246	2839728150	2044997011	1166340734	1920227680	3841419631	1923836243	1844706555	1844720442
109POS	Y	Cer(d18:1/18:0)+H	Cer(d36:1)+H	Cer	(d18:1/18:0)	(d18:1)	(18:0)			C36 H72 O3 N1	566.551	12.0414	0.0365953	3.74717	7.35149e-05	1.15139	1.01317e+08	3.76993e+08	6.25294e+08	9.1449e+07	2.58181e+08	3.7371e+08	5.87398e+08	6.54304e+08	9.45286e+07	9.04529e+07	1.8767e+08	4.68464e+08	2.08086e+08	2.08662e+08	1.95449e+08
111POS	Y	LPC(22:6)+H	LPC(22:6)+H	LPC	(22:6)	(22:6)				C30 H51 O7 N1 P1	568.34	2.23038	0.0129367	1.98577	0.0114764	1.87344	1098535979	1841958733	3503931946	8.38449e+08	2323208287	2730647641	1486285135	2643139340	1240251472	8.6946e+08	1641261699	3702377032	8.64853e+08	8.79991e+08	8.58066e+08
1145NEG	Y	LPE(16:0)-H	LPE(16:0)-H	LPE	(16:0)	(16:0)				C21 H43 O7 N1 P1	452.278	3.19848	0.0248593	1.25549	0.0422664	1.474	3.11294e+08	4.76322e+08	3.53194e+08	2.50358e+08	3.70048e+08	3.6639e+08	3.65108e+08	5.40043e+08	3.4831e+08	3.68833e+08	328871699	381949161	3.65474e+08	3.81697e+08	3.81655e+08
1168NEG	Y	LPE(22:6)-H	LPE(22:6)-H	LPE	(22:6)	(22:6)				C27 H43 O7 N1 P1	524.278	2.35919	0.0101218	1.604	0.00364041	1.96305	1.7423e+08	2.61819e+08	3.18159e+08	1.37176e+08	2.31668e+08	3.21319e+08	2.04237e+08	3.82767e+08	1.8656e+08	1.9115e+08	1.63164e+08	2.50357e+08	2.32326e+08	2.36087e+08	236730353
1172NEG	Y	Cer(d18:1/16:0)-H	Cer(d34:1)-H	Cer	(d18:1/16:0)	(d18:1)	(16:0)			C34 H66 O3 N1	536.505	11.764	0.0281641	2.40833	0.000606663	1.32352	2.95389e+07	9.50929e+07	9.62633e+07	1.96715e+07	3.45156e+07	5.35452e+07	7.19229e+07	6.41798e+07	3.10336e+07	3.06466e+07	3.32358e+07	4.92254e+07	4.90729e+07	51666354	5.14071e+07
1184NEG	Y	LPC(18:1)+HCOO	LPC(18:1)+HCOO	LPC	(18:1)	(18:1)				C27 H53 O9 N1 P1	566.346	3.00964	0.0103789	1.92986	0.000325511	1.43766	4.28622e+07	137828120	1.21795e+08	51705839	6.13199e+07	1.1104e+08	7.37931e+07	1.14231e+08	8.15826e+07	5.63982e+07	5.68154e+07	1.18083e+08	7.85261e+07	7.85497e+07	7.99581e+07
1193NEG	Y	Cer(d18:1/16:0)+HCOO	Cer(d34:1)+HCOO	Cer	(d18:1/16:0)	(d18:1)	(16:0)			C35 H68 O5 N1	582.51	11.764	0.023678	2.76057	0.000320692	5.71125	4.2166e+08	1597879982	1638701205	3.42792e+08	417042735	8.92509e+08	1243466000	1082449547	4.12843e+08	5.09202e+08	5.33211e+08	8.2394e+08	8.48395e+08	8.60395e+08	8.88344e+08
1196NEG	Y	LPC(20:4)+HCOO	LPC(20:4)+HCOO	LPC	(20:4)	(20:4)				C29 H51 O9 N1 P1	588.331	2.36547	0.0276055	1.34153	0.0258886	1.0677	1.13175e+08	1.56164e+08	1.73418e+08	8.8161e+07	1.36944e+08	1.88545e+08	9.28011e+07	1.58938e+08	1.26596e+08	1.08656e+08	1.13966e+08	1.52433e+08	1.31115e+08	1.31186e+08	1.37523e+08
1209NEG	Y	Cer(d18:1/18:0)+HCOO	Cer(d36:1)+HCOO	Cer	(d18:1/18:0)	(d18:1)	(18:0)			C37 H72 O5 N1	610.542	13.1821	0.034384	3.56437	1.28533e-05	3.88919	1.12487e+08	3.9446e+08	6.22841e+08	102508892	2.30305e+08	4.96443e+08	4.27493e+08	4.65986e+08	1.04266e+08	1.057e+08	1.24723e+08	3.72953e+08	3.21378e+08	3.4216e+08	3.40326e+08
1210NEG	Y	LPC(22:6)+HCOO	LPC(22:6)+HCOO	LPC	(22:6)	(22:6)				C31 H51 O9 N1 P1	612.331	2.26669	0.0137553	1.43327	0.0219351	1.15538	9.21806e+07	1.15465e+08	1.83517e+08	8.92981e+07	1.16903e+08	1.67131e+08	8.25414e+07	1.42486e+08	1.02128e+08	1.04045e+08	8.96029e+07	1.60446e+08	1.16656e+08	1.16643e+08	1.19451e+08
1228NEG	Y	Cer(d18:1/20:0)+HCOO	Cer(d38:1)+HCOO	Cer	(d18:1/20:0)	(d18:1)	(20:0)			C39 H76 O5 N1	638.573	14.7368	0.0210883	1.65158	0.0016734	1.67229	1.2297e+08	2.46108e+08	2.00479e+08	8.22054e+07	1.41199e+08	1.62951e+08	1.8966e+08	154647308	9.63534e+07	1.16259e+08	1.09549e+08	1.50293e+08	1.48292e+08	1.53603e+08	1.54055e+08
1232NEG	Y	Cer(d18:1/24:1)-H	Cer(d42:2)-H	Cer	(d18:1/24:1)	(d18:1)	(24:1)			C42 H80 O3 N1	646.614	16.2168	0.0126635	2.12123	0.000325879	1.47548	4.28246e+07	1.32685e+08	1.03065e+08	3.68312e+07	5.85047e+07	7.31672e+07	1.0267e+08	9.41812e+07	4.11602e+07	4.87748e+07	4.51215e+07	7.37874e+07	7.15435e+07	7.29075e+07	7.32928e+07
1252NEG	Y	Cer(d18:1/23:0)+HCOO	Cer(d41:1)+HCOO	Cer	(d18:1/23:0)	(d18:1)	(23:0)			C42 H82 O5 N1	680.62	17.1106	0.0173116	1.22713	0.015209	1.4494	4.31593e+08	455540544	4.51855e+08	2.67219e+08	366129939	4.30874e+08	4.37373e+08	4.55921e+08	412473331	3.85537e+08	400191004	5.45612e+08	4.20745e+08	4.33202e+08	4.33998e+08
1257NEG	Y	Cer(d18:2/24:2)+HCOO	Cer(d42:4)+HCOO	Cer	(d18:2/24:2)	(d18:2)	(24:2)			C43 H78 O5 N1	688.589	13.5161	0.0626425	3.13517	0.000725622	1.22455	1.30157e+07	8.69434e+07	4.00725e+07	1.21907e+07	2.50567e+07	3.98584e+07	5.03711e+07	5.91882e+07	1.41633e+07	1.86553e+07	1.9269e+07	4.44529e+07	3.57018e+07	4.00152e+07	3.97232e+07
1258NEG	Y	Cer(d18:1/24:2)+HCOO	Cer(d42:3)+HCOO	Cer	(d18:1/24:2)	(d18:1)	(24:2)			C43 H80 O5 N1	690.604	14.8563	0.0222912	2.68652	0.000153649	4.73894	2.56265e+08	1149689342	8.00461e+08	223251695	4.25546e+08	621673287	8.72546e+08	8.65176e+08	2.67903e+08	3.3176e+08	3.22176e+08	5.98469e+08	5.98394e+08	6.22337e+08	621872764
1259NEG	Y	Cer(d42:2)+HCOO	Cer(d42:2)+HCOO	Cer	(d18:2/24:0)	(d18:2)	(24:0)			C43 H82 O5 N1	692.62	16.5182	0.0325837	1.5608	0.0138547	1.93329	2.0809e+08	4.79972e+08	3.14531e+08	1.65413e+08	2.08384e+08	2.53293e+08	2.67143e+08	2.67002e+08	1.70546e+08	2.3997e+08	1.92153e+08	2.66917e+08	2.47671e+08	2.62786e+08	2.61518e+08
1260NEG	Y	Cer(d18:1/24:1)+HCOO	Cer(d42:2)+HCOO	Cer	(d18:1/24:1)	(d18:1)	(24:1)			C43 H82 O5 N1	692.62	16.2168	0.0145431	2.1069	0.000356512	8.02711	1296327899	3880658803	3205230037	1092994419	1745264633	2132727416	2985150353	2785573914	1188071050	1445007399	1382716862	2182683217	2128600172	2184917998	2181151870
1280NEG	Y	PE(16:0/18:1)-H	PE(34:1)-H	PE	(16:0/18:1)	(16:0)	(18:1)			C39 H75 O8 N1 P1	716.524	11.883	0.00733372	1.95192	0.00490521	2.59925	1.78927e+08	6.06107e+08	3.00482e+08	2.06763e+08	1.9459e+08	2.34574e+08	3.60893e+08	4.32331e+08	1.96407e+08	2.11683e+08	1.96758e+08	3.78886e+08	2.92044e+08	2.95187e+08	2.96181e+08
1287NEG	Y	PE(16:0p/20:4)-H	PE(36:4p)-H	PE	(16:0p/20:4)	(16:0p)	(20:4)			C41 H73 O7 N1 P1	722.513	11.306	0.00809984	1.37305	0.00874138	2.65749	5.88811e+08	9.33718e+08	8.28493e+08	4.84218e+08	5.62235e+08	5.45813e+08	9.02213e+08	7.09206e+08	5.3448e+08	584639397	5.78986e+08	6.57429e+08	6.54838e+08	6.64139e+08	6.64083e+08
1300NEG	Y	PE(16:0/20:5)-H	PE(36:5)-H	PE	(16:0/20:5)	(16:0)	(20:5)			C41 H71 O8 N1 P1	736.492	9.55866	0.00971536	0.677192	0.00680339	1.63129	1.84131e+08	1.65218e+08	7.83225e+07	1.50082e+08	229117231	1.25361e+08	1.42919e+08	1.03756e+08	1.78698e+08	1.69242e+08	2.17971e+08	1.49137e+08	1.50702e+08	1.53609e+08	1.51703e+08
1302NEG	Y	PE(16:0/20:5)-H	PE(36:5)-H	PE	(16:0/20:5)	(16:0)	(20:5)			C41 H71 O8 N1 P1	736.492	9.86908	0.0412316	0.574577	8.12696e-05	1.7109	1.59123e+08	8.06226e+07	5.27852e+07	1.18242e+08	1.43674e+08	9.59364e+07	9.35621e+07	7.42978e+07	1.27157e+08	1.40973e+08	1.58984e+08	9.01248e+07	1.07522e+08	1.15429e+08	1.076e+08
1309NEG	Y	PE(18:0/18:1)-H	PE(36:1)-H	PE	(18:0/18:1)	(18:0)	(18:1)			C41 H79 O8 N1 P1	744.555	13.237	0.0155113	2.14252	0.00147732	2.70876	1.42719e+08	4.93291e+08	2.52587e+08	1.55093e+08	2.00824e+08	2.07885e+08	3.74427e+08	3.9627e+08	1.63732e+08	1.64702e+08	158014282	3.86105e+08	2.61379e+08	2.68505e+08	2.61459e+08
1312NEG	Y	PG(16:0/18:2)-H	PG(34:2)-H	PG	(16:0/18:2)	(16:0)	(18:2)			C40 H74 O10 N0 P1	745.503	9.63671	0.0127101	0.548286	0.000132415	1.65898	1.28611e+08	6.11978e+07	6.77784e+07	1.10307e+08	125334969	7.2187e+07	6.53532e+07	7.4377e+07	1.07724e+08	1.58131e+08	1.56619e+08	9.04588e+07	9.44683e+07	9.6576e+07	9.44931e+07
1315NEG	Y	PE(16:0p/22:6)-H	PE(38:6p)-H	PE	(16:0p/22:6)	(16:0p)	(22:6)			C43 H73 O7 N1 P1	746.513	10.942	0.057784	1.44955	0.00105547	1.7106	2.11698e+08	3.4195e+08	3.61879e+08	2.61244e+08	1.97322e+08	2.60267e+08	2.71852e+08	3.06652e+08	1.97971e+08	2.04471e+08	1.78661e+08	2.71319e+08	2.45844e+08	2.72388e+08	2.72024e+08
1319NEG	Y	SM(d16:1/18:0)+HCOO	SM(d34:1)+HCOO	SM	(d16:1/18:0)	(d16:1)	(18:0)			C40 H80 O8 N2 P1	747.566	10.238	0.0121588	1.30606	0.0136788	1.95582	3.41099e+08	5.34713e+08	6.00657e+08	3.41221e+08	385777418	3.48424e+08	4.78987e+08	4.80145e+08	3.66741e+08	3.57654e+08	4.59002e+08	497663720	3.91349e+08	3.99707e+08	3.99709e+08
1321NEG	Y	PE(18:1p/20:4)-H	PE(38:5p)-H	PE	(18:1p/20:4)	(18:1p)	(20:4)			C43 H75 O7 N1 P1	748.529	11.364	0.0066869	1.52228	0.00759805	2.17979	2.19848e+08	4.58319e+08	3.89533e+08	2.21223e+08	2.53724e+08	2.15026e+08	4.36756e+08	3.53136e+08	2.23862e+08	2.38148e+08	2.66448e+08	3.13812e+08	2.98852e+08	3.02669e+08	2.99675e+08
1325NEG	Y	PE(38:4p)-H	PE(38:4p)-H	PE	(38:4p)	(38:4p)				C43 H77 O7 N1 P1	750.544	12.06	0.0059571	1.80014	0.00880976	1.81513	1.09122e+08	3.12098e+08	1.79199e+08	1.09696e+08	1.0888e+08	1.18697e+08	2.39324e+08	2.09487e+08	1.09949e+08	1.14556e+08	123590050	1.57715e+08	1.65554e+08	1.67066e+08	1.67426e+08
1345NEG	Y	PE(18:1/20:5)-H	PE(38:6)-H	PE	(18:1/20:5)	(18:1)	(20:5)			C43 H73 O8 N1 P1	762.508	9.96015	0.0201261	0.640488	0.0208476	1.40879	1.18284e+08	1.40661e+08	4.15997e+07	9.00292e+07	1.28894e+08	1.00883e+08	7.98683e+07	6.89179e+07	1.62994e+08	1.51707e+08	1.56765e+08	8.60166e+07	1.00012e+08	1.03554e+08	1.0004e+08
1350NEG	Y	PC(16:0e/16:0)+HCOO	PC(32:0e)+HCOO	PC	(16:0e/16:0)	(16:0e)	(16:0)			C41 H83 O9 N1 P1	764.581	12.249	0.00638707	1.88828	0.00770404	1.15757	3.531e+07	1.08722e+08	7.41444e+07	3.46417e+07	3.99753e+07	3.9039e+07	9.60886e+07	7.35127e+07	3.89399e+07	4.51767e+07	4.27327e+07	5.55923e+07	5.70191e+07	5.7023e+07	5.76541e+07
1351NEG	Y	PE(18:0/20:4)-H	PE(38:4)-H	PE	(18:0/20:4)	(18:0)	(20:4)			C43 H77 O8 N1 P1	766.539	11.963	0.0113125	0.859523	0.0278558	7.1886	7026232055	5415114501	5791738704	6910936624	8548494140	7072819784	6732120406	5563988083	7167826091	6854571603	7060517850	6872434243	6976455902	6980478094	7116056969
1361NEG	Y	PG(18:1/18:2)-H	PG(36:3)-H	PG	(18:1/18:2)	(18:1)	(18:2)			C42 H76 O10 N0 P1	771.518	8.97708	0.0122978	4.24645	0.00233257	1.96115	2.80302e+07	1.21833e+08	1.07686e+08	1.62595e+07	3.26955e+07	3.96173e+07	1.42409e+08	1.2645e+08	2.98144e+07	3.23943e+07	3.9097e+07	2.19109e+08	7.30816e+07	7.47046e+07	7.31958e+07
1362NEG	Y	PE(18:1p/22:6)-H	PE(40:7p)-H	PE	(18:1p/22:6)	(18:1p)	(22:6)			C45 H75 O7 N1 P1	772.529	11.022	0.0141092	1.55823	0.00112952	1.0705	4.57032e+07	9.99835e+07	9.96258e+07	5.9465e+07	5.62004e+07	6.27795e+07	8.08186e+07	8.99593e+07	5.20652e+07	5.85315e+07	5.08718e+07	6.98877e+07	7.05255e+07	7.05401e+07	7.22706e+07
1367NEG	Y	PG(18:1/18:1)-H	PG(36:2)-H	PG	(18:1/18:1)	(18:1)	(18:1)			C42 H78 O10 N0 P1	773.534	9.788	0.0132388	3.04483	0.00204188	1.68735	3.54727e+07	1.24733e+08	8.66429e+07	2.36707e+07	3.80878e+07	3.58125e+07	1.219e+08	107880424	3.42395e+07	3.76334e+07	3.98595e+07	1.5929e+08	6.98775e+07	7.17204e+07	7.05137e+07
1368NEG	Y	PC(14:0/18:2)+HCOO	PC(32:2)+HCOO	PC	(14:0/18:2)	(14:0)	(18:2)			C41 H77 O10 N1 P1	774.529	9.316	0.00844342	1.34873	0.0267079	1.02806	72172977	1.39817e+08	1.16494e+08	7.38836e+07	1.0912e+08	1.01229e+08	1.55935e+08	149901685	1.20288e+08	118398055	1.20289e+08	1.64944e+08	1.13716e+08	1.15408e+08	1.15382e+08
1372NEG	Y	SM(d18:0/18:1)+HCOO	SM(d36:1)+HCOO	SM	(d18:0/18:1)	(d18:0)	(18:1)			C42 H84 O8 N2 P1	775.597	11.493	0.00490395	1.53316	0.00397249	1.13756	5.63271e+07	7.21389e+07	1.00051e+08	6.29164e+07	9.29498e+07	1.0307e+08	8.60738e+07	1.0204e+08	4.97393e+07	4.3161e+07	6.56625e+07	1.05055e+08	7.84113e+07	7.88996e+07	7.91745e+07
1374NEG	Y	PC(16:0/16:1)+HCOO	PC(32:1)+HCOO	PC	(16:0/16:1)	(16:0)	(16:1)			C41 H79 O10 N1 P1	776.545	10.3236	0.00609271	1.45382	0.00540319	1.70879	1.97131e+08	3.75252e+08	2.45106e+08	2.08641e+08	2.17021e+08	2.37465e+08	3.45556e+08	274601643	1.76255e+08	1.90822e+08	1.89846e+08	2.3711e+08	2.37563e+08	2.37584e+08	2.40089e+08
1376NEG	Y	PE(18:0p/22:5)-H	PE(40:5p)-H	PE	(18:0p/22:5)	(18:0p)	(22:5)			C45 H79 O7 N1 P1	776.56	12.415	0.0177047	0.65798	0.031049	1.2743	7.94958e+07	9.75699e+07	7.04409e+07	7.46713e+07	1.67456e+08	5.74384e+07	9.70953e+07	8.77363e+07	1.3747e+08	1.47707e+08	1.47002e+08	8.57059e+07	7.7822e+07	8.02558e+07	8.02608e+07
1378NEG	Y	PC(16:0/16:0)+HCOO	PC(32:0)+HCOO	PC	(16:0/16:0)	(16:0)	(16:0)			C41 H81 O10 N1 P1	778.56	11.422	0.00665183	1.52254	0.00208193	3.76128	6.87339e+08	1298783250	1170438558	6.3281e+08	7.20005e+08	6.76429e+08	1122249838	1133646213	7.22359e+08	7.38528e+08	6.99994e+08	9.94693e+08	8.75025e+08	8.75377e+08	8.85319e+08
1395NEG	Y	PE(18:2/22:6)-H	PE(40:8)-H	PE	(18:2/22:6)	(18:2)	(22:6)			C45 H73 O8 N1 P1	786.508	9.455	0.0142429	0.728247	0.00079082	1.46225	146276934	1.01533e+08	9.2672e+07	149116217	1.66869e+08	1.28494e+08	1.12374e+08	1.20151e+08	1.46608e+08	1.79346e+08	1.67209e+08	1.40561e+08	1.34308e+08	1.37679e+08	1.37675e+08
1407NEG	Y	PE(18:0/22:6)-H	PE(40:6)-H	PE	(18:0/22:6)	(18:0)	(22:6)			C45 H77 O8 N1 P1	790.539	11.598	0.0239341	1.11826	0.0304986	3.08876	3470391936	3506669467	4171088049	3668571858	4190915101	4208938382	4021656769	4158818921	3296999289	3422377976	3469807539	3996644294	3819029263	3982486704	3981199639
1408NEG	Y	PE(18:0/22:6)-H	PE(40:6)-H	PE	(18:0/22:6)	(18:0)	(22:6)			C45 H77 O8 N1 P1	790.539	11.331	0.0103341	1.70901	0.0116845	1.41094	7.44268e+07	2.08935e+08	1.04581e+08	7.16847e+07	9.50961e+07	9.71847e+07	1.13245e+08	1.69055e+08	7.63369e+07	7.48028e+07	8.39241e+07	1.20951e+08	1.04389e+08	1.06297e+08	1.06263e+08
1409NEG	Y	PC(18:0p/16:0)+HCOO	PC(34:0p)+HCOO	PC	(18:0p/16:0)	(18:0p)	(16:0)			C43 H85 O9 N1 P1	790.597	12.2998	0.00450905	1.7936	0.0148732	1.30123	4.70935e+07	1.59678e+08	9.8557e+07	4.78285e+07	6.19971e+07	5.10398e+07	1.18689e+08	9.31522e+07	5.50768e+07	6.27466e+07	6.21123e+07	8.30689e+07	7.98989e+07	8.05305e+07	7.99108e+07
1413NEG	Y	PE(18:0/22:5)-H	PE(40:5)-H	PE	(18:0/22:5)	(18:0)	(22:5)			C45 H79 O8 N1 P1	792.555	11.983	0.00967279	1.23242	0.0146493	1.11927	216831433	2.69041e+08	1.89366e+08	1.67535e+08	204671276	2.04186e+08	2.40359e+08	2.40678e+08	1.79505e+08	1.83396e+08	1.91567e+08	2.65651e+08	2.13182e+08	2.09603e+08	2.13126e+08
1414NEG	Y	PE(18:0/22:5)-H	PE(40:5)-H	PE	(18:0/22:5)	(18:0)	(22:5)			C45 H79 O8 N1 P1	792.555	12.453	0.00814471	2.14313	0.0108369	2.43669	1.13389e+08	3.93157e+08	198348970	1.44858e+08	1.99247e+08	1.72561e+08	311720293	494264245	1.19105e+08	1.18526e+08	1.54914e+08	2.51695e+08	2.29518e+08	2.32787e+08	2.29549e+08
1416NEG	Y	PG(18:2/20:4)-H	PG(38:6)-H	PG	(18:2/20:4)	(18:2)	(20:4)			C44 H74 O10 N0 P1	793.503	7.65802	0.0120105	7.26762	5.0942e-05	1.35509	5.39524e+06	4.70583e+07	5.38412e+07	4.0357e+06	7.36672e+06	1.82017e+07	5.3605e+07	5.74385e+07	7.22205e+06	7.44764e+06	7.8784e+06	5.58054e+07	2.45731e+07	2.50963e+07	2.50866e+07
141POS	Y	DG(16:0/18:2)+NH4	DG(34:2)+NH4	DG	(16:0/18:2)	(16:0)	(18:2)			C37 H72 O5 N1	610.541	11.9541	0.0305424	1.58919	0.0400273	1.53652	1145752122	1137913681	2769138460	1006178307	2628438305	3045406730	2808989238	2433051324	1430642106	1045165136	2106682554	2684836142	1162876363	1166150155	1104042022
1420NEG	Y	PE(18:0/22:4)-H	PE(40:4)-H	PE	(18:0/22:4)	(18:0)	(22:4)			C45 H81 O8 N1 P1	794.571	12.881	0.00731457	1.41177	0.032174	1.59141	1.29342e+08	3.10017e+08	1.951e+08	1.44842e+08	2.07377e+08	1.51253e+08	2.68653e+08	2.74708e+08	1.55092e+08	1.6847e+08	1.83711e+08	1.96275e+08	2.01618e+08	2.04334e+08	2.04028e+08
1423NEG	Y	PG(18:1/20:4)-H	PG(38:5)-H	PG	(18:1/20:4)	(18:1)	(20:4)			C44 H76 O10 N0 P1	795.518	8.49519	0.00827092	4.88038	0.000161908	1.35334	9.3139e+06	5.67034e+07	6.6586e+07	7.2338e+06	1.1267e+07	1.7955e+07	6.02471e+07	5.73603e+07	1.14563e+07	1.29057e+07	1.24729e+07	5.66627e+07	2.94477e+07	2.98352e+07	2.99036e+07
1426NEG	Y	PG(18:0/20:4)-H	PG(38:4)-H	PG	(18:0/20:4)	(18:0)	(20:4)			C44 H78 O10 N0 P1	797.534	9.19129	0.0300843	3.7385	0.000229668	1.03636	8.59152e+06	4.7748e+07	3.51765e+07	7.0461e+06	1.08156e+07	1.4713e+07	3.45371e+07	3.37889e+07	9.1807e+06	9.50531e+06	9.94678e+06	3.99756e+07	2.23408e+07	2.24247e+07	2.35674e+07
1432NEG	Y	PC(16:0/18:3)+HCOO	PC(34:3)+HCOO	PC	(16:0/18:3)	(16:0)	(18:3)			C43 H79 O10 N1 P1	800.545	9.933	0.00543505	1.2514	0.0162835	1.38578	2.08174e+08	291544814	2.43177e+08	1.95615e+08	2.80403e+08	2.67223e+08	3.58761e+08	2.94877e+08	2.38118e+08	2.20513e+08	2.54467e+08	2.92983e+08	2.56356e+08	2.58782e+08	258786405
1441NEG	Y	SM(d38:1)+HCOO	SM(d38:1)+HCOO	SM	(d38:1)	(d38:1)				C44 H88 O8 N2 P1	803.628	12.846	0.00486262	0.81827	0.00760108	1.06912	1.32827e+08	9.84711e+07	8.00955e+07	1.11489e+08	1.25395e+08	1.01754e+08	9.25372e+07	9.45876e+07	1.12454e+08	116877581	121323364	1.22008e+08	1.05735e+08	1.06043e+08	1.06742e+08
1459NEG	Y	PS(18:0/20:4)-H	PS(38:4)-H	PS	(18:0/20:4)	(18:0)	(20:4)			C44 H77 O10 N1 P1	810.529	11.4478	0.0237629	0.504423	0.00050599	1.65157	1.36328e+08	4.23944e+07	3.69822e+07	9.82298e+07	1.20361e+08	6.27205e+07	9.92663e+07	5.34812e+07	9.70657e+07	1.38842e+08	1.26704e+08	6.70937e+07	1.0172e+08	9.75464e+07	1.01628e+08
1460NEG	Y	PS(38:3)-H	PS(38:3)-H	PS	(38:3)	(38:3)				C44 H79 O10 N1 P1	812.545	13.25	0.0077024	1.88916	0.00237682	1.03486	2.92894e+07	8.85675e+07	4.50789e+07	2.98131e+07	3.85843e+07	4.08473e+07	6.20192e+07	6.37097e+07	3.10488e+07	3.15449e+07	3.11501e+07	6.14198e+07	4.72894e+07	4.79292e+07	4.79226e+07
1462NEG	Y	PC(16:0e/20:4)+HCOO	PC(36:4e)+HCOO	PC	(16:0e/20:4)	(16:0e)	(20:4)			C45 H83 O9 N1 P1	812.581	11.118	0.00982962	1.63192	0.00397893	1.04227	3.90022e+07	9.08031e+07	7.5323e+07	3.31325e+07	4.69631e+07	4.31647e+07	7.78767e+07	7.10192e+07	4.31897e+07	4.46124e+07	4.75741e+07	5.70952e+07	5.47802e+07	5.481e+07	5.5733e+07
1470NEG	Y	PC(17:0/18:2)+HCOO	PC(35:2)+HCOO	PC	(17:0/18:2)	(17:0)	(18:2)			C44 H83 O10 N1 P1	816.576	11.012	0.00857168	0.812791	0.00943526	1.00576	9.41849e+07	9.79442e+07	8.14241e+07	1.08875e+08	1.27116e+08	9.6313e+07	8.95577e+07	1.07983e+08	115756459	1.27987e+08	1.30819e+08	9.95827e+07	9.85235e+07	9.85612e+07	1.00012e+08
1473NEG	Y	PG(18:2/22:6)-H	PG(40:8)-H	PG	(18:2/22:6)	(18:2)	(22:6)			C46 H74 O10 N0 P1	817.503	7.38275	0.00885932	3.21322	0.00068885	2.06498	3.61123e+07	1.20807e+08	1.49402e+08	2.71219e+07	5.68601e+07	6.63531e+07	1.74609e+08	152794577	4.61238e+07	4.88093e+07	5.77709e+07	2.12594e+08	8.84426e+07	8.98134e+07	8.98141e+07
1480NEG	Y	PG(18:1/22:6)-H	PG(40:7)-H	PG	(18:1/22:6)	(18:1)	(22:6)			C46 H76 O10 N0 P1	819.518	8.21053	0.010882	2.68074	0.000381171	1.95758	5.13876e+07	1.55739e+08	1.34017e+08	3.73663e+07	6.46656e+07	6.57257e+07	1.69809e+08	1.49574e+08	5.57389e+07	5.34231e+07	5.623e+07	1.79784e+08	9.24005e+07	9.41766e+07	9.41517e+07
1488NEG	Y	PG(18:1/22:5)-H	PG(40:6)-H	PG	(18:1/22:5)	(18:1)	(22:5)			C46 H78 O10 N0 P1	821.534	9.14335	0.02444	4.33071	0.00122832	1.3659	1.09876e+07	8.83262e+07	5.37759e+07	8.38123e+06	1.91633e+07	2.38916e+07	5.97785e+07	7.65548e+07	1.44625e+07	1.27371e+07	1.29626e+07	3.8475e+07	3.58127e+07	3.74196e+07	3.73211e+07
1494NEG	Y	PC(16:1/20:4)+HCOO	PC(36:5)+HCOO	PC	(16:1/20:4)	(16:1)	(20:4)			C45 H79 O10 N1 P1	824.545	9.5375	0.00670806	0.634127	8.88544e-06	1.88578	2.1369e+08	1.23541e+08	1.12541e+08	184051515	1.837e+08	1.50354e+08	1.21708e+08	1.11598e+08	1.86977e+08	1.83857e+08	2.16376e+08	121329856	1.51132e+08	1.53116e+08	1.51716e+08
1498NEG	Y	PS(39:3)-H	PS(39:3)-H	PS	(39:3)	(39:3)				C45 H81 O10 N1 P1	826.56	9.955	0.00645459	0.748749	0.002932	2.05352	3.2485e+08	2.48968e+08	2.35629e+08	2.92858e+08	3.44246e+08	3.06613e+08	2.6758e+08	2.45266e+08	3.65075e+08	3.98503e+08	4.21254e+08	3.03347e+08	2.99214e+08	3.02599e+08	3.0257e+08
1500NEG	Y	PC(16:0/20:3)+HCOO	PC(36:3)+HCOO	PC	(16:0/20:3)	(16:0)	(20:3)			C45 H83 O10 N1 P1	828.576	10.894	0.0268027	0.737439	0.0445943	3.03454	1029628422	7.8721e+08	5.20368e+08	1337829442	8.77708e+08	7.6335e+08	5.65266e+08	6.52609e+08	7.5732e+08	7.74568e+08	7.53812e+08	7.89872e+08	7.59667e+08	7.60445e+08	7.95889e+08
1506NEG	Y	PC(18:1/18:1)+HCOO	PC(36:2)+HCOO	PC	(18:1/18:1)	(18:1)	(18:1)			C45 H85 O10 N1 P1	830.592	11.799	0.00944268	0.851355	0.0306783	5.31969	3757222270	2881334547	3204591895	3765135466	4674865319	4087807050	3761169605	3321310126	3711544289	4148539203	4437933373	3597926540	3702945909	3705990525	3765330251
1509NEG	Y	SM(d40:1)+HCOO	SM(d40:1)+HCOO	SM	(d40:1)	(d40:1)				C46 H92 O8 N2 P1	831.66	14.319	0.00405414	0.573514	6.07612e-05	4.32141	858267144	4.1985e+08	3.98332e+08	8.56181e+08	8.04969e+08	5.63757e+08	4.67108e+08	5.02711e+08	8.31307e+08	1067832259	8.5665e+08	6.73649e+08	6.68461e+08	6.73194e+08	6.73161e+08
1516NEG	Y	PS(18:0/22:6)-H	PS(40:6)-H	PS	(18:0/22:6)	(18:0)	(22:6)			C46 H77 O10 N1 P1	834.529	10.275	0.00994622	1.38143	0.0235949	1.32251	160344960	1.91517e+08	2.82674e+08	168150433	1.71172e+08	1.56505e+08	2.79507e+08	1.83202e+08	1.20957e+08	1.63851e+08	170845187	2.263e+08	2.09218e+08	2.05595e+08	2.09137e+08
1518NEG	Y	PI(34:1)-H	PI(34:1)-H	PI	(34:1)	(34:1)				C43 H80 O13 N0 P1	835.534	10.1327	0.0172466	1.49254	0.00532035	1.40992	1.03038e+08	1.71535e+08	209093954	1.27728e+08	1.18066e+08	1.19279e+08	2.30475e+08	1.62884e+08	1.06955e+08	1.25739e+08	1.30557e+08	1.69547e+08	1.54239e+08	1.58941e+08	1.58939e+08
1524NEG	Y	PC(18:0p/20:4)+HCOO	PC(38:4p)+HCOO	PC	(18:0p/20:4)	(18:0p)	(20:4)			C47 H85 O9 N1 P1	838.597	11.166	0.0147297	1.58019	0.0152329	1.00954	3.99879e+07	1.00745e+08	7.67578e+07	3.21776e+07	4.79363e+07	4.09898e+07	8.00941e+07	6.92087e+07	4.38601e+07	5.2081e+07	5.36416e+07	5.83568e+07	5.69338e+07	5.69575e+07	5.84108e+07
1530NEG	Y	PG(20:4/22:6)-H	PG(42:10)-H	PG	(20:4/22:6)	(20:4)	(22:6)			C48 H74 O10 N0 P1	841.503	7.18582	0.0110528	3.98253	0.000232372	1.24177	8.77645e+06	4.46589e+07	6.41922e+07	8.11244e+06	1.53188e+07	2.00899e+07	5.37808e+07	5.59718e+07	1.26916e+07	1.37197e+07	1.24211e+07	4.42257e+07	2.66697e+07	2.71205e+07	2.7234e+07
1541NEG	Y	SM(d41:1)+HCOO	SM(d41:1)+HCOO	SM	(d41:1)	(d41:1)				C47 H94 O8 N2 P1	845.675	15.092	0.003936	0.66541	0.00954429	2.17445	3.62909e+08	1.62066e+08	1.62212e+08	2.52813e+08	2.71305e+08	2.07844e+08	1.53753e+08	227978341	3.58444e+08	3.13057e+08	3.07212e+08	327630282	2.49386e+08	2.5131e+08	2.5072e+08
1550NEG	Y	PC(16:0/22:6)+HCOO	PC(38:6)+HCOO	PC	(16:0/22:6)	(16:0)	(22:6)			C47 H81 O10 N1 P1	850.56	9.64842	0.00840987	0.684167	0.000138612	1.93658	2.54949e+08	1.69467e+08	1.53909e+08	1.86626e+08	2.41094e+08	1.82058e+08	1.64927e+08	1.55198e+08	230771705	2.70868e+08	2.49668e+08	1.5552e+08	1.9201e+08	1.94845e+08	1.94824e+08
1560NEG	Y	SM(d22:2/20:1)+HCOO	SM(d42:3)+HCOO	SM	(d22:2/20:1)	(d22:2)	(20:1)			C48 H92 O8 N2 P1	855.66	12.951	0.00504265	1.38217	0.0150582	1.48224	1.29178e+08	2.54964e+08	1.74952e+08	1.32833e+08	230051088	1.85802e+08	2.23186e+08	2.57337e+08	1.51572e+08	1.57189e+08	173640347	2.50634e+08	1.94238e+08	1.95942e+08	1.94243e+08
1569NEG	Y	PI(16:0/20:3)-H	PI(36:3)-H	PI	(16:0/20:3)	(16:0)	(20:3)			C45 H80 O13 N0 P1	859.534	9.67169	0.0330874	0.651952	0.0279248	1.04719	9.43326e+07	7.41619e+07	3.18887e+07	1.16404e+08	6.39125e+07	4.28009e+07	5.69994e+07	4.14414e+07	6.15941e+07	7.21065e+07	7.66659e+07	6.89147e+07	8.65508e+07	8.18849e+07	8.16686e+07
1571NEG	Y	SM(d42:1)+HCOO	SM(d42:1)+HCOO	SM	(d42:1)	(d42:1)				C48 H96 O8 N2 P1	859.691	15.864	0.00550823	0.614147	3.11637e-05	3.76013	6.43812e+08	3.80406e+08	3.97355e+08	7.24201e+08	6.86248e+08	4.73124e+08	4.74948e+08	4.47713e+08	7.75044e+08	8.65694e+08	7.36179e+08	5.47848e+08	5.80491e+08	5.85984e+08	5.86141e+08
1583NEG	Y	PG(22:6/22:6)-H	PG(44:12)-H	PG	(22:6/22:6)	(22:6)	(22:6)			C50 H74 O10 N0 P1	865.503	6.93261	0.0108807	1.53452	0.0213102	1.43628	9.48509e+07	1.80073e+08	2.55308e+08	7.40657e+07	1.46878e+08	132704448	177376190	1.44975e+08	107276380	1.33658e+08	1.10299e+08	1.33133e+08	1.32744e+08	1.32916e+08	1.35345e+08
1589NEG	Y	PG(22:5/22:6)-H	PG(44:11)-H	PG	(22:5/22:6)	(22:5)	(22:6)			C50 H76 O10 N0 P1	867.518	7.64375	0.0194794	3.91453	0.000480848	1.11611	7.2153e+06	5.20754e+07	3.8106e+07	6.69344e+06	1.48646e+07	2.48092e+07	4.05286e+07	5.54647e+07	9.92938e+06	1.04923e+07	1.03516e+07	2.2113e+07	2.30355e+07	2.38587e+07	2.37991e+07
1599NEG	Y	PC(18:2/22:6)+HCOO	PC(40:8)+HCOO	PC	(18:2/22:6)	(18:2)	(22:6)			C49 H81 O10 N1 P1	874.56	8.89395	0.0085257	0.848153	0.00272414	1.05289	1.5178e+08	1.12093e+08	1.37633e+08	1.34066e+08	156730677	1.20062e+08	1.2221e+08	1.32796e+08	1.46912e+08	1.61987e+08	1.44261e+08	1.34927e+08	1.29088e+08	1.305e+08	1.31279e+08
1605NEG	Y	PC(18:0/22:5)+HCOO	PC(40:5)+HCOO	PC	(18:0/22:5)	(18:0)	(22:5)			C49 H87 O10 N1 P1	880.607	12.077	0.0108606	1.74892	0.00361421	1.15431	3.68087e+07	9.63488e+07	7.40364e+07	5.03224e+07	6.0711e+07	5.63618e+07	7.17544e+07	1.1151e+08	3.59905e+07	4.05456e+07	5.0585e+07	7.08782e+07	6.27749e+07	6.39353e+07	6.40033e+07
163POS	Y	DG(18:2/18:2)+NH4	DG(36:4)+NH4	DG	(18:2/18:2)	(18:2)	(18:2)			C39 H72 O5 N1	634.541	11.1704	0.0220972	2.13314	0.00833095	1.67604	7.99448e+08	7.9877e+08	1574594788	4.95847e+08	8.65255e+08	2601689644	1513671300	1242326470	8.70579e+08	5.25601e+08	9.03244e+08	1782678550	876967496	8.77981e+08	8.44325e+08
167POS	Y	DG(18:1/18:2)+NH4	DG(36:3)+NH4	DG	(18:1/18:2)	(18:1)	(18:2)			C39 H74 O5 N1	636.556	12.0068	0.0171768	2.21915	0.00273708	2.68809	1802140992	2190610909	4410461791	1171381578	2878924817	5424103048	4004387503	3304812035	1769862238	1113006910	2337658983	5238198437	1706242861	1682832021	1648874487
1682NEG	Y	CL(18:2/18:2/18:2/18:2)-H	CL(72:8)-H	CL	(18:2/18:2/18:2/18:2)	(18:2)	(18:2)	(18:2)	(18:2)	C81 H141 O17 P2	1447.96	19.221	0.0136762	0.545735	0.00145455	3.22501	4.00641e+08	1.40497e+08	2.92199e+08	4.72305e+08	6.19428e+08	3.52524e+08	3.16882e+08	2.89839e+08	4.82088e+08	6.73061e+08	6.32841e+08	3.9827e+08	4.26518e+08	4.26634e+08	4.16551e+08
1689NEG	Y	CL(20:5/18:2/18:2/18:2)-H	CL(74:11)-H	CL	(20:5/18:2/18:2/18:2)	(20:5)	(18:2)	(18:2)	(18:2)	C83 H139 O17 P2	1469.95	19.229	0.00653451	0.634734	0.00109575	1.25409	8.37148e+07	3.25787e+07	5.92053e+07	9.35466e+07	1.04501e+08	7.06738e+07	6.78967e+07	5.79162e+07	8.43238e+07	1.06113e+08	1.0514e+08	7.81854e+07	8.16736e+07	8.26027e+07	8.16761e+07
182POS	Y	Cer(d18:2/24:1)+H	Cer(d42:3)+H	Cer	(d18:2/24:1)	(d18:2)	(24:1)			C42 H80 O3 N1	646.613	13.2412	0.0172111	3.5365	0.00017702	1.8775	3.31092e+08	1703028630	1753876824	1.98277e+08	7.13461e+08	7.40229e+08	1569633469	1634674884	3.029e+08	310410119	5.82507e+08	1222822450	4.61435e+08	4.55438e+08	445930111
183POS	Y	Cer(d18:1/24:1)+H	Cer(d42:2)+H	Cer	(d18:1/24:1)	(d18:1)	(24:1)			C42 H82 O3 N1	648.629	14.3011	0.0170601	2.66246	0.000455868	3.35449	1929649396	6691985115	7410856063	1139577775	3451566173	3189711132	6029729797	5632266844	1768695756	1749091371	2684690776	4920605005	1939792382	1938604130	1882465233
194POS	Y	DG(16:0/22:6)+NH4	DG(38:6)+NH4	DG	(16:0/22:6)	(16:0)	(22:6)			C41 H72 O5 N1	658.541	11.3562	0.0626762	2.1055	0.00472178	1.41435	4.98632e+08	6.1444e+08	1497390518	4.37216e+08	1154850597	1386210668	1236920177	1717064686	5.13407e+08	4.51452e+08	7.10446e+08	1477285478	5.35598e+08	5.37097e+08	4.8017e+08
198POS	Y	DG(18:1/20:4)+NH4	DG(38:5)+NH4	DG	(18:1/20:4)	(18:1)	(20:4)			C41 H74 O5 N1	660.556	11.7282	0.0318504	2.29463	0.00432988	1.10957	2.92173e+08	3.49166e+08	6.85831e+08	1.74518e+08	421394253	1035069137	5.22209e+08	6.0504e+08	2.71848e+08	2.11046e+08	3.231e+08	6.89968e+08	297473488	2.9826e+08	2.81745e+08
203POS	Y	DG(20:2/18:2)+NH4	DG(38:4)+NH4	DG	(20:2/18:2)	(20:2)	(18:2)			C41 H76 O5 N1	662.572	12.8177	0.0176846	2.12666	0.0214707	1.1038	4.25147e+08	4.71921e+08	1555727340	3.17132e+08	8.01861e+08	6.57112e+08	1221639583	1478652366	4.06791e+08	3.83207e+08	5.55111e+08	7.59389e+08	4.28611e+08	4.23282e+08	413874738
229POS	Y	DG(18:1/22:6)+NH4	DG(40:7)+NH4	DG	(18:1/22:6)	(18:1)	(22:6)			C43 H74 O5 N1	684.556	11.3924	0.018288	2.26571	0.0370487	1.73629	5.91854e+08	6.78471e+08	1888523443	4.21809e+08	1114843032	2863006325	9.23079e+08	1146656640	6.98923e+08	3.99885e+08	6.6751e+08	1324821584	4.92379e+08	4.93061e+08	4.77287e+08
251POS	Y	PC(30:1)+H	PC(30:1)+H	PC	(30:1)	(30:1)				C38 H75 O8 N1 P1	704.522	8.70872	0.017653	2.77421	0.000625801	1.03123	1.42057e+08	6.03043e+08	5.2964e+08	1.22205e+08	2.63304e+08	2.33651e+08	643199960	645115128	203837100	1.72653e+08	2.91963e+08	6.63361e+08	1.70047e+08	170112148	1.64932e+08
255POS	Y	PC(30:0)+H	PC(30:0)+H	PC	(30:0)	(30:0)				C38 H77 O8 N1 P1	706.538	9.75399	0.0120782	2.19393	0.0002452	1.9626	8.91226e+08	2928380985	2671143494	9.08154e+08	1580539528	1454921055	2413130310	2706159215	1167266277	9.7627e+08	1292673105	2780403247	1220362063	1220229235	1194944078
279POS	Y	PC(32:0e)+H	PC(32:0e)+H	PC	(32:0e)	(32:0e)				C40 H83 O7 N1 P1	720.59	11.345	0.0370384	2.05856	0.00506039	1.65043	7.77582e+08	2549859385	2584792173	6.8717e+08	1310199025	1041507214	2572866760	1925780635	9.19883e+08	9.03495e+08	1292829118	1452486210	1184522707	1113778884	1109685267
283POS	Y	PE(16:0p/20:4)+H	PE(36:4p)+H	PE	(16:0p/20:4)	(16:0p)	(20:4)			C41 H75 O7 N1 P1	724.528	10.6056	0.0108805	1.67463	0.00491402	1.2844	1080174095	2171486382	2315161715	9.04919e+08	1406646507	1190551196	2287168448	1775371013	9.66486e+08	8.92375e+08	1572833851	1686984208	9.17168e+08	9.17612e+08	9.00214e+08
292POS	Y	DG(22:6/22:6)+NH4	DG(44:12)+NH4	DG	(22:6/22:6)	(22:6)	(22:6)			C47 H72 O5 N1	730.541	8.92623	0.021884	1.742	0.00902586	2.23526	1971919013	4717482214	5628655116	1882871643	4514119382	4266116478	5991485573	6123399949	3489068883	2891972140	5179709909	7990354272	2183672218	2184903296	2102534120
297POS	Y	PC(32:1)+H	PC(32:1)+H	PC	(32:1)	(32:1)				C40 H79 O8 N1 P1	732.554	9.76624	0.00575059	1.53338	0.000532564	1.38464	3060668367	4879355317	3990025181	2589037664	2946326687	3219652184	5077732613	4379580044	2546794558	2525804532	2953337611	3941472818	3060363043	3060215885	3029909142
302POS	Y	PC(32:0)+H	PC(32:0)+H	PC	(16:0/16:0)	(16:0)	(16:0)			C40 H81 O8 N1 P1	734.569	10.6976	0.0093051	1.39002	0.00266556	2.23547	10081632779	16376046519	16650916065	9207317021	12039105156	10390295419	15427984739	15895491217	10651588287	10243175723	11831965953	14296686985	10895091400	11066331868	10885076150
320POS	Y	PC(34:2e)+H	PC(34:2e)+H	PC	(34:2e)	(34:2e)				C42 H83 O7 N1 P1	744.59	10.6189	0.0117583	2.20886	0.00884209	1.22159	345147253	1528964918	1194924942	3.04983e+08	6.19369e+08	5.10678e+08	1276713612	9.26905e+08	3.89315e+08	4.01147e+08	700250767	6.58747e+08	5.06445e+08	4.99765e+08	4.94717e+08
324POS	Y	PE(36:1)+H	PE(36:1)+H	PE	(18:0/18:1)	(18:0)	(18:1)			C41 H81 O8 N1 P1	746.569	12.0586	0.0126179	2.56082	0.000498521	1.35749	3.04967e+08	1396347356	9.34458e+08	3.19265e+08	6.36853e+08	5.55303e+08	1095811670	1155895863	3.93254e+08	3.41019e+08	4.60714e+08	1151739593	4.19252e+08	4.13875e+08	4.08806e+08
325POS	Y	PC(34:1e)+H	PC(34:1e)+H	PC	(34:1e)	(34:1e)				C42 H85 O7 N1 P1	746.606	11.3678	0.0176688	2.08931	0.00602877	2.20206	1312731224	4855608047	3988498264	9.55471e+08	2393503721	1577996696	4055952152	3296286208	1548296115	1437306541	2240938403	2885268593	1603400300	1593793573	1550881308
341POS	Y	PC(34:4)+H	PC(34:4)+H	PC	(34:4)	(34:4)				C42 H77 O8 N1 P1	754.538	8.27648	0.0211489	2.16734	0.001727	1.07146	2.64123e+08	8.15651e+08	6.24249e+08	1.54927e+08	6.22401e+08	5.45778e+08	8.94062e+08	6.80364e+08	3.21584e+08	2.22927e+08	4.81823e+08	9.21498e+08	2.67483e+08	267748012	2.57934e+08
343POS	Y	PC(34:4)+H	PC(34:4)+H	PC	(14:0/20:4)	(14:0)	(20:4)			C42 H77 O8 N1 P1	754.538	8.72038	0.0164469	1.62392	0.011054	1.11044	9.95355e+08	2152713586	1725943051	6.97575e+08	1527003271	1123119997	1833377195	2208512749	1309012656	1087255662	1507229649	2524195035	6.61257e+08	6.6142e+08	6.42677e+08
347POS	Y	PC(34:3)+H	PC(34:3)+H	PC	(34:3)	(34:3)				C42 H79 O8 N1 P1	756.554	9.41437	0.0148551	1.47009	0.0122988	2.19934	5291013579	7888400227	7427782015	4256042080	8765624024	7885584455	11116964340	9093097912	5615645656	4756345123	7688005132	10059274124	4657485903	4658166658	4539002275
381POS	Y	TG(16:0/10:0/18:1)+NH4	TG(44:1)+NH4	TG	(16:0/10:0/18:1)	(16:0)	(10:0)	(18:1)		C47 H92 O6 N1	766.692	18.0743	0.0260523	7.84453	0.012337	1.00351	3.9696e+07	1.62359e+08	3.29301e+08	3.43836e+07	7.92675e+07	1.67046e+07	6.49063e+08	7.3519e+08	7.48696e+07	3.19407e+07	4.93411e+07	5.3525e+08	1.46085e+08	1.46352e+08	1.39722e+08
387POS	Y	PC(36:4e)+H	PC(36:4e)+H	PC	(36:4e)	(36:4e)				C44 H83 O7 N1 P1	768.59	10.4235	0.0227291	1.7211	0.00438964	1.61815	1298572702	2851273210	3386766794	9.55416e+08	1952083845	1689154499	2984489299	2611809875	1439195244	1394442346	2128870336	2256569783	1217705750	1217849751	1170457482
455POS	Y	SM(d40:1)+H	SM(d40:1)+H	SM	(d40:1)	(d40:1)				C45 H92 O6 N2 P1	787.669	12.8678	0.0169937	0.650608	0.000298078	4.39563	8677820261	5090787722	5701456942	7896123610	9699687516	5848403434	5472660439	5788494306	8184239234	9671975863	10771792103	7817617055	5887148092	5727604689	5708398174
467POS	Y	PE(18:1/22:6)+H	PE(40:7)+H	PE	(18:1/22:6)	(18:1)	(22:6)			C45 H77 O8 N1 P1	790.538	9.90835	0.0101452	0.881786	0.0423084	2.03786	3736734457	3212371501	2913667238	3347101728	3451805330	3652614990	2552248177	2721921209	3296527894	3419567629	3255674773	3030333875	2501035500	2546429749	2503467726
472POS	Y	TG(16:0/12:1/18:2)+NH4	TG(46:3)+NH4	TG	(16:0/12:1/18:2)	(16:0)	(12:1)	(18:2)		C49 H92 O6 N1	790.692	16.9365	0.0192874	6.66205	0.0203096	1.16745	5.94141e+07	1.99078e+08	3.91969e+08	2.8894e+07	1.44174e+08	2.2172e+07	1075227890	7.4364e+08	1.15224e+08	4.9135e+07	1.09648e+08	9.42164e+08	1.50247e+08	1.50413e+08	1.45366e+08
481POS	Y	TG(16:0/12:1/18:1)+NH4	TG(46:2)+NH4	TG	(16:0/12:1/18:1)	(16:0)	(12:1)	(18:1)		C49 H94 O6 N1	792.708	18.2205	0.0228106	5.83472	0.0118661	2.17626	3.5818e+08	9.04264e+08	1706121643	1.24439e+08	5.15013e+08	104909266	2909737254	3413148895	5.51011e+08	1.75515e+08	320682530	2892898720	7.9455e+08	7.96036e+08	7.64307e+08
484POS	Y	PC(37:5)+H	PC(37:5)+H	PC	(37:5)	(37:5)				C45 H81 O8 N1 P1	794.569	11.441	0.023808	2.67075	0.00351753	1.34244	2.40286e+08	1143567306	884981134	3.07406e+08	6.87448e+08	5.16823e+08	1006802789	1559030250	270071993	2.29854e+08	4.71668e+08	7.82439e+08	380476322	3.8073e+08	3.65123e+08
486POS	Y	PC(38:4p)+H	PC(38:4p)+H	PC	(38:4p)	(38:4p)				C46 H85 O7 N1 P1	794.606	10.4634	0.0096691	1.7494	0.00661014	1.39447	1016261598	2657932593	2259781947	7.39236e+08	1388935364	1082049900	2245007505	2073682039	1143943659	1087884524	1463529261	1647065615	1083419911	1083425089	1065378754
488POS	Y	TG(16:0/14:0/16:1)+NH4	TG(46:1)+NH4	TG	(16:0/14:0/16:1)	(16:0)	(14:0)	(16:1)		C49 H96 O6 N1	794.723	19.4817	0.0132653	4.60026	0.00773148	1.77132	3.44577e+08	9.46795e+08	1229737974	194363293	4.35171e+08	1.20058e+08	2083142281	2227353872	3.9889e+08	1.52407e+08	2.62687e+08	1618609940	9.17997e+08	9.12423e+08	8.94904e+08
489POS	Y	Co(Q9)+H	Co(Q9)+H	Co	(Q9)	(Q9)				C54 H83 O4	795.629	15.912	0.0133934	1.46939	0.0253886	1.74201	3451419660	4623092186	6369663242	2662678995	5817811147	4334574490	4790643989	6154329056	3004448017	2535943128	4756960002	6391087108	2006339894	2007066033	1960512758
520POS	Y	PC(38:7)+H	PC(38:7)+H	PC	(38:7)	(38:7)				C46 H79 O8 N1 P1	804.554	8.42114	0.0213551	1.56164	0.0276203	1.63785	2540904327	4144636147	4198676460	1675787103	4372857090	3325795816	4274428919	3567975606	2508503986	1812995892	3584641617	6248805081	1653319240	1654027606	1593255161
537POS	Y	PC(18:0/18:2)+Na	PC(36:2)+Na	PC	(18:0/18:2)	(18:0)	(18:2)			C44 H84 O8 N1 P1 Na1	808.583	10.154	0.00526598	1.32772	0.011687	1.22947	3533155351	5019445274	4904782652	3206524199	4539860082	4322200697	4305479669	6041374178	3288222481	2890453468	4265230025	4249436504	3146240833	3152816137	3121458906
541POS	Y	SM(d18:1/24:3)+H	SM(d42:4)+H	SM	(d18:1/24:3)	(d18:1)	(24:3)			C47 H90 O6 N2 P1	809.653	12.8883	0.0112953	0.539087	9.76189e-08	2.07064	1606471302	833447587	8.4638e+08	1696851267	1595770747	9.49691e+08	8.38728e+08	8.72777e+08	1501953532	1837799195	1710503537	1022540924	1509597342	1480688965	1480204382
544POS	Y	PC(18:0/18:1)+Na	PC(36:1)+Na	PC	(18:0/18:1)	(18:0)	(18:1)			C44 H86 O8 N1 P1 Na1	810.598	11.7543	0.0198118	0.626169	8.25406e-05	1.63855	1380937572	7.43725e+08	7.68398e+08	1281206806	9.62644e+08	8.86939e+08	8.31119e+08	7.89349e+08	1276129970	1161895127	1341253723	6.16672e+08	1840382011	1778523712	1778760214
553POS	Y	SM(d42:3)+H	SM(d42:3)+H	SM	(d42:3)	(d42:3)				C47 H92 O6 N2 P1	811.669	11.8455	0.0257778	1.79371	0.00764832	1.9427	1230803236	3377704298	3218445237	1038733014	3427754908	2350633601	3398487256	3524515729	1504661923	1195223356	2515962837	3705270115	1553729321	1492558700	1481496288
559POS	Y	Co(Q9)+NH4	Co(Q9)+NH4	Co	(Q9)	(Q9)				C54 H86 O4 N1	812.655	15.912	0.0178371	1.44653	0.0241297	1.61725	3212975534	4287109663	5625634337	2395374196	5323717323	4067550580	4290344522	5429568221	2799080844	2302904326	4206632684	5578650509	1917212017	1860810462	1857665663
569POS	Y	SM(d42:1)+H	SM(d42:1)+H	SM	(d42:1)	(d42:1)				C47 H96 O6 N2 P1	815.7	14.0461	0.0223008	0.634434	0.00229204	3.61799	4360264116	3708902392	3734999156	5724965604	6940144505	3561959152	3629275130	3753381164	5976543983	6670488068	7813859562	5394039241	3663894631	3669971570	3527191971
576POS	Y	TG(12:0/18:2/18:2)+NH4	TG(48:4)+NH4	TG	(12:0/18:2/18:2)	(12:0)	(18:2)	(18:2)		C51 H94 O6 N1	816.708	17.1305	0.0863953	7.07425	0.0035594	1.10241	5.15569e+07	3.20058e+08	5.01974e+08	2.71268e+07	1.15989e+08	2.58521e+07	7.44074e+08	5.74321e+08	7.03004e+07	4.23218e+07	7.78031e+07	5.57997e+08	1.45262e+08	1.44511e+08	1.67696e+08
578POS	Y	TG(16:0/14:2/18:2)+NH4	TG(48:4)+NH4	TG	(16:0/14:2/18:2)	(16:0)	(14:2)	(18:2)		C51 H94 O6 N1	816.708	17.5914	0.0129422	5.90157	0.015668	1.00323	4.36732e+07	1.71468e+08	3.56759e+08	3.30327e+07	1.38956e+08	4.52778e+07	763445776	7.49896e+08	9.37883e+07	4.06422e+07	8.22857e+07	4.64861e+08	1.44386e+08	1.43539e+08	1.40844e+08
589POS	Y	TG(16:1/14:0/18:2)+NH4	TG(48:3)+NH4	TG	(16:1/14:0/18:2)	(16:1)	(14:0)	(18:2)		C51 H96 O6 N1	818.723	18.2619	0.0205742	4.09662	0.00975394	2.9994	1015833768	2752519349	3573092016	318811303	1484880394	3.41156e+08	6684162475	5289006970	1371618294	402010843	1242441632	5266267806	1800976657	1738537297	1738040040
599POS	Y	TG(16:0/14:0/18:2)+NH4	TG(48:2)+NH4	TG	(16:0/14:0/18:2)	(16:0)	(14:0)	(18:2)		C51 H98 O6 N1	820.739	19.5142	0.00532412	3.05683	0.00834269	3.5344	3234881685	6397198191	7014585899	9.37139e+08	2601328255	1315325268	10805312330	7369809982	2188542611	9.0324e+08	2716927053	5558996977	3642682341	3609722836	3608884928
609POS	Y	TG(16:0/14:0/18:1)+NH4	TG(48:1)+NH4	TG	(16:0/14:0/18:1)	(16:0)	(14:0)	(18:1)		C51 H100 O6 N1	822.755	20.6554	0.0094914	2.17929	0.0150873	2.20676	2023702669	3096184528	3789941318	1538137687	2337181286	1031690527	4792128043	5842700378	1846634930	9.37767e+08	1669250895	4008871220	3309334353	3305489927	3253438005
662POS	Y	PC(40:5)+H	PC(40:5)+H	PC	(40:5)	(40:5)				C48 H87 O8 N1 P1	836.616	11.1754	0.0225872	2.00911	0.00235103	1.43845	7.28315e+08	2095135032	1650532486	810233151	1101729914	1109202599	1598922298	2375775465	7.1791e+08	6.71025e+08	9.95438e+08	1265515546	1120765684	1121836629	1078007994
664POS	Y	TG(16:0/16:0/17:1)+NH4	TG(49:1)+NH4	TG	(16:0/16:0/17:1)	(16:0)	(16:0)	(17:1)		C52 H102 O6 N1	836.77	21.3218	0.0245632	2.33323	0.0329678	1.07593	6.06606e+08	6.99225e+08	6.35258e+08	1.95419e+08	4.67115e+08	1.30286e+08	1220653088	1197316927	3.38291e+08	1.40578e+08	2.55709e+08	7.92407e+08	5.92561e+08	5.92185e+08	5.67525e+08
666POS	Y	SM(d42:1)+Na	SM(d42:1)+Na	SM	(d42:1)	(d42:1)				C47 H95 O6 N2 P1 Na1	837.682	14.0461	0.0178427	0.805623	0.00135521	1.62231	1507863301	1201076572	1426540343	1687374990	1895116633	1484937303	1318158133	1473707235	1685786828	1749079360	1899323497	1493828992	1199085315	1200113333	1162915076
670POS	Y	PC(40:4)+H	PC(40:4)+H	PC	(20:0/20:4)	(20:0)	(20:4)			C48 H89 O8 N1 P1	838.632	11.4688	0.0159213	1.66392	0.0144286	1.27	7.05049e+08	1764068907	1932866278	7.01556e+08	1689892280	1061382908	1696113525	1850732666	7.93212e+08	6.4071e+08	1442386009	1633082631	7.43577e+08	7.37213e+08	7.20921e+08
67POS	Y	LPC(18:2)+H	LPC(18:2)+H	LPC	(18:2)	(18:2)				C26 H51 O7 N1 P1	520.34	2.39455	0.0139815	1.56756	0.037827	2.05467	2135474791	3696188181	5998317703	1816335398	5080229369	5867134751	3980800781	5241268527	3357910756	2087638316	5351380109	6299297453	2211965823	2237034703	2175630293
682POS	Y	TG(16:0/12:0/22:6)+NH4	TG(50:6)+NH4	TG	(16:0/12:0/22:6)	(16:0)	(12:0)	(22:6)		C53 H94 O6 N1	840.708	17.2438	0.0146922	7.98253	0.0128002	1.32574	6.87098e+07	2.67296e+08	5.56809e+08	3.50275e+07	1.55417e+08	4.00776e+07	9.32506e+08	1243852833	150877875	4.52375e+07	7.5022e+07	1192529640	1.55504e+08	1.53571e+08	1.51012e+08
683POS	Y	TG(12:0/18:2/20:4)+NH4	TG(50:6)+NH4	TG	(12:0/18:2/20:4)	(12:0)	(18:2)	(20:4)		C53 H94 O6 N1	840.708	16.684	0.0760773	4.28909	0.0294931	1.14585	9.09492e+07	2.64728e+08	4.83963e+08	4.62422e+07	3.5874e+08	7.10148e+07	7.2751e+08	1052856376	1.67301e+08	7.84959e+07	1.64974e+08	1288859591	2.02193e+08	2.29469e+08	2.0118e+08
68POS	Y	LPC(18:1)+H	LPC(18:1)+H	LPC	(18:1)	(18:1)				C26 H53 O7 N1 P1	522.355	2.9304	0.0190937	1.86482	0.0013788	1.6206	9.59126e+08	2323077745	2206372879	6.06946e+08	1804952428	1849533341	1652062621	2390831884	1120336833	9.19334e+08	1553075424	2564290641	9.65665e+08	9.92638e+08	9.57078e+08
691POS	Y	TG(14:0/18:2/18:3)+NH4	TG(50:5)+NH4	TG	(14:0/18:2/18:3)	(14:0)	(18:2)	(18:3)		C53 H96 O6 N1	842.723	17.5869	0.0161088	4.25822	0.0158649	1.77403	4.96464e+08	8.39512e+08	9.5162e+08	8.52592e+07	5.49563e+08	1.48341e+08	2461444911	1829916962	3.69485e+08	9.83028e+07	3.29038e+08	1979496821	4.58773e+08	4.55638e+08	4.44859e+08
692POS	Y	TG(14:0/18:2/18:3)+NH4	TG(50:5)+NH4	TG	(14:0/18:2/18:3)	(14:0)	(18:2)	(18:3)		C53 H96 O6 N1	842.723	18.0042	0.0351744	3.56112	0.0357501	1.29358	1.90573e+08	329755625	6.80683e+08	6.85196e+07	5.38539e+08	1.15465e+08	1698455162	1133973779	2.66996e+08	8.56432e+07	2.43453e+08	1004885079	2.83876e+08	2.67653e+08	2.66886e+08
702POS	Y	TG(16:0/14:0/20:4)+NH4	TG(50:4)+NH4	TG	(16:0/14:0/20:4)	(16:0)	(14:0)	(20:4)		C53 H98 O6 N1	844.739	19.1691	0.0679317	3.55307	0.0266269	1.50926	3.25759e+08	663545064	9.09971e+08	1.25371e+08	6.14409e+08	1.47009e+08	2228900321	1705035961	3.80544e+08	1.41394e+08	3.20132e+08	1123406699	5.47258e+08	4.8821e+08	4.86912e+08
707POS	Y	TG(16:0/16:0/18:3)+NH4	TG(50:3)+NH4	TG	(16:0/16:0/18:3)	(16:0)	(16:0)	(18:3)		C53 H100 O6 N1	846.755	19.8916	0.0115407	3.32845	0.0191455	1.60217	5.21244e+08	9.09777e+08	1000576920	1.68342e+08	7.35619e+08	2.35482e+08	2227261491	2063615657	3.76413e+08	154943735	3.40952e+08	1210450407	8.40897e+08	841565710	8.24537e+08
71POS	Y	LPE(22:6)+H	LPE(22:6)+H	LPE	(22:6)	(22:6)				C27 H45 O7 N1 P1	526.293	2.31322	0.0125844	1.9734	0.000954807	1.0205	3.3242e+08	6.42975e+08	8.11857e+08	234421040	6.26556e+08	6.57587e+08	6.04891e+08	9.55091e+08	3.15325e+08	2.92828e+08	451299187	7.73362e+08	2.8225e+08	2.82109e+08	2.76075e+08
721POS	Y	TG(16:0/16:0/18:1)+NH4	TG(50:1)+NH4	TG	(16:0/16:0/18:1)	(16:0)	(16:0)	(18:1)		C53 H104 O6 N1	850.786	21.6227	0.00685486	1.55441	0.045205	1.99805	7169975000	6892128140	7993229703	5321339560	6205749276	4103810250	12073424880	11887240530	6144026876	3576543558	4865479994	8785723860	7923911911	7923894617	7830193893
738POS	Y	PC(42:10)+H	PC(42:10)+H	PC	(42:10)	(42:10)				C50 H81 O8 N1 P1	854.569	8.48899	0.0180615	1.83064	0.00243261	1.14638	6.28441e+08	9.543e+08	1401984276	3.33624e+08	8.91117e+08	8.27124e+08	1154913249	1149146593	5.57941e+08	5.57823e+08	830514913	1467974229	3.84772e+08	3.86497e+08	373787836
782POS	Y	TG(16:0/14:1/22:6)+NH4	TG(52:7)+NH4	TG	(16:0/14:1/22:6)	(16:0)	(14:1)	(22:6)		C55 H96 O6 N1	866.723	17.2197	0.0772396	4.13283	0.0201071	1.2478	1.8559e+08	4.11462e+08	5.05258e+08	5.45216e+07	2.90242e+08	6.37701e+07	1091158573	9.8617e+08	2.58211e+08	8.85494e+07	1.90165e+08	1353057763	1.71956e+08	194631376	169648378
784POS	Y	TG(18:4/16:1/18:2)+NH4	TG(52:7)+NH4	TG	(18:4/16:1/18:2)	(18:4)	(16:1)	(18:2)		C55 H96 O6 N1	866.723	16.7157	0.0346598	4.55882	0.0452133	1.49539	1.8629e+08	4.73295e+08	626001968	6.08509e+07	5.0257e+08	1.23177e+08	2504525784	1056225661	2.37326e+08	7.65738e+07	3.09606e+08	1477029100	2.96192e+08	2.95965e+08	2.78654e+08
790POS	Y	TG(18:4/16:0/18:2)+NH4	TG(52:6)+NH4	TG	(18:4/16:0/18:2)	(18:4)	(16:0)	(18:2)		C55 H98 O6 N1	868.739	17.9182	0.0196189	3.31338	0.0298826	3.14821	1441855263	2822602316	3636812724	4.49541e+08	3198461500	6.86411e+08	9718362711	7177651984	1633982174	814204841	1604701214	6251540026	1757950768	1702775648	1696754968
791POS	Y	TG(16:0/14:0/22:6)+NH4	TG(52:6)+NH4	TG	(16:0/14:0/22:6)	(16:0)	(14:0)	(22:6)		C55 H98 O6 N1	868.739	18.5893	0.0092275	3.9073	0.00848694	1.92853	4.42032e+08	1136509402	1762471278	1.93108e+08	8.72561e+08	3.26269e+08	2097202116	3043191195	5.6916e+08	1.93713e+08	3.49648e+08	1872339807	8.94245e+08	8.81278e+08	8.79165e+08
792POS	Y	TG(16:0/16:1/20:5)+NH4	TG(52:6)+NH4	TG	(16:0/16:1/20:5)	(16:0)	(16:1)	(20:5)		C55 H98 O6 N1	868.739	18.2075	0.0136983	2.96955	0.0315714	1.4248	4.13673e+08	7.40817e+08	9.0361e+08	1.23597e+08	7.62901e+08	1.61489e+08	2091755314	1368232839	3.59383e+08	106164965	3.7764e+08	1098916890	4.07677e+08	404982737	3.97051e+08
799POS	Y	TG(16:0/18:2/18:3)+NH4	TG(52:5)+NH4	TG	(16:0/18:2/18:3)	(16:0)	(18:2)	(18:3)		C55 H100 O6 N1	870.755	19.1592	0.0157856	3.00546	0.0205924	3.36287	2245251788	4397800621	4604438545	7.8237e+08	3884595940	818707742	9947230649	8409023584	2018786920	7.62796e+08	1874837026	6591865749	2730931644	2732855259	2657892670
876POS	Y	TG(14:0/18:2/22:6)+NH4	TG(54:8)+NH4	TG	(14:0/18:2/22:6)	(14:0)	(18:2)	(22:6)		C57 H98 O6 N1	892.739	17.4767	0.0175398	2.13466	0.0487711	1.63925	8.20455e+08	1330482276	1809397706	3.51903e+08	1734029864	3.29574e+08	3025966726	2265810083	1119532795	3.67798e+08	9.48147e+08	2641840414	6.32402e+08	614190421	6.13006e+08
877POS	Y	TG(14:0/18:2/22:6)+NH4	TG(54:8)+NH4	TG	(14:0/18:2/22:6)	(14:0)	(18:2)	(22:6)		C57 H98 O6 N1	892.739	17.739	0.0276304	3.46584	0.0104824	1.25386	211185353	4.30667e+08	6.99896e+08	8.43362e+07	4.24459e+08	147329617	1139703899	1058708564	2.85233e+08	1.02392e+08	1.82831e+08	9.9614e+08	2.60355e+08	2.48621e+08	247965896
878POS	Y	TG(18:3/18:2/18:3)+NH4	TG(54:8)+NH4	TG	(18:3/18:2/18:3)	(18:3)	(18:2)	(18:3)		C57 H98 O6 N1	892.739	17.0461	0.019869	2.92079	0.0469975	1.37779	2.40515e+08	6.26092e+08	678119409	1.19157e+08	7.63949e+08	1.83654e+08	2141264615	1183005511	4.50962e+08	1.25924e+08	4.87881e+08	1579698530	3.28472e+08	3.28906e+08	3.17512e+08
883POS	Y	TG(18:3/18:2/18:2)+NH4	TG(54:7)+NH4	TG	(18:3/18:2/18:2)	(18:3)	(18:2)	(18:2)		C57 H100 O6 N1	894.755	17.666	0.0552309	2.39543	0.0405211	2.15594	1956125103	6058509550	1998983250	6.24575e+08	2838664277	2326141250	3928442982	2710012681	1596563800	9.20787e+08	2486648578	7946346531	1298913319	1297841994	1426671528
884POS	Y	TG(16:0/18:2/20:5)+NH4	TG(54:7)+NH4	TG	(16:0/18:2/20:5)	(16:0)	(18:2)	(20:5)		C57 H100 O6 N1	894.755	18.615	0.0983506	1.97892	0.0301028	2.38857	2710652789	4278583506	4684679395	1224158904	3995223463	1246207772	6193223008	6036482592	2565005677	9.84153e+08	1862191528	3962362471	3171390606	3161140513	3738030840
886POS	Y	TG(18:3/18:2/18:2)+NH4	TG(54:7)+NH4	TG	(18:3/18:2/18:2)	(18:3)	(18:2)	(18:2)		C57 H100 O6 N1	894.755	17.9966	0.0242076	3.29363	0.0187086	2.95617	1213213321	2728023612	3482762474	6.35725e+08	2659079646	6.22412e+08	7588337035	6131809842	1354356057	6.75212e+08	1430286528	5689862907	1425823501	1430131828	1369045847
891POS	Y	TG(18:2/18:2/18:2)+NH4	TG(54:6)+NH4	TG	(18:2/18:2/18:2)	(18:2)	(18:2)	(18:2)		C57 H102 O6 N1	896.77	17.9551	0.0162813	3.38864	0.0369324	1.9888	7.63004e+08	1671320703	1729679991	3.78682e+08	7.49252e+08	4.98741e+08	5265802550	2449056204	9.56955e+08	3.53211e+08	8.06115e+08	1964442133	8.16279e+08	7.94446e+08	7.92992e+08
893POS	Y	TG(18:1/18:2/18:3)+NH4	TG(54:6)+NH4	TG	(18:1/18:2/18:3)	(18:1)	(18:2)	(18:3)		C57 H102 O6 N1	896.77	18.8825	0.0186076	2.05676	0.0363954	2.71324	2883086639	4873553412	4556828111	9.9189e+08	4479997424	1258778403	7881949907	5738348865	2976924075	9.69357e+08	3182709141	7537348219	3053104083	2967438167	2948781387
894POS	Y	TG(16:0/18:2/20:4)+NH4	TG(54:6)+NH4	TG	(16:0/18:2/20:4)	(16:0)	(18:2)	(20:4)		C57 H102 O6 N1	896.77	19.8202	0.0078973	2.59475	0.00877389	2.69714	1847081723	2902559570	4470958436	1178662460	2899703706	1790333835	5651146528	7118570113	1775607646	9.81089e+08	1388048972	4196094234	2965847807	2967663921	2926389703
91POS	Y	LPC(20:4)+H	LPC(20:4)+H	LPC	(20:4)	(20:4)				C28 H51 O7 N1 P1	544.34	2.3204	0.0136556	1.73704	0.0140525	1.79339	1407144260	2629866013	3637656332	8.63856e+08	2992621682	3210518695	2020414992	3210362088	1705784840	1066340435	2610023973	3783293930	1219957036	1218884937	1190819527
943POS	Y	TG(16:0/18:3/22:6)+NH4	TG(56:9)+NH4	TG	(16:0/18:3/22:6)	(16:0)	(18:3)	(22:6)		C59 H100 O6 N1	918.755	17.8513	0.0267231	2.38913	0.0199785	1.53511	567484343	9.27814e+08	1201986480	2.42566e+08	1336441388	5.88502e+08	2029848312	2084163829	5.91845e+08	234583445	5.75566e+08	1645471123	5.0802e+08	4.85552e+08	484882540
960POS	Y	TG(18:0/16:0/22:6)+NH4	TG(56:6)+NH4	TG	(18:0/16:0/22:6)	(18:0)	(16:0)	(22:6)		C59 H106 O6 N1	924.801	21.0505	0.0116293	2.33451	0.0290415	1.60717	7.7426e+08	9.55342e+08	2250552847	5.89441e+08	1647146330	7.53513e+08	2397559395	3347130106	8.20083e+08	4.70948e+08	6.32487e+08	1815215509	1134306760	1112071738	1111463765
989POS	Y	TG(16:0/20:5/22:6)+NH4	TG(58:11)+NH4	TG	(16:0/20:5/22:6)	(16:0)	(20:5)	(22:6)		C61 H100 O6 N1	942.755	17.4176	0.0110801	2.8228	0.0241286	1.10508	2.24564e+08	3.33358e+08	5.9682e+08	9.24978e+07	5.32955e+08	1.49873e+08	9.7168e+08	9.71294e+08	2.49716e+08	7.91505e+07	2.18707e+08	9.22094e+08	1.80375e+08	1.80304e+08	1.76901e+08
997POS	Y	TG(18:2/18:2/22:6)+NH4	TG(58:10)+NH4	TG	(18:2/18:2/22:6)	(18:2)	(18:2)	(22:6)		C61 H102 O6 N1	944.77	17.945	0.0739076	2.32452	0.046067	1.31128	6.01727e+08	8.52161e+08	1107372760	2.18208e+08	9.88902e+08	3.2714e+08	1370275015	1349051045	5.02472e+08	2.34402e+08	6.59359e+08	2444259196	4.43616e+08	4.8798e+08	4.22635e+08
1000POS		TG(18:1/18:2/21:0)+NH4	TG(57:3)+NH4	TG	(18:1/18:2/21:0)	(18:1)	(18:2)	(21:0)		C60 H114 O6 N1	944.864	22.6519	0.0216408	1.55252	0.0975248	0.167832	6.01453e+07	6.45446e+07	6.20744e+07	2.5828e+07	2.51909e+07	9.2682e+06	6.97575e+07	7.46549e+07	4.5105e+07	3.33687e+07	3.77729e+07	7.27605e+07	3.86764e+07	3.75024e+07	3.71047e+07
1001POS		TG(20:0p/18:1/20:1)+NH4	TG(58:2p)+NH4	TG	(20:0p/18:1/20:1)	(20:0p)	(18:1)	(20:1)		C61 H118 O5 N1	944.9	23.7293	0.0176853	2.51916	0.0173617	0.258917	1.80998e+07	5.1675e+07	9.22313e+07	1.60084e+07	2.34955e+07	1.33651e+07	5.79597e+07	3.6654e+07	2.16076e+07	1.78397e+07	2.29159e+07	5.03304e+07	22841467	2.22876e+07	2.20738e+07
1002POS		TG(20:0e/18:0/20:3)+NH4	TG(58:3e)+NH4	TG	(20:0e/18:0/20:3)	(20:0e)	(18:0)	(20:3)		C61 H118 O5 N1	944.9	24.003	0.045251	2.003	0.0795516	0.0719177	2.05548e+06	4.48067e+06	1.23723e+07	2.83575e+06	5.58303e+06	1.99037e+06	9.90491e+06	4.82218e+06	3.40763e+06	2.5306e+06	2.95688e+06	5.22644e+06	3.10549e+06	3.11266e+06	2.87168e+06
1003POS		CerG2(d18:1/22:0)+H	CerG2(d40:1)+H	CerG2	(d18:1/22:0)	(d18:1)	(22:0)			C52 H100 O13 N1	946.719	12.7648	0.0262574	1.77228	0.00660876	0.168565	2.01431e+07	4.40944e+07	2.77419e+07	1.11947e+07	2.12805e+07	2.24951e+07	4.01425e+07	3.58644e+07	1.9693e+07	1.68782e+07	3.17446e+07	4.3991e+07	26360338	2.52505e+07	2.51494e+07
1004POS		TG(22:5/18:2/18:2)+NH4	TG(58:9)+NH4	TG	(22:5/18:2/18:2)	(22:5)	(18:2)	(18:2)		C61 H104 O6 N1	946.786	17.6841	0.0096612	1.01031	0.952211	0.726526	1039905963	9.34196e+08	1500913370	8.1572e+08	1529977812	6.14289e+08	1265672154	1111523407	1140988088	8.17094e+08	1510417779	1498156280	5.98375e+08	597822390	5.88157e+08
1005POS		TG(22:5/18:2/18:2)+NH4	TG(58:9)+NH4	TG	(22:5/18:2/18:2)	(22:5)	(18:2)	(18:2)		C61 H104 O6 N1	946.786	18.1944	0.0292626	2.0365	0.092544	1.03585	4.62119e+08	4.38069e+08	1118985661	2.09891e+08	8.70852e+08	2.6461e+08	1198329221	9.96238e+08	5.11417e+08	2.2979e+08	6.78356e+08	2016750089	4.22819e+08	4.23343e+08	4.01998e+08
1006POS		TG(16:0/20:3/22:6)+NH4	TG(58:9)+NH4	TG	(16:0/20:3/22:6)	(16:0)	(20:3)	(22:6)		C61 H104 O6 N1	946.786	19.3069	0.123192	3.4116	0.00275405	0.660573	5.38211e+07	2.59697e+08	2.93819e+08	9.23508e+07	4.09669e+07	8.11296e+07	2.33197e+08	4.16261e+08	1.33297e+08	9.13988e+07	4.47893e+07	2.73711e+08	9.23023e+07	1.12992e+08	9.14877e+07
1007POS		TG(18:1/18:2/22:6)+NH4	TG(58:9)+NH4	TG	(18:1/18:2/22:6)	(18:1)	(18:2)	(22:6)		C61 H104 O6 N1	946.786	18.7926	0.0271526	1.18685	0.206952	0.868039	4813012633	5859935954	6259157924	3429680180	5830973336	3006456042	5342010569	5253634894	4751900297	3294280500	4493014474	5864338513	3923680117	3925152166	3742705168
1008POS		TG(18:1/18:2/22:6)+NH4	TG(58:9)+NH4	TG	(18:1/18:2/22:6)	(18:1)	(18:2)	(22:6)		C61 H104 O6 N1	946.786	17.2135	0.0123006	1.39088	0.150888	0.450899	3.02112e+08	4.38519e+08	5.08761e+08	1.56919e+08	597324319	2.40179e+08	5.6696e+08	5.09296e+08	3.51572e+08	1.7784e+08	4.58803e+08	5.80032e+08	1.97698e+08	1.97672e+08	1.93503e+08
1009POS		TG(18:1/18:1/21:0)+NH4	TG(57:2)+NH4	TG	(18:1/18:1/21:0)	(18:1)	(18:1)	(21:0)		C60 H116 O6 N1	946.88	22.67	0.016716	1.37773	0.197107	0.133171	4.90072e+07	4.83474e+07	3.85136e+07	21333067	3.08682e+07	8.66992e+06	4.6188e+07	5.70989e+07	3.11024e+07	2.22898e+07	2.2848e+07	4.56584e+07	2.17677e+07	2.11585e+07	2.11407e+07
100POS		LPC(20:2)+H	LPC(20:2)+H	LPC	(20:2)	(20:2)				C28 H55 O7 N1 P1	548.371	3.11019	0.0138673	2.01728	0.00137732	0.277435	2.11457e+07	6.69829e+07	6.21399e+07	1.33549e+07	3.89356e+07	4.00085e+07	4.20441e+07	6.17007e+07	2.80388e+07	2.24671e+07	4.06276e+07	5.91078e+07	2.40367e+07	2.40291e+07	2.34603e+07
1010POS		TG(18:1/18:1/21:0)+NH4	TG(57:2)+NH4	TG	(18:1/18:1/21:0)	(18:1)	(18:1)	(21:0)		C60 H116 O6 N1	946.88	23.1998	0.0183791	0.883745	0.508848	0.208801	3.95688e+07	2.97611e+07	3.01944e+07	2.52814e+07	4.32586e+07	6.04454e+06	3.62742e+07	3.66246e+07	3.43408e+07	2.89271e+07	2.92622e+07	3.84148e+07	2.14901e+07	2.11007e+07	2.07145e+07
1011POS		TG(20:0e/18:1/20:1)+NH4	TG(58:2e)+NH4	TG	(20:0e/18:1/20:1)	(20:0e)	(18:1)	(20:1)		C61 H120 O5 N1	946.916	24.1205	0.0190567	2.46565	0.0532562	0.245547	1.51192e+07	4.69307e+07	1.12364e+08	1.63545e+07	2.72106e+07	1.20288e+07	6.10711e+07	3.6087e+07	2.28311e+07	2.03075e+07	2.33628e+07	4.01828e+07	2.33701e+07	2.26549e+07	2.2581e+07
1012POS		CerG2(d18:0/22:0)+H	CerG2(d40:0)+H	CerG2	(d18:0/22:0)	(d18:0)	(22:0)			C52 H102 O13 N1	948.735	13.1259	0.181022	0.541868	0.190107	0.090137	836164	1.61605e+06	1.25861e+06	5.1877e+06	8.35806e+06	5.08644e+06	1.48612e+06	1.15866e+06	3.73436e+06	6.28301e+06	929167	3.11879e+06	1.64718e+06	2.20634e+06	1.62184e+06
1013POS		TG(18:1/18:2/22:5)+NH4	TG(58:8)+NH4	TG	(18:1/18:2/22:5)	(18:1)	(18:2)	(22:5)		C61 H106 O6 N1	948.801	19.2819	0.0332324	1.53974	0.0793068	0.840423	1010044532	1417616024	1504238709	5.82235e+08	1243439328	5.67995e+08	1520148708	1284540503	1085758537	5.58805e+08	1114527585	2320030491	1194972587	1130330736	1127236842
1014POS		TG(18:1/18:2/22:5)+NH4	TG(58:8)+NH4	TG	(18:1/18:2/22:5)	(18:1)	(18:2)	(22:5)		C61 H106 O6 N1	948.801	20.1807	0.0430553	1.96167	0.169574	0.917581	6.4621e+08	576286269	2823201799	4.44078e+08	1059121233	3.27268e+08	2523270578	1010213196	735202358	513314410	6.91967e+08	7.62779e+08	9.7647e+08	8.98791e+08	9.20214e+08
1015POS		TG(18:1/18:1/22:6)+NH4	TG(58:8)+NH4	TG	(18:1/18:1/22:6)	(18:1)	(18:1)	(22:6)		C61 H106 O6 N1	948.801	19.9054	0.0456742	1.16989	0.208852	0.524362	2816518432	3542876383	3046187092	1987601738	2686929281	1851583935	2565767709	2606569619	2787480016	1772902322	2088438909	2929130331	2049695660	2214425093	2046387290
1016POS		TG(18:1/18:1/22:6)+NH4	TG(58:8)+NH4	TG	(18:1/18:1/22:6)	(18:1)	(18:1)	(22:6)		C61 H106 O6 N1	948.801	18.1805	0.00994937	1.11438	0.493914	0.253435	5.93097e+08	6.58715e+08	876754209	4.22949e+08	9.41405e+08	5.1094e+08	8.06333e+08	5.79092e+08	7.26969e+08	4.76436e+08	7.56881e+08	9.34008e+08	4.70976e+08	4.63074e+08	4.62835e+08
1017POS		TG(18:1/18:2/22:5)+NH4	TG(58:8)+NH4	TG	(18:1/18:2/22:5)	(18:1)	(18:2)	(22:5)		C61 H106 O6 N1	948.801	19.5491	0.0107475	1.13638	0.480465	0.545485	1264941038	1156658879	1315341733	7.39737e+08	1387765362	5.24883e+08	1051201215	1366093061	1149386868	5.8454e+08	8.41852e+08	1367968520	7.95928e+08	7.81406e+08	781183587
1018POS		TG(16:0/18:1/23:0)+NH4	TG(57:1)+NH4	TG	(16:0/18:1/23:0)	(16:0)	(18:1)	(23:0)		C60 H118 O6 N1	948.895	23.7234	0.0208254	0.668565	0.0282843	0.14942	1.13692e+07	7.70719e+06	7.22971e+06	8.32562e+06	1.36405e+07	1.92086e+06	8.15106e+06	7.07299e+06	1.08786e+07	8.71307e+06	9370496	9.56813e+06	5.87462e+06	5.71902e+06	5.63942e+06
101POS		LPC(20:1)+H	LPC(20:1)+H	LPC	(20:1)	(20:1)				C28 H57 O7 N1 P1	550.387	4.2357	0.0302211	1.48007	0.0436612	0.170433	2.73252e+07	7.05927e+07	5.48115e+07	1.87352e+07	4.1412e+07	3.21601e+07	3.58892e+07	4.34619e+07	3.35435e+07	3.08734e+07	4.02247e+07	4.74271e+07	2.18189e+07	2.29632e+07	2.17852e+07
1021POS		TG(18:1/18:1/22:5)+NH4	TG(58:7)+NH4	TG	(18:1/18:1/22:5)	(18:1)	(18:1)	(22:5)		C61 H108 O6 N1	950.817	20.5551	0.0368667	1.4235	0.175613	0.829078	1.70457e+08	1895360065	1454286661	8.80264e+08	1850891570	6.39957e+08	1347086061	1996071992	1401514289	8.55576e+08	1232046150	1764454293	1061644617	1062024563	995445093
1022POS		TG(18:1/18:1/22:4)+NH4	TG(58:6)+NH4	TG	(18:1/18:1/22:4)	(18:1)	(18:1)	(22:4)		C61 H110 O6 N1	952.833	20.391	0.138066	0.965182	0.867551	1.09608	1882836773	2490522295	1777314976	8.06542e+08	2337397217	8.26035e+08	8.91122e+08	2119799736	2163788126	1644188960	1894821673	2251196419	1538886666	1199669925	1543003970
1023POS		TG(18:0/18:1/22:5)+NH4	TG(58:6)+NH4	TG	(18:0/18:1/22:5)	(18:0)	(18:1)	(22:5)		C61 H110 O6 N1	952.833	21.1729	0.0130386	1.46434	0.0768519	0.906176	1480071248	2164811400	2109352625	7.93238e+08	1761123053	5.63149e+08	1924935875	1907096243	1207234145	1138260080	1121581343	2315397900	1195331178	1169530328	1168007572
1024POS		TG(18:0/18:0/22:6)+NH4	TG(58:6)+NH4	TG	(18:0/18:0/22:6)	(18:0)	(18:0)	(22:6)		C61 H110 O6 N1	952.833	21.8884	0.03302	1.61074	0.127096	0.32826	1.30962e+08	1.1485e+08	2.74296e+08	112208617	2.27399e+08	6.84227e+07	2.80629e+08	381006810	1.4305e+08	1.03806e+08	1.11585e+08	216114123	1.26292e+08	119460275	119214873
1025POS		TG(15:0/22:6/22:6)+NH4	TG(59:12)+NH4	TG	(15:0/22:6/22:6)	(15:0)	(22:6)	(22:6)		C62 H100 O6 N1	954.755	17.1987	0.0294164	1.74723	0.112703	0.129441	9.62469e+06	1.18362e+07	2.03029e+07	3.57285e+06	2.35513e+07	5.37794e+06	21487446	2.5802e+07	1.1811e+07	3.979e+06	7.14889e+06	1.94817e+07	5.02804e+06	4.78337e+06	4.77729e+06
1026POS		TG(18:0/20:2/20:3)+NH4	TG(58:5)+NH4	TG	(18:0/20:2/20:3)	(18:0)	(20:2)	(20:3)		C61 H112 O6 N1	954.848	21.4056	0.0199656	1.10817	0.418881	0.470735	6.93602e+08	6.88629e+08	6.85097e+08	4.99519e+08	7.83117e+08	3.7829e+08	7.49487e+08	7.73426e+08	6.46597e+08	4.98224e+08	5.19103e+08	7.58988e+08	5.05306e+08	5.05615e+08	4.88182e+08
1027POS		TG(18:0/18:0/22:5)+NH4	TG(58:5)+NH4	TG	(18:0/18:0/22:5)	(18:0)	(18:0)	(22:5)		C61 H112 O6 N1	954.848	21.9476	0.101958	0.790436	0.0800534	0.611078	2.26489e+08	2.0236e+08	1.92286e+08	2.13692e+08	2.33089e+08	8.69373e+07	2.23016e+08	2.55959e+08	2.69169e+08	2.72236e+08	2.18262e+08	1.72088e+08	2.97829e+08	2.53504e+08	248413274
1028POS		TG(15:0/22:5/22:6)+NH4	TG(59:11)+NH4	TG	(15:0/22:5/22:6)	(15:0)	(22:5)	(22:6)		C62 H102 O6 N1	956.77	17.8235	0.0310973	1.81409	0.0541721	0.210795	2.88552e+07	2.95607e+07	6.52286e+07	4.88137e+06	4.70884e+07	1.88422e+07	5.94836e+07	6.00648e+07	3.46425e+07	1.6566e+07	2.4107e+07	5.00726e+07	1.64643e+07	1.64771e+07	1.55993e+07
1029POS		CerG1(d53:6)+H	CerG1(d53:6)+H	CerG1	(d53:6)	(d53:6)				C59 H106 O8 N1	956.791	13.9559	0.0597793	3.9808	0.083923	0.36953	1.86895e+07	2.20656e+07	5.81219e+07	9.72794e+06	2.74594e+07	5.3854e+07	1.10022e+08	1.44056e+07	1.36428e+07	2.43634e+07	25457658	2.16602e+08	7.37188e+07	7.40315e+07	6.64861e+07
102POS		LPC(20:0)+H	LPC(20:0)+H	LPC	(20:0)	(20:0)				C28 H59 O7 N1 P1	552.402	5.65987	0.0314067	0.650388	0.00970868	0.266462	3.21476e+07	2.49447e+07	2.68201e+07	2.53569e+07	2.96345e+07	1.83623e+07	2.20081e+07	1.98871e+07	3.59768e+07	4.73932e+07	4.54955e+07	2.84645e+07	2.48233e+07	2.48279e+07	2.34992e+07
1030POS		TG(17:0/20:4/22:6)+NH4	TG(59:10)+NH4	TG	(17:0/20:4/22:6)	(17:0)	(20:4)	(22:6)		C62 H104 O6 N1	958.786	19.0354	0.0246088	1.46493	0.223098	0.0974261	1.05736e+07	1.49e+07	2.57447e+07	6.5191e+06	1.97084e+07	4.26071e+06	1.58966e+07	2.81097e+07	1.48408e+07	7.35051e+06	1.02154e+07	1.24727e+07	8.59667e+06	8.24026e+06	8.24049e+06
1031POS		TG(20:1/18:1/20:1)+NH4	TG(58:3)+NH4	TG	(20:1/18:1/20:1)	(20:1)	(18:1)	(20:1)		C61 H116 O6 N1	958.88	22.9208	0.0179437	0.89817	0.536486	0.611564	3.77821e+08	3.32724e+08	2.85044e+08	2.36238e+08	3.26e+08	5.67047e+07	3.3474e+08	2.87129e+08	3.05301e+08	2.86812e+08	280661488	3.3189e+08	2.05611e+08	2.04062e+08	1.98679e+08
1032POS		TG(16:0/18:1/24:1)+NH4	TG(58:2)+NH4	TG	(16:0/18:1/24:1)	(16:0)	(18:1)	(24:1)		C61 H118 O6 N1	960.895	23.4392	0.0180638	0.661863	0.0497751	0.599368	1.81612e+08	1.57633e+08	125314029	1.71551e+08	2.75718e+08	2.86508e+07	1.61329e+08	1.13689e+08	1.32886e+08	1.83535e+08	1.70627e+08	151976441	1.03503e+08	1.00595e+08	1.0012e+08
1033POS		TG(16:0/18:1/24:0)+NH4	TG(58:1)+NH4	TG	(16:0/18:1/24:0)	(16:0)	(18:1)	(24:0)		C61 H120 O6 N1	962.911	23.9287	0.0174532	0.726629	0.0866959	0.305712	5.04434e+07	4.58642e+07	4.05896e+07	4.8722e+07	64433974	8.90777e+06	5.92209e+07	3.17842e+07	5.24705e+07	4.65479e+07	4.5504e+07	3.75235e+07	3.04918e+07	2.97245e+07	2.94953e+07
1034POS		TG(18:0e/20:1/22:6)+NH4	TG(60:7e)+NH4	TG	(18:0e/20:1/22:6)	(18:0e)	(20:1)	(22:6)		C63 H114 O5 N1	964.869	22.8169	0.0231461	1.90681	0.130365	0.124539	6.1686e+06	1.59635e+07	5.03834e+07	8.80872e+06	1.71747e+07	8.16812e+06	2.25866e+07	1.68524e+07	1.51585e+07	9.50833e+06	1.14917e+07	1.63011e+07	8.8545e+06	8.51864e+06	8.49965e+06
1035POS		TG(18:3/20:4/22:6)+NH4	TG(60:13)+NH4	TG	(18:3/20:4/22:6)	(18:3)	(20:4)	(22:6)		C63 H100 O6 N1	966.755	16.6295	0.0917301	1.24763	0.460421	0.199888	1.15247e+08	1.25505e+08	2.14753e+08	5.96114e+07	2.69623e+08	7.12703e+07	197965240	1.79052e+08	1.3307e+08	5.17072e+07	1.00438e+08	1.21845e+08	3.36505e+07	3.9262e+07	33592890
1036POS		TG(20:5/18:2/22:6)+NH4	TG(60:13)+NH4	TG	(20:5/18:2/22:6)	(20:5)	(18:2)	(22:6)		C63 H100 O6 N1	966.755	16.3118	0.0107597	1.37943	0.285743	0.223292	7.71547e+07	87831744	163495646	4.90678e+07	2.17051e+08	6.88813e+07	2.08174e+08	1.36078e+08	9.52151e+07	5.10515e+07	1.37659e+08	2.00718e+08	45807825	4.56258e+07	4.48848e+07
1037POS		TG(20:0e/18:1/22:5)+NH4	TG(60:6e)+NH4	TG	(20:0e/18:1/22:5)	(20:0e)	(18:1)	(22:5)		C63 H116 O5 N1	966.885	23.0339	0.123228	1.58283	0.0509708	0.0908438	4.85984e+06	1.78715e+07	2.1654e+07	9.41424e+06	1.29711e+07	5.37014e+06	2.12463e+07	1.4871e+07	1.08342e+07	1.15701e+07	1.2288e+07	1.70234e+07	9.61059e+06	1.17061e+07	9.43615e+06
1038POS		TG(20:0e/18:0/22:6)+NH4	TG(60:6e)+NH4	TG	(20:0e/18:0/22:6)	(20:0e)	(18:0)	(22:6)		C63 H116 O5 N1	966.885	23.408	0.0691473	1.64162	0.294395	0.0673184	6.59819e+06	7.4595e+06	4.27781e+07	1.07371e+07	1.76997e+07	5.3105e+06	2.67535e+07	1.14491e+07	1.06903e+07	1.15216e+07	6.49614e+06	1.08912e+07	7.16869e+06	7.15461e+06	6.33694e+06
1039POS		TG(18:2/20:4/22:6)+NH4	TG(60:12)+NH4	TG	(18:2/20:4/22:6)	(18:2)	(20:4)	(22:6)		C63 H102 O6 N1	968.77	16.7836	0.12332	1.99239	0.158265	0.18764	1.91463e+07	2.20439e+07	3.1496e+07	1.98686e+07	3.70421e+07	2.00093e+07	1.12702e+08	2.92063e+07	1.91223e+07	1.88236e+07	2.20661e+07	5.56449e+07	2.01562e+07	1.66015e+07	1.62016e+07
103POS		Cer(d34:0+pO)+H	Cer(d34:0+pO)+H	Cer	(d34:0+pO)	(d34:0+pO)				C34 H70 O4 N1	556.53	8.60063	0.0902546	1.41569	0.0148893	0.070155	8.54876e+06	1.3412e+07	1.02382e+07	6.05974e+06	1.18966e+07	1.18248e+07	1.51214e+07	1.24874e+07	8.44239e+06	6.79336e+06	1.25383e+07	1.37584e+07	6.45586e+06	5.54707e+06	5.53679e+06
1040POS		TG(18:2/20:4/22:6)+NH4	TG(60:12)+NH4	TG	(18:2/20:4/22:6)	(18:2)	(20:4)	(22:6)		C63 H102 O6 N1	968.77	17.2677	0.040042	1.67126	0.100399	0.736848	2.97433e+08	4.44883e+08	8.7384e+08	2.27013e+08	8.31309e+08	2.6457e+08	8.13463e+08	7.78128e+08	4.78664e+08	7.51195e+07	4.69294e+08	8.00771e+08	2.3215e+08	2.17153e+08	2.16394e+08
1041POS		TG(16:0/22:6/22:6)+NH4	TG(60:12)+NH4	TG	(16:0/22:6/22:6)	(16:0)	(22:6)	(22:6)		C63 H102 O6 N1	968.77	17.8455	0.0361234	1.29508	0.385922	0.683162	1613726631	1276780676	2780023268	7.94315e+08	3399660821	9.87877e+08	2074484178	2801936162	1639405852	7.28608e+08	1145269515	2150292000	8.9404e+08	8.94524e+08	8.39474e+08
1042POS		TG(20:0p/20:0/20:4)+NH4	TG(60:4p)+NH4	TG	(20:0p/20:0/20:4)	(20:0p)	(20:0)	(20:4)		C63 H118 O5 N1	968.9	23.586	0.0129902	1.80534	0.210795	0.102179	5.65213e+06	1.28086e+07	2.33416e+07	6.81021e+06	1.14689e+07	4.39892e+06	4.53403e+07	1.35077e+07	8.96793e+06	7.03256e+06	2.40804e+07	1.61667e+07	6.63479e+06	6.52521e+06	6.46747e+06
1043POS		TG(18:1/20:4/22:6)+NH4	TG(60:11)+NH4	TG	(18:1/20:4/22:6)	(18:1)	(20:4)	(22:6)		C63 H104 O6 N1	970.786	18.3615	0.0122688	1.43489	0.150731	0.824873	1061011248	1292762343	1960551817	5.5834e+08	1825473379	6.05751e+08	1325838395	1905411291	1101537032	5.27501e+08	9.2685e+08	1520048757	7.55712e+08	7.56303e+08	7.40064e+08
1044POS		TG(16:0/22:5/22:6)+NH4	TG(60:11)+NH4	TG	(16:0/22:5/22:6)	(16:0)	(22:5)	(22:6)		C63 H104 O6 N1	970.786	18.7266	0.0307806	2.15408	0.0208643	0.512242	1.06058e+08	2.1724e+08	2.42473e+08	6.55924e+07	161580716	9.42973e+07	1.85065e+08	344476914	9.50731e+07	5.76394e+07	7.62768e+07	1.27515e+08	1.21635e+08	1.15429e+08	1.15318e+08
1045POS		TG(20:0e/18:0/22:4)+NH4	TG(60:4e)+NH4	TG	(20:0e/18:0/22:4)	(20:0e)	(18:0)	(22:4)		C63 H120 O5 N1	970.916	23.9304	0.00780376	2.00735	0.0392097	0.0881306	3.70571e+06	7.72782e+06	1.16132e+07	2.79609e+06	6.73897e+06	2.08607e+06	1.3005e+07	8.18065e+06	4.88623e+06	4.12005e+06	2.11841e+06	6.2974e+06	3.4909e+06	3.49127e+06	3.44411e+06
1046POS		TG(20:0e/20:1/20:3)+NH4	TG(60:4e)+NH4	TG	(20:0e/20:1/20:3)	(20:0e)	(20:1)	(20:3)		C63 H120 O5 N1	970.916	23.616	0.0443445	2.30107	0.0136614	0.140151	4.22435e+06	1.59993e+07	2.2549e+07	3.77473e+06	8.30757e+06	3.63104e+06	1.55772e+07	1.32723e+07	6.78077e+06	6.00683e+06	7.01755e+06	1.20671e+07	6.47074e+06	6.98084e+06	6.47082e+06
1047POS		CerG2(d18:1/24:1)+H	CerG2(d42:2)+H	CerG2	(d18:1/24:1)	(d18:1)	(24:1)			C54 H102 O13 N1	972.735	12.694	0.029541	2.8101	0.00145937	0.336236	1.54908e+07	7.50148e+07	5.77317e+07	1.04012e+07	2.99576e+07	2.22024e+07	7.22756e+07	6.10747e+07	1.93631e+07	1.94024e+07	3.42503e+07	7.38258e+07	2.62131e+07	2.62397e+07	2.49072e+07
1048POS		TG(18:1/20:3/22:6)+NH4	TG(60:10)+NH4	TG	(18:1/20:3/22:6)	(18:1)	(20:3)	(22:6)		C63 H106 O6 N1	972.801	18.985	0.0204933	1.26331	0.213816	0.312637	2.96545e+08	4.39453e+08	4.42571e+08	1.596e+08	3.61387e+08	1.88807e+08	3.65083e+08	4.71017e+08	2.44391e+08	3.19538e+08	4.77129e+08	4.41048e+08	2.45901e+08	2.46094e+08	2.37369e+08
1049POS		TG(18:1/20:3/22:6)+NH4	TG(60:10)+NH4	TG	(18:1/20:3/22:6)	(18:1)	(20:3)	(22:6)		C63 H106 O6 N1	972.801	19.2932	0.0470435	1.75441	0.0366832	0.699293	2.99617e+08	511343304	5.82172e+08	1.70121e+08	5.07631e+08	1.86696e+08	5.07709e+08	726394609	3.02393e+08	1.73799e+08	2.43067e+08	4.62273e+08	3.13065e+08	289058917	2.88686e+08
104POS		PC(21:3e)+H	PC(21:3e)+H	PC	(21:3e)	(21:3e)				C29 H55 O7 N1 P1	560.371	4.962	0.0393815	2.21566	0.00218542	0.341079	3.0446e+07	6.18711e+07	1.07882e+08	1.21633e+07	4.72968e+07	7.01993e+07	6.28553e+07	7.50437e+07	4.52236e+07	3.67987e+07	4.98652e+07	1.13569e+08	2.9498e+07	3.15828e+07	2.95473e+07
1050POS		TG(18:0/20:4/22:6)+NH4	TG(60:10)+NH4	TG	(18:0/20:4/22:6)	(18:0)	(20:4)	(22:6)		C63 H106 O6 N1	972.801	19.6602	0.0111315	0.732182	0.0877203	0.740904	2.94392e+08	2.10276e+08	4.23788e+08	3.66611e+08	4.37524e+08	2.56579e+08	2.16994e+08	290545114	331582623	3.94861e+08	2.55653e+08	1.25212e+08	2.26295e+08	2.21989e+08	2.21986e+08
1051POS		CerG2(d18:1/24:0)+H	CerG2(d42:1)+H	CerG2	(d18:1/24:0)	(d18:1)	(24:0)			C54 H104 O13 N1	974.75	13.9141	0.0159472	2.35851	0.00219212	0.228866	1.38762e+07	4.5374e+07	3.00524e+07	9.60093e+06	1.71514e+07	1.72303e+07	4.23954e+07	3.6141e+07	1.29344e+07	1.44689e+07	2.49143e+07	4.80211e+07	1.75954e+07	1.7426e+07	1.70542e+07
1052POS		TG(18:1/20:4/22:4)+NH4	TG(60:9)+NH4	TG	(18:1/20:4/22:4)	(18:1)	(20:4)	(22:4)		C63 H108 O6 N1	974.817	19.596	0.293301	1.13951	0.539623	0.214476	3.07063e+08	5.05538e+08	2.116e+08	3.10066e+08	2.64337e+08	2.57239e+08	2.00912e+08	1.87333e+08	2.40585e+08	1.73874e+08	2.01326e+08	3.43514e+08	1.55841e+08	2.68727e+08	2.80959e+08
1053POS		TG(18:0/20:4/22:5)+NH4	TG(60:9)+NH4	TG	(18:0/20:4/22:5)	(18:0)	(20:4)	(22:5)		C63 H108 O6 N1	974.817	20.1124	0.0228897	0.672998	0.310411	0.613844	5.82809e+08	2.10465e+08	3.05606e+08	1.54558e+08	7.98103e+08	1.30017e+08	2.57006e+08	2.99303e+08	2.81596e+08	1.72534e+08	1.97182e+08	2.69303e+08	1.55517e+08	1.49534e+08	149485305
1054POS		TG(18:1/20:2/22:6)+NH4	TG(60:9)+NH4	TG	(18:1/20:2/22:6)	(18:1)	(20:2)	(22:6)		C63 H108 O6 N1	974.817	19.1313	0.0221631	1.1006	0.545695	0.183532	2.58829e+08	2.94891e+08	2.9814e+08	1.60032e+08	2.94003e+08	1.69665e+08	1.75663e+08	2.15687e+08	2.43054e+08	1.43606e+08	1.7045e+08	2.43687e+08	1.69896e+08	1.63512e+08	1.63561e+08
1055POS		TG(20:2/18:2/22:5)+NH4	TG(60:9)+NH4	TG	(20:2/18:2/22:5)	(20:2)	(18:2)	(22:5)		C63 H108 O6 N1	974.817	18.8404	0.00776925	0.947053	0.643979	0.705078	5.25486e+08	6.04982e+08	5.49023e+08	5.10032e+08	4.50723e+08	5.71965e+08	320477976	3.58741e+08	5.14399e+08	5.01672e+08	4.24328e+08	3.66492e+08	4.16714e+08	4.11124e+08	4.167e+08
1056POS		TG(18:0/20:4/22:5)+NH4	TG(60:9)+NH4	TG	(18:0/20:4/22:5)	(18:0)	(20:4)	(22:5)		C63 H108 O6 N1	974.817	20.5577	0.010851	1.27681	0.267478	0.149983	4.1916e+07	6.55686e+07	8.42105e+07	3.08939e+07	8.17621e+07	3.0056e+07	5.36733e+07	7.88828e+07	4.52072e+07	3.8167e+07	4.3496e+07	4.69557e+07	4.34186e+07	4.26186e+07	4.34405e+07
1057POS		TG(18:1/18:1/23:0)+NH4	TG(59:2)+NH4	TG	(18:1/18:1/23:0)	(18:1)	(18:1)	(23:0)		C62 H120 O6 N1	974.911	23.6988	0.0276402	0.555295	0.072685	0.193612	1.4816e+07	1.37968e+07	1.00206e+07	1.55281e+07	3.87847e+07	2.85872e+06	1.19949e+07	1.11693e+07	1.39743e+07	1.63914e+07	1.61367e+07	1.4369e+07	7.81661e+06	7.46804e+06	7.44134e+06
1058POS		TG(20:1/18:1/22:6)+NH4	TG(60:8)+NH4	TG	(20:1/18:1/22:6)	(20:1)	(18:1)	(22:6)		C63 H110 O6 N1	976.833	21.0066	0.0202669	1.2154	0.264772	0.289763	2.55123e+08	3.13519e+08	3.64365e+08	1.69886e+08	3.13397e+08	1.16067e+08	2.94542e+08	3.67378e+08	2.66523e+08	2.14946e+08	2.01362e+08	2.71506e+08	2.12977e+08	2.05758e+08	2.05589e+08
1059POS		TG(16:0/22:4/22:4)+NH4	TG(60:8)+NH4	TG	(16:0/22:4/22:4)	(16:0)	(22:4)	(22:4)		C63 H110 O6 N1	976.833	20.2535	0.0421505	1.42264	0.0798569	0.38811	2.72127e+08	4.07428e+08	4.11344e+08	1.78061e+08	4.61189e+08	2.14573e+08	3.63797e+08	5.43947e+08	3.181e+08	2.08187e+08	2.71726e+08	4.90758e+08	2.84187e+08	3.04521e+08	2.82545e+08
105POS		LPC(20:0e)+Na	LPC(20:0e)+Na	LPC	(20:0e)	(20:0e)				C28 H60 O6 N1 P1 Na1	560.405	6.34156	0.0250868	3.79393	0.000984754	0.109389	674147	2.10297e+06	6.92681e+06	572955	2.2751e+06	5.54884e+06	3.77795e+06	4.2862e+06	1.3616e+06	796199	1.86969e+06	6.00025e+06	1.88387e+06	1.87973e+06	1.80128e+06
1060POS		TG(25:0/16:0/18:1)+NH4	TG(59:1)+NH4	TG	(25:0/16:0/18:1)	(25:0)	(16:0)	(18:1)		C62 H122 O6 N1	976.927	24.1243	0.0141356	0.647139	0.0401351	0.106025	5.57265e+06	4.55121e+06	2.93513e+06	4.16066e+06	7.70756e+06	961753	4.28324e+06	3.24632e+06	5.43379e+06	3.98548e+06	4.75883e+06	4.48422e+06	2.9236e+06	2.87051e+06	2.84362e+06
1061POS		TG(18:0/20:3/22:4)+NH4	TG(60:7)+NH4	TG	(18:0/20:3/22:4)	(18:0)	(20:3)	(22:4)		C63 H112 O6 N1	978.848	21.2339	0.211275	1.54527	0.228196	0.427643	2.01871e+08	321580588	2.98378e+08	1.6206e+08	6.26518e+08	2.4445e+08	6.60078e+08	3.29133e+08	1.98439e+08	7.9804e+07	1.49455e+08	337801044	2.22062e+08	3.26535e+08	3.32253e+08
1062POS		TG(20:1/18:1/22:4)+NH4	TG(60:6)+NH4	TG	(20:1/18:1/22:4)	(20:1)	(18:1)	(22:4)		C63 H114 O6 N1	980.864	21.8965	0.0348883	1.65383	0.0737549	0.439029	187702017	4.85635e+08	3.09433e+08	1.2301e+08	2.43589e+08	7.76219e+07	2.79121e+08	3.11785e+08	1.7253e+08	2.33274e+08	1.01468e+08	2.92064e+08	1.77733e+08	1.88155e+08	1.76777e+08
1063POS		TG(17:0/22:6/22:6)+NH4	TG(61:12)+NH4	TG	(17:0/22:6/22:6)	(17:0)	(22:6)	(22:6)		C64 H104 O6 N1	982.786	17.8663	0.0186056	1.25272	0.227727	0.0333915	1.47442e+07	1.44213e+07	1.53798e+07	7.32839e+06	1.80466e+07	8.4275e+06	1.24805e+07	1.57009e+07	9.41347e+06	7.58348e+06	1.03827e+07	1.81472e+07	6.51584e+06	6.51888e+06	6.30958e+06
1064POS		TG(18:1/18:2/24:2)+NH4	TG(60:5)+NH4	TG	(18:1/18:2/24:2)	(18:1)	(18:2)	(24:2)		C63 H116 O6 N1	982.88	22.1716	0.0154732	0.956724	0.77025	0.234918	5.94368e+07	6.48498e+07	58948416	4.20053e+07	6.17692e+07	1.83221e+07	5.92183e+07	6.04085e+07	5.86418e+07	4.83759e+07	5.15513e+07	4.61077e+07	2.87193e+07	2.816e+07	2.78579e+07
1065POS		TG(18:1/18:2/24:2)+NH4	TG(60:5)+NH4	TG	(18:1/18:2/24:2)	(18:1)	(18:2)	(24:2)		C63 H116 O6 N1	982.88	22.5523	0.0265521	1.38898	0.32874	0.22039	4.49017e+07	1.30738e+08	1.21277e+08	3.5815e+07	7.34218e+07	1.55475e+07	1.32531e+08	3.60674e+07	6.0314e+07	4.94874e+07	9.97249e+07	6.89608e+07	4.34733e+07	43496263	4.15152e+07
1066POS		TG(18:0/20:4/22:1)+NH4	TG(60:5)+NH4	TG	(18:0/20:4/22:1)	(18:0)	(20:4)	(22:1)		C63 H116 O6 N1	982.88	22.8897	0.0197744	0.606436	0.135696	0.342309	4.86036e+07	4.471e+07	4.40532e+07	3.41646e+07	5.69097e+07	1.03673e+07	5.697e+07	4.27861e+07	7.05406e+07	1.35882e+08	5.12221e+07	4.20644e+07	2.86881e+07	2.77606e+07	2.76973e+07
1067POS		TG(18:1/18:2/24:1)+NH4	TG(60:4)+NH4	TG	(18:1/18:2/24:1)	(18:1)	(18:2)	(24:1)		C63 H118 O6 N1	984.895	22.9391	0.0257267	0.971033	0.899222	0.287444	8.09468e+07	1.11639e+08	9.58169e+07	5.16689e+07	1.43943e+08	1.90356e+07	1.18412e+08	9.15611e+07	1.25989e+08	7.10612e+07	7.90589e+07	1.00194e+08	5.85252e+07	5.60354e+07	5.59518e+07
1068POS		TG(18:0/20:4/22:0)+NH4	TG(60:4)+NH4	TG	(18:0/20:4/22:0)	(18:0)	(20:4)	(22:0)		C63 H118 O6 N1	984.895	23.3178	0.0144026	0.723761	0.0926573	0.174051	1.48949e+07	1.3627e+07	1.19399e+07	1.30846e+07	1.82706e+07	3.1385e+06	2.05587e+07	1.11669e+07	1.75437e+07	1.62634e+07	1.91984e+07	1.14062e+07	8.71339e+06	8.50743e+06	8.49251e+06
1069POS		TG(18:1/18:1/24:1)+NH4	TG(60:3)+NH4	TG	(18:1/18:1/24:1)	(18:1)	(18:1)	(24:1)		C63 H120 O6 N1	986.911	23.4131	0.0209179	1.28674	0.284892	0.184842	4.66339e+07	8.09786e+07	6.90125e+07	3.26201e+07	6.76973e+07	1.08308e+07	8.81082e+07	5.96843e+07	5.71092e+07	3.8316e+07	4.80176e+07	6.50463e+07	4.16435e+07	4.01895e+07	40151709
106POS		WE(20:1/18:0)+H	WE(38:1)+H	WE	(20:1/18:0)	(20:1)	(18:0)			H75 C38 O2	563.576	24.058	0.0257059	1.23071	0.39185	0.0114941	2.65621e+06	1.56727e+06	2.91321e+06	1.26347e+06	1.74669e+06	1.09866e+06	1.7924e+06	1.98255e+06	1.34839e+06	1.87618e+06	1.86525e+06	3.88367e+06	1.3795e+06	1.32347e+06	1.31677e+06
1070POS		TG(18:1/18:1/24:0)+NH4	TG(60:2)+NH4	TG	(18:1/18:1/24:0)	(18:1)	(18:1)	(24:0)		C63 H122 O6 N1	988.927	23.9128	0.0175352	0.719067	0.189515	0.331664	5.32596e+07	6.31173e+07	5.42414e+07	5.75046e+07	1.23407e+08	1.14569e+07	7.43041e+07	4.28973e+07	6.08807e+07	6.31672e+07	6.13461e+07	5.56784e+07	3.58872e+07	3.48808e+07	34765929
1071POS		TG(18:3/22:6/22:6)+NH4	TG(62:15)+NH4	TG	(18:3/22:6/22:6)	(18:3)	(22:6)	(22:6)		C65 H100 O6 N1	990.755	15.9278	0.0436447	1.59706	0.0780308	0.144146	1.62472e+07	2.22335e+07	4.05446e+07	1.3338e+07	4.34767e+07	1.88692e+07	4.21083e+07	3.60467e+07	1.84304e+07	1.27019e+07	1.72001e+07	3.40715e+07	7.99921e+06	7.41099e+06	8.00268e+06
1072POS		TG(62:8e)+NH4	TG(62:8e)+NH4	TG	(62:8e)	(62:8e)				C65 H116 O5 N1	990.885	22.766	0.0542241	1.92211	0.19394	0.090418	3.21757e+06	1.25916e+07	1.56206e+07	2.09912e+06	4.942e+06	5.28574e+06	3.36642e+06	1.48911e+06	3.88986e+06	3.05277e+06	4.45192e+06	3.26633e+06	2.90553e+06	3.13926e+06	3.2306e+06
1073POS		TG(18:0/18:1/24:0)+NH4	TG(60:1)+NH4	TG	(18:0/18:1/24:0)	(18:0)	(18:1)	(24:0)		C63 H124 O6 N1	990.942	24.3188	0.0169346	0.865435	0.49449	0.121182	1.1532e+07	1.27524e+07	1.18798e+07	9.91394e+06	1.82996e+07	2.85105e+06	1.75972e+07	8.66532e+06	1.23263e+07	1.08794e+07	1.11255e+07	1.03628e+07	7.75608e+06	7.76635e+06	7.53595e+06
1074POS		TG(20:4/20:4/22:6)+NH4	TG(62:14)+NH4	TG	(20:4/20:4/22:6)	(20:4)	(20:4)	(22:6)		C65 H102 O6 N1	992.77	16.7543	0.013684	0.866387	0.508641	0.645312	5.32819e+08	3.55273e+08	837820254	4.40569e+08	1100586037	4.71814e+08	5.28551e+08	4.2818e+08	6.33716e+08	4.47713e+08	6.31088e+08	6.58927e+08	2.69635e+08	269934812	2.63446e+08
1075POS		TG(62:6p)+NH4	TG(62:6p)+NH4	TG	(62:6p)	(62:6p)				C65 H118 O5 N1	992.9	23.339	0.0691698	2.37774	0.0632895	0.112121	3.33805e+06	9.20303e+06	2.7815e+07	4.58301e+06	7.18425e+06	4.31289e+06	1.57409e+07	9.52006e+06	6.43049e+06	5.9711e+06	4.01314e+06	8.35464e+06	4.42922e+06	3.93357e+06	4.46068e+06
1076POS		TG(18:1/22:6/22:6)+NH4	TG(62:13)+NH4	TG	(18:1/22:6/22:6)	(18:1)	(22:6)	(22:6)		C65 H104 O6 N1	994.786	17.8151	0.0149494	1.10922	0.597826	0.185034	4.11242e+08	4.12256e+08	6.20403e+08	2.77074e+08	6.68327e+08	2.72942e+08	3.81843e+08	3.99591e+08	4.02201e+08	2.61665e+08	3.1573e+08	5.04361e+08	2.04745e+08	1.99748e+08	1.99341e+08
1077POS		TG(22:5/18:2/22:6)+NH4	TG(62:13)+NH4	TG	(22:5/18:2/22:6)	(22:5)	(18:2)	(22:6)		C65 H104 O6 N1	994.786	17.2289	0.0211569	1.88662	0.045238	0.437943	9.10947e+07	1.22223e+08	2.40578e+08	5.67543e+07	1.80718e+08	7.75689e+07	2.32492e+08	1.75017e+08	1.12933e+08	5.55432e+07	1.17152e+08	310873532	5.82103e+07	5.81954e+07	5.60958e+07
1078POS		TG(22:5/18:2/22:6)+NH4	TG(62:13)+NH4	TG	(22:5/18:2/22:6)	(22:5)	(18:2)	(22:6)		C65 H104 O6 N1	994.786	16.686	0.0119065	1.25327	0.327662	0.0915609	4.97432e+07	6.51984e+07	7.76878e+07	3.29238e+07	9.4421e+07	3.7323e+07	7.31032e+07	5.74784e+07	4.96641e+07	2.42404e+07	3.7222e+07	5.04195e+07	1.63084e+07	1.6305e+07	1.59727e+07
1079POS		TG(20:0e/20:1/22:5)+NH4	TG(62:6e)+NH4	TG	(20:0e/20:1/22:5)	(20:0e)	(20:1)	(22:5)		C65 H120 O5 N1	994.916	23.3927	0.0204565	2.39314	0.0955534	0.122029	3.26218e+06	1.23187e+07	3.37588e+07	4.6816e+06	7.64602e+06	3.52286e+06	1.32076e+07	9.94222e+06	7.2928e+06	5.41442e+06	5.87012e+06	9.01682e+06	4.54586e+06	4.55321e+06	4.39034e+06
107POS		DG(33:1p)+H	DG(33:1p)+H	DG	(33:1p)	(33:1p)				C36 H69 O4	565.519	22.116	0.0335808	1.74307	0.0913764	0.117686	1.23985e+07	1.18e+07	1.06551e+07	5.60813e+06	1.21957e+07	2.93102e+06	2.13746e+07	2.00756e+07	7.73827e+06	3.68161e+06	6.07077e+06	1.6296e+07	1.20123e+07	1.13754e+07	1.13087e+07
1080POS		TG(18:1/22:5/22:6)+NH4	TG(62:12)+NH4	TG	(18:1/22:5/22:6)	(18:1)	(22:5)	(22:6)		C65 H106 O6 N1	996.801	18.2709	0.021745	1.5477	0.0157936	0.309169	1.36287e+08	1.85699e+08	2.2145e+08	8.38681e+07	1.71106e+08	1.42118e+08	1.34797e+08	1.6141e+08	1.25149e+08	6.48757e+07	1.01979e+08	2.12014e+08	9.59615e+07	9.24752e+07	9.23976e+07
1081POS		TG(22:5/18:2/22:5)+NH4	TG(62:12)+NH4	TG	(22:5/18:2/22:5)	(22:5)	(18:2)	(22:5)		C65 H106 O6 N1	996.801	17.8365	0.00757551	0.831368	0.310354	0.665115	5.71108e+08	3.88042e+08	585018481	4.10373e+08	7.79339e+08	4.56217e+08	3.13661e+08	4.10814e+08	5.70827e+08	345394179	3.43485e+08	3.57418e+08	2.72309e+08	2.72366e+08	2.6878e+08
1082POS		TG(18:1/22:5/22:6)+NH4	TG(62:12)+NH4	TG	(18:1/22:5/22:6)	(18:1)	(22:5)	(22:6)		C65 H106 O6 N1	996.801	18.6237	0.0173646	1.41448	0.232635	0.206283	1.08219e+08	1.4952e+08	1.2345e+08	4.65898e+07	1.48188e+08	6.17844e+07	7.56462e+07	1.7962e+08	8.75462e+07	3.86938e+07	4.72598e+07	8.39763e+07	6.98284e+07	6.98238e+07	6.77469e+07
1083POS		TG(18:0/22:6/22:6)+NH4	TG(62:12)+NH4	TG	(18:0/22:6/22:6)	(18:0)	(22:6)	(22:6)		C65 H106 O6 N1	996.801	19.1455	0.0161693	1.35608	0.344572	0.167566	9.2511e+07	8.46562e+07	2.24828e+08	5.76988e+07	2.17842e+08	6.77552e+07	1.27429e+08	1.66517e+08	9.70926e+07	5.36708e+07	5.98646e+07	1.1355e+08	6.82497e+07	6.69638e+07	6.6093e+07
1084POS		TG(16:0e/22:4/24:1)+NH4	TG(62:5e)+NH4	TG	(16:0e/22:4/24:1)	(16:0e)	(22:4)	(24:1)		C65 H122 O5 N1	996.932	23.8548	0.0180991	1.08666	0.864535	0.0342654	1.21439e+06	3.65101e+06	7.41709e+06	2.15685e+06	1.39645e+07	1.31374e+06	7.48736e+06	4.50815e+06	2.86435e+06	3.73458e+06	2.38397e+06	4.22218e+06	1.97263e+06	1.97318e+06	1.9117e+06
1085POS		TG(18:1/22:5/22:5)+NH4	TG(62:11)+NH4	TG	(18:1/22:5/22:5)	(18:1)	(22:5)	(22:5)		C65 H108 O6 N1	998.817	18.3871	0.00606826	0.96569	0.791298	0.36196	2.15785e+08	2.017e+08	2.37242e+08	1.76349e+08	2.34064e+08	2.19517e+08	1.56636e+08	1.46971e+08	2.28274e+08	1.53256e+08	1.33372e+08	1.39882e+08	1.39818e+08	1.4082e+08	1.39132e+08
1086POS		TG(18:1/22:5/22:5)+NH4	TG(62:11)+NH4	TG	(18:1/22:5/22:5)	(18:1)	(22:5)	(22:5)		C65 H108 O6 N1	998.817	19.3983	0.154447	1.35875	0.307984	0.3486	1.68197e+08	4.58558e+08	2.306e+08	1.19025e+08	3.12759e+08	1.39694e+08	1.40982e+08	2.20552e+08	165566783	1.1129e+08	143307344	1.95738e+08	2.01946e+08	1.52875e+08	2.03313e+08
1087POS		TG(16:0e/22:4/24:0)+NH4	TG(62:4e)+NH4	TG	(16:0e/22:4/24:0)	(16:0e)	(22:4)	(24:0)		C65 H124 O5 N1	998.947	24.324	0.0882171	2.35442	0.02471	0.0628931	807024	3.32195e+06	6.1546e+06	1.2273e+06	1.78185e+06	730164	4.90038e+06	2.93185e+06	1.74827e+06	1.96378e+06	1.52679e+06	3.28036e+06	1.56196e+06	1.35935e+06	1.33348e+06
1088POS		TG(25:0/18:1/18:2)+NH4	TG(61:3)+NH4	TG	(25:0/18:1/18:2)	(25:0)	(18:1)	(18:2)		C64 H122 O6 N1	1000.93	23.7124	0.0148684	0.633105	0.0907628	0.0947598	4.09106e+06	3.59716e+06	3.26478e+06	3.73374e+06	8.95632e+06	881550	3.44966e+06	2.97625e+06	4.35508e+06	3.57905e+06	4.71377e+06	4.46228e+06	2.0769e+06	2.02581e+06	2.02294e+06
1089POS		TG(18:0/22:4/22:5)+NH4	TG(62:9)+NH4	TG	(18:0/22:4/22:5)	(18:0)	(22:4)	(22:5)		C65 H112 O6 N1	1002.85	21.0513	0.0227243	0.846839	0.399057	0.243279	6.94056e+07	6.12239e+07	6.52982e+07	3.79788e+07	9.92222e+07	3.46047e+07	4.56863e+07	5.35186e+07	5.41452e+07	4.71801e+07	8.84672e+07	7.53547e+07	4.00072e+07	3.84794e+07	3.84662e+07
108POS		LPC(20:4)+Na	LPC(20:4)+Na	LPC	(20:4)	(20:4)				C28 H50 O7 N1 P1 Na1	566.322	2.3204	0.0164914	1.13883	0.177225	0.332847	1.95734e+08	2.10138e+08	2.28579e+08	1.57157e+08	2.5732e+08	2.67041e+08	1.76134e+08	2.38892e+08	1.91466e+08	1.71098e+08	2.07349e+08	2.23182e+08	2.43336e+08	2.43381e+08	2.36473e+08
1090POS		TG(25:0/18:1/18:1)+NH4	TG(61:2)+NH4	TG	(25:0/18:1/18:1)	(25:0)	(18:1)	(18:1)		C64 H124 O6 N1	1002.94	24.1085	0.0288038	0.49098	0.0892207	0.112725	5.12803e+06	4.90305e+06	2.89917e+06	5.15261e+06	1.52992e+07	889024	3.67503e+06	3.36878e+06	4.21789e+06	5.2636e+06	5.15871e+06	4.01217e+06	2.41101e+06	2.29697e+06	2.29236e+06
1091POS		TG(16:0/22:6/24:1)+NH4	TG(62:7)+NH4	TG	(16:0/22:6/24:1)	(16:0)	(22:6)	(24:1)		C65 H116 O6 N1	1006.88	22.507	0.013209	0.810127	0.172532	0.209666	2.85012e+07	2.53374e+07	2.9091e+07	2.3945e+07	3.00355e+07	6.48568e+06	2.87345e+07	2.44268e+07	3.25569e+07	2.69431e+07	2.64996e+07	2.24158e+07	1.57525e+07	1.54044e+07	1.5391e+07
1092POS		TG(26:1/18:1/18:2)+NH4	TG(62:4)+NH4	TG	(26:1/18:1/18:2)	(26:1)	(18:1)	(18:2)		C65 H122 O6 N1	1012.93	23.4054	0.0749388	1.40706	0.222873	0.143709	1.89252e+07	4.5181e+07	4.0683e+07	1.35181e+07	2.61874e+07	4.39074e+06	3.51891e+07	2.31839e+07	2.17904e+07	1.86916e+07	2.25095e+07	2.25014e+07	1.5955e+07	1.71565e+07	1.47646e+07
1093POS		TG(18:0/20:4/24:0)+NH4	TG(62:4)+NH4	TG	(18:0/20:4/24:0)	(18:0)	(20:4)	(24:0)		C65 H122 O6 N1	1012.93	23.8419	0.0149413	1.11232	0.679881	0.0568532	4.69195e+06	7.61518e+06	6.85835e+06	4.07921e+06	7.59929e+06	1.38727e+06	1.1827e+07	5.42745e+06	5.9488e+06	5.31706e+06	6.46762e+06	4.81937e+06	3.65523e+06	3.59204e+06	3.54829e+06
1094POS		TG(20:4/22:6/22:6)+NH4	TG(64:16)+NH4	TG	(20:4/22:6/22:6)	(20:4)	(22:6)	(22:6)		C67 H102 O6 N1	1016.77	16.3453	0.0301041	1.44872	0.233921	0.0932648	1.24799e+07	1.53321e+07	3.90692e+07	9.53918e+06	4.31455e+07	1.70093e+07	2.47711e+07	3.01008e+07	1.64288e+07	1.11529e+07	1.38753e+07	2.81822e+07	7.28368e+06	7.29005e+06	6.91344e+06
1095POS		TG(26:0/18:1/18:1)+NH4	TG(62:2)+NH4	TG	(26:0/18:1/18:1)	(26:0)	(18:1)	(18:1)		C65 H126 O6 N1	1016.96	24.2813	0.0171605	0.780625	0.253987	0.117695	9.90046e+06	9.00136e+06	8.47085e+06	6.78574e+06	1.43578e+07	1.77802e+06	1.04468e+07	6.14955e+06	8.26666e+06	7.71468e+06	8.08315e+06	7.17254e+06	5.15357e+06	5.12414e+06	4.98975e+06
1096POS		TG(20:3/22:6/22:6)+NH4	TG(64:15)+NH4	TG	(20:3/22:6/22:6)	(20:3)	(22:6)	(22:6)		C67 H104 O6 N1	1018.79	16.8304	0.0160612	1.48162	0.266749	0.0995588	11330616	1.38147e+07	3.39784e+07	9.15446e+06	4.614e+07	1.588e+07	2.1438e+07	3.93583e+07	1.23494e+07	1.05282e+07	1.58782e+07	3.1665e+07	7.62989e+06	7.40606e+06	7.44135e+06
1097POS		TG(64:8e)+NH4	TG(64:8e)+NH4	TG	(64:8e)	(64:8e)				C67 H120 O5 N1	1018.92	23.2989	0.0218395	2.6436	0.0251487	0.101005	1.57435e+06	7.1558e+06	1.29979e+07	1.48902e+06	3.60783e+06	2.03241e+06	6.6177e+06	5.61557e+06	2.83157e+06	2.24381e+06	2.99554e+06	4.55288e+06	2.05621e+06	2.05832e+06	1.98043e+06
1098POS		TG(26:0/18:0/18:1)+NH4	TG(62:1)+NH4	TG	(26:0/18:0/18:1)	(26:0)	(18:0)	(18:1)		C65 H128 O6 N1	1018.97	24.6535	0.0340751	0.813743	0.333592	0.0494028	2.59599e+06	1.7762e+06	2.0204e+06	1.44844e+06	2.05592e+06	413156	2.18624e+06	1.03858e+06	1.85817e+06	1.31633e+06	1.60217e+06	1.41652e+06	1.20545e+06	1.13784e+06	1.13618e+06
1099POS		TG(22:4/20:4/22:6)+NH4	TG(64:14)+NH4	TG	(22:4/20:4/22:6)	(22:4)	(20:4)	(22:6)		C67 H106 O6 N1	1020.8	17.5415	0.0148947	1.45088	0.0980669	0.161288	3.91163e+07	6.47597e+07	6.80061e+07	2.36462e+07	5.41974e+07	2.26098e+07	4.08599e+07	5.45575e+07	3.68431e+07	1.89551e+07	3.38355e+07	4.89497e+07	1.7809e+07	1.77934e+07	1.73461e+07
10POS		WE(23:2)+NH4	WE(23:2)+NH4	WE	(23:2)	(23:2)				H46 C23 O2 N1	368.352	3.26675	0.0198473	2.38373	0.00391224	0.214952	7.61274e+06	1.93996e+07	4.16773e+07	5.74913e+06	2.29958e+07	1.98556e+07	3.14697e+07	3.1712e+07	8.02802e+06	1.67445e+07	1.61243e+07	4.00398e+07	1.10536e+07	1.10592e+07	1.06806e+07
1100POS		TG(64:5e)+NH4	TG(64:5e)+NH4	TG	(64:5e)	(64:5e)				C67 H126 O5 N1	1024.96	24.266	0.0291239	2.31298	0.0228745	0.0613128	713025	3.01677e+06	3.95402e+06	630001	1.59024e+06	620755	3.97959e+06	2.41762e+06	1.29548e+06	1.00796e+06	1.60777e+06	1.8424e+06	1.13732e+06	1.08373e+06	1.08008e+06
1101POS		TG(24:1/18:2/22:6)+NH4	TG(64:9)+NH4	TG	(24:1/18:2/22:6)	(24:1)	(18:2)	(22:6)		C67 H116 O6 N1	1030.88	21.825	0.0230422	1.01463	0.945704	0.0961658	6.64925e+06	1.30386e+07	1.35645e+07	5.87253e+06	1.3129e+07	3.06514e+06	9.42798e+06	1.11463e+07	9.25569e+06	9.72017e+06	1.26635e+07	7.88599e+06	5.73608e+06	5.51275e+06	5.51342e+06
1102POS		TG(18:1/22:6/24:1)+NH4	TG(64:8)+NH4	TG	(18:1/22:6/24:1)	(18:1)	(22:6)	(24:1)		C67 H118 O6 N1	1032.9	22.4823	0.0497692	1.11458	0.572051	0.054092	5.50385e+06	8.39863e+06	7.46677e+06	5.13657e+06	6.81567e+06	1.98094e+06	8.49166e+06	5.15345e+06	4.818e+06	5.12052e+06	5.3586e+06	5.01462e+06	4.70283e+06	4.3328e+06	4.30732e+06
1103POS		TG(27:0/18:0/18:0)+NH4	TG(63:0)+NH4	TG	(27:0/18:0/18:0)	(27:0)	(18:0)	(18:0)		C66 H132 O6 N1	1035	23.848	0.0137793	1.90523	0.0684286	0.0434034	1.35838e+06	2.73496e+06	4.97871e+06	1.0726e+06	926232	837240	1.67189e+06	2.58988e+06	1.44905e+06	1.59541e+06	1.45327e+06	2.15284e+06	1.49657e+06	1.46216e+06	1.4607e+06
1104POS		TG(26:1/18:0/20:4)+NH4	TG(64:5)+NH4	TG	(26:1/18:0/20:4)	(26:1)	(18:0)	(20:4)		C67 H124 O6 N1	1038.94	23.6467	0.0245929	1.01153	0.965839	0.0734639	4.87851e+06	9.56929e+06	1.09379e+07	3.69977e+06	1.21961e+07	1.69439e+06	7.81566e+06	6.00739e+06	6.51787e+06	5.70392e+06	1.061e+07	8.08431e+06	5.04246e+06	4.83017e+06	4.83721e+06
1105POS		TG(28:0/18:1/18:2)+NH4	TG(64:3)+NH4	TG	(28:0/18:1/18:2)	(28:0)	(18:1)	(18:2)		C67 H128 O6 N1	1042.97	24.2657	0.0102746	1.11325	0.733224	0.0321641	6.60491e+06	3293390	8.53639e+06	2.17955e+06	3.73228e+06	1.00332e+06	4.20818e+06	3.56654e+06	3.83455e+06	2.42395e+06	3.38462e+06	4.06154e+06	2.39914e+06	2.35851e+06	2.35553e+06
1106POS		TG(22:4/22:6/22:6)+NH4	TG(66:16)+NH4	TG	(22:4/22:6/22:6)	(22:4)	(22:6)	(22:6)		C69 H106 O6 N1	1044.8	17.286	0.0270927	1.99675	0.0666179	0.0814087	2.90183e+06	5.92655e+06	1.24439e+07	1.5993e+06	6.18995e+06	2.96813e+06	4.36448e+06	6.75961e+06	3.46447e+06	2.16936e+06	2.3706e+06	4.86761e+06	1.68965e+06	1.72166e+06	1.78201e+06
1107POS		TG(30:1/16:0/18:1)+NH4	TG(64:2)+NH4	TG	(30:1/16:0/18:1)	(30:1)	(16:0)	(18:1)		C67 H130 O6 N1	1044.99	24.6039	0.0197722	0.682497	0.382938	0.0679992	8.79161e+06	2.2957e+06	3.23442e+06	1.76163e+06	2.90151e+06	701300	2.54239e+06	2.27918e+06	2.92236e+06	1.58034e+06	2.13828e+06	2.66228e+06	1.8951e+06	1.89717e+06	1.83196e+06
1108POS		TG(30:0/16:0/18:1)+NH4	TG(64:1)+NH4	TG	(30:0/16:0/18:1)	(30:0)	(16:0)	(18:1)		C67 H132 O6 N1	1047	24.99	0.0164861	0.499006	0.259893	0.0505192	4.3374e+06	817498	979992	777607	980077	287376	729880	598122	1.1163e+06	528974	796896	847279	802903	825589	802032
1109POS		TG(29:0/18:1/18:2)+NH4	TG(65:3)+NH4	TG	(29:0/18:1/18:2)	(29:0)	(18:1)	(18:2)		C68 H130 O6 N1	1056.99	24.462	0.0776811	0.829221	0.676564	0.0372808	3.55194e+06	929678	1.59537e+06	451648	746508	311368	1.06324e+06	1.07125e+06	1.51668e+06	543688	919644	1.43905e+06	740857	844115	738948
110POS		Cer(d36:1)+H	Cer(d36:1)+H	Cer	(d36:1)	(d36:1)				C36 H72 O3 N1	566.551	13.1056	0.0316115	0.41154	0.0462608	0.222235	1.51574e+07	4.9535e+06	1.13447e+07	1.18525e+07	5.50512e+07	1.22944e+07	6.46996e+06	1.50663e+07	2.17041e+07	1.95948e+07	3.65257e+07	1.56705e+07	1.22003e+07	1.15729e+07	1.154e+07
1110POS		TG(29:0/18:1/18:1)+NH4	TG(65:2)+NH4	TG	(29:0/18:1/18:1)	(29:0)	(18:1)	(18:1)		C68 H132 O6 N1	1059	24.771	0.0335381	0.576482	0.39165	0.0504278	5.02817e+06	827461	1.19598e+06	610720	871514	242398	825377	1.00503e+06	1.42137e+06	498534	774551	1.21019e+06	854327	808483	804820
1111POS		TG(30:0/18:1/18:2)+NH4	TG(66:3)+NH4	TG	(30:0/18:1/18:2)	(30:0)	(18:1)	(18:2)		C69 H132 O6 N1	1071	24.6313	0.0177912	0.780966	0.612146	0.0909316	2.02654e+07	4.22607e+06	8.03618e+06	2.91402e+06	4.92555e+06	1.70142e+06	6.03211e+06	5.43399e+06	6.69426e+06	2.32247e+06	4.32847e+06	6.94142e+06	4.22171e+06	4.22492e+06	4.09453e+06
1112POS		TG(30:0/18:1/18:1)+NH4	TG(66:2)+NH4	TG	(30:0/18:1/18:1)	(30:0)	(18:1)	(18:1)		C69 H134 O6 N1	1073.02	24.9228	0.0193339	0.571042	0.405027	0.109056	2.45692e+07	4.05918e+06	5.59066e+06	2.89355e+06	4.02004e+06	1.28079e+06	4.27364e+06	3.99263e+06	6.17543e+06	1.9538e+06	3.82463e+06	5.60722e+06	3.95865e+06	3.83924e+06	3.82067e+06
1113POS		TG(66:1)+NH4	TG(66:1)+NH4	TG	(66:1)	(66:1)				C69 H136 O6 N1	1075.04	25.252	0.0587676	0.439278	0.250608	0.0529712	4.78898e+06	716033	922612	621600	760801	324263	448545	560558	1.24292e+06	503296	937519	917845	882780	798806	798461
1114POS		TG(25:1/18:1/24:2)+NH4	TG(67:4)+NH4	TG	(25:1/18:1/24:2)	(25:1)	(18:1)	(24:2)		C70 H132 O6 N1	1083	24.4491	0.0193701	0.962589	0.939002	0.0362035	3.90338e+06	688844	1.86527e+06	356419	732774	263278	1.14045e+06	1.69737e+06	1.44247e+06	404475	827749	1.72521e+06	774869	775454	749447
1115POS		TG(67:3)+NH4	TG(67:3)+NH4	TG	(67:3)	(67:3)				C70 H134 O6 N1	1085.02	24.7879	0.0311785	0.708491	0.551302	0.0667301	1.03653e+07	1.81021e+06	3.20461e+06	985399	1.91672e+06	641350	2.07102e+06	2.65143e+06	3.26505e+06	971424	1.84506e+06	3.32997e+06	1.90174e+06	1.80601e+06	1.79952e+06
1116POS		TG(67:2)+NH4	TG(67:2)+NH4	TG	(67:2)	(67:2)				C70 H136 O6 N1	1087.04	25.0658	0.0118582	0.52209	0.400566	0.0695856	1.0082e+07	1.35855e+06	1.92747e+06	770883	1.35587e+06	397430	1.22548e+06	1.61069e+06	2.39039e+06	651476	1.3471e+06	2.14589e+06	1.45674e+06	1.45121e+06	1.4247e+06
1117POS		TG(30:0/18:2/20:2)+NH4	TG(68:4)+NH4	TG	(30:0/18:2/20:2)	(30:0)	(18:2)	(20:2)		C71 H134 O6 N1	1097.02	24.62	0.0477059	0.86286	0.771871	0.0874844	2.1192e+07	3.6242e+06	9.61203e+06	2.41923e+06	5.62971e+06	2.11793e+06	5.5464e+06	5.60151e+06	6.94522e+06	1.31599e+06	4.45478e+06	9.70087e+06	4.34962e+06	4.35325e+06	4.00153e+06
1118POS		TG(68:3)+NH4	TG(68:3)+NH4	TG	(68:3)	(68:3)				C71 H136 O6 N1	1099.04	24.9267	0.0180343	0.613843	0.425939	0.156189	4.97637e+07	8.2575e+06	1.3501e+07	5.54419e+06	9.13313e+06	2.89006e+06	8.93817e+06	8.54619e+06	1.44631e+07	4.47844e+06	9.68777e+06	1.49976e+07	8.47487e+06	8.47691e+06	8.21386e+06
1119POS		TG(68:2)+NH4	TG(68:2)+NH4	TG	(68:2)	(68:2)				C71 H138 O6 N1	1101.05	25.2141	0.0147486	0.45245	0.338266	0.142442	3.8367e+07	3.87387e+06	6.64875e+06	3.17009e+06	4.74278e+06	1.58125e+06	3.60042e+06	4.89526e+06	9.01945e+06	2.46079e+06	5.32407e+06	7.94285e+06	5.55766e+06	5.42746e+06	5.41025e+06
1120POS		TG(69:5)+NH4	TG(69:5)+NH4	TG	(69:5)	(69:5)				C72 H134 O6 N1	1109.02	24.507	0.0298684	0.973737	0.940195	0.0355678	3.21961e+06	989937	1.87057e+06	618856	1.22577e+06	297056	1.2359e+06	1.4885e+06	1.52502e+06	835748	1.07655e+06	2.39632e+06	761582	758971	721676
1121POS		TG(27:1/18:1/24:2)+NH4	TG(69:4)+NH4	TG	(27:1/18:1/24:2)	(27:1)	(18:1)	(24:2)		C72 H136 O6 N1	1111.04	24.7755	0.0134854	0.83834	0.745167	0.0592834	9.30399e+06	1.71433e+06	3.70303e+06	809750	1.70075e+06	517339	2.00979e+06	2.68714e+06	3.06323e+06	859765	1.95352e+06	4.19946e+06	1.75378e+06	1.75353e+06	1.71302e+06
1122POS		TG(69:3)+NH4	TG(69:3)+NH4	TG	(69:3)	(69:3)				C72 H138 O6 N1	1113.05	25.0597	0.0181547	0.668042	0.537237	0.0738923	1.26383e+07	2.06896e+06	3.31389e+06	1.01062e+06	1.84589e+06	617094	2.19506e+06	2.5117e+06	3.48868e+06	877035	2.03212e+06	3.9185e+06	2.08263e+06	2.08369e+06	2.01834e+06
1123POS		TG(69:2)+NH4	TG(69:2)+NH4	TG	(69:2)	(69:2)				C72 H140 O6 N1	1115.07	25.3493	0.028901	0.476807	0.359918	0.0575167	6.54873e+06	797459	1.21138e+06	499912	805090	229338	628638	913603	1.53652e+06	433653	943638	1.35362e+06	994515	947005	945700
1124POS		TG(70:6)+NH4	TG(70:6)+NH4	TG	(70:6)	(70:6)				C73 H134 O6 N1	1121.02	24.485	0.026644	1.40133	0.23824	0.0255814	286865	2.49516e+06	1.62605e+06	705748	2.19125e+06	819925	1.64791e+06	1.19617e+06	1.75045e+06	934640	1.20115e+06	2.12236e+06	687664	658069	655806
1125POS		TG(70:4)+NH4	TG(70:4)+NH4	TG	(70:4)	(70:4)				C73 H138 O6 N1	1125.05	24.9277	0.0123334	0.721021	0.557787	0.135766	4.07099e+07	6.96596e+06	1.33304e+07	4.56376e+06	7.26319e+06	2.87327e+06	7.62387e+06	8.64204e+06	1.35243e+07	4.0836e+06	8.91422e+06	1.75676e+07	7.59366e+06	7.48081e+06	7.41042e+06
1126POS		TG(70:3)+NH4	TG(70:3)+NH4	TG	(70:3)	(70:3)				C73 H140 O6 N1	1127.07	25.1938	0.0181942	0.585749	0.446682	0.153292	4.92516e+07	7.3697e+06	1.09502e+07	4.37518e+06	7.41393e+06	2.28884e+06	6.6923e+06	7.12004e+06	1.26978e+07	3.48248e+06	7.33845e+06	15109489	7.58068e+06	7.37758e+06	7.3247e+06
1127POS		TG(70:2)+NH4	TG(70:2)+NH4	TG	(70:2)	(70:2)				C73 H142 O6 N1	1129.08	25.476	0.0186279	0.418427	0.304403	0.102994	1.89501e+07	1.93949e+06	2.76987e+06	1.62363e+06	2.32718e+06	807124	1.57996e+06	1.95078e+06	4.34335e+06	1.26345e+06	2.94186e+06	4.11215e+06	2.73302e+06	2.73274e+06	2.64564e+06
1128POS		TG(71:4)+NH4	TG(71:4)+NH4	TG	(71:4)	(71:4)				C74 H140 O6 N1	1139.07	25.0703	0.0129646	0.723531	0.588013	0.0506401	6.02549e+06	1.10298e+06	1.93766e+06	504644	897290	310384	1.03959e+06	1.2895e+06	2.01126e+06	532670	1.1217e+06	2.34605e+06	1.10713e+06	1.10742e+06	1.0826e+06
1129POS		TG(71:3)+NH4	TG(71:3)+NH4	TG	(71:3)	(71:3)				C74 H142 O6 N1	1141.08	25.3406	0.0118463	0.566977	0.446598	0.0596928	7.8352e+06	1.10923e+06	1.81682e+06	572665	1.01267e+06	310936	910480	1.22757e+06	1.97583e+06	515161	1.05649e+06	1.97754e+06	1.14233e+06	1.14233e+06	1.11905e+06
112POS		LPC(20:3)+Na	LPC(20:3)+Na	LPC	(20:3)	(20:3)				C28 H52 O7 N1 P1 Na1	568.337	2.5912	0.0707173	1.72333	0.0334589	0.567186	1.53844e+08	1.88225e+08	3.11274e+08	1.22423e+08	2.29367e+08	3.82065e+08	1.72836e+08	393697515	1.66244e+08	1.18446e+08	3.00398e+08	4.31571e+08	1.45614e+08	1.29183e+08	1.29067e+08
1130POS		TG(72:5)+NH4	TG(72:5)+NH4	TG	(72:5)	(72:5)				C75 H140 O6 N1	1151.07	24.8224	0.00961013	1.10562	0.776592	0.0236073	1.17975e+06	1.87434e+06	565947	1.07378e+06	1.4265e+06	618823	1.62639e+06	2.33458e+06	2.87717e+06	987141	2.33466e+06	3.90235e+06	1.65097e+06	1.6237e+06	1.62388e+06
1131POS		TG(72:4)+NH4	TG(72:4)+NH4	TG	(72:4)	(72:4)				C75 H142 O6 N1	1153.08	25.2144	0.0277867	0.642474	0.479171	0.0976415	2.00537e+07	3.18083e+06	5.58305e+06	1.94067e+06	2.93528e+06	1.1098e+06	3.0247e+06	3.26752e+06	6.02145e+06	1.96276e+06	4.03723e+06	7.57422e+06	3.27069e+06	3.12099e+06	3.11549e+06
1132POS		GM3(d34:1)+H	GM3(d34:1)+H	GM3	(d34:1)	(d34:1)				C57 H105 O21 N2	1153.72	8.39544	0.0166569	1.22002	0.395976	0.016798	2.15628e+06	1.84526e+06	4.06028e+06	1.72991e+06	3.53644e+06	2.43344e+06	3.94568e+06	1.59703e+06	1.48768e+06	1.51826e+06	3.41903e+06	3.01266e+06	1.61864e+06	1.66648e+06	1.62e+06
1133POS		TG(72:3)+NH4	TG(72:3)+NH4	TG	(72:3)	(72:3)				C75 H144 O6 N1	1155.1	25.4658	0.0132077	0.510484	0.387261	0.106973	2.30097e+07	3.23361e+06	4.08967e+06	1.84407e+06	3.15975e+06	901964	2.18191e+06	2.98494e+06	5.34796e+06	1.58622e+06	3.2678e+06	6.11633e+06	3.4503e+06	3.43703e+06	3.36633e+06
1134POS		TG(74:8)+NH4	TG(74:8)+NH4	TG	(74:8)	(74:8)				C77 H138 O6 N1	1173.05	24.667	0.0144544	0.564937	0.232869	0.0396191	2.13706e+06	314161	979109	500542	423552	241279	274506	396120	1.22267e+06	397876	686238	827372	389882	384244	378773
1135POS		PIP(52:3)+Na	PIP(52:3)+Na	PIP	(52:3)	(52:3)				C61 H114 O16 N0 P2 Na1	1187.75	11.404	0.0259358	0.91981	0.687204	0.0933559	1.44175e+07	6.89163e+06	1.77858e+07	1.29393e+07	2.85968e+07	1.35463e+07	1.55324e+07	2.39694e+07	1.71473e+07	1.27556e+07	1.75397e+07	1.73794e+07	1.325e+07	1.26677e+07	1.26765e+07
1136POS		PIP(52:2)+Na	PIP(52:2)+Na	PIP	(52:2)	(52:2)				C61 H116 O16 N0 P2 Na1	1189.76	12.018	0.0528329	1.79877	0.0438305	0.0853844	5.8412e+06	6.3149e+06	9.60993e+06	3.50885e+06	6.76487e+06	5.14741e+06	1.02064e+07	1.65865e+07	4.48424e+06	3.27265e+06	7.08479e+06	7.81861e+06	4.93279e+06	4.50741e+06	4.50729e+06
1137POS		GM2(d41:1+O)+H	GM2(d41:1+O)+H	GM2	(d41:1+O)	(d41:1+O)				C72 H132 O27 N3	1470.9	11.5697	0.0190626	0.601946	0.00160827	0.190479	1.54482e+07	9.99566e+06	6.29674e+06	1.3402e+07	1.67255e+07	1.13351e+07	1.16543e+07	9.88355e+06	1.50988e+07	1.74823e+07	2.27971e+07	1.16034e+07	1.04368e+07	1.01011e+07	1.00981e+07
1138POS		GM2(d42:1+O)+H	GM2(d42:1+O)+H	GM2	(d42:1+O)	(d42:1+O)				C73 H134 O27 N3	1484.92	12.0411	0.0129958	0.59932	0.00943914	0.29623	2.87026e+07	2.33798e+07	1.84839e+07	4.01461e+07	4.2903e+07	2.88954e+07	3.8121e+07	2.19934e+07	3.34393e+07	5.18279e+07	5.76554e+07	2.17577e+07	2.3647e+07	2.31207e+07	2.31246e+07
1139NEG		FA(20:4)-H	FA(20:4)-H	FA	(20:4)	(20:4)				O2 H31 C20	303.233	2.46873	0.0186236	1.09674	0.442065	0.114381	3.40531e+06	4.3402e+06	5.13803e+06	3.35974e+06	4.77817e+06	5.70826e+06	2.56987e+06	4.31723e+06	4.26387e+06	4.29338e+06	4.21957e+06	4.5991e+06	4.02714e+06	4.02806e+06	4.15893e+06
113POS		Cer(d18:0/18:0)+H	Cer(d36:0)+H	Cer	(d18:0/18:0)	(d18:0)	(18:0)			C36 H74 O3 N1	568.566	12.4403	0.0265776	2.01107	0.0405742	0.215544	1.15683e+07	2.38733e+07	6.57813e+07	2.11488e+07	4.85521e+07	3.79152e+07	6.69201e+07	7.78668e+07	2.04868e+07	3.01495e+07	1.77178e+07	2.85457e+07	2.22165e+07	2.12641e+07	2.11886e+07
1140NEG		FA(20:4)-H	FA(20:4)-H	FA	(20:4)	(20:4)				O2 H31 C20	303.233	4.74596	0.0258453	1.46517	0.014515	0.443718	1.40379e+07	1.67071e+07	2.03513e+07	7.8446e+06	1.63009e+07	2.54437e+07	1.65177e+07	2.35258e+07	1.46961e+07	1.61434e+07	1.16858e+07	1.57063e+07	1.51734e+07	1.52147e+07	1.58836e+07
1141NEG		FA(22:6)-H	FA(22:6)-H	FA	(22:6)	(22:6)				O2 H31 C22	327.233	4.3348	0.0418285	2.01515	0.0329501	0.89186	1.90669e+07	2.24537e+07	5.05291e+07	1.37904e+07	2.71346e+07	7.33413e+07	2.37466e+07	3.88606e+07	2.07424e+07	2.35987e+07	1.49487e+07	3.14398e+07	2.68633e+07	2.68947e+07	2.88744e+07
1142NEG		LPE(15:0)-H	LPE(15:0)-H	LPE	(15:0)	(15:0)				C20 H41 O7 N1 P1	438.263	2.73786	0.0326989	1.66967	0.0891842	0.0838884	270255	850624	412578	205441	390049	330503	355470	963618	353524	421764	349216	410277	427218	452007	427462
1143NEG		LPE(16:0e)-H	LPE(16:0e)-H	LPE	(16:0e)	(16:0e)				C21 H45 O6 N1 P1	438.299	3.78098	0.0207557	3.80449	0.177676	0.246639	443092	2.15704e+06	853875	417782	547118	6.90762e+06	866198	560313	540356	682990	510234	607040	1.15121e+06	1.19359e+06	1.19363e+06
1144NEG		LPE(16:1)-H	LPE(16:1)-H	LPE	(16:1)	(16:1)				C21 H41 O7 N1 P1	450.263	2.50334	0.0172686	1.18195	0.15665	0.17349	6.81035e+06	1.10264e+07	8.12401e+06	5.062e+06	8.35219e+06	1.01695e+07	6.3195e+06	8.58229e+06	7.82042e+06	7.3397e+06	8.90263e+06	8.12352e+06	7.87176e+06	7.87686e+06	8.11216e+06
1146NEG		LPE(17:1)-H	LPE(17:1)-H	LPE	(17:1)	(17:1)				C22 H43 O7 N1 P1	464.278	2.90118	0.00840788	1.60594	0.0454399	0.0750257	366749	834173	393306	274614	353746	651187	351033	877258	425171	449807	335993	435882	491566	498797	498793
1147NEG		LPE(17:0)-H	LPE(17:0)-H	LPE	(17:0)	(17:0)				C22 H45 O7 N1 P1	466.294	3.78292	0.00669506	1.43367	0.0891098	0.229084	4.38309e+06	9.17001e+06	5.30435e+06	3.37981e+06	4.75199e+06	5.33644e+06	4.709e+06	1.09351e+07	5.63694e+06	5.92397e+06	4.69858e+06	5.79802e+06	5.89083e+06	5.93917e+06	5.9696e+06
1148NEG		LPE(17:0)-H	LPE(17:0)-H	LPE	(17:0)	(17:0)				C22 H45 O7 N1 P1	466.294	4.23	0.00980579	1.63643	0.0307155	0.0995853	586170	1.31226e+06	766246	321785	496344	953406	688909	1.42974e+06	838950	907181	503869	829456	779739	780045	793211
1149NEG		LPE(18:0e)-H	LPE(18:0e)-H	LPE	(18:0e)	(18:0e)				C23 H49 O6 N1 P1	466.33	5.33274	0.0181902	2.356	0.15591	0.260217	1.04277e+06	3.18291e+06	1.75839e+06	1.14986e+06	1.41602e+06	8.2175e+06	1.7049e+06	1.35532e+06	1.36662e+06	1.39831e+06	1.07381e+06	1.32701e+06	2.08697e+06	2.15455e+06	2.1537e+06
114POS		Cer(d36:0)+H	Cer(d36:0)+H	Cer	(d36:0)	(d36:0)				C36 H74 O3 N1	568.566	11.4066	0.0197094	0.941407	0.647665	0.101532	1.71892e+07	1.54659e+07	1.19677e+07	1.21857e+07	1.97336e+07	1.58723e+07	1.8204e+07	1.05098e+07	1.24051e+07	1.18167e+07	1.95785e+07	1.54452e+07	1.34702e+07	1.30341e+07	1.30082e+07
1150NEG		LPE(18:3)-H	LPE(18:3)-H	LPE	(18:3)	(18:3)				C23 H41 O7 N1 P1	474.263	2.25874	0.019702	1.78472	1.0075e-05	0.16463	715470	1.43984e+06	1.33293e+06	683027	1.07921e+06	1.34308e+06	1.49616e+06	1.47091e+06	948436	757969	654778	1.55313e+06	1.1642e+06	1.20586e+06	1.20375e+06
1151NEG		LPE(18:2)-H	LPE(18:2)-H	LPE	(18:2)	(18:2)				C23 H43 O7 N1 P1	476.278	2.54211	0.0156697	1.17064	0.0999373	0.368938	3.06154e+07	4.69338e+07	4.59965e+07	3.04855e+07	4.35545e+07	5.08743e+07	4.25559e+07	5.57018e+07	4.86353e+07	4.62945e+07	4.54906e+07	4.48334e+07	4.47261e+07	4.58697e+07	4.60376e+07
1152NEG		LPE(18:1)-H	LPE(18:1)-H	LPE	(18:1)	(18:1)				C23 H45 O7 N1 P1	478.294	3.35631	0.00933233	1.10976	0.426486	0.477685	9.45195e+07	156760978	8.46741e+07	7.04716e+07	1.02512e+08	9.22848e+07	7.97879e+07	1.1486e+08	1.03627e+08	1.01946e+08	9.89294e+07	106423400	1.0147e+08	101548770	103157694
1153NEG		LPE(18:0)-H	LPE(18:0)-H	LPE	(18:0)	(18:0)				C23 H47 O7 N1 P1	480.31	4.53213	0.0204357	1.02033	0.843997	0.390942	7.08423e+08	6.83432e+08	6.98392e+08	552177807	8.15197e+08	6.76205e+08	5.30144e+08	9.80472e+08	7.05261e+08	7.2781e+08	6.53541e+08	6.78408e+08	7.02947e+08	7.04385e+08	7.28839e+08
1154NEG		LPG(16:0)-H	LPG(16:0)-H	LPG	(16:0)	(16:0)				C22 H44 O9 N0 P1	483.273	2.61335	0.036198	1.11756	0.445866	0.0875571	2.35935e+06	3.01197e+06	2.94291e+06	2.64873e+06	4.26477e+06	4.29777e+06	2.40951e+06	4.61131e+06	2.59917e+06	3.29724e+06	3.06378e+06	3.103e+06	3.03907e+06	3.23814e+06	3.2377e+06
1155NEG		LPE(19:1)-H	LPE(19:1)-H	LPE	(19:1)	(19:1)				C24 H47 O7 N1 P1	492.31	3.94948	0.0248713	2.24873	0.0546024	0.0973009	195737	1.03741e+06	381735	105490	230299	274654	265401	714527	314306	281086	222821	361475	341974	357288	356990
1156NEG		LPE(19:0)-H	LPE(19:0)-H	LPE	(19:0)	(19:0)				C24 H49 O7 N1 P1	494.325	5.11694	0.0248493	1.91508	0.0501244	0.1236	655700	1.81212e+06	845988	347045	400238	865628	588283	2.01064e+06	841636	835504	614518	952887	910280	911066	950433
1157NEG		LPE(20:0e)-H	LPE(20:0e)-H	LPE	(20:0e)	(20:0e)				C25 H53 O6 N1 P1	494.362	6.7545	0.00914805	1.19158	0.0690721	0.0898257	1.17574e+06	2.13122e+06	2.11733e+06	1.69033e+06	2.28335e+06	2.37172e+06	2.32373e+06	1.93754e+06	2.10717e+06	2.02125e+06	1.7838e+06	2.29932e+06	2.08268e+06	2.08642e+06	2.1176e+06
1158NEG		LPE(20:5)-H	LPE(20:5)-H	LPE	(20:5)	(20:5)				C25 H41 O7 N1 P1	498.263	2.12994	0.00895572	0.82272	0.337416	0.169539	2.76296e+06	1.75371e+06	2.22265e+06	2.69383e+06	2.94515e+06	4.9669e+06	1.6309e+06	2.08487e+06	3.18479e+06	2.89172e+06	3.33499e+06	1.99644e+06	2.79914e+06	2.84283e+06	2.84319e+06
1159NEG		LPE(20:4)-H	LPE(20:4)-H	LPE	(20:4)	(20:4)				C25 H43 O7 N1 P1	500.278	2.47084	0.00894405	1.17334	0.224592	0.951887	1.5437e+08	1.83387e+08	2.23859e+08	1.23717e+08	2.08507e+08	2.83121e+08	1.40328e+08	1.98199e+08	1.84836e+08	1.81102e+08	1.79249e+08	1.81739e+08	1.89365e+08	1.91201e+08	1.92781e+08
115POS		LPS(22:6)+H	LPS(22:6)+H	LPS	(22:6)	(22:6)				C28 H45 O9 N1 P1	570.283	2.00333	0.0541369	1.2679	0.388297	0.0268593	3.43148e+06	5.81174e+06	7.55132e+06	1.26886e+07	6.83596e+06	4.89343e+06	1.13064e+07	6.18454e+06	4.71189e+06	3.37206e+06	4.275e+06	9.02831e+06	5.46063e+06	4.98474e+06	4.97292e+06
1160NEG		LPE(20:4)-H	LPE(20:4)-H	LPE	(20:4)	(20:4)				C25 H43 O7 N1 P1	500.278	3.037	0.0524055	1.47115	0.449828	0.448559	4.10172e+06	6.50561e+06	5.10488e+06	5.68165e+06	5.64402e+06	4.02971e+07	5.65287e+06	3.22967e+07	7.82091e+06	2.70471e+07	2.76407e+07	2.47988e+07	5.50301e+06	5.07484e+06	4.99807e+06
1161NEG		LPE(20:3)-H	LPE(20:3)-H	LPE	(20:3)	(20:3)				C25 H45 O7 N1 P1	502.294	2.862	0.0314645	1.73853	0.0225979	0.308249	1.29914e+06	9.14428e+06	6.83162e+06	2.98157e+06	4.30014e+06	5.29518e+06	3.34807e+06	5.73868e+06	4.28966e+06	4.30571e+06	3.20229e+06	5.07082e+06	4.47086e+06	4.47604e+06	4.72171e+06
1162NEG		LPE(20:1)-H	LPE(20:1)-H	LPE	(20:1)	(20:1)				C25 H49 O7 N1 P1	506.325	4.63807	0.0363139	0.975337	0.903767	0.138927	3.9052e+06	5.98391e+06	3.79307e+06	2.37485e+06	3.19201e+06	2.2059e+06	2.15302e+06	4.39889e+06	4.55688e+06	4.65212e+06	2.99691e+06	2.60852e+06	3.3508e+06	3.57119e+06	3.57038e+06
1163NEG		LPG(18:2)-H	LPG(18:2)-H	LPG	(18:2)	(18:2)				C24 H44 O9 N0 P1	507.273	2.23482	0.0337243	2.48607	0.000822627	0.391641	2.36743e+06	6.88587e+06	5.24538e+06	1.95858e+06	3.85057e+06	4.85689e+06	4.77802e+06	9.61077e+06	2.20073e+06	2.12041e+06	2.86987e+06	6.82797e+06	4.49705e+06	4.77068e+06	4.77007e+06
1164NEG		LPE(20:0)-H	LPE(20:0)-H	LPE	(20:0)	(20:0)				C25 H51 O7 N1 P1	508.341	6.03887	0.0334065	0.650611	0.165213	0.155443	1.79822e+06	1.71495e+06	1.25458e+06	1.68662e+06	994777	1.14069e+06	815743	1.62623e+06	1.96461e+06	3.95222e+06	1.23413e+06	1.01479e+06	1.69724e+06	1.80267e+06	1.79574e+06
1165NEG		LPG(18:1)-H	LPG(18:1)-H	LPG	(18:1)	(18:1)				C24 H46 O9 N0 P1	509.288	2.58466	0.0149492	2.37088	0.000174799	0.47497	3.12487e+06	1.06268e+07	8.11267e+06	3.22056e+06	5.30282e+06	6.77189e+06	7.79796e+06	1.17095e+07	3.36688e+06	2.5071e+06	5.26381e+06	9.00412e+06	6.27505e+06	6.28369e+06	6.4432e+06
1166NEG		LPG(18:0)-H	LPG(18:0)-H	LPG	(18:0)	(18:0)				C24 H48 O9 N0 P1	511.304	3.58986	0.00693388	1.67653	0.00223092	0.138545	689289	1.37047e+06	1.20048e+06	780962	869438	1.27841e+06	982312	1.94029e+06	844513	828781	915564	1.49087e+06	1.11827e+06	1.11843e+06	1.13183e+06
1167NEG		LPC(14:0)+HCOO	LPC(14:0)+HCOO	LPC	(14:0)	(14:0)				C23 H47 O9 N1 P1	512.299	2.3003	0.0178871	1.75609	0.00829346	0.258709	2.15775e+06	5.43806e+06	4.90056e+06	2.04061e+06	3.17601e+06	3.53601e+06	2.67697e+06	6.4239e+06	3.63359e+06	2.8706e+06	2.37814e+06	5.57269e+06	3.62442e+06	3.62536e+06	3.73837e+06
1169NEG		LPS(18:0)-H	LPS(18:0)-H	LPS	(18:0)	(18:0)				C24 H47 O9 N1 P1	524.299	3.54025	0.0295364	0.923332	0.720567	0.111291	1.91362e+06	2.28264e+06	2.58241e+06	2.40555e+06	2.83801e+06	4.06062e+06	1.30136e+06	2.00714e+06	3.01648e+06	1.73904e+06	2.33404e+06	920308	3.31086e+06	3.31373e+06	3.48467e+06
116POS		LPC(20:1)+Na	LPC(20:1)+Na	LPC	(20:1)	(20:1)				C28 H56 O7 N1 P1 Na1	572.369	4.2357	0.0183875	2.49822	0.000563807	0.145938	3.32715e+06	1.24275e+07	1.46132e+07	2.31738e+06	6.1258e+06	1.32641e+07	6.59445e+06	1.21361e+07	4.66693e+06	5.21231e+06	5.47871e+06	8.73702e+06	2.93609e+06	2.84584e+06	2.84326e+06
1170NEG		LPE(22:5)-H	LPE(22:5)-H	LPE	(22:5)	(22:5)				C27 H45 O7 N1 P1	526.294	2.79099	0.00759155	3.54049	0.00917822	0.440555	1.6859e+06	1.10313e+07	5.38058e+06	1.85722e+06	2.69085e+06	4.84674e+06	4.52203e+06	1.41414e+07	2.27007e+06	1.67064e+06	2.53591e+06	5.07973e+06	4.7072e+06	4.70691e+06	4.76922e+06
1171NEG		LPE(22:4)-H	LPE(22:4)-H	LPE	(22:4)	(22:4)				C27 H47 O7 N1 P1	528.31	3.05893	0.0490883	2.10906	0.00458782	0.377521	1.79131e+06	9.25274e+06	6.67488e+06	2.30482e+06	4.06082e+06	4.63546e+06	4.60139e+06	9.39923e+06	3.37483e+06	3.41656e+06	4.08138e+06	5.57116e+06	3.86298e+06	4.20908e+06	4.21319e+06
1173NEG		LPC(16:1)+HCOO	LPC(16:1)+HCOO	LPC	(16:1)	(16:1)				C25 H49 O9 N1 P1	538.315	2.40874	0.0160482	1.43257	0.00281462	0.561047	1.58199e+07	3.54165e+07	2.77445e+07	1.61439e+07	2.33537e+07	2.90205e+07	2.35424e+07	2.83588e+07	2.14104e+07	2.27554e+07	1.84728e+07	2.48975e+07	2.24841e+07	2.31841e+07	2.3028e+07
1174NEG		LPC(16:1)+HCOO	LPC(16:1)+HCOO	LPC	(16:1)	(16:1)				C25 H49 O9 N1 P1	538.315	3.014	0.072983	2.357	0.199528	0.185472	1.24573e+06	3.41164e+06	3.60821e+06	189191	235024	3.67653e+06	302071	289950	371296	287619	2.66702e+06	486882	302487	266341	268167
1175NEG		Cer(d18:0/16:0)-H	Cer(d34:0)-H	Cer	(d18:0/16:0)	(d18:0)	(16:0)			C34 H68 O3 N1	538.52	12.25	0.0373469	1.25118	0.306888	0.175439	1.97759e+06	5.64567e+06	4.0336e+06	4.85355e+06	4.4678e+06	8.41221e+06	4.9619e+06	4.75325e+06	5.90755e+06	5.05389e+06	2.53583e+06	3.21784e+06	4.6002e+06	4.8353e+06	4.95181e+06
1176NEG		LPC(16:0)+HCOO	LPC(16:0)+HCOO	LPC	(16:0)	(16:0)				C25 H51 O9 N1 P1	540.331	3.05	0.00709626	1.06809	0.290511	0.63415	7.84372e+08	9.35705e+08	8.95929e+08	7.46771e+08	9.06483e+08	8.60953e+08	6.94344e+08	1022526876	8.75281e+08	8.45619e+08	839254996	9.28647e+08	8.55247e+08	8.55323e+08	8.6584e+08
1177NEG		LPS(20:4)-H	LPS(20:4)-H	LPS	(20:4)	(20:4)				C26 H43 O9 N1 P1	544.268	2.5228	0.0338746	1.22163	0.0988007	0.13984	3.04401e+06	4.26367e+06	3.6697e+06	2.91508e+06	3.8353e+06	6.15295e+06	4.316e+06	5.32345e+06	4.59463e+06	4.30595e+06	4.22864e+06	4.27841e+06	4.05594e+06	4.07198e+06	4.30675e+06
1178NEG		LPC(17:1)+HCOO	LPC(17:1)+HCOO	LPC	(17:1)	(17:1)				C26 H51 O9 N1 P1	552.331	2.74355	0.0305142	0.969857	0.830976	0.0527253	886471	1.42177e+06	751245	944163	882936	870242	610601	1.27708e+06	1.12853e+06	1.18925e+06	987915	906889	968533	971483	1.02213e+06
1179NEG		LPC(17:0)+HCOO	LPC(17:0)+HCOO	LPC	(17:0)	(17:0)				C26 H53 O9 N1 P1	554.346	3.59002	0.0171634	1.21701	0.156957	0.191939	6.58482e+06	1.11275e+07	9.09007e+06	5.6993e+06	7.96679e+06	8.38918e+06	6.30645e+06	1.28359e+07	9.2854e+06	8.52296e+06	7.91484e+06	8.20207e+06	8.188e+06	8.43843e+06	8.43418e+06
117POS		LPC(22:4)+H	LPC(22:4)+H	LPC	(22:4)	(22:4)				C30 H55 O7 N1 P1	572.371	2.87657	0.0794459	2.89418	0.000105164	0.342869	1.20233e+07	5.74125e+07	6.0595e+07	1.1241e+07	3.25884e+07	3.97076e+07	4.23013e+07	6.47325e+07	1.64214e+07	1.0434e+07	2.77697e+07	5.49932e+07	1.82992e+07	2.0891e+07	1.82183e+07
1180NEG		LPG(22:6)-H	LPG(22:6)-H	LPG	(22:6)	(22:6)				C28 H44 O9 N0 P1	555.273	2.03561	0.011574	3.01024	0.0012571	0.336311	950337	5.68789e+06	3.61447e+06	1.24261e+06	2.19891e+06	2.14301e+06	4.35476e+06	4.61587e+06	880460	475865	2.01203e+06	2.94409e+06	2.63848e+06	2.63836e+06	2.69167e+06
1181NEG		LPC(18:3)+HCOO	LPC(18:3)+HCOO	LPC	(18:3)	(18:3)				C27 H49 O9 N1 P1	562.315	2.18742	0.0134275	1.37428	0.0135445	0.248577	3.81192e+06	7.44711e+06	6.99545e+06	3.87112e+06	6.02879e+06	8.34646e+06	5.61469e+06	8.28198e+06	6.31632e+06	5.38457e+06	5.57268e+06	5.89703e+06	6.01706e+06	6.12038e+06	6.17897e+06
1182NEG		LPC(18:2)+HCOO	LPC(18:2)+HCOO	LPC	(18:2)	(18:2)				C27 H51 O9 N1 P1	564.331	2.43674	0.0282091	1.16818	0.180814	1.06744	1.73419e+08	2.51526e+08	2.95076e+08	183733689	2.57552e+08	3.43035e+08	1.93501e+08	2.48079e+08	2.55019e+08	2.62441e+08	261883066	2.97278e+08	2.42947e+08	2.55249e+08	2.55184e+08
1183NEG		Cer(d18:1/18:0)-H	Cer(d36:1)-H	Cer	(d18:1/18:0)	(d18:1)	(18:0)			C36 H70 O3 N1	564.536	13.1821	0.0349927	3.71571	3.74397e-06	0.918877	5.89119e+06	2.4472e+07	3.29774e+07	5.60279e+06	1.15189e+07	2.54743e+07	2.31363e+07	2.56871e+07	5.52441e+06	5.69623e+06	6.5251e+06	19700019	1.74705e+07	1.75757e+07	1.86031e+07
1185NEG		Cer(d18:0/18:0)-H	Cer(d36:0)-H	Cer	(d18:0/18:0)	(d18:0)	(18:0)			C36 H72 O3 N1	566.552	13.711	0.0261067	1.60659	0.0420979	0.119175	404038	1.15873e+06	1.26625e+06	979543	1.2413e+06	1.29347e+06	1.89122e+06	1.96432e+06	1.05857e+06	1.24786e+06	389261	973988	1.18403e+06	1.2327e+06	1.24398e+06
1186NEG		LPS(22:6)-H	LPS(22:6)-H	LPS	(22:6)	(22:6)				C28 H43 O9 N1 P1	568.268	2.47226	0.04207	1.13539	0.335504	0.271584	1.48943e+07	1.6754e+07	1.5649e+07	1.14931e+07	1.64576e+07	26054936	1.25934e+07	1.57404e+07	1.60484e+07	1.61227e+07	1.56326e+07	1.613e+07	1.53676e+07	1.65672e+07	1.65205e+07
1187NEG		LPS(22:6)-H	LPS(22:6)-H	LPS	(22:6)	(22:6)				C28 H43 O9 N1 P1	568.268	2.04901	0.0384136	1.19644	0.0920393	0.0988527	2.19622e+06	3.15284e+06	2.58573e+06	3.08166e+06	2.98095e+06	2.94187e+06	3.87521e+06	2.76525e+06	2.56263e+06	1.80698e+06	2.78649e+06	3.12208e+06	2.69276e+06	2.69208e+06	2.87562e+06
1188NEG		LPC(18:0)+HCOO	LPC(18:0)+HCOO	LPC	(18:0)	(18:0)				C27 H55 O9 N1 P1	568.362	4.27548	0.0126024	0.926827	0.324885	1.03784	4.62896e+08	4.25594e+08	554042735	4.50568e+08	6.3981e+08	4.84119e+08	4.02046e+08	4.8024e+08	5.29916e+08	5.21015e+08	4.75406e+08	5.08226e+08	4.81648e+08	4.81627e+08	4.92228e+08
1189NEG		LPI(16:0)-H	LPI(16:0)-H	LPI	(16:0)	(16:0)				C25 H48 O12 N0 P1	571.289	2.4837	0.0104363	0.950378	0.623032	0.129345	6.42328e+06	8.29785e+06	7.88015e+06	1.0833e+07	7.7451e+06	7.77103e+06	9.37255e+06	7.37582e+06	7.7727e+06	9.59446e+06	6.97051e+06	6.1933e+06	9.46645e+06	9.52712e+06	9.66125e+06
118POS		LPC(20:0)+Na	LPC(20:0)+Na	LPC	(20:0)	(20:0)				C28 H58 O7 N1 P1 Na1	574.384	5.65987	0.0387873	0.804315	0.272956	0.0660449	3.92192e+06	2.74006e+06	3.94642e+06	2.26868e+06	3.75238e+06	3.2286e+06	3.17003e+06	2.29197e+06	3.96006e+06	4.43773e+06	6.7971e+06	4.84168e+06	5.37687e+06	5.74186e+06	5.36856e+06
1190NEG		LPC(19:1)+HCOO	LPC(19:1)+HCOO	LPC	(19:1)	(19:1)				C28 H55 O9 N1 P1	580.362	3.70481	0.103724	1.85882	0.0934462	0.0848116	228675	955638	446526	106246	251986	276909	191080	574222	336681	351292	240634	372700	359404	432377	367197
1191NEG		LPC(19:0)+HCOO	LPC(19:0)+HCOO	LPC	(19:0)	(19:0)				C28 H57 O9 N1 P1	582.378	5.0893	0.00481425	0.92757	0.541026	0.0921041	4.16956e+06	3.89974e+06	4.59604e+06	2.82205e+06	3.31284e+06	3.47644e+06	2.75434e+06	4.03052e+06	5.34409e+06	4.993e+06	3.91067e+06	4.01681e+06	3.7957e+06	3.81851e+06	3.83205e+06
1192NEG		LPC(19:0)+HCOO	LPC(19:0)+HCOO	LPC	(19:0)	(19:0)				C28 H57 O9 N1 P1	582.378	4.79175	0.0317595	0.978084	0.928788	0.0584086	687249	1.20574e+06	580907	479617	569357	376875	315898	1.01048e+06	1.06176e+06	798510	601621	616201	568022	570238	600963
1194NEG		Cer(d34:0)+HCOO	Cer(d34:0)+HCOO	Cer	(d18:0/16:0)	(d18:0)	(16:0)			C35 H70 O5 N1	584.526	12.25	0.0328161	1.31489	0.250768	0.883944	3.44173e+07	8.52948e+07	8.67621e+07	8.77997e+07	8.72913e+07	1.56049e+08	9.02108e+07	9.02755e+07	8.40706e+07	9.59324e+07	3.46915e+07	4.91888e+07	8.20864e+07	8.59948e+07	8.75036e+07
1195NEG		LPC(20:5)+HCOO	LPC(20:5)+HCOO	LPC	(20:5)	(20:5)				C29 H49 O9 N1 P1	586.315	2.0479	0.022447	0.919982	0.617755	0.111006	2.01265e+06	1.62836e+06	2.31278e+06	1.66583e+06	2.31828e+06	3.31354e+06	1.22829e+06	1.63347e+06	2.15363e+06	2.23038e+06	2.2401e+06	1.49454e+06	1.84017e+06	1.91723e+06	1.90936e+06
1197NEG		LPC(20:3)+HCOO	LPC(20:3)+HCOO	LPC	(20:3)	(20:3)				C29 H53 O9 N1 P1	590.346	2.64609	0.0353098	1.0776	0.571996	0.137166	1.6952e+07	2.23088e+07	1.73481e+07	1.52715e+07	1.84124e+07	2.14971e+07	8.65872e+06	1.59402e+07	1.7498e+07	1.37708e+07	1.45e+07	1.81323e+07	1.67109e+07	1.77829e+07	1.77697e+07
1198NEG		Cer(d18:2/20:0)-H	Cer(d38:2)-H	Cer	(d18:2/20:0)	(d18:2)	(20:0)			C38 H72 O3 N1	590.552	13.3666	0.0374623	2.33533	0.0282577	0.166194	755166	3.36753e+06	1.10706e+06	494170	670914	1.24981e+06	1.61358e+06	1.07507e+06	713413	901421	633017	1.32086e+06	1.24358e+06	1.24563e+06	1.32713e+06
1199NEG		LPC(20:2)+HCOO	LPC(20:2)+HCOO	LPC	(20:2)	(20:2)				C29 H55 O9 N1 P1	592.362	3.19789	0.0496665	1.49115	0.0581528	0.156698	885484	2.98231e+06	2.40429e+06	1.27622e+06	2.49193e+06	2.29006e+06	1.10409e+06	2.49249e+06	1.58532e+06	1.41123e+06	1.24726e+06	1.99422e+06	1.54733e+06	1.68725e+06	1.68979e+06
119POS		DG(34:2p)+H	DG(34:2p)+H	DG	(34:2p)	(34:2p)				C37 H69 O4	577.519	24.243	0.0211523	1.45613	0.0711252	0.0587836	8.68356e+06	8.40605e+06	8.42123e+06	3.15695e+06	7.287e+06	4.40398e+06	1.04042e+07	7.32517e+06	6.27524e+06	3.18867e+06	4.72301e+06	9.5496e+06	7.76557e+06	7.74654e+06	8.04325e+06
11POS		WE(23:1)+NH4	WE(23:1)+NH4	WE	(23:1)	(23:1)				H48 C23 O2 N1	370.368	4.33866	0.0158256	3.10108	0.00742734	0.196975	3.61776e+06	1.18638e+07	3.29127e+07	3.1841e+06	1.53867e+07	8.24229e+06	2.9835e+07	2.47189e+07	4.76978e+06	9.90424e+06	5.80056e+06	2.47292e+07	7.75133e+06	7.74861e+06	7.53947e+06
1200NEG		Cer(d18:1/20:0)-H	Cer(d38:1)-H	Cer	(d18:1/20:0)	(d18:1)	(20:0)			C38 H74 O3 N1	592.567	14.7368	0.0262602	1.38311	0.0234746	0.268525	6.1968e+06	1.08633e+07	8.22901e+06	3.98481e+06	7.00417e+06	7.09382e+06	7.35546e+06	6.99372e+06	4.66385e+06	6.36986e+06	5.62308e+06	6.27261e+06	6.63572e+06	6.95988e+06	6.93215e+06
1201NEG		LPC(20:1)+HCOO	LPC(20:1)+HCOO	LPC	(20:1)	(20:1)				C29 H57 O9 N1 P1	594.378	4.39506	0.0451249	1.0493	0.818386	0.134783	2.58771e+06	5.25477e+06	3.42695e+06	2.24562e+06	2.53734e+06	1.97355e+06	1.78263e+06	2.74412e+06	2.89957e+06	3.93199e+06	2.46581e+06	2.30776e+06	2.85235e+06	2.66435e+06	2.90545e+06
1202NEG		LPI(18:2)-H	LPI(18:2)-H	LPI	(18:2)	(18:2)				C27 H48 O12 N0 P1	595.289	2.0741	0.0375116	1.28022	0.126117	0.0668615	381852	883002	778114	718874	706231	532295	1.19548e+06	991547	844246	819544	805519	1.09413e+06	935630	999342	998999
1203NEG		LPC(20:0)+HCOO	LPC(20:0)+HCOO	LPC	(20:0)	(20:0)				C29 H59 O9 N1 P1	596.393	5.79952	0.0467891	0.430252	0.00706705	0.281341	2.84211e+06	1.85836e+06	1.63988e+06	2.93471e+06	1.80486e+06	1.11923e+06	1.15051e+06	1.17148e+06	3.2328e+06	5.58846e+06	2.65024e+06	1.2582e+06	2.09868e+06	2.24903e+06	2.29743e+06
1204NEG		Cer(d16:0/19:1)+HCOO	Cer(d35:1)+HCOO	Cer	(d16:0/19:1)	(d16:0)	(19:1)			C36 H70 O5 N1	596.526	12.456	0.0343902	3.57016	0.000390466	0.848607	6.14385e+06	3.79002e+07	2.53409e+07	4.27266e+06	7.57e+06	2.03973e+07	2.00762e+07	2.28971e+07	6.17543e+06	6.82193e+06	8.65172e+06	1.48936e+07	1.72274e+07	1.76968e+07	1.84406e+07
1205NEG		LPI(18:1)-H	LPI(18:1)-H	LPI	(18:1)	(18:1)				C27 H50 O12 N0 P1	597.305	2.58611	0.0190621	1.20707	0.184246	0.0892632	1.4498e+06	2.84612e+06	2.31101e+06	2.06066e+06	1.74463e+06	1.88691e+06	3.21285e+06	2.19988e+06	1.91262e+06	2.33018e+06	2.09404e+06	1.53544e+06	2.57867e+06	2.57886e+06	2.66486e+06
1206NEG		LPI(18:0)-H	LPI(18:0)-H	LPI	(18:0)	(18:0)				C27 H52 O12 N0 P1	599.32	3.35447	0.0148473	1.17627	0.163392	0.503648	7.06488e+07	9.45275e+07	1.06634e+08	9.48029e+07	1.12007e+08	9.25362e+07	1.42607e+08	9.20933e+07	9.02865e+07	8.4554e+07	7.40155e+07	9.06918e+07	1.08511e+08	1.08502e+08	1.11321e+08
1207NEG		Cer(d18:1/21:0)-H	Cer(d39:1)-H	Cer	(d18:1/21:0)	(d18:1)	(21:0)			C39 H76 O3 N1	606.583	15.5407	0.0471089	1.21569	0.172423	0.0783027	1.99258e+06	2.99961e+06	1.94651e+06	1.02367e+06	1.41722e+06	2.06308e+06	1.88797e+06	1.94914e+06	1.84633e+06	2.27017e+06	1.89663e+06	1.85351e+06	1.81852e+06	1.98264e+06	1.967e+06
1208NEG		Cer(d18:2/18:0)+HCOO	Cer(d36:2)+HCOO	Cer	(d18:2/18:0)	(d18:2)	(18:0)			C37 H70 O5 N1	608.526	11.934	0.0164911	4.4529	5.42371e-05	0.892479	5.01063e+06	2.68551e+07	3.14789e+07	4.8155e+06	7.87837e+06	1.47754e+07	2.47982e+07	2.39774e+07	4.71327e+06	3.41189e+06	5.2104e+06	1.63334e+07	1.38051e+07	1.39301e+07	1.42524e+07
120POS		LPC(22:1)+H	LPC(22:1)+H	LPC	(22:1)	(22:1)				C30 H61 O7 N1 P1	578.418	5.70345	0.0234375	1.78941	0.00306172	0.0894239	2.77699e+06	8.84176e+06	8.19347e+06	2.42888e+06	5.60853e+06	4.85277e+06	6.27023e+06	6.86296e+06	3.59844e+06	3.55126e+06	5.41443e+06	6.81268e+06	3.63797e+06	3.63833e+06	3.49243e+06
1211NEG		Cer(d36:0)+HCOO	Cer(d36:0)+HCOO	Cer	(d18:0/18:0)	(d18:0)	(18:0)			C37 H74 O5 N1	612.557	13.711	0.0362918	1.7752	0.0252544	0.624998	8.05187e+06	2.20758e+07	2.66126e+07	1.6543e+07	2.51343e+07	2.64998e+07	3.95044e+07	4.21304e+07	1.65299e+07	2.62685e+07	7.58209e+06	2.08917e+07	2.48135e+07	2.65553e+07	2.62947e+07
1212NEG		LPI(19:0)-H	LPI(19:0)-H	LPI	(19:0)	(19:0)				C28 H54 O12 N0 P1	613.336	3.96607	0.0657307	1.23248	0.0994601	0.0341329	310784	451420	492213	264316	230656	305050	362186	331315	408410	356448	290861	352053	341810	384792	382986
1213NEG		LPC(22:5)+HCOO	LPC(22:5)+HCOO	LPC	(22:5)	(22:5)				C31 H53 O9 N1 P1	614.346	2.42659	0.0213861	2.49095	0.0050178	0.372167	2.12821e+06	8.34526e+06	6.08131e+06	2.11117e+06	3.31493e+06	4.95797e+06	2.73068e+06	9.73888e+06	2.5369e+06	2.05404e+06	2.84589e+06	5.48806e+06	4.09877e+06	4.09861e+06	4.25241e+06
1214NEG		LPC(22:4)+HCOO	LPC(22:4)+HCOO	LPC	(22:4)	(22:4)				C31 H55 O9 N1 P1	616.362	2.9546	0.0371957	2.67596	0.0223515	0.249151	676976	4.1957e+06	3.38624e+06	949446	958610	350073	1.62447e+06	3.4812e+06	1.29116e+06	836306	960003	2.14171e+06	1.50684e+06	1.60929e+06	1.60722e+06
1215NEG		Cer(d18:2/22:0)-H	Cer(d40:2)-H	Cer	(d18:2/22:0)	(d18:2)	(22:0)			C40 H76 O3 N1	618.583	14.9391	0.026012	1.08219	0.50456	0.0786149	4.84119e+06	7.79402e+06	4.54375e+06	4.46495e+06	4.08085e+06	4.88964e+06	4.85316e+06	4.72057e+06	5.7403e+06	5.00874e+06	4.71482e+06	4.42091e+06	4.91488e+06	4.94817e+06	5.15522e+06
1216NEG		LPI(20:4)-H	LPI(20:4)-H	LPI	(20:4)	(20:4)				C29 H48 O12 N0 P1	619.289	2.01554	0.0390297	1.17227	0.0534178	0.272542	1.26689e+07	1.71963e+07	1.77819e+07	1.77004e+07	1.99395e+07	2.17203e+07	1.86982e+07	2.07793e+07	1.63055e+07	1.52505e+07	1.8416e+07	2.13801e+07	2.08022e+07	2.08169e+07	2.22487e+07
1217NEG		Cer(d18:1/22:0)-H	Cer(d40:1)-H	Cer	(d18:1/22:0)	(d18:1)	(22:0)			C40 H78 O3 N1	620.599	16.3271	0.0172961	1.09456	0.0228881	0.163124	3.0158e+07	3.35236e+07	2.96245e+07	2.73122e+07	2.70818e+07	3.11646e+07	2.95406e+07	3.08238e+07	2.52083e+07	2.97352e+07	2.93784e+07	3.01656e+07	2.97463e+07	2.97745e+07	3.06606e+07
1218NEG		LPC(22:1)+HCOO	LPC(22:1)+HCOO	LPC	(22:1)	(22:1)				C31 H61 O9 N1 P1	622.409	5.84788	0.00787162	1.25219	0.16148	0.0487555	186250	472812	319915	209202	275326	248525	272516	342954	276461	302655	244689	214778	285015	284908	288863
1219NEG		Cer(d18:0/22:0)-H	Cer(d40:0)-H	Cer	(d18:0/22:0)	(d18:0)	(22:0)			C40 H80 O3 N1	622.614	16.853	0.0214307	0.907923	0.482717	0.0674773	889543	1.0754e+06	1.19944e+06	1.04186e+06	1.32989e+06	1.14535e+06	1.02408e+06	1.0876e+06	1.17644e+06	1.66553e+06	800046	735807	1.08508e+06	1.08721e+06	1.12692e+06
121POS		LPC(22:0)+H	LPC(22:0)+H	LPC	(22:0)	(22:0)				C30 H63 O7 N1 P1	580.434	7.03681	0.0215043	1.5383	0.0360047	0.129034	1.47377e+07	2.07669e+07	3.15151e+07	1.02635e+07	2.69424e+07	2.3526e+07	2.73427e+07	2.34475e+07	1.70069e+07	1.36521e+07	2.57909e+07	4.01433e+07	1.68065e+07	1.67967e+07	1.61836e+07
1220NEG		LPC(22:0)+HCOO	LPC(22:0)+HCOO	LPC	(22:0)	(22:0)				C31 H63 O9 N1 P1	624.425	7.19749	0.00831239	1.1281	0.081601	0.0538083	967289	1.26421e+06	1.53593e+06	1.01683e+06	1.24951e+06	1.19221e+06	1.25983e+06	1.38873e+06	1.263e+06	1.32471e+06	1.23579e+06	1.32026e+06	1.23106e+06	1.24901e+06	1.2489e+06
1221NEG		Cer(d18:1/19:0)+HCOO	Cer(d37:1)+HCOO	Cer	(d18:1/19:0)	(d18:1)	(19:0)			C38 H74 O5 N1	624.557	13.9531	0.0374411	3.2221	0.000209548	0.876603	8.15021e+06	3.74866e+07	2.10165e+07	4.83018e+06	1.03534e+07	1.96349e+07	2.39144e+07	3.42432e+07	7.5023e+06	7.90324e+06	1.02837e+07	2.16613e+07	1.91746e+07	2.05679e+07	2.03524e+07
1222NEG		Cer(d17:0+pO/19:0)+HCOO	Cer(d36:0+pO)+HCOO	Cer	(d17:0+pO/19:0)	(d17:0+pO)	(19:0)			C37 H74 O6 N1	628.552	12.374	0.0544758	1.28716	0.0770471	0.114194	3.81231e+06	5.38989e+06	3.6722e+06	2.22372e+06	2.26695e+06	3.61112e+06	3.3441e+06	3.18467e+06	3.17176e+06	3.48586e+06	2.62595e+06	3.43468e+06	3.69603e+06	3.73918e+06	4.07778e+06
1223NEG		Cer(d17:1/24:1)-H	Cer(d41:2)-H	Cer	(d17:1/24:1)	(d17:1)	(24:1)			C41 H78 O3 N1	632.599	15.4431	0.0334805	1.7564	0.0339861	0.205708	1.90284e+06	5.70968e+06	2.39811e+06	1.00345e+06	1.73665e+06	2.79146e+06	2.48378e+06	3.42078e+06	1.96041e+06	2.4498e+06	1.86957e+06	2.3808e+06	2.63833e+06	2.80701e+06	2.78571e+06
1224NEG		Cer(d18:2/23:0)-H	Cer(d41:2)-H	Cer	(d18:2/23:0)	(d18:2)	(23:0)			C41 H78 O3 N1	632.599	15.7484	0.0427657	1.27078	0.03215	0.10321	2.34159e+06	3.35628e+06	2.38534e+06	1.4546e+06	1.71818e+06	2.39532e+06	2.44502e+06	2.2035e+06	2.18713e+06	2.19484e+06	2.082e+06	2.43637e+06	2.31592e+06	2.50269e+06	2.48926e+06
1225NEG		Cer(d18:1/23:0)-H	Cer(d41:1)-H	Cer	(d18:1/23:0)	(d18:1)	(23:0)			C41 H80 O3 N1	634.614	16.8491	0.0273441	1.25578	0.0877836	0.0554028	971777	1.35983e+06	1.02234e+06	655314	626725	1.06308e+06	770169	1.0345e+06	999589	990480	1.01631e+06	1.35575e+06	911186	912401	955657
1226NEG		Cer(d18:1/23:0)-H	Cer(d41:1)-H	Cer	(d18:1/23:0)	(d18:1)	(23:0)			C41 H80 O3 N1	634.614	17.1106	0.028847	1.22828	0.0218739	0.267983	1.5298e+07	1.62641e+07	1.61948e+07	9.20033e+06	1.31409e+07	1.54121e+07	1.49508e+07	1.63905e+07	1.46149e+07	1.36884e+07	1.45918e+07	1.9706e+07	1.50126e+07	1.58093e+07	1.57659e+07
1227NEG		Cer(d18:2/20:0)+HCOO	Cer(d38:2)+HCOO	Cer	(d18:2/20:0)	(d18:2)	(20:0)			C39 H74 O5 N1	636.557	13.3666	0.0401403	2.41837	0.0149141	0.873294	1.78756e+07	7.59302e+07	3.04509e+07	1.22005e+07	1.77397e+07	2.71855e+07	3.80302e+07	2.93548e+07	1.35005e+07	1.79308e+07	1.63288e+07	3.01858e+07	2.84463e+07	3.06816e+07	3.03043e+07
1229NEG		Cer(d18:1/20:0)+HCOO	Cer(d38:1)+HCOO	Cer	(d18:1/20:0)	(d18:1)	(20:0)			C39 H76 O5 N1	638.573	14.466	0.0228379	2.09115	0.000378131	0.258501	1.7638e+06	3.78386e+06	4.09517e+06	1.23019e+06	1.30172e+06	2.13607e+06	2.82149e+06	3.41758e+06	1.41603e+06	1.56093e+06	1.79843e+06	2.71484e+06	2.12192e+06	2.12367e+06	2.20787e+06
122POS		Cer(d18:1/19:0)+H	Cer(d37:1)+H	Cer	(d18:1/19:0)	(d18:1)	(19:0)			C37 H74 O3 N1	580.566	12.599	0.0189038	3.85847	0.000120386	0.262483	6.85334e+06	2.67334e+07	3.18461e+07	3.25577e+06	1.07124e+07	1.40428e+07	2.67475e+07	3.64166e+07	5.67966e+06	4.79421e+06	1.09882e+07	2.73633e+07	8.20263e+06	8.2188e+06	7.94515e+06
1230NEG		Cer(d18:2/24:2)-H	Cer(d42:4)-H	Cer	(d18:2/24:2)	(d18:2)	(24:2)			C42 H76 O3 N1	642.583	13.5161	0.0536873	2.52305	0.0415522	0.18228	432471	3.48965e+06	1.22832e+06	395224	1.27265e+06	1.23303e+06	1.06439e+06	1.28724e+06	449246	552935	644996	1.15258e+06	1.28981e+06	1.33213e+06	1.43113e+06
1231NEG		Cer(d18:1/24:2)-H	Cer(d42:3)-H	Cer	(d18:1/24:2)	(d18:1)	(24:2)			C42 H78 O3 N1	644.599	14.8563	0.0196418	2.654	0.000207583	0.864567	8.92583e+06	3.97151e+07	2.70473e+07	7.68299e+06	1.42005e+07	2.05486e+07	2.92272e+07	2.89183e+07	9.17105e+06	1.19214e+07	1.06692e+07	2.0607e+07	2.02251e+07	2.02465e+07	2.09319e+07
1233NEG		Cer(d18:2/24:0)-H	Cer(d42:2)-H	Cer	(d18:2/24:0)	(d18:2)	(24:0)			C42 H80 O3 N1	646.614	16.5182	0.0286952	1.54535	0.0250374	0.333703	6.4234e+06	15613137	9.87339e+06	5.13214e+06	6.7639e+06	8.44317e+06	8.63655e+06	7.75332e+06	5.30018e+06	8.17864e+06	5.9082e+06	7.95015e+06	7.85345e+06	7.96589e+06	8.29717e+06
1234NEG		Cer(d18:0/24:1)-H	Cer(d42:1)-H	Cer	(d18:0/24:1)	(d18:0)	(24:1)			C42 H82 O3 N1	648.63	16.7696	0.0241055	1.26402	0.191506	0.122504	1.64589e+06	3.91385e+06	2.53684e+06	1.75139e+06	3.68927e+06	3.30169e+06	2.60537e+06	2.90398e+06	2.44227e+06	2.9322e+06	1.40413e+06	2.26413e+06	2.56112e+06	2.65967e+06	2.67973e+06
1235NEG		Cer(d18:1/24:0)-H	Cer(d42:1)-H	Cer	(d18:1/24:0)	(d18:1)	(24:0)			C42 H82 O3 N1	648.63	17.8702	0.0448408	0.494016	0.172858	0.760163	1.40173e+06	1.72903e+06	4.38963e+07	3.50021e+07	3.53465e+07	3.91885e+07	962967	1.21874e+06	3.04475e+07	4.10919e+07	3.63051e+07	1.72718e+06	1.25475e+06	1.35901e+06	1.35597e+06
1236NEG		LPC(24:1)+HCOO	LPC(24:1)+HCOO	LPC	(24:1)	(24:1)				C33 H65 O9 N1 P1	650.44	7.18142	0.0407642	1.57792	0.00508095	0.0917956	313403	708016	837860	336941	480638	483622	688134	491733	380248	497731	385468	568843	423734	455087	455172
1237NEG		Cer(d18:2/21:0)+HCOO	Cer(d39:2)+HCOO	Cer	(d18:2/21:0)	(d18:2)	(21:0)			C40 H76 O5 N1	650.573	14.162	0.0291439	1.97415	0.00228836	0.378675	3.81765e+06	1.16969e+07	6.93156e+06	2.30241e+06	3.37206e+06	6.01697e+06	6.37516e+06	8.13823e+06	4.25961e+06	4.57746e+06	5.2364e+06	7.36323e+06	5.93098e+06	5.94482e+06	6.24253e+06
1238NEG		Cer(d18:0/24:0)-H	Cer(d42:0)-H	Cer	(d18:0/24:0)	(d18:0)	(24:0)			C42 H84 O3 N1	650.646	18.377	0.0205959	0.927712	0.489674	0.0570755	621988	812417	845803	901677	960360	919834	845686	704954	865805	1.09474e+06	668595	614848	907737	887345	924634
1239NEG		LPC(24:0)+HCOO	LPC(24:0)+HCOO	LPC	(24:0)	(24:0)				C33 H67 O9 N1 P1	652.456	8.55052	0.0138812	1.23671	0.00997087	0.112502	1.7809e+06	2.0337e+06	2.51662e+06	1.6867e+06	2.148e+06	2.35981e+06	2.12044e+06	2.63102e+06	1.97209e+06	2.21625e+06	1.86414e+06	2.7684e+06	2.14989e+06	2.20191e+06	2.14972e+06
123POS		DG(16:0/16:1)+NH4	DG(32:1)+NH4	DG	(16:0/16:1)	(16:0)	(16:1)			C35 H70 O5 N1	584.525	11.7754	0.00768796	2.46268	0.000204821	0.237821	1.27215e+07	2.01606e+07	3.37707e+07	7.84417e+06	1.87538e+07	25661600	3.81478e+07	3.10529e+07	1.19845e+07	7.28189e+06	1.33373e+07	2.83299e+07	1.58133e+07	1.56075e+07	1.56018e+07
1240NEG		Cer(d39:1)+HCOO	Cer(d39:1)+HCOO	Cer	(d18:1/21:0)	(d18:1)	(21:0)			C40 H78 O5 N1	652.589	15.5407	0.0250581	1.26208	0.0850903	0.422169	4.66704e+07	6.6937e+07	4.46175e+07	2.33925e+07	3.09802e+07	4.41794e+07	4.41321e+07	4.71052e+07	4.30972e+07	4.66581e+07	41639184	4.63844e+07	4.39856e+07	4.50969e+07	4.62462e+07
1241NEG		Cer(d18:1/22:2)+HCOO	Cer(d40:3)+HCOO	Cer	(d18:1/22:2)	(d18:1)	(22:2)			C41 H76 O5 N1	662.573	13.386	0.0327617	2.93095	0.00226242	0.964691	1.26334e+07	6.15993e+07	2.81868e+07	7.38755e+06	1.44945e+07	2.52027e+07	3.26134e+07	4.03857e+07	9.88311e+06	1.40078e+07	1.46605e+07	2.61671e+07	2.70417e+07	2.7743e+07	2.88532e+07
1242NEG		Cer(d18:1/25:0)-H	Cer(d43:1)-H	Cer	(d18:1/25:0)	(d18:1)	(25:0)			C43 H84 O3 N1	662.646	18.5999	0.0211912	1.57018	0.00343611	0.114956	944922	1.54334e+06	1.0679e+06	516797	748363	1.13267e+06	929824	1.04471e+06	673068	607633	814726	1.04198e+06	1.02435e+06	1.00727e+06	1.0505e+06
1243NEG		Cer(d18:2/22:0)+HCOO	Cer(d40:2)+HCOO	Cer	(d18:2/22:0)	(d18:2)	(22:0)			C41 H78 O5 N1	664.589	14.9391	0.0650973	0.912115	0.471091	0.623837	118151154	1.33784e+08	1.0792e+08	8.77876e+07	1.22818e+08	8.27581e+07	8.71934e+07	8.47356e+07	8.74442e+07	1.50323e+08	9.52501e+07	1.07223e+08	120789898	1.24312e+08	1.36567e+08
1244NEG		Cer(d18:1/22:1)+HCOO	Cer(d40:2)+HCOO	Cer	(d18:1/22:1)	(d18:1)	(22:1)			C41 H78 O5 N1	664.589	14.6824	0.0416065	1.2748	0.231227	0.666102	7.65379e+07	1.45954e+08	6.83247e+07	4.24241e+07	7.07853e+07	6.74775e+07	7.15302e+07	7.55479e+07	5.13777e+07	8.43413e+07	6.72165e+07	7.17561e+07	7.99711e+07	8.05144e+07	8.61485e+07
1245NEG		Cer(d18:0+pO/24:1)-H	Cer(d42:1+pO)-H	Cer	(d18:0+pO/24:1)	(d18:0+pO)	(24:1)			C42 H82 O4 N1	664.625	15.3489	0.0439361	1.85604	0.0159928	0.202465	1.56194e+06	4.72543e+06	2.26894e+06	1.05685e+06	1.73809e+06	2.39399e+06	2.09625e+06	2.25382e+06	1.25169e+06	1.41561e+06	1.60633e+06	2.28015e+06	2.05987e+06	2.23213e+06	2.21676e+06
1246NEG		Cer(d18:1/22:0)+HCOO	Cer(d40:1)+HCOO	Cer	(d18:1/22:0)	(d18:1)	(22:0)			C41 H80 O5 N1	666.604	16.3271	0.0178282	1.06809	0.0851052	0.523528	8.62081e+08	9.53307e+08	845516892	773799162	8.0695e+08	8.36117e+08	8.4386e+08	8.59969e+08	7.18108e+08	8.34516e+08	8.45828e+08	8.3216e+08	8.26149e+08	8.53196e+08	8.51063e+08
1247NEG		Cer(d40:0)+HCOO	Cer(d40:0)+HCOO	Cer	(d18:0/22:0)	(d18:0)	(22:0)			C41 H82 O5 N1	668.62	15.1809	0.134859	0.351489	0.0329508	0.1603	890906	780509	240815	1.52396e+06	510435	516641	275734	297416	311887	1.44637e+06	2.19132e+06	305329	1.08031e+06	845014	883290
1248NEG		PE(32:0p)-H	PE(32:0p)-H	PE	(32:0p)	(32:0p)				C37 H73 O7 N1 P1	674.513	12.506	0.0420375	1.7429	0.0027275	0.218165	2.27346e+06	4.51464e+06	3.18402e+06	2.95643e+06	1.5743e+06	2.31112e+06	3.45661e+06	3.85306e+06	2.05861e+06	1.9161e+06	1.61832e+06	4.28772e+06	3.04316e+06	3.04675e+06	3.27215e+06
1249NEG		Cer(d17:1/24:2)+HCOO	Cer(d41:3)+HCOO	Cer	(d17:1/24:2)	(d17:1)	(24:2)			C42 H78 O5 N1	676.589	14.126	0.0419537	3.3201	0.00102344	0.750292	5.4383e+06	3.24889e+07	1.80983e+07	3.39073e+06	6.61193e+06	1.18454e+07	1.55588e+07	2.24519e+07	6.21385e+06	6.82408e+06	6.89946e+06	1.70164e+07	1.22441e+07	1.32253e+07	1.31243e+07
124POS		LPC(22:6)+Na	LPC(22:6)+Na	LPC	(22:6)	(22:6)				C30 H50 O7 N1 P1 Na1	590.322	2.23038	0.0117113	1.58921	0.0122011	0.500608	1.50963e+08	194362323	3.21073e+08	1.35497e+08	2.23199e+08	3.19431e+08	165007461	290854542	1.69107e+08	126239026	2.05023e+08	3.14418e+08	1.5222e+08	1.55194e+08	1.5197e+08
1250NEG		Cer(d18:2/23:0)+HCOO	Cer(d41:2)+HCOO	Cer	(d18:2/23:0)	(d18:2)	(23:0)			C42 H80 O5 N1	678.604	15.7484	0.0314733	1.25875	0.0431215	0.496469	6.25167e+07	8.71978e+07	6.02747e+07	3.70745e+07	4.52455e+07	6.1753e+07	6.12579e+07	6.03736e+07	6.05745e+07	5.66664e+07	5.66861e+07	7.03859e+07	5.88057e+07	6.2309e+07	6.19201e+07
1251NEG		Cer(d18:1/23:0)+HCOO	Cer(d41:1)+HCOO	Cer	(d18:1/23:0)	(d18:1)	(23:0)			C42 H82 O5 N1	680.62	16.8491	0.0208924	1.30292	0.0558445	0.371614	3.0554e+07	4.2525e+07	3.11762e+07	1.9514e+07	1.96914e+07	2.98651e+07	2.48565e+07	3.50884e+07	2.90853e+07	3.06503e+07	2.92846e+07	4.33665e+07	2.90968e+07	3.02187e+07	3.01268e+07
1253NEG		Cer(d17:0+pO/23:0)+HCOO	Cer(d40:0+pO)+HCOO	Cer	(d17:0+pO/23:0)	(d17:0+pO)	(23:0)			C41 H82 O6 N1	684.615	15.438	0.038336	1.4415	0.138654	0.284488	7.77635e+06	2.02514e+07	8.9334e+06	6.14484e+06	6.85524e+06	9.25432e+06	8.27789e+06	7.52186e+06	6.39484e+06	8.51767e+06	8.09243e+06	8.87206e+06	8.7354e+06	9.38669e+06	9.28426e+06
1254NEG		PE(14:0/18:2)-H	PE(32:2)-H	PE	(14:0/18:2)	(14:0)	(18:2)			C37 H69 O8 N1 P1	686.477	9.678	0.0165968	1.37584	0.107126	0.25905	4.06649e+06	8.07257e+06	6.07139e+06	4.51536e+06	6.2281e+06	4.57477e+06	1.1199e+07	1.11354e+07	8.00974e+06	6.89554e+06	7.66366e+06	1.0374e+07	8.11592e+06	8.36476e+06	8.14423e+06
1255NEG		Cer(d18:1/24:4)+HCOO	Cer(d42:5)+HCOO	Cer	(d18:1/24:4)	(d18:1)	(24:4)			C43 H76 O5 N1	686.573	12.706	0.0409523	3.47305	0.00341345	0.604002	2.90704e+06	2.24612e+07	1.33618e+07	1.74872e+06	8.18378e+06	9.35663e+06	8.10878e+06	1.15565e+07	2.38327e+06	3.02501e+06	3.31058e+06	1.00286e+07	8.81427e+06	9.4874e+06	9.45213e+06
1256NEG		PE(16:0/16:1)-H	PE(32:1)-H	PE	(16:0/16:1)	(16:0)	(16:1)			C37 H71 O8 N1 P1	688.492	10.678	0.0123929	2.05174	0.0020643	0.959281	1.9846e+07	7.13146e+07	3.69229e+07	2.50882e+07	2.81569e+07	3.43516e+07	5.41686e+07	4.73952e+07	2.10654e+07	2.10229e+07	2.25148e+07	3.83591e+07	3.43404e+07	3.51024e+07	3.50732e+07
125POS		Co(Q6)+H	Co(Q6)+H	Co	(Q6)	(Q6)				C39 H59 O4	591.441	15.9044	0.0132076	1.38991	0.0481208	0.145594	3.52024e+07	4.44283e+07	6.38636e+07	2.82999e+07	5.9491e+07	4.41254e+07	4.68503e+07	5.93089e+07	3.1338e+07	2.49464e+07	4.98137e+07	5.98392e+07	2.09133e+07	2.04622e+07	2.04243e+07
1261NEG		Cer(d42:2)+HCOO	Cer(d42:2)+HCOO	Cer	(d42:2)	(d42:2)				C43 H82 O5 N1	692.62	15.428	0.0373743	2.1291	0.00144561	0.653725	6.62285e+06	2.44001e+07	1.80639e+07	7.65943e+06	1.50769e+07	1.67397e+07	2.68539e+07	2.17047e+07	8.42484e+06	1.35099e+07	6.10777e+06	1.44518e+07	1.44327e+07	1.44813e+07	1.54126e+07
1262NEG		Cer(d42:1)+HCOO	Cer(d42:1)+HCOO	Cer	(d18:0/24:1)	(d18:0)	(24:1)			C43 H84 O5 N1	694.635	16.7696	0.0207771	1.29147	0.0569197	0.730734	6.02692e+07	1.22955e+08	9.25014e+07	6.47858e+07	1.00932e+08	8.86727e+07	9.58809e+07	9.24642e+07	8.83584e+07	8.80885e+07	4.59898e+07	8.6654e+07	8.79469e+07	8.97854e+07	9.16785e+07
1263NEG		Cer(d18:1/24:0)+HCOO	Cer(d42:1)+HCOO	Cer	(d18:1/24:0)	(d18:1)	(24:0)			C43 H84 O5 N1	694.635	17.8702	0.0145214	0.654853	0.241539	2.7376	8.37975e+08	4.8255e+07	1222897778	9.12058e+08	9.36945e+08	1039467553	1270297379	3.33082e+07	8.31073e+08	1045902547	1027325870	4.72382e+07	1061384726	1062340110	1088783158
1264NEG		PE(34:2p)-H	PE(34:2p)-H	PE	(34:2p)	(34:2p)				C39 H73 O7 N1 P1	698.513	11.536	0.0151668	1.49187	0.0269087	0.545247	1.66512e+07	3.86387e+07	2.82823e+07	1.75364e+07	2.05454e+07	1.84264e+07	3.75079e+07	2.14022e+07	1.71498e+07	2.00578e+07	2.02611e+07	2.3133e+07	2.33218e+07	2.3349e+07	2.39534e+07
1265NEG		PE(34:1p)-H	PE(34:1p)-H	PE	(34:1p)	(34:1p)				C39 H75 O7 N1 P1	700.529	12.61	0.009201	1.73704	0.0181963	0.806236	2.10247e+07	7.24939e+07	4.71374e+07	4.45056e+07	2.74227e+07	2.91633e+07	6.78577e+07	4.59833e+07	2.66432e+07	2.80805e+07	2.60977e+07	3.92175e+07	4.11809e+07	4.18453e+07	4.11901e+07
1266NEG		PE(17:1/16:0)-H	PE(33:1)-H	PE	(17:1/16:0)	(17:1)	(16:0)			C38 H73 O8 N1 P1	702.508	11.28	0.0117728	1.63679	0.0637014	0.288146	4.29125e+06	1.36242e+07	4.30634e+06	6.38628e+06	4.66889e+06	4.11322e+06	8.90069e+06	9.44689e+06	5.10176e+06	4.6018e+06	4.23626e+06	7.54422e+06	6.30532e+06	6.29963e+06	6.17492e+06
1267NEG		PE(34:0p)-H	PE(34:0p)-H	PE	(34:0p)	(34:0p)				C39 H77 O7 N1 P1	702.544	13.966	0.00798277	1.57977	0.0208925	0.152694	1.13677e+06	3.24978e+06	2.25471e+06	2.73299e+06	1.41312e+06	1.5526e+06	2.35738e+06	2.86808e+06	1.43908e+06	1.44587e+06	1.34983e+06	2.75315e+06	2.13084e+06	2.1622e+06	2.15864e+06
1268NEG		PE(34:0p)-H	PE(34:0p)-H	PE	(34:0p)	(34:0p)				C39 H77 O7 N1 P1	702.544	12.7902	0.0450845	1.93461	0.0201724	0.411471	3.67436e+06	1.64294e+07	9.52428e+06	4.93612e+06	7.11111e+06	6.59273e+06	1.17486e+07	7.72998e+06	4.48177e+06	5.00505e+06	4.65206e+06	5.74322e+06	7.08002e+06	7.64687e+06	7.07855e+06
1269NEG		PE(34:0e)-H	PE(34:0e)-H	PE	(34:0e)	(34:0e)				C39 H79 O7 N1 P1	704.56	14.169	0.0324937	1.73639	0.00788765	0.14883	1.16986e+06	2.83634e+06	1.86406e+06	1.10882e+06	756650	1.70688e+06	1.59706e+06	1.25928e+06	1.21368e+06	1.3723e+06	800641	1.88739e+06	1.7685e+06	1.66952e+06	1.76573e+06
126POS		LPC(22:5)+Na	LPC(22:5)+Na	LPC	(22:5)	(22:5)				C30 H52 O7 N1 P1 Na1	592.337	2.39455	0.0697255	2.86078	0.00828604	0.151497	7.40675e+06	2.28856e+07	1.27969e+07	2.03076e+06	5.99398e+06	9.04497e+06	6.7486e+06	2.03484e+07	7.65625e+06	1.26475e+06	5.28158e+06	1.2952e+07	7.38754e+06	8.2755e+06	7.31728e+06
1270NEG		Cer(d18:1/25:1)+HCOO	Cer(d43:2)+HCOO	Cer	(d18:1/25:1)	(d18:1)	(25:1)			C44 H84 O5 N1	706.635	16.983	0.0254712	2.28281	0.000258758	0.961486	1.72022e+07	4.91734e+07	4.71835e+07	1.21622e+07	2.11826e+07	2.75563e+07	3.03107e+07	4.42811e+07	1.80411e+07	1.65616e+07	1.67945e+07	3.42139e+07	2.69158e+07	2.69904e+07	2.81582e+07
1271NEG		Cer(d18:2/25:0)+HCOO	Cer(d43:2)+HCOO	Cer	(d18:2/25:0)	(d18:2)	(25:0)			C44 H84 O5 N1	706.635	17.3	0.0316667	2.13886	0.00194714	0.321616	2.90079e+06	8.11237e+06	4.61478e+06	1.63439e+06	2.74815e+06	3.90388e+06	4.18322e+06	5.33137e+06	2.48618e+06	2.18296e+06	2.42023e+06	4.59558e+06	4.02757e+06	4.0502e+06	4.26367e+06
1272NEG		Cer(d18:0+pO/24:2)+HCOO	Cer(d42:2+pO)+HCOO	Cer	(d18:0+pO/24:2)	(d18:0+pO)	(24:2)			C43 H82 O6 N1	708.615	14.0149	0.0380859	2.7998	0.00798799	0.341133	1.48182e+06	9.3653e+06	3.76841e+06	1.17558e+06	2.61769e+06	3.99296e+06	3.99152e+06	4.41608e+06	1.3092e+06	1.67848e+06	2.09832e+06	3.47471e+06	3.77011e+06	4.02623e+06	4.03409e+06
1273NEG		Cer(d18:1/25:0)+HCOO	Cer(d43:1)+HCOO	Cer	(d18:1/25:0)	(d18:1)	(25:0)			C44 H86 O5 N1	708.651	18.5999	0.226781	1.04214	0.864439	0.311141	1.829e+07	1.53581e+07	3.5851e+07	1.64207e+07	2.10814e+07	3.26962e+07	8.05826e+06	1.21547e+07	2.06664e+07	1.87836e+07	2.19676e+07	1.80312e+07	2.32362e+07	1.57934e+07	1.62285e+07
1274NEG		PE(14:0/20:4)-H	PE(34:4)-H	PE	(14:0/20:4)	(14:0)	(20:4)			C39 H69 O8 N1 P1	710.477	9.448	0.0169281	1.19078	0.249446	0.164489	4.44615e+06	8.45939e+06	4.7265e+06	4.32619e+06	6.67756e+06	4.4837e+06	7.46976e+06	8.38396e+06	6.91241e+06	6.77588e+06	6.22309e+06	8.58424e+06	5.97208e+06	6.15037e+06	6.15099e+06
1275NEG		Cer(d18:0+pO/24:1)+HCOO	Cer(d42:1+pO)+HCOO	Cer	(d18:0+pO/24:1)	(d18:0+pO)	(24:1)			C43 H84 O6 N1	710.63	15.3489	0.053779	1.93824	0.0147551	0.68301	1.7085e+07	5.13746e+07	2.53039e+07	1.0066e+07	1.79493e+07	2.2744e+07	2.33258e+07	2.38854e+07	1.39485e+07	1.42358e+07	1.52918e+07	2.50486e+07	2.23631e+07	2.47168e+07	2.44195e+07
1276NEG		PE(16:0/18:3)-H	PE(34:3)-H	PE	(16:0/18:3)	(16:0)	(18:3)			C39 H71 O8 N1 P1	712.492	10.0769	0.131797	1.5419	0.129329	0.524683	3.00478e+07	2.49403e+07	2.68785e+07	1.12687e+07	1.84114e+07	16389524	2.7829e+07	5.64463e+07	1.8312e+07	1.74205e+07	1.82493e+07	2.28455e+07	3.08956e+07	2.46711e+07	2.48824e+07
1277NEG		PE(16:0/18:3)-H	PE(34:3)-H	PE	(16:0/18:3)	(16:0)	(18:3)			C39 H71 O8 N1 P1	712.492	9.7365	0.00873828	0.922712	0.562506	0.482488	6.60617e+07	8.9084e+07	4.79328e+07	6.26226e+07	8.50196e+07	5.83844e+07	1.00733e+08	7.58031e+07	8.80718e+07	8.66974e+07	1.09166e+08	8.72407e+07	7.85667e+07	7.97562e+07	7.97793e+07
1278NEG		Cer(d17:0+pO/25:0)+HCOO	Cer(d42:0+pO)+HCOO	Cer	(d17:0+pO/25:0)	(d17:0+pO)	(25:0)			C43 H86 O6 N1	712.646	17.005	0.02666	1.83731	0.0166844	0.518542	9.23835e+06	3.11e+07	1.7678e+07	8.70226e+06	8.70289e+06	1.39481e+07	1.40761e+07	1.37323e+07	9.28022e+06	1.09903e+07	1.05415e+07	1.50291e+07	1.3361e+07	1.40325e+07	1.39553e+07
1279NEG		PE(16:0/18:2)-H	PE(34:2)-H	PE	(16:0/18:2)	(16:0)	(18:2)			C39 H73 O8 N1 P1	714.508	10.926	0.00785168	0.900125	0.0903099	2.85253	1640285816	1538517329	1430096972	1753731411	1834285014	1652987571	1905977059	1780366368	1803546874	2055497936	2073243683	1737978800	1809658763	1824898821	1838286116
127POS		Cer(d18:2/20:0)+H	Cer(d38:2)+H	Cer	(d18:2/20:0)	(d18:2)	(20:0)			C38 H74 O3 N1	592.566	12.1493	0.0207919	3.22332	0.0006621	0.330868	1.4937e+07	6.97989e+07	5.11625e+07	8.39526e+06	2.40198e+07	2.82621e+07	6.68939e+07	5.04952e+07	1.25367e+07	1.09398e+07	2.32247e+07	3.65507e+07	1.66733e+07	1.60914e+07	1.60825e+07
1281NEG		PE(18:0/16:0)-H	PE(34:0)-H	PE	(18:0/16:0)	(18:0)	(16:0)			C39 H77 O8 N1 P1	718.539	13.136	0.018106	1.86554	0.00328264	0.689731	1.35035e+07	2.50048e+07	2.20928e+07	1.34033e+07	1.99257e+07	2.25226e+07	2.49995e+07	2.94235e+07	1.5622e+07	1.46539e+07	1.22992e+07	4.27502e+07	2.14118e+07	2.20956e+07	2.1422e+07
1282NEG		Cer(d18:1/26:2)+HCOO	Cer(d44:3)+HCOO	Cer	(d18:1/26:2)	(d18:1)	(26:2)			C45 H84 O5 N1	718.635	16.389	0.0126897	3.48072	0.00204829	0.449309	1.95622e+06	1.14626e+07	7.47345e+06	1.41932e+06	2.52793e+06	3.82805e+06	6.91752e+06	7.22705e+06	1.67395e+06	2.07697e+06	2.03337e+06	3.77317e+06	4.40596e+06	4.40741e+06	4.50425e+06
1283NEG		PG(16:0/16:1)-H	PG(32:1)-H	PG	(16:0/16:1)	(16:0)	(16:1)			C38 H72 O10 N0 P1	719.487	9.392	0.0251564	1.02747	0.793007	0.0682999	3.55527e+06	4.82708e+06	3.82674e+06	3.92384e+06	3.63223e+06	2.85639e+06	3.77647e+06	4.29018e+06	3.49356e+06	3.97168e+06	5.20393e+06	4.85699e+06	3.84649e+06	4.01834e+06	4.01987e+06
1284NEG		PE(36:5p)-H	PE(36:5p)-H	PE	(36:5p)	(36:5p)				C41 H71 O7 N1 P1	720.497	10.485	0.0203082	1.33211	0.0222777	0.371351	1.24623e+07	2.37006e+07	1.54169e+07	1.39001e+07	1.66235e+07	1.60056e+07	1.6352e+07	2.03335e+07	1.18348e+07	1.15845e+07	1.34037e+07	1.45057e+07	1.45285e+07	1.4551e+07	1.50569e+07
1285NEG		Cer(d16:0/28:2)+HCOO	Cer(d44:2)+HCOO	Cer	(d16:0/28:2)	(d16:0)	(28:2)			C45 H86 O5 N1	720.651	17.715	0.0267926	2.55221	0.0236605	0.506868	4.05293e+06	1.91371e+07	1.39714e+07	3.53082e+06	5.76076e+06	9.04012e+06	1.21405e+07	1.24352e+07	3.97945e+06	4.44904e+06	4.5547e+06	469496	8.64855e+06	8.68341e+06	9.07332e+06
1286NEG		PG(16:0/16:0)-H	PG(32:0)-H	PG	(16:0/16:0)	(16:0)	(16:0)			C38 H74 O10 N0 P1	721.503	10.468	0.0198548	1.52997	0.0150081	0.473424	1.24752e+07	2.30491e+07	2.60559e+07	1.21384e+07	1.22814e+07	1.35878e+07	1.58758e+07	2.13694e+07	1.18119e+07	1.38975e+07	1.13073e+07	1.31453e+07	1.51282e+07	1.56613e+07	1.56601e+07
1288NEG		PE(36:3p)-H	PE(36:3p)-H	PE	(36:3p)	(36:3p)				C41 H75 O7 N1 P1	724.529	11.865	0.0249783	1.33846	0.11718	0.354617	1.11899e+07	2.39228e+07	2.05231e+07	1.38865e+07	1.41526e+07	1.11698e+07	2.91338e+07	1.62435e+07	1.46419e+07	1.8027e+07	1.43966e+07	1.45085e+07	1.67095e+07	1.67108e+07	1.59975e+07
1289NEG		PE(16:0e/20:4)-H	PE(36:4e)-H	PE	(16:0e/20:4)	(16:0e)	(20:4)			C41 H75 O7 N1 P1	724.529	11.512	0.016349	3.04003	0.0114311	0.922036	9.15824e+06	6.17754e+07	4.33502e+07	7.12442e+06	1.30892e+07	3.08383e+07	3.19698e+07	2.06272e+07	1.06064e+07	1.20675e+07	13848287	1.17587e+07	2.02412e+07	2.0819e+07	2.02396e+07
128POS		DG(16:0/18:2)+H	DG(34:2)+H	DG	(16:0/18:2)	(16:0)	(18:2)			C37 H69 O5	593.514	11.9541	0.0198807	1.50959	0.0528218	0.235823	3.45274e+07	3.32319e+07	7.39031e+07	3.12899e+07	7.61252e+07	8.21896e+07	7.93928e+07	7.34995e+07	4.15873e+07	3.08252e+07	6.30351e+07	7.65281e+07	3.48821e+07	3.40945e+07	3.35296e+07
1290NEG		PE(36:2p)-H	PE(36:2p)-H	PE	(36:2p)	(36:2p)				C41 H77 O7 N1 P1	726.544	12.697	0.0366057	1.30568	0.0875735	0.437866	1.74236e+07	3.68552e+07	4.16868e+07	4.33608e+07	3.53628e+07	2.52463e+07	45215803	4.56303e+07	3.09598e+07	2.62633e+07	2.48793e+07	3.81031e+07	3.40433e+07	3.62454e+07	3.40378e+07
1291NEG		Cer(d18:0+pO/25:0)+HCOO	Cer(d43:0+pO)+HCOO	Cer	(d18:0+pO/25:0)	(d18:0+pO)	(25:0)			C44 H88 O6 N1	726.662	17.754	0.0308592	1.45666	0.227006	0.107544	1.22195e+06	276472	1.24894e+06	522197	574648	1.90091e+06	586288	1.26844e+06	597868	764034	643163	1.01733e+06	903769	944038	959764
1292NEG		PE(17:0/18:2)-H	PE(35:2)-H	PE	(17:0/18:2)	(17:0)	(18:2)			C40 H75 O8 N1 P1	728.524	11.353	0.0231172	0.996352	0.979344	0.228556	2.72105e+07	4.10566e+07	30811476	2.40474e+07	3.01779e+07	2.86013e+07	4.5231e+07	3.86774e+07	4.41075e+07	4.85127e+07	4.36671e+07	3.25512e+07	3.43001e+07	3.57137e+07	3.57087e+07
1293NEG		PE(36:1p)-H	PE(36:1p)-H	PE	(36:1p)	(36:1p)				C41 H79 O7 N1 P1	728.56	12.8424	0.0243071	1.36598	0.320575	0.183422	2.88914e+06	7.55311e+06	5.39245e+06	4.11104e+06	944834	844306	2.30363e+06	6.98137e+06	3.90945e+06	4.41031e+06	4.46755e+06	5.24509e+06	4.63317e+06	4.83161e+06	4.63433e+06
1294NEG		PE(36:2e)-H	PE(36:2e)-H	PE	(36:2e)	(36:2e)				C41 H79 O7 N1 P1	728.56	13.113	0.0228952	1.75676	0.00807277	0.504303	1.02463e+07	2.67591e+07	1.41315e+07	7.86968e+06	1.08874e+07	1.19271e+07	2.05511e+07	1.37494e+07	1.015e+07	1.09026e+07	1.00003e+07	1.83862e+07	1.43597e+07	1.49403e+07	1.49488e+07
1295NEG		PE(36:1p)-H	PE(36:1p)-H	PE	(36:1p)	(36:1p)				C41 H79 O7 N1 P1	728.56	14.049	0.0127149	1.39834	0.101971	0.338273	7.06798e+06	2.28535e+07	1.59536e+07	1.93594e+07	1.27989e+07	9.64682e+06	2.17199e+07	1.8163e+07	1.11076e+07	1.14165e+07	1.055e+07	1.27636e+07	1.47297e+07	1.50585e+07	1.47337e+07
1296NEG		PE(17:0/18:1)-H	PE(35:1)-H	PE	(17:0/18:1)	(17:0)	(18:1)			C40 H77 O8 N1 P1	730.539	12.558	0.00416045	1.86648	0.0505515	0.574335	9.42285e+06	4.29544e+07	13564757	1.2426e+07	1.16367e+07	1.18389e+07	1.89913e+07	2.8048e+07	1.26453e+07	1.32646e+07	1.332e+07	20324754	1.71447e+07	1.72691e+07	1.72686e+07
1297NEG		PE(36:1e)-H	PE(36:1e)-H	PE	(36:1e)	(36:1e)				C41 H81 O7 N1 P1	730.576	14.279	0.0291453	2.13734	0.00894784	0.397734	3.09659e+06	1.43233e+07	7.92886e+06	3.69826e+06	4.66044e+06	5.98372e+06	9.11318e+06	6.1363e+06	3.75601e+06	4.40806e+06	3.45826e+06	5.83942e+06	5.88971e+06	6.1958e+06	6.19894e+06
1298NEG		SM(d17:1/16:0)+HCOO	SM(d33:1)+HCOO	SM	(d17:1/16:0)	(d17:1)	(16:0)			C39 H78 O8 N2 P1	733.55	9.569	0.00426253	1.06933	0.565197	0.0987447	9.11281e+06	1.16014e+07	7.44821e+06	6.95601e+06	7.97115e+06	7.55547e+06	8.67918e+06	1.02937e+07	1.04306e+07	9.35526e+06	1.06459e+07	1.26704e+07	9.77969e+06	9.69768e+06	9.72765e+06
1299NEG		PE(14:0/22:6)-H	PE(36:6)-H	PE	(14:0/22:6)	(14:0)	(22:6)			C41 H69 O8 N1 P1	734.477	8.8584	0.00378777	1.32831	0.041256	0.312255	8.44644e+06	1.75207e+07	1.35775e+07	9.45011e+06	1.12706e+07	1.01492e+07	1.50387e+07	1.50323e+07	1.26404e+07	1.40347e+07	1.27167e+07	1.97493e+07	1.29283e+07	1.30135e+07	1.30134e+07
129POS		PC(23:0e)+H	PC(23:0e)+H	PC	(23:0e)	(23:0e)				C31 H65 O7 N1 P1	594.449	7.70263	0.0254601	1.81211	0.019272	0.0754477	2.95319e+06	4.38313e+06	6.78108e+06	2.21522e+06	4.75064e+06	4.71247e+06	5.33272e+06	6.01105e+06	3.03888e+06	2.8554e+06	4.95097e+06	1.04067e+07	2.9544e+06	2.95908e+06	2.8283e+06
12POS		AcCa(14:0)+H	AcCa(14:0)+H	AcCa	(14:0)	(14:0)				C21 H42 O4 N1	372.311	2.21923	0.0149796	2.26463	0.00425059	0.151827	6.83328e+06	9.91659e+06	1.74023e+07	2.76413e+06	1.02999e+07	9.65923e+06	1.99224e+07	1.2576e+07	4.99548e+06	5.72244e+06	8.96508e+06	2.01583e+07	6.36269e+06	6.36356e+06	6.19945e+06
1301NEG		PE(16:1/20:4)-H	PE(36:5)-H	PE	(16:1/20:4)	(16:1)	(20:4)			C41 H71 O8 N1 P1	736.492	9.29557	0.0216267	0.583434	0.032523	0.355134	4.6171e+06	4.31067e+06	3.78944e+06	7.55187e+06	7.55867e+06	6.15955e+06	5.49788e+06	4.18076e+06	7.54174e+06	1.16437e+07	1.40689e+07	6.97321e+06	6.83439e+06	7.09014e+06	6.82779e+06
1303NEG		PE(18:1/18:3)-H	PE(36:4)-H	PE	(18:1/18:3)	(18:1)	(18:3)			C41 H73 O8 N1 P1	738.508	10.717	0.00868919	0.944575	0.139983	2.97536	2619533041	2532157874	2012345003	2428205362	2593358102	2502275268	2513385464	2481754409	2461784226	2628066381	2566323119	2407500245	2502028519	2514430278	2544608776
1304NEG		PE(16:0/20:3)-H	PE(36:3)-H	PE	(16:0/20:3)	(16:0)	(20:3)			C41 H75 O8 N1 P1	740.524	11.0173	0.00949285	1.0076	0.94168	0.811668	7.79066e+08	9.95038e+08	5.11386e+08	6.19857e+08	7.33014e+08	6.79606e+08	7.98676e+08	7.43958e+08	7.63656e+08	8.45242e+08	8.53197e+08	9.00297e+08	758197797	762252254	7.7229e+08
1305NEG		PE(18:0/18:3)-H	PE(36:3)-H	PE	(18:0/18:3)	(18:0)	(18:3)			C41 H75 O8 N1 P1	740.524	11.498	0.0352282	1.67055	0.0342388	0.613792	1.58537e+07	3.65547e+07	4.63086e+07	1.37961e+07	2.01591e+07	1.75825e+07	2.46416e+07	2.0842e+07	1.7695e+07	1.63329e+07	1.69067e+07	2.2367e+07	2.09162e+07	2.03177e+07	2.17893e+07
1306NEG		PE(36:2)-H	PE(36:2)-H	PE	(36:2)	(36:2)				C41 H77 O8 N1 P1	742.539	10.586	0.0277297	0.87892	0.0166809	0.840238	1.05955e+08	9.49489e+07	1.09997e+08	108921087	1.27653e+08	1.08473e+08	1.02679e+08	1.07044e+08	1.16428e+08	1.31769e+08	1.28621e+08	1.09106e+08	1.07291e+08	1.1264e+08	1.12588e+08
1307NEG		PE(18:0/18:2)-H	PE(36:2)-H	PE	(18:0/18:2)	(18:0)	(18:2)			C41 H77 O8 N1 P1	742.539	12.173	0.0101505	0.937573	0.383924	2.59582	2055989861	1730175727	1642385429	1908850775	2462667592	2170461022	2398090439	1998789445	2027877411	2152920702	2365624543	2224109142	2146277542	2184758766	2184152164
1308NEG		PG(16:1/18:2)-H	PG(34:3)-H	PG	(16:1/18:2)	(16:1)	(18:2)			C40 H72 O10 N0 P1	743.487	8.36015	0.0110252	1.55906	0.0235772	0.230519	3.55655e+06	5.09359e+06	4.48892e+06	1.5931e+06	2.55922e+06	1.9518e+06	4.24063e+06	5.12182e+06	2.14109e+06	3.19437e+06	2.98715e+06	4.09723e+06	3.22828e+06	3.29049e+06	3.29094e+06
130POS		Cer(d18:1/20:0)+H	Cer(d38:1)+H	Cer	(d18:1/20:0)	(d18:1)	(20:0)			C38 H76 O3 N1	594.582	13.1711	0.0188027	1.97301	0.000569952	0.52689	9.00382e+07	2.32577e+08	2.32887e+08	6.92719e+07	1.38188e+08	1.31296e+08	2.20791e+08	2.02089e+08	8.73968e+07	8.70735e+07	1.35301e+08	1.78511e+08	8.69786e+07	8.59764e+07	8.38285e+07
1310NEG		PE(36:1)-H	PE(36:1)-H	PE	(36:1)	(36:1)				C41 H79 O8 N1 P1	744.555	11.519	0.00881415	1.12882	0.0569374	0.364973	5.76043e+07	9.01036e+07	6.65259e+07	6.72828e+07	6.38246e+07	7.07145e+07	6.74965e+07	7.41998e+07	6.79395e+07	6.96776e+07	6.6142e+07	7.39892e+07	6.97625e+07	7.08412e+07	7.08358e+07
1311NEG		PE(36:1)-H	PE(36:1)-H	PE	(36:1)	(36:1)				C41 H79 O8 N1 P1	744.555	10.9198	0.0113025	1.54276	0.0304939	0.740655	2.98678e+07	4.42114e+07	8.23604e+07	2.40748e+07	3.42348e+07	4.42508e+07	4.73765e+07	4.13371e+07	3.06052e+07	3.19385e+07	4.95021e+07	4.93598e+07	4.06868e+07	4.06999e+07	4.14951e+07
1313NEG		SM(d34:2)+HCOO	SM(d34:2)+HCOO	SM	(d34:2)	(d34:2)				C40 H78 O8 N2 P1	745.55	9.248	0.0160203	1.0228	0.824733	0.122319	9.43155e+06	10745731	9.739e+06	8.85278e+06	1.31469e+07	7.84457e+06	1.05155e+07	9.36181e+06	1.0291e+07	9.65778e+06	8.94349e+06	1.34923e+07	9.49966e+06	9.76699e+06	9.76945e+06
1314NEG		PC(12:0/18:2)+HCOO	PC(30:2)+HCOO	PC	(12:0/18:2)	(12:0)	(18:2)			C39 H73 O10 N1 P1	746.498	7.90204	0.0231045	1.4895	0.144695	0.0788796	305506	726069	835190	335852	547854	436630	761535	1.34939e+06	887289	989332	608005	1.36337e+06	688432	716691	716783
1316NEG		PE(18:0/18:0)-H	PE(36:0)-H	PE	(18:0/18:0)	(18:0)	(18:0)			C41 H81 O8 N1 P1	746.571	14.601	0.0139312	1.10477	0.317526	0.0679657	2.71172e+06	2.96608e+06	3.43685e+06	3.42892e+06	3.78613e+06	3.35806e+06	3.29581e+06	3.39198e+06	3.18352e+06	3.43592e+06	2.72882e+06	4.84575e+06	3.5509e+06	3.63855e+06	3.55343e+06
1317NEG		PE(36:0)-H	PE(36:0)-H	PE	(36:0)	(36:0)				C41 H81 O8 N1 P1	746.571	12.721	0.026075	1.15974	0.0462046	0.100563	2.19366e+06	3.6871e+06	2.70096e+06	2.65272e+06	2.66883e+06	2.80964e+06	3.0843e+06	3.09478e+06	2.50929e+06	2.65773e+06	2.8507e+06	2.6374e+06	2.72726e+06	2.60422e+06	2.72362e+06
1318NEG		PG(16:0/18:1)-H	PG(34:1)-H	PG	(16:0/18:1)	(16:0)	(18:1)			C40 H76 O10 N0 P1	747.518	10.4722	0.0233354	0.951395	0.514241	1.68234	1314967532	1432589771	1077161652	1273713330	1786205338	1445887507	1374306605	1336789506	1387584239	1467855244	1481799841	1621938451	1374845089	1431425076	1375333422
131POS		DG(16:0/18:1)+H	DG(34:1)+H	DG	(16:0/18:1)	(16:0)	(18:1)			C37 H71 O5	595.53	12.873	0.02262	2.07227	0.0022804	0.173008	1.31558e+07	1.12733e+07	2.08515e+07	7.65734e+06	1.42314e+07	2.40867e+07	2.16343e+07	1.95594e+07	1.02381e+07	2.33905e+06	9.04639e+06	2.00261e+07	5.99958e+06	6.00689e+06	5.77115e+06
1320NEG		PE(15:0/22:6)-H	PE(37:6)-H	PE	(15:0/22:6)	(15:0)	(22:6)			C42 H71 O8 N1 P1	748.492	9.721	0.0116283	0.937073	0.503968	0.331256	2.82776e+07	3.70685e+07	2.48312e+07	2.57141e+07	3.0542e+07	2.37102e+07	2.68118e+07	3.41672e+07	3.17122e+07	3.87459e+07	3.37634e+07	3.02884e+07	2.9311e+07	2.99085e+07	2.99103e+07
1322NEG		PE(16:0p/22:5)-H	PE(38:5p)-H	PE	(16:0p/22:5)	(16:0p)	(22:5)			C43 H75 O7 N1 P1	748.529	11.786	0.0153531	1.43997	0.046454	0.883293	4.19822e+07	1.03688e+08	6.12822e+07	5.42761e+07	6.31474e+07	4.55638e+07	9.37262e+07	8.37693e+07	4.61019e+07	4.60208e+07	5.69825e+07	5.62164e+07	5.65955e+07	5.80966e+07	5.81569e+07
1323NEG		SM(d34:0)+HCOO	SM(d34:0)+HCOO	SM	(d34:0)	(d34:0)				C40 H82 O8 N2 P1	749.581	10.725	0.0116788	0.704213	0.201078	0.796617	2.35301e+07	3.40882e+07	3.218e+07	7.5982e+07	8.6358e+07	7.63066e+07	4.04193e+07	3.64959e+07	6.18288e+07	7.87263e+07	3.06575e+07	3.19722e+07	5.15791e+07	5.15967e+07	5.26384e+07
1324NEG		PE(18:0p/20:4)-H	PE(38:4p)-H	PE	(18:0p/20:4)	(18:0p)	(20:4)			C43 H77 O7 N1 P1	750.544	12.618	0.00745679	1.09611	0.177986	0.912239	296148103	4.00502e+08	3.89842e+08	335363960	3.90876e+08	3.04702e+08	438204037	4.15073e+08	3.49465e+08	3.66718e+08	3.8026e+08	3.74141e+08	374461577	3.79333e+08	3.74491e+08
1326NEG		PE(17:0/20:4)-H	PE(37:4)-H	PE	(17:0/20:4)	(17:0)	(20:4)			C42 H75 O8 N1 P1	752.524	11.125	0.0105045	1.14515	0.429468	0.249323	1.30043e+07	2.478e+07	1.14803e+07	1.03141e+07	1.47357e+07	1.14454e+07	1.47264e+07	2.23592e+07	1.90884e+07	1.45298e+07	1.63392e+07	1.59951e+07	1.63682e+07	1.66728e+07	1.63781e+07
1327NEG		PE(18:0e/20:4)-H	PE(38:4e)-H	PE	(18:0e/20:4)	(18:0e)	(20:4)			C43 H79 O7 N1 P1	752.56	12.842	0.022186	2.36502	0.0871348	1.18779	2.48807e+07	1.17898e+08	6.06796e+07	2.90222e+07	4.58009e+07	7.3148e+07	226140344	6.16414e+07	3.65308e+07	4.19631e+07	6.38775e+07	3.30063e+07	5.50335e+07	5.73144e+07	5.53307e+07
1328NEG		PE(38:3p)-H	PE(38:3p)-H	PE	(38:3p)	(38:3p)				C43 H79 O7 N1 P1	752.56	13.227	0.008529	1.48577	0.13232	0.478367	1.39614e+07	3.75008e+07	1.62342e+07	1.75347e+07	2.50605e+07	1.89544e+07	5.06801e+07	2.59257e+07	1.84203e+07	1.97504e+07	1.93998e+07	2.02718e+07	2.29892e+07	2.33468e+07	2.30239e+07
1329NEG		PE(18:0p/20:3)-H	PE(38:3p)-H	PE	(18:0p/20:3)	(18:0p)	(20:3)			C43 H79 O7 N1 P1	752.56	13.692	0.0447911	1.03979	0.781511	0.0708263	2.28809e+06	4.75023e+06	3.997e+06	3.59901e+06	4.80229e+06	3.5917e+06	4.94859e+06	2.52669e+06	3.70323e+06	3.57798e+06	3.99177e+06	3.02212e+06	3.14354e+06	3.39487e+06	3.14537e+06
132POS		Cer(d18:0/20:0)+H	Cer(d38:0)+H	Cer	(d18:0/20:0)	(d18:0)	(20:0)			C38 H78 O3 N1	596.598	13.6194	0.0338522	1.10705	0.596754	0.0863808	5.79404e+06	1.01121e+07	1.5656e+07	9.00576e+06	1.73821e+07	1.23833e+07	1.11585e+07	1.28058e+07	9.15342e+06	1.4943e+07	7.64585e+06	8.65138e+06	7.33624e+06	6.92816e+06	6.91662e+06
1330NEG		PE(17:0/20:3)-H	PE(37:3)-H	PE	(17:0/20:3)	(17:0)	(20:3)			C42 H77 O8 N1 P1	754.539	11.851	0.0512037	1.16169	0.492555	0.179791	6.27298e+06	1.25161e+07	4.82349e+06	3.46363e+06	7.26775e+06	4.2753e+06	6.91612e+06	7.18543e+06	8.02357e+06	6.76848e+06	4.6944e+06	6.67456e+06	7.44302e+06	6.83915e+06	6.80195e+06
1331NEG		PE(38:2p)-H	PE(38:2p)-H	PE	(38:2p)	(38:2p)				C43 H81 O7 N1 P1	754.576	14.363	0.0229266	1.39164	0.0229681	0.315911	5.65007e+06	9.2517e+06	1.06938e+07	1.13401e+07	1.06749e+07	1.17533e+07	1.61704e+07	1.22174e+07	7.9616e+06	8.6e+06	7.91789e+06	1.248e+07	1.02213e+07	10636436	1.06401e+07
1332NEG		PE(19:0/18:2)-H	PE(37:2)-H	PE	(19:0/18:2)	(19:0)	(18:2)			C42 H79 O8 N1 P1	756.555	12.848	0.024664	0.94444	0.721915	0.241974	1.95072e+07	1.76203e+07	1.35618e+07	1.40758e+07	1.57566e+07	1.2632e+07	2.84311e+07	2.14646e+07	2.27351e+07	2.57965e+07	2.43587e+07	2.17291e+07	1.88304e+07	1.96507e+07	1.88385e+07
1333NEG		PE(20:0p/18:1)-H	PE(38:1p)-H	PE	(20:0p/18:1)	(20:0p)	(18:1)			C43 H83 O7 N1 P1	756.591	13.9989	0.0270768	1.49779	0.0144372	0.131187	808644	2.50802e+06	1.63661e+06	1.59645e+06	1.04769e+06	1.70824e+06	2.51024e+06	2.23607e+06	1.92567e+06	1.69466e+06	1.27468e+06	1.90407e+06	1.66045e+06	1.7428e+06	1.73871e+06
1334NEG		PE(38:2e)-H	PE(38:2e)-H	PE	(38:2e)	(38:2e)				C43 H83 O7 N1 P1	756.591	14.592	0.00821331	0.99597	0.96415	0.0686106	5.14861e+06	7.03063e+06	5.707e+06	5.97959e+06	8.28854e+06	5.73188e+06	7.21501e+06	6.70128e+06	6.45603e+06	7.87726e+06	5.75829e+06	6.96328e+06	6.44466e+06	6.53724e+06	6.44557e+06
1335NEG		PE(19:0/18:1)-H	PE(37:1)-H	PE	(19:0/18:1)	(19:0)	(18:1)			C42 H81 O8 N1 P1	758.571	13.957	0.0265329	1.89274	0.0331932	0.266079	2.15351e+06	8.09546e+06	2.60177e+06	2.06407e+06	2.55996e+06	2.41082e+06	4.23669e+06	6.36456e+06	3.17765e+06	2.73187e+06	2.46183e+06	4.96365e+06	3.85264e+06	4.03472e+06	4.03585e+06
1336NEG		PE(20:0e/18:1)-H	PE(38:1e)-H	PE	(20:0e/18:1)	(20:0e)	(18:1)			C43 H85 O7 N1 P1	758.607	15.749	0.016602	1.72408	0.0450958	0.183298	1.10088e+06	4.75473e+06	1.55871e+06	1.59054e+06	1.83765e+06	1.5495e+06	2.46881e+06	2.93537e+06	1.62161e+06	1.90528e+06	1.57269e+06	3.33344e+06	2.28641e+06	2.35345e+06	2.28772e+06
1337NEG		PE(16:1/22:6)-H	PE(38:7)-H	PE	(16:1/22:6)	(16:1)	(22:6)			C43 H71 O8 N1 P1	760.492	9.607	0.0146902	0.736685	0.0123243	0.69165	3.7504e+07	2.39069e+07	2.43985e+07	3.72868e+07	3.97437e+07	3.06211e+07	2.60085e+07	2.84795e+07	3.85723e+07	4.76102e+07	4.04084e+07	4.4219e+07	3.37632e+07	3.46393e+07	3.46349e+07
1338NEG		PE(16:1/22:6)-H	PE(38:7)-H	PE	(16:1/22:6)	(16:1)	(22:6)			C43 H71 O8 N1 P1	760.492	9.29567	0.00844045	0.909301	0.306085	0.863138	192163229	246693702	1.443e+08	184856327	2.26682e+08	1.91323e+08	1.88637e+08	1.41426e+08	1.97212e+08	206240117	2.15015e+08	1.98939e+08	1.91927e+08	1.94707e+08	1.9481e+08
1339NEG		PE(16:1/22:6)-H	PE(38:7)-H	PE	(16:1/22:6)	(16:1)	(22:6)			C43 H71 O8 N1 P1	760.492	8.98381	0.00501745	0.425666	0.000290298	0.535136	1.06417e+07	4.98554e+06	3.75216e+06	7.60692e+06	9.39033e+06	6.31184e+06	4.46363e+06	3.51167e+06	1.06781e+07	1.30288e+07	15185168	5.29521e+06	7.47557e+06	7.47602e+06	7.54095e+06
133POS		Cer(d38:0)+H	Cer(d38:0)+H	Cer	(d38:0)	(d38:0)				C38 H78 O3 N1	596.598	12.6416	0.0577452	0.87931	0.272449	0.0901477	7.0684e+06	6.80206e+06	6.16366e+06	7.03371e+06	8.62264e+06	6.09544e+06	8.40277e+06	4.02143e+06	5.69063e+06	7.50999e+06	8.66615e+06	7.7244e+06	8.59884e+06	7.81099e+06	7.77525e+06
1340NEG		PG(19:1/16:0)-H	PG(35:1)-H	PG	(19:1/16:0)	(19:1)	(16:0)			C41 H78 O10 N0 P1	761.534	11.052	0.0162368	0.950813	0.686592	0.11891	9.37965e+06	1.23042e+07	7.07855e+06	1.08598e+07	1.39229e+07	9.69821e+06	9.12732e+06	1.51235e+07	1.11735e+07	1.16336e+07	1.30268e+07	1.32215e+07	1.08323e+07	1.11423e+07	1.08371e+07
1341NEG		PG(35:1)-H	PG(35:1)-H	PG	(35:1)	(35:1)				C41 H78 O10 N0 P1	761.534	4.75289	0.0409182	4.2124	0.118142	0.386892	914336	3.52995e+06	2.63898e+06	841723	1.57157e+06	1.5196e+07	3.09966e+06	1.29219e+06	1.61293e+06	613918	1.20966e+06	2.73647e+06	2.77826e+06	2.8189e+06	2.99857e+06
1342NEG		SM(d34:2+hO)+HCOO	SM(d34:2+hO)+HCOO	SM	(d34:2+hO)	(d34:2+hO)				C40 H78 O9 N2 P1	761.545	8.4933	0.00874651	1.75192	0.0679764	0.0981446	474614	1.58285e+06	510938	493374	535158	535836	1.19682e+06	557812	409796	493766	533944	767540	731368	720324	731329
1343NEG		SM(d35:1)+HCOO	SM(d35:1)+HCOO	SM	(d35:1)	(d35:1)				C41 H82 O8 N2 P1	761.581	10.876	0.0137323	1.46429	0.0332869	0.282036	5.78772e+06	1.06332e+07	4.8693e+06	4.49551e+06	7.48031e+06	8.23573e+06	8.23813e+06	1.15099e+07	6.07391e+06	4.2337e+06	7.90964e+06	9.20008e+06	7.16951e+06	7.17024e+06	7.34177e+06
1344NEG		PE(16:0/22:6)-H	PE(38:6)-H	PE	(16:0/22:6)	(16:0)	(22:6)			C43 H73 O8 N1 P1	762.508	10.3866	0.0107541	1.03727	0.367625	1.78433	3752261882	3924693602	4505174000	4087060103	4067580997	4170083740	3708165871	3880916895	3502120775	4046758734	3722385431	3853034795	3795094165	3866871461	3866472118
1346NEG		PC(16:0p/16:0)+HCOO	PC(32:0p)+HCOO	PC	(16:0p/16:0)	(16:0p)	(16:0)			C41 H81 O9 N1 P1	762.565	12.068	0.0140722	1.49743	0.000158566	0.325877	6.54246e+06	9.44573e+06	8.03315e+06	6.06727e+06	5.15874e+06	8.03426e+06	9.83484e+06	9.50894e+06	5.46548e+06	4.94238e+06	7.00645e+06	7.82669e+06	7.49424e+06	7.70788e+06	7.59277e+06
1347NEG		SM(d34:1+pO)+HCOO	SM(d34:1+pO)+HCOO	SM	(d34:1+pO)	(d34:1+pO)				C40 H80 O9 N2 P1	763.561	9.554	0.00755355	3.97775	0.0219957	0.791814	3.98765e+06	4.99662e+07	2.23163e+07	8.30799e+06	7.2837e+06	7.74276e+06	3.61744e+07	1.56435e+07	6.58958e+06	5.74797e+06	4.24864e+06	1.20144e+07	1.51473e+07	1.49501e+07	1.49517e+07
1348NEG		PE(18:0/20:5)-H	PE(38:5)-H	PE	(18:0/20:5)	(18:0)	(20:5)			C43 H75 O8 N1 P1	764.524	10.6233	0.0077419	0.884719	0.17408	2.86472	1831951015	1973200027	1146986766	1452053383	1801648360	1543523921	1352004794	1293947832	1662128856	1643447436	1732587022	1647069458	1657719752	1659982206	1681108526
1349NEG		PE(18:0/20:5)-H	PE(38:5)-H	PE	(18:0/20:5)	(18:0)	(20:5)			C43 H75 O8 N1 P1	764.524	11.176	0.0129522	0.947951	0.522673	1.23087	7.25152e+08	7.20642e+08	4.56003e+08	6.44235e+08	8.30666e+08	684492560	7.18572e+08	8.18507e+08	6.89958e+08	7.00435e+08	778385504	7.43222e+08	7.21757e+08	7.3827e+08	7.38118e+08
134POS		LPI(18:0)+H	LPI(18:0)+H	LPI	(18:0)	(18:0)				C27 H54 O12 N0 P1	601.335	3.27446	0.0105348	1.25219	0.10852	0.0890813	2.18068e+07	2.88899e+07	3.44644e+07	2.95907e+07	3.71689e+07	3.23557e+07	5.10932e+07	3.08423e+07	2.61543e+07	2.79741e+07	3.43483e+07	4.4046e+07	2.23828e+07	2.2393e+07	2.1982e+07
1352NEG		PE(18:0/20:4)-H	PE(38:4)-H	PE	(18:0/20:4)	(18:0)	(20:4)			C43 H77 O8 N1 P1	766.539	11.2418	0.01539	0.994375	0.970947	0.323634	1.34131e+08	1.82348e+08	6.14035e+07	9.47914e+07	1.19394e+08	1.13441e+08	9.17136e+07	1.13157e+08	1.11684e+08	1.13416e+08	1.078e+08	1.15319e+08	1.10818e+08	1.10816e+08	1.13797e+08
1353NEG		PE(18:0/20:3)-H	PE(38:3)-H	PE	(18:0/20:3)	(18:0)	(20:3)			C43 H79 O8 N1 P1	768.555	12.502	0.00563228	0.909848	0.343183	1.32684	5.09077e+08	5.35109e+08	3.24826e+08	4.24049e+08	6.16284e+08	4.17504e+08	465865996	3.81914e+08	4.44108e+08	4.61155e+08	4.42591e+08	5.10852e+08	4.60717e+08	4.65741e+08	4.64465e+08
1354NEG		PE(38:3)-H	PE(38:3)-H	PE	(38:3)	(38:3)				C43 H79 O8 N1 P1	768.555	10.678	0.0488161	0.799101	0.13775	0.31898	1.77968e+07	1.33575e+07	8.459e+06	1.6466e+07	1.51257e+07	1.16029e+07	8.8926e+06	1.01713e+07	1.25036e+07	1.22351e+07	7.75323e+06	1.29474e+07	1.00659e+07	1.09295e+07	1.00438e+07
1355NEG		PG(16:0/20:4)-H	PG(36:4)-H	PG	(16:0/20:4)	(16:0)	(20:4)			C42 H74 O10 N0 P1	769.503	8.57277	0.00994158	1.13871	0.472639	0.332207	4.62907e+07	3.67552e+07	3.35022e+07	1.89952e+07	4.01194e+07	2.97413e+07	4.08138e+07	5.63624e+07	3.07762e+07	4.9733e+07	4.18e+07	6.21252e+07	3.82703e+07	3.8935e+07	3.8274e+07
1356NEG		MGDG(16:0/16:3)+HCOO	MGDG(32:3)+HCOO	MGDG	(16:0/16:3)	(16:0)	(16:3)			C42 H73 O12	769.511	17.102	0.00847987	1.27825	0.0192053	0.187434	6.95216e+06	7.59045e+06	8.22112e+06	4.08033e+06	5.36677e+06	6.04374e+06	6.43563e+06	6.02315e+06	4.98438e+06	5.12887e+06	5.36664e+06	6.43537e+06	5.86524e+06	5.86419e+06	5.779e+06
1357NEG		PE(18:2p/22:6)-H	PE(40:8p)-H	PE	(18:2p/22:6)	(18:2p)	(22:6)			C45 H73 O7 N1 P1	770.513	10.055	0.012833	1.53834	0.016405	0.390538	9.15696e+06	1.594e+07	1.54307e+07	1.3072e+07	8.22391e+06	8.20395e+06	1.33871e+07	2.06434e+07	8.57319e+06	8.98167e+06	9.73102e+06	1.52167e+07	1.13744e+07	1.16631e+07	1.1576e+07
1358NEG		PE(18:0/20:2)-H	PE(38:2)-H	PE	(18:0/20:2)	(18:0)	(20:2)			C43 H81 O8 N1 P1	770.571	13.239	0.011994	1.2682	0.0711483	0.460958	2.23405e+07	4.52962e+07	2.82991e+07	2.30899e+07	3.25499e+07	2.49465e+07	3.21371e+07	4.12133e+07	3.13386e+07	2.93676e+07	2.80701e+07	3.95887e+07	3.25664e+07	3.32505e+07	3.2572e+07
1359NEG		PE(38:2)-H	PE(38:2)-H	PE	(38:2)	(38:2)				C43 H81 O8 N1 P1	770.571	11.802	0.0098313	0.825694	0.0224567	0.705225	5.59872e+07	4.4908e+07	4.91864e+07	5.58343e+07	7.60027e+07	6.15114e+07	5.65023e+07	5.25203e+07	6.24787e+07	6.89638e+07	7.11792e+07	5.77603e+07	5.67093e+07	5.76951e+07	5.76766e+07
135POS		LPC(22:0)+Na	LPC(22:0)+Na	LPC	(22:0)	(22:0)				C30 H62 O7 N1 P1 Na1	602.416	7.03681	0.00805366	1.90219	0.0143812	0.0864016	3.08694e+06	4.5086e+06	8.10513e+06	1.09677e+06	5.44599e+06	5.35498e+06	6.65614e+06	5.43291e+06	3.47227e+06	1.75948e+06	5.67295e+06	9.0026e+06	3.61215e+06	3.61205e+06	3.56195e+06
1360NEG		PG(16:0/20:3)-H	PG(36:3)-H	PG	(16:0/20:3)	(16:0)	(20:3)			C42 H76 O10 N0 P1	771.518	9.67376	0.00643255	1.48614	0.0350256	0.642288	3.40974e+07	5.11876e+07	2.94227e+07	1.49176e+07	2.83724e+07	2.48341e+07	3.84188e+07	4.90943e+07	2.22041e+07	3.06206e+07	3.1789e+07	4.77982e+07	3.23708e+07	32735847	3.23769e+07
1363NEG		PE(18:0/20:1)-H	PE(38:1)-H	PE	(18:0/20:1)	(18:0)	(20:1)			C43 H83 O8 N1 P1	772.586	14.626	0.00451143	0.850841	0.122934	0.420408	2.49778e+07	2.89367e+07	1.88965e+07	2.34766e+07	2.53275e+07	1.62188e+07	2.13896e+07	1.94962e+07	2.40976e+07	3.07784e+07	2.10858e+07	2.24701e+07	2.34507e+07	2.36347e+07	2.34513e+07
1364NEG		PE(38:1)-H	PE(38:1)-H	PE	(38:1)	(38:1)				C43 H83 O8 N1 P1	772.586	12.823	0.00901639	1.14227	0.0876387	0.207006	1.25168e+07	1.84963e+07	1.35249e+07	1.3244e+07	1.74964e+07	1.50574e+07	1.79665e+07	1.54368e+07	1.35876e+07	1.46498e+07	1.4493e+07	1.77392e+07	15643360	1.55045e+07	1.57867e+07
1365NEG		PE(38:1)-H	PE(38:1)-H	PE	(38:1)	(38:1)				C43 H83 O8 N1 P1	772.586	11.924	0.0648644	1.75416	0.0220595	0.363697	4.21352e+06	1.07639e+07	5.71114e+06	3.26432e+06	9.52115e+06	1.26753e+07	8.9886e+06	9.06731e+06	3.82127e+06	3.33193e+06	6.85816e+06	7.19079e+06	7.65608e+06	8.62722e+06	8.53748e+06
1366NEG		PG(18:0/18:2)-H	PG(36:2)-H	PG	(18:0/18:2)	(18:0)	(18:2)			C42 H78 O10 N0 P1	773.534	10.694	0.00855529	1.30869	0.278193	0.875789	1.10683e+08	9.73991e+07	1.28744e+08	1.25245e+08	1.22172e+08	1.09901e+08	1.32412e+08	2.99551e+08	1.35493e+08	1.34486e+08	1.52637e+08	2.5371e+08	1.28402e+08	1.30318e+08	1.30329e+08
1369NEG		PE(18:1p/22:5)-H	PE(40:6p)-H	PE	(18:1p/22:5)	(18:1p)	(22:5)			C45 H77 O7 N1 P1	774.544	11.3913	0.00440844	1.5956	0.0832775	0.742057	3.7771e+07	9.14378e+07	4.32095e+07	2.71746e+07	2.89563e+07	2.43555e+07	4.50968e+07	4.37253e+07	2.6973e+07	2.75011e+07	3.30573e+07	4.16691e+07	3.56256e+07	3.56248e+07	3.53539e+07
136POS		LPC(24:1)+H	LPC(24:1)+H	LPC	(24:1)	(24:1)				C32 H65 O7 N1 P1	606.449	7.02547	0.0355483	2.20717	0.00165891	0.141437	4.91273e+06	1.21671e+07	1.64348e+07	3.13965e+06	9.14147e+06	9.58787e+06	1.22409e+07	9.79832e+06	5.40275e+06	4.00936e+06	8.4854e+06	1.72235e+07	6.24809e+06	6.63554e+06	6.23825e+06
1370NEG		PE(18:0p/22:6)-H	PE(40:6p)-H	PE	(18:0p/22:6)	(18:0p)	(22:6)			C45 H77 O7 N1 P1	774.544	12.208	0.00725981	1.14113	0.0321117	0.658392	1.48638e+08	1.61941e+08	1.95816e+08	1.86946e+08	1.73934e+08	1.95009e+08	1.73155e+08	2.03561e+08	1.56911e+08	1.66505e+08	1.43554e+08	1.84813e+08	1.80656e+08	1.8071e+08	1.82964e+08
1371NEG		PG(18:0/18:1)-H	PG(36:1)-H	PG	(18:0/18:1)	(18:0)	(18:1)			C42 H80 O10 N0 P1	775.549	11.651	0.0174887	1.70216	0.0331663	0.837688	2.45107e+07	5.27298e+07	4.17077e+07	3.03846e+07	3.5154e+07	3.11062e+07	5.41617e+07	9.48057e+07	3.49009e+07	3.0653e+07	3.49215e+07	4.97925e+07	4.18312e+07	4.18501e+07	4.31209e+07
1373NEG		PE(17:0/22:6)-H	PE(39:6)-H	PE	(17:0/22:6)	(17:0)	(22:6)			C44 H75 O8 N1 P1	776.524	10.977	0.0129875	1.40525	0.00818881	0.97623	8.80846e+07	1.24331e+08	9.94362e+07	7.33454e+07	8.73949e+07	9.96077e+07	9.16095e+07	1.55017e+08	8.11809e+07	7.64038e+07	7.56413e+07	1.07398e+08	9.88171e+07	9.88395e+07	1.01068e+08
1375NEG		PE(18:0p/22:5)-H	PE(40:5p)-H	PE	(18:0p/22:5)	(18:0p)	(22:5)			C45 H79 O7 N1 P1	776.56	13.15	0.0115943	1.45867	0.0220125	0.499868	1.03928e+07	2.50451e+07	1.77671e+07	1.51771e+07	2.25663e+07	2.00548e+07	3.22258e+07	2.84804e+07	1.56372e+07	1.67305e+07	1.84512e+07	2.07694e+07	2.04694e+07	2.08962e+07	2.04962e+07
1377NEG		SM(d36:0)+HCOO	SM(d36:0)+HCOO	SM	(d36:0)	(d36:0)				C42 H86 O8 N2 P1	777.613	12.007	0.0247134	0.615751	0.0908329	0.435356	8.28161e+06	8.95732e+06	5.77493e+06	1.8755e+07	2.60178e+07	1.6773e+07	7.94379e+06	1.01811e+07	1.31863e+07	1.77536e+07	8.79838e+06	7.50701e+06	1.41137e+07	1.35226e+07	1.35301e+07
1379NEG		PE(20:0p/20:4)-H	PE(40:4p)-H	PE	(20:0p/20:4)	(20:0p)	(20:4)			C45 H81 O7 N1 P1	778.576	14.071	0.0103143	1.41578	0.0361224	0.719418	3.05264e+07	4.25718e+07	7.30963e+07	4.05456e+07	4.9225e+07	4.20019e+07	8.16447e+07	6.51823e+07	4.15506e+07	4.79867e+07	4.25144e+07	5.27742e+07	5.07236e+07	5.16408e+07	5.07347e+07
137POS		DG(16:1/18:3)+NH4	DG(34:4)+NH4	DG	(16:1/18:3)	(16:1)	(18:3)			C37 H68 O5 N1	606.509	10.3	0.077044	3.54545	0.00220773	0.349565	7.30818e+06	1.76977e+07	5.72214e+07	6.6234e+06	1.83073e+07	69741898	6.22256e+07	3.3735e+07	1.48492e+07	9.28704e+06	2.79554e+07	5.83679e+07	2.01441e+07	2.05677e+07	2.31739e+07
1380NEG		PE(40:4p)-H	PE(40:4p)-H	PE	(40:4p)	(40:4p)				C45 H81 O7 N1 P1	778.576	13.627	0.0285437	1.1671	0.211832	0.498466	3.53388e+07	7.64656e+07	4.81734e+07	4.66302e+07	6.00086e+07	4.77118e+07	6.62999e+07	6.501e+07	4.6976e+07	5.98255e+07	5.28992e+07	4.84295e+07	5.70575e+07	5.99511e+07	5.71065e+07
1381NEG		PE(40:5e)-H	PE(40:5e)-H	PE	(40:5e)	(40:5e)				C45 H81 O7 N1 P1	778.576	13.35	0.0264437	1.84776	0.0254038	0.395088	5.41379e+06	1.74658e+07	7.78902e+06	5.51298e+06	6.33606e+06	6.99347e+06	1.53464e+07	1.00763e+07	5.13991e+06	7.57379e+06	5.10744e+06	7.15563e+06	8.99939e+06	9.41797e+06	8.99939e+06
1382NEG		MGDG(16:0/17:5)+HCOO	MGDG(33:5)+HCOO	MGDG	(16:0/17:5)	(16:0)	(17:5)			C43 H71 O12	779.495	14.87	0.0104401	2.7395	0.00247547	0.34116	2.42921e+06	5.48693e+06	8.11062e+06	1.6009e+06	1.82571e+06	3.4695e+06	4.38537e+06	4.37476e+06	1.30682e+06	1.66704e+06	1.70312e+06	3.02744e+06	3.1191e+06	3.12023e+06	3.17641e+06
1383NEG		PS(18:3/18:2)-H	PS(36:5)-H	PS	(18:3/18:2)	(18:3)	(18:2)			C42 H71 O10 N1 P1	780.482	9.7698	0.0187744	1.09135	0.420234	0.0802214	9.52494e+06	1.50859e+07	7.52157e+06	8.5962e+06	1.03239e+07	1.05692e+07	1.22903e+07	1.03435e+07	1.16689e+07	1.02545e+07	1.131e+07	1.15021e+07	1.0421e+07	1.04452e+07	1.07754e+07
1384NEG		PE(19:0/20:4)-H	PE(39:4)-H	PE	(19:0/20:4)	(19:0)	(20:4)			C44 H79 O8 N1 P1	780.555	12.387	0.0224688	0.95468	0.783335	0.299448	3.1246e+07	3.96655e+07	1.75964e+07	2.08092e+07	2.3294e+07	1.90406e+07	2.33428e+07	3.97441e+07	3.53658e+07	3.48611e+07	3.27741e+07	3.0878e+07	2.9405e+07	3.05683e+07	2.94125e+07
1385NEG		PE(39:4)-H	PE(39:4)-H	PE	(39:4)	(39:4)				C44 H79 O8 N1 P1	780.555	11.916	0.0566524	1.34988	0.110759	0.166577	3.61533e+06	3.8451e+06	6.02309e+06	2.08398e+06	4.14825e+06	3.05905e+06	5.84356e+06	3.2716e+06	2.1293e+06	4.39301e+06	3.38501e+06	4.62429e+06	3.59095e+06	3.9481e+06	3.57832e+06
1386NEG		PE(20:0e/20:4)-H	PE(40:4e)-H	PE	(20:0e/20:4)	(20:0e)	(20:4)			C45 H83 O7 N1 P1	780.591	14.322	0.0127165	1.53185	0.0220448	0.575987	1.18845e+07	2.77639e+07	2.63129e+07	1.61526e+07	27675555	2.51217e+07	4.46193e+07	2.68812e+07	1.89868e+07	2.13004e+07	1.88842e+07	2.52867e+07	2.41524e+07	2.46926e+07	2.41609e+07
1387NEG		PE(40:4e)-H	PE(40:4e)-H	PE	(40:4e)	(40:4e)				C45 H83 O7 N1 P1	780.591	13.846	0.0218941	1.51004	0.167754	0.383646	5.48981e+06	2.57155e+07	9.27431e+06	7.68582e+06	1.12671e+07	7.20215e+06	1.70119e+07	1.26454e+07	8.69963e+06	1.13498e+07	8.41617e+06	8.04436e+06	1.13669e+07	1.18064e+07	1.13727e+07
1388NEG		MGDG(16:0/17:4)+HCOO	MGDG(33:4)+HCOO	MGDG	(16:0/17:4)	(16:0)	(17:4)			C43 H73 O12	781.511	16.206	0.0320905	0.884202	0.374336	0.166559	1.1127e+07	6.13549e+06	8.00795e+06	7.9467e+06	1.17963e+07	1.07269e+07	5.46702e+06	1.16083e+07	8.92345e+06	8.49255e+06	8.68239e+06	8.42597e+06	7.46643e+06	7.90339e+06	7.89113e+06
1389NEG		PE(18:4/22:6)-H	PE(40:10)-H	PE	(18:4/22:6)	(18:4)	(22:6)			C45 H69 O8 N1 P1	782.477	7.73807	0.0216269	0.515972	0.00649725	0.0807848	266992	104628	75197	278840	312547	334778	95843.3	134212	279279	319094	380629	203378	193915	201434	194240
138POS		LPC(24:0)+H	LPC(24:0)+H	LPC	(24:0)	(24:0)				C32 H67 O7 N1 P1	608.465	8.37253	0.025655	1.7173	0.00836475	0.227933	2.54321e+07	4.38288e+07	6.38295e+07	2.59179e+07	4.84357e+07	4.61028e+07	5.26163e+07	5.42585e+07	2.61859e+07	2.88358e+07	4.52949e+07	8.30003e+07	2.80364e+07	2.80818e+07	2.68311e+07
1390NEG		PS(16:0/20:4)-H	PS(36:4)-H	PS	(16:0/20:4)	(16:0)	(20:4)			C42 H73 O10 N1 P1	782.498	9.39039	0.0531051	0.467733	0.000746303	0.868732	2.79175e+07	1.16873e+07	2.53755e+07	3.3315e+07	4.04726e+07	1.22988e+07	1.97025e+07	1.40807e+07	2.61195e+07	3.62647e+07	4.78684e+07	1.59947e+07	2.66633e+07	2.66452e+07	2.91834e+07
1391NEG		PS(16:0/20:4)-H	PS(36:4)-H	PS	(16:0/20:4)	(16:0)	(20:4)			C42 H73 O10 N1 P1	782.498	10.9346	0.0350834	0.972685	0.574132	0.31156	5.2548e+07	5.95686e+07	4.5288e+07	5.22359e+07	5.17201e+07	5.69078e+07	5.44688e+07	4.82466e+07	5.33766e+07	5.33096e+07	5.72985e+07	4.72547e+07	5.4119e+07	5.30705e+07	5.67897e+07
1392NEG		PE(19:0/20:3)-H	PE(39:3)-H	PE	(19:0/20:3)	(19:0)	(20:3)			C44 H81 O8 N1 P1	782.571	12.1597	0.0242907	1.00958	0.946867	0.09804	4.42851e+06	5.50317e+06	3.22455e+06	3.06322e+06	3.49887e+06	2.87152e+06	3.5513e+06	5.71653e+06	5.18213e+06	4.76252e+06	4.33801e+06	4.64823e+06	4.44087e+06	4.63175e+06	4.63443e+06
1394NEG		PE(18:3/22:6)-H	PE(40:9)-H	PE	(18:3/22:6)	(18:3)	(22:6)			C45 H71 O8 N1 P1	784.492	8.6887	0.0214109	0.608102	0.00033786	0.278914	4.16044e+06	2.45698e+06	1.91334e+06	3.8082e+06	4.02386e+06	3.20336e+06	1.88903e+06	2.56372e+06	4.21875e+06	4.0542e+06	5.06029e+06	3.3742e+06	3.37159e+06	3.49873e+06	3.50083e+06
1396NEG		PS(18:0/18:2)-H	PS(36:2)-H	PS	(18:0/18:2)	(18:0)	(18:2)			C42 H77 O10 N1 P1	786.529	10.7428	0.0677931	1.16606	0.522225	0.545514	4.76796e+07	3.45034e+07	2.86749e+07	4.16711e+07	5.8884e+07	6.47413e+07	1.0627e+08	4.0906e+07	4.14054e+07	5.0006e+07	6.06841e+07	7.51076e+07	4.37274e+07	3.9575e+07	3.852e+07
1397NEG		PG(37:2)-H	PG(37:2)-H	PG	(37:2)	(37:2)				C43 H80 O10 N0 P1	787.549	4.74158	0.0402877	9.36709	0.238266	1.03315	2.95456e+06	1.17326e+07	5.02359e+06	2.74957e+06	3.50288e+06	1.16549e+08	7.56635e+06	3.14541e+06	3.29938e+06	1.15293e+06	2.74209e+06	9.61687e+06	1.19147e+07	1.20684e+07	1.28376e+07
1398NEG		PE(18:1/22:6)-H	PE(40:7)-H	PE	(18:1/22:6)	(18:1)	(22:6)			C45 H75 O8 N1 P1	788.524	10.864	0.00803606	0.828089	0.247441	0.808096	9.82795e+07	1.27215e+08	3.79468e+07	1.33621e+08	1.58602e+08	1.38485e+08	8.32769e+07	1.28826e+08	1.44342e+08	1.25276e+08	1.17946e+08	1.28559e+08	1.14335e+08	1.14623e+08	1.1606e+08
1399NEG		PE(18:1/22:6)-H	PE(40:7)-H	PE	(18:1/22:6)	(18:1)	(22:6)			C45 H75 O8 N1 P1	788.524	10.4723	0.0161773	0.97361	0.662724	1.48876	1712137024	1775000613	1466498261	1357254058	1508457893	1475833940	1235992365	1375156455	1500393651	1532152982	1400996062	1445098391	1419636741	1460718938	1459601476
139POS		DG(16:0/18:3)+NH4	DG(34:3)+NH4	DG	(16:0/18:3)	(16:0)	(18:3)			C37 H70 O5 N1	608.525	11.331	0.019454	2.02643	0.00822011	0.333144	2.74619e+07	4.63661e+07	6.90056e+07	2.36667e+07	7.82021e+07	9.6351e+07	9.25649e+07	8.3938e+07	3.94636e+07	1.6797e+07	3.96097e+07	6.81277e+07	4.41889e+07	4.56968e+07	4.57269e+07
13POS		MG(20:4)+H	MG(20:4)+H	MG	(20:4)	(20:4)				C23 H39 O4	379.284	3.415	0.0612489	4.37631	0.229221	0.0926162	259899	923892	896218	477234	607911	8.56251e+06	993650	581606	472866	214258	902984	887276	451112	501645	503522
1400NEG		PE(40:7)-H	PE(40:7)-H	PE	(40:7)	(40:7)				C45 H75 O8 N1 P1	788.524	8.68505	0.011992	1.12215	0.375709	0.0584461	1.81876e+06	2.78682e+06	1.90025e+06	1.58657e+06	2.25644e+06	1.67707e+06	2.03402e+06	1.77736e+06	2.38027e+06	1.8038e+06	1.88656e+06	2.99e+06	1.96811e+06	2.01458e+06	2.00119e+06
1401NEG		PC(15:0/18:2)+HCOO	PC(33:2)+HCOO	PC	(15:0/18:2)	(15:0)	(18:2)			C42 H79 O10 N1 P1	788.545	9.954	0.0110441	1.00895	0.923322	0.291764	2.93013e+07	4.69674e+07	3.76577e+07	3.1733e+07	3.98589e+07	3.95337e+07	3.883e+07	4.29498e+07	4.33242e+07	4.82759e+07	4.63823e+07	3.50758e+07	3.87018e+07	3.94528e+07	3.94506e+07
1403NEG		PC(16:0e/18:2)+HCOO	PC(34:2e)+HCOO	PC	(16:0e/18:2)	(16:0e)	(18:2)			C43 H83 O9 N1 P1	788.581	11.336	0.0477957	2.03397	0.0139045	0.734963	1.09494e+07	4.65593e+07	2.67097e+07	1.19911e+07	1.51804e+07	1.44966e+07	3.4067e+07	2.53631e+07	1.18496e+07	1.4927e+07	16997507	1.93767e+07	2.02226e+07	2.02258e+07	2.19459e+07
1404NEG		PS(38:6p)-H	PS(38:6p)-H	PS	(38:6p)	(38:6p)				C44 H73 O9 N1 P1	790.503	11.338	0.0498091	1.26969	0.54637	0.305129	2.32188e+07	3.46848e+07	2.51357e+07	5.00228e+07	5.17516e+07	3.3718e+07	2.56816e+07	9.61654e+07	2.02439e+07	2.06103e+07	1.88436e+07	1.9115e+07	2.5108e+07	2.51581e+07	2.73651e+07
1405NEG		PE(18:1/22:5)-H	PE(40:6)-H	PE	(18:1/22:5)	(18:1)	(22:5)			C45 H77 O8 N1 P1	790.539	10.3796	0.0141124	1.01407	0.863395	0.0725921	3.12649e+07	2.68244e+07	4.14552e+07	2.99109e+07	3.27811e+07	2.92491e+07	2.55389e+07	3.13369e+07	2.89021e+07	3.31252e+07	2.98843e+07	3.40786e+07	2.86215e+07	2.93298e+07	2.93356e+07
1406NEG		PE(18:1/22:5)-H	PE(40:6)-H	PE	(18:1/22:5)	(18:1)	(22:5)			C45 H77 O8 N1 P1	790.539	10.0414	0.016736	0.978383	0.761673	0.314319	5.32653e+07	4.38136e+07	5.0608e+07	4.91908e+07	5.64856e+07	5.19246e+07	4.43827e+07	4.43579e+07	4.59654e+07	4.97655e+07	5.13171e+07	6.42884e+07	4.93931e+07	4.9398e+07	5.08414e+07
140POS		Cer(d18:1/21:0)+H	Cer(d39:1)+H	Cer	(d18:1/21:0)	(d18:1)	(21:0)			C39 H78 O3 N1	608.598	13.791	0.0227131	1.73661	0.00228536	0.207902	3.01802e+07	5.02454e+07	5.52105e+07	1.79684e+07	3.12887e+07	3.28946e+07	3.98655e+07	5.61601e+07	2.44154e+07	2.58643e+07	3.89915e+07	5.86047e+07	2.35183e+07	2.26641e+07	2.25758e+07
1410NEG		PG(16:1/22:6)-H	PG(38:7)-H	PG	(16:1/22:6)	(16:1)	(22:6)			C44 H72 O10 N0 P1	791.487	6.93029	0.0150085	6.14111	0.000219806	0.5028	935466	6.76878e+06	7.69203e+06	717046	1.25336e+06	2.53628e+06	8.11243e+06	6.73591e+06	1.17604e+06	1.13114e+06	1.63817e+06	1.02287e+07	3.63292e+06	3.72973e+06	3.7283e+06
1411NEG		PG(37:0)-H	PG(37:0)-H	PG	(37:0)	(37:0)				C43 H84 O10 N0 P1	791.581	6.16834	0.0346418	4.72313	0.0436349	0.200776	217687	628557	1.2007e+06	261844	239774	3.19053e+06	954129	634394	239071	297317	269126	593607	460171	493031	480049
1412NEG		PS(38:5p)-H	PS(38:5p)-H	PS	(38:5p)	(38:5p)				C44 H75 O9 N1 P1	792.518	9.18382	0.0473929	0.763765	0.0146938	0.167554	2.1752e+06	1.92103e+06	2.16095e+06	2.55242e+06	2.96128e+06	1.39571e+06	2.50573e+06	2.05914e+06	3.01921e+06	2.94843e+06	2.86679e+06	2.57737e+06	2.45707e+06	2.26601e+06	2.26567e+06
1415NEG		PC(18:0e/16:0)+HCOO	PC(34:0e)+HCOO	PC	(18:0e/16:0)	(18:0e)	(16:0)			C43 H87 O9 N1 P1	792.612	13.661	0.00473538	1.46006	0.0373057	0.371079	6.14186e+06	1.67323e+07	1.16704e+07	6.97646e+06	9.60961e+06	6.64189e+06	1.41225e+07	1.17278e+07	7.78582e+06	9.8736e+06	7.94221e+06	9.66906e+06	9.84522e+06	9.92723e+06	9.84732e+06
1417NEG		PG(18:2/20:4)-H	PG(38:6)-H	PG	(18:2/20:4)	(18:2)	(20:4)			C44 H74 O10 N0 P1	793.503	8.39135	0.0216559	2.03442	0.00360661	0.24007	1.69103e+06	3.57815e+06	2.72776e+06	983602	1.60784e+06	1.34242e+06	2.60398e+06	3.65654e+06	1.42539e+06	1.59757e+06	1.41437e+06	3.8309e+06	2.09907e+06	2.17958e+06	2.18007e+06
1418NEG		PG(16:0/22:6)-H	PG(38:6)-H	PG	(16:0/22:6)	(16:0)	(22:6)			C44 H74 O10 N0 P1	793.503	8.08034	0.0223297	3.59416	0.00013563	0.391023	1.157e+06	4.55521e+06	4.52193e+06	987711	1.77505e+06	2.27191e+06	6.03882e+06	5.93533e+06	1.30847e+06	1.26453e+06	1.45584e+06	5.2453e+06	2.83383e+06	2.95333e+06	2.8524e+06
1419NEG		PG(16:0/22:6)-H	PG(38:6)-H	PG	(16:0/22:6)	(16:0)	(22:6)			C44 H74 O10 N0 P1	793.503	8.94067	0.0343374	3.11821	0.152657	0.405742	2.95612e+06	3.10145e+06	2.69736e+07	2.27067e+06	2.9441e+06	4.09348e+06	3.26627e+06	1.40245e+07	2.35222e+06	4.0847e+06	2.88076e+06	3.07383e+06	5.8479e+06	5.85223e+06	6.20501e+06
1421NEG		PE(20:0/20:4)-H	PE(40:4)-H	PE	(20:0/20:4)	(20:0)	(20:4)			C45 H81 O8 N1 P1	794.571	13.309	0.0161308	0.741195	0.186987	0.617132	3.67772e+07	4.62412e+07	1.41141e+07	3.78969e+07	3.18452e+07	2.53479e+07	3.99971e+07	4.0413e+07	3.89342e+07	7.68085e+07	5.0685e+07	3.61937e+07	4.45499e+07	4.58017e+07	4.4541e+07
1422NEG		PE(18:0/22:4)-H	PE(40:4)-H	PE	(18:0/22:4)	(18:0)	(22:4)			C45 H81 O8 N1 P1	794.571	11.9195	0.016958	0.800941	0.0084589	0.494343	2.82625e+07	1.92018e+07	1.94502e+07	2.80396e+07	3.01182e+07	2.24861e+07	1.92287e+07	2.51681e+07	2.88689e+07	2.23256e+07	2.60009e+07	2.55118e+07	2.54096e+07	2.617e+07	2.54227e+07
1424NEG		PE(18:0/22:3)-H	PE(40:3)-H	PE	(18:0/22:3)	(18:0)	(22:3)			C45 H83 O8 N1 P1	796.586	13.98	0.0203152	1.23825	0.334061	0.199485	4.20104e+06	1.17203e+07	5.6277e+06	5.76168e+06	6.8964e+06	4.26986e+06	1.09406e+07	7.03533e+06	5.03606e+06	8.58077e+06	5.7806e+06	5.30076e+06	6.54422e+06	6.77788e+06	6.54549e+06
1425NEG		PE(40:3)-H	PE(40:3)-H	PE	(40:3)	(40:3)				C45 H83 O8 N1 P1	796.586	12.121	0.0334437	0.726282	0.0338137	0.293205	1.01022e+07	6.61188e+06	4.54513e+06	7.66333e+06	1.06349e+07	7.23549e+06	5.26674e+06	4.70147e+06	5.81948e+06	7.14764e+06	7.33025e+06	7.00763e+06	7.65712e+06	7.22186e+06	7.65687e+06
1427NEG		PG(18:0/20:4)-H	PG(38:4)-H	PG	(18:0/20:4)	(18:0)	(20:4)			C44 H78 O10 N0 P1	797.534	10.615	0.0241118	1.51662	0.0469621	0.786118	37692622	4.58452e+07	5.63697e+07	3.372e+07	4.14192e+07	2.90804e+07	6.41301e+07	8.87582e+07	3.25901e+07	3.55451e+07	3.80871e+07	4.80386e+07	4.28147e+07	4.46538e+07	4.46541e+07
1428NEG		PC(14:0/20:4)+HCOO	PC(34:4)+HCOO	PC	(14:0/20:4)	(14:0)	(20:4)			C43 H77 O10 N1 P1	798.529	8.86322	0.00519162	1.43669	0.0230561	0.481921	1.15535e+07	2.51219e+07	1.76078e+07	1.07568e+07	2.04186e+07	1.49495e+07	2.66623e+07	1.90429e+07	1.52582e+07	1.32708e+07	1.69592e+07	2.33559e+07	1.6981e+07	1.71573e+07	1.70856e+07
1429NEG		PC(14:0/20:4)+HCOO	PC(34:4)+HCOO	PC	(14:0/20:4)	(14:0)	(20:4)			C43 H77 O10 N1 P1	798.529	9.259	0.0198476	1.59205	0.00718365	0.77788	2.80237e+07	6.01953e+07	4.67055e+07	2.18935e+07	2.99042e+07	2.89293e+07	4.54228e+07	5.20355e+07	4.17355e+07	3.3606e+07	2.80942e+07	5.84653e+07	3.72896e+07	3.86119e+07	3.8591e+07
142POS		DG(16:0/18:1)+NH4	DG(34:1)+NH4	DG	(16:0/18:1)	(16:0)	(18:1)			C37 H74 O5 N1	612.556	12.873	0.0245695	2.05185	0.000904303	0.764144	2.20279e+08	2.17345e+08	4.01045e+08	1.32524e+08	2.63368e+08	4.54636e+08	4.20768e+08	3.75731e+08	1.97234e+08	9.99495e+07	1.92117e+08	3.98738e+08	1.72741e+08	1.65811e+08	1.65392e+08
1430NEG		PE(18:1/22:1)-H	PE(40:2)-H	PE	(18:1/22:1)	(18:1)	(22:1)			C45 H85 O8 N1 P1	798.602	14.676	0.0096805	1.02628	0.876386	0.138661	4.07316e+06	8.09915e+06	4.33085e+06	4.93829e+06	4.7394e+06	3.04201e+06	5.23261e+06	4.83036e+06	4.56099e+06	6.82551e+06	4.12498e+06	4.49642e+06	4.86604e+06	4.86585e+06	4.78481e+06
1431NEG		PG(18:0/20:3)-H	PG(38:3)-H	PG	(18:0/20:3)	(18:0)	(20:3)			C44 H80 O10 N0 P1	799.549	11.105	0.0330798	1.05868	0.564201	0.140816	8.43407e+06	6.4951e+06	8.30378e+06	6.69202e+06	6.24453e+06	4.74024e+06	8.59931e+06	7.89563e+06	7.05928e+06	6.27808e+06	6.88045e+06	7.99498e+06	6.8674e+06	7.26272e+06	6.85663e+06
1433NEG		PC(16:1/18:2)+HCOO	PC(34:3)+HCOO	PC	(16:1/18:2)	(16:1)	(18:2)			C43 H79 O10 N1 P1	800.545	9.56384	0.0081899	1.01101	0.892305	0.28282	3.50808e+08	4.63139e+08	3.55411e+08	3.67133e+08	4.53054e+08	4.09394e+08	4.78537e+08	3.60896e+08	4.18376e+08	4.44506e+08	4.98789e+08	4.93178e+08	411135835	4.16968e+08	417077477
1434NEG		PE(20:1p/22:6)-H	PE(42:7p)-H	PE	(20:1p/22:6)	(20:1p)	(22:6)			C47 H79 O7 N1 P1	800.56	12.205	0.0326052	1.40285	0.00160484	0.229078	2.96013e+06	5.22128e+06	5.85742e+06	4.19653e+06	3.33121e+06	5.74132e+06	6.57205e+06	5.53333e+06	4.78988e+06	4.91651e+06	4.79343e+06	6.12859e+06	5.17042e+06	4.88962e+06	4.88842e+06
1435NEG		PE(18:1/22:0)-H	PE(40:1)-H	PE	(18:1/22:0)	(18:1)	(22:0)			C45 H87 O8 N1 P1	800.617	14.5371	0.090092	0.804392	0.414187	0.0783485	363778	1.06096e+06	422833	575453	856807	274727	543627	395706	590546	1.06578e+06	530753	506135	597341	597283	508713
1436NEG		PG(38:2)-H	PG(38:2)-H	PG	(38:2)	(38:2)				C44 H82 O10 N0 P1	801.565	11.842	0.0323722	1.03312	0.886643	0.154162	3.47169e+06	6.27553e+06	4.08999e+06	3.38754e+06	4.52006e+06	1.93917e+06	3.5499e+06	5.63883e+06	2.68407e+06	3.00999e+06	6.76836e+06	3.13786e+06	3.60524e+06	3.82094e+06	3.62497e+06
1437NEG		PC(16:0/18:2)+HCOO	PC(34:2)+HCOO	PC	(16:0/18:2)	(16:0)	(18:2)			C43 H81 O10 N1 P1	802.56	10.582	0.00929391	0.950491	0.145467	4.44218	5704642802	5400771559	5515478444	5634324543	6502307627	5947724941	5807094635	5915621009	5774073223	6512259688	6180283547	5923638001	5844131538	5876125831	5950810207
1438NEG		PC(16:0/18:2)+HCOO	PC(34:2)+HCOO	PC	(16:0/18:2)	(16:0)	(18:2)			C43 H81 O10 N1 P1	802.56	12.4166	0.0350515	0.89968	0.42861	0.297987	1.74696e+07	9.05919e+06	9.92145e+06	1.32838e+07	1.24648e+07	1.65684e+07	1.72412e+07	1.60307e+07	1.80302e+07	1.76941e+07	18347603	1.87092e+07	1.49199e+07	1.58623e+07	1.58656e+07
1439NEG		PC(16:0/18:2)+HCOO	PC(34:2)+HCOO	PC	(16:0/18:2)	(16:0)	(18:2)			C43 H81 O10 N1 P1	802.56	13.363	0.0705878	0.682585	0.29842	0.230279	6.17252e+06	7.52551e+06	4.49323e+06	1.06689e+07	7.67019e+06	7.10986e+06	8.02497e+06	6.63358e+06	8.97495e+06	4.37939e+06	2.44115e+07	8.72254e+06	1.65147e+07	1.64357e+07	1.4541e+07
143POS		TG(16:1p/10:2/10:2)+H	TG(36:5p)+H	TG	(16:1p/10:2/10:2)	(16:1p)	(10:2)	(10:2)		C39 H65 O5	613.483	15.0164	0.0351057	1.87359	0.368503	0.0795975	5.22737e+06	1.20151e+06	3.81344e+06		1.75687e+06	1.08578e+06	8.90489e+06	358700	1.52776e+06	143468	2.93545e+06	1.06956e+07	1.39635e+07	1.40036e+07	1.31509e+07
1440NEG		PE(20:0p/22:6)-H	PE(42:6p)-H	PE	(20:0p/22:6)	(20:0p)	(22:6)			C47 H81 O7 N1 P1	802.576	13.609	0.0207123	1.08819	0.53477	0.369481	3.35641e+07	2.51158e+07	5.18386e+07	4.95342e+07	5.69766e+07	6.08159e+07	5.55329e+07	5.68426e+07	4.26543e+07	5.54437e+07	4.66978e+07	5.98487e+07	4.94758e+07	5.12733e+07	4.94779e+07
1442NEG		PS(38:7)-H	PS(38:7)-H	PS	(38:7)	(38:7)				C44 H71 O10 N1 P1	804.482	9.829	0.0161941	0.664321	0.00419731	0.498704	1.98659e+07	1.22953e+07	6.9556e+06	1.55294e+07	1.57575e+07	1.51542e+07	1.14096e+07	8.08137e+06	1.41761e+07	1.49147e+07	1.59679e+07	1.00192e+07	1.31412e+07	1.31732e+07	1.35287e+07
1443NEG		PS(20:5/18:2)-H	PS(38:7)-H	PS	(20:5/18:2)	(20:5)	(18:2)			C44 H71 O10 N1 P1	804.482	9.54774	0.0186752	0.906278	0.367379	0.25068	1.83785e+07	2.39501e+07	1.14281e+07	1.79155e+07	2.1773e+07	1.94726e+07	1.8255e+07	1.34622e+07	1.91425e+07	1.87487e+07	1.88887e+07	1.75153e+07	1.92313e+07	1.98358e+07	1.98942e+07
1444NEG		CerG2(d30:1)-H	CerG2(d30:1)-H	CerG2	(d30:1)	(d30:1)				C42 H78 O13 N1	804.548	4.727	0.042416	3.76646	0.148495	0.529702	2.25656e+06	3.84899e+06	3.09323e+06	2.69598e+06	2.28276e+06	2.82477e+07	5.62415e+06	2.24582e+06	2.7394e+06	1.14859e+06	2.59914e+06	8.6251e+06	7.49007e+06	7.47408e+06	6.9457e+06
1445NEG		PC(16:0/18:1)+HCOO	PC(34:1)+HCOO	PC	(16:0/18:1)	(16:0)	(18:1)			C43 H83 O10 N1 P1	804.576	11.523	0.00776237	1.07597	0.251432	2.08327	3132955139	4788174245	3520754643	3608964507	3719754841	3602647032	3581504252	3532780046	3553976243	3594215052	3460525785	3645354182	3588268402	3598485665	3641089633
1446NEG		PE(20:0p/22:5)-H	PE(42:5p)-H	PE	(20:0p/22:5)	(20:0p)	(22:5)			C47 H83 O7 N1 P1	804.591	14.635	0.0279059	1.36668	0.0224721	0.441631	1.19738e+07	2.00129e+07	2.36279e+07	1.30714e+07	1.73093e+07	1.66663e+07	2.23714e+07	2.81421e+07	1.36147e+07	1.93272e+07	2.10901e+07	2.09094e+07	1.96798e+07	1.90535e+07	1.86186e+07
1447NEG		PE(42:5p)-H	PE(42:5p)-H	PE	(42:5p)	(42:5p)				C47 H83 O7 N1 P1	804.591	13.857	0.0228374	1.79676	0.00607827	0.45228	4.61383e+06	1.11289e+07	1.62854e+07	7.49976e+06	8.67251e+06	7.5558e+06	1.72002e+07	1.23929e+07	6.8836e+06	6.99308e+06	6.98618e+06	1.02699e+07	1.13269e+07	1.17816e+07	1.13282e+07
1448NEG		PG(17:1/22:6)-H	PG(39:7)-H	PG	(17:1/22:6)	(17:1)	(22:6)			C45 H74 O10 N0 P1	805.503	7.66319	0.00451767	5.49296	0.000280525	0.184003	174638	1.4542e+06	801501	53379.4	173507	397430	1.06942e+06	1.07477e+06	253656	185572	222677	1.04404e+06	547938	552234	552263
1449NEG		PS(16:0/22:6)-H	PS(38:6)-H	PS	(16:0/22:6)	(16:0)	(22:6)			C44 H73 O10 N1 P1	806.498	10.799	0.0476121	1.08188	0.307462	0.259963	2.81066e+07	4.40438e+07	3.69198e+07	3.78724e+07	3.95678e+07	4.34214e+07	3.37924e+07	4.09181e+07	3.98536e+07	4.04476e+07	3.11581e+07	3.56786e+07	4.06291e+07	4.10616e+07	4.4288e+07
144POS		DG(16:0/20:4)+H	DG(36:4)+H	DG	(16:0/20:4)	(16:0)	(20:4)			C39 H69 O5	617.514	8.72305	0.0201137	1.1339	0.350489	0.0635321	1.08906e+07	1.1958e+07	1.46049e+07	1.07416e+07	1.29666e+07	1.24887e+07	1.71709e+07	1.14371e+07	1.03916e+07	1.25892e+07	1.85099e+07	1.8618e+07	9.81505e+06	1.01606e+07	9.81428e+06
1450NEG		PS(16:0/22:6)-H	PS(38:6)-H	PS	(16:0/22:6)	(16:0)	(22:6)			C44 H73 O10 N1 P1	806.498	8.84521	0.0697846	1.29586	0.129538	0.574985	4.39255e+07	5.33792e+07	6.55197e+07	7.20575e+07	4.89211e+07	4.19121e+07	86818954	8.52806e+07	5.36178e+07	6.54029e+07	4.82985e+07	9.76036e+07	7.5726e+07	8.5617e+07	8.57442e+07
1451NEG		PC(18:0/16:0)+HCOO	PC(34:0)+HCOO	PC	(18:0/16:0)	(18:0)	(16:0)			C43 H85 O10 N1 P1	806.592	12.725	0.012079	1.15301	0.0627119	0.839655	1.225e+08	1.86984e+08	1.64241e+08	1.26762e+08	1.63746e+08	1.31409e+08	1.74238e+08	1.75515e+08	1.43671e+08	1.5203e+08	1.42873e+08	1.49497e+08	1.48385e+08	1.48458e+08	1.51548e+08
1452NEG		PE(42:4p)-H	PE(42:4p)-H	PE	(42:4p)	(42:4p)				C47 H85 O7 N1 P1	806.607	15.124	0.0203742	1.59495	0.00677227	0.218116	1.27702e+06	3.15412e+06	3.22426e+06	1.90735e+06	2.93793e+06	1.99149e+06	4.06497e+06	3.50612e+06	1.97032e+06	2.01944e+06	2.04693e+06	3.45202e+06	2.74215e+06	2.75116e+06	2.84442e+06
1453NEG		PS(20:3/18:2)-H	PS(38:5)-H	PS	(20:3/18:2)	(20:3)	(18:2)			C44 H75 O10 N1 P1	808.513	11.035	0.0413205	1.13265	0.137345	0.299865	2.52751e+07	4.27615e+07	2.92515e+07	2.70044e+07	3.06795e+07	3.50824e+07	3.17876e+07	3.08414e+07	2.96783e+07	3.23572e+07	3.01258e+07	2.86262e+07	3.2409e+07	3.24848e+07	3.48249e+07
1454NEG		PS(18:0/20:5)-H	PS(38:5)-H	PS	(18:0/20:5)	(18:0)	(20:5)			C44 H75 O10 N1 P1	808.513	9.834	0.0680164	0.8267	0.21049	0.262184	1.05187e+07	7.85737e+06	5.93695e+06	1.1366e+07	1.08336e+07	1.10671e+07	1.18732e+07	4.92635e+06	1.06981e+07	7.55836e+06	8.534e+06	7.53493e+06	1.01496e+07	1.0217e+07	1.14306e+07
1455NEG		PE(42:4e)-H	PE(42:4e)-H	PE	(42:4e)	(42:4e)				C47 H87 O7 N1 P1	808.623	15.369	0.0666574	1.34303	0.151415	0.118157	737388	1.97591e+06	1.40065e+06	1.19963e+06	1.53054e+06	543469	2.13877e+06	1.76126e+06	1.10141e+06	1.35414e+06	1.41101e+06	2.02986e+06	1.46363e+06	1.46518e+06	1.64024e+06
1456NEG		PE(20:4/22:6)-H	PE(42:10)-H	PE	(20:4/22:6)	(20:4)	(22:6)			C47 H73 O8 N1 P1	810.508	8.93008	0.00949907	0.911787	0.132859	0.256101	1.49642e+07	1.19737e+07	1.26188e+07	1.43487e+07	1.32429e+07	1.50995e+07	1.1211e+07	1.44936e+07	1.45545e+07	1.64115e+07	1.33298e+07	1.37935e+07	1.51183e+07	1.51211e+07	1.53698e+07
1457NEG		PS(18:0/20:4)-H	PS(38:4)-H	PS	(18:0/20:4)	(18:0)	(20:4)			C44 H77 O10 N1 P1	810.529	10.6982	0.102916	0.466161	0.0545707	2.76385	2.16646e+08	1.37606e+08	227543337	2.07515e+08	2.71199e+08	1.59426e+08	2.30299e+08	3.76075e+08	5.36058e+08	7.80483e+08	7.14447e+08	1.39968e+08	3.68215e+08	3.08143e+08	3.11054e+08
1458NEG		PS(18:0/20:4)-H	PS(38:4)-H	PS	(18:0/20:4)	(18:0)	(20:4)			C44 H77 O10 N1 P1	810.529	12.1782	0.03333	0.896881	0.106645	0.878841	141360510	1.31265e+08	1.02809e+08	1.41382e+08	1.56584e+08	1.50068e+08	1.55574e+08	123911966	1.38955e+08	1.56662e+08	1.58884e+08	1.38028e+08	1.42718e+08	1.51851e+08	1.50572e+08
145POS		DG(18:1/18:3)+H	DG(36:4)+H	DG	(18:1/18:3)	(18:1)	(18:3)			C39 H69 O5	617.514	11.6958	0.0153704	1.29896	0.18671	0.0892544	4.02545e+07	4.63299e+07	8.21655e+07	3.4177e+07	8.06492e+07	4.59277e+07	7.41201e+07	9.45972e+07	5.43349e+07	3.80827e+07	6.21618e+07	5.9095e+07	3.60577e+07	3.61041e+07	3.51297e+07
1461NEG		PC(15:0/20:4)+HCOO	PC(35:4)+HCOO	PC	(15:0/20:4)	(15:0)	(20:4)			C44 H79 O10 N1 P1	812.545	9.749	0.00959843	1.04308	0.664655	0.193183	2.13278e+07	2.95908e+07	1.82506e+07	1.73251e+07	2.26248e+07	1.83957e+07	19561266	2.57806e+07	2.3681e+07	2.18537e+07	2.16744e+07	2.24436e+07	2.13505e+07	2.13617e+07	2.1713e+07
1463NEG		PG(18:4/22:6)-H	PG(40:10)-H	PG	(18:4/22:6)	(18:4)	(22:6)			C46 H70 O10 N0 P1	813.471	6.06143	0.0488907	8.62845	5.13711e-05	0.285027	195628	2.16697e+06	1.2907e+06		372043	1.39504e+06	2.63642e+06	2.27758e+06	241338	62297.5	286787	2.22435e+06	1.18152e+06	1.19851e+06	1.29264e+06
1464NEG		PE(20:2/22:6)-H	PE(42:8)-H	PE	(20:2/22:6)	(20:2)	(22:6)			C47 H77 O8 N1 P1	814.539	10.616	0.0203537	1.28304	0.206388	0.534424	3.88739e+07	7.94177e+07	3.09657e+07	2.85578e+07	37379636	3.06932e+07	4.86726e+07	5.78494e+07	3.63588e+07	4.6339e+07	3.84897e+07	4.23668e+07	4.50442e+07	4.50609e+07	4.66597e+07
1465NEG		PC(17:1/18:2)+HCOO	PC(35:3)+HCOO	PC	(17:1/18:2)	(17:1)	(18:2)			C44 H81 O10 N1 P1	814.56	10.118	0.0190878	0.776438	0.0481494	0.487979	2.21321e+07	2.28011e+07	1.52784e+07	1.93212e+07	2.28469e+07	2.31437e+07	2.18286e+07	1.84392e+07	2.88572e+07	3.38337e+07	3.04249e+07	2.07327e+07	2.3428e+07	2.42193e+07	2.42209e+07
1466NEG		PG(18:3/22:6)-H	PG(40:9)-H	PG	(18:3/22:6)	(18:3)	(22:6)			C46 H72 O10 N0 P1	815.487	6.938	0.0230861	4.55736	4.12961e-05	0.449027	1.07885e+06	5.28317e+06	5.66966e+06	733941	1.70291e+06	2.95864e+06	7.35923e+06	6.26274e+06	1.30067e+06	1.13479e+06	1.57265e+06	6.75527e+06	3.22031e+06	3.35309e+06	3.35212e+06
1467NEG		PA(45:7)-H	PA(45:7)-H	PA	(45:7)	(45:7)				C48 H80 O8 N0 P1	815.56	10.249	0.0630089	1.22144	0.428064	0.351881	1.58185e+07	2.78892e+07	3.97423e+07	1.56576e+07	1.57638e+07	7.72312e+06	1.46113e+07	1.79659e+07	2.00959e+07	1.70866e+07	1.96549e+07	1.91924e+07	1.66091e+07	1.49759e+07	1.68429e+07
1468NEG		PS(40:7p)-H	PS(40:7p)-H	PS	(40:7p)	(40:7p)				C46 H75 O9 N1 P1	816.518	11.364	0.0412647	1.19314	0.098758	0.192784	1.46663e+07	1.9936e+07	1.31669e+07	1.01767e+07	1.24659e+07	1.50339e+07	1.57222e+07	1.27847e+07	1.13654e+07	1.32557e+07	1.2622e+07	1.23073e+07	1.32532e+07	1.416e+07	1.43163e+07
1469NEG		PE(20:1/22:6)-H	PE(42:7)-H	PE	(20:1/22:6)	(20:1)	(22:6)			C47 H79 O8 N1 P1	816.555	11.601	0.0227459	0.761969	0.142479	0.53333	3.05242e+07	3.6705e+07	2.2151e+07	2.63274e+07	2.11864e+07	1.42875e+07	1.85768e+07	1.71969e+07	2.84157e+07	3.68927e+07	2.1544e+07	1.67242e+07	2.40273e+07	2.50144e+07	2.49838e+07
146POS		Cer(d18:1/22:2)+H	Cer(d40:3)+H	Cer	(d18:1/22:2)	(d18:1)	(22:2)			C40 H76 O3 N1	618.582	13.6062	0.0282755	0.875163	0.569276	0.129971	6.92954e+06	9.21508e+06	1.34295e+07	1.48485e+07	1.91569e+07	1.44941e+07	7.95332e+06	1.09174e+07	1.18815e+07	2.34511e+07	8.89229e+06	1.85193e+07	5.5921e+06	5.3225e+06	5.59183e+06
1471NEG		PC(18:0e/18:2)+HCOO	PC(36:2e)+HCOO	PC	(18:0e/18:2)	(18:0e)	(18:2)			C45 H87 O9 N1 P1	816.612	12.652	0.0159526	1.65616	0.010578	0.395719	5.16969e+06	1.60698e+07	1.07189e+07	5.91235e+06	8.11012e+06	7.00351e+06	1.15598e+07	8.62348e+06	5.92574e+06	6.7846e+06	6.48455e+06	9.59957e+06	8.4277e+06	8.66334e+06	8.4289e+06
1472NEG		PC(18:0p/18:1)+HCOO	PC(36:1p)+HCOO	PC	(18:0p/18:1)	(18:0p)	(18:1)			C45 H87 O9 N1 P1	816.612	12.3591	0.0088811	1.92606	0.0276809	0.402459	3.3961e+06	1.56986e+07	8.5037e+06	3.70724e+06	5.61691e+06	4.20438e+06	1.11995e+07	7.88733e+06	4.62322e+06	5.50426e+06	5.19323e+06	6.51484e+06	6.67698e+06	6.74251e+06	6.79648e+06
1474NEG		PG(18:2/22:6)-H	PG(40:8)-H	PG	(18:2/22:6)	(18:2)	(22:6)			C46 H74 O10 N0 P1	817.503	8.09686	0.0114981	1.62224	0.160186	0.133021	1.02723e+06	2.01526e+06	2.44437e+06	743507	973932	1.28344e+06	2.24581e+06	3.01777e+06	4.06646e+06	987369	855150	3.03161e+06	1.43585e+06	1.46467e+06	1.46499e+06
1475NEG		SM(d39:1)+HCOO	SM(d39:1)+HCOO	SM	(d39:1)	(d39:1)				C45 H90 O8 N2 P1	817.644	13.582	0.00983019	0.719226	0.0644586	0.607241	3.76589e+07	2.03617e+07	1.67293e+07	2.48435e+07	2.75017e+07	2.17175e+07	1.62522e+07	2.6901e+07	3.65125e+07	3.82219e+07	3.46791e+07	4.14645e+07	2.72177e+07	2.76863e+07	2.72227e+07
1476NEG		PS(40:6p)-H	PS(40:6p)-H	PS	(40:6p)	(40:6p)				C46 H77 O9 N1 P1	818.534	12.253	0.0455101	2.511	0.0309876	0.403393	3.19401e+06	1.72796e+07	8.27122e+06	4.12695e+06	2.71833e+06	5.87148e+06	7.08e+06	5.87778e+06	2.57054e+06	3.6669e+06	3.03875e+06	4.12113e+06	5.78897e+06	5.82737e+06	6.27715e+06
1477NEG		PE(20:0/22:6)-H	PE(42:6)-H	PE	(20:0/22:6)	(20:0)	(22:6)			C47 H81 O8 N1 P1	818.571	12.914	0.018377	0.308697	0.00668787	0.801483	2.10541e+07	7.10768e+06	5.98576e+06	2.31697e+07	9.64598e+06	5.76676e+06	6.68847e+06	7.36297e+06	2.03528e+07	4.15826e+07	1.52512e+07	7.54501e+06	1.40216e+07	1.44728e+07	1.40218e+07
1478NEG		PE(20:2/22:4)-H	PE(42:6)-H	PE	(20:2/22:4)	(20:2)	(22:4)			C47 H81 O8 N1 P1	818.571	11.2224	0.0179177	1.0281	0.814651	0.117045	2.78971e+07	2.18411e+07	2.34857e+07	2.66961e+07	3.23613e+07	2.91893e+07	2.57361e+07	4.33141e+07	2.63121e+07	2.93908e+07	2.86751e+07	3.25807e+07	2.64653e+07	2.64835e+07	2.73045e+07
1479NEG		PC(17:0/18:1)+HCOO	PC(35:1)+HCOO	PC	(17:0/18:1)	(17:0)	(18:1)			C44 H85 O10 N1 P1	818.592	12.169	0.00918641	1.32594	0.0743775	0.66565	4.64915e+07	1.00234e+08	5.21344e+07	4.50028e+07	4.84435e+07	5.03251e+07	55019613	8.16506e+07	5.41761e+07	5.62503e+07	5.48576e+07	6.53408e+07	5.98236e+07	6.00569e+07	6.08774e+07
147POS		Cer(d18:1/22:2)+H	Cer(d40:3)+H	Cer	(d18:1/22:2)	(d18:1)	(22:2)			C40 H76 O3 N1	618.582	12.1549	0.0223161	3.59098	0.000275779	0.371961	1.65174e+07	6.64792e+07	6.49907e+07	6.13792e+06	2.35429e+07	2.58086e+07	5.97413e+07	7.46584e+07	1.19448e+07	1.22625e+07	2.58028e+07	5.38035e+07	1.57637e+07	1.52071e+07	1.51382e+07
1481NEG		PG(20:3/20:4)-H	PG(40:7)-H	PG	(20:3/20:4)	(20:3)	(20:4)			C46 H76 O10 N0 P1	819.518	7.71008	0.013739	4.48295	0.000409022	0.529588	1.54668e+06	7.65119e+06	7.89601e+06	1.12735e+06	2.29054e+06	3.0725e+06	9.36887e+06	1.02442e+07	2.00634e+06	1.55889e+06	2.63928e+06	1.18376e+07	4.53102e+06	4.53541e+06	4.64188e+06
1482NEG		PG(18:1/22:6)-H	PG(40:7)-H	PG	(18:1/22:6)	(18:1)	(22:6)			C46 H76 O10 N0 P1	819.518	8.91847	0.0361355	2.36301	0.0142556	0.506235	4.75845e+06	1.32539e+07	1.09968e+07	5.99287e+06	6.72482e+06	6.36455e+06	1.68357e+07	2.01595e+07	2.92178e+06	5.30437e+06	5.37384e+06	5.82288e+06	1.15961e+07	1.08817e+07	1.15888e+07
1483NEG		PS(17:0/22:6)-H	PS(39:6)-H	PS	(17:0/22:6)	(17:0)	(22:6)			C45 H75 O10 N1 P1	820.513	11.342	0.042038	0.892276	0.222178	0.195161	9.8779e+06	9.6686e+06	6.27329e+06	8.01003e+06	1.03626e+07	1.09272e+07	8.60353e+06	1.03794e+07	1.02529e+07	1.07719e+07	1.07987e+07	7.75064e+06	9.38896e+06	9.39131e+06	1.00909e+07
1484NEG		PS(40:5p)-H	PS(40:5p)-H	PS	(40:5p)	(40:5p)				C46 H79 O9 N1 P1	820.55	11.946	0.0146419	1.04014	0.439475	0.0265645	7.205e+06	7.49653e+06	8.27453e+06	7.25688e+06	8.25536e+06	8.17602e+06	7.52259e+06	9.68712e+06	8.17171e+06	8.24947e+06	7.85664e+06	7.7245e+06	8.09037e+06	8.08796e+06	8.29605e+06
1485NEG		PE(22:1/20:4)-H	PE(42:5)-H	PE	(22:1/20:4)	(22:1)	(20:4)			C47 H83 O8 N1 P1	820.586	13.281	0.00700892	1.43988	0.0380051	0.332809	7.21778e+06	1.6202e+07	7.91493e+06	7.1439e+06	8.99774e+06	7.67185e+06	1.36971e+07	1.29223e+07	6.68706e+06	8.9927e+06	8.49413e+06	1.00343e+07	1.03199e+07	1.0445e+07	1.04474e+07
1486NEG		PC(20:0e/16:0)+HCOO	PC(36:0e)+HCOO	PC	(20:0e/16:0)	(20:0e)	(16:0)			C45 H91 O9 N1 P1	820.644	15.174	0.0109284	1.98547	0.00727535	0.217907	948127	3.57149e+06	2.16691e+06	1.10271e+06	1.6515e+06	1.34522e+06	2.42604e+06	3.29224e+06	1.26476e+06	1.48521e+06	965897	1.92674e+06	1.67032e+06	1.70256e+06	1.67118e+06
1487NEG		Cer(d50:2+pO)+HCOO	Cer(d50:2+pO)+HCOO	Cer	(d50:2+pO)	(d50:2+pO)				C51 H98 O6 N1	820.74	20.283	0.0387212	2.15775	0.0277444	0.118371	528131	635929	651141	174689	382169	1.3836e+06	650803	426430	278247	279017	331728	511452	459092	460506	491317
1489NEG		PC(14:0/22:6)+HCOO	PC(36:6)+HCOO	PC	(14:0/22:6)	(14:0)	(22:6)			C45 H77 O10 N1 P1	822.529	8.875	0.0133337	1.39994	0.0466117	0.515357	2.36178e+07	4.13022e+07	3.43241e+07	2.29596e+07	2.68814e+07	2.15725e+07	2.81633e+07	3.95298e+07	2.89476e+07	2.85311e+07	2.4514e+07	5.27312e+07	2.91645e+07	2.98467e+07	2.91713e+07
148POS		DG(18:1/18:2)+H	DG(36:3)+H	DG	(18:1/18:2)	(18:1)	(18:2)			C39 H71 O5	619.53	12.0068	0.0226549	2.24378	0.00256194	0.779357	1.4634e+08	1.80892e+08	366897622	9.36364e+07	240871066	450073729	334257140	276045163	1.44488e+08	9.42465e+07	189903935	4.32522e+08	1.41445e+08	1.41631e+08	1.36058e+08
1490NEG		PE(22:0/20:4)-H	PE(42:4)-H	PE	(22:0/20:4)	(22:0)	(20:4)			C47 H85 O8 N1 P1	822.602	14.785	0.00771666	1.72498	0.0271946	0.242917	1.81499e+06	6.10745e+06	3.66763e+06	1.86164e+06	2.88859e+06	2.7504e+06	5.28667e+06	3.72942e+06	1.9829e+06	2.88684e+06	2.31207e+06	2.17171e+06	3.23414e+06	3.27776e+06	3.23454e+06
1491NEG		PE(22:0/20:4)-H	PE(42:4)-H	PE	(22:0/20:4)	(22:0)	(20:4)			C47 H85 O8 N1 P1	822.602	13.3552	0.0255449	1.51114	0.243645	0.0738938	491214	1.63123e+06	158860	602582	670864	448380	1.14103e+06	931572	218400	991898	458137	876806	875428	914284	874566
1492NEG		PG(18:0/22:5)-H	PG(40:5)-H	PG	(18:0/22:5)	(18:0)	(22:5)			C46 H80 O10 N0 P1	823.549	9.77016	0.0129504	2.70466	0.000813976	0.965012	1.26682e+07	4.22378e+07	4.0359e+07	8.26494e+06	1.37538e+07	1.27176e+07	3.6922e+07	3.99757e+07	11887934	1.53007e+07	1.4703e+07	3.4907e+07	2.44109e+07	24960796	2.49725e+07
1493NEG		PC(16:1/20:4)+HCOO	PC(36:5)+HCOO	PC	(16:1/20:4)	(16:1)	(20:4)			C45 H79 O10 N1 P1	824.545	8.97744	0.00651091	0.60199	0.0294888	0.880291	3.43057e+07	2.56512e+07	3.38481e+07	3.98223e+07	5.86334e+07	4.74679e+07	3.00483e+07	3.04325e+07	5.56902e+07	6.86062e+07	9.17352e+07	4.25219e+07	4.3741e+07	4.4238e+07	4.42379e+07
1495NEG		PC(16:1/20:4)+HCOO	PC(36:5)+HCOO	PC	(16:1/20:4)	(16:1)	(20:4)			C45 H79 O10 N1 P1	824.545	9.25094	0.00696021	0.952914	0.60348	0.734594	1.65459e+08	2.19193e+08	1.35749e+08	1.39246e+08	175754724	1.30498e+08	1.65097e+08	1.42844e+08	1.81434e+08	1.73907e+08	1.62294e+08	1.57717e+08	1.51824e+08	1.5367e+08	153667062
1496NEG		PS(19:0/20:4)-H	PS(39:4)-H	PS	(19:0/20:4)	(19:0)	(20:4)			C45 H79 O10 N1 P1	824.545	10.5315	0.043685	0.577651	0.06019	0.323549	3.95903e+06	542579	7.7874e+06	7.69326e+06	8.16973e+06	4.57449e+06	6.95915e+06	6.71089e+06	1.34244e+07	1.15227e+07	7.70318e+06	3.73618e+06	6.20402e+06	6.69305e+06	6.70354e+06
1497NEG		PC(16:0/20:4)+HCOO	PC(36:4)+HCOO	PC	(16:0/20:4)	(16:0)	(20:4)			C45 H81 O10 N1 P1	826.56	10.379	0.00660822	0.88074	0.0631821	4.12053	3415858815	2636458343	2126827585	2561944264	3171238530	2600549638	2500827991	2626907617	2595519566	2782241529	2711541581	2690935989	2641069743	2641356763	2671558759
1499NEG		PS(18:3/22:6)-H	PS(40:9)-H	PS	(18:3/22:6)	(18:3)	(22:6)			C46 H71 O10 N1 P1	828.482	9.23102	0.0275446	1.01796	0.848246	0.188131	2.36431e+07	2.57507e+07	1.90629e+07	1.8756e+07	2.51111e+07	2.98048e+07	2.16237e+07	1.72869e+07	2.22929e+07	2.24943e+07	2.29032e+07	2.41001e+07	2.47694e+07	2.35831e+07	2.47193e+07
149POS		Cer(d18:2/22:0)+H	Cer(d40:2)+H	Cer	(d18:2/22:0)	(d18:2)	(22:0)			C40 H78 O3 N1	620.598	13.1184	0.0191035	2.21981	0.00190296	0.489262	7.03128e+07	1.8783e+08	1.94601e+08	3.54912e+07	8.67975e+07	8.36492e+07	1.53714e+08	1.61641e+08	4.82283e+07	5.80105e+07	1.15108e+08	1.37449e+08	5.00304e+07	4.84888e+07	4.83423e+07
14POS		WE(25:3)+NH4	WE(25:3)+NH4	WE	(25:3)	(25:3)				H48 C25 O2 N1	394.368	3.4458	0.0481658	1.48057	0.296177	0.0214892	731780	1.8124e+06	1.80333e+06	513200	2.65355e+06	1.42587e+06	1.00682e+06	1.09467e+06	668556	1.56998e+06	1.30047e+06	3.8687e+06	809369	809578	743770
1501NEG		PC(16:0/20:3)+HCOO	PC(36:3)+HCOO	PC	(16:0/20:3)	(16:0)	(20:3)			C45 H83 O10 N1 P1	828.576	11.156	0.0292636	1.07838	0.663936	0.444915	1.87201e+08	2.32495e+08	1.2562e+08	5.0176e+07	1.84506e+08	1.52901e+08	1.78811e+08	1.3715e+08	1.40368e+08	1.67562e+08	1.80269e+08	1.54436e+08	1.42071e+08	1.4215e+08	1.49437e+08
1502NEG		PE(18:1/24:0)-H	PE(42:1)-H	PE	(18:1/24:0)	(18:1)	(24:0)			C47 H91 O8 N1 P1	828.649	17.744	0.0140109	3.80578	0.0131105	0.264873	440785	5.12208e+06	2.56201e+06	997856	729092	1.45308e+06	3.55911e+06	2.14626e+06	534232	780168	628462	801467	1.64676e+06	1.68707e+06	1.6468e+06
1503NEG		SM(d22:1/18:1)+HCOO	SM(d40:2)+HCOO	SM	(d22:1/18:1)	(d22:1)	(18:1)			C46 H90 O8 N2 P1	829.644	12.792	0.012474	0.673192	0.00484806	0.77972	4.66418e+07	3.33287e+07	2.06521e+07	3.16338e+07	3.52465e+07	2.41022e+07	2.30579e+07	2.56642e+07	3.69956e+07	4.83488e+07	4.22875e+07	3.55378e+07	3.16681e+07	3.19947e+07	3.24633e+07
1504NEG		PS(18:2/22:6)-H	PS(40:8)-H	PS	(18:2/22:6)	(18:2)	(22:6)			C46 H73 O10 N1 P1	830.498	10.175	0.122809	1.06532	0.581599	0.27358	3.71763e+07	3.94951e+07	2.8706e+07	3.44679e+07	3.89983e+07	5.57185e+07	3.55583e+07	4.67657e+07	3.41717e+07	3.60945e+07	4.35149e+07	3.28398e+07	4.67372e+07	3.70067e+07	4.54668e+07
1505NEG		PS(39:1)-H	PS(39:1)-H	PS	(39:1)	(39:1)				C45 H85 O10 N1 P1	830.592	11.1277	0.0213526	0.967937	0.885044	0.141519	2.96999e+07	3.5192e+07	1.8569e+07	6.83728e+06	2.6092e+07	2.36421e+07	2.71507e+07	8.75341e+06	2.22189e+07	2.54998e+07	2.69584e+07	1.95965e+07	2.36515e+07	2.4526e+07	2.4569e+07
1507NEG		PI(16:0/18:3)-H	PI(34:3)-H	PI	(16:0/18:3)	(16:0)	(18:3)			C43 H76 O13 N0 P1	831.503	8.49242	0.0195098	1.51013	0.0587364	0.195476	1.91137e+06	3.71742e+06	2.51098e+06	2.12492e+06	2.23509e+06	1.75572e+06	5.61314e+06	3.83966e+06	2.53281e+06	2.66067e+06	2.91228e+06	4.27444e+06	3.22337e+06	3.3341e+06	3.3355e+06
1508NEG		PI(16:1/18:2)-H	PI(34:3)-H	PI	(16:1/18:2)	(16:1)	(18:2)			C43 H76 O13 N0 P1	831.503	8.07823	0.0288862	0.817934	0.2748	0.126383	2.29238e+06	2.66547e+06	2.23915e+06	3.3252e+06	2.4539e+06	2.24064e+06	4.39737e+06	2.2941e+06	3.38466e+06	4.58243e+06	4.76715e+06	3.18097e+06	3.34972e+06	3.35058e+06	3.52061e+06
150POS		Cer(d18:2/22:0)+H	Cer(d40:2)+H	Cer	(d18:2/22:0)	(d18:2)	(22:0)			C40 H78 O3 N1	620.598	13.4125	0.0471335	1.69498	0.00238877	0.425873	1.10719e+08	2.09151e+08	1.95365e+08	7.95931e+07	1.52945e+08	134106512	2.07401e+08	1.84345e+08	8.37189e+07	7.7743e+07	1.60759e+08	1.97599e+08	8.7417e+07	9.37517e+07	8.58208e+07
1510NEG		PS(20:3/20:4)-H	PS(40:7)-H	PS	(20:3/20:4)	(20:3)	(20:4)			C46 H75 O10 N1 P1	832.513	10.6412	0.0386715	1.09109	0.290439	0.288982	2.82585e+07	4.81802e+07	3.98821e+07	3.59481e+07	3.97875e+07	4.43079e+07	3.86589e+07	3.09648e+07	3.87168e+07	3.78474e+07	3.87688e+07	3.73116e+07	3.90115e+07	3.96414e+07	4.19636e+07
1511NEG		PC(18:0/18:1)+HCOO	PC(36:1)+HCOO	PC	(18:0/18:1)	(18:0)	(18:1)			C45 H87 O10 N1 P1	832.607	12.837	0.00784603	1.10749	0.104189	1.36444	8.73048e+08	1247284278	9.79357e+08	9.43166e+08	1138789627	9.96578e+08	1166984833	9.85192e+08	9.23958e+08	9.77038e+08	9.69186e+08	1075940987	9.85439e+08	9.99031e+08	9.98874e+08
1512NEG		PI(16:0/18:2)-H	PI(34:2)-H	PI	(16:0/18:2)	(16:0)	(18:2)			C43 H78 O13 N0 P1	833.519	9.324	0.0098241	0.78322	0.151662	1.26761	171087361	1.7031e+08	1.43263e+08	2.26792e+08	2.18067e+08	1.30556e+08	291441523	1.73597e+08	2.33083e+08	3.10137e+08	3.1395e+08	2.44606e+08	2.37441e+08	2.41524e+08	2.3748e+08
1513NEG		SM(d40:0)+HCOO	SM(d40:0)+HCOO	SM	(d40:0)	(d40:0)				C46 H94 O8 N2 P1	833.675	14.884	0.00736126	0.395981	0.00240341	0.994025	2.63222e+07	1.31811e+07	1.19413e+07	4.0192e+07	5.66032e+07	2.65309e+07	1.31041e+07	1.45519e+07	3.61922e+07	5.11482e+07	2.33456e+07	1.32725e+07	2.61631e+07	2.65511e+07	2.63643e+07
1514NEG		PS(18:0/22:6)-H	PS(40:6)-H	PS	(18:0/22:6)	(18:0)	(22:6)			C46 H77 O10 N1 P1	834.529	10.731	0.0240364	1.03057	0.913824	0.358548	1.44661e+08	2.10937e+08	2.32754e+08	5.49519e+08	2.3334e+08	177783496	3.99698e+08	2.21167e+08	1.58245e+08	2.22827e+08	2.15677e+08	3.28532e+08	242665686	2.52878e+08	2.42604e+08
1515NEG		PS(18:0/22:6)-H	PS(40:6)-H	PS	(18:0/22:6)	(18:0)	(22:6)			C46 H77 O10 N1 P1	834.529	11.946	0.0397068	0.923321	0.294427	0.812502	200398348	1.69365e+08	1.71283e+08	1.77762e+08	248322141	2.20915e+08	186073290	165832452	1.77858e+08	1.83631e+08	2.05247e+08	1.88255e+08	1.76877e+08	185821488	1.91417e+08
1517NEG		PS(18:0/22:6)-H	PS(40:6)-H	PS	(18:0/22:6)	(18:0)	(22:6)			C46 H77 O10 N1 P1	834.529	11.2624	0.0186233	1.02679	0.861881	0.374937	6.52489e+07	6.62248e+07	2.57561e+07	5.4714e+07	5.44907e+07	4.81375e+07	8.37838e+07	5.529e+07	5.25827e+07	6.14713e+07	4.99284e+07	6.83112e+07	5.89366e+07	5.89373e+07	6.08588e+07
1519NEG		PI(18:0/16:1)-H	PI(34:1)-H	PI	(18:0/16:1)	(18:0)	(16:1)			C43 H80 O13 N0 P1	835.534	10.779	0.0824966	0.705094	0.205788	0.729474	8.49443e+07	3.47704e+07	2.4779e+07	4.74968e+07	5.26946e+07	2.71536e+07	4.51248e+07	5.13694e+07	3.49291e+07	1.00187e+08	3.5191e+07	6.74234e+07	3.90493e+07	3.95398e+07	4.5174e+07
151POS		LPI(20:4)+H	LPI(20:4)+H	LPI	(20:4)	(20:4)				C29 H50 O12 N0 P1	621.303	1.98131	0.00188891	1.34099	0.0690942	0.0585343	5.58733e+06	8.54884e+06	1.01129e+07	7.498e+06	1.1945e+07	9.67027e+06	1.11321e+07	1.07182e+07	6.28101e+06	6.76344e+06	1.03982e+07	1.48194e+07	5.85157e+06	5.85157e+06	5.83245e+06
1520NEG		PS(40:5)-H	PS(40:5)-H	PS	(40:5)	(40:5)				C46 H79 O10 N1 P1	836.545	12.504	0.0248973	1.04626	0.575393	0.128304	4.44703e+07	6.46236e+07	4.20989e+07	4.88832e+07	5.75087e+07	5.56238e+07	5.17291e+07	4.24442e+07	4.88006e+07	4.97987e+07	4.58442e+07	5.24465e+07	5.06208e+07	5.29227e+07	5.28096e+07
1521NEG		PC(15:0/22:6)+HCOO	PC(37:6)+HCOO	PC	(15:0/22:6)	(15:0)	(22:6)			C46 H79 O10 N1 P1	836.545	9.379	0.00658284	1.03018	0.717723	0.0656201	2.02605e+07	2.41396e+07	2.09255e+07	1.9088e+07	2.06841e+07	1.8979e+07	1.44439e+07	2.14669e+07	2.07397e+07	2.12974e+07	1.98321e+07	2.56257e+07	1.89446e+07	1.8946e+07	1.91621e+07
1522NEG		PC(17:1/20:4)+HCOO	PC(37:5)+HCOO	PC	(17:1/20:4)	(17:1)	(20:4)			C46 H81 O10 N1 P1	838.56	9.865	0.00897266	0.923257	0.569361	0.228917	1.25879e+07	1.75902e+07	8.08487e+06	9.3e+06	1.15303e+07	8.31942e+06	1.03306e+07	1.24343e+07	1.32404e+07	1.45575e+07	1.38151e+07	1.25138e+07	1.16152e+07	1.17969e+07	1.17984e+07
1523NEG		PS(18:0/22:4)-H	PS(40:4)-H	PS	(18:0/22:4)	(18:0)	(22:4)			C46 H81 O10 N1 P1	838.56	11.4974	0.0809767	1.75369	0.00253749	0.685359	1.31717e+07	3.00772e+07	3.14195e+07	2.93611e+07	1.34548e+07	3.20558e+07	3.20379e+07	4.13154e+07	1.40706e+07	2.92217e+07	1.59605e+07	3.51905e+07	3.55825e+07	3.0782e+07	3.55059e+07
1525NEG		PC(18:0p/20:4)+HCOO	PC(38:4p)+HCOO	PC	(18:0p/20:4)	(18:0p)	(20:4)			C47 H85 O9 N1 P1	838.597	12.167	0.109892	1.58977	0.21658	0.187698	2.25133e+06	2.26817e+06	3.42455e+06	2.14139e+06	2.75302e+06	3.0059e+06	9.82827e+06	3.15794e+06	2.43198e+06	3.25044e+06	2.76705e+06	3.10798e+06	4.5547e+06	3.79688e+06	3.77433e+06
1526NEG		PG(20:5/22:6)-H	PG(42:11)-H	PG	(20:5/22:6)	(20:5)	(22:6)			C48 H72 O10 N0 P1	839.487	6.48354	0.017114	3.51069	9.62808e-06	0.449704	1.57877e+06	5.40524e+06	7.40886e+06	1.09372e+06	2.24558e+06	4.38184e+06	6.20073e+06	6.54487e+06	1.74433e+06	1.71722e+06	2.36589e+06	7.78264e+06	3.71031e+06	3.82366e+06	3.82133e+06
1527NEG		PC(17:0/20:4)+HCOO	PC(37:4)+HCOO	PC	(17:0/20:4)	(17:0)	(20:4)			C46 H83 O10 N1 P1	840.576	10.808	0.00762402	0.969201	0.714052	0.311018	7.61943e+07	8.19658e+07	6.02432e+07	5.38104e+07	8.02332e+07	6.86019e+07	6.47326e+07	8.38428e+07	7.19258e+07	7.64237e+07	8.8348e+07	7.37838e+07	7.4771e+07	7.47684e+07	7.57614e+07
1528NEG		PS(40:3)-H	PS(40:3)-H	PS	(40:3)	(40:3)				C46 H83 O10 N1 P1	840.576	14.629	0.0168962	0.903246	0.335443	0.151017	5.15982e+06	6.00267e+06	3.63209e+06	4.24159e+06	4.98471e+06	3.38163e+06	4.8575e+06	4.10131e+06	4.55852e+06	5.97699e+06	4.39051e+06	4.50086e+06	4.55876e+06	4.69432e+06	4.69533e+06
1529NEG		PC(18:0e/20:4)+HCOO	PC(38:4e)+HCOO	PC	(18:0e/20:4)	(18:0e)	(20:4)			C47 H87 O9 N1 P1	840.612	12.404	0.0142759	1.3117	0.00833346	0.443508	1.42971e+07	2.44602e+07	2.39499e+07	1.4042e+07	2.11333e+07	1.88073e+07	2.65062e+07	2.24701e+07	1.72475e+07	1.96198e+07	1.75027e+07	2.00163e+07	1.97636e+07	1.97729e+07	2.02611e+07
152POS		DG(18:1/18:1)+H	DG(36:2)+H	DG	(18:1/18:1)	(18:1)	(18:1)			C39 H73 O5	621.545	12.9095	0.0219488	3.00069	0.111705	0.150637	3.55428e+06	2.78705e+07	1.49146e+07	9.06332e+06	8.79843e+06	9.96061e+06	1.03333e+07	1.10134e+07	3.81942e+06	3.12639e+06	1.71767e+07	6.25549e+07	3.28479e+06	3.21883e+06	3.14373e+06
1531NEG		PC(17:0/20:3)+HCOO	PC(37:3)+HCOO	PC	(17:0/20:3)	(17:0)	(20:3)			C46 H85 O10 N1 P1	842.592	11.483	0.00438354	0.911848	0.523597	0.154939	1.30534e+07	1.2271e+07	5.19382e+06	9.34367e+06	9.79078e+06	9.72384e+06	6.94416e+06	1.02181e+07	8.18907e+06	9.90591e+06	7.58884e+06	8.41925e+06	9.67533e+06	9.60196e+06	9.67513e+06
1532NEG		PC(17:0/20:3)+HCOO	PC(37:3)+HCOO	PC	(17:0/20:3)	(17:0)	(20:3)			C46 H85 O10 N1 P1	842.592	11.213	0.0101151	1.10275	0.441058	0.132511	7.9575e+06	1.28012e+07	6.64723e+06	7.13921e+06	9.7127e+06	8.59415e+06	1.12211e+07	1.31174e+07	1.09867e+07	9.85141e+06	1.10429e+07	1.01345e+07	1.07401e+07	1.05357e+07	1.06973e+07
1533NEG		PC(18:0e/20:3)+HCOO	PC(38:3e)+HCOO	PC	(18:0e/20:3)	(18:0e)	(20:3)			C47 H89 O9 N1 P1	842.628	13.467	0.0244609	1.45452	0.0442726	0.319086	3.68624e+06	8.78643e+06	9.28807e+06	4.01123e+06	8.03778e+06	4.65636e+06	1.04758e+07	9.15244e+06	5.032e+06	6.14621e+06	8.50515e+06	9.15783e+06	6.9674e+06	7.26276e+06	6.95975e+06
1534NEG		PI(15:0/20:4)-H	PI(35:4)-H	PI	(15:0/20:4)	(15:0)	(20:4)			C44 H76 O13 N0 P1	843.503	8.34455	0.00621309	1.14125	0.298866	0.034106	591387	771640	508863	587167	500886	536133	763045	883998	468164	624584	777651	587572	689212	696620	689142
1535NEG		PG(20:3/22:6)-H	PG(42:9)-H	PG	(20:3/22:6)	(20:3)	(22:6)			C48 H76 O10 N0 P1	843.518	7.56069	0.0692198	4.17983	4.21979e-06	0.664762	3.30103e+06	1.50175e+07	1.32722e+07	756379	4.18143e+06	8.38911e+06	1.21399e+07	1.4236e+07	3.48931e+06	3.25603e+06	3.44871e+06	1.39916e+07	1.01148e+07	1.14304e+07	1.02133e+07
1536NEG		PG(22:5/20:4)-H	PG(42:9)-H	PG	(22:5/20:4)	(22:5)	(20:4)			C48 H76 O10 N0 P1	843.518	7.924	0.0139602	4.94265	0.000670453	0.6456	2.06563e+06	1.5181e+07	1.3008e+07	1.51484e+06	3.21543e+06	4.34692e+06	1.30043e+07	1.78942e+07	2.59545e+06	2.53219e+06	2.68684e+06	8.77962e+06	6.86929e+06	7.03861e+06	7.03761e+06
1537NEG		SM(d41:2)+HCOO	SM(d41:2)+HCOO	SM	(d41:2)	(d41:2)				C47 H92 O8 N2 P1	843.66	13.76	0.0160756	0.709506	0.0246396	0.450424	1.78609e+07	9.76677e+06	6.97275e+06	1.27857e+07	1.48099e+07	1.20959e+07	8.30832e+06	1.24156e+07	1.85747e+07	1.53024e+07	1.4629e+07	1.71076e+07	1.26314e+07	1.2988e+07	1.26345e+07
1538NEG		SM(d41:2)+HCOO	SM(d41:2)+HCOO	SM	(d41:2)	(d41:2)				C47 H92 O8 N2 P1	843.66	13.488	0.00591174	0.914205	0.497087	0.300573	3.12965e+07	3.57617e+07	1.86396e+07	2.30661e+07	3.44862e+07	2.57297e+07	2.28867e+07	3.45893e+07	3.6883e+07	3.60793e+07	3.15973e+07	3.92081e+07	2.97967e+07	3.01027e+07	3.0105e+07
1539NEG		PC(19:0/18:2)+HCOO	PC(37:2)+HCOO	PC	(19:0/18:2)	(19:0)	(18:2)			C46 H87 O10 N1 P1	844.607	12.464	0.0242452	0.692628	0.00728824	0.837037	5.38448e+07	3.60127e+07	3.41554e+07	3.7595e+07	4.02575e+07	3.59414e+07	3.51369e+07	3.61457e+07	5.75804e+07	6.52511e+07	6.2525e+07	42208038	4.93039e+07	4.7296e+07	4.72837e+07
153POS		DG(17:1/18:2)+NH4	DG(35:3)+NH4	DG	(17:1/18:2)	(17:1)	(18:2)			C38 H72 O5 N1	622.541	11.4846	0.0187351	2.36252	0.0004305	0.216875	9.88644e+06	1.62735e+07	2.76221e+07	5.84186e+06	1.63967e+07	2.5915e+07	2.9595e+07	2.39913e+07	1.15093e+07	5.29544e+06	1.60868e+07	3.02062e+07	1.00181e+07	1.00351e+07	9.70505e+06
1540NEG		PG(20:3/22:5)-H	PG(42:8)-H	PG	(20:3/22:5)	(20:3)	(22:5)			C48 H78 O10 N0 P1	845.534	8.56219	0.0125169	3.91858	0.000391862	0.618472	2.77246e+06	1.22112e+07	1.57083e+07	1.49806e+06	3.64797e+06	4.28529e+06	1.27295e+07	1.48015e+07	3.02687e+06	4.06642e+06	3.12974e+06	1.13531e+07	7.52798e+06	7.53577e+06	7.69622e+06
1542NEG		SM(d41:0)+HCOO	SM(d41:0)+HCOO	SM	(d41:0)	(d41:0)				C47 H96 O8 N2 P1	847.691	15.663	0.00913919	0.456605	0.000276512	0.488795	8.63451e+06	3.68267e+06	3.2184e+06	9.13545e+06	1.24381e+07	6.46948e+06	3.62787e+06	4.68749e+06	1.07091e+07	1.03688e+07	6.5056e+06	4.702e+06	6.76546e+06	6.87393e+06	6.76708e+06
1543NEG		PC(16:1/22:6)+HCOO	PC(38:7)+HCOO	PC	(16:1/22:6)	(16:1)	(22:6)			C47 H79 O10 N1 P1	848.545	9.259	0.00310007	0.7744	0.0515619	0.474516	2.81524e+07	1.41533e+07	1.71949e+07	2.09383e+07	2.29219e+07	1.94222e+07	1.30804e+07	1.46616e+07	2.05056e+07	2.15641e+07	2.10444e+07	2.61297e+07	1.85622e+07	1.86626e+07	1.86618e+07
1544NEG		PC(16:1/22:6)+HCOO	PC(38:7)+HCOO	PC	(16:1/22:6)	(16:1)	(22:6)			C47 H79 O10 N1 P1	848.545	9.00797	0.011536	1.01248	0.876574	0.211619	1.09768e+08	1.28832e+08	9.98453e+07	1.03213e+08	1.2915e+08	1.01294e+08	1.03132e+08	9.38862e+07	1.03106e+08	1.08742e+08	1.04748e+08	1.39962e+08	104005673	1.06093e+08	1.0613e+08
1545NEG		PC(16:1/22:6)+HCOO	PC(38:7)+HCOO	PC	(16:1/22:6)	(16:1)	(22:6)			C47 H79 O10 N1 P1	848.545	8.69094	0.0125362	0.515675	0.000350584	0.720483	2.03212e+07	1.10308e+07	12638741	1.72016e+07	2.07056e+07	1.4333e+07	1.1864e+07	1.1499e+07	2.64372e+07	2.82214e+07	3.05077e+07	1.25796e+07	1.69503e+07	1.73235e+07	1.73239e+07
1546NEG		PS(42:5p)-H	PS(42:5p)-H	PS	(42:5p)	(42:5p)				C48 H83 O9 N1 P1	848.581	13.847	0.00820687	1.41151	0.256675	0.152178	1.15091e+06	4.92063e+06	1.70433e+06	1.73066e+06	2.02974e+06	1.20151e+06	3.18027e+06	2.22469e+06	1.64001e+06	2.13333e+06	1.68627e+06	1.40724e+06	2.04583e+06	2.07511e+06	2.07526e+06
1547NEG		PG(20:0/22:6)-H	PG(42:6)-H	PG	(20:0/22:6)	(20:0)	(22:6)			C48 H82 O10 N0 P1	849.565	9.675	0.0278633	1.0201	0.943152	0.0676808	1.21025e+06	779853	608230	751297	1.84359e+06	1.79111e+06	1.75689e+06	1.07542e+06	969379	1.77074e+06	2.06642e+06	2.7733e+06	2.12717e+06	2.23283e+06	2.23365e+06
1548NEG		SM(d40:0+pO)+HCOO	SM(d40:0+pO)+HCOO	SM	(d40:0+pO)	(d40:0+pO)				C46 H94 O9 N2 P1	849.67	13.536	0.00941057	0.684005	0.00125236	0.310123	5.78292e+06	5.88379e+06	3.29942e+06	6.36264e+06	7.18092e+06	4.1817e+06	4.18807e+06	4.34706e+06	5.52941e+06	6.68535e+06	5.84227e+06	3.67046e+06	5.13214e+06	5.21724e+06	5.13413e+06
1549NEG		PC(16:0/22:6)+HCOO	PC(38:6)+HCOO	PC	(16:0/22:6)	(16:0)	(22:6)			C47 H81 O10 N1 P1	850.56	10.023	0.00969018	0.974929	0.692395	2.49297	3259563052	2725187530	3186218725	3165821806	3548781647	3282770806	2703404052	3016859877	3070453120	3106060700	3182654866	3934185869	3116987387	3118513372	3170356060
154POS		Cer(d18:1/22:0)+H	Cer(d40:1)+H	Cer	(d18:1/22:0)	(d18:1)	(22:0)			C40 H80 O3 N1	622.613	14.4231	0.0153678	1.37848	0.0179458	0.661762	7.1805e+08	1127083013	1382732593	5.86423e+08	960671890	8.27383e+08	1091865604	1079846756	589994130	907579552	1032953003	1101825402	5.62375e+08	5.48337e+08	547075977
1551NEG		PE(24:0/20:4)-H	PE(44:4)-H	PE	(24:0/20:4)	(24:0)	(20:4)			C49 H89 O8 N1 P1	850.633	16.315	0.0211601	3.08673	0.000323471	0.29968	611289	4.44268e+06	3.2796e+06	1.11136e+06	993319	3.15155e+06	3.9198e+06	3.05424e+06	1.22777e+06	1.18339e+06	1.16248e+06	1.56643e+06	2.46391e+06	2.55597e+06	2.46516e+06
1552NEG		PC(16:0/22:5)+HCOO	PC(38:5)+HCOO	PC	(16:0/22:5)	(16:0)	(22:5)			C47 H83 O10 N1 P1	852.576	10.3528	0.0095751	1.06549	0.50687	0.493945	5.57665e+08	687338206	3.94683e+08	4.09221e+08	5.41343e+08	5.01178e+08	5.30496e+08	5.1294e+08	4.77856e+08	5.24616e+08	5.51657e+08	6.36267e+08	5.21164e+08	5.21266e+08	5.29907e+08
1553NEG		PC(16:0/22:5)+HCOO	PC(38:5)+HCOO	PC	(16:0/22:5)	(16:0)	(22:5)			C47 H83 O10 N1 P1	852.576	10.839	0.00688476	1.20538	0.0684608	0.874888	1.72961e+08	225970493	154152451	1.34793e+08	183487585	1.68863e+08	1.77484e+08	2.37528e+08	1.31589e+08	1.62997e+08	1.68029e+08	1.85763e+08	1.72619e+08	1.74221e+08	1.74962e+08
1554NEG		PS(20:4/22:6)-H	PS(42:10)-H	PS	(20:4/22:6)	(20:4)	(22:6)			C48 H73 O10 N1 P1	854.498	9.206	0.021937	0.921241	0.188259	0.224322	1.09701e+07	1.26e+07	1.0321e+07	1.33119e+07	1.28325e+07	1.27077e+07	9.17649e+06	1.04997e+07	1.19778e+07	1.20549e+07	1.2218e+07	1.22822e+07	1.21403e+07	1.23584e+07	1.26807e+07
1555NEG		PC(18:0/20:4)+HCOO	PC(38:4)+HCOO	PC	(18:0/20:4)	(18:0)	(20:4)			C47 H85 O10 N1 P1	854.592	11.227	0.00733366	1.27227	0.138738	0.802834	1.14628e+08	1.98644e+08	8.13394e+07	9.15964e+07	1.11007e+08	9.67378e+07	1.24947e+08	1.58322e+08	1.05472e+08	9.79209e+07	1.06184e+08	1.3748e+08	1.14097e+08	1.15565e+08	1.15552e+08
1556NEG		PC(18:0/20:4)+HCOO	PC(38:4)+HCOO	PC	(18:0/20:4)	(18:0)	(20:4)			C47 H85 O10 N1 P1	854.592	11.591	0.00778119	0.861341	0.0807036	3.60537	2403889033	1792441007	2209717573	2147496215	3101534851	2362228416	2135845947	1841847372	2200893065	2237329837	2558178115	2275985947	2231579905	2257634105	2264893919
1557NEG		PC(18:0/20:4)+HCOO	PC(38:4)+HCOO	PC	(18:0/20:4)	(18:0)	(20:4)			C47 H85 O10 N1 P1	854.592	10.9501	0.010986	0.970065	0.875538	0.409868	1.26828e+08	1.72137e+08	6.76104e+07	8.15078e+07	9.40444e+07	8.48162e+07	7.26283e+07	6.43428e+07	9.02376e+07	9.25169e+07	8.76529e+07	9.41063e+07	9.24912e+07	9.25502e+07	9.42917e+07
1558NEG		PI(16:0/20:5)-H	PI(36:5)-H	PI	(16:0/20:5)	(16:0)	(20:5)			C45 H76 O13 N0 P1	855.503	8.18422	0.0668648	0.678677	0.0060111	0.306501	7.2622e+06	4.36047e+06	3.74651e+06	6.67405e+06	5.24763e+06	3.99616e+06	6.12694e+06	3.61899e+06	5.43281e+06	7.25274e+06	8.17446e+06	5.32781e+06	7.91496e+06	7.05853e+06	7.06957e+06
1559NEG		PI(16:0/20:5)-H	PI(36:5)-H	PI	(16:0/20:5)	(16:0)	(20:5)			C45 H76 O13 N0 P1	855.503	7.90044	0.00366537	0.855973	0.256353	0.149575	4.1844e+06	4.00111e+06	3.31995e+06	3.77351e+06	3.29225e+06	2.17514e+06	4.9545e+06	3.48687e+06	3.74175e+06	5.63885e+06	4.66681e+06	3.71649e+06	4.49563e+06	4.49563e+06	4.52424e+06
155POS		DG(17:1/18:1)+NH4	DG(35:2)+NH4	DG	(17:1/18:1)	(17:1)	(18:1)			C38 H74 O5 N1	624.556	12.3355	0.041622	3.50368	7.81268e-05	0.191756	5.08191e+06	9.21314e+06	1.89824e+07	2.10001e+06	6.77268e+06	1.62944e+07	1.42912e+07	1.89896e+07	4.7325e+06	2.48239e+06	4.7897e+06	1.3182e+07	5.64671e+06	5.42393e+06	5.19538e+06
1561NEG		PS(20:3/22:6)-H	PS(42:9)-H	PS	(20:3/22:6)	(20:3)	(22:6)			C48 H75 O10 N1 P1	856.513	10.27	0.0626496	1.09932	0.366403	0.0852292	1.49388e+07	2.14827e+07	1.18504e+07	1.49124e+07	1.18653e+07	1.68877e+07	1.29218e+07	1.46012e+07	1.48791e+07	1.46435e+07	1.35565e+07	1.54737e+07	1.43128e+07	1.43058e+07	1.59203e+07
1562NEG		PC(18:0/20:3)+HCOO	PC(38:3)+HCOO	PC	(18:0/20:3)	(18:0)	(20:3)			C47 H87 O10 N1 P1	856.607	11.6782	0.0146003	0.845538	0.079938	1.53283	4.20987e+08	2.83634e+08	3.40446e+08	3.46434e+08	4.86367e+08	4.14755e+08	3.38802e+08	2.94709e+08	3.44373e+08	3.47427e+08	4.49689e+08	3.52953e+08	3.43456e+08	352308611	3.52272e+08
1563NEG		PC(18:0/20:3)+HCOO	PC(38:3)+HCOO	PC	(18:0/20:3)	(18:0)	(20:3)			C47 H87 O10 N1 P1	856.607	12.556	0.0167311	0.730786	0.1219	1.00046	1.06596e+08	1.26693e+08	3.07108e+07	1.11773e+08	1.72681e+08	1.03132e+08	1.0991e+08	4.74498e+07	1.09615e+08	1.06049e+08	1.10477e+08	1.06217e+08	1.04549e+08	1.0766e+08	1.07616e+08
1564NEG		PC(18:0/20:3)+HCOO	PC(38:3)+HCOO	PC	(18:0/20:3)	(18:0)	(20:3)			C47 H87 O10 N1 P1	856.607	12.121	0.0118669	0.786873	0.0693478	2.13318	6.82769e+08	4.62383e+08	384609267	4.95646e+08	7.45914e+08	5.29954e+08	3.86225e+08	3.60272e+08	4.76543e+08	4.94784e+08	4.5199e+08	5.10729e+08	4.86922e+08	4.97121e+08	497015832
1565NEG		PI(18:2/18:2)-H	PI(36:4)-H	PI	(18:2/18:2)	(18:2)	(18:2)			C45 H78 O13 N0 P1	857.519	8.3006	0.00524539	0.746266	0.267781	0.179815	1.4413e+06	4.16058e+06	2.68639e+06	5.21912e+06	4.49723e+06	2.80471e+06	6.10492e+06	4.01957e+06	5.57229e+06	7.76444e+06	8.97802e+06	5.20314e+06	5.58776e+06	5.63851e+06	5.63916e+06
1566NEG		PI(18:2/18:2)-H	PI(36:4)-H	PI	(18:2/18:2)	(18:2)	(18:2)			C45 H78 O13 N0 P1	857.519	8.91686	0.0202292	1.20515	0.335358	0.125519	2.88199e+06	5.37592e+06	2.35708e+06	2.43771e+06	3.37815e+06	2.07448e+06	4.66559e+06	4.27191e+06	3.38831e+06	4.26646e+06	3.98136e+06	5.76043e+06	3.65405e+06	3.78398e+06	3.78627e+06
1567NEG		SM(d22:1/20:1)+HCOO	SM(d42:2)+HCOO	SM	(d22:1/20:1)	(d22:1)	(20:1)			C48 H94 O8 N2 P1	857.675	14.208	0.00441996	1.0201	0.783036	0.792772	1041003936	1289227899	1031071712	9.3915e+08	1426106560	1056981917	1102110288	1114840325	1054640710	1121343323	1109840379	1232392008	1102746966	1111320882	1102969933
1568NEG		PC(20:1/18:1)+HCOO	PC(38:2)+HCOO	PC	(20:1/18:1)	(20:1)	(18:1)			C47 H89 O10 N1 P1	858.623	12.843	0.0135856	0.881947	0.158525	0.551333	5.41839e+07	5.98009e+07	4.66518e+07	4.67215e+07	7.66355e+07	4.78239e+07	5.01297e+07	5.73479e+07	5.93562e+07	6.18802e+07	5.72765e+07	5.22665e+07	5.47663e+07	5.60799e+07	5.60713e+07
156POS		Cer(d18:0/22:0)+H	Cer(d40:0)+H	Cer	(d18:0/22:0)	(d18:0)	(22:0)			C40 H82 O3 N1	624.629	14.8709	0.0184122	0.837895	0.218475	0.257934	3.70976e+07	3.95939e+07	5.19093e+07	4.74043e+07	6.64707e+07	4.76434e+07	4.08093e+07	4.3424e+07	4.26743e+07	6.97181e+07	4.17498e+07	3.22743e+07	3.13233e+07	3.03704e+07	3.03217e+07
1570NEG		PI(16:0/20:3)-H	PI(36:3)-H	PI	(16:0/20:3)	(16:0)	(20:3)			C45 H80 O13 N0 P1	859.534	10.037	0.255477	0.856004	0.486957	0.439335	4.4519e+07	5.97822e+07	2.30213e+07	7.55123e+07	2.96827e+07	3.98741e+07	2.50651e+07	3.61565e+07	3.23784e+07	5.1175e+07	5.19695e+07	6.02647e+07	1.9253e+07	3.13331e+07	3.13414e+07
1572NEG		SM(d42:1)+HCOO	SM(d42:1)+HCOO	SM	(d42:1)	(d42:1)				C48 H96 O8 N2 P1	859.691	14.7865	0.0137949	0.693622	0.122201	0.6684	3.14893e+07	3.72526e+07	3.03182e+07	4.87919e+07	8.78627e+07	4.4553e+07	3.71933e+07	3.49748e+07	4.84016e+07	6.46457e+07	2.77896e+07	3.00241e+07	4.14656e+07	4.24718e+07	4.24729e+07
1573NEG		PS(42:7)-H	PS(42:7)-H	PS	(42:7)	(42:7)				C48 H79 O10 N1 P1	860.545	12.449	0.0342418	2.08678	0.00252552	0.763507	1.2698e+07	4.49534e+07	2.20456e+07	1.54721e+07	1.92299e+07	2.43586e+07	2.59411e+07	3.57166e+07	1.1583e+07	1.15906e+07	1.4319e+07	2.41367e+07	2.34051e+07	2.34619e+07	2.48505e+07
1574NEG		PC(16:0/22:1)+HCOO	PC(38:1)+HCOO	PC	(16:0/22:1)	(16:0)	(22:1)			C47 H91 O10 N1 P1	860.639	14.168	0.0285678	0.823934	0.101234	0.381496	1.67703e+07	2.1036e+07	1.16194e+07	1.68343e+07	1.60882e+07	1.17865e+07	1.56267e+07	1.35527e+07	1.75293e+07	2.27758e+07	1.69811e+07	1.45223e+07	1.63229e+07	1.71585e+07	1.71577e+07
1575NEG		PI(18:1/18:1)-H	PI(36:2)-H	PI	(18:1/18:1)	(18:1)	(18:1)			C45 H82 O13 N0 P1	861.55	10.52	0.0217186	1.27361	0.297178	1.47955	2.38305e+08	4.81628e+08	2.22868e+08	3.41427e+08	3.74294e+08	2.77113e+08	7.42664e+08	4.50203e+08	469108157	4.34675e+08	4.10031e+08	7.13872e+08	4.75498e+08	4.93515e+08	4.75311e+08
1576NEG		SM(d42:0)+HCOO	SM(d42:0)+HCOO	SM	(d42:0)	(d42:0)				C48 H98 O8 N2 P1	861.707	16.446	0.00519481	0.463397	0.00143913	0.680066	1.35787e+07	8.73556e+06	7.48525e+06	2.16198e+07	2.66083e+07	1.36892e+07	8.78139e+06	8.58064e+06	1.99075e+07	2.42583e+07	1.30464e+07	7.88098e+06	1.3749e+07	1.38723e+07	1.37474e+07
1577NEG		PS(42:6)-H	PS(42:6)-H	PS	(42:6)	(42:6)				C48 H81 O10 N1 P1	862.56	12.892	0.026142	1.3175	0.0875125	0.371298	1.23832e+07	2.98719e+07	1.65434e+07	1.17846e+07	1.70846e+07	1.61803e+07	16316136	1.67287e+07	1.41847e+07	1.41674e+07	1.54707e+07	1.6446e+07	1.70788e+07	1.74264e+07	1.79854e+07
1578NEG		PS(42:6)-H	PS(42:6)-H	PS	(42:6)	(42:6)				C48 H81 O10 N1 P1	862.56	13.321	0.0478767	0.672644	0.116707	0.290764	6.82306e+06	6.50535e+06	2.52117e+06	6.57366e+06	3.63673e+06	4.63278e+06	5.87423e+06	4.59641e+06	6.55757e+06	1.29347e+07	6.56988e+06	4.85804e+06	6.77282e+06	6.22017e+06	6.75922e+06
1579NEG		PS(42:6)-H	PS(42:6)-H	PS	(42:6)	(42:6)				C48 H81 O10 N1 P1	862.56	9.246	0.013229	0.896796	0.338303	0.1449	6.04993e+06	6.791e+06	3.77821e+06	5.58254e+06	4.85382e+06	5.01072e+06	3.14455e+06	4.94961e+06	5.16034e+06	5.69166e+06	4.93539e+06	5.26882e+06	4.74845e+06	4.85453e+06	4.86288e+06
157POS		LPC(24:1)+Na	LPC(24:1)+Na	LPC	(24:1)	(24:1)				C32 H64 O7 N1 P1 Na1	628.431	7.02547	0.0333484	2.44322	0.00100198	0.0831506	1.53699e+06	4.41411e+06	4.67834e+06	537637	2.42631e+06	2.2754e+06	3.40184e+06	3.86848e+06	1.5974e+06	877891	2.53847e+06	4.60837e+06	1.58118e+06	1.50244e+06	1.4862e+06
1580NEG		PC(18:0p/22:6)+HCOO	PC(40:6p)+HCOO	PC	(18:0p/22:6)	(18:0p)	(22:6)			C49 H85 O9 N1 P1	862.597	10.9829	0.0159412	1.97345	0.00165364	0.537621	4.64254e+06	1.62969e+07	1.71187e+07	4.39817e+06	8.37375e+06	8.03313e+06	1.51949e+07	1.38034e+07	7.31556e+06	7.80897e+06	9.20975e+06	1.19421e+07	1.02257e+07	1.02795e+07	1.05344e+07
1581NEG		PI(18:0/18:1)-H	PI(36:1)-H	PI	(18:0/18:1)	(18:0)	(18:1)			C45 H84 O13 N0 P1	863.566	11.432	0.0114227	1.64335	0.0282834	0.643968	1.67828e+07	4.08978e+07	1.91098e+07	2.30303e+07	2.08721e+07	2.00075e+07	5.0382e+07	3.74079e+07	2.5141e+07	2.28467e+07	1.98998e+07	4.34853e+07	3.20387e+07	3.20368e+07	3.14081e+07
1582NEG		PC(17:0/22:6)+HCOO	PC(39:6)+HCOO	PC	(17:0/22:6)	(17:0)	(22:6)			C48 H83 O10 N1 P1	864.576	10.648	0.00991652	1.13094	0.0931142	0.176764	2.28133e+07	2.52615e+07	2.85677e+07	2.02239e+07	2.38226e+07	2.46107e+07	1.94007e+07	2.68833e+07	2.4969e+07	2.32279e+07	2.02791e+07	2.83333e+07	2.22504e+07	2.22585e+07	2.26389e+07
1584NEG		PG(22:6/22:6)-H	PG(44:12)-H	PG	(22:6/22:6)	(22:6)	(22:6)			C50 H74 O10 N0 P1	865.503	7.589	0.0169268	2.25792	0.000963828	0.197802	656997	1.15929e+06	1.94513e+06	470660	1.05206e+06	2.31848e+06	1.5727e+06	1.80664e+06	686647	774043	778791	1.17595e+06	1.25819e+06	1.25926e+06	1.29598e+06
1585NEG		PI(18:0/18:0)-H	PI(36:0)-H	PI	(18:0/18:0)	(18:0)	(18:0)			C45 H86 O13 N0 P1	865.581	12.52	0.00634008	1.45115	0.174879	0.217642	3.68657e+06	6.50372e+06	5.03107e+06	5.27043e+06	4.33317e+06	2.90229e+06	1.26741e+07	5.24929e+06	4.4245e+06	5.07181e+06	3.92038e+06	6.39501e+06	6.00017e+06	5.99961e+06	5.93425e+06
1586NEG		PC(17:0/22:5)+HCOO	PC(39:5)+HCOO	PC	(17:0/22:5)	(17:0)	(22:5)			C48 H85 O10 N1 P1	866.592	11.007	0.0263765	1.4767	0.036775	0.283934	6.09818e+06	1.29232e+07	6.01065e+06	4.66247e+06	5.92261e+06	5.96146e+06	7.24569e+06	9.29213e+06	5.37034e+06	5.0759e+06	6.99473e+06	8.95823e+06	7.17393e+06	6.84984e+06	7.17128e+06
1587NEG		PC(20:0p/20:4)+HCOO	PC(40:4p)+HCOO	PC	(20:0p/20:4)	(20:0p)	(20:4)			C49 H89 O9 N1 P1	866.628	13.585	0.00809069	1.35178	0.0362252	0.158006	1.76438e+06	1.76091e+06	3.33281e+06	2.09203e+06	2.85431e+06	2.72341e+06	3.47536e+06	3.34966e+06	1.86206e+06	2.42695e+06	2.44162e+06	3.52762e+06	2.59868e+06	2.63537e+06	2.59888e+06
1588NEG		PC(20:0p/20:4)+HCOO	PC(40:4p)+HCOO	PC	(20:0p/20:4)	(20:0p)	(20:4)			C49 H89 O9 N1 P1	866.628	12.4082	0.0112508	1.6069	0.0207685	0.254143	2.27871e+06	7.43261e+06	4.33433e+06	2.72297e+06	3.45181e+06	2.68764e+06	4.83914e+06	4.53712e+06	3.16888e+06	3.02992e+06	2.9122e+06	4.39361e+06	3.69867e+06	3.62658e+06	3.69767e+06
158POS		LPC(24:0)+Na	LPC(24:0)+Na	LPC	(24:0)	(24:0)				C32 H66 O7 N1 P1 Na1	630.447	8.37253	0.0101971	1.6437	0.00362921	0.10614	6.41793e+06	1.01948e+07	1.48714e+07	4.62022e+06	1.00825e+07	1.19608e+07	1.23536e+07	1.19183e+07	7.33861e+06	7.12113e+06	1.14086e+07	1.59369e+07	6.98623e+06	6.98402e+06	6.86249e+06
1590NEG		PG(22:5/22:6)-H	PG(44:11)-H	PG	(22:5/22:6)	(22:5)	(22:6)			C50 H76 O10 N0 P1	867.518	7.27286	0.00874858	2.39306	8.24172e-05	0.566861	4.53603e+06	1.153e+07	14469989	3.39084e+06	6.71244e+06	7.71857e+06	1.36524e+07	1.33585e+07	5.28903e+06	4.83291e+06	6.35603e+06	1.37361e+07	8.16847e+06	8.29279e+06	8.29422e+06
1591NEG		PC(19:0/20:4)+HCOO	PC(39:4)+HCOO	PC	(19:0/20:4)	(19:0)	(20:4)			C48 H87 O10 N1 P1	868.607	12.234	0.00961319	0.816222	0.0921734	0.449381	3.1897e+07	2.49703e+07	2.0766e+07	2.06607e+07	2.17506e+07	1.81803e+07	1.76675e+07	2.34094e+07	2.90393e+07	3.21727e+07	2.86544e+07	2.90096e+07	2.41494e+07	2.45581e+07	2.45539e+07
1592NEG		PC(20:0e/20:4)+HCOO	PC(40:4e)+HCOO	PC	(20:0e/20:4)	(20:0e)	(20:4)			C49 H91 O9 N1 P1	868.644	13.829	0.00402759	1.35986	0.0718976	0.229193	3.05849e+06	5.15063e+06	7.43117e+06	4.39699e+06	7.67326e+06	5.63253e+06	9.73125e+06	7.22569e+06	5.05547e+06	5.76094e+06	4.71962e+06	6.52864e+06	5.92136e+06	5.96357e+06	5.92301e+06
1593NEG		PG(22:4/22:6)-H	PG(44:10)-H	PG	(22:4/22:6)	(22:4)	(22:6)			C50 H78 O10 N0 P1	869.534	7.87029	0.0100284	3.47695	0.000660668	0.615702	2.87653e+06	1.43582e+07	1.49456e+07	2.40688e+06	4.39286e+06	4.71507e+06	1.30996e+07	16542952	3.77976e+06	3.88742e+06	3.77415e+06	9.76341e+06	7.45174e+06	7.58337e+06	7.58199e+06
1594NEG		PI(17:0/20:4)-H	PI(37:4)-H	PI	(17:0/20:4)	(17:0)	(20:4)			C46 H80 O13 N0 P1	871.534	9.759	0.00778826	1.04811	0.673619	0.378088	7.59952e+07	7.98532e+07	5.1808e+07	5.72546e+07	6.80558e+07	5.32733e+07	8.26778e+07	9.26765e+07	6.2165e+07	7.38686e+07	8.1068e+07	7.82484e+07	7.86683e+07	7.97349e+07	7.86694e+07
1595NEG		PI(18:0e/20:4)-H	PI(38:4e)-H	PI	(18:0e/20:4)	(18:0e)	(20:4)			C47 H84 O12 N0 P1	871.571	10.999	0.00953042	2.31958	0.000433719	0.384627	1.62692e+06	7.06427e+06	4.90367e+06	2.08838e+06	3.40937e+06	7.03304e+06	8.52933e+06	6.73354e+06	2.49769e+06	3.80322e+06	3.2465e+06	4.40838e+06	4.86185e+06	4.94343e+06	4.94256e+06
1596NEG		SM(d43:2)+HCOO	SM(d43:2)+HCOO	SM	(d43:2)	(d43:2)				C49 H96 O8 N2 P1	871.691	14.958	0.00721277	0.994917	0.958466	0.0997873	1.11921e+07	1.10144e+07	9.12589e+06	8.80355e+06	1.2572e+07	1.03092e+07	8.72275e+06	1.38838e+07	1.26456e+07	1.01787e+07	1.13281e+07	1.3325e+07	1.08672e+07	1.1004e+07	1.08681e+07
1597NEG		PC(18:3/22:6)+HCOO	PC(40:9)+HCOO	PC	(18:3/22:6)	(18:3)	(22:6)			C49 H79 O10 N1 P1	872.545	8.11063	0.00723717	1.14935	0.400734	0.14557	7.10818e+06	6.45085e+06	3.72789e+06	3.26931e+06	4.50085e+06	4.09099e+06	6.78928e+06	7.7638e+06	4.72452e+06	4.56621e+06	5.26863e+06	5.01136e+06	4.28623e+06	4.28695e+06	4.23309e+06
1598NEG		SM(d43:1)+HCOO	SM(d43:1)+HCOO	SM	(d43:1)	(d43:1)				C49 H98 O8 N2 P1	873.707	16.644	0.00999414	0.787282	0.0421488	0.355944	1.58849e+07	1.05916e+07	8.03423e+06	1.06971e+07	1.25992e+07	1.03382e+07	8.4298e+06	1.15341e+07	1.55283e+07	1.20052e+07	1.32431e+07	1.40213e+07	1.14186e+07	1.16214e+07	1.14266e+07
159POS		DG(14:0/22:6)+NH4	DG(36:6)+NH4	DG	(14:0/22:6)	(14:0)	(22:6)			C39 H68 O5 N1	630.509	10.3734	0.0578536	4.82147	0.00017204	0.462994	1.32782e+07	3.24859e+07	9.27988e+07	7.71478e+06	2.8967e+07	7.90773e+07	6.75744e+07	9.65328e+07	1.93747e+07	6.86345e+06	1.94739e+07	9.28109e+07	2.41112e+07	2.18654e+07	2.18278e+07
15POS		AcCa(16:1)+H	AcCa(16:1)+H	AcCa	(16:1)	(16:1)				C23 H44 O4 N1	398.326	2.31588	0.0200296	1.36225	0.401628	0.160711	6.12157e+07	5.96455e+07	4.69416e+07	2.0031e+07	7.68998e+07	1.70487e+07	1.20842e+08	3.32019e+07	2.01223e+07	2.68363e+07	5.60993e+07	7.81471e+07	3.0341e+07	3.03262e+07	2.92934e+07
1600NEG		SM(d42:1+pO)+HCOO	SM(d42:1+pO)+HCOO	SM	(d42:1+pO)	(d42:1+pO)				C48 H96 O9 N2 P1	875.686	13.444	0.00848049	1.1046	0.431978	0.151418	6.81291e+06	1.20831e+07	6.45737e+06	6.69773e+06	8.78951e+06	6.57569e+06	8.20126e+06	8.39621e+06	7.10114e+06	8.0033e+06	6.58952e+06	6.88208e+06	7.78506e+06	7.90066e+06	7.78642e+06
1601NEG		PC(18:1/22:6)+HCOO	PC(40:7)+HCOO	PC	(18:1/22:6)	(18:1)	(22:6)			C49 H83 O10 N1 P1	876.576	10.1137	0.0124076	0.856453	0.0649716	1.62169	3.9073e+08	4.03416e+08	2.94244e+08	3.74536e+08	4.00277e+08	3.18073e+08	2.90383e+08	2.778e+08	3.55224e+08	4.38233e+08	3.67683e+08	4.08781e+08	353045001	3.53138e+08	3.60734e+08
1602NEG		PC(18:1/22:6)+HCOO	PC(40:7)+HCOO	PC	(18:1/22:6)	(18:1)	(22:6)			C49 H83 O10 N1 P1	876.576	9.73698	0.0334654	0.851134	0.352028	0.336504	2.59948e+07	2.50681e+07	2.40968e+07	2.14793e+07	2.4359e+07	1.83965e+07	2.4334e+07	2.5259e+07	2.01281e+07	2.72654e+07	2.28577e+07	3.77835e+06	2.28638e+07	2.28636e+07	2.15636e+07
1603NEG		SM(d42:0+pO)+HCOO	SM(d42:0+pO)+HCOO	SM	(d42:0+pO)	(d42:0+pO)				C48 H98 O9 N2 P1	877.702	15.047	0.00767054	0.702406	0.000205149	0.355905	7.94618e+06	7.33567e+06	4.9841e+06	8.10732e+06	9.27766e+06	6.37244e+06	5.46984e+06	5.90151e+06	7.85091e+06	8.7927e+06	7.98042e+06	5.02528e+06	7.07462e+06	7.16799e+06	7.17085e+06
1604NEG		PC(18:0/22:6)+HCOO	PC(40:6)+HCOO	PC	(18:0/22:6)	(18:0)	(22:6)			C49 H85 O10 N1 P1	878.592	11.24	0.0087527	0.94845	0.483317	2.2795	1612164264	1119661644	1682864791	1696397781	1888206975	1757216084	1570561110	1489516102	1571667661	1607928624	1642141264	1882237594	1606742677	1625626379	1634553993
1606NEG		PC(18:0/22:5)+HCOO	PC(40:5)+HCOO	PC	(18:0/22:5)	(18:0)	(22:5)			C49 H87 O10 N1 P1	880.607	11.617	0.02559	1.04064	0.534899	0.373565	1.00134e+08	9.34055e+07	8.94939e+07	103500697	1.07814e+08	9.86947e+07	1.1107e+08	110579517	8.92951e+07	9.355e+07	1.09713e+08	1.25312e+08	1.08087e+08	1.12976e+08	1.08138e+08
1607NEG		PI(18:2/20:4)-H	PI(38:6)-H	PI	(18:2/20:4)	(18:2)	(20:4)			C47 H78 O13 N0 P1	881.519	8.13322	0.00679884	0.926566	0.643631	0.139969	7.40751e+06	7.88042e+06	7.04842e+06	7.538e+06	8.08307e+06	5.28086e+06	1.21387e+07	9.61095e+06	8.92371e+06	1.34881e+07	1.17499e+07	1.10313e+07	1.00592e+07	1.01778e+07	1.01794e+07
1608NEG		PI(16:0/22:6)-H	PI(38:6)-H	PI	(16:0/22:6)	(16:0)	(22:6)			C47 H78 O13 N0 P1	881.519	8.60168	0.00371256	0.904448	0.316449	0.41803	4.63428e+07	4.49418e+07	3.59788e+07	4.19885e+07	4.15662e+07	31710959	4.55877e+07	3.95179e+07	4.09997e+07	5.62177e+07	5.20696e+07	5.47707e+07	4.89518e+07	4.92673e+07	4.92686e+07
1609NEG		PC(18:0/22:4)+HCOO	PC(40:4)+HCOO	PC	(18:0/22:4)	(18:0)	(22:4)			C49 H89 O10 N1 P1	882.623	12.5	0.0146073	1.20919	0.0456687	0.549391	3.84914e+07	6.83798e+07	5.03435e+07	4.55326e+07	5.07024e+07	4.2306e+07	5.49742e+07	6.16618e+07	4.27866e+07	4.55631e+07	4.84426e+07	5.06529e+07	4.80158e+07	4.925e+07	4.9253e+07
160POS		Cer(d41:4)+H	Cer(d41:4)+H	Cer	(d41:4)	(d41:4)				C41 H76 O3 N1	630.582	13.533	0.0148506	1.08862	0.462908	0.231395	8.26862e+07	1.05983e+08	9.7999e+07	6.75762e+07	7.73177e+07	8.71521e+07	6.13673e+07	1.13436e+08	7.44104e+07	9.67183e+07	9.39623e+07	7.03947e+07	4.30427e+07	4.19375e+07	4.30272e+07
1610NEG		PC(20:0/20:4)+HCOO	PC(40:4)+HCOO	PC	(20:0/20:4)	(20:0)	(20:4)			C49 H89 O10 N1 P1	882.623	12.907	0.0283769	0.555831	0.0127228	0.664959	2.32303e+07	1.77459e+07	8.21001e+06	2.07812e+07	1.75413e+07	1.10171e+07	1.23025e+07	1.51074e+07	2.00292e+07	3.88176e+07	2.0288e+07	1.38156e+07	1.88529e+07	1.98125e+07	1.98092e+07
1611NEG		PI(18:0/20:5)-H	PI(38:5)-H	PI	(18:0/20:5)	(18:0)	(20:5)			C47 H80 O13 N0 P1	883.534	9.67497	0.00808294	0.842091	0.268008	0.738138	9.65443e+07	8.00097e+07	3.48333e+07	8.31683e+07	8.96473e+07	6.43057e+07	1.20062e+08	7.67413e+07	7.72341e+07	9.56782e+07	1.09981e+08	8.90954e+07	9.56909e+07	9.56388e+07	9.43325e+07
1612NEG		PI(18:1/20:4)-H	PI(38:5)-H	PI	(18:1/20:4)	(18:1)	(20:4)			C47 H80 O13 N0 P1	883.534	9.25324	0.0096721	0.892423	0.454194	1.17729	3.53459e+08	3.88041e+08	2.19237e+08	2.73769e+08	2.68981e+08	1.81892e+08	3.81281e+08	2.82751e+08	276739430	4.378e+08	4.0567e+08	3.46296e+08	3.4573e+08	3.51483e+08	3.45592e+08
1613NEG		SM(d44:3)+HCOO	SM(d44:3)+HCOO	SM	(d44:3)	(d44:3)				C50 H96 O8 N2 P1	883.691	14.371	0.0193225	1.70249	0.00618871	0.188968	896075	3.00407e+06	1.8583e+06	1.30323e+06	1.93335e+06	1.59449e+06	2.3494e+06	2.52157e+06	1.20379e+06	1.03518e+06	1.34434e+06	1.80849e+06	1.66799e+06	1.72618e+06	1.72394e+06
1614NEG		PC(18:0/22:3)+HCOO	PC(40:3)+HCOO	PC	(18:0/22:3)	(18:0)	(22:3)			C49 H91 O10 N1 P1	884.639	13.548	0.00844456	0.751469	0.0780992	0.223614	4.84775e+06	5.53951e+06	2.74539e+06	5.02581e+06	3.97838e+06	2.41317e+06	4.07572e+06	3.57776e+06	3.99444e+06	6.45387e+06	4.20401e+06	3.06853e+06	4.1681e+06	4.22952e+06	4.1684e+06
1615NEG		PC(22:1/18:2)+HCOO	PC(40:3)+HCOO	PC	(22:1/18:2)	(22:1)	(18:2)			C49 H91 O10 N1 P1	884.639	13.169	0.010886	1.08108	0.80966	0.189513	3.66378e+06	1.35704e+07	3.71729e+06	3.8314e+06	4.61193e+06	3.13053e+06	5.31767e+06	4.54675e+06	8.58492e+06	6.64764e+06	4.91144e+06	4.58345e+06	4.47739e+06	4.55109e+06	4.45845e+06
1616NEG		PI(18:0/20:4)-H	PI(38:4)-H	PI	(18:0/20:4)	(18:0)	(20:4)			C47 H82 O13 N0 P1	885.55	10.3728	0.013	1.11186	0.19866	3.28662	5026927960	4988064214	6585990112	4408532097	6046109260	6157407532	6109267803	4798501957	4303742273	5286124832	5992326192	5899424191	5852443391	5986972914	5985473489
1617NEG		PI(18:1/20:3)-H	PI(38:4)-H	PI	(18:1/20:3)	(18:1)	(20:3)			C47 H82 O13 N0 P1	885.55	9.92925	0.0265465	1.2219	0.240248	0.306486	2.05672e+07	3.38351e+07	1.29148e+07	1.58786e+07	1.85519e+07	1.51034e+07	2.60227e+07	2.42474e+07	1.62652e+07	1.74102e+07	2.01815e+07	2.08859e+07	2.27529e+07	2.17251e+07	2.1751e+07
1618NEG		SM(d44:2)+HCOO	SM(d44:2)+HCOO	SM	(d44:2)	(d44:2)				C50 H98 O8 N2 P1	885.707	15.732	0.0059466	1.06672	0.473097	0.0988118	3.26104e+06	4.95383e+06	4.11309e+06	3.46772e+06	5.21122e+06	3.58302e+06	4.14834e+06	4.43289e+06	3.82673e+06	3.61535e+06	4.00318e+06	3.71437e+06	3.92515e+06	3.92423e+06	3.88441e+06
1619NEG		PC(22:0/18:2)+HCOO	PC(40:2)+HCOO	PC	(22:0/18:2)	(22:0)	(18:2)			C49 H93 O10 N1 P1	886.654	14.629	0.00752655	0.887569	0.40021	0.114697	2.17567e+06	3.36628e+06	1.81609e+06	2.92e+06	2.34894e+06	2.37814e+06	2.86001e+06	2.47427e+06	2.29532e+06	3.97268e+06	3.20835e+06	2.12373e+06	2.67414e+06	2.70912e+06	2.67409e+06
161POS		DG(37:4)+H	DG(37:4)+H	DG	(37:4)	(37:4)				C40 H71 O5	631.53	13.4511	0.0155189	2.20873	0.000943109	0.15563	7.95416e+06	1.40409e+07	1.74172e+07	7.41831e+06	1.02532e+07	2.05631e+07	1.3673e+07	1.84044e+07	6.10364e+06	6.78073e+06	3.84735e+06	9.4574e+06	7.25905e+06	7.07033e+06	7.26831e+06
1620NEG		PC(18:1/22:1)+HCOO	PC(40:2)+HCOO	PC	(18:1/22:1)	(18:1)	(22:1)			C49 H93 O10 N1 P1	886.654	14.231	0.00774307	1.27873	0.160918	0.182851	2.1438e+06	6.57213e+06	4.08248e+06	3.33246e+06	3.37542e+06	3.10218e+06	4.91735e+06	4.42922e+06	3.27294e+06	4.10283e+06	4.08256e+06	2.86761e+06	3.64208e+06	3.66832e+06	3.69886e+06
1621NEG		PI(18:0/20:3)-H	PI(38:3)-H	PI	(18:0/20:3)	(18:0)	(20:3)			C47 H84 O13 N0 P1	887.566	10.6393	0.00377878	1.00078	0.996183	1.20678	5.36584e+08	5.0274e+08	2.59132e+08	3.33073e+08	5.21316e+08	3.63956e+08	4.84739e+08	3.15777e+08	4.05369e+08	3.7569e+08	4.10489e+08	6.58186e+08	4.74944e+08	4.78056e+08	4.74937e+08
1622NEG		PI(18:0/20:3)-H	PI(38:3)-H	PI	(18:0/20:3)	(18:0)	(20:3)			C47 H84 O13 N0 P1	887.566	11.191	0.0229617	1.38725	0.163452	1.28566	176878287	3.40399e+08	8.78298e+07	1.46513e+08	263008448	1.76622e+08	3.17709e+08	2.41456e+08	1.38212e+08	1.15782e+08	1.68488e+08	2.35558e+08	2.1416e+08	2.22765e+08	2.14109e+08
1623NEG		SM(d44:1)+HCOO	SM(d44:1)+HCOO	SM	(d44:1)	(d44:1)				C50 H100 O8 N2 P1	887.722	17.379	0.0157549	0.915178	0.246364	0.0857012	1.95819e+06	1.65223e+06	2.11022e+06	1.80284e+06	2.06987e+06	2.2711e+06	1.47459e+06	1.74517e+06	1.9807e+06	1.94616e+06	2.29084e+06	1.77329e+06	1.80785e+06	1.85812e+06	1.85808e+06
1624NEG		PC(16:0/24:1)+HCOO	PC(40:1)+HCOO	PC	(16:0/24:1)	(16:0)	(24:1)			C49 H95 O10 N1 P1	888.67	15.545	0.00221361	1.54787	0.0081128	0.176341	2.18024e+06	3.0379e+06	2.7856e+06	1.32951e+06	1.77462e+06	2.31846e+06	2.42511e+06	4.12613e+06	1.88807e+06	2.31656e+06	1.65022e+06	2.5489e+06	1.91286e+06	1.90556e+06	1.90553e+06
1625NEG		PC(20:0p/22:6)+HCOO	PC(42:6p)+HCOO	PC	(20:0p/22:6)	(20:0p)	(22:6)			C51 H89 O9 N1 P1	890.628	13.143	0.00402475	1.21506	0.271908	0.158644	2.6085e+06	2.26279e+06	4.79446e+06	3.4588e+06	4.44644e+06	5.40888e+06	3.252e+06	3.20102e+06	2.76103e+06	3.76692e+06	3.10385e+06	5.55889e+06	3.50249e+06	3.52929e+06	3.52381e+06
1626NEG		PC(16:0/24:0)+HCOO	PC(40:0)+HCOO	PC	(16:0/24:0)	(16:0)	(24:0)			C49 H97 O10 N1 P1	890.686	17.175	0.000173356	1.64846	0.000282083	0.179646	1.04849e+06	1.80985e+06	2.43959e+06	1.0209e+06	1.47452e+06	1.97633e+06	2.25447e+06	1.8075e+06	1.31608e+06	1.64868e+06	1.1492e+06	2.33594e+06	1.54627e+06	1.54627e+06	1.54581e+06
1627NEG		PC(16:0/24:0)+HCOO	PC(40:0)+HCOO	PC	(16:0/24:0)	(16:0)	(24:0)			C49 H97 O10 N1 P1	890.686	15.3583	0.0515472	6.49613	0.11222	0.343631	304670	1.67841e+06	3.93033e+06	375899	523720	1.05845e+07	799891	1.72e+06	461028	631145	662459	508443	1.81221e+06	1.8174e+06	1.98174e+06
1628NEG		PC(19:0/22:6)+HCOO	PC(41:6)+HCOO	PC	(19:0/22:6)	(19:0)	(22:6)			C50 H87 O10 N1 P1	892.607	11.846	0.0342284	0.88971	0.302046	0.177571	8.1888e+06	6.97887e+06	8.00022e+06	8.04969e+06	5.38906e+06	7.05535e+06	5.41169e+06	7.34126e+06	1.02822e+07	9.44772e+06	7.56746e+06	8.74157e+06	8.10139e+06	8.09523e+06	8.58807e+06
1629NEG		PI(17:0/22:6)-H	PI(39:6)-H	PI	(17:0/22:6)	(17:0)	(22:6)			C48 H80 O13 N0 P1	895.534	9.13891	0.0275232	1.03406	0.784216	0.047504	1.03373e+06	1.43265e+06	954775	866885	881942	737047	1.10848e+06	1.20454e+06	1.32979e+06	1.18309e+06	1.27016e+06	1.35172e+06	1.2995e+06	1.30105e+06	1.36324e+06
162POS		DG(18:3/18:2)+NH4	DG(36:5)+NH4	DG	(18:3/18:2)	(18:3)	(18:2)			C39 H70 O5 N1	632.525	10.6642	0.0106666	3.53321	0.00511864	0.902179	7.95542e+07	1.4246e+08	2.53168e+08	4.51757e+07	1.41277e+08	5.85359e+08	3.28053e+08	2.4268e+08	1.04347e+08	4.80543e+07	1.15671e+08	3.35289e+08	1.11337e+08	1.11331e+08	1.0929e+08
1630NEG		PI(19:1/20:4)-H	PI(39:5)-H	PI	(19:1/20:4)	(19:1)	(20:4)			C48 H82 O13 N0 P1	897.55	9.841	0.00547412	0.978514	0.901739	0.10963	5.86538e+06	6.92207e+06	2.85518e+06	2.48049e+06	4.01766e+06	3.61233e+06	5.36083e+06	5.47515e+06	5.32381e+06	6.01305e+06	6.40226e+06	5.23032e+06	5.7917e+06	5.84686e+06	5.84706e+06
1631NEG		PC(20:4/22:6)+HCOO	PC(42:10)+HCOO	PC	(20:4/22:6)	(20:4)	(22:6)			C51 H81 O10 N1 P1	898.56	8.63346	0.00968056	1.15092	0.0897583	0.251086	2.60424e+07	2.57547e+07	3.18133e+07	1.78323e+07	2.43951e+07	2.24713e+07	2.61569e+07	2.94758e+07	2.39747e+07	2.7483e+07	2.36425e+07	2.9336e+07	2.41699e+07	2.45857e+07	2.41867e+07
1632NEG		PI(19:0/20:4)-H	PI(39:4)-H	PI	(19:0/20:4)	(19:0)	(20:4)			C48 H84 O13 N0 P1	899.566	10.933	0.00825417	0.85037	0.221361	0.529497	5.96387e+07	4.21272e+07	3.70076e+07	3.51736e+07	3.3847e+07	3.14958e+07	4.42682e+07	4.4859e+07	5.04438e+07	6.1793e+07	5.3981e+07	5.09969e+07	5.07509e+07	5.14825e+07	5.14844e+07
1633NEG		PC(22:5/20:4)+HCOO	PC(42:9)+HCOO	PC	(22:5/20:4)	(22:5)	(20:4)			C51 H83 O10 N1 P1	900.576	9.32405	0.0247924	1.17736	0.11779	0.129626	6.56165e+06	6.79719e+06	8.87868e+06	4.70057e+06	6.46721e+06	5.47238e+06	6.73243e+06	6.12643e+06	5.95615e+06	6.10382e+06	4.54616e+06	6.4181e+06	6.23809e+06	5.97786e+06	5.97748e+06
1634NEG		PC(20:2/22:6)+HCOO	PC(42:8)+HCOO	PC	(20:2/22:6)	(20:2)	(22:6)			C51 H85 O10 N1 P1	902.592	10.134	0.00659643	1.04471	0.732936	0.139519	7.46735e+06	1.0462e+07	7.94273e+06	5.68109e+06	7.70886e+06	5.49048e+06	9.11642e+06	8.97669e+06	7.40634e+06	1.12215e+07	9.33634e+06	9.01576e+06	8.43133e+06	8.52872e+06	8.43271e+06
1635NEG		PC(20:1/22:6)+HCOO	PC(42:7)+HCOO	PC	(20:1/22:6)	(20:1)	(22:6)			C51 H87 O10 N1 P1	904.607	11.25	0.0240073	0.775306	0.106307	0.341726	1.06228e+07	1.3344e+07	9.54315e+06	1.1315e+07	9.13543e+06	6.53108e+06	8.21712e+06	7.69321e+06	1.13446e+07	1.70649e+07	1.05922e+07	9.00092e+06	9.62421e+06	1.00428e+07	1.00284e+07
1637NEG		PI(20:4/20:4)-H	PI(40:8)-H	PI	(20:4/20:4)	(20:4)	(20:4)			C49 H78 O13 N0 P1	905.519	7.88918	0.00731224	1.93624	0.0240551	0.265553	2.03121e+06	3.28313e+06	3.654e+06	1.51885e+06	2.21071e+06	1.83842e+06	5.70002e+06	7.00238e+06	2.32458e+06	3.09496e+06	2.05093e+06	4.14092e+06	3.41221e+06	3.45564e+06	3.41228e+06
1638NEG		PI(18:1/22:6)-H	PI(40:7)-H	PI	(18:1/22:6)	(18:1)	(22:6)			C49 H80 O13 N0 P1	907.534	8.89044	0.00821362	1.13827	0.412727	0.116073	3.38852e+06	5.38576e+06	3.2446e+06	3.06493e+06	2.85422e+06	2.04575e+06	4.82559e+06	4.54614e+06	3.25439e+06	4.72711e+06	4.21082e+06	4.425e+06	4.33307e+06	4.39605e+06	4.33518e+06
1639NEG		PC(22:1/20:4)+HCOO	PC(42:5)+HCOO	PC	(22:1/20:4)	(22:1)	(20:4)			C51 H91 O10 N1 P1	908.639	12.878	0.0160088	1.26965	0.108163	0.207687	4.59276e+06	1.0159e+07	6.30975e+06	5.37308e+06	5.3149e+06	5.16109e+06	7.39438e+06	6.24801e+06	4.62836e+06	6.15708e+06	5.71439e+06	5.07789e+06	5.33381e+06	5.48491e+06	5.48407e+06
1640NEG		PI(18:0/22:6)-H	PI(40:6)-H	PI	(18:0/22:6)	(18:0)	(22:6)			C49 H82 O13 N0 P1	909.55	10.03	0.0050626	1.18625	0.220718	0.459152	5.88722e+07	8.46519e+07	5.33112e+07	4.90107e+07	6.71805e+07	5.4e+07	7.91313e+07	6.48005e+07	5.77769e+07	6.93492e+07	6.94218e+07	1.04928e+08	7.01853e+07	7.08084e+07	7.08001e+07
1641NEG		PI(18:0/22:5)-H	PI(40:5)-H	PI	(18:0/22:5)	(18:0)	(22:5)			C49 H84 O13 N0 P1	911.566	10.3096	0.0246091	1.94513	0.000836174	0.933828	2.18232e+07	50862047	4.11202e+07	1.69469e+07	2.53795e+07	2.97046e+07	3.7411e+07	55781487	2.226e+07	2.31112e+07	2.94002e+07	5.53399e+07	3.48178e+07	3.63451e+07	3.63455e+07
1642NEG		PS(45:2)-H	PS(45:2)-H	PS	(45:2)	(45:2)				C51 H95 O10 N1 P1	912.67	14.1203	0.0471867	1.49277	0.166507	0.120175	1.278e+06	3.13009e+06	553250	265006	1.37544e+06	1.40573e+06	2.06814e+06	2.55328e+06	1.36567e+06	1.78627e+06	1.71523e+06	1.91165e+06	1.96515e+06	1.81211e+06	1.81357e+06
1643NEG		PI(18:0/22:4)-H	PI(40:4)-H	PI	(18:0/22:4)	(18:0)	(22:4)			C49 H86 O13 N0 P1	913.581	11.152	0.0135958	1.06349	0.673051	0.3583	3.81793e+07	5.24541e+07	2.70106e+07	3.40749e+07	5.33156e+07	3.08753e+07	6.00382e+07	4.5709e+07	3.83806e+07	3.82096e+07	4.8991e+07	5.10103e+07	4.87391e+07	4.87256e+07	4.75938e+07
1644NEG		PC(24:0/18:2)+HCOO	PC(42:2)+HCOO	PC	(24:0/18:2)	(24:0)	(18:2)			C51 H97 O10 N1 P1	914.686	16.17	0.0165333	1.45712	0.00559638	0.178745	1.86447e+06	2.89395e+06	3.18348e+06	1.75231e+06	1.65185e+06	3.68293e+06	2.86902e+06	2.35399e+06	1.8995e+06	2.36271e+06	2.21569e+06	2.13277e+06	2.16588e+06	2.22875e+06	2.16638e+06
1645NEG		PC(18:1/24:0)+HCOO	PC(42:1)+HCOO	PC	(18:1/24:0)	(18:1)	(24:0)			C51 H99 O10 N1 P1	916.701	17.287	0.0138919	2.4916	0.00858326	0.193951	495661	2.88923e+06	1.75325e+06	1.31002e+06	621858	1.23685e+06	2.85494e+06	1.54227e+06	470712	1.14912e+06	546814	1.17036e+06	1.22779e+06	1.25821e+06	1.22908e+06
1646NEG		PC(22:6/22:6)+HCOO	PC(44:12)+HCOO	PC	(22:6/22:6)	(22:6)	(22:6)			C53 H81 O10 N1 P1	922.56	8.32104	0.000464767	1.87414	0.000204371	0.339036	3.54705e+06	5.21962e+06	6.812e+06	2.79177e+06	3.38569e+06	4.81604e+06	5.73391e+06	6.53026e+06	3.01394e+06	3.90019e+06	3.18756e+06	8.0453e+06	4.60889e+06	4.60513e+06	4.60524e+06
1648NEG		Cer(d58:2+pO)+HCOO	Cer(d58:2+pO)+HCOO	Cer	(d58:2+pO)	(d58:2+pO)				C59 H114 O6 N1	932.865	23.163	0.164913	1.15242	0.3209	0.125696	2.60218e+06	2.89827e+06	4.15908e+06	2.88538e+06	3.74066e+06	4.77788e+06	2.65727e+06	2.3439e+06	2.79573e+06	2.60451e+06	2.72657e+06	3.16389e+06	2.52481e+06	2.58025e+06	1.8884e+06
1649NEG		PC(24:1/20:4)+HCOO	PC(44:5)+HCOO	PC	(24:1/20:4)	(24:1)	(20:4)			C53 H95 O10 N1 P1	936.67	14.243	0.0565356	1.77711	0.00031147	0.223714	1.49528e+06	3.72114e+06	2.90845e+06	1.2657e+06	1.38202e+06	3.07964e+06	3.24862e+06	2.763e+06	1.85822e+06	2.38969e+06	1.82516e+06	2.43427e+06	2.0094e+06	2.22061e+06	2.21919e+06
164POS		DG(18:1/18:3)+NH4	DG(36:4)+NH4	DG	(18:1/18:3)	(18:1)	(18:3)			C39 H72 O5 N1	634.541	11.6958	0.0170198	1.26973	0.192509	0.194711	2.78758e+08	3.08731e+08	5.37107e+08	2.33912e+08	4.85656e+08	293212271	4.63182e+08	5.77306e+08	3.33887e+08	2.41826e+08	4.49468e+08	3.89773e+08	2.41482e+08	2.35687e+08	2.33726e+08
1650NEG		PC(24:0/20:4)+HCOO	PC(44:4)+HCOO	PC	(24:0/20:4)	(24:0)	(20:4)			C53 H97 O10 N1 P1	938.686	15.854	0.0172751	1.88906	3.00256e-06	0.266447	1532987	3.74905e+06	3.28871e+06	1.43018e+06	1.85986e+06	3.90553e+06	3.23464e+06	3.48583e+06	1.87648e+06	2.2043e+06	2.12837e+06	3.17671e+06	2.60998e+06	2.68928e+06	2.61081e+06
1651NEG		SQDG(40:2)+HCOO	SQDG(40:2)+HCOO	SQDG	(40:2)	(40:2)				C50 H91 O14 S1	947.614	3.1646	0.0397159	1.16293	0.295082	0.103365	3.71019e+06	4.96805e+06	4.63233e+06	2.84074e+06	4.69318e+06	3.57236e+06	3.49346e+06	6.51408e+06	4.83708e+06	5.04236e+06	3.12096e+06	5.01445e+06	4.10623e+06	4.39522e+06	4.10602e+06
1652NEG		Cer(d60:3+hO)+HCOO	Cer(d60:3+hO)+HCOO	Cer	(d60:3+hO)	(d60:3+hO)				C61 H116 O6 N1	958.881	23.128	0.096309	1.87122	0.0617442	0.190876	847965	1.23047e+06	5.09435e+06	2.50632e+06	1.95851e+06	1.83266e+06	3.98866e+06	2.10347e+06	1.19749e+06	1.37673e+06	1.41555e+06	3.15755e+06	1.3641e+06	1.36639e+06	1.14951e+06
1654NEG		SQDG(41:2)+HCOO	SQDG(41:2)+HCOO	SQDG	(41:2)	(41:2)				C51 H93 O14 S1	961.629	4.50989	0.00732142	1.04772	0.766593	0.0646063	4.33921e+06	4.44313e+06	4.62497e+06	3.36065e+06	6.53001e+06	3.91107e+06	4.58128e+06	7.46682e+06	5.27235e+06	6.52691e+06	4.23149e+06	6.67743e+06	5.51618e+06	5.58652e+06	5.51637e+06
1655NEG		SQDG(43:5)+HCOO	SQDG(43:5)+HCOO	SQDG	(43:5)	(43:5)				C53 H91 O14 S1	983.614	4.52602	0.00928688	1.05015	0.749897	0.0799388	5.45382e+06	4.50175e+06	6.34769e+06	3.68823e+06	7.4377e+06	4.24097e+06	4.76165e+06	8.16488e+06	5.88479e+06	6.49176e+06	4.68784e+06	7.31457e+06	5.87094e+06	5.96483e+06	5.86889e+06
1656NEG		PE(54:5)-H	PE(54:5)-H	PE	(54:5)	(54:5)				C59 H107 O8 N1 P1	988.774	18.053	0.0132959	0.83332	0.569915	0.0342344	982205	879266	722413	595465	2.77016e+06	1.55572e+06	759975	1.73877e+06	1.0222e+06	920791	1.44517e+06	790417	1.29135e+06	1.32171e+06	1.3214e+06
1657NEG		SQDG(44:2)+HCOO	SQDG(44:2)+HCOO	SQDG	(44:2)	(44:2)				C54 H99 O14 S1	1003.68	4.48686	0.0839639	0.755808	0.142616	0.105753	1.61053e+06	604040	1.67036e+06	1.27163e+06	2.0889e+06	704464	976735	1.7987e+06	1.75458e+06	1.72215e+06	1.30894e+06	1.61991e+06	1.25535e+06	1.44812e+06	1.25692e+06
1658NEG		SQDG(46:8)+HCOO	SQDG(46:8)+HCOO	SQDG	(46:8)	(46:8)				C56 H91 O14 S1	1019.61	2.47018	0.0415992	1.15248	0.545822	0.0782198	1.20569e+06	1.32676e+06	2.2303e+06	689991	1.49503e+06	2.1994e+06	541791	900970	1.38842e+06	1.66723e+06	1.49211e+06	1.9497e+06	1.41346e+06	1.40519e+06	1.31041e+06
1659NEG		CerG2GNAc1(d32:1)-H	CerG2GNAc1(d32:1)-H	CerG2GNAc1	(d32:1)	(d32:1)				C52 H95 O18 N2	1035.66	3.27	0.0386028	0.97882	0.850503	0.0979579	1.25245e+07	1.32358e+07	1.56001e+07	1.18425e+07	1.80581e+07	1.29513e+07	1.04102e+07	1.92571e+07	1.68756e+07	1.63611e+07	1.3408e+07	1.57286e+07	1.2883e+07	1.37721e+07	1.28983e+07
165POS		Cer(d18:2/23:0)+H	Cer(d41:2)+H	Cer	(d18:2/23:0)	(d18:2)	(23:0)			C41 H80 O3 N1	634.613	13.7425	0.02152	2.63499	0.000538704	0.510346	4.54977e+07	1.79333e+08	1.52356e+08	2.52511e+07	7.34189e+07	7.52045e+07	1.16629e+08	1.61793e+08	4.69213e+07	4.59563e+07	7.51763e+07	1.37385e+08	4.56947e+07	4.57996e+07	4.40653e+07
1660NEG		SQDG(50:12)+HCOO	SQDG(50:12)+HCOO	SQDG	(50:12)	(50:12)				C60 H91 O14 S1	1067.61	2.35635	0.017409	2.27511	0.0143839	0.147314	569877	1.18139e+06	1.60678e+06	489101	780926	1.007e+06	236686	1.64337e+06	446463	288422	499317	1.31872e+06	764055	741265	764094
1661NEG		PIP2(20:4/22:6)-H	PIP2(42:10)-H	PIP2	(20:4/22:6)	(20:4)	(22:6)			C51 H80 O19 N0 P3	1089.45	7.38381	0.0304462	2.59243	4.62444e-05	0.26412	805242	3.55963e+06	2.55273e+06	609438	1.37375e+06	2.6462e+06	2.2785e+06	2.09605e+06	1.03145e+06	1.10259e+06	1.25401e+06	2.87899e+06	2.0649e+06	2.18499e+06	2.16868e+06
1662NEG		PIP2(42:9)-H	PIP2(42:9)-H	PIP2	(42:9)	(42:9)				C51 H82 O19 N0 P3	1091.47	8.21825	0.0430648	2.13238	0.00182607	0.2112	1.00763e+06	3.42523e+06	1.93282e+06	675992	1.44133e+06	1.76419e+06	2.13152e+06	1.8323e+06	1.10967e+06	899863	989129	1.97179e+06	1.81934e+06	1.821e+06	1.95939e+06
1663NEG		CerG2GNAc1(d36:1)-H	CerG2GNAc1(d36:1)-H	CerG2GNAc1	(d36:1)	(d36:1)				C56 H103 O18 N2	1091.72	4.265	0.0109505	0.798726	0.193635	0.168198	4.65012e+06	3.82697e+06	7.01981e+06	4.64055e+06	9.48725e+06	4.02268e+06	4.1226e+06	5.22676e+06	6.83775e+06	5.90348e+06	5.56452e+06	5.40085e+06	4.91265e+06	5.00748e+06	4.91476e+06
1664NEG		PIP(54:6)-H	PIP(54:6)-H	PIP	(54:6)	(54:6)				C63 H111 O16 N0 P2	1185.74	12.753	0.0477017	0.883466	0.490558	0.331362	2.42929e+07	1.21996e+07	1.04845e+07	2.82252e+07	2.76398e+07	2.75923e+07	2.37699e+07	3.7346e+07	2.72568e+07	2.69859e+07	2.24812e+07	2.72076e+07	2.88519e+07	2.8848e+07	3.13011e+07
1665NEG		PIP(54:5)-H	PIP(54:5)-H	PIP	(54:5)	(54:5)				C63 H113 O16 N0 P2	1187.75	13.687	0.0177642	1.48354	0.0622323	0.350306	8.95568e+06	1.02285e+07	7.58613e+06	7.14496e+06	1.00221e+07	1.44819e+07	1.15414e+07	1.92805e+07	1.25938e+07	6.23946e+06	9.98118e+06	1.83829e+07	1.01063e+07	1.04181e+07	1.01016e+07
1666NEG		GM3(d42:1)-H	GM3(d42:1)-H	GM3	(d42:1)	(d42:1)				C65 H119 O21 N2	1263.83	13.545	0.010062	0.93947	0.528694	0.132179	5.32023e+06	3.81621e+06	4.06078e+06	4.42263e+06	6.0125e+06	5.31952e+06	5.9018e+06	4.00045e+06	4.31896e+06	4.9473e+06	5.64628e+06	5.71279e+06	5.51918e+06	5.61591e+06	5.51914e+06
1667NEG		CL(18:2/16:1/16:1/18:2)-H	CL(68:6)-H	CL	(18:2/16:1/16:1/18:2)	(18:2)	(16:1)	(16:1)	(18:2)	C77 H137 O17 P2	1395.93	18.972	0.013423	1.1543	0.399579	0.162814	6.2596e+06	8.12632e+06	5.61992e+06	3.96615e+06	6.5066e+06	3.73846e+06	9.74241e+06	6.28532e+06	4.60582e+06	6.86231e+06	5.55695e+06	5.45383e+06	5.7427e+06	5.89858e+06	5.83121e+06
1668NEG		CL(16:1/16:1/18:2/18:1)-H	CL(68:5)-H	CL	(16:1/16:1/18:2/18:1)	(16:1)	(16:1)	(18:2)	(18:1)	C77 H139 O17 P2	1397.95	19.865	0.0213376	1.57601	0.0860518	0.214817	4.32924e+06	9.22754e+06	3.30337e+06	4.67899e+06	1.71919e+06	2.98603e+06	7.56578e+06	5.38424e+06	3.79144e+06	2.81396e+06	4.22314e+06	5.50554e+06	5.33999e+06	5.3386e+06	5.14437e+06
1669NEG		CL(18:2/16:0/16:1/18:1)-H	CL(68:4)-H	CL	(18:2/16:0/16:1/18:1)	(18:2)	(16:0)	(16:1)	(18:1)	C77 H141 O17 P2	1399.96	20.777	0.0905366	1.02297	0.941493	0.0724614	3.79052e+06	3.82011e+06	2.0904e+06	1.29766e+06	4.42644e+06	2.89681e+06	5.60918e+06	1.41214e+06	3.49758e+06	2.03541e+06	1.69816e+06	1.30177e+06	4.21641e+06	4.2077e+06	3.5844e+06
166POS		Cer(d18:2/23:0)+H	Cer(d41:2)+H	Cer	(d18:2/23:0)	(d18:2)	(23:0)			C41 H80 O3 N1	634.613	14.0208	0.0221419	2.02508	0.000638378	0.370186	5.21703e+07	9.74163e+07	1.02955e+08	2.95696e+07	6.55648e+07	6.71847e+07	8.72036e+07	1.01874e+08	3.94343e+07	2.92853e+07	6.77726e+07	1.18077e+08	3.33215e+07	3.21404e+07	3.20192e+07
1670NEG		CL(18:2/16:0/16:0/18:1)-H	CL(68:3)-H	CL	(18:2/16:0/16:0/18:1)	(18:2)	(16:0)	(16:0)	(18:1)	C77 H143 O17 P2	1401.98	21.358	0.0350534	0.981209	0.860896	0.0842054	3.9833e+06	4.88106e+06	3.75774e+06	4.60174e+06	2.7687e+06	2.59292e+06	4.48239e+06	3.83954e+06	3.9134e+06	4.01943e+06	4.41257e+06	3.70015e+06	3.2599e+06	3.45933e+06	3.25511e+06
1672NEG		CL(20:5/16:1/16:1/18:2)-H	CL(70:9)-H	CL	(20:5/16:1/16:1/18:2)	(20:5)	(16:1)	(16:1)	(18:2)	C79 H135 O17 P2	1417.92	18.99	0.00901082	1.28324	0.180603	0.100688	1.3361e+06	1.96441e+06	1.32015e+06	1.06395e+06	1.35949e+06	884321	2.44143e+06	1.38376e+06	1.19945e+06	1.02454e+06	1.21906e+06	1.24852e+06	1.4694e+06	1.46868e+06	1.44624e+06
1673NEG		CL(18:2/16:1/18:2/18:2)-H	CL(70:7)-H	CL	(18:2/16:1/18:2/18:2)	(18:2)	(16:1)	(18:2)	(18:2)	C79 H139 O17 P2	1421.95	19.0383	0.0111472	0.866556	0.132615	0.586617	6.18173e+07	4.00949e+07	5.64813e+07	5.73452e+07	6.12443e+07	3.88856e+07	6.81584e+07	5.28877e+07	5.87094e+07	6.79572e+07	5.94842e+07	6.11349e+07	5.99284e+07	5.98753e+07	5.87536e+07
1674NEG		CL(18:2/18:2/18:1/16:1)-H	CL(70:6)-H	CL	(18:2/18:2/18:1/16:1)	(18:2)	(18:2)	(18:1)	(16:1)	C79 H141 O17 P2	1423.96	19.9145	0.0152381	1.20214	0.161928	0.442947	3.24988e+07	3.96438e+07	3.45008e+07	2.65982e+07	3.20965e+07	2.06406e+07	4.91924e+07	3.54266e+07	2.66621e+07	2.87539e+07	3.00426e+07	3.29561e+07	3.25535e+07	3.34055e+07	3.3449e+07
1675NEG		CL(18:2/16:0/18:1/18:2)-H	CL(70:5)-H	CL	(18:2/16:0/18:1/18:2)	(18:2)	(16:0)	(18:1)	(18:2)	C79 H143 O17 P2	1425.98	20.7222	0.0285253	1.25453	0.172085	0.348889	1.66776e+07	2.98257e+07	2.0138e+07	1.52158e+07	1.82748e+07	1.45022e+07	3.01498e+07	1.82416e+07	1.48117e+07	1.56752e+07	2.42566e+07	1.87573e+07	2.0311e+07	2.03274e+07	1.93316e+07
1676NEG		CL(18:2/18:1/16:0/18:1)-H	CL(70:4)-H	CL	(18:2/18:1/16:0/18:1)	(18:2)	(18:1)	(16:0)	(18:1)	C79 H145 O17 P2	1428	21.379	0.0261403	1.31032	0.13182	0.34632	6.28561e+06	1.4322e+07	1.575e+07	8.3495e+06	1.30484e+07	7.12102e+06	1.71605e+07	1.64405e+07	1.11131e+07	9.57937e+06	1.45757e+07	1.16928e+07	1.39357e+07	1.33188e+07	1.33278e+07
1677NEG		CL(17:1/18:2/18:2/18:2)-H	CL(71:7)-H	CL	(17:1/18:2/18:2/18:2)	(17:1)	(18:2)	(18:2)	(18:2)	C80 H141 O17 P2	1435.96	19.582	0.0286423	0.809197	0.0478381	0.145008	2.3715e+06	2.06043e+06	1.81545e+06	2.09193e+06	2.88516e+06	1.6701e+06	2.69723e+06	2.5499e+06	2.61398e+06	3.11857e+06	2.78669e+06	2.04708e+06	2.35633e+06	2.35676e+06	2.24154e+06
1678NEG		CL(17:1/18:2/18:1/18:2)-H	CL(71:6)-H	CL	(17:1/18:2/18:1/18:2)	(17:1)	(18:2)	(18:1)	(18:2)	C80 H143 O17 P2	1437.98	20.371	0.0562433	1.81804	0.0292373	0.175604	1.31188e+06	2.86049e+06	1.57418e+06	831489	1.21581e+06	662294	2.25293e+06	2.36739e+06	1.19799e+06	982140	668897	1.56949e+06	1.31796e+06	1.45623e+06	1.45429e+06
1679NEG		CL(18:2/16:1/22:6/16:1)-H	CL(72:10)-H	CL	(18:2/16:1/22:6/16:1)	(18:2)	(16:1)	(22:6)	(16:1)	C81 H137 O17 P2	1443.93	19.044	0.00287107	1.01616	0.864696	0.171029	1.25047e+07	1.06956e+07	1.16895e+07	9.66382e+06	1.1494e+07	7.82117e+06	1.46973e+07	1.00678e+07	1.08407e+07	1.11195e+07	1.0242e+07	1.19578e+07	1.12361e+07	1.12919e+07	1.12357e+07
1680NEG		CL(18:3/18:2/18:2/18:2)-H	CL(72:9)-H	CL	(18:3/18:2/18:2/18:2)	(18:3)	(18:2)	(18:2)	(18:2)	C81 H139 O17 P2	1445.95	19.047	0.0140404	1.05301	0.697974	0.102963	6.44961e+06	4.78811e+06	7.24516e+06	4.72958e+06	6.78252e+06	4.77527e+06	9.06606e+06	5.08199e+06	5.90306e+06	7.02537e+06	5.50773e+06	7.37068e+06	5.88089e+06	5.88001e+06	5.7386e+06
1681NEG		CL(20:5/16:1/18:1/18:2)-H	CL(72:9)-H	CL	(20:5/16:1/18:1/18:2)	(20:5)	(16:1)	(18:1)	(18:2)	C81 H139 O17 P2	1445.95	18.112	0.0327728	0.568525	0.00695656	0.424628	8.78045e+06	3.68935e+06	4.05851e+06	1.01256e+07	1.5446e+07	7.88058e+06	7.65693e+06	7.34275e+06	1.06076e+07	8.75365e+06	1.45642e+07	8.18931e+06	9.92493e+06	1.04996e+07	9.92579e+06
1683NEG		CL(18:2/18:2/18:2/18:2)-H	CL(72:8)-H	CL	(18:2/18:2/18:2/18:2)	(18:2)	(18:2)	(18:2)	(18:2)	C81 H141 O17 P2	1447.96	20.755	0.143967	1.14735	0.638925	0.0855775	3.21747e+06	4.34189e+06	5.14267e+06	6.91232e+06	3.99646e+06	2.05067e+06	5.07697e+06	1.10721e+07	6.34897e+06	8.43055e+06	4.57098e+06	1.07253e+07	5.14666e+06	6.48776e+06	5.05814e+06
1684NEG		CL(18:2/18:2/18:2/18:1)-H	CL(72:7)-H	CL	(18:2/18:2/18:2/18:1)	(18:2)	(18:2)	(18:2)	(18:1)	C81 H143 O17 P2	1449.98	19.9814	0.0104192	0.850763	0.122407	1.07493	2.12102e+08	1.27266e+08	2.09229e+08	2.15909e+08	2.7664e+08	1.55031e+08	2.33264e+08	2.07329e+08	2.06017e+08	2.22689e+08	2.03411e+08	2.05154e+08	2.07403e+08	211117648	2.07305e+08
1685NEG		CL(18:2/18:2/18:2/18:1)-H	CL(72:7)-H	CL	(18:2/18:2/18:2/18:1)	(18:2)	(18:2)	(18:2)	(18:1)	C81 H143 O17 P2	1449.98	21.366	0.0370663	0.78986	0.492681	0.187265	6.03759e+06	2.40866e+06	3.34169e+06	2.44792e+06	8.78146e+06	913283	4.99985e+06	4.39302e+06	2.10931e+06	2.06475e+06	4.18783e+06	4.18669e+06	3.43754e+06	3.35884e+06	3.19551e+06
1686NEG		CL(18:2/18:1/18:2/18:1)-H	CL(72:6)-H	CL	(18:2/18:1/18:2/18:1)	(18:2)	(18:1)	(18:2)	(18:1)	C81 H145 O17 P2	1452	20.7831	0.0124072	1.06423	0.619632	0.495031	6.35527e+07	7.97865e+07	7.77805e+07	6.74646e+07	9.77533e+07	4.85913e+07	9.96468e+07	8.89981e+07	6.2932e+07	6.62824e+07	7.55402e+07	6.65691e+07	7.89958e+07	7.8936e+07	7.72818e+07
1687NEG		CL(19:1/18:2/18:2/18:2)-H	CL(73:7)-H	CL	(19:1/18:2/18:2/18:2)	(19:1)	(18:2)	(18:2)	(18:2)	C82 H145 O17 P2	1464	20.538	0.0160191	1.12578	0.349068	0.0637711	1.00575e+06	1.5302e+06	1.7479e+06	1.20453e+06	1.68077e+06	1.29237e+06	1.63575e+06	2.2964e+06	1.66573e+06	1.67258e+06	1.55798e+06	1.38999e+06	1.55611e+06	1.60416e+06	1.59435e+06
1688NEG		CL(20:5/18:2/20:4/16:1)-H	CL(74:12)-H	CL	(20:5/18:2/20:4/16:1)	(20:5)	(18:2)	(20:4)	(16:1)	C83 H137 O17 P2	1467.93	18.439	0.0572413	0.521897	0.0214166	0.22644	2.4868e+06	357531	683192	2.66604e+06	3.1893e+06	2.06151e+06	1.98515e+06	3.03128e+06	2.35373e+06	4.28069e+06	4.7118e+06	2.15663e+06	2.14405e+06	2.13836e+06	1.93577e+06
168POS		Cer(d18:1/23:0)+H	Cer(d41:1)+H	Cer	(d18:1/23:0)	(d18:1)	(23:0)			C41 H82 O3 N1	636.629	14.8263	0.016896	1.35739	0.0848229	0.0460702	2.94184e+07	3.71004e+07	4.07889e+07	1.68519e+07	2.12638e+07	2.32596e+07	2.60182e+07	3.79025e+07	3.07202e+07	2.76023e+07	3.39241e+07	5.18143e+07	17702045	1.77213e+07	1.71986e+07
1690NEG		CL(18:2/18:2/20:4/18:2)-H	CL(74:10)-H	CL	(18:2/18:2/20:4/18:2)	(18:2)	(18:2)	(20:4)	(18:2)	C83 H141 O17 P2	1471.96	20.069	0.0148485	0.875822	0.147336	0.547979	5.61228e+07	3.94557e+07	4.8774e+07	5.05083e+07	6.90182e+07	4.19239e+07	6.42014e+07	5.31047e+07	5.28791e+07	5.89461e+07	5.80563e+07	5.51638e+07	5.50496e+07	5.50249e+07	5.3634e+07
1691NEG		CL(18:2/18:1/20:4/18:2)-H	CL(74:9)-H	CL	(18:2/18:1/20:4/18:2)	(18:2)	(18:1)	(20:4)	(18:2)	C83 H143 O17 P2	1473.98	20.802	0.044403	0.90196	0.611615	0.21189	2.14155e+07	2.40855e+07	2.54691e+07	2.17793e+07	3.50516e+07	1.29641e+07	2.33204e+07	9.0974e+06	1.61069e+07	1.45566e+07	2.3984e+07	2.49285e+07	2.73985e+07	2.7396e+07	2.53428e+07
1692NEG		CL(18:2/18:2/18:2/20:3)-H	CL(74:9)-H	CL	(18:2/18:2/18:2/20:3)	(18:2)	(18:2)	(18:2)	(20:3)	C83 H143 O17 P2	1473.98	19.4268	0.0178584	0.643891	0.00253233	0.775361	4.18174e+07	1.6111e+07	1.99977e+07	3.22259e+07	3.71247e+07	2.2292e+07	2.63193e+07	2.16777e+07	2.99791e+07	4.27175e+07	3.0925e+07	3.19035e+07	3.13265e+07	3.13035e+07	3.03564e+07
1693NEG		CL(20:2/18:2/18:2/18:2)-H	CL(74:8)-H	CL	(20:2/18:2/18:2/18:2)	(20:2)	(18:2)	(18:2)	(18:2)	C83 H145 O17 P2	1476	20.1746	0.0136784	0.750656	0.00525634	0.724073	4.12408e+07	3.08855e+07	4.16101e+07	5.15515e+07	6.06159e+07	3.61559e+07	4.22886e+07	4.39447e+07	4.55026e+07	5.6516e+07	5.77511e+07	4.02039e+07	4.77713e+07	4.77507e+07	4.66385e+07
1694NEG		CL(20:2/18:2/18:2/18:1)-H	CL(74:7)-H	CL	(20:2/18:2/18:2/18:1)	(20:2)	(18:2)	(18:2)	(18:1)	C83 H147 O17 P2	1478.01	20.8723	0.0344676	1.01743	0.872123	0.0929786	1.57908e+07	1.66299e+07	2.46239e+07	1.91369e+07	2.31471e+07	1.6516e+07	1.848e+07	2.61214e+07	1.82592e+07	2.42922e+07	2.20652e+07	2.24587e+07	2.01213e+07	2.13368e+07	2.01024e+07
1695NEG		CL(20:5/20:4/18:2/18:2)-H	CL(76:13)-H	CL	(20:5/20:4/18:2/18:2)	(20:5)	(20:4)	(18:2)	(18:2)	C85 H139 O17 P2	1493.95	19.004	0.04504	0.708945	0.000367374	0.203447	2.68438e+06	1.81147e+06	1.87159e+06	2.75712e+06	3.24192e+06	2.34639e+06	2.04827e+06	2.207e+06	2.51733e+06	3.31035e+06	3.18133e+06	2.25824e+06	2.79059e+06	2.79059e+06	2.57841e+06
1696NEG		CL(20:5/18:2/18:2/20:3)-H	CL(76:12)-H	CL	(20:5/18:2/18:2/20:3)	(20:5)	(18:2)	(18:2)	(20:3)	C85 H141 O17 P2	1495.96	19.48	0.0214508	0.668025	0.00507933	0.366449	1.06746e+07	4.317e+06	5.65119e+06	9.01644e+06	1.02535e+07	5.54899e+06	6.13829e+06	5.87242e+06	6.93574e+06	9.61069e+06	7.3555e+06	8.44285e+06	7.67228e+06	7.65397e+06	7.38233e+06
1697NEG		CL(18:2/18:2/22:5/18:2)-H	CL(76:11)-H	CL	(18:2/18:2/22:5/18:2)	(18:2)	(18:2)	(22:5)	(18:2)	C85 H143 O17 P2	1497.98	18.412	0.0125076	0.558127	0.00022284	0.288759	3.61163e+06	1.57151e+06	2.2124e+06	4.91021e+06	4.7542e+06	2.81362e+06	2.39989e+06	2.90946e+06	3.44219e+06	4.7591e+06	3.87169e+06	2.2411e+06	3.44527e+06	3.47781e+06	3.39259e+06
1698NEG		CL(18:2/18:2/22:5/18:2)-H	CL(76:11)-H	CL	(18:2/18:2/22:5/18:2)	(18:2)	(18:2)	(22:5)	(18:2)	C85 H143 O17 P2	1497.98	20.186	0.0170588	0.844388	0.139521	0.228457	9.51335e+06	7.94029e+06	8.75921e+06	9.93354e+06	1.36976e+07	8.54651e+06	1.05725e+07	1.30139e+07	1.04411e+07	1.27775e+07	1.42547e+07	1.07964e+07	1.00502e+07	1.03468e+07	1.00438e+07
1699NEG		CL(18:2/18:2/22:5/18:2)-H	CL(76:11)-H	CL	(18:2/18:2/22:5/18:2)	(18:2)	(18:2)	(22:5)	(18:2)	C85 H143 O17 P2	1497.98	18.719	0.0218676	1.19695	0.254291	0.10219	2.75974e+06	2.56511e+06	3.24248e+06	2.85286e+06	2.80895e+06	2.13062e+06	2.80869e+06	4.62119e+06	2.21233e+06	2.76932e+06	3.27573e+06	4.59574e+06	3.28446e+06	3.28514e+06	3.4108e+06
169POS		Cer(d18:1/23:0)+H	Cer(d41:1)+H	Cer	(d18:1/23:0)	(d18:1)	(23:0)			C41 H82 O3 N1	636.629	15.0847	0.018512	1.57518	0.00354819	0.597372	3.52313e+08	4.74608e+08	6.00342e+08	2.5808e+08	3.94899e+08	3.96647e+08	4.44061e+08	5.60967e+08	2.98251e+08	2.61388e+08	4.2735e+08	6.61576e+08	2.57694e+08	249994063	2.49263e+08
16POS		WE(25:1)+NH4	WE(25:1)+NH4	WE	(25:1)	(25:1)				H52 C25 O2 N1	398.399	5.81466	0.0380275	1.80824	0.131656	0.0177767	373899	661122	1.84574e+06	403550	971775	406194	1.08675e+06	731580	528899	1.13089e+06	340649	2.04889e+06	490781	523084	489420
1700NEG		CL(18:2/18:1/22:6/18:1)-H	CL(76:10)-H	CL	(18:2/18:1/22:6/18:1)	(18:2)	(18:1)	(22:6)	(18:1)	C85 H145 O17 P2	1500	20.873	0.0370551	1.18667	0.382514	0.131957	3.35351e+06	5.64129e+06	7.21988e+06	5.78465e+06	6.90204e+06	3.03121e+06	8.59173e+06	4.95117e+06	3.15043e+06	6.42046e+06	5.89617e+06	7.95343e+06	5.11585e+06	5.45308e+06	5.46436e+06
1701NEG		CL(18:2/18:1/20:1/20:4)-H	CL(76:8)-H	CL	(18:2/18:1/20:1/20:4)	(18:2)	(18:1)	(20:1)	(20:4)	C85 H149 O17 P2	1504.03	10.5392	0.0179053	0.846384	0.112166	0.459891	3.73104e+07	3.35958e+07	1.81344e+07	2.39627e+07	3.23825e+07	2.45509e+07	2.68894e+07	2.69463e+07	2.99064e+07	3.35258e+07	3.10714e+07	2.91381e+07	2.78933e+07	2.87796e+07	2.87735e+07
1702NEG		CL(20:5/22:6/18:2/18:2)-H	CL(78:15)-H	CL	(20:5/22:6/18:2/18:2)	(20:5)	(22:6)	(18:2)	(18:2)	C87 H139 O17 P2	1517.95	18.653	0.00480392	0.59158	0.000787006	0.214378	2.26949e+06	1.19832e+06	1.11401e+06	2.95563e+06	3.0633e+06	1.60506e+06	1.51153e+06	2.0229e+06	2.06932e+06	2.88554e+06	2.27877e+06	1.73071e+06	2.18865e+06	2.19669e+06	2.17585e+06
1703NEG		CL(23:1/16:0/16:0/22:6)-H	CL(77:7)-H	CL	(23:1/16:0/16:0/22:6)	(23:1)	(16:0)	(16:0)	(22:6)	C86 H153 O17 P2	1520.06	10.529	0.0335572	1.22751	0.198334	0.152767	3.60728e+06	6.119e+06	6.48401e+06	4.95536e+06	7.20233e+06	7.64936e+06	6.53585e+06	7.61635e+06	6.48286e+06	8.86084e+06	5.60056e+06	1.06562e+07	6.60654e+06	6.23201e+06	6.24193e+06
1704NEG		CL(22:6/18:1/20:0/22:6)-H	CL(82:13)-H	CL	(22:6/18:1/20:0/22:6)	(22:6)	(18:1)	(20:0)	(22:6)	C91 H151 O17 P2	1578.04	10.481	0.0140477	0.638982	0.036374	0.29599	8.40897e+06	5.17747e+06	5.23441e+06	3.00604e+06	6.82728e+06	4.11412e+06	3.00495e+06	2.29268e+06	7.67791e+06	8.23618e+06	6.12989e+06	5.91858e+06	4.94802e+06	5.0695e+06	4.94822e+06
1705NEG		CL(23:0/18:0/20:4/22:4)-H	CL(83:8)-H	CL	(23:0/18:0/20:4/22:4)	(23:0)	(18:0)	(20:4)	(22:4)	C92 H163 O17 P2	1602.14	11.27	0.0118571	0.938432	0.531544	0.248976	2.8254e+07	1.85321e+07	2.85956e+07	2.57482e+07	3.93236e+07	2.96029e+07	2.75836e+07	2.84509e+07	2.76484e+07	27521964	2.64575e+07	3.14171e+07	2.6953e+07	2.75994e+07	2.73007e+07
170POS		DG(18:0/18:2)+NH4	DG(36:2)+NH4	DG	(18:0/18:2)	(18:0)	(18:2)			C39 H76 O5 N1	638.572	13.1423	0.0213511	1.95232	0.0210646	0.626096	1.18633e+08	1.21349e+08	4.7743e+08	1.01397e+08	2.87243e+08	318123024	3.18125e+08	3.64722e+08	1.17768e+08	1.23382e+08	2.2088e+08	2.92641e+08	1.22561e+08	1.18371e+08	1.17935e+08
171POS		Cer(d18:1/22:0+O)+H	Cer(d40:1+O)+H	Cer	(d18:1/22:0+O)	(d18:1)	(22:0+O)			C40 H80 O4 N1	638.608	13.18	0.0787773	1.92585	0.272576	0.175947	3.45058e+06	4.36172e+06	5.17055e+06	1.36154e+07	3.00918e+07	4.37225e+07	2.6809e+07	3.72082e+07	3.28612e+06	1.07572e+07	2.43377e+06	5.27901e+06	2.6093e+06	2.2726e+06	2.61795e+06
172POS		Cer(d18:0/23:0)+H	Cer(d41:0)+H	Cer	(d18:0/23:0)	(d18:0)	(23:0)			C41 H84 O3 N1	638.645	15.5371	0.0207409	1.06875	0.53165	0.0966097	1.25326e+07	1.34314e+07	2.06127e+07	1.28895e+07	1.90352e+07	1.57575e+07	1.39639e+07	1.8531e+07	1.60463e+07	1.73725e+07	1.29541e+07	1.47777e+07	1.02301e+07	9.87552e+06	9.86703e+06
173POS		DG(38:7)+H	DG(38:7)+H	DG	(38:7)	(38:7)				C41 H67 O5	639.498	11.3675	0.0338536	1.94055	0.0330681	0.343169	4.73747e+07	3.77292e+07	4.83662e+07	3.32255e+07	3.60631e+07	1.30555e+08	6.67264e+07	6.26829e+07	4.36412e+07	2.33765e+07	3.19825e+07	7.24462e+07	70961000	6.76251e+07	7.22312e+07
174POS		DG(18:0/18:1)+NH4	DG(36:1)+NH4	DG	(18:0/18:1)	(18:0)	(18:1)			C39 H78 O5 N1	640.587	14.0584	0.0204873	2.28953	0.00191225	0.288083	1.86488e+07	2.2768e+07	6.24576e+07	1.67241e+07	3.33247e+07	5.81498e+07	4.11691e+07	4.98534e+07	1.72195e+07	1.60364e+07	2.11175e+07	4.73764e+07	1.86159e+07	1.80147e+07	1.7934e+07
175POS		Cer(d18:0+pO/22:0)+H	Cer(d40:0+pO)+H	Cer	(d18:0+pO/22:0)	(d18:0+pO)	(22:0)			C40 H82 O4 N1	640.624	13.7131	0.0176059	1.7721	0.00448823	0.113757	7.40996e+06	2.13871e+07	1.45326e+07	7.3111e+06	9.60182e+06	9.50206e+06	1.44049e+07	1.35098e+07	6.42725e+06	7.36991e+06	1.05547e+07	1.29201e+07	6.74779e+06	6.66488e+06	6.51691e+06
176POS		Cer(d42:5)+H	Cer(d42:5)+H	Cer	(d42:5)	(d42:5)				C42 H76 O3 N1	642.582	13.344	0.00553659	1.07202	0.28492	0.329378	1.89922e+08	2.2302e+08	1.91535e+08	1.6017e+08	1.81885e+08	1.94875e+08	1.96699e+08	1.96036e+08	1.55487e+08	1.8776e+08	2.20745e+08	1.72733e+08	1.03426e+08	1.02443e+08	1.03437e+08
177POS		DG(38:5)+H	DG(38:5)+H	DG	(38:5)	(38:5)				C41 H71 O5	643.53	12.9092	0.0289286	1.77844	0.00700128	0.976398	5.53956e+08	7.4129e+08	9.18555e+08	3.91864e+08	4.86953e+08	1076327038	1365147573	8.01339e+08	4.37378e+08	4.39275e+08	9.47577e+08	8.89739e+08	3.33432e+08	3.17303e+08	3.17227e+08
178POS		DG(18:1/20:4)+H	DG(38:5)+H	DG	(18:1/20:4)	(18:1)	(20:4)			C41 H71 O5	643.53	11.7282	0.0251525	2.21706	0.00203732	0.370225	3.1633e+07	4.31634e+07	8.60811e+07	2.28453e+07	4.96414e+07	1.11637e+08	6.31647e+07	7.3856e+07	3.38727e+07	2.81316e+07	4.07389e+07	8.07247e+07	3.61957e+07	3.63466e+07	3.4719e+07
179POS		Cer(d18:2/24:2)+H	Cer(d42:4)+H	Cer	(d18:2/24:2)	(d18:2)	(24:2)			C42 H78 O3 N1	644.598	12.2281	0.052925	2.81968	0.0123672	0.312274	1.53407e+07	8.8838e+07	4.34604e+07	9.6752e+06	3.86279e+07	4.37968e+07	9.35282e+07	4.71499e+07	1.33682e+07	1.31722e+07	3.16447e+07	2.67455e+07	9.87167e+06	9.87392e+06	8.9946e+06
17POS		AcCa(16:0)+H	AcCa(16:0)+H	AcCa	(16:0)	(16:0)				C23 H46 O4 N1	400.342	2.90223	0.0164574	1.29702	0.376366	0.206443	1.44394e+08	1.27306e+08	1.57049e+08	4.74503e+07	2.20599e+08	6.29443e+07	2.36626e+08	1.36727e+08	5.214e+07	7.03558e+07	1.35358e+08	1.48741e+08	7.69584e+07	7.69288e+07	7.47711e+07
180POS		DG(38:4)+H	DG(38:4)+H	DG	(18:0/20:4)	(18:0)	(20:4)			C41 H73 O5	645.545	14.0719	0.0131834	4.39862	0.000577392	0.585189	2.755e+07	8.4275e+07	1.69873e+08	2.60123e+07	3.38813e+07	1.88236e+08	1.01575e+08	1.40641e+08	2.21262e+07	1.82711e+07	4.42993e+07	7.2579e+07	6.42364e+07	6.26288e+07	6.30437e+07
181POS		Cer(d42:3)+H	Cer(d42:3)+H	Cer	(d42:3)	(d42:3)				C42 H80 O3 N1	646.613	14.8766	0.0307189	0.587638	0.0398059	0.34876	3.31441e+07	3.54412e+07	3.54034e+07	6.17331e+07	6.29954e+07	5.27045e+07	2.20173e+07	3.11415e+07	4.34705e+07	8.64804e+07	4.02544e+07	1.60832e+07	1.74138e+07	1.64912e+07	1.73876e+07
184POS		Cer(d18:1/24:1)+H	Cer(d42:2)+H	Cer	(d18:1/24:1)	(d18:1)	(24:1)			C42 H82 O3 N1	648.629	14.5078	0.0194354	2.2396	0.000616226	0.705017	1.31891e+08	3.76953e+08	3.19538e+08	8.74086e+07	1.8717e+08	1.78395e+08	3.4932e+08	3.85429e+08	1.27999e+08	1.29194e+08	1.74681e+08	2.67915e+08	1.30575e+08	1.29268e+08	125745067
185POS		DG(19:1/18:2)+NH4	DG(37:3)+NH4	DG	(19:1/18:2)	(19:1)	(18:2)			C40 H76 O5 N1	650.572	12.5282	0.0325969	2.76138	0.000121849	0.160971	4.31765e+06	8.36447e+06	1.52823e+07	2.33057e+06	5.71364e+06	1.31688e+07	1.01619e+07	1.24945e+07	4.8413e+06	3.4661e+06	6.52827e+06	1.56306e+07	4.62062e+06	4.63604e+06	4.37219e+06
186POS		Cer(d18:1/24:0)+H	Cer(d42:1)+H	Cer	(d18:1/24:0)	(d18:1)	(24:0)			C42 H84 O3 N1	650.645	15.7159	0.0214221	1.48563	0.00573453	0.92672	7.26064e+08	1358054688	1656929972	7.45342e+08	1230489421	1060122710	1473719819	1359298044	727482052	8.98024e+08	1250400572	1378420571	7.41484e+08	743644859	7.15412e+08
187POS		Cer(d18:0/24:1)+H	Cer(d42:1)+H	Cer	(d18:0/24:1)	(d18:0)	(24:1)			C42 H84 O3 N1	650.645	14.7739	0.0155317	1.64547	0.0244723	0.441979	8.83714e+07	2.21665e+08	2.96269e+08	8.26193e+07	2.52148e+08	1.7783e+08	2.14223e+08	2.32627e+08	1.18935e+08	1.3345e+08	1.14369e+08	1.57128e+08	9.20254e+07	9.21544e+07	8.9637e+07
188POS		Cer(d18:0/24:0)+H	Cer(d42:0)+H	Cer	(d18:0/24:0)	(d18:0)	(24:0)			C42 H86 O3 N1	652.66	16.2072	0.0181128	0.896154	0.456351	0.224804	2.80136e+07	3.459e+07	5.35646e+07	4.46722e+07	6.77548e+07	4.47552e+07	4.63107e+07	4.34609e+07	4.45374e+07	5.81524e+07	4.29083e+07	3.36532e+07	2.74009e+07	2.65856e+07	2.65345e+07
189POS		Cer(d18:0+pO/23:0)+H	Cer(d41:0+pO)+H	Cer	(d18:0+pO/23:0)	(d18:0+pO)	(23:0)			C41 H84 O4 N1	654.639	14.3225	0.0267639	1.92945	0.00170525	0.0845257	4.16659e+06	1.01428e+07	7.51194e+06	3.10952e+06	3.15701e+06	5.91287e+06	5.4873e+06	6.28747e+06	3.95938e+06	3.04887e+06	5.44174e+06	8.80934e+06	3.49266e+06	3.33658e+06	3.33464e+06
18POS		AcCa(18:3)+H	AcCa(18:3)+H	AcCa	(18:3)	(18:3)				C25 H44 O4 N1	422.326	2.174	0.0329319	1.16592	0.724332	0.0401096	6.08239e+06	5.99924e+06	7.6399e+06	2.97784e+06	1.68717e+07	3.44766e+06	1.29437e+07	4.44038e+06	2.75309e+06	3.32162e+06	1.37616e+07	1.88914e+07	3.41369e+06	3.40279e+06	3.21769e+06
190POS		DG(18:3/20:4)+NH4	DG(38:7)+NH4	DG	(18:3/20:4)	(18:3)	(20:4)			C41 H70 O5 N1	656.525	10.5414	0.220376	2.78292	0.0108872	0.698313	7.67581e+07	117071772	2.2133e+08	4.59434e+07	1.4078e+08	4.10639e+08	2.21754e+08	185092842	9.11998e+07	3.28843e+07	8.21234e+07	1.51217e+08	8.48194e+07	1.21275e+08	8.3942e+07
191POS		DG(18:3/20:4)+NH4	DG(38:7)+NH4	DG	(18:3/20:4)	(18:3)	(20:4)			C41 H70 O5 N1	656.525	10.2331	0.00951582	2.741	0.12566	0.589987	3.68399e+07	4.6707e+07	8.99112e+07	3.37188e+07	6.75142e+07	3.45848e+08	8.72552e+07	5.39087e+07	5.03189e+07	2.03054e+07	5.80615e+07	1.07554e+08	5.14471e+07	5.0625e+07	5.05927e+07
192POS		TG(4:0/16:0/16:0)+NH4	TG(36:0)+NH4	TG	(4:0/16:0/16:0)	(4:0)	(16:0)	(16:0)		C39 H78 O6 N1	656.582	14.7596	0.0181555	6.64758	0.315681	0.153937	2.25916e+06	3.80109e+06	2.85217e+06	4.251e+06	3.44371e+06	3.35501e+06	3.67068e+06	3.09915e+06	1.0705e+06	1.93433e+06	2.47771e+06	8.58367e+07	1.20915e+07	1.17179e+07	1.17202e+07
193POS		DG(18:2/20:4)+NH4	DG(38:6)+NH4	DG	(18:2/20:4)	(18:2)	(20:4)			C41 H72 O5 N1	658.541	10.9058	0.029348	2.42658	0.0564195	1.10467	1.68759e+08	2.18878e+08	5.60778e+08	1.52177e+08	2.9697e+08	1167676859	3.55616e+08	3.49312e+08	2.30359e+08	1.63207e+08	2.62978e+08	4.40292e+08	2.28596e+08	2.34119e+08	2.20809e+08
195POS		Cer(d43:4)+H	Cer(d43:4)+H	Cer	(d43:4)	(d43:4)				C43 H80 O3 N1	658.613	15.0319	0.0116586	0.977741	0.710841	0.79127	6.18798e+08	6.94013e+08	6.73828e+08	621373684	6.66771e+08	709234817	4.82357e+08	6.63574e+08	6.1381e+08	6.90297e+08	6.88731e+08	5.89973e+08	4.10508e+08	4.02345e+08	4.10651e+08
196POS		Co(Q7)+H	Co(Q7)+H	Co	(Q7)	(Q7)				C44 H67 O4	659.503	15.9007	0.0294527	1.41373	0.0392321	0.151643	3.49022e+07	4.33436e+07	5.97282e+07	2.58915e+07	5.77197e+07	4.24561e+07	4.58443e+07	5.94127e+07	2.9604e+07	2.38936e+07	4.59517e+07	5.73548e+07	1.90625e+07	1.81595e+07	1.80884e+07
197POS		DG(18:0/20:5)+NH4	DG(38:5)+NH4	DG	(18:0/20:5)	(18:0)	(20:5)			C41 H74 O5 N1	660.556	12.0077	0.031472	2.18021	0.00602598	0.362816	4.18756e+07	5.1166e+07	8.19508e+07	2.41759e+07	5.17893e+07	1.24709e+08	6.64006e+07	1.00565e+08	4.22116e+07	2.25644e+07	3.77123e+07	5.55737e+07	3.89546e+07	3.90861e+07	3.69343e+07
199POS		Cer(d18:2/25:1)+H	Cer(d43:3)+H	Cer	(d18:2/25:1)	(d18:2)	(25:1)			C43 H82 O3 N1	660.629	13.815	0.0224606	2.93237	8.03387e-05	0.144766	2.84763e+06	1.08297e+07	1.11626e+07	2.29304e+06	5.22093e+06	6.09739e+06	8.7072e+06	1.16366e+07	2.72366e+06	2.1996e+06	4.22796e+06	8.78534e+06	3.00394e+06	3.0077e+06	2.89042e+06
19POS		AcCa(18:1)+H	AcCa(18:1)+H	AcCa	(18:1)	(18:1)				C25 H48 O4 N1	426.358	3.04167	0.00980652	0.843637	0.569753	0.464072	3.4314e+08	1.75079e+08	1.87028e+08	1.13729e+08	3.72766e+08	6.6187e+07	3.57644e+08	1.39452e+08	131493056	1.63836e+08	3.12789e+08	2.87552e+08	1.27646e+08	1.27661e+08	125497500
1POS		So(d16:1)+H	So(d16:1)+H	So	(d16:1)	(d16:1)				C16 H34 O2 N1	272.258	1.97812	0.00786329	1.31834	0.091194	0.0575739	1.50961e+07	1.91735e+07	1.87873e+07	9.69858e+06	2.21048e+07	1.65083e+07	2.18765e+07	2.91398e+07	1.44764e+07	1.25117e+07	2.17942e+07	2.06556e+07	9.81241e+06	9.83732e+06	9.69341e+06
200POS		Cer(d43:3)+H	Cer(d43:3)+H	Cer	(d43:3)	(d43:3)				C43 H82 O3 N1	660.629	15.701	0.0184989	0.67765	0.0407882	0.197184	1.41287e+07	1.34579e+07	1.6693e+07	2.03162e+07	2.06056e+07	2.04704e+07	7.91533e+06	1.27104e+07	1.93956e+07	2.73345e+07	1.60616e+07	8.60879e+06	7.42707e+06	7.42261e+06	7.66527e+06
201POS		DG(18:0/20:4)+NH4	DG(38:4)+NH4	DG	(18:0/20:4)	(18:0)	(20:4)			C41 H76 O5 N1	662.572	11.6677	0.0702586	2.37303	0.0289903	0.37572	2.827e+07	2.16014e+07	8.68017e+07	2.0641e+07	2.73479e+07	1.25497e+08	2.93966e+07	7.96732e+07	3.3282e+07	3.06176e+07	4.0201e+07	8.50282e+07	4.0655e+07	3.53773e+07	3.74639e+07
202POS		DG(20:2/18:2)+NH4	DG(38:4)+NH4	DG	(20:2/18:2)	(20:2)	(18:2)			C41 H76 O5 N1	662.572	12.2265	0.0177983	2.43629	0.00516428	0.625299	9.60808e+07	1.3835e+08	2.25674e+08	5.49313e+07	1.14938e+08	3.20846e+08	1.31188e+08	133465256	7.54412e+07	5.70169e+07	8.61323e+07	2.30959e+08	6.3876e+07	6.3325e+07	6.17188e+07
204POS		DG(18:0/20:4)+NH4	DG(38:4)+NH4	DG	(18:0/20:4)	(18:0)	(20:4)			C41 H76 O5 N1	662.572	11.2005	0.0237124	1.46877	0.0337194	0.160695	2.64042e+07	2.40947e+07	2.93246e+07	19277146	1.99116e+07	4.52569e+07	3.28519e+07	2.48487e+07	2.58859e+07	1.71053e+07	1.41901e+07	2.395e+07	2.43821e+07	2.54342e+07	2.44569e+07
205POS		Cer(d18:1/25:1)+H	Cer(d43:2)+H	Cer	(d18:1/25:1)	(d18:1)	(25:1)			C43 H84 O3 N1	662.645	14.9342	0.0165179	2.43277	0.000156533	0.324132	2.08567e+07	5.85145e+07	6.79342e+07	1.22283e+07	3.56461e+07	3.82465e+07	4.88494e+07	6.41991e+07	20883769	1.81251e+07	2.9859e+07	5.70031e+07	1.95077e+07	1.9516e+07	1.8959e+07
206POS		DG(20:1/18:2)+NH4	DG(38:3)+NH4	DG	(20:1/18:2)	(20:1)	(18:2)			C41 H78 O5 N1	664.587	13.0337	0.0472321	2.15456	0.00270058	0.401587	5.30032e+07	6.72865e+07	1.73162e+08	3.25643e+07	6.00313e+07	1.18113e+08	8.96375e+07	106984832	4.74547e+07	6.17953e+07	5.80914e+07	1.19064e+08	3.98493e+07	3.99366e+07	3.67169e+07
207POS		DG(18:0/20:3)+NH4	DG(38:3)+NH4	DG	(18:0/20:3)	(18:0)	(20:3)			C41 H78 O5 N1	664.587	13.3392	0.0435822	1.77912	0.00608257	0.253953	3.05788e+07	4.24928e+07	7.48768e+07	2.19614e+07	5.49573e+07	4.44647e+07	5.68336e+07	6.69859e+07	2.67591e+07	2.18451e+07	3.81453e+07	5.99346e+07	2.38794e+07	2.39498e+07	2.21547e+07
208POS		Cer(d18:0+pO/24:2)+H	Cer(d42:2+pO)+H	Cer	(d18:0+pO/24:2)	(d18:0+pO)	(24:2)			C42 H82 O4 N1	664.624	12.628	0.0145317	3.4352	4.14969e-05	0.142104	1.74499e+06	1.01659e+07	9.02136e+06	1.98606e+06	3.79697e+06	4.89134e+06	8.30205e+06	9.19806e+06	2.45628e+06	1.85278e+06	3.30305e+06	1.04307e+07	2.39948e+06	2.33935e+06	2.39899e+06
209POS		Cer(d18:1/25:0)+H	Cer(d43:1)+H	Cer	(d18:1/25:0)	(d18:1)	(25:0)			C43 H86 O3 N1	664.66	16.1308	0.026193	1.27154	0.199238	0.00905374	1.68311e+07	17312939	1.6603e+07	7.70329e+06	1.14561e+07	1.13356e+07	1.11495e+07	1.59047e+07	1.41527e+07	1.12838e+07	1.54869e+07	2.54933e+07	7.82677e+06	7.4974e+06	7.46858e+06
20POS		LPE(16:0e)+H	LPE(16:0e)+H	LPE	(16:0e)	(16:0e)				C21 H47 O6 N1 P1	440.314	3.66217	0.0157877	3.89119	0.118074	0.149997	1.48534e+06	7.80867e+06	3.56038e+06	1.0135e+06	2.64332e+06	2.23698e+07	3.9541e+06	2.4615e+06	1.79477e+06	1.58231e+06	2.61165e+06	3.15803e+06	2.4154e+06	2.3681e+06	2.34136e+06
210POS		Cer(d18:1/25:0)+H	Cer(d43:1)+H	Cer	(d18:1/25:0)	(d18:1)	(25:0)			C43 H86 O3 N1	664.66	16.4435	0.0177668	1.8713	0.000692057	0.254341	2.77408e+07	4.94411e+07	5.85885e+07	2.00078e+07	3.76345e+07	3.78791e+07	4.63573e+07	5.37943e+07	2.16277e+07	1.85022e+07	3.79949e+07	5.99127e+07	1.94265e+07	1.90952e+07	1.87482e+07
211POS		DG(18:2/22:6)+H	DG(40:8)+H	DG	(18:2/22:6)	(18:2)	(22:6)			C43 H69 O5	665.514	10.5992	0.0103251	1.69038	0.25999	0.437788	4.15437e+07	4.00619e+07	1.00824e+08	3.83596e+07	8.06162e+07	2.36692e+08	5.45365e+07	55233592	5.75205e+07	3.42785e+07	7.18704e+07	6.0654e+07	3.65851e+07	3.65753e+07	3.59299e+07
212POS		DG(20:1/18:1)+NH4	DG(38:2)+NH4	DG	(20:1/18:1)	(20:1)	(18:1)			C41 H80 O5 N1	666.603	14.0235	0.0165987	2.08072	0.00222589	0.185629	1.89521e+07	1.94403e+07	3.84013e+07	8.02649e+06	1.33748e+07	2.7912e+07	2.00096e+07	2.19911e+07	1.30774e+07	9.5659e+06	1.18835e+07	2.80508e+07	1.02241e+07	9.98635e+06	9.90298e+06
213POS		DG(20:1/18:1)+NH4	DG(38:2)+NH4	DG	(20:1/18:1)	(20:1)	(18:1)			C41 H80 O5 N1	666.603	14.2942	0.110783	1.00838	0.968877	0.0806708	5.68898e+06	2.29368e+06	8.37842e+06	4.15254e+06	4.92817e+06	9.19321e+06	4.47565e+06	3.70939e+06	5.65595e+06	6.26166e+06	6.41193e+06	5.32634e+06	3.01977e+06	3.01911e+06	2.47489e+06
214POS		Cer(d18:1/24:0+O)+H	Cer(d42:1+O)+H	Cer	(d18:1/24:0+O)	(d18:1)	(24:0+O)			C42 H84 O4 N1	666.639	13.6396	0.0190522	2.49614	0.000257521	0.295108	1.86925e+07	6.57314e+07	5.45336e+07	1.11195e+07	2.81095e+07	3.21344e+07	4.52374e+07	4.63658e+07	1.79617e+07	1.51857e+07	2.45964e+07	4.47146e+07	1.67512e+07	1.66728e+07	1.61707e+07
215POS		DG(18:1/22:6)+H	DG(40:7)+H	DG	(18:1/22:6)	(18:1)	(22:6)			C43 H71 O5	667.53	11.3924	0.0222158	2.1892	0.0432403	0.457805	3.8517e+07	4.88466e+07	1.10668e+08	3.58604e+07	8.12817e+07	2.05269e+08	6.38242e+07	8.52621e+07	4.59446e+07	2.71408e+07	5.00088e+07	9.6378e+07	3.66563e+07	3.64077e+07	3.51606e+07
216POS		Cer(d18:0+pO/24:0)+H	Cer(d42:0+pO)+H	Cer	(d18:0+pO/24:0)	(d18:0+pO)	(24:0)			C42 H86 O4 N1	668.655	14.9917	0.0431583	2.04314	0.000728233	0.171123	1.13447e+07	3.56626e+07	2.51363e+07	1.04627e+07	1.24014e+07	1.9789e+07	2.16167e+07	2.04594e+07	1.08143e+07	1.06069e+07	1.4715e+07	2.10607e+07	1.10043e+07	1.02369e+07	1.02055e+07
217POS		DG(18:1/22:5)+H	DG(40:6)+H	DG	(18:1/22:5)	(18:1)	(22:5)			C43 H73 O5	669.545	11.6493	0.0201783	3.56526	0.0367744	0.278573	14111364	9.21707e+06	2.59687e+07	4.11531e+06	9.13039e+06	6.12701e+07	1.3568e+07	1.56558e+07	7.28548e+06	4.77164e+06	8.00959e+06	4.33984e+07	8.17243e+06	8.46149e+06	8.17256e+06
218POS		WE(47:9)+H	WE(47:9)+H	WE	(47:9)	(47:9)				H77 C47 O2	673.592	21.9666	0.0364294	1.0804	0.780084	0.157545	2.53816e+07	1.70671e+07	1.86161e+07	1.50632e+07	2.6833e+07	4.122e+07	1.59168e+07	6.59276e+06	2.28379e+07	2.05982e+07	1.81682e+07	3.98313e+07	2.19472e+07	2.19738e+07	2.06036e+07
219POS		Cer(d18:1/26:2)+H	Cer(d44:3)+H	Cer	(d18:1/26:2)	(d18:1)	(26:2)			C44 H84 O3 N1	674.645	14.456	0.0513669	3.92837	0.000632519	0.187723	3.52462e+06	1.97889e+07	1.73757e+07	1.94389e+06	5.62636e+06	6.28409e+06	1.51698e+07	1.73065e+07	2.61445e+06	2.78095e+06	5.40132e+06	1.00732e+07	3.93124e+06	3.93639e+06	3.59393e+06
21POS		AcCa(19:1)+H	AcCa(19:1)+H	AcCa	(19:1)	(19:1)				C26 H50 O4 N1	440.373	4.05633	0.0499677	0.571052	0.224098	0.0560255	1.61763e+06	1.86687e+06	673281	2.99325e+06	4.99898e+06	766473	877920	419438	2.78567e+06	794592	1.30885e+06	3.67568e+06	1.07837e+06	1.16346e+06	1.06053e+06
220POS		SM(d32:1)+H	SM(d32:1)+H	SM	(d32:1)	(d32:1)				C37 H76 O6 N2 P1	675.544	8.53585	0.0156698	2.59139	0.0217939	0.448913	3.69652e+07	9.09723e+07	9.55871e+07	2.34135e+07	8.95726e+07	6.16346e+07	1.45555e+08	1.297e+08	4.27639e+07	2.65621e+07	7.84414e+07	2.48057e+08	3.86063e+07	3.86006e+07	3.75651e+07
221POS		PC(28:1)+H	PC(28:1)+H	PC	(28:1)	(28:1)				C36 H71 O8 N1 P1	676.491	7.49113	0.0564248	4.0007	0.00355998	0.106168	670558	3.81643e+06	5.44924e+06	654333	1.76842e+06	1.34615e+06	5.60264e+06	7.42826e+06	1.70014e+06	1.37121e+06	1.84438e+06	8.39902e+06	1.74695e+06	1.58929e+06	1.58415e+06
222POS		Cer(d18:1/26:1)+H	Cer(d44:2)+H	Cer	(d18:1/26:1)	(d18:1)	(26:1)			C44 H86 O3 N1	676.66	15.5761	0.0150952	3.06806	0.000337998	0.203402	5.22847e+06	2.21022e+07	2.59422e+07	3.45046e+06	1.03305e+07	1.23883e+07	1.80292e+07	1.91789e+07	5.10635e+06	4.51581e+06	7.52652e+06	1.32945e+07	6.11698e+06	5.96337e+06	5.95643e+06
223POS		PC(28:0)+H	PC(28:0)+H	PC	(28:0)	(28:0)				C36 H73 O8 N1 P1	678.507	8.53848	0.0166316	3.59668	0.00656714	0.37301	1.22165e+07	6.43491e+07	6.54634e+07	1.47869e+07	2.85623e+07	2.42374e+07	6.968e+07	8.34431e+07	2.25431e+07	1.9618e+07	2.69327e+07	1.41187e+08	2.27902e+07	2.27878e+07	2.21387e+07
224POS		Cer(d18:1/26:0)+H	Cer(d44:1)+H	Cer	(d18:1/26:0)	(d18:1)	(26:0)			C44 H88 O3 N1	678.676	17.0894	0.0266505	1.80819	0.0268975	0.132843	5.40503e+06	1.11754e+07	2.0192e+07	5.18674e+06	8.80637e+06	1.73559e+07	8.24105e+06	9.79633e+06	5.42059e+06	6.76297e+06	1.05099e+07	9.34916e+06	4.93838e+06	4.95504e+06	4.72229e+06
225POS		TG(18:2/11:3/11:3)+H	TG(40:8)+H	TG	(18:2/11:3/11:3)	(18:2)	(11:3)	(11:3)		C43 H67 O6	679.493	8.29306	0.0779733	1.08609	0.800644	0.0186892	2.87095e+06	2.28375e+06	4.06011e+06	1.84924e+06	5.59213e+06	1.23775e+06	1.56597e+06	3.08987e+06	2.37168e+06	1.88087e+06	2.24414e+06	6.01871e+06	1.33494e+06	1.18004e+06	1.16061e+06
226POS		TG(4:0/16:0/18:2)+NH4	TG(38:2)+NH4	TG	(4:0/16:0/18:2)	(4:0)	(16:0)	(18:2)		C41 H78 O6 N1	680.582	13.5438	0.0260825	6.0014	0.104152	0.121015	594088	981322	3.57729e+06	2.92399e+06	3.16774e+06	1.96008e+06	4.18239e+06	2.58492e+07	826229	262296	1.3109e+06	1.7974e+07	4.16621e+06	3.98914e+06	3.97833e+06
227POS		DG(18:2/22:6)+NH4	DG(40:8)+NH4	DG	(18:2/22:6)	(18:2)	(22:6)			C43 H72 O5 N1	682.541	10.5992	0.00986628	1.72745	0.233229	1.69763	6.17753e+08	5.51691e+08	1527190364	5.48985e+08	1234751861	3509582486	8.74827e+08	8.62326e+08	875752696	5.19239e+08	1013951548	9.84158e+08	5.56189e+08	556121904	5.46705e+08
228POS		TG(4:0/16:0/18:1)+NH4	TG(38:1)+NH4	TG	(4:0/16:0/18:1)	(4:0)	(16:0)	(18:1)		C41 H80 O6 N1	682.598	14.5855	0.0271642	6.86732	0.20346	0.16222	2.02382e+06	4.16789e+06	4.69483e+06	6.12526e+06	2.98312e+06	2.73327e+06	4.92457e+06	1.74964e+07	1.03724e+06	1.28138e+06	1.93756e+06	7.16599e+07	1.16974e+07	1.11539e+07	1.11742e+07
22POS		AcCa(20:3)+H	AcCa(20:3)+H	AcCa	(20:3)	(20:3)				C27 H48 O4 N1	450.358	4.00735	0.0370163	4.07749	0.00273636	0.0604314	222937	526351	1.59467e+06	122465	797417	1.97726e+06	2.01211e+06	863273	165173	257686	483359	1.38125e+06	465343	497519	495386
230POS		DG(18:1/22:5)+NH4	DG(40:6)+NH4	DG	(18:1/22:5)	(18:1)	(22:5)			C43 H76 O5 N1	686.572	11.6493	0.0834118	2.2684	0.0140038	0.546591	7.6347e+07	8.56053e+07	1.71204e+08	4.11359e+07	8.46447e+07	2.80621e+08	1.19365e+08	1.39345e+08	1.29761e+08	4.26828e+07	7.10511e+07	2.14711e+08	9.53588e+07	1.10449e+08	1.10753e+08
231POS		DG(18:0/22:6)+NH4	DG(40:6)+NH4	DG	(18:0/22:6)	(18:0)	(22:6)			C43 H76 O5 N1	686.572	12.4141	0.0336197	2.28755	0.0142317	0.612213	8.60537e+07	1.20398e+08	4.08149e+08	8.36761e+07	2.19404e+08	1.86176e+08	2.83408e+08	3.84521e+08	8.80308e+07	9.48181e+07	1.31077e+08	2.25633e+08	8.96794e+07	8.9829e+07	8.46289e+07
232POS		DG(18:1/22:5)+NH4	DG(40:6)+NH4	DG	(18:1/22:5)	(18:1)	(22:5)			C43 H76 O5 N1	686.572	12.0693	0.0255348	3.55311	0.000412354	0.5932	3.47146e+07	1.16034e+08	1.74635e+08	2.30961e+07	7.34447e+07	2.06728e+08	9.56365e+07	1.44753e+08	3.74091e+07	2.22782e+07	4.58043e+07	1.03403e+08	4.34171e+07	4.15577e+07	4.15461e+07
233POS		PC(29:2)+H	PC(29:2)+H	PC	(29:2)	(29:2)				C37 H71 O8 N1 P1	688.491	9.232	0.0344506	2.05857	0.0284182	0.200195	1.08566e+07	3.53026e+07	2.74966e+07	1.11629e+07	2.71357e+07	1.69187e+07	4.21022e+07	5.78375e+07	2.47888e+07	1.70815e+07	2.84603e+07	6.63126e+07	1.71317e+07	1.62168e+07	1.60918e+07
234POS		DG(18:1/22:4)+NH4	DG(40:5)+NH4	DG	(18:1/22:4)	(18:1)	(22:4)			C43 H78 O5 N1	688.587	12.4967	0.0217269	2.35485	0.00158587	0.458358	3.92467e+07	68241638	1.65665e+08	3.76389e+07	7.86661e+07	1.39689e+08	8.9113e+07	1.14483e+08	4.34601e+07	4.20704e+07	5.42581e+07	1.1829e+08	3.97626e+07	3.9845e+07	3.83261e+07
235POS		DG(18:0/22:5)+NH4	DG(40:5)+NH4	DG	(18:0/22:5)	(18:0)	(22:5)			C43 H78 O5 N1	688.587	12.7992	0.0185118	2.73666	0.000427335	0.344129	2.14963e+07	3.30855e+07	7.66102e+07	1.46946e+07	3.13919e+07	6.24743e+07	5.31042e+07	7.56728e+07	2.25432e+07	1.36444e+07	2.52697e+07	5.21923e+07	2.16283e+07	2.16617e+07	2.0959e+07
236POS		SM(d33:1)+H	SM(d33:1)+H	SM	(d33:1)	(d33:1)				C38 H78 O6 N2 P1	689.559	9.14464	0.0173967	1.34519	0.159516	0.159744	1.52751e+08	2.33888e+08	1.97875e+08	9.28207e+07	2.16504e+08	1.43122e+08	1.84983e+08	251306125	1.64357e+08	1.27627e+08	2.59353e+08	3.52063e+08	1.11018e+08	1.11041e+08	1.07718e+08
237POS		PE(16:0/16:1)+H	PE(32:1)+H	PE	(16:0/16:1)	(16:0)	(16:1)			C37 H73 O8 N1 P1	690.507	10.1343	0.00475481	2.03709	0.00195551	0.35089	5.9622e+07	1.75384e+08	9.25286e+07	6.23774e+07	6.71865e+07	8.04646e+07	1.45776e+08	1.26976e+08	5.57831e+07	5.01661e+07	6.03512e+07	1.0303e+08	7.78528e+07	7.72219e+07	77208558
238POS		DG(18:0/22:4)+NH4	DG(40:4)+NH4	DG	(18:0/22:4)	(18:0)	(22:4)			C43 H80 O5 N1	690.603	13.6254	0.0286946	1.93003	0.00904534	0.128315	4.88262e+06	9.40052e+06	1.88264e+07	4.88243e+06	1.10602e+07	1.09409e+07	1.23893e+07	1.84963e+07	5.34762e+06	6.069e+06	9.64236e+06	1.07843e+07	5.3555e+06	5.36391e+06	5.09777e+06
239POS		PC(30:0e)+H	PC(30:0e)+H	PC	(30:0e)	(30:0e)				C38 H79 O7 N1 P1	692.559	10.3635	0.0155894	2.54451	0.00108446	0.432456	3.73932e+07	1.50097e+08	1.29507e+08	4.00978e+07	5.34295e+07	5.61914e+07	1.32362e+08	1.07514e+08	3.48895e+07	3.88571e+07	5.41672e+07	8.29357e+07	5.76701e+07	5.74603e+07	5.60353e+07
23POS		LPE(16:1)+H	LPE(16:1)+H	LPE	(16:1)	(16:1)				C21 H43 O7 N1 P1	452.277	2.44874	0.0213734	1.51816	0.021034	0.12618	1.32267e+07	2.97528e+07	2.11173e+07	9.87537e+06	2.62915e+07	2.60204e+07	2.12861e+07	2.51037e+07	1.65842e+07	9.49981e+06	2.24387e+07	2.53725e+07	1.21571e+07	1.26104e+07	1.21526e+07
240POS		DG(22:1/18:2)+NH4	DG(40:3)+NH4	DG	(22:1/18:2)	(22:1)	(18:2)			C43 H82 O5 N1	692.619	14.2227	0.0364882	1.69813	0.0197295	0.0584168	2.21685e+06	2.43093e+06	5.36507e+06	1.37085e+06	2.10495e+06	4.06288e+06	2.36786e+06	2.62536e+06	1.90809e+06	2.06004e+06	2.17476e+06	3.2462e+06	1.67948e+06	1.57908e+06	1.57623e+06
241POS		TG(39:2)+NH4	TG(39:2)+NH4	TG	(39:2)	(39:2)				C42 H80 O6 N1	694.598	14.0074	0.012161	2.22682	0.15574	0.1194	3.9892e+06	6.43183e+06	1.8308e+07	4.63274e+06	1.08516e+07	1.41418e+06	1.15742e+07	3.77362e+07	1.049e+07	2.26008e+06	8.04566e+06	1.42082e+07	6.00264e+06	6.12847e+06	5.99976e+06
242POS		TG(4:0/17:0/18:1)+NH4	TG(39:1)+NH4	TG	(4:0/17:0/18:1)	(4:0)	(17:0)	(18:1)		C42 H82 O6 N1	696.614	15.0609	0.0412779	1.64693	0.278111	0.050211	3.2732e+06	3.46451e+06	6.44164e+06	4.38702e+06	4.8979e+06	1.15208e+06	4.11768e+06	1.63387e+07	6.54704e+06	1.63545e+06	3.74111e+06	8.80512e+06	3.75615e+06	3.49963e+06	3.50001e+06
243POS		Cer(d46:6)+H	Cer(d46:6)+H	Cer	(d46:6)	(d46:6)				C46 H82 O3 N1	696.629	14.413	0.0125977	1.89976	0.00333446	0.126389	4.39992e+06	1.67076e+07	1.3197e+07	4.05799e+06	9.87438e+06	8.49472e+06	1.09847e+07	1.4623e+07	6.36477e+06	5.88746e+06	8.77209e+06	1.07612e+07	5.33137e+06	5.21508e+06	5.32972e+06
244POS		SM(d34:4)+H	SM(d34:4)+H	SM	(d34:4)	(d34:4)				C39 H74 O6 N2 P1	697.528	8.54548	0.0143173	1.9034	0.00851878	0.184024	1.18948e+07	2.36347e+07	2.42596e+07	9.55976e+06	2.47226e+07	1.64254e+07	3.43816e+07	3.11906e+07	1.26568e+07	1.07635e+07	1.88646e+07	3.84866e+07	1.34637e+07	1.33244e+07	1.30873e+07
245POS		CerG1(d18:1/16:0)+H	CerG1(d34:1)+H	CerG1	(d18:1/16:0)	(d18:1)	(16:0)			C40 H78 O8 N1	700.572	10.1299	0.0125616	1.34505	0.103272	0.14591	8.76521e+07	9.97793e+07	1.88039e+08	6.56201e+07	1.11706e+08	8.72923e+07	1.36297e+08	1.09161e+08	8.55442e+07	7.73316e+07	1.35739e+08	137493635	9.54012e+07	9.54031e+07	9.33414e+07
246POS		SM(d34:2)+H	SM(d34:2)+H	SM	(d34:2)	(d34:2)				C39 H78 O6 N2 P1	701.559	8.97082	0.0458711	1.63428	0.0464585	0.201682	3.31015e+07	6.85939e+07	5.63701e+07	3.29636e+07	6.29038e+07	3.89371e+07	9.21338e+07	6.85619e+07	3.65816e+07	3.26518e+07	6.80334e+07	1.10508e+08	2.48557e+07	2.48584e+07	2.29331e+07
247POS		PC(30:2)+H	PC(30:2)+H	PC	(30:2)	(30:2)				C38 H73 O8 N1 P1	702.507	7.76287	0.0192952	2.38341	0.0265061	0.177609	5.4701e+06	1.68774e+07	2.58857e+07	4.54172e+06	1.48556e+07	1.03625e+07	2.4382e+07	3.33227e+07	1.54371e+07	1.0306e+07	1.66091e+07	4.93815e+07	9.99668e+06	9.78835e+06	9.61911e+06
248POS		PE(16:0p/18:1)+H	PE(34:1p)+H	PE	(16:0p/18:1)	(16:0p)	(18:1)			C39 H77 O7 N1 P1	702.543	11.5967	0.0203571	2.29966	0.00336434	0.427289	3.52399e+07	1.67452e+08	1.6143e+08	6.46423e+07	7.88548e+07	6.21361e+07	1.71902e+08	1.10412e+08	4.97134e+07	4.58169e+07	6.39285e+07	1.04402e+08	5.43706e+07	5.45058e+07	5.25446e+07
249POS		SM(d34:1)+H	SM(d34:1)+H	SM	(d34:1)	(d34:1)				C39 H80 O6 N2 P1	703.575	9.73672	0.0145318	1.26365	0.0449857	0.863898	7506823340	9600128549	10196561371	6954790704	7313265120	7074255950	11096794741	9622841292	6749385051	6212175619	10862201213	10030165880	6278051712	6434044471	6443097408
24POS		LPE(16:0)+H	LPE(16:0)+H	LPE	(16:0)	(16:0)				C21 H45 O7 N1 P1	454.293	3.12801	0.00963959	1.49336	0.0187974	0.731414	5.1462e+08	9.10065e+08	8.93166e+08	3.79287e+08	9.99075e+08	7.07453e+08	8.99974e+08	1127457321	5.79491e+08	5.32068e+08	7.79259e+08	1112480082	501710575	5.06462e+08	4.96791e+08
250POS		PC(30:1)+H	PC(30:1)+H	PC	(30:1)	(30:1)				C38 H75 O8 N1 P1	704.522	8.97069	0.0361362	2.09726	0.0565406	0.266663	2.32673e+07	3.64441e+07	8.7982e+07	2.89981e+07	5.20221e+07	4.07161e+07	1.35367e+08	1.19595e+08	3.68333e+07	3.04949e+07	4.73861e+07	3.92008e+07	3.42863e+07	3.42444e+07	3.21648e+07
252POS		PE(33:1)+H	PE(33:1)+H	PE	(33:1)	(33:1)				C38 H75 O8 N1 P1	704.522	10.5867	0.0261888	2.06866	0.0173388	0.148537	1.05602e+07	3.72848e+07	1.34837e+07	7.65203e+06	1.22845e+07	1.16776e+07	2.01109e+07	2.50686e+07	1.02832e+07	8.24907e+06	1.26933e+07	2.00571e+07	1.05804e+07	1.0433e+07	1.00546e+07
253POS		PE(34:1e)+H	PE(34:1e)+H	PE	(34:1e)	(34:1e)				C39 H79 O7 N1 P1	704.559	11.7018	0.0204669	3.59431	0.00111612	0.2307	7.27493e+06	4.11552e+07	3.23723e+07	6.93467e+06	8.1627e+06	1.77798e+07	2.70411e+07	1.86328e+07	4.21871e+06	9.45061e+06	6.61566e+06	1.63422e+07	1.28942e+07	1.24605e+07	1.24359e+07
254POS		SM(d34:0)+H	SM(d34:0)+H	SM	(d34:0)	(d34:0)				C39 H82 O6 N2 P1	705.591	10.156	0.016204	0.629664	0.106589	1.26743	4.04853e+08	5.21636e+08	5.31166e+08	1179457574	1570164307	9.23685e+08	5.83029e+08	5.05082e+08	9.37899e+08	1068821751	446388696	4.66298e+08	7.69179e+08	7.48562e+08	7.47455e+08
256POS		DG(20:4/22:6)+NH4	DG(42:10)+NH4	DG	(20:4/22:6)	(20:4)	(22:6)			C45 H72 O5 N1	706.541	10.3636	0.00524942	2.52144	0.0593154	0.712673	6.58214e+07	8.66279e+07	2.66825e+08	6.94734e+07	1.20036e+08	4.79241e+08	1.22381e+08	1.6928e+08	9.65094e+07	6.83396e+07	8.15363e+07	1.40692e+08	6.93207e+07	6.93222e+07	6.86931e+07
257POS		TG(6:0/16:0/18:2)+NH4	TG(40:2)+NH4	TG	(6:0/16:0/18:2)	(6:0)	(16:0)	(18:2)		C43 H82 O6 N1	708.614	14.4837	0.0253248	3.81907	0.0513453	0.153777	2.05866e+06	7.0978e+06	1.02697e+07	6.99242e+06	4.61836e+06	1.27317e+06	1.3931e+07	3.28719e+07	4.37815e+06	2.26449e+06	5.00441e+06	3.12419e+07	7.26014e+06	6.94755e+06	6.954e+06
258POS		DG(22:4/20:4)+NH4	DG(42:8)+NH4	DG	(22:4/20:4)	(22:4)	(20:4)			C45 H76 O5 N1	710.572	11.3863	0.0299699	2.49804	0.0535085	0.379382	2.61598e+07	3.71367e+07	6.68746e+07	1.97924e+07	2.83279e+07	1.40673e+08	3.12957e+07	4.70906e+07	2.91948e+07	1.72468e+07	2.62198e+07	4.39946e+07	2.5957e+07	2.59382e+07	2.46237e+07
259POS		TG(40:1)+NH4	TG(40:1)+NH4	TG	(40:1)	(40:1)				C43 H84 O6 N1	710.629	14.576	0.0173008	6.48389	0.173649	0.142437	1.71438e+06	3.62836e+06	4.44938e+06	4.17197e+06	2.35971e+06	2.57385e+06	4.64255e+06	1.34992e+07	1.44144e+06	960178	1.55202e+06	5.03081e+07	7.75112e+06	7.52542e+06	7.52144e+06
25POS		AcCa(20:0)+H	AcCa(20:0)+H	AcCa	(20:0)	(20:0)				C27 H54 O4 N1	456.405	5.507	0.0203441	1.62224	0.0787025	0.0649999	3.97826e+06	7.22188e+06	1.28116e+07	6.0446e+06	9.65922e+06	6.08341e+06	1.51208e+07	5.04634e+06	4.25469e+06	4.59869e+06	7.07991e+06	1.14927e+07	5.50213e+06	5.49637e+06	5.30779e+06
260POS		TG(6:0/16:0/18:1)+NH4	TG(40:1)+NH4	TG	(6:0/16:0/18:1)	(6:0)	(16:0)	(18:1)		C43 H84 O6 N1	710.629	15.5	0.0308199	4.78583	0.0897264	0.14545	1.54617e+06	5.10453e+06	7.81188e+06	4.83378e+06	4.04304e+06	1.86971e+06	7.9948e+06	2.20041e+07	2.66458e+06	2.58824e+06	2.14815e+06	4.05173e+07	9.17732e+06	8.71187e+06	8.69698e+06
261POS		SM(d33:1)+Na	SM(d33:1)+Na	SM	(d33:1)	(d33:1)				C38 H77 O6 N2 P1 Na1	711.541	9.14464	0.00775124	1.2166	0.183177	0.0294464	2.07557e+07	2.1445e+07	2.08667e+07	1.74674e+07	1.43067e+07	1.47713e+07	1.83359e+07	2.91623e+07	2.07406e+07	1.37096e+07	1.27819e+07	1.6789e+07	2.61349e+07	2.6486e+07	2.61323e+07
262POS		PE(14:0/20:4)+H	PE(34:4)+H	PE	(14:0/20:4)	(14:0)	(20:4)			C39 H71 O8 N1 P1	712.491	9.02686	0.0374023	1.63236	0.040624	0.121571	1.28488e+07	2.77898e+07	2.2828e+07	7.5766e+06	2.10165e+07	1.22848e+07	2.79319e+07	2.69915e+07	1.78401e+07	1.4099e+07	2.32222e+07	3.98648e+07	1.03857e+07	1.10666e+07	1.03732e+07
263POS		TG(16:0/10:0/14:0)+NH4	TG(40:0)+NH4	TG	(16:0/10:0/14:0)	(16:0)	(10:0)	(14:0)		C43 H86 O6 N1	712.645	16.704	0.0613	7.57341	0.215278	0.201848	2.57573e+06	6.00012e+06	9.13696e+06	5.40097e+06	3.62294e+06	3.50399e+06	1.59698e+07	1.17555e+07	2.40503e+06	4.17276e+06	2.95849e+06	1.13705e+08	1.12117e+07	1.01046e+07	1.13011e+07
264POS		PE(16:0/16:0)+Na	PE(32:0)+Na	PE	(16:0/16:0)	(16:0)	(16:0)			C37 H74 O8 N1 P1 Na1	714.504	9.71707	0.0153505	1.32591	0.0758259	0.107263	9.36012e+07	9.25576e+07	7.86854e+07	4.73209e+07	8.18479e+07	6.2421e+07	1.21707e+08	1.11985e+08	6.24118e+07	5.42442e+07	8.49803e+07	9.53701e+07	5.6171e+07	5.47057e+07	5.47014e+07
265POS		PE(34:3)+H	PE(34:3)+H	PE	(34:3)	(34:3)				C39 H73 O8 N1 P1	714.507	7.695	0.105312	1.54977	0.174642	0.0955639	1.97978e+07	1.2998e+07	4.14802e+07	6.50471e+06	1.31537e+07	1.98856e+07	3.51861e+07	1.39907e+07	2.24988e+07	1.01676e+07	3.28589e+07	3.91562e+07	6.05332e+06	6.06399e+06	5.01691e+06
266POS		PE(34:3)+H	PE(34:3)+H	PE	(16:0/18:3)	(16:0)	(18:3)			C39 H73 O8 N1 P1	714.507	9.35797	0.0140678	1.26539	0.292969	0.139029	1.81123e+08	3.94831e+08	261110146	1.71259e+08	4.25694e+08	2.6024e+08	4.70009e+08	3.39799e+08	2.69619e+08	210789130	5.00141e+08	4.99349e+08	1.67154e+08	1.65439e+08	1.6256e+08
267POS		DG(20:2/22:4)+NH4	DG(42:6)+NH4	DG	(20:2/22:4)	(20:2)	(22:4)			C45 H80 O5 N1	714.603	12.4157	0.0167805	2.44953	0.00644718	0.37763	2.58699e+07	4.22143e+07	1.25367e+08	2.42743e+07	6.98149e+07	7.45925e+07	8.92931e+07	1.12617e+08	2.8664e+07	2.29995e+07	3.56624e+07	6.36663e+07	2.36737e+07	2.33494e+07	22895105
268POS		PC(31:2)+H	PC(31:2)+H	PC	(31:2)	(31:2)				C39 H75 O8 N1 P1	716.522	10.3153	0.00938009	0.968835	0.796156	2.0113	4251679496	4338823598	5786453478	4221758594	6677778427	4605839662	6891342757	5618486733	5457831904	6130472974	7605601288	6033822873	4361690240	4355247675	4288259380
269POS		PC(31:2)+H	PC(31:2)+H	PC	(31:2)	(31:2)				C39 H75 O8 N1 P1	716.522	8.34214	0.0923281	1.61305	0.0513205	0.0651588	2.88375e+06	7.9962e+06	7.8375e+06	3.22389e+06	7.69761e+06	4.27513e+06	7.53137e+06	1.06576e+07	5.92828e+06	4.81349e+06	7.25268e+06	1.29966e+07	4.72434e+06	4.05212e+06	4.03154e+06
26POS		Cer(d28:0)+H	Cer(d28:0)+H	Cer	(d28:0)	(d28:0)				C28 H58 O3 N1	456.441	6.30285	0.0160282	1.29418	0.253767	0.0412742	7.7456e+06	1.14217e+07	1.02103e+07	5.01455e+06	1.20932e+07	1.03909e+07	1.34839e+07	4.93917e+06	6.93111e+06	5.10806e+06	1.36385e+07	1.49502e+07	4.89821e+06	4.77249e+06	4.75806e+06
270POS		SM(d34:2+hO)+H	SM(d34:2+hO)+H	SM	(d34:2+hO)	(d34:2+hO)				C39 H78 O7 N2 P1	717.554	8.32969	0.0349983	2.2904	0.0102571	0.119759	3.96698e+06	1.56575e+07	1.05345e+07	3.26233e+06	8.08679e+06	5.08875e+06	1.32194e+07	6.37998e+06	3.34789e+06	3.23798e+06	6.31833e+06	1.37555e+07	3.71897e+06	3.93408e+06	3.6929e+06
271POS		PC(31:1)+H	PC(31:1)+H	PC	(31:1)	(31:1)				C39 H77 O8 N1 P1	718.538	9.27009	0.0135397	2.3604	0.00105346	0.525851	5.61748e+07	2.4531e+08	1.56492e+08	5.06593e+07	1.05665e+08	9.50248e+07	1.92635e+08	1.9669e+08	7.8175e+07	6.80885e+07	8.53624e+07	1.62157e+08	7.78061e+07	7.67094e+07	7.57288e+07
272POS		PE(34:1)+H	PE(34:1)+H	PE	(16:0/18:1)	(16:0)	(18:1)			C39 H77 O8 N1 P1	718.538	11.0659	0.0235096	2.25026	0.00788452	0.959523	3.25782e+08	1354951838	6.37132e+08	3.92377e+08	3.68623e+08	3.86954e+08	6.69611e+08	1022812802	3.98531e+08	3.46308e+08	3.79166e+08	9.0339e+08	5.54007e+08	5.54419e+08	5.3195e+08
273POS		PC(32:1e)+H	PC(32:1e)+H	PC	(32:1e)	(32:1e)				C40 H81 O7 N1 P1	718.575	10.4226	0.00714784	2.6184	0.00230979	0.615499	5.90281e+07	2.90252e+08	270394416	6.3551e+07	1.15685e+08	1.09973e+08	2.73511e+08	1.79114e+08	7.08638e+07	6.84742e+07	1.09322e+08	1.51716e+08	9.80944e+07	9.93132e+07	9.80931e+07
274POS		PC(32:1e)+H	PC(32:1e)+H	PC	(32:1e)	(32:1e)				C40 H81 O7 N1 P1	718.575	11.1988	0.0160668	1.63458	0.00846662	0.288035	8.074e+07	1.7337e+08	2.10519e+08	1.16739e+08	8.80757e+07	9.30151e+07	1.7212e+08	2.05192e+08	1.07781e+08	9.94504e+07	1.07535e+08	1.27059e+08	1.12355e+08	1.09444e+08	1.09149e+08
275POS		TG(41:4)+NH4	TG(41:4)+NH4	TG	(41:4)	(41:4)				C44 H80 O6 N1	718.598	13.6528	0.024147	1.68332	0.120379	0.0516991	2.1863e+06	3.21056e+06	5.44894e+06	2.33683e+06	5.14962e+06	3.55815e+06	3.2273e+06	1.02689e+07	4.16745e+06	1.39353e+06	3.22898e+06	5.36475e+06	1.87819e+06	1.87073e+06	1.79741e+06
276POS		SM(d34:1+pO)+H	SM(d34:1+pO)+H	SM	(d34:1+pO)	(d34:1+pO)				C39 H80 O7 N2 P1	719.57	9.35788	0.0239517	4.16144	0.0117375	0.825987	5.23826e+07	645536314	3.30522e+08	7.31164e+07	1.13293e+08	9.99678e+07	4.84361e+08	2.34801e+08	7.08089e+07	7.13561e+07	9.96467e+07	2.04811e+08	1.19718e+08	119749001	1.14834e+08
277POS		PC(31:0)+H	PC(31:0)+H	PC	(31:0)	(31:0)				C39 H79 O8 N1 P1	720.554	10.0814	0.00961869	1.94494	0.00441873	0.826709	2.38718e+08	7.91623e+08	7.13891e+08	2.68028e+08	3.00506e+08	3.29305e+08	6.03737e+08	7.85574e+08	3.50063e+08	3.29433e+08	3.98837e+08	4.43229e+08	3.98154e+08	3.98105e+08	3.91533e+08
278POS		PE(34:0)+H	PE(34:0)+H	PE	(34:0)	(34:0)				C39 H79 O8 N1 P1	720.554	11.9984	0.0115591	1.89275	0.000340715	0.278217	2.83068e+07	6.82452e+07	6.58219e+07	3.01244e+07	5.19063e+07	5.458e+07	5.15536e+07	6.76353e+07	3.41018e+07	2.86138e+07	3.29791e+07	8.21309e+07	3.25773e+07	3.23015e+07	3.18398e+07
27POS		LPC(14:0)+H	LPC(14:0)+H	LPC	(14:0)	(14:0)				C22 H47 O7 N1 P1	468.308	2.26041	0.0282329	2.06117	0.00348015	0.365105	3.55504e+07	9.94576e+07	1.05867e+08	2.41785e+07	7.18731e+07	7.95779e+07	6.54629e+07	1.37235e+08	6.04338e+07	3.90478e+07	6.87794e+07	1.30467e+08	4.08917e+07	4.28853e+07	4.08189e+07
280POS		SM(d34:0+pO)+H	SM(d34:0+pO)+H	SM	(d34:0+pO)	(d34:0+pO)				C39 H82 O7 N2 P1	721.585	9.15087	0.138708	2.32802	0.174313	0.233962	4.41285e+06	9.03526e+07	2.79133e+07	4.7888e+06	4.60359e+07	2.72863e+07	2.88336e+07	2.80501e+07	1.33337e+07	1.01955e+07	1.00799e+07	4.40047e+06	1.28625e+07	1.28389e+07	9.99232e+06
281POS		TG(9:0/14:0/18:2)+NH4	TG(41:2)+NH4	TG	(9:0/14:0/18:2)	(9:0)	(14:0)	(18:2)		C44 H84 O6 N1	722.629	15.1053	0.0241917	0.597011	0.146467	0.207272	1.58327e+07	8.37997e+06	1.53982e+07	3.05521e+07	2.19992e+07	2.71363e+06	1.17044e+07	2.63134e+07	4.81972e+07	1.29204e+07	2.41706e+07	2.72344e+07	1.23775e+07	1.23968e+07	1.18755e+07
282POS		PC(30:2)+Na	PC(30:2)+Na	PC	(30:2)	(30:2)				C38 H72 O8 N1 P1 Na1	724.489	7.76287	0.0256082	3.47553	0.0155226	0.102398	723238	3.39443e+06	5.27171e+06	584658	2.46484e+06	1.85471e+06	5.4624e+06	7.85575e+06	2.16288e+06	1.45508e+06	2.76515e+06	1.1458e+07	2.04372e+06	1.96263e+06	1.95003e+06
284POS		PE(34:2e)+Na	PE(34:2e)+Na	PE	(34:2e)	(34:2e)				C39 H76 O7 N1 P1 Na1	724.525	11.5782	0.0161631	1.84954	0.00756456	0.105899	5.90076e+06	2.17176e+07	1.57855e+07	1.15044e+07	9.19083e+06	9.32897e+06	1.96636e+07	1.39881e+07	7.53495e+06	7.30186e+06	8.14414e+06	1.12105e+07	8.3558e+06	8.13001e+06	8.1225e+06
285POS		TG(16:0/9:0/16:1)+NH4	TG(41:1)+NH4	TG	(16:0/9:0/16:1)	(16:0)	(9:0)	(16:1)		C44 H86 O6 N1	724.645	16.2196	0.0395135	0.74057	0.405061	0.127688	1.00183e+07	6.45629e+06	9.15931e+06	1.63912e+07	1.3354e+07	1.5347e+06	7.04414e+06	2.23929e+07	2.69048e+07	6.55749e+06	1.16318e+07	1.62556e+07	6.8838e+06	6.44865e+06	6.4192e+06
286POS		SM(d36:4)+H	SM(d36:4)+H	SM	(d36:4)	(d36:4)				C41 H78 O6 N2 P1	725.559	9.69807	0.0458799	0.835404	0.0135311	0.617444	2.9149e+08	2.49946e+08	2.5184e+08	2.73307e+08	2.74204e+08	2.77859e+08	202296368	2.59323e+08	3.11073e+08	2.69778e+08	2.91171e+08	1.88129e+08	3.91119e+08	4.23648e+08	4.24221e+08
287POS		Co(Q8)+H	Co(Q8)+H	Co	(Q8)	(Q8)				C49 H75 O4	727.566	13.9851	0.0160332	1.0657	0.730686	0.243597	2.25361e+08	1.78282e+08	3.36736e+08	1.70398e+08	3.74321e+08	2.57862e+08	2.86659e+08	2.87405e+08	266645889	2.25719e+08	4.09633e+08	4.34997e+08	148444613	1.48179e+08	1.44238e+08
288POS		PC(32:3)+H	PC(32:3)+H	PC	(32:3)	(32:3)				C40 H75 O8 N1 P1	728.522	8.3837	0.0201803	2.54863	0.00708115	0.470696	3.19766e+07	143302448	1.25284e+08	1.88445e+07	7.98104e+07	6.90544e+07	1.69984e+08	1.74491e+08	9.64041e+07	6.33227e+07	7.79291e+07	2.56511e+08	4.65067e+07	4.53722e+07	4.46879e+07
289POS		PC(30:0)+Na	PC(30:0)+Na	PC	(30:0)	(30:0)				C38 H76 O8 N1 P1 Na1	728.52	9.75399	0.0246397	1.70616	0.000226137	0.228623	3.38699e+07	8.16656e+07	6.72717e+07	3.65604e+07	4.33948e+07	5.86201e+07	5.55537e+07	6.40602e+07	4.36928e+07	3.43387e+07	3.14258e+07	5.3783e+07	9.60178e+07	9.20584e+07	9.20088e+07
28POS		LPE(17:0)+H	LPE(17:0)+H	LPE	(17:0)	(17:0)				C22 H47 O7 N1 P1	468.308	3.6874	0.0132635	1.75745	0.0274892	0.14807	1.28369e+07	3.14062e+07	2.30711e+07	8.6517e+06	2.14649e+07	1.78387e+07	1.96427e+07	4.5575e+07	1.70113e+07	1.3659e+07	2.14349e+07	2.95276e+07	1.24166e+07	1.24172e+07	1.21338e+07
290POS		PE(18:1p/18:1)+H	PE(36:2p)+H	PE	(18:1p/18:1)	(18:1p)	(18:1)			C41 H79 O7 N1 P1	728.559	11.6602	0.00119117	1.67397	0.0280771	0.286273	4.62248e+07	1.51137e+08	1.07218e+08	4.62004e+07	9.08318e+07	6.15416e+07	1.09841e+08	7.35218e+07	4.25498e+07	5.24302e+07	7.15328e+07	8.22442e+07	4.20821e+07	4.19958e+07	4.20829e+07
291POS		SM(d36:2)+H	SM(d36:2)+H	SM	(d36:2)	(d36:2)				C41 H82 O6 N2 P1	729.591	9.90772	0.0153151	1.52785	0.0211492	0.172352	2.58521e+07	3.10222e+07	4.33797e+07	2.98731e+07	4.45457e+07	4.5465e+07	4.44113e+07	4.12964e+07	1.87642e+07	1.06749e+07	3.14476e+07	4.06508e+07	3.50712e+07	3.5996e+07	3.50449e+07
293POS		PE(35:2)+H	PE(35:2)+H	PE	(35:2)	(35:2)				C40 H77 O8 N1 P1	730.538	10.6915	0.0507786	0.949137	0.544624	0.204557	4.56362e+07	5.05235e+07	4.42858e+07	3.37594e+07	4.48931e+07	4.40641e+07	4.67374e+07	4.31038e+07	4.99885e+07	5.30899e+07	6.11253e+07	4.51043e+07	4.75016e+07	5.16985e+07	4.73111e+07
294POS		PE(36:2e)+H	PE(36:2e)+H	PE	(36:2e)	(36:2e)				C41 H81 O7 N1 P1	730.575	11.9388	0.013295	2.04984	0.0107059	0.269026	2.49082e+07	9.0307e+07	7.08307e+07	1.71315e+07	4.28805e+07	3.3037e+07	5.96036e+07	3.85546e+07	2.44972e+07	2.35458e+07	3.58383e+07	5.36824e+07	2.45874e+07	2.45781e+07	2.4021e+07
295POS		PE(18:0p/18:1)+H	PE(36:1p)+H	PE	(18:0p/18:1)	(18:0p)	(18:1)			C41 H81 O7 N1 P1	730.575	12.6482	0.0338108	1.80231	0.0119456	0.180104	1.1153e+07	5.06584e+07	4.77659e+07	2.80728e+07	3.0667e+07	2.02454e+07	5.13297e+07	3.81094e+07	2.05006e+07	1.88737e+07	2.37571e+07	3.16417e+07	2.32363e+07	2.32915e+07	2.19284e+07
296POS		SM(d36:1)+H	SM(d36:1)+H	SM	(d36:1)	(d36:1)				C41 H84 O6 N2 P1	731.606	10.7484	0.0369248	1.19962	0.114821	0.310396	2.62126e+08	2.71693e+08	3.39863e+08	3.16933e+08	3.94495e+08	3.42138e+08	3.38691e+08	3.89574e+08	240568892	1.90343e+08	3.00157e+08	3.62948e+08	4.36746e+08	4.0997e+08	4.09942e+08
298POS		PC(32:1)+H	PC(32:1)+H	PC	(32:1)	(32:1)				C40 H79 O8 N1 P1	732.554	10.4017	0.00844602	2.00606	0.00284706	0.456113	6.08388e+07	1.08654e+08	1.2718e+08	5.33343e+07	8.90243e+07	2.0792e+08	1.29854e+08	1.16781e+08	6.77411e+07	5.11253e+07	7.23547e+07	1.00836e+08	6.56069e+07	6.56017e+07	6.46493e+07
299POS		PC(32:1)+H	PC(32:1)+H	PC	(32:1)	(32:1)				C40 H79 O8 N1 P1	732.554	10.0685	0.0180388	1.35525	0.0805676	0.192432	106007337	2.34243e+08	1.17278e+08	1.10895e+08	1.37165e+08	1.29212e+08	1.43498e+08	1.86088e+08	1.18271e+08	7.30549e+07	1.52606e+08	1.35647e+08	126480520	1.26487e+08	1.30477e+08
29POS		LPE(18:0e)+H	LPE(18:0e)+H	LPE	(18:0e)	(18:0e)				C23 H51 O6 N1 P1	468.345	5.17586	0.0172513	2.68761	0.084791	0.156977	2.79317e+06	9.15442e+06	6.78935e+06	2.33257e+06	5.644e+06	2.53524e+07	6.54565e+06	4.77239e+06	3.91765e+06	2.99495e+06	4.1341e+06	6.01982e+06	4.28192e+06	4.27051e+06	4.15008e+06
2POS		So(d18:1)+H	So(d18:1)+H	So	(d18:1)	(d18:1)				C18 H38 O2 N1	300.29	2.73307	0.0123523	3.23809	4.62423e-05	0.513027	2.27064e+07	1.00717e+08	1.13395e+08	1.8459e+07	5.59638e+07	7.54804e+07	1.20722e+08	1.1382e+08	3.19007e+07	2.39093e+07	5.30313e+07	1.42818e+08	3.56914e+07	3.60285e+07	3.51558e+07
300POS		TG(6:0/16:0/20:4)+NH4	TG(42:4)+NH4	TG	(6:0/16:0/20:4)	(6:0)	(16:0)	(20:4)		C45 H82 O6 N1	732.614	14.192	0.0345873	2.83964	0.115607	0.0725314	1.21235e+06	2.07502e+06	4.43236e+06	1.9092e+06	2.08399e+06	310347	3.97842e+06	1.31788e+07	2.31314e+06	1.00845e+06	1.73244e+06	5.15855e+06	1.68634e+06	1.69008e+06	1.58911e+06
301POS		SM(d36:0)+H	SM(d36:0)+H	SM	(d36:0)	(d36:0)				C41 H86 O6 N2 P1	733.622	11.167	0.0438576	0.601822	0.11695	0.565371	5.69905e+07	6.05128e+07	9.60003e+07	2.29201e+08	2.62952e+08	1.6748e+08	9.50945e+07	1.19128e+08	1.67388e+08	2.36955e+08	6.80534e+07	7.65685e+07	1.54071e+08	1.54442e+08	1.42833e+08
303POS		PC(33:0e)+H	PC(33:0e)+H	PC	(33:0e)	(33:0e)				C41 H85 O7 N1 P1	734.606	11.8441	0.0179379	2.13146	0.00852945	0.212266	1.06458e+07	4.93732e+07	3.54198e+07	9.44107e+06	1.79574e+07	1.40458e+07	3.47772e+07	3.58196e+07	1.58167e+07	1.48105e+07	2.22365e+07	2.43305e+07	1.73025e+07	1.70609e+07	1.6696e+07
304POS		PE(16:0/18:3)+Na	PE(34:3)+Na	PE	(16:0/18:3)	(16:0)	(18:3)			C39 H72 O8 N1 P1 Na1	736.489	9.35797	0.0298386	1.16185	0.214952	0.0662534	2.47936e+07	3.83451e+07	3.02627e+07	2.21678e+07	3.90162e+07	3.03246e+07	4.3417e+07	3.458e+07	3.25145e+07	2.57802e+07	4.02002e+07	3.73997e+07	2.16676e+07	2.06091e+07	20562486
305POS		PE(14:0/22:6)+H	PE(36:6)+H	PE	(14:0/22:6)	(14:0)	(22:6)			C41 H71 O8 N1 P1	736.491	8.7094	0.018669	1.67795	0.0180148	0.234142	3.58024e+07	9.35554e+07	8.18565e+07	3.63894e+07	6.59103e+07	5.14122e+07	8.68168e+07	8.89468e+07	4.74091e+07	5.1127e+07	8.15005e+07	1.31235e+08	3.02557e+07	3.02698e+07	2.92947e+07
306POS		TG(16:0/8:0/18:2)+NH4	TG(42:2)+NH4	TG	(16:0/8:0/18:2)	(16:0)	(8:0)	(18:2)		C45 H86 O6 N1	736.645	15.6966	0.022173	2.80672	0.120456	0.305766	1.49312e+07	2.3083e+07	6.96219e+07	3.87355e+07	3.44124e+07	5.263e+06	1.15783e+08	2.36155e+08	4.35978e+07	2.2177e+07	3.78953e+07	8.82797e+07	3.57031e+07	3.56391e+07	3.43196e+07
307POS		PG(34:0e)+H	PG(34:0e)+H	PG	(34:0e)	(34:0e)				C40 H82 O9 N0 P1	737.569	14.1687	0.024764	1.93164	0.176037	0.0507641	1.4819e+06	2.70092e+06	3.43142e+06	2.34476e+06	2.54341e+06	400079	3.30854e+06	1.01656e+07	3.03908e+06	1.21318e+06	2.22703e+06	4.8138e+06	1.22864e+06	1.28313e+06	1.28264e+06
308POS		PE(34:2)+Na	PE(34:2)+Na	PE	(34:2)	(34:2)				C39 H74 O8 N1 P1 Na1	738.504	10.3155	0.00611929	0.846579	0.0631865	0.435277	1.18744e+08	9.85288e+07	1.27845e+08	1.44219e+08	1.32564e+08	1.33412e+08	1.40849e+08	1.21983e+08	149584695	1.68693e+08	1.33935e+08	9.50628e+07	2.5818e+08	2.5547e+08	2.55456e+08
309POS		PE(16:0/20:5)+H	PE(36:5)+H	PE	(16:0/20:5)	(16:0)	(20:5)			C41 H73 O8 N1 P1	738.507	9.42093	0.0125009	0.758316	0.126654	0.708658	4.24861e+08	3.15202e+08	2.66844e+08	2.74713e+08	5.72543e+08	3.96821e+08	3.69833e+08	2.82716e+08	3.83489e+08	332598143	6.60454e+08	3.77104e+08	2.07761e+08	2.07786e+08	203306859
30POS		AcCa(21:1)+H	AcCa(21:1)+H	AcCa	(21:1)	(21:1)				C28 H54 O4 N1	468.405	5.55921	0.0579204	0.728058	0.526162	0.0382607	1.56164e+06	1.66647e+06	936721	1.97328e+06	5.53734e+06	1.14074e+06	708361	611605	1.92946e+06	1.39072e+06	1.04658e+06	4.72049e+06	1.12696e+06	1.2445e+06	1.12801e+06
310POS		PE(16:1/18:1)+Na	PE(34:2)+Na	PE	(16:1/18:1)	(16:1)	(18:1)			C39 H74 O8 N1 P1 Na1	738.504	9.15478	0.0305425	0.96273	0.864648	0.389392	513294687	7.65092e+08	4.18929e+08	3.40831e+08	9.8868e+08	5.06193e+08	6.2361e+08	4.47386e+08	4.86627e+08	3.92823e+08	928929974	753894369	317736856	3.17699e+08	3.01201e+08
311POS		TG(16:0/8:0/18:1)+NH4	TG(42:1)+NH4	TG	(16:0/8:0/18:1)	(16:0)	(8:0)	(18:1)		C45 H88 O6 N1	738.661	16.811	0.0543267	3.27869	0.0566894	0.427005	2.44384e+07	4.89582e+07	1.26876e+08	4.74512e+07	4.44614e+07	1.1784e+07	201353891	2.97964e+08	5.15492e+07	3.37305e+07	4.07678e+07	1.07814e+08	6.64124e+07	6.6481e+07	6.03847e+07
312POS		PE(16:0/18:1)+Na	PE(34:1)+Na	PE	(16:0/18:1)	(16:0)	(18:1)			C39 H76 O8 N1 P1 Na1	740.52	10.1238	0.00505217	0.932055	0.285153	2.71253	8454631945	7630899376	6521785395	6235793101	8942773619	6740462673	6889971078	7544239036	7151333070	6860715168	7976789821	7194898227	5703657517	5663157167	5648293014
313POS		TG(16:0/12:0/14:0)+NH4	TG(42:0)+NH4	TG	(16:0/12:0/14:0)	(16:0)	(12:0)	(14:0)		C45 H90 O6 N1	740.676	18.0482	0.0137081	11.4779	0.0757559	0.320306	2.71538e+06	1.37012e+07	2.56076e+07	4.37424e+06	7.11658e+06	2.53322e+06	3.78331e+07	6.38404e+07	5.03688e+06	3.35755e+06	3.59429e+06	1.57146e+08	1.61135e+07	1.58954e+07	1.56777e+07
314POS		PE(16:0/20:3)+H	PE(36:3)+H	PE	(16:0/20:3)	(16:0)	(20:3)			C41 H77 O8 N1 P1	742.538	10.3735	0.293943	1.31099	0.217047	0.467451	1232823902	1941158173	1321785640	8.99141e+08	1881826696	1307768157	1788589474	1480940629	1337215054	2.76278e+08	2022935272	2189111226	390924364	6.20837e+08	3.79109e+08
315POS		LPC(32:0)+Na	LPC(32:0)+Na	LPC	(32:0)	(32:0)				C40 H82 O7 N1 P1 Na1	742.572	11.3528	0.0133631	1.41114	0.0325187	0.223613	8.8573e+07	176390973	1.56251e+08	9.00533e+07	9.93342e+07	9.17774e+07	1.54777e+08	1.2305e+08	89451420	1.02602e+08	8.81931e+07	8.5465e+07	1.51038e+08	1.47604e+08	1.47586e+08
316POS		TG(43:6)+NH4	TG(43:6)+NH4	TG	(43:6)	(43:6)				C46 H80 O6 N1	742.598	13.2201	0.0407036	1.9317	0.204068	0.0705335	2.05753e+06	3.30001e+06	8.27093e+06	2.5075e+06	6.33338e+06	195786	3.23366e+06	1.43297e+07	3.89616e+06	947897	3.32951e+06	7.5112e+06	2.03917e+06	2.03373e+06	2.1834e+06
317POS		PC(33:2)+H	PC(33:2)+H	PC	(33:2)	(33:2)				C41 H79 O8 N1 P1	744.554	9.45941	0.00865571	1.54697	0.506705	0.618304	9.22539e+07	9.09907e+08	1.4223e+08	9.45546e+07	1.79293e+08	1.56464e+08	1.56214e+08	8.67584e+08	1.37519e+08	1.37216e+08	881694388	1.22909e+08	5.75458e+08	583980339	5.75172e+08
318POS		PE(36:2)+H	PE(36:2)+H	PE	(36:2)	(36:2)				C41 H79 O8 N1 P1	744.554	11.2843	0.0136559	1.09519	0.538493	1.23356	4006840721	4136889297	5236230386	3984174907	7215266107	5560127319	6896344388	5530845442	4478256314	4144322552	7268011947	6696588743	4033149709	4032693753	3938278979
319POS		PC(33:2)+H	PC(33:2)+H	PC	(33:2)	(33:2)				C41 H79 O8 N1 P1	744.554	10.2507	0.0323963	0.601542	0.382633	0.382971	3.73476e+07	3.68921e+07	5.77664e+07	4.42954e+07	4.36649e+07	5.28881e+07	5.62363e+07	5.05767e+07	4.64762e+07	2.58785e+08	6.02989e+07	4.0918e+07	4.13366e+07	4.13452e+07	3.90638e+07
31POS		AcCa(21:1)+H	AcCa(21:1)+H	AcCa	(21:1)	(21:1)				C28 H54 O4 N1	468.405	4.52107	0.0815455	1.47475	0.172217	0.0401124	1.38957e+06	5.03768e+06	9.09066e+06	6.15082e+06	8.40238e+06	5.78639e+06	6.52025e+06	5.08574e+06	7.51703e+06	2.63549e+06	1.83383e+06	9.66789e+06	3.09099e+06	3.08797e+06	2.67275e+06
321POS		Co(Q8)+NH4	Co(Q8)+NH4	Co	(Q8)	(Q8)				C49 H78 O4 N1	744.593	13.9851	0.0237518	1.06167	0.757497	0.174621	142581087	1.03537e+08	2.13299e+08	9.72399e+07	2.32199e+08	154626910	1.84157e+08	1.74503e+08	1.65073e+08	1.35094e+08	257676982	2.63255e+08	9.73134e+07	9.35263e+07	9.33158e+07
322POS		PE(36:4p)+Na	PE(36:4p)+Na	PE	(16:0p/20:4)	(16:0p)	(20:4)			C41 H74 O7 N1 P1 Na1	746.51	10.6056	0.0223315	1.05932	0.434843	0.215026	7.90701e+07	8.94583e+07	9.51322e+07	7.53056e+07	7.29121e+07	7.07278e+07	9.13256e+07	8.04866e+07	7.24649e+07	7.67515e+07	8.56121e+07	6.23998e+07	9.82243e+07	9.45249e+07	9.45162e+07
323POS		PC(33:1)+H	PC(33:1)+H	PC	(33:1)	(33:1)				C41 H81 O8 N1 P1	746.569	10.3193	0.0109234	1.45624	0.00719522	0.96625	1125129050	2665584807	1873490548	1186099779	1515439444	1459558422	1981385483	2196435916	1364250273	1381806017	1616013605	1748280642	1344272636	1319890282	1318480366
326POS		TG(16:0/11:4/16:0)+NH4	TG(43:4)+NH4	TG	(16:0/11:4/16:0)	(16:0)	(11:4)	(16:0)		C46 H84 O6 N1	746.629	14.7439	0.0337549	0.416598	0.00515378	0.280065	2.61832e+07	8.14107e+06	1.22006e+07	2.71186e+07	2.85846e+07	2.64752e+06	6.97187e+06	1.6301e+07	4.27178e+07	1.68824e+07	2.58805e+07	2.34627e+07	9.60765e+06	9.08693e+06	9.04902e+06
327POS		PE(16:0p/22:6)+H	PE(38:6p)+H	PE	(16:0p/22:6)	(16:0p)	(22:6)			C43 H75 O7 N1 P1	748.528	10.2849	0.00721662	1.65361	0.000544459	0.80129	4.76711e+08	8.10891e+08	1106065882	5.31601e+08	5.83841e+08	6.24281e+08	911699507	8.44605e+08	4.71611e+08	468746257	5.51902e+08	802886859	467604193	4.6763e+08	461796159
328POS		PC(33:0)+H	PC(33:0)+H	PC	(33:0)	(33:0)				C41 H83 O8 N1 P1	748.585	11.0457	0.0200043	1.69374	0.0357462	0.482598	2.02506e+08	4.26959e+08	3.45786e+08	1.36697e+08	1.86269e+08	1.68996e+08	3.13918e+08	5.46971e+08	2.35962e+08	1.97306e+08	2.44633e+08	2.35575e+08	2.41363e+08	2.33383e+08	2.33008e+08
329POS		PE(36:0)+H	PE(36:0)+H	PE	(36:0)	(36:0)				C41 H83 O8 N1 P1	748.585	13.0578	0.0240035	1.30032	0.0953385	0.0633597	4.2589e+06	6.09751e+06	1.042e+07	6.26509e+06	9.49181e+06	8.42102e+06	6.86548e+06	7.73122e+06	5.53337e+06	6.32394e+06	6.86799e+06	10840532	4.43708e+06	4.44441e+06	4.25875e+06
32POS		AcCa(21:0)+H	AcCa(21:0)+H	AcCa	(21:0)	(21:0)				C28 H56 O4 N1	470.42	5.875	0.0405204	1.27425	0.44254	0.0166833	1.85782e+06	3.46e+06	1.21347e+07	8.78261e+06	7.23653e+06	4.35944e+06	7.53427e+06	6.54148e+06	1.0431e+07	3.72563e+06	2.61912e+06	1.01264e+07	3.84963e+06	3.85057e+06	3.58607e+06
330POS		PC(34:0e)+H	PC(34:0e)+H	PC	(34:0e)	(34:0e)				C42 H87 O7 N1 P1	748.621	12.3802	0.0225424	1.69153	0.0211833	0.467836	8.8774e+07	2.87418e+08	2.82665e+08	8.94704e+07	2.11758e+08	109967767	2.70425e+08	2.13858e+08	1.21366e+08	1.24605e+08	171702114	2.01874e+08	117604763	1.14386e+08	1.12484e+08
332POS		PC(32:3)+Na	PC(32:3)+Na	PC	(32:3)	(32:3)				C40 H74 O8 N1 P1 Na1	750.504	8.3837	0.0164732	2.93908	0.00180893	0.271405	7.39986e+06	4.54771e+07	3.08165e+07	4.03142e+06	1.90573e+07	1.76793e+07	4.34409e+07	4.2881e+07	2.18283e+07	7.90217e+06	1.96036e+07	5.43106e+07	1.19742e+07	1.1978e+07	1.16376e+07
333POS		PE(15:0/22:6)+H	PE(37:6)+H	PE	(15:0/22:6)	(15:0)	(22:6)			C42 H73 O8 N1 P1	750.507	9.26748	0.00909765	1.35959	0.0492746	0.219861	7.97875e+07	1.71755e+08	1.35513e+08	6.29526e+07	1.34739e+08	1.05001e+08	1.20786e+08	1.44304e+08	9.57605e+07	1.00691e+08	1.45453e+08	1.64748e+08	6.24808e+07	6.24564e+07	6.14896e+07
334POS		PE(16:0p/22:5)+H	PE(38:5p)+H	PE	(16:0p/22:5)	(16:0p)	(22:5)			C43 H77 O7 N1 P1	750.543	10.617	0.00875065	1.77584	0.00326334	0.980708	425022356	1101611530	1076900201	414001742	6.73707e+08	5.60239e+08	1092105510	8.61124e+08	438679696	4.3049e+08	7.44674e+08	8.60324e+08	4.2096e+08	4.16623e+08	4.13706e+08
335POS		TG(16:0/9:0/18:2)+NH4	TG(43:2)+NH4	TG	(16:0/9:0/18:2)	(16:0)	(9:0)	(18:2)		C46 H88 O6 N1	750.661	16.2781	0.0271037	0.894804	0.720902	0.116047	1.05744e+07	7.05137e+06	1.20729e+07	1.64458e+07	1.51424e+07	2.00104e+06	1.63133e+07	2.62767e+07	2.71908e+07	8.94249e+06	1.81969e+07	2.26268e+07	7.59629e+06	7.60517e+06	7.24949e+06
336POS		PC(34:5)+H	PC(34:5)+H	PC	(34:5)	(34:5)				C42 H75 O8 N1 P1	752.522	8.91198	0.0283937	1.25622	0.00420995	0.407632	2.64439e+08	3.92752e+08	422835708	2.66503e+08	3.44265e+08	4.04771e+08	3.69054e+08	4.33323e+08	3.55439e+08	3.19735e+08	3.25932e+08	3.34324e+08	3.07258e+08	307386629	2.92453e+08
337POS		PE(17:1/20:4)+H	PE(37:5)+H	PE	(17:1/20:4)	(17:1)	(20:4)			C42 H75 O8 N1 P1	752.522	9.68134	0.0149536	0.936587	0.73897	0.165074	3.48814e+07	6.06844e+07	2.76144e+07	2.33047e+07	4.88087e+07	2.63538e+07	3.05998e+07	3.73043e+07	3.68367e+07	3.38614e+07	5.90612e+07	3.91841e+07	2.1713e+07	2.22796e+07	2.17116e+07
338POS		PE(18:1p/20:3)+H	PE(38:4p)+H	PE	(18:1p/20:3)	(18:1p)	(20:3)			C43 H79 O7 N1 P1	752.559	11.4754	0.0289571	1.43672	0.0626776	0.730013	4.7165e+08	9.72756e+08	1426722068	5.20266e+08	1128346287	692599737	1157013720	1017720435	6.10989e+08	5.86742e+08	1002061728	9.39907e+08	464067763	4.64926e+08	4.41595e+08
339POS		PE(36:2e)+Na	PE(36:2e)+Na	PE	(36:2e)	(36:2e)				C41 H80 O7 N1 P1 Na1	752.556	12.6348	0.0315949	1.60651	0.0176907	0.0664954	3.44941e+06	9.92952e+06	8.47779e+06	5.7051e+06	6.50545e+06	4.64391e+06	9.65899e+06	7.92087e+06	4.34205e+06	3.68754e+06	4.94189e+06	5.3655e+06	4.22013e+06	3.99685e+06	3.99779e+06
33POS		LPE(16:0)+Na	LPE(16:0)+Na	LPE	(16:0)	(16:0)				C21 H44 O7 N1 P1 Na1	476.275	3.12801	0.0444526	1.33863	0.010958	0.139284	46779090	6.92233e+07	6.165e+07	3.492e+07	6.86917e+07	6.07235e+07	6.84821e+07	8.13913e+07	4.95454e+07	5.13291e+07	5.87763e+07	7.35599e+07	4.09224e+07	4.09099e+07	3.78447e+07
340POS		TG(16:0/9:0/18:1)+NH4	TG(43:1)+NH4	TG	(16:0/9:0/18:1)	(16:0)	(9:0)	(18:1)		C46 H90 O6 N1	752.676	17.414	0.0291323	1.55516	0.271284	0.0776411	6.15259e+06	5.45227e+06	9.6334e+06	8.70519e+06	6.55715e+06	775740	1.69688e+07	2.43066e+07	1.36643e+07	4.14911e+06	1.00339e+07	1.94737e+07	6.90883e+06	6.93048e+06	6.57678e+06
342POS		PE(37:4)+H	PE(37:4)+H	PE	(15:0/22:4)	(15:0)	(22:4)			C42 H77 O8 N1 P1	754.538	10.4933	0.0132982	1.06516	0.670204	0.383493	4.92945e+08	6.26772e+08	5.29276e+08	3.24412e+08	7.33966e+08	525579831	5.08991e+08	749662890	5.01681e+08	4.81789e+08	8.12705e+08	6.25333e+08	3.62743e+08	3.62952e+08	3.54556e+08
344POS		PE(38:4e)+H	PE(38:4e)+H	PE	(38:4e)	(38:4e)				C43 H81 O7 N1 P1	754.575	11.7285	0.19095	0.939297	0.702614	0.331629	1.61133e+08	1.45985e+08	1.28608e+08	174964076	2.1427e+08	1.06693e+08	2.10425e+08	1.39184e+08	1.38589e+08	1.6755e+08	7.28758e+07	1.4207e+08	1.01481e+08	1.30266e+08	9.05541e+07
345POS		PE(18:0p/20:3)+H	PE(38:3p)+H	PE	(18:0p/20:3)	(18:0p)	(20:3)			C43 H81 O7 N1 P1	754.575	12.0184	0.0175788	1.68878	0.0197972	0.209631	2.15148e+07	6.40784e+07	5.76738e+07	2.52751e+07	5.10323e+07	4.1116e+07	7.82548e+07	4.0424e+07	2.47972e+07	2.70363e+07	4.18925e+07	4.1936e+07	2.3473e+07	2.27979e+07	2.27497e+07
346POS		PG(34:6)+NH4	PG(34:6)+NH4	PG	(34:6)	(34:6)				C40 H71 O10 N1 P1	756.481	6.08149	0.0197101	1.16021	0.561369	0.0437032	3.43983e+06	3.06725e+06	6.02425e+06	1.61082e+06	5.21571e+06	6.20678e+06	3.1418e+06	2.25812e+06	4.27044e+06	2.20802e+06	6.12546e+06	5.8361e+06	2.25474e+06	2.33239e+06	2.33458e+06
348POS		PE(18:0p/20:2)+H	PE(38:2p)+H	PE	(18:0p/20:2)	(18:0p)	(20:2)			C43 H83 O7 N1 P1	756.59	12.8699	0.0150958	2.00415	0.0150855	0.191324	9.82748e+06	2.1504e+07	3.87134e+07	1.4657e+07	2.65207e+07	2.47344e+07	5.29908e+07	2.37729e+07	1.17553e+07	1.3081e+07	2.08704e+07	3.21095e+07	1.31717e+07	1.28471e+07	1.28209e+07
349POS		TG(6:0/16:0/22:6)+NH4	TG(44:6)+NH4	TG	(6:0/16:0/22:6)	(6:0)	(16:0)	(22:6)		C47 H82 O6 N1	756.614	13.723	0.0555711	2.80661	0.0502015	0.0899564	1.45138e+06	2.16189e+06	6.59168e+06	1.64389e+06	3.07543e+06	670536	6.28151e+06	1.20385e+07	3.21938e+06	923116	2.21056e+06	7.40511e+06	1.98786e+06	1.80904e+06	1.8071e+06
34POS		LPE(18:3)+H	LPE(18:3)+H	LPE	(18:3)	(18:3)				C23 H43 O7 N1 P1	476.277	2.194	0.015391	1.75696	0.0314807	0.0589125	1.22192e+06	3.045e+06	2.79643e+06	884161	3.13759e+06	4.3775e+06	4.13147e+06	5.73722e+06	2.24842e+06	1.68565e+06	4.2452e+06	3.49596e+06	1.65172e+06	1.65306e+06	1.60874e+06
350POS		CerG1(d18:1/20:0)+H	CerG1(d38:1)+H	CerG1	(d18:1/20:0)	(d18:1)	(20:0)			C44 H86 O8 N1	756.635	12.1406	0.0491761	1.00306	0.989094	0.0737589	1.92881e+07	3.14207e+07	2.6303e+07	1.7473e+07	5.17409e+07	2.85745e+07	2.85566e+07	2.81157e+07	2.47389e+07	1.94852e+07	4.80291e+07	3.83381e+07	1.8691e+07	1.87634e+07	1.71774e+07
351POS		SM(d38:2)+H	SM(d38:2)+H	SM	(d38:2)	(d38:2)				C43 H86 O6 N2 P1	757.622	10.9034	0.021753	1.17947	0.142544	0.0906021	4.34074e+07	6.08133e+07	5.1174e+07	3.74311e+07	5.28033e+07	4.26589e+07	5.74742e+07	37419799	3.65789e+07	3.48488e+07	5.12734e+07	5.28096e+07	3.59448e+07	3.44793e+07	3.48419e+07
352POS		PC(34:2)+H	PC(34:2)+H	PC	(34:2)	(34:2)				C42 H81 O8 N1 P1	758.569	10.4212	0.0159577	1.29805	0.350367	2.04211	1742450692	1652222736	2266029951	1928476865	2807661801	6094652673	2499863973	2321241192	2104820028	2046144666	2733867562	2512382079	2027776730	1980501306	1967331794
353POS		PC(34:2)+H	PC(34:2)+H	PC	(16:0/18:2)	(16:0)	(18:2)			C42 H81 O8 N1 P1	758.569	10.7673	0.0328437	0.889192	0.370108	0.833236	6.00465e+08	4.68903e+08	6.26937e+08	561949088	927258012	6.92681e+08	7.92838e+08	6.508e+08	6.8201e+08	6.68921e+08	1013443152	7.28342e+08	4.9857e+08	497950244	4.70448e+08
354POS		PC(34:2)+H	PC(34:2)+H	PC	(16:0/18:2)	(16:0)	(18:2)			C42 H81 O8 N1 P1	758.569	10.0007	0.0182166	1.01257	0.669801	6.42666	48736083331	49283092655	53505826681	47281285582	52227116605	52620933958	53111638310	45763117856	50635853628	51330942021	49759981436	49458732151	51318913920	49735603472	51357543252
355POS		PE(37:2)+H	PE(37:2)+H	PE	(37:2)	(37:2)				C42 H81 O8 N1 P1	758.569	9.99414	0.0513697	0.0857774	0.336471	0.666101	9.62343e+08	1.42507e+07	9.71275e+06	1.04543e+07	1.13864e+07	1.34646e+07	1.60659e+07	1.65414e+07	1.469e+07	3.48912e+07	1.1131e+07	1.9593e+07	1.46156e+07	1.34632e+07	1.3324e+07
356POS		PC(35:1p)+H	PC(35:1p)+H	PC	(35:1p)	(35:1p)				C43 H85 O7 N1 P1	758.606	13.05	0.0324234	1.35181	0.109672	0.0919067	1.02337e+07	1.9244e+07	2.68661e+07	1.08419e+07	2.55577e+07	1.84647e+07	2.15175e+07	1.34992e+07	1.19793e+07	1.37236e+07	1.82539e+07	2.28695e+07	1.115e+07	1.05569e+07	1.05365e+07
357POS		TG(16:0/10:3/18:2)+NH4	TG(44:5)+NH4	TG	(16:0/10:3/18:2)	(16:0)	(10:3)	(18:2)		C47 H84 O6 N1	758.629	14.8378	0.0202408	0.871427	0.618498	0.0764251	6.4534e+06	7.21325e+06	7.53052e+06	3.91568e+06	1.39964e+07	2.83961e+06	6.39656e+06	1.07239e+07	9.38929e+06	5.1575e+06	1.40503e+07	1.14492e+07	3.39324e+06	3.27684e+06	3.27716e+06
358POS		SM(d38:1)+H	SM(d38:1)+H	SM	(d38:1)	(d38:1)				C43 H88 O6 N2 P1	759.637	11.8052	0.015757	0.877769	0.22938	1.00607	9.23824e+08	7.75706e+08	821014999	7.41955e+08	1178452127	745142422	7.2345e+08	7.71592e+08	7.60373e+08	7.71535e+08	1116575804	9.8443e+08	7.49273e+08	7.35618e+08	7.26174e+08
359POS		PC(34:1)+H	PC(34:1)+H	PC	(16:0/18:1)	(16:0)	(18:1)			C42 H83 O8 N1 P1	760.585	11.0533	0.0282489	1.27801	0.763884	0.300355	2198430009	4.80132e+08	3.61749e+08	258953571	6.16675e+08	3.31568e+08	4.20965e+08	5089654629	2.84149e+08	2094035303	2.95179e+08	6.61197e+08	3.23187e+08	3.076e+08	3.23128e+08
35POS		LPE(18:2)+H	LPE(18:2)+H	LPE	(18:2)	(18:2)				C23 H45 O7 N1 P1	478.293	2.5014	0.00885255	1.492	0.0313155	0.291173	6.90258e+07	1.15767e+08	1.41854e+08	5.22088e+07	1.43494e+08	1.38916e+08	1.30995e+08	1.75006e+08	8.69173e+07	7.70898e+07	1.52277e+08	1.6433e+08	6.19832e+07	6.29365e+07	6.19794e+07
360POS		PC(34:1)+H	PC(34:1)+H	PC	(16:0/18:1)	(16:0)	(18:1)			C42 H83 O8 N1 P1	760.585	10.7661	0.0161865	0.991838	0.859185	4.78107	27167123545	33179256632	26469639990	29643113298	31244663215	26130142858	30006370999	28901854062	28645163512	28496835114	27342209234	26443509849	31943471461	31068335111	31060403533
361POS		PC(35:0p)+H	PC(35:0p)+H	PC	(35:0p)	(35:0p)				C43 H87 O7 N1 P1	760.621	13.9743	0.0377368	1.74963	0.0476522	0.0686525	2.39807e+06	1.41104e+07	1.29945e+07	1.14584e+07	7.75431e+06	6.16603e+06	1.0588e+07	5.99847e+06	3.5052e+06	4.71013e+06	5.21735e+06	1.14558e+07	3.78216e+06	3.78426e+06	3.54121e+06
362POS		TG(16:0/8:0/20:4)+NH4	TG(44:4)+NH4	TG	(16:0/8:0/20:4)	(16:0)	(8:0)	(20:4)		C47 H86 O6 N1	760.645	15.3313	0.0519685	1.60179	0.216613	0.0828556	7.11636e+06	7.16477e+06	1.38829e+07	1.05141e+07	1.14339e+07	1.53826e+06	2.25894e+07	3.18634e+07	1.19839e+07	7.07921e+06	1.16433e+07	1.87014e+07	7.31482e+06	7.32666e+06	6.68106e+06
363POS		SM(d38:0)+H	SM(d38:0)+H	SM	(d38:0)	(d38:0)				C43 H90 O6 N2 P1	761.653	12.1793	0.0325714	0.480349	0.0948858	0.372706	2.3618e+07	2.67716e+07	3.20336e+07	7.7227e+07	1.65984e+08	5.90447e+07	2.6246e+07	34033012	6.09387e+07	8.52674e+07	3.70782e+07	3.80829e+07	3.92489e+07	3.71974e+07	3.70407e+07
364POS		PE(16:0/20:4)+Na	PE(36:4)+Na	PE	(16:0/20:4)	(16:0)	(20:4)			C41 H74 O8 N1 P1 Na1	762.504	9.10532	0.0291158	1.05763	0.750012	0.19173	9.22838e+07	8.75125e+07	1.27731e+08	8.43206e+07	1.45608e+08	1.06699e+08	9.40111e+07	1.15269e+08	1.00507e+08	9.60826e+07	1.62356e+08	1.8919e+08	6.00582e+07	5.71923e+07	5.70674e+07
365POS		PC(34:0)+H	PC(34:0)+H	PC	(18:0/16:0)	(18:0)	(16:0)			C42 H85 O8 N1 P1	762.601	11.6654	0.020678	1.27693	0.0637817	0.973743	1746213353	2860415052	3372488607	1663485957	3078829693	2078976147	2919224915	2988728864	1970097350	2036212322	2529919227	2411828989	2089513516	2093128840	2017368986
366POS		TG(16:0/10:1/18:2)+NH4	TG(44:3)+NH4	TG	(16:0/10:1/18:2)	(16:0)	(10:1)	(18:2)		C47 H88 O6 N1	762.661	16.1855	0.0203816	5.12056	0.0244383	0.356535	4.98268e+06	1.5367e+07	5.77084e+07	4.11014e+06	2.82598e+07	4.74957e+06	8.506e+07	1.16884e+08	1.36278e+07	5.51601e+06	1.17626e+07	6.97552e+07	2.04612e+07	2.0508e+07	1.9771e+07
367POS		TG(16:0/10:1/18:2)+NH4	TG(44:3)+NH4	TG	(16:0/10:1/18:2)	(16:0)	(10:1)	(18:2)		C47 H88 O6 N1	762.661	15.7888	0.0375069	4.09314	0.0654969	0.298253	5.5364e+06	1.61355e+07	3.65517e+07	1.02126e+07	12993211	2.09695e+06	1.35812e+08	8.85367e+07	2.28208e+07	1.88428e+07	1.14648e+07	5.59749e+07	1.68706e+07	1.58234e+07	1.58168e+07
368POS		PG(36:0p)+H	PG(36:0p)+H	PG	(36:0p)	(36:0p)				C42 H84 O9 N0 P1	763.585	14.829	0.035641	0.624671	0.0847864	0.127911	7.09942e+06	5.87992e+06	5.76131e+06	6.39755e+06	1.54591e+07	4.12123e+06	4.53982e+06	1.02131e+07	1.17731e+07	6.64214e+06	1.58289e+07	8.96399e+06	1.92172e+06	1.80195e+06	1.91378e+06
369POS		PE(16:0/22:6)+H	PE(38:6)+H	PE	(16:0/22:6)	(16:0)	(22:6)			C43 H75 O8 N1 P1	764.522	10.3735	0.00358968	0.963353	0.477897	0.390222	1.71222e+08	1.75631e+08	1.435e+08	1.55443e+08	1.91269e+08	1.72445e+08	1.66403e+08	1.48662e+08	1.56383e+08	1.60349e+08	1.84331e+08	1.75015e+08	1.87122e+08	188280986	1.87108e+08
36POS		LPE(18:1)+H	LPE(18:1)+H	LPE	(18:1)	(18:1)				C23 H47 O7 N1 P1	480.308	3.27493	0.0117192	1.36227	0.0934065	0.283575	1.96647e+08	3.95007e+08	2.6128e+08	1.2914e+08	3.46321e+08	2.63237e+08	232397282	3.48581e+08	2.38805e+08	1.84405e+08	3.09868e+08	4.13741e+08	1.61121e+08	1.6424e+08	1.60804e+08
370POS		PE(16:0/22:6)+H	PE(38:6)+H	PE	(16:0/22:6)	(16:0)	(22:6)			C43 H75 O8 N1 P1	764.522	9.857	0.0511904	1.2005	0.188541	0.349383	3.9622e+08	4.39941e+08	4.19991e+08	1.21632e+08	3.99162e+08	5.02492e+08	379648506	4.30634e+08	3.97352e+08	4.16528e+08	3.91998e+08	3.75818e+08	3.96218e+08	3.60811e+08	3.9319e+08
371POS		PE(18:1/18:2)+Na	PE(36:3)+Na	PE	(18:1/18:2)	(18:1)	(18:2)			C41 H76 O8 N1 P1 Na1	764.52	9.84537	0.0198968	1.00637	0.877076	2.67237	8415537840	8439578086	9905044337	8432584014	10066987213	8671095635	8590214706	8546329263	8424441468	8573812829	8472234322	8567173574	8455215625	8458922521	8168946572
372POS		PE(18:1/18:2)+Na	PE(36:3)+Na	PE	(18:1/18:2)	(18:1)	(18:2)			C41 H76 O8 N1 P1 Na1	764.52	9.36386	0.0288662	0.78175	0.256036	0.671346	3.86056e+08	342716996	3.47429e+08	2.34685e+08	6.54138e+08	369119340	3.84793e+08	3.34147e+08	4.31043e+08	4.37753e+08	8.0969e+08	5.30589e+08	2.16234e+08	2.16224e+08	2.05595e+08
373POS		TG(16:0/10:1/18:1)+NH4	TG(44:2)+NH4	TG	(16:0/10:1/18:1)	(16:0)	(10:1)	(18:1)		C47 H90 O6 N1	764.676	17.218	0.0225438	6.8616	0.0202331	0.334175	7.22312e+06	2.76095e+07	3.82333e+07	2.05276e+06	1.40703e+07	2.32166e+06	6.77039e+07	1.04565e+08	7.73355e+06	2.62025e+06	7.27654e+06	4.0731e+07	1.28539e+07	1.28725e+07	1.23676e+07
374POS		TG(16:0/10:0/18:2)+NH4	TG(44:2)+NH4	TG	(16:0/10:0/18:2)	(16:0)	(10:0)	(18:2)		C47 H90 O6 N1	764.676	16.9169	0.017421	4.57413	0.0201859	0.926605	4.85553e+07	1.49393e+08	3.46435e+08	6.09749e+07	1.39946e+08	2.5582e+07	637131838	7.17143e+08	1.24237e+08	6.56985e+07	1.0586e+08	6.18459e+08	1.28939e+08	1.27453e+08	1.24586e+08
375POS		PG(36:0e)+H	PG(36:0e)+H	PG	(36:0e)	(36:0e)				C42 H86 O9 N0 P1	765.6	15.307	0.00968661	1.07922	0.789022	0.0980845	1.5257e+07	1.506e+07	2.20039e+07	2.7939e+07	2.3169e+07	3.361e+06	4.06204e+07	4.40766e+07	2.62526e+07	1.98271e+07	2.43661e+07	2.25273e+07	1.02853e+07	1.0116e+07	1.01134e+07
376POS		PC(35:5)+H	PC(35:5)+H	PC	(35:5)	(35:5)				C43 H77 O8 N1 P1	766.538	10.4604	0.0148337	1.08317	0.502719	0.677314	1263200949	1713058527	1265061004	1169378877	2016507213	1467333958	1532738855	1859622425	1222240480	1176026965	1794548674	1522839697	1069417333	1070147796	1042537620
377POS		PC(35:5)+H	PC(35:5)+H	PC	(35:5)	(35:5)				C43 H77 O8 N1 P1	766.538	10.1863	0.00543537	0.884656	0.212088	2.49601	5701265891	6250819589	4473894547	4218976118	6514318474	4739429550	5184701911	4359676076	5627122648	5489636208	7087228102	5634687941	4104877592	4066951591	4066013395
378POS		PE(36:2)+Na	PE(36:2)+Na	PE	(36:2)	(36:2)				C41 H78 O8 N1 P1 Na1	766.536	11.2843	0.0151553	0.845384	0.0019514	0.585996	2.39588e+08	1.9165e+08	2.00177e+08	2.49522e+08	2.61926e+08	2.43386e+08	2.36655e+08	2.15469e+08	2.54656e+08	2.56982e+08	256684042	1.97103e+08	3.64114e+08	3.54701e+08	354739687
379POS		PC(36:4p)+H	PC(36:4p)+H	PC	(36:4p)	(36:4p)				C44 H81 O7 N1 P1	766.575	10.2945	0.0117018	1.79917	0.00174373	0.668913	2.26281e+08	4.96632e+08	7.02322e+08	3.00824e+08	2.82866e+08	355798543	576603913	5.42085e+08	3.02844e+08	2.80735e+08	3.07493e+08	3.87016e+08	2.97733e+08	2.91877e+08	2.91686e+08
37POS		LPE(18:0)+H	LPE(18:0)+H	LPE	(18:0)	(18:0)				C23 H49 O7 N1 P1	482.324	4.39418	0.0130712	1.22875	0.275593	0.328199	1266235257	1596783664	1941635333	9.69196e+08	2645578333	1535354237	1655708552	2558508275	1474039776	1136830218	2021492621	2401584042	9.29377e+08	929303301	9.08457e+08
380POS		PC(16:0p/20:4)+H	PC(36:4p)+H	PC	(16:0p/20:4)	(16:0p)	(20:4)			C44 H81 O7 N1 P1	766.575	12.0256	0.0441951	1.54275	0.0101084	0.0953965	6.34597e+06	1.30861e+07	1.52424e+07	5.92309e+06	1.31151e+07	9.38079e+06	1.44401e+07	1.46003e+07	9.23348e+06	8.11201e+06	1.14009e+07	1.67604e+07	7.77903e+06	7.1207e+06	7444959
382POS		PE(18:0/18:1)+Na	PE(36:1)+Na	PE	(18:0/18:1)	(18:0)	(18:1)			C41 H80 O8 N1 P1 Na1	768.551	11.1284	0.0147998	10.6469	0.333962	2.40044	1.37865e+08	12962340885	289967810	1.45149e+08	3.13937e+08	1.85954e+08	2.13035e+08	3.07929e+08	2.73549e+08	252411173	2.14447e+08	2.79541e+08	1.79211e+08	1.84518e+08	1.82689e+08
383POS		PC(35:4)+H	PC(35:4)+H	PC	(15:0/20:4)	(15:0)	(20:4)			C43 H79 O8 N1 P1	768.554	9.28142	0.0157879	1.39617	0.0431026	0.594525	6.07978e+08	1193376788	8.59968e+08	3.99958e+08	9.68725e+08	6.9169e+08	8.33211e+08	1117477922	6.94354e+08	5.53903e+08	891705351	1051785561	4.61509e+08	4.4977e+08	4.48548e+08
384POS		PC(35:4)+H	PC(35:4)+H	PC	(35:4)	(35:4)				C43 H79 O8 N1 P1	768.554	8.7545	0.0193628	0.801568	0.37085	0.245885	5.91561e+07	5.62216e+07	5.60803e+07	3.91917e+07	1.0102e+08	7.83166e+07	6.56764e+07	5.54894e+07	6.57717e+07	7.17747e+07	1.54279e+08	8.19403e+07	3.48588e+07	3.4847e+07	3.3697e+07
385POS		PE(18:0/18:1)+Na	PE(36:1)+Na	PE	(18:0/18:1)	(18:0)	(18:1)			C41 H80 O8 N1 P1 Na1	768.551	12.0586	0.0100396	1.51866	0.0178476	0.292044	7.12613e+07	1.86077e+08	1.25571e+08	6.57974e+07	1.29041e+08	9.03942e+07	1.34926e+08	1.38842e+08	7.66182e+07	7.92472e+07	1.04101e+08	123104413	7.56622e+07	7.42298e+07	7.5353e+07
386POS		PC(16:0p/18:0)+Na	PC(34:0p)+Na	PC	(16:0p/18:0)	(16:0p)	(18:0)			C42 H84 O7 N1 P1 Na1	768.588	11.3774	0.00959504	1.52267	0.0156517	0.408209	1.60339e+08	4.10219e+08	3.03064e+08	158408091	211656430	1.92874e+08	3.07343e+08	2.68016e+08	1.83537e+08	1.89145e+08	2.08507e+08	2.11074e+08	2.33951e+08	2.30142e+08	230070727
388POS		PC(36:4e)+H	PC(36:4e)+H	PC	(36:4e)	(36:4e)				C44 H83 O7 N1 P1	768.59	11.562	0.179437	0.619058	0.450337	0.18347	8.25247e+06	4.59964e+07	1.62063e+07	6.26396e+06	1.34261e+08	1.20893e+07	2.12381e+07	1.51783e+07	6.68035e+07	9.64681e+06	1.18975e+08	1.02373e+08	2.01358e+07	1.98235e+07	2.6901e+07
389POS		TG(16:0/14:0/14:0)+NH4	TG(44:0)+NH4	TG	(16:0/14:0/14:0)	(16:0)	(14:0)	(14:0)		C47 H94 O6 N1	768.708	19.4339	0.0227857	6.49269	0.0158815	0.478239	1.468e+07	5.99268e+07	8.01008e+07	1.76146e+07	2.1066e+07	7.24496e+06	1.01523e+08	1.58209e+08	2.02871e+07	9.66506e+06	1.27501e+07	2.16701e+08	7.19579e+07	7.20674e+07	6.92091e+07
38POS		LPC(15:0)+H	LPC(15:0)+H	LPC	(15:0)	(15:0)				C23 H49 O7 N1 P1	482.324	2.5621	0.0149892	1.78421	0.00595885	0.276376	2.89018e+07	8.12215e+07	7.43175e+07	2.03339e+07	6.21107e+07	6.00195e+07	4.76452e+07	8.87601e+07	4.21715e+07	3.18174e+07	5.5779e+07	7.82356e+07	3.15679e+07	3.21573e+07	3.12187e+07
390POS		PC(35:3)+H	PC(35:3)+H	PC	(35:3)	(35:3)				C43 H81 O8 N1 P1	770.569	9.60042	0.0218642	0.910366	0.430311	0.742654	5.45645e+08	5.77004e+08	4.9911e+08	4.42284e+08	5.66317e+08	5.77251e+08	5.18605e+08	5.61868e+08	5.08563e+08	6.25717e+08	8.8865e+08	5.22703e+08	3.79973e+08	3.79906e+08	3.65731e+08
391POS		PE(18:0/18:0)+Na	PE(36:0)+Na	PE	(18:0/18:0)	(18:0)	(18:0)			C41 H82 O8 N1 P1 Na1	770.567	11.5037	0.0200178	1.16738	0.323651	0.336473	1089308062	1511193171	1259925497	8.68575e+08	1943344365	1199320638	1433471088	1127499507	9.42207e+08	8.94114e+08	1313948116	1700361618	7.39628e+08	7.40716e+08	7.14819e+08
392POS		PC(36:2p)+H	PC(36:2p)+H	PC	(36:2p)	(36:2p)				C44 H85 O7 N1 P1	770.606	10.6578	0.0181722	1.99946	0.0228956	0.724898	1.27003e+08	6.44215e+08	4.62036e+08	1.21238e+08	3.10275e+08	209205028	5.18191e+08	3.47619e+08	1.74297e+08	1.83201e+08	3.03999e+08	2.58101e+08	2.01482e+08	1.9557e+08	1.95008e+08
393POS		PC(34:0e)+Na	PC(34:0e)+Na	PC	(34:0e)	(34:0e)				C42 H86 O7 N1 P1 Na1	770.603	12.3802	0.0287363	1.41337	0.124542	0.199009	2.40225e+07	8.41875e+07	6.80672e+07	3.11669e+07	6.34796e+07	2.85877e+07	5.96169e+07	5.31756e+07	3.08476e+07	3.82152e+07	5.31089e+07	4.67611e+07	2.99172e+07	2.99521e+07	2.84693e+07
394POS		LPC(34:0)+Na	LPC(34:0)+Na	LPC	(34:0)	(34:0)				C42 H86 O7 N1 P1 Na1	770.603	12.606	0.0474932	1.34365	0.174247	0.0688877	4.62975e+06	1.28974e+07	1.04632e+07	5.2124e+06	8.98845e+06	3.80839e+06	9.66031e+06	7.23822e+06	4.74001e+06	6.18642e+06	8.82883e+06	7.77831e+06	2.10835e+07	1.94574e+07	1.94218e+07
395POS		TG(45:6)+NH4	TG(45:6)+NH4	TG	(45:6)	(45:6)				C48 H84 O6 N1	770.629	14.252	0.0205655	0.534967	0.0772211	0.188107	1.41007e+07	5.04553e+06	1.32758e+07	2.13029e+07	1.71315e+07	1.32246e+06	4.81816e+06	9.20168e+06	2.83334e+07	9.13854e+06	1.45708e+07	2.22821e+07	6.33677e+06	6.33636e+06	6.1135e+06
396POS		CerG1(d18:1/21:0)+H	CerG1(d39:1)+H	CerG1	(d18:1/21:0)	(d18:1)	(21:0)			C45 H88 O8 N1	770.65	12.6726	0.122794	1.22939	0.275155	0.0216933	9.35797e+06	8.14093e+06	9.46889e+06	2.87046e+06	7.88259e+06	5.41302e+06	7.36283e+06	7.92585e+06	7.20103e+06	4.11936e+06	8.79594e+06	1.11438e+07	9.80489e+06	7.98807e+06	7.96905e+06
397POS		SM(d38:3+pO)+H	SM(d38:3+pO)+H	SM	(d38:3+pO)	(d38:3+pO)				C43 H84 O7 N2 P1	771.601	13.939	0.0478492	1.00189	0.988364	0.0711978	1.62198e+07	1.11544e+07	1.29565e+07	7.25481e+06	1.60226e+07	1.33808e+07	1.28942e+07	1.09917e+07	1.2354e+07	8.97873e+06	1.2176e+07	1.17663e+07	2.25225e+07	2.07675e+07	2.07401e+07
398POS		CerG1(d38:2)+NH4	CerG1(d38:2)+NH4	CerG1	(d38:2)	(d38:2)				C44 H87 O8 N2	771.646	18.0869	0.0205306	2.52887	0.0144996	0.225884	1.40227e+07	3.51566e+07	4.89032e+07	2.4249e+07	1.42545e+07	9.98661e+06	5.55508e+07	7.80699e+07	2.49469e+07	1.7893e+07	1.42218e+07	4.9466e+07	5.97708e+07	5.97848e+07	5.76771e+07
399POS		SM(d18:1/21:1)+H	SM(d39:2)+H	SM	(d18:1/21:1)	(d18:1)	(21:1)			C44 H88 O6 N2 P1	771.637	13.0034	0.0366376	1.89416	0.0187782	0.101168	2.9721e+06	7.36027e+06	7.74084e+06	2.39135e+06	1.07747e+07	6.92914e+06	9.19573e+06	8.98101e+06	3.36552e+06	2.53442e+06	4.84862e+06	1.07209e+07	3.15596e+06	2.95058e+06	3.13433e+06
3POS		So(d18:0)+H	So(d18:0)+H	So	(d18:0)	(d18:0)				C18 H40 O2 N1	302.305	2.97623	0.0250252	1.82306	0.0368552	0.182098	1.33073e+07	2.01588e+07	3.56281e+07	1.16019e+07	3.77378e+07	2.88688e+07	5.25619e+07	2.61528e+07	1.57554e+07	1.1259e+07	1.76177e+07	3.22058e+07	1.95383e+07	1.87135e+07	1.87169e+07
400POS		PS(36:2p)+H	PS(36:2p)+H	PS	(36:2p)	(36:2p)				C42 H79 O9 N1 P1	772.549	8.411	0.0191155	1.80144	0.0325755	0.288056	2.90454e+07	4.16852e+07	1.02735e+08	2.47131e+07	8.8519e+07	5.84448e+07	1.01536e+08	9.7096e+07	4.75088e+07	2.83667e+07	6.33979e+07	1.05702e+08	3.46467e+07	3.46626e+07	3.35199e+07
401POS		PC(35:2)+H	PC(35:2)+H	PC	(35:2)	(35:2)				C43 H83 O8 N1 P1	772.585	10.3673	0.00940632	0.850891	0.475791	1.23932	1520195250	1791943606	1468028178	1139770613	1712026563	2510587447	1557015243	1854074376	2947602740	1692969620	3648525284	1591557434	1454807183	1455036403	1431346752
402POS		PC(36:2e)+H	PC(36:2e)+H	PC	(36:2e)	(36:2e)				C44 H87 O7 N1 P1	772.621	11.6695	0.0221918	2.04626	0.0040253	0.767294	1.33917e+08	4.77783e+08	5.27013e+08	1.25961e+08	3.39545e+08	2.3349e+08	4.60008e+08	3.51938e+08	1.57702e+08	1.59166e+08	2.77826e+08	393236065	1.58009e+08	1.52592e+08	1.51686e+08
403POS		PC(36:2e)+H	PC(36:2e)+H	PC	(36:2e)	(36:2e)				C44 H87 O7 N1 P1	772.621	13.9603	0.0177986	1.22447	0.186503	0.197378	1.55954e+08	1.30623e+08	2.08373e+08	8.62739e+07	2.15124e+08	1.80006e+08	1.84823e+08	1.5454e+08	1.46511e+08	9.37592e+07	1.62957e+08	1.95384e+08	1.00301e+08	9.74059e+07	9.7153e+07
404POS		TG(16:0/11:4/18:1)+NH4	TG(45:5)+NH4	TG	(16:0/11:4/18:1)	(16:0)	(11:4)	(18:1)		C48 H86 O6 N1	772.645	14.7671	0.104616	0.655379	0.152455	0.10437	5.63569e+06	3.27166e+06	2.8448e+06	5.25411e+06	5.92069e+06	519663	2.71701e+06	5.67441e+06	8.75814e+06	3.6559e+06	6.736e+06	8.54023e+06	1.70469e+06	1.42016e+06	1.7203e+06
405POS		SM(d39:1)+H	SM(d39:1)+H	SM	(d39:1)	(d39:1)				C44 H90 O6 N2 P1	773.653	12.3008	0.0190324	0.911902	0.673203	0.375437	2.05767e+08	1.55431e+08	1.73663e+08	132887849	2.46253e+08	1.46289e+08	1.26795e+08	2.18429e+08	2.13411e+08	207684545	3.07854e+08	3.77504e+08	1.3591e+08	1.35292e+08	1.31211e+08
406POS		PE(38:1)+H	PE(38:1)+H	PE	(38:1)	(38:1)				C43 H85 O8 N1 P1	774.601	13.0529	0.0198277	1.16703	0.262478	0.129682	4.98828e+07	7.21509e+07	8.77081e+07	4.34688e+07	8.51699e+07	4.7999e+07	6.98911e+07	6.13009e+07	5.24303e+07	5.86147e+07	6.91586e+07	7.95926e+07	3.89944e+07	3.90267e+07	3.76863e+07
407POS		PC(35:1)+H	PC(35:1)+H	PC	(35:1)	(35:1)				C43 H85 O8 N1 P1	774.601	11.2741	0.0179892	1.46719	0.0139	0.830088	9.97333e+08	2225770469	1446443150	9.11996e+08	1172527452	1173610824	1486767094	2069092244	1172758104	1144361940	1413917161	1594113513	1094660185	1096292042	1061723147
408POS		PC(36:1e)+H	PC(36:1e)+H	PC	(36:1e)	(36:1e)				C44 H89 O7 N1 P1	774.637	12.4174	0.0156021	2.66531	0.00630369	0.419646	1.75708e+07	1.29487e+08	1.27797e+08	2.44319e+07	7.08022e+07	39357497	1.08471e+08	8.32284e+07	2.70911e+07	2.46441e+07	4.33643e+07	6.57895e+07	2.67346e+07	2.67493e+07	2.60259e+07
409POS		PC(36:1e)+H	PC(36:1e)+H	PC	(36:1e)	(36:1e)				C44 H89 O7 N1 P1	774.637	12.679	0.13803	2.08102	0.01832	0.122967	1.89132e+06	1.33417e+07	1.46761e+07	2.61282e+06	1.02719e+07	5.17295e+06	1.17482e+07	8.2807e+06	4.57396e+06	3.78282e+06	6.83015e+06	9.1341e+06	4.50293e+06	3.58392e+06	3.56509e+06
40POS		LPC(16:0e)+H	LPC(16:0e)+H	LPC	(16:0e)	(16:0e)				C24 H53 O6 N1 P1	482.361	3.47149	0.0155271	1.90191	0.00334272	0.347634	3.09833e+07	8.04083e+07	8.43411e+07	2.65528e+07	6.265e+07	1.19833e+08	6.57797e+07	6.37395e+07	3.96343e+07	4.05989e+07	5.89253e+07	7.91471e+07	3.66172e+07	3.69972e+07	3.58824e+07
410POS		TG(23:0/11:2/11:2)+NH4	TG(45:4)+NH4	TG	(23:0/11:2/11:2)	(23:0)	(11:2)	(11:2)		C48 H88 O6 N1	774.661	14.702	0.0351604	0.562804	0.0744831	0.129961	8.84017e+06	2.70632e+06	4.54867e+06	8.47368e+06	6.89115e+06	767693	2.51429e+06	1.12674e+07	1.21719e+07	5.69077e+06	6.54274e+06	5.55373e+06	2.95677e+06	2.78492e+06	2.78256e+06
411POS		PC(36:7)+H	PC(36:7)+H	PC	(36:7)	(36:7)				C44 H75 O8 N1 P1	776.522	8.29221	0.0160864	1.53664	0.0753081	0.183595	1.72361e+07	4.69166e+07	7.56206e+07	3.59373e+07	5.99392e+07	5.67963e+07	7.11915e+07	5.81959e+07	3.62125e+07	2.90857e+07	8.27978e+07	9.26627e+07	2.61183e+07	2.61097e+07	2.53931e+07
412POS		PC(14:0/20:4)+Na	PC(34:4)+Na	PC	(14:0/20:4)	(14:0)	(20:4)			C42 H76 O8 N1 P1 Na1	776.52	8.72038	0.00539111	1.27411	0.0818369	0.114923	5.05436e+07	9.39192e+07	8.11286e+07	4.59135e+07	6.43681e+07	6.98089e+07	6.83174e+07	9.86826e+07	9.64956e+07	5.69064e+07	6.73005e+07	7.42511e+07	1.00922e+08	1.01865e+08	1.00917e+08
413POS		PC(22:5/14:2)+H	PC(36:7)+H	PC	(22:5/14:2)	(22:5)	(14:2)			C44 H75 O8 N1 P1	776.522	10.575	0.0532979	0.663519	0.00182919	0.267697	3.65702e+07	2.55407e+07	1.90733e+07	3.07931e+07	3.43633e+07	2.71954e+07	1.79844e+07	3.42553e+07	3.69579e+07	3.83368e+07	4.20575e+07	2.13139e+07	3.07253e+07	3.37154e+07	3.37789e+07
414POS		PE(18:1p/22:5)+H	PE(40:6p)+H	PE	(18:1p/22:5)	(18:1p)	(22:5)			C45 H79 O7 N1 P1	776.559	11.2595	0.0103141	1.28901	0.0307494	0.39235	2.68558e+08	3.72703e+08	5.69114e+08	3.77222e+08	4.74921e+08	4.06103e+08	4.55207e+08	4.99204e+08	3.13236e+08	3.18693e+08	3.89824e+08	4.59308e+08	2.6749e+08	2.67681e+08	2.62836e+08
415POS		PC(35:0)+H	PC(35:0)+H	PC	(35:0)	(35:0)				C43 H87 O8 N1 P1	776.616	11.9951	0.0197083	1.61874	0.0225338	0.204883	2.30502e+07	6.5514e+07	4.77733e+07	1.79792e+07	4.51734e+07	3.00408e+07	4.51333e+07	5.92008e+07	2.93241e+07	2.25169e+07	4.02298e+07	4.0916e+07	2.20239e+07	2.15839e+07	2.11729e+07
416POS		PC(35:0)+H	PC(35:0)+H	PC	(35:0)	(35:0)				C43 H87 O8 N1 P1	776.616	12.287	0.0316422	1.35957	0.0983421	0.12897	1.98597e+07	4.74637e+07	4.26851e+07	1.5512e+07	37231691	2.31258e+07	3.2246e+07	4.35043e+07	2.95208e+07	2.49804e+07	4.23618e+07	4.13766e+07	2.05445e+07	1.95072e+07	1.9415e+07
417POS		PC(36:0e)+H	PC(36:0e)+H	PC	(36:0e)	(36:0e)				C44 H91 O7 N1 P1	776.653	13.4882	0.0335235	1.70113	0.00657867	0.185682	1.74379e+07	4.21076e+07	5.50734e+07	1.83624e+07	3.46486e+07	2.37551e+07	4.09052e+07	3.68354e+07	2.35941e+07	2.38591e+07	2.54145e+07	4.51227e+07	2.27639e+07	2.15505e+07	2.14393e+07
418POS		TG(16:0/11:1/18:2)+NH4	TG(45:3)+NH4	TG	(16:0/11:1/18:2)	(16:0)	(11:1)	(18:2)		C48 H90 O6 N1	776.676	16.8166	0.0949961	2.18744	0.116914	0.174347	7.68327e+06	9.50022e+06	2.65267e+07	2.91171e+06	2.61571e+07	3.38054e+06	4.3885e+07	4.31344e+07	8.55825e+06	6.04967e+06	1.53923e+07	1.95895e+07	8.41526e+06	9.80626e+06	8.29587e+06
419POS		TG(9:0/18:1/18:2)+NH4	TG(45:3)+NH4	TG	(9:0/18:1/18:2)	(9:0)	(18:1)	(18:2)		C48 H90 O6 N1	776.676	16.2917	0.0441708	2.0673	0.0911359	0.0897007	2.84685e+06	3.50789e+06	6.5193e+06	3.04372e+06	5.12902e+06	751922	1.31365e+07	1.38276e+07	5.22693e+06	2.74846e+06	4.55232e+06	10936077	2.95438e+06	3.18542e+06	2.95271e+06
41POS		Cer(d30:0)+H	Cer(d30:0)+H	Cer	(d30:0)	(d30:0)				C30 H62 O3 N1	484.472	7.55778	0.0195544	1.44658	0.0462937	0.0877321	1.19116e+07	1.89161e+07	1.65543e+07	7.80469e+06	1.86918e+07	1.6279e+07	2.20923e+07	1.56178e+07	1.0776e+07	7.77957e+06	2.03707e+07	2.2411e+07	8.37027e+06	8.37413e+06	8.09182e+06
420POS		PC(16:1/18:2)+Na	PC(34:3)+Na	PC	(16:1/18:2)	(16:1)	(18:2)			C42 H78 O8 N1 P1 Na1	778.536	9.04442	0.00842597	1.20123	0.0125147	0.352397	2.90557e+08	4.04206e+08	362396199	3.28691e+08	3.00244e+08	3.54352e+08	346460299	384532397	3.14918e+08	2.79417e+08	2.62911e+08	2.82319e+08	5.88934e+08	5.976e+08	5.88991e+08
421POS		PE(17:0/22:6)+H	PE(39:6)+H	PE	(17:0/22:6)	(17:0)	(22:6)			C44 H77 O8 N1 P1	778.538	10.1617	0.0162335	1.54703	0.00545796	0.467739	2.37689e+08	370078770	4.12651e+08	2.01612e+08	3.15222e+08	2.87328e+08	3.31383e+08	5.42652e+08	2.4759e+08	2.3517e+08	2.72953e+08	3.92282e+08	2.29121e+08	2.2908e+08	2.22719e+08
422POS		PC(34:3)+Na	PC(34:3)+Na	PC	(34:3)	(34:3)				C42 H78 O8 N1 P1 Na1	778.536	9.41437	0.00766713	1.08964	0.255483	0.478174	2.9646e+08	291806650	3.0229e+08	296125934	3.05196e+08	4.11428e+08	3.1561e+08	3.24365e+08	3.03754e+08	2.92201e+08	2.5844e+08	2.63737e+08	4.01552e+08	4.01564e+08	3.96249e+08
423POS		PC(36:6)+H	PC(36:6)+H	PC	(36:6)	(36:6)				C44 H77 O8 N1 P1	778.538	8.40263	0.0203604	1.82096	0.0376967	0.953811	5.05801e+08	9.16654e+08	1132290897	4.11555e+08	8.97073e+08	7.0805e+08	8.91733e+08	1167978664	6.42556e+08	4.241e+08	896923309	2062895504	407795112	4.07978e+08	3.9367e+08
424POS		PC(36:6)+H	PC(36:6)+H	PC	(36:6)	(36:6)				C44 H77 O8 N1 P1	778.538	8.11517	0.0214373	1.36756	0.141722	0.18839	9.96101e+07	1.32313e+08	1.27257e+08	5.21627e+07	1.54325e+08	1.29739e+08	1.89342e+08	1.39182e+08	1.0288e+08	5.95387e+07	1.93943e+08	1.88121e+08	6.38153e+07	6.38167e+07	6.14754e+07
425POS		PC(36:6)+H	PC(36:6)+H	PC	(36:6)	(36:6)				C44 H77 O8 N1 P1	778.538	7.83769	0.0204913	1.45352	0.189362	0.178159	2.68199e+07	5.44518e+07	6.64445e+07	2.25598e+07	8.10165e+07	78229981	7.50646e+07	7.27675e+07	4.3939e+07	3.21317e+07	1.13178e+08	117652302	3.28993e+07	3.21362e+07	3.15851e+07
426POS		PE(18:1p/22:4)+H	PE(40:5p)+H	PE	(18:1p/22:4)	(18:1p)	(22:4)			C45 H81 O7 N1 P1	778.575	11.3944	0.0712859	1.49744	0.104796	0.211342	3.86066e+07	1.1083e+08	1.34138e+08	5.50199e+07	7.2761e+07	5.40324e+07	7.06396e+07	5.76002e+07	6.76403e+07	4.20714e+07	4.61688e+07	5.53381e+07	7.11483e+07	7.97869e+07	7.02788e+07
427POS		PA(42:6p)+NH4	PA(42:6p)+NH4	PA	(42:6p)	(42:6p)				C45 H81 O7 N1 P1	778.575	11.535	0.0125201	1.84911	0.0513154	0.595034	9.77165e+07	6.07967e+08	2.65393e+08	122946482	2.35028e+08	3.33932e+08	2.64408e+08	2.22375e+08	1.23454e+08	2.54992e+08	1.99627e+08	2.17464e+08	1.04742e+08	1.05769e+08	1.0317e+08
428POS		TG(15:0/12:0/18:2)+NH4	TG(45:2)+NH4	TG	(15:0/12:0/18:2)	(15:0)	(12:0)	(18:2)		C48 H92 O6 N1	778.692	17.5589	0.0736518	2.72726	0.0278745	0.232265	1.00361e+07	3.20237e+07	3.15236e+07	1.35915e+07	1.41622e+07	1.99662e+06	5.30512e+07	6.93302e+07	2.17317e+07	1.04261e+07	1.46342e+07	4.27515e+07	1.83217e+07	1.62025e+07	1.61343e+07
429POS		PC(18:4/18:1)+H	PC(36:5)+H	PC	(18:4/18:1)	(18:4)	(18:1)			C44 H79 O8 N1 P1	780.554	9.98674	0.0197165	0.96237	0.738924	0.399955	2.44405e+08	2.13676e+08	1.57744e+08	2.41541e+08	1.56027e+08	197345620	1.66371e+08	1.93267e+08	2.26714e+08	1.81679e+08	1.30375e+08	2.07906e+08	5.46558e+08	5.66219e+08	5.65042e+08
42POS		LPC(14:0)+Na	LPC(14:0)+Na	LPC	(14:0)	(14:0)				C22 H46 O7 N1 P1 Na1	490.29	2.26041	0.0399817	1.75997	0.00513206	0.0859471	4.23038e+06	1.01674e+07	8.50948e+06	4.04908e+06	5.98565e+06	7.63585e+06	6.30051e+06	1.27347e+07	7.24524e+06	4.20854e+06	6.60141e+06	1.15348e+07	6.91562e+06	7.39412e+06	6.89437e+06
430POS		PC(36:5)+H	PC(36:5)+H	PC	(36:5)	(36:5)				C44 H79 O8 N1 P1	780.554	8.48669	0.0203057	1.25989	0.36989	0.332691	4.17198e+08	6.43062e+08	704181541	2.8813e+08	9.80152e+08	8.1647e+08	8.99061e+08	7.88261e+08	5.58976e+08	463175031	1343240892	1252602837	3.56319e+08	3.5644e+08	3.43991e+08
431POS		PC(36:5)+H	PC(36:5)+H	PC	(16:0/20:5)	(16:0)	(20:5)			C44 H79 O8 N1 P1	780.554	9.12992	0.0354555	0.760355	0.0668348	2.54285	5140555375	3119095797	3578510539	3657133163	6080037992	4820308154	3593695871	3191270552	4528575391	3513047636	6556373710	4109123087	2597206965	2598275022	2441414400
432POS		PC(34:2)+Na	PC(34:2)+Na	PC	(34:2)	(34:2)				C42 H80 O8 N1 P1 Na1	780.551	10.4212	0.120796	1.16082	0.199204	0.12339	5.58905e+07	5.092e+07	4.9897e+07	5.774e+07	4.5625e+07	53610811	5.60812e+07	6.02223e+07	6.07613e+07	3.44284e+07	30067072	5.95361e+07	8.89874e+07	1.08598e+08	8.83424e+07
433POS		PE(40:5e)+H	PE(40:5e)+H	PE	(40:5e)	(40:5e)				C45 H83 O7 N1 P1	780.59	11.7169	0.0312593	2.16683	0.166975	0.193994	1.07736e+07	2.80627e+07	1.48968e+08	2.90222e+07	2.93718e+07	1.7656e+07	7.95729e+07	4.05618e+07	3.59648e+07	2.73766e+07	2.58118e+07	2.82335e+07	1.48242e+07	1.4765e+07	1.56087e+07
434POS		PE(18:0p/22:4)+H	PE(40:4p)+H	PE	(18:0p/22:4)	(18:0p)	(22:4)			C45 H83 O7 N1 P1	780.59	12.2698	0.0209539	1.21003	0.782049	0.146607	9.74247e+06	5.89272e+07	1.87781e+08	7.9138e+07	1.79526e+08	1.75065e+07	5.00928e+07	3.25626e+07	1.19565e+07	9.7906e+06	1.85077e+07	2.66204e+07	1.55614e+07	1.5603e+07	1.50246e+07
435POS		PE(20:0p/20:4)+H	PE(40:4p)+H	PE	(20:0p/20:4)	(20:0p)	(20:4)			C45 H83 O7 N1 P1	780.59	12.6005	0.0212854	1.85836	0.0153848	0.386423	5.11744e+07	9.95449e+07	2.20651e+08	6.31096e+07	1.26798e+08	9.5431e+07	2.05557e+08	1.48243e+08	7.27178e+07	7.30092e+07	1.0896e+08	1.51889e+08	6.0332e+07	6.03951e+07	5.81658e+07
436POS		SM(d40:4)+H	SM(d40:4)+H	SM	(d40:4)	(d40:4)				C45 H86 O6 N2 P1	781.622	11.8278	0.0292459	0.618699	0.000220515	0.540855	1.60772e+08	6.57615e+07	7.95011e+07	1.4162e+08	1.09313e+08	1.03618e+08	7.4904e+07	8.01483e+07	1.26584e+08	1.32225e+08	1.20538e+08	8.54903e+07	169689483	1.61359e+08	161390290
437POS		PC(16:0/20:4)+H	PC(36:4)+H	PC	(16:0/20:4)	(16:0)	(20:4)			C44 H81 O8 N1 P1	782.569	8.83005	0.00398541	1.30393	0.0768839	0.408278	5.70816e+08	9.87507e+08	836438910	3.78234e+08	8.83874e+08	5.78867e+08	8.58903e+08	7.25847e+08	6.44146e+08	4.99387e+08	7.87863e+08	9.20832e+08	2.73667e+08	2.75561e+08	2.73667e+08
438POS		PE(19:0/20:4)+H	PE(39:4)+H	PE	(19:0/20:4)	(19:0)	(20:4)			C44 H81 O8 N1 P1	782.569	10.8762	0.0325464	0.729021	0.260127	0.486191	3.89145e+08	1.54494e+08	1.31725e+08	1.7338e+08	1.2175e+08	162114482	1.33336e+08	1.27148e+08	1.61265e+08	156012873	1.17328e+08	1.0687e+08	3.33747e+08	3.15465e+08	3.15768e+08
439POS		PC(34:1)+Na	PC(34:1)+Na	PC	(34:1)	(34:1)				C42 H82 O8 N1 P1 Na1	782.567	11.535	0.0105708	0.971431	0.885729	0.299159	2.50026e+08	2.87185e+08	3.02832e+08	184715047	1.78987e+08	2.04367e+08	2.4279e+08	1.97787e+08	2.89166e+08	1.35218e+08	4.27976e+08	1.89244e+08	1.75134e+08	1.75247e+08	1.72003e+08
43POS		LPE(17:0)+Na	LPE(17:0)+Na	LPE	(17:0)	(17:0)				C22 H46 O7 N1 P1 Na1	490.29	3.6874	0.0137991	1.73312	0.0271738	0.0518937	1.65284e+06	3.81666e+06	2.89704e+06	1.01791e+06	2.70535e+06	2.60747e+06	2.34419e+06	5.48992e+06	2.01054e+06	1.67582e+06	3.22216e+06	4.13544e+06	1.03296e+06	1.03269e+06	1.00834e+06
440POS		PC(16:0/18:1)+Na	PC(34:1)+Na	PC	(16:0/18:1)	(16:0)	(18:1)			C42 H82 O8 N1 P1 Na1	782.567	9.80803	0.00834716	0.980017	0.544439	5.05368	32402623890	28038522595	27347658395	26642430908	28895415886	28011436990	28910946495	30022479693	30422908478	28728150289	29330580936	30565585983	29665991092	29241034990	29241331622
441POS		PC(36:4)+H	PC(36:4)+H	PC	(18:2/18:2)	(18:2)	(18:2)			C44 H81 O8 N1 P1	782.569	9.2452	0.0135936	1.01518	0.922892	1.95408	8814442000	9004513500	10392558375	5783997859	13497387095	11050121488	10690226157	9716531446	10073943460	8944364744	16024046022	13242720852	6401249000	6400352201	6251270029
442POS		PC(36:4)+H	PC(36:4)+H	PC	(16:0/20:4)	(16:0)	(20:4)			C44 H81 O8 N1 P1	782.569	10.0196	0.131177	1.20184	0.679608	0.820525	1.99217e+08	5.74727e+08	5.91753e+08	750791289	4.80563e+08	1002151272	488735691	2008499167	4.18431e+08	1768729305	6.11391e+08	4.16855e+08	9.05587e+08	8.48865e+08	1086719761
443POS		PC(37:3p)+H	PC(37:3p)+H	PC	(37:3p)	(37:3p)				C45 H85 O7 N1 P1	782.606	12.8113	0.0141716	2.09916	0.00962929	0.362	3.34149e+07	8.8378e+07	1.05458e+08	2.5851e+07	9.16701e+07	7.58455e+07	1.59289e+08	7.89026e+07	4.38966e+07	3.71269e+07	4.86251e+07	8.11175e+07	4.82016e+07	4.73003e+07	4.68861e+07
444POS		PE(38:1e)+Na	PE(38:1e)+Na	PE	(38:1e)	(38:1e)				C43 H86 O7 N1 P1 Na1	782.603	12.467	0.0141455	2.05441	0.0169876	0.229761	1.15594e+07	7.06815e+07	3.92261e+07	1.66155e+07	3.61574e+07	3.03772e+07	5.55228e+07	3.47086e+07	1.7148e+07	1.93142e+07	2.46548e+07	2.72081e+07	1.81314e+07	1.814e+07	1.7695e+07
445POS		SM(d38:0)+Na	SM(d38:0)+Na	SM	(d38:0)	(d38:0)				C43 H89 O6 N2 P1 Na1	783.635	12.1793	0.0325681	0.274655	0.0220283	0.318099	9.06882e+06	6.73276e+06	7.55571e+06	4.61803e+07	6.94467e+07	2.07027e+07	6.20453e+06	8.75824e+06	2.78939e+07	4.97119e+07	1.44928e+07	9.58975e+06	9.65287e+06	9.12722e+06	9.12898e+06
446POS		PC(36:3)+H	PC(36:3)+H	PC	(36:3)	(36:3)				C44 H83 O8 N1 P1	784.585	10.0937	0.0192427	1.13883	0.0836551	2.19446	8209486907	12027326151	10938038862	8505170669	10277413677	9798718116	12133254996	11602197911	9188175868	11835013198	11484386403	11260326139	11850441835	11416208903	11543097445
447POS		PC(36:3)+H	PC(36:3)+H	PC	(36:3)	(36:3)				C44 H83 O8 N1 P1	784.585	11.6729	0.00691112	0.974127	0.674026	0.519519	2.75586e+08	2.9341e+08	3.28447e+08	279194525	3.33319e+08	2.74541e+08	2.94281e+08	3.52131e+08	3.17528e+08	3.12196e+08	3.16752e+08	2.44299e+08	3.39281e+08	3.35268e+08	3.35235e+08
448POS		PC(36:3)+H	PC(36:3)+H	PC	(36:3)	(36:3)				C44 H83 O8 N1 P1	784.585	10.4798	0.154151	1.1215	0.696038	0.775505	1753525558	8.55843e+08	1755948964	1497539667	2687009464	1679439455	2138163656	9.62166e+08	1571459400	2.78335e+08	5.08306e+08	1912618848	6.37299e+08	8.13653e+08	6.21983e+08
449POS		TG(16:0/8:0/22:6)+NH4	TG(46:6)+NH4	TG	(16:0/8:0/22:6)	(16:0)	(8:0)	(22:6)		C49 H86 O6 N1	784.645	14.8136	0.0215303	1.52663	0.311788	0.133	2.34511e+07	2.22843e+07	5.13956e+07	4.02491e+07	4.91046e+07	5.55924e+06	5.37636e+07	1.27404e+08	4.71369e+07	2.28013e+07	3.63537e+07	7.40724e+07	2.11405e+07	2.03902e+07	2.03537e+07
44POS		LPC(16:1)+H	LPC(16:1)+H	LPC	(16:1)	(16:1)				C24 H49 O7 N1 P1	494.324	2.3571	0.0136835	1.82099	0.00168007	0.830476	2.53873e+08	663885197	5.86582e+08	1.79794e+08	5.09862e+08	5.52296e+08	450467934	6.45209e+08	3.15552e+08	2.18876e+08	4.42441e+08	5.98577e+08	2.47204e+08	2.5039e+08	2.43632e+08
450POS		CerG1(d18:1/22:0)+H	CerG1(d40:1)+H	CerG1	(d18:1/22:0)	(d18:1)	(22:0)			C46 H90 O8 N1	784.666	13.2439	0.02246	0.962924	0.855241	0.267935	1.12036e+08	173278828	1.704e+08	1.06495e+08	2.98909e+08	1.52902e+08	1.721e+08	1.44856e+08	1.30341e+08	1.53982e+08	2.64231e+08	212934075	1.16508e+08	116389936	1.11978e+08
451POS		SM(d40:2)+H	SM(d40:2)+H	SM	(d40:2)	(d40:2)				C45 H90 O6 N2 P1	785.653	11.991	0.0260251	0.684846	0.225727	0.689373	3.87501e+08	2.5489e+08	2.76401e+08	2.49435e+08	1023835111	3.33698e+08	395705781	273841805	3.56726e+08	3.64312e+08	539732949	4.6627e+08	252872668	2.42184e+08	2.41463e+08
452POS		PE(20:5/20:4)+H	PE(40:9)+H	PE	(20:5/20:4)	(20:5)	(20:4)			C45 H73 O8 N1 P1	786.507	8.24653	0.0352787	1.06712	0.857841	0.0620644	1.33842e+07	1.07927e+07	11367915	8.9596e+06	2.00803e+07	1.63755e+07	1.07185e+07	1.14613e+07	1.18225e+07	1.11887e+07	2.96514e+07	4.0753e+07	6.53434e+06	6.53391e+06	6.14283e+06
453POS		PE(38:6)+Na	PE(38:6)+Na	PE	(16:0/22:6)	(16:0)	(22:6)			C43 H74 O8 N1 P1 Na1	786.504	9.857	0.0514519	0.914604	0.207182	0.253399	6.91915e+07	5.84666e+07	6.72782e+07	6.18846e+07	5.50358e+07	5.51269e+07	5.86836e+07	4.69369e+07	6.16413e+07	6.06831e+07	5.56914e+07	4.65405e+07	1.03328e+08	1.03487e+08	1.12904e+08
454POS		PC(36:2)+H	PC(36:2)+H	PC	(18:1/18:1)	(18:1)	(18:1)			C44 H85 O8 N1 P1	786.601	10.9764	0.00724186	0.914687	0.194395	6.48122	37180181003	31652514393	37237987690	36318799412	49079492185	38068054561	37186270897	34946630824	35541617340	35532996587	42372007598	36797589400	36494578346	36491451129	36037186820
456POS		SM(d40:1)+H	SM(d40:1)+H	SM	(d40:1)	(d40:1)				C45 H92 O6 N2 P1	787.669	12.148	0.128889	0.607957	0.24218	0.249055	1.35309e+07	2.22078e+07	3.12611e+07	3.65929e+07	1.19895e+08	4.76307e+07	2.37753e+07	2.51208e+07	4.69148e+07	5.65435e+07	2.63079e+07	3.22608e+07	1.90828e+07	1.93722e+07	1.52397e+07
457POS		PE(40:8)+H	PE(40:8)+H	PE	(40:8)	(40:8)				C45 H75 O8 N1 P1	788.522	9.291	0.0186262	1.19458	0.438337	0.073852	6.27516e+07	8.70154e+07	6.90712e+07	5.22617e+07	1.20167e+08	8.45527e+07	8.65693e+07	9.72747e+07	8.20481e+07	6.22128e+07	1.23816e+08	1.76696e+08	4.52072e+07	4.52218e+07	43771422
458POS		PE(20:4/20:4)+H	PE(40:8)+H	PE	(20:4/20:4)	(20:4)	(20:4)			C45 H75 O8 N1 P1	788.522	9.04041	0.0117935	1.01459	0.916925	0.51747	4.68495e+08	4.15377e+08	5.08467e+08	3.77666e+08	6.74211e+08	5.39156e+08	4.81922e+08	5.1533e+08	4.65588e+08	4.39286e+08	7.20928e+08	7.31811e+08	2.77031e+08	2.76999e+08	2.71395e+08
459POS		PE(18:0/20:5)+Na	PE(38:5)+Na	PE	(18:0/20:5)	(18:0)	(20:5)			C43 H76 O8 N1 P1 Na1	788.52	10.4452	0.0213721	0.640541	0.000357227	0.428194	9.37363e+07	6.90163e+07	5.25785e+07	9.29381e+07	6.72339e+07	5.94145e+07	5.82338e+07	4.8296e+07	8.9945e+07	9.60998e+07	7.79395e+07	4.41926e+07	1.54523e+08	1.54534e+08	1.6032e+08
45POS		LPC(16:0)+H	LPC(16:0)+H	LPC	(16:0)	(16:0)				C24 H51 O7 N1 P1	496.34	2.97206	0.0158009	1.3785	0.0635541	2.66229	10333415129	16820806099	21180146055	9081849116	22241826474	16115869099	15282250954	21650282886	13477165598	10094346416	17507288107	23001659341	10365904351	10134315061	10056510059
460POS		PG(18:2/18:2)+NH4	PG(36:4)+NH4	PG	(18:2/18:2)	(18:2)	(18:2)			C42 H79 O10 N1 P1	788.544	8.43179	0.0127419	1.6957	0.065334	0.179867	3.22118e+07	3.54776e+07	4.16463e+07	8.5337e+06	4.32476e+07	3.23084e+07	4.74318e+07	5.89832e+07	2.0091e+07	2.47414e+07	4.8154e+07	8.42571e+07	1.88215e+07	1.88127e+07	1.84049e+07
461POS		TG(10:0/18:2/18:2)+NH4	TG(46:4)+NH4	TG	(10:0/18:2/18:2)	(10:0)	(18:2)	(18:2)		C49 H90 O6 N1	788.676	16.5804	0.0814977	1.79127	0.343552	0.179889	1.86042e+07	2.24428e+07	4.86637e+07	2.62381e+07	6.06663e+07	7.49806e+06	5.81826e+07	2.11692e+08	4.17983e+07	3.47211e+07	4.83939e+07	6.42697e+07	2.25012e+07	2.56626e+07	2.22187e+07
462POS		TG(10:0/18:2/18:2)+NH4	TG(46:4)+NH4	TG	(10:0/18:2/18:2)	(10:0)	(18:2)	(18:2)		C49 H90 O6 N1	788.676	15.9328	0.0997008	8.82669	0.0843232	0.360862	6.30989e+06	6.93788e+06	17532743	6.92286e+06	1.21896e+07	1.69445e+06	1.61102e+08	1.42324e+08	5.2197e+06	5.60909e+06	6.32498e+06	4.62147e+07	1.63843e+07	1.39152e+07	1.37835e+07
463POS		SM(d40:0)+H	SM(d40:0)+H	SM	(d40:0)	(d40:0)				C45 H94 O6 N2 P1	789.684	13.3049	0.0212395	0.41616	0.011868	0.765998	1.32505e+08	7.85479e+07	9.36121e+07	2.13516e+08	4.34969e+08	152651486	7.55168e+07	9.68014e+07	1.95955e+08	272411223	1.75648e+08	9.58992e+07	1.14398e+08	1.14553e+08	1.10317e+08
464POS		PE(20:3/20:4)+H	PE(40:7)+H	PE	(20:3/20:4)	(20:3)	(20:4)			C45 H77 O8 N1 P1	790.538	9.31473	0.0119538	1.04242	0.745049	0.175423	6.44404e+07	7.46386e+07	6.15226e+07	5.89397e+07	7.81239e+07	6.50029e+07	4.97201e+07	9.08081e+07	6.94204e+07	6.20462e+07	4.31783e+07	5.04129e+07	7.34119e+07	7.19197e+07	7.19056e+07
465POS		PE(18:0/20:4)+Na	PE(38:4)+Na	PE	(18:0/20:4)	(18:0)	(20:4)			C43 H78 O8 N1 P1 Na1	790.536	11.1321	0.00813041	0.892445	0.194405	0.422731	1.75072e+08	1.33135e+08	1.39535e+08	1.55816e+08	158187149	1.54724e+08	1.34783e+08	2.05491e+08	1.74711e+08	1.70177e+08	1.61274e+08	1.20527e+08	5.63118e+08	5.54902e+08	5.5568e+08
466POS		PE(38:4)+Na	PE(38:4)+Na	PE	(38:4)	(38:4)				C43 H78 O8 N1 P1 Na1	790.536	10.2477	0.0181866	1.07355	0.514488	0.182992	5.91323e+07	5.03323e+07	6.95766e+07	6.22803e+07	7.72812e+07	7.1364e+07	6.36961e+07	6.48488e+07	6.48392e+07	4.18753e+07	7.20372e+07	8.53882e+07	5.50315e+07	5.33221e+07	5.50441e+07
468POS		PG(36:3)+NH4	PG(36:3)+NH4	PG	(36:3)	(36:3)				C42 H81 O10 N1 P1	790.559	6.86765	0.0383679	1.67705	0.274418	0.615556	3.25002e+08	1.08083e+08	3.72116e+08	2.89721e+06	2.14191e+08	5.2701e+08	4.03322e+08	6.22332e+07	2.33951e+08	1.25105e+07	5.05165e+08	6.96862e+08	1243673372	1205223087	1151965862
469POS		PG(18:1/18:2)+NH4	PG(36:3)+NH4	PG	(18:1/18:2)	(18:1)	(18:2)			C42 H81 O10 N1 P1	790.559	8.50469	0.019642	7.85333	0.00205628	0.397101	7.12439e+06	5.16372e+07	5.66423e+07	3.44654e+06	1.44977e+07	1.62956e+07	6.64465e+07	5.11205e+07	8.99591e+06	3.42121e+06	7.24665e+06	109156091	2.59032e+07	2.65121e+07	2.54987e+07
46POS		LPC(16:0)+H	LPC(16:0)+H	LPC	(16:0)	(16:0)				C24 H51 O7 N1 P1	496.34	4.90666	0.100611	1.34323	0.110578	0.0518507	1.35586e+07	1.97189e+07	1.48068e+07	9.01185e+06	1.34238e+07	1.74387e+07	1.51072e+07	1.81957e+07	1.88811e+07	1.34741e+07	1.80382e+07	3.07712e+07	1.82279e+07	1.91901e+07	1.57359e+07
470POS		PC(38:6p)+H	PC(38:6p)+H	PC	(38:6p)	(38:6p)				C46 H81 O7 N1 P1	790.575	8.89016	0.0585186	1.87676	0.0142088	0.125412	6.8058e+06	1.40964e+07	1.2439e+07	3.61632e+06	1.26788e+07	7.07283e+06	1.76878e+07	1.72349e+07	6.21907e+06	6.9804e+06	1.08921e+07	2.0038e+07	6.53289e+06	6.93805e+06	6.17215e+06
471POS		PC(36:0)+H	PC(36:0)+H	PC	(18:0/18:0)	(18:0)	(18:0)			C44 H89 O8 N1 P1	790.632	12.725	0.0171521	0.91784	0.552436	0.367183	1.24485e+08	1.19759e+08	1.9733e+08	109925621	2.30522e+08	1.27084e+08	1.59915e+08	1.40721e+08	1.48415e+08	1.58828e+08	1.92656e+08	1.40752e+08	1.25261e+08	1.23372e+08	1.21042e+08
473POS		TG(16:0/12:1/18:2)+NH4	TG(46:3)+NH4	TG	(16:0/12:1/18:2)	(16:0)	(12:1)	(18:2)		C49 H92 O6 N1	790.692	17.2715	0.0559916	7.18953	0.0560275	0.77568	1.90177e+07	1.46089e+08	2.25755e+08	1.09694e+07	7.77143e+07	1.56228e+07	7.89297e+08	3.06631e+08	3.91323e+07	1.79586e+07	6.62865e+07	1.77953e+08	6.84132e+07	6.77401e+07	7.48735e+07
474POS		TG(46:3)+NH4	TG(46:3)+NH4	TG	(46:3)	(46:3)				C49 H92 O6 N1	790.692	15.77	0.00726872	4.17352	0.0274582	0.251783	2.97096e+06	1.32226e+07	2.72834e+07	6.79703e+06	1.30365e+07	1.76171e+06	5.40332e+07	6.35507e+07	1.1178e+07	5.79938e+06	8.0689e+06	3.98542e+07	8.49819e+06	8.60581e+06	8.49855e+06
475POS		PC(37:6)+H	PC(37:6)+H	PC	(37:6)	(37:6)				C45 H79 O8 N1 P1	792.554	8.97373	0.0133772	1.36011	0.0438564	0.501184	5.84834e+08	9.06088e+08	9.3224e+08	4.26724e+08	9.16468e+08	7.2641e+08	7.0464e+08	880569935	6.10407e+08	5.84396e+08	8.09307e+08	1198191420	3.69106e+08	3.69283e+08	3.60707e+08
476POS		PC(37:6)+H	PC(37:6)+H	PC	(37:6)	(37:6)				C45 H79 O8 N1 P1	792.554	9.72356	0.0110709	1.01897	0.852699	0.478401	2.97079e+08	2.19802e+08	3.07406e+08	2.41726e+08	3.542e+08	3.68842e+08	2.62006e+08	2.64271e+08	2.52543e+08	243128891	3.15278e+08	3.13954e+08	1.91469e+08	1.90496e+08	1.87442e+08
477POS		PE(18:0/22:6)+H	PE(40:6)+H	PE	(18:0/22:6)	(18:0)	(22:6)			C45 H79 O8 N1 P1	792.554	10.8394	0.00545268	1.09567	0.215518	1.78081	4463688530	4088458037	5656159871	4834872787	5921954620	5853869417	5340219429	5589168662	4379373717	4489543439	4831752983	5160304190	4596292639	4552610383	4553721747
478POS		PE(40:6)+H	PE(40:6)+H	PE	(40:6)	(40:6)				C45 H79 O8 N1 P1	792.554	11.499	0.0127477	0.934716	0.415998	0.366113	1.48354e+08	1.41813e+08	1.24101e+08	1.34832e+08	192604248	1.4723e+08	1.4342e+08	1.17981e+08	1.24683e+08	1.2924e+08	1.46214e+08	1.44199e+08	1.04117e+08	1.02571e+08	1.01513e+08
479POS		PG(36:2)+NH4	PG(36:2)+NH4	PG	(36:2)	(36:2)				C42 H83 O10 N1 P1	792.575	7.60263	0.0135738	1.79092	0.175626	0.109751	1.21421e+07	5.74285e+06	1.19061e+07	303111	9.74548e+06	1.10452e+07	1.45518e+07	3.33776e+06	6.18399e+06	715113	9.89477e+06	2.32346e+07	5.78674e+07	5.788e+07	5.65237e+07
47POS		LPE(20:5)+H	LPE(20:5)+H	LPE	(20:5)	(20:5)				C25 H43 O7 N1 P1	500.277	2.515	0.0522608	1.5193	0.0042664	0.082894	5.98902e+06	8.96855e+06	1.07193e+07	4.77987e+06	7.53691e+06	1.07087e+07	1.00355e+07	1.30644e+07	7.04859e+06	5.99844e+06	1.05659e+07	1.01908e+07	4.71554e+06	4.31501e+06	4.311e+06
480POS		PC(38:6e)+H	PC(38:6e)+H	PC	(38:6e)	(38:6e)				C46 H83 O7 N1 P1	792.59	10.1381	0.0134373	1.92366	0.000541934	0.670638	215008551	4.48231e+08	5.39636e+08	2.17119e+08	2.54212e+08	2.57892e+08	4.51792e+08	4.2489e+08	2.03048e+08	2.07277e+08	1.95433e+08	3.63116e+08	2.14032e+08	2.19021e+08	2.13971e+08
482POS		PG(36:4)+Na	PG(36:4)+Na	PG	(18:2/18:2)	(18:2)	(18:2)			C42 H75 O10 N0 P1 Na1	793.499	8.43179	0.0245436	1.54232	0.0236035	0.105841	1.81176e+07	1.91985e+07	2.05543e+07	6.9726e+06	1.99048e+07	1.80794e+07	2.85303e+07	2.96851e+07	1.19651e+07	1.574e+07	2.18885e+07	2.98385e+07	8.68621e+06	9.03661e+06	8.64346e+06
483POS		PE(20:1/18:1)+Na	PE(38:2)+Na	PE	(20:1/18:1)	(20:1)	(18:1)			C43 H82 O8 N1 P1 Na1	794.567	9.374	0.023973	1.16253	0.39965	0.25507	3.58365e+08	617855187	3.82165e+08	1.94882e+08	4.9709e+08	3.33031e+08	3.99299e+08	4.93686e+08	4.10954e+08	3.4244e+08	6.08176e+08	5.77887e+08	2.33145e+08	2.33205e+08	2.23625e+08
485POS		PE(20:1/20:4)+H	PE(40:5)+H	PE	(20:1/20:4)	(20:1)	(20:4)			C45 H81 O8 N1 P1	794.569	11.1264	0.0146512	1.41749	0.000204917	0.420864	3.45787e+08	5.94773e+08	4.78071e+08	3.45111e+08	3.68668e+08	4.22614e+08	5.18455e+08	536966476	340651751	3.42876e+08	4.16772e+08	5.10704e+08	4.2684e+08	4.16289e+08	4.16092e+08
487POS		PC(38:4p)+H	PC(38:4p)+H	PC	(38:4p)	(38:4p)				C46 H85 O7 N1 P1	794.606	11.237	0.0134052	1.3242	0.0495491	0.185095	7.69198e+07	9.15745e+07	1.66759e+08	7.38718e+07	1.19897e+08	1.035e+08	1.33211e+08	1.42129e+08	9.07601e+07	9.27965e+07	1.23142e+08	1.27402e+08	7.80652e+07	7.63026e+07	7.62588e+07
48POS		LPE(20:5)+H	LPE(20:5)+H	LPE	(20:5)	(20:5)				C25 H43 O7 N1 P1	500.277	2.10224	0.0237248	1.01888	0.933496	0.0787777	6.94049e+06	4.74193e+06	8.33229e+06	4.97118e+06	1.28033e+07	1.37287e+07	6.64537e+06	7.41766e+06	7.16486e+06	5.55907e+06	1.1178e+07	8.6687e+06	4.9417e+06	4.74647e+06	4.7417e+06
490POS		SM(d39:1)+Na	SM(d39:1)+Na	SM	(d39:1)	(d39:1)				C44 H89 O6 N2 P1 Na1	795.635	12.3008	0.013714	0.684142	0.0582589	0.455633	100328066	7.80388e+07	6.69451e+07	8.70575e+07	1.26152e+08	6.67679e+07	4.88804e+07	9.4275e+07	1.17126e+08	1.35e+08	166953439	1.46307e+08	3.26707e+07	3.26889e+07	3.19098e+07
491POS		CerG1(d40:4)+NH4	CerG1(d40:4)+NH4	CerG1	(d40:4)	(d40:4)				C46 H87 O8 N2	795.646	17.216	0.00499512	2.26386	0.110951	0.254908	1.62371e+07	4.4088e+07	9.93907e+07	1.50462e+07	5.83971e+07	1.63374e+07	7.84027e+07	1.90445e+08	35649145	6.74105e+07	2.47782e+07	6.37663e+07	7.22872e+07	7.16689e+07	7.1662e+07
492POS		CerG1(d40:4)+NH4	CerG1(d40:4)+NH4	CerG1	(d40:4)	(d40:4)				C46 H87 O8 N2	795.646	16.956	0.019775	4.18567	0.00458139	0.549759	3.3065e+07	1.08857e+08	1.42357e+08	2.05939e+07	3.30707e+07	1.33724e+07	1.85493e+08	1.93582e+08	6.19453e+07	1.37669e+07	3.35971e+07	1.76893e+08	1.00167e+08	1.03636e+08	100164549
493POS		PS(35:2)+Na	PS(35:2)+Na	PS	(35:2)	(35:2)				C41 H76 O10 N1 P1 Na1	796.51	8.501	0.0294679	2.2965	0.0232253	0.154698	9.43345e+06	5.77199e+06	1.64094e+07	984172	8.53177e+06	1.52075e+07	1.42444e+07	1.52424e+07	6.85504e+06	1.69994e+06	1.3046e+07	2.62485e+07	3.42861e+07	3.46511e+07	3.27674e+07
494POS		PC(37:4)+H	PC(37:4)+H	PC	(17:0/20:4)	(17:0)	(20:4)			C45 H83 O8 N1 P1	796.585	10.1734	0.00948045	1.21454	0.0803221	0.732352	1859717407	2751573077	2396161926	1460521816	2506331090	1920207608	2032798294	2854524601	1907802699	1782891862	2326314604	2429210080	1495013853	1495254057	1470717454
495POS		PE(38:1)+Na	PE(38:1)+Na	PE	(38:1)	(38:1)				C43 H84 O8 N1 P1 Na1	796.583	13.0529	0.0420962	1.05881	0.657607	0.0830368	1.0461e+07	1.52235e+07	1.52835e+07	8.47664e+06	1.62605e+07	8.72502e+06	1.17575e+07	1.09866e+07	1.04305e+07	1.24411e+07	1.32126e+07	1.34983e+07	5.78442e+06	5.3854e+06	5.3791e+06
496POS		PC(37:4)+H	PC(37:4)+H	PC	(37:4)	(37:4)				C45 H83 O8 N1 P1	796.585	11.7621	0.0136818	1.61516	0.00752625	0.758218	3.01302e+08	8.32377e+08	6.6536e+08	2.94467e+08	6.07973e+08	4.65128e+08	7.19634e+08	7.40179e+08	3.52075e+08	3.68206e+08	5.54802e+08	5.81015e+08	3.66508e+08	3.5858e+08	3.57447e+08
497POS		PC(37:4)+H	PC(37:4)+H	PC	(37:4)	(37:4)				C45 H83 O8 N1 P1	796.585	12.066	0.0236113	0.569714	0.014538	0.475177	8.2686e+07	6.57583e+07	6.34887e+07	7.94264e+07	7.22525e+07	4.5483e+07	6.12966e+07	5.79527e+07	8.788e+07	1.61709e+08	133104590	5.75672e+07	4.7999e+07	4.80384e+07	4.60816e+07
498POS		PC(38:4e)+H	PC(38:4e)+H	PC	(38:4e)	(38:4e)				C46 H87 O7 N1 P1	796.621	11.0316	0.0178492	2.02929	0.00728487	0.477688	6.64558e+07	2.66843e+08	2.15647e+08	6.34565e+07	1.15492e+08	9.15302e+07	1.87704e+08	1.80267e+08	9.72559e+07	8.90263e+07	94028011	124833835	1.12611e+08	1.09273e+08	1.09131e+08
499POS		PC(38:4e)+H	PC(38:4e)+H	PC	(38:4e)	(38:4e)				C46 H87 O7 N1 P1	796.621	11.4101	0.0179787	1.6949	0.00766111	0.915929	3.89382e+08	7.86706e+08	1009919885	2.93855e+08	7.85647e+08	5.73913e+08	916360459	8.1891e+08	370048879	377458336	6.68973e+08	7.84581e+08	357375932	3.57487e+08	3.46416e+08
49POS		LPE(20:4)+H	LPE(20:4)+H	LPE	(20:4)	(20:4)				C25 H45 O7 N1 P1	502.293	2.42298	0.0161003	1.33204	0.115932	0.519415	3.11031e+08	4.06345e+08	5.61094e+08	2.19169e+08	6.13508e+08	6.22019e+08	3.87834e+08	5.36769e+08	3.70936e+08	262853850	5.29296e+08	5.5868e+08	2.57757e+08	2.57492e+08	250509891
4POS		Cer(d18:0)+H	Cer(d18:0)+H	Cer	(d18:0)	(d18:0)				C18 H38 O3 N1	316.285	1.883	0.0274743	1.26243	0.100338	0.0401442	8.70857e+06	8.587e+06	1.09579e+07	5.67208e+06	9.73567e+06	9.37976e+06	1.09413e+07	1.0247e+07	7.86476e+06	5.57776e+06	1.22986e+07	1.28283e+07	5.91441e+06	5.64217e+06	5.64106e+06
500POS		TG(16:0/14:0/16:0)+NH4	TG(46:0)+NH4	TG	(16:0/14:0/16:0)	(16:0)	(14:0)	(16:0)		C49 H98 O6 N1	796.739	20.6128	0.0214304	2.32976	0.0125857	0.455604	6.93204e+07	1.52233e+08	2.07756e+08	1.31282e+08	9.74119e+07	6.45822e+07	1.89093e+08	3.06461e+08	8.34272e+07	5.2147e+07	8.3024e+07	2.8346e+08	2.00649e+08	2.00786e+08	1.93359e+08
501POS		SM(d41:3)+H	SM(d41:3)+H	SM	(d41:3)	(d41:3)				C46 H90 O6 N2 P1	797.653	11.3258	0.0105208	1.32671	0.27162	0.0566184	1.11663e+07	2.07961e+07	1.66865e+07	8.78681e+06	3.09452e+07	1.94632e+07	2.0165e+07	3.25598e+07	1.75263e+07	1.27152e+07	2.95677e+07	3.72062e+07	9.56621e+06	9.56606e+06	9.39286e+06
502POS		PE(40:6p)+Na	PE(40:6p)+Na	PE	(18:1p/22:5)	(18:1p)	(22:5)			C45 H78 O7 N1 P1 Na1	798.541	11.2595	0.0314646	0.929342	0.533451	0.127901	1.60605e+07	1.60989e+07	1.65499e+07	2.33903e+07	1.43076e+07	1.60476e+07	1.52034e+07	1.73637e+07	1.62352e+07	1.8146e+07	1.16808e+07	1.15038e+07	2.6115e+07	2.47301e+07	2.47535e+07
503POS		PC(37:3)+H	PC(37:3)+H	PC	(37:3)	(37:3)				C45 H85 O8 N1 P1	798.601	10.5856	0.0357543	1.304	0.0560196	0.112988	1.70199e+08	2.39144e+08	1.67809e+08	1.02944e+08	142434998	1.31622e+08	1.86503e+08	221301678	1.76604e+08	1.12924e+08	175518076	201949768	1.49902e+08	1.50482e+08	1.41092e+08
504POS		PC(37:3)+H	PC(37:3)+H	PC	(37:3)	(37:3)				C45 H85 O8 N1 P1	798.601	12.5701	0.155535	1.72838	0.0223647	0.14168	9.38338e+06	2.95514e+07	2.4611e+07	1.04583e+07	2.22451e+07	1.26455e+07	3.01811e+07	1.7987e+07	9.38073e+06	1.06389e+07	1.59293e+07	1.98995e+07	1.08265e+07	1.39353e+07	1.06832e+07
505POS		PC(38:3e)+H	PC(38:3e)+H	PC	(38:3e)	(38:3e)				C46 H89 O7 N1 P1	798.637	11.8693	0.0345821	1.70709	0.00939183	0.20981	2.54393e+07	5.66365e+07	5.4559e+07	1.74507e+07	42350645	2.90181e+07	5.92095e+07	4.29865e+07	2.66259e+07	2.2299e+07	2.97304e+07	3.73752e+07	2.56245e+07	2.55813e+07	2.40998e+07
506POS		CerG1(d18:1/23:0)+H	CerG1(d41:1)+H	CerG1	(d18:1/23:0)	(d18:1)	(23:0)			C47 H92 O8 N1	798.682	13.8282	0.0213434	1.24081	0.27211	0.050858	4.26075e+07	6.60001e+07	6.47259e+07	2.98774e+07	7.2238e+07	4.36201e+07	5.21005e+07	5.83674e+07	4.79409e+07	4.03589e+07	7.51954e+07	9.76269e+07	4.22833e+07	4.08502e+07	4.06794e+07
507POS		SM(d41:2)+H	SM(d41:2)+H	SM	(d41:2)	(d41:2)				C46 H92 O6 N2 P1	799.669	12.5006	0.034146	0.984795	0.938305	0.197825	105145484	8.95943e+07	1.04172e+08	6.51764e+07	1.61561e+08	105471129	8.09102e+07	1.09339e+08	1.19787e+08	8.15349e+07	1.52853e+08	1.8614e+08	6.58125e+07	6.22288e+07	6.19248e+07
508POS		PC(36:6)+Na	PC(36:6)+Na	PC	(36:6)	(36:6)				C44 H76 O8 N1 P1 Na1	800.52	8.40263	0.0085314	1.57233	0.0137452	0.304985	8.68193e+07	1.50165e+08	1.8213e+08	6.63221e+07	1.27096e+08	126592289	1.43972e+08	1.82464e+08	1.22719e+08	9.48894e+07	1.53579e+08	2.38934e+08	7.83672e+07	7.83556e+07	7.72092e+07
509POS		PC(37:2)+H	PC(37:2)+H	PC	(37:2)	(37:2)				C45 H87 O8 N1 P1	800.616	11.5411	0.0170917	0.865773	0.372207	1.05688	1448931335	9.18654e+08	1335428457	6.70882e+08	1419302883	9.05571e+08	1175210369	1117501213	1261108308	1143063674	1943088595	1375446211	7.30576e+08	7.2206e+08	7.06331e+08
50POS		LPE(20:4)+H	LPE(20:4)+H	LPE	(20:4)	(20:4)				C25 H45 O7 N1 P1	502.293	11.5656	0.0215331	1.34662	0.114676	0.064243	5.48067e+06	1.0115e+07	1.43736e+07	5.66943e+06	1.11846e+07	7.1117e+06	9.68145e+06	9.68904e+06	5.93413e+06	5.51824e+06	1.06434e+07	8.86007e+06	4.42817e+06	4.24236e+06	4.32132e+06
510POS		PC(38:2e)+H	PC(38:2e)+H	PC	(38:2e)	(38:2e)				C46 H91 O7 N1 P1	800.653	12.6502	0.0292175	1.95458	0.00918453	0.313928	2.16336e+07	7.79645e+07	101256223	2.43975e+07	7.82391e+07	5.45444e+07	8.39402e+07	5.64636e+07	2.8585e+07	2.9608e+07	4.67036e+07	7.37548e+07	3.0905e+07	3.09387e+07	2.93833e+07
511POS		TG(48:14)+Na	TG(48:14)+Na	TG	(48:14)	(48:14)				C51 H70 O6 Na1	801.506	7.23513	0.0158314	4.50662	0.00263909	0.21383	2.68477e+06	1.24626e+07	1.93145e+07	1.6543e+06	7.32404e+06	7.59916e+06	2.35722e+07	1.86248e+07	3.53992e+06	3.32749e+06	6.9257e+06	3.31483e+07	4.80923e+06	4.68548e+06	4.67464e+06
512POS		SM(d41:1)+H	SM(d41:1)+H	SM	(d41:1)	(d41:1)				C46 H94 O6 N2 P1	801.684	13.2414	0.0347513	0.784813	0.29351	0.403042	1.43134e+08	8.92751e+07	74268037	8.26163e+07	126926262	7.65646e+07	6.89459e+07	9.43309e+07	1.39651e+08	1.27632e+08	1.6818e+08	2.15158e+08	8.17163e+07	7.71673e+07	7.68255e+07
513POS		SM(d41:1)+H	SM(d41:1)+H	SM	(d41:1)	(d41:1)				C46 H94 O6 N2 P1	801.684	13.5953	0.0209427	0.716003	0.0932378	1.90427	2327457324	1262060285	1321986306	1413934042	2430401393	1277011822	1267677392	1653458526	2473523302	1987638878	2966940331	2955371935	1328588570	1289721529	1276223735
514POS		PC(16:1/20:4)+Na	PC(36:5)+Na	PC	(16:1/20:4)	(16:1)	(20:4)			C44 H78 O8 N1 P1 Na1	802.536	8.85471	0.0690725	0.876481	0.207352	0.596355	3.83085e+08	3.33884e+08	2.91204e+08	3.33661e+08	3.02643e+08	3.21038e+08	2.89545e+08	2.79124e+08	3.84325e+08	3.27121e+08	2.29833e+08	2.03692e+08	1.35227e+08	1.19915e+08	1.20595e+08
515POS		PC(36:5)+Na	PC(36:5)+Na	PC	(36:5)	(36:5)				C44 H78 O8 N1 P1 Na1	802.536	8.48669	0.0107198	0.764903	0.273016	0.451102	1.00382e+08	1.01596e+08	145748007	9.80565e+07	2.05157e+08	2.03386e+08	1.30965e+08	1.29392e+08	1.85287e+08	2.00151e+08	3.33659e+08	147663448	1.39316e+08	139352325	136763134
516POS		PC(16:0/20:5)+Na	PC(36:5)+Na	PC	(16:0/20:5)	(16:0)	(20:5)			C44 H78 O8 N1 P1 Na1	802.536	9.12992	0.00265472	0.736805	0.0218987	0.62446	2.89726e+08	1.61653e+08	1.75043e+08	2.98672e+08	2.16007e+08	245018265	1.61192e+08	1.87383e+08	2.2834e+08	2.20816e+08	1.91359e+08	134334296	298153643	2.96621e+08	2.97719e+08
517POS		PE(40:5e)+Na	PE(40:5e)+Na	PE	(40:5e)	(40:5e)				C45 H82 O7 N1 P1 Na1	802.572	12.6124	0.0184458	1.65057	0.0271006	0.133333	9.74334e+06	1.74238e+07	3.76505e+07	1.23063e+07	2.3586e+07	1.80064e+07	3.42064e+07	2.56702e+07	1.41652e+07	1.49786e+07	2.04493e+07	2.42241e+07	9.40128e+06	9.11656e+06	9.09861e+06
518POS		PC(37:1)+H	PC(37:1)+H	PC	(37:1)	(37:1)				C45 H89 O8 N1 P1	802.632	12.2128	0.0388055	1.6731	0.010561	0.482707	124880447	3.32283e+08	2.74667e+08	8.70212e+07	2.16413e+08	1.56203e+08	2.64709e+08	2.87626e+08	1.63507e+08	1.32299e+08	2.44121e+08	3.04481e+08	1.10856e+08	1.0408e+08	1.03414e+08
519POS		SM(d41:0)+H	SM(d41:0)+H	SM	(d41:0)	(d41:0)				C46 H96 O6 N2 P1	803.7	13.904	0.0346502	0.508219	0.0032132	0.358293	4.21581e+07	2.21083e+07	2.55035e+07	4.56158e+07	8.37852e+07	3.76756e+07	2.05174e+07	2.85828e+07	5.14636e+07	5.64746e+07	4.32505e+07	2.9639e+07	3.02992e+07	2.85869e+07	2.85166e+07
51POS		LPE(20:3)+H	LPE(20:3)+H	LPE	(20:3)	(20:3)				C25 H47 O7 N1 P1	504.308	2.71089	0.0253199	2.32698	0.00744416	0.211465	1.26963e+07	4.82859e+07	2.48031e+07	7.56857e+06	2.16356e+07	2.32271e+07	1.77385e+07	4.08011e+07	1.20267e+07	8.46706e+06	1.62731e+07	2.82012e+07	2.06298e+07	2.06263e+07	1.97365e+07
521POS		PC(16:0/20:4)+Na	PC(36:4)+Na	PC	(16:0/20:4)	(16:0)	(20:4)			C44 H80 O8 N1 P1 Na1	804.551	9.82311	0.0601824	0.897681	0.283179	0.248311	7.39913e+07	6.29777e+07	5.07695e+07	5.28739e+07	5.21026e+07	6.05269e+07	3.98557e+07	5.77781e+07	6.22505e+07	6.50957e+07	4.88098e+07	4.68799e+07	1.68181e+08	1.68172e+08	1.86338e+08
522POS		PE(40:3p)+Na	PE(40:3p)+Na	PE	(40:3p)	(40:3p)				C45 H84 O7 N1 P1 Na1	804.588	12.2573	0.0161947	1.46707	0.0814828	0.307556	6.50397e+07	6.35126e+07	1.96016e+08	8.41643e+07	1.62911e+08	1.53401e+08	1.56524e+08	1.41325e+08	8.01534e+07	8.89698e+07	1.32355e+08	1.89405e+08	6.15652e+07	5.99577e+07	5.9794e+07
523POS		PC(38:0e)+H	PC(38:0e)+H	PC	(38:0e)	(38:0e)				C46 H95 O7 N1 P1	804.684	14.7367	0.0206011	2.31309	0.00218773	0.158132	3.371e+06	1.55231e+07	2.01385e+07	4.31289e+06	1.15331e+07	8.35023e+06	1.94275e+07	1.48652e+07	6.94013e+06	6.24519e+06	7.11462e+06	1.31016e+07	1.0403e+07	1.0404e+07	1.00366e+07
524POS		TG(16:1/13:0/18:2)+NH4	TG(47:3)+NH4	TG	(16:1/13:0/18:2)	(16:1)	(13:0)	(18:2)		C50 H94 O6 N1	804.708	17.6163	0.0285775	3.76335	0.0261529	0.318861	1.46572e+07	2.82189e+07	3.24519e+07	6.55945e+06	2.12825e+07	5.03349e+06	7.34953e+07	9.74308e+07	1.97117e+07	7.8229e+06	1.37735e+07	7.87657e+07	2.91893e+07	2.93545e+07	2.78536e+07
525POS		SM(d40:0+pO)+H	SM(d40:0+pO)+H	SM	(d40:0+pO)	(d40:0+pO)				C45 H94 O7 N2 P1	805.679	12.24	0.0568578	0.807113	0.232378	0.190932	2.18007e+07	3.27263e+07	2.30638e+07	25310279	4.88226e+07	2.10083e+07	2.4121e+07	2.42145e+07	2.3291e+07	2.73249e+07	3.98284e+07	2.52941e+07	1.92982e+07	1.93553e+07	1.74846e+07
526POS		PC(38:6)+H	PC(38:6)+H	PC	(38:6)	(38:6)				C46 H81 O8 N1 P1	806.569	10.3256	0.00462602	0.972051	0.725194	0.529844	3.3514e+08	2.46334e+08	3.17389e+08	339415846	3.33074e+08	3.46161e+08	3.11918e+08	2.50299e+08	2.91553e+08	2.80309e+08	2.3446e+08	2.91153e+08	5.11554e+08	5.11556e+08	5.07467e+08
527POS		PC(16:0/22:6)+H	PC(38:6)+H	PC	(16:0/22:6)	(16:0)	(22:6)			C46 H81 O8 N1 P1	806.569	8.5297	0.0100654	1.93752	0.102885	0.547699	1.6377e+08	218513288	1.15986e+08	6.7365e+07	2.53819e+08	2.14016e+08	3.69414e+08	3.24907e+08	1.65865e+08	1.07496e+08	2.37012e+08	6.85631e+08	5.46934e+07	5.47193e+07	5.37584e+07
528POS		PC(16:0/22:6)+H	PC(38:6)+H	PC	(16:0/22:6)	(16:0)	(22:6)			C46 H81 O8 N1 P1	806.569	9.05837	0.0235761	0.913011	0.502246	2.14014	6563663349	5009339212	7169255265	3546170068	7890701999	5520946748	5382972242	5528449529	6038415832	5371100231	8471327944	5975143853	3610002277	3611561592	3465322036
529POS		PE(19:0/22:6)+H	PE(41:6)+H	PE	(19:0/22:6)	(19:0)	(22:6)			C46 H81 O8 N1 P1	806.569	11.2633	0.00971938	1.17712	0.0599167	0.17321	1.1529e+08	1.27675e+08	1.45121e+08	9.05733e+07	1.18248e+08	1.03971e+08	1.14905e+08	1.53057e+08	1.07824e+08	1.1483e+08	1.25203e+08	1.46256e+08	8.49863e+07	8.50268e+07	8.35839e+07
52POS		LPE(20:3)+H	LPE(20:3)+H	LPE	(20:3)	(20:3)				C25 H47 O7 N1 P1	504.308	4.949	0.0726583	3.06793	0.00376857	0.124258	1.94592e+06	2.86753e+06	7.14934e+06	925836	4.19532e+06	9.02435e+06	4.92186e+06	6.75763e+06	1.82126e+06	1.89449e+06	2.76135e+06	1.08318e+07	2.35898e+06	2.32435e+06	2.06036e+06
530POS		PC(38:6)+H	PC(38:6)+H	PC	(38:6)	(38:6)				C46 H81 O8 N1 P1	806.569	9.49622	0.0222613	0.998315	0.98594	5.73548	44373878468	38544798371	58240707314	40630722164	56966742309	35505610219	45831477161	41378395426	43357141455	43335234398	40998288670	49706600790	40105351629	40138979022	38595053041
531POS		PE(42:6e)+H	PE(42:6e)+H	PE	(42:6e)	(42:6e)				C47 H85 O7 N1 P1	806.606	12.422	0.0245124	2.13198	0.0208908	0.326047	2.03707e+07	4.71849e+07	9.55388e+07	1.22956e+07	8.58297e+07	5.64368e+07	9.44114e+07	7.20049e+07	2.78715e+07	1.20846e+07	45308844	6.88379e+07	3.11228e+07	3.08183e+07	2.97007e+07
532POS		TG(15:0/14:0/18:2)+NH4	TG(47:2)+NH4	TG	(15:0/14:0/18:2)	(15:0)	(14:0)	(18:2)		C50 H96 O6 N1	806.723	18.9165	0.0559069	3.60215	0.015136	0.397231	2.21806e+07	5.55033e+07	6.89477e+07	9.59669e+06	3.1384e+07	1.03756e+07	1.17997e+08	1.41564e+08	3.8064e+07	1.02633e+07	2.02715e+07	8.02331e+07	6.66888e+07	6.095e+07	6.03388e+07
533POS		SM(d42:5)+H	SM(d42:5)+H	SM	(d42:5)	(d42:5)				C47 H88 O6 N2 P1	807.637	11.9822	0.0351049	0.605701	0.000173981	0.505854	1.10792e+08	6.50665e+07	5.94166e+07	9.21957e+07	1.14068e+08	7.66524e+07	6.07351e+07	6.07401e+07	1.04355e+08	128541314	1.30534e+08	8.95603e+07	5.89733e+07	5.90586e+07	5.54996e+07
534POS		PS(16:0/22:6)+H	PS(38:6)+H	PS	(16:0/22:6)	(16:0)	(22:6)			C44 H75 O10 N1 P1	808.512	8.66126	0.0318676	1.47727	0.0666927	0.255386	1.8816e+08	2.68774e+08	3.22359e+08	1.94871e+08	3.16763e+08	1.90149e+08	4.03393e+08	2.84235e+08	1.45455e+08	2.38787e+08	2.5367e+08	5.0724e+08	1.55929e+08	155967899	1.47496e+08
535POS		PC(18:1/18:1)+Na	PC(36:2)+Na	PC	(18:1/18:1)	(18:1)	(18:1)			C44 H84 O8 N1 P1 Na1	808.583	10.9764	0.0233748	0.938863	0.433773	0.501752	2.84833e+08	281014509	2.50218e+08	3.04948e+08	2.22816e+08	2.47828e+08	2.1235e+08	2.5687e+08	269297802	2.76901e+08	2.00164e+08	2.15367e+08	5.61105e+08	5.38868e+08	5.39104e+08
536POS		PC(38:5)+H	PC(38:5)+H	PC	(18:1/20:4)	(18:1)	(20:4)			C46 H83 O8 N1 P1	808.585	9.99159	0.0085777	1.11039	0.055812	2.08688	9007635457	10424279166	9123752585	7242578224	8276615035	9529361851	8679532073	8972224023	8309519326	8355314542	9778979125	9868344785	7453372128	7566020167	7456106112
538POS		PE(42:4p)+H	PE(42:4p)+H	PE	(42:4p)	(42:4p)				C47 H87 O7 N1 P1	808.621	12.777	0.060344	2.41065	0.00542652	0.145355	4.89742e+06	1.79769e+07	1.48169e+07	3.52222e+06	9.2135e+06	5.81006e+06	19707804	1.14066e+07	5.16542e+06	4.79951e+06	5.87744e+06	1.09796e+07	4.6557e+06	4.3566e+06	4.12864e+06
539POS		CerG1(d18:1/24:2)+H	CerG1(d42:3)+H	CerG1	(d18:1/24:2)	(d18:1)	(24:2)			C48 H90 O8 N1	808.666	12.1969	0.0246134	2.31307	0.00338382	0.300471	1.25531e+07	6.29001e+07	6.18897e+07	9.83275e+06	4.23474e+07	2.86951e+07	5.6897e+07	4.87694e+07	1.74393e+07	1.45735e+07	3.9036e+07	5.49218e+07	2.14776e+07	2.1506e+07	2.05887e+07
53POS		LPE(18:0)+Na	LPE(18:0)+Na	LPE	(18:0)	(18:0)				C23 H48 O7 N1 P1 Na1	504.306	4.39418	0.00961781	1.22022	0.0803655	0.176789	9.45979e+07	1.25641e+08	1.31717e+08	8.01633e+07	1.58022e+08	1.24437e+08	1.27964e+08	161152714	1.05859e+08	1.03035e+08	1.25945e+08	1.43734e+08	6.65693e+07	6.55142e+07	6.54352e+07
540POS		TG(15:0/16:0/16:1)+NH4	TG(47:1)+NH4	TG	(15:0/16:0/16:1)	(15:0)	(16:0)	(16:1)		C50 H98 O6 N1	808.739	20.0272	0.0178673	3.54603	0.0107105	0.51415	5.17261e+07	1.14664e+08	108373949	1.99561e+07	5.19438e+07	1.62048e+07	2.02084e+08	2.04725e+08	4.44268e+07	1.61462e+07	3.17996e+07	1.19885e+08	9.21144e+07	9.22614e+07	8.93669e+07
542POS		PG(16:1/22:6)+NH4	PG(38:7)+NH4	PG	(16:1/22:6)	(16:1)	(22:6)			C44 H77 O10 N1 P1	810.528	6.79299	0.0516343	2.57757	0.00437744	0.12852	2.62218e+06	8.0719e+06	9.16444e+06	604161	5.00836e+06	6.4627e+06	1.22678e+07	9.38463e+06	3.09635e+06	1.48403e+06	9.47401e+06	1.21002e+07	9.8401e+06	9.84024e+06	8.9856e+06
543POS		PC(38:4)+H	PC(38:4)+H	PC	(18:0/20:4)	(18:0)	(20:4)			C46 H85 O8 N1 P1	810.601	11.1149	0.00521702	0.653766	0.463068	0.366206	1.73367e+08	1.59398e+08	1.70012e+08	1.4152e+08	9.78596e+08	1.72251e+08	2.20575e+08	2.12255e+08	1.87736e+08	1.65091e+08	1.57838e+08	2.45e+08	1.78305e+08	1.78281e+08	1.76687e+08
545POS		PC(18:0/20:4)+H	PC(38:4)+H	PC	(18:0/20:4)	(18:0)	(20:4)			C46 H85 O8 N1 P1	810.601	10.8093	0.0049923	0.835511	0.06069	4.95695	18689504360	12936315205	16633795727	15845612574	23507541423	18622005484	15877984548	14542533061	16674312214	17185262720	21722533956	16322095108	16471475452	16330240482	16329491141
546POS		PC(18:0/20:4)+H	PC(38:4)+H	PC	(18:0/20:4)	(18:0)	(20:4)			C46 H85 O8 N1 P1	810.601	10.3156	0.010383	1.14828	0.369334	0.762724	2420282685	4030048966	2213161550	1786899647	2596959400	1892997354	2183247773	2131937199	2062231069	1878880769	2331537971	2564397969	1751099969	1720247905	1719721914
547POS		PC(39:3p)+H	PC(39:3p)+H	PC	(39:3p)	(39:3p)				C47 H89 O7 N1 P1	810.637	13.9629	0.0297477	1.57091	0.0341136	0.0594364	4.0701e+06	5.5847e+06	8.57241e+06	2.77556e+06	6.62422e+06	3.93963e+06	1.00009e+07	6.67661e+06	3.44348e+06	4.62435e+06	5.27587e+06	7.34754e+06	3.40944e+06	3.6174e+06	3497998
548POS		TG(8:0/18:1/22:6)+NH4	TG(48:7)+NH4	TG	(8:0/18:1/22:6)	(8:0)	(18:1)	(22:6)		C51 H88 O6 N1	810.661	14.8224	0.0313624	2.41718	0.0777876	0.132941	4.65851e+06	7.85999e+06	1.33508e+07	5.15534e+06	1.05162e+07	1.76495e+06	1.7051e+07	3.46782e+07	7.46995e+06	4.82145e+06	6.66021e+06	2.02459e+07	4.49285e+06	4.25801e+06	4.25665e+06
549POS		CerG1(d18:1/24:1)+H	CerG1(d42:2)+H	CerG1	(d18:1/24:1)	(d18:1)	(24:1)			C48 H92 O8 N1	810.682	13.1534	0.0206981	1.77993	0.0246023	0.609797	1.30981e+08	4.30569e+08	4.23692e+08	8.73835e+07	3.57514e+08	2.05384e+08	3.65122e+08	2.831e+08	1.38315e+08	1.44287e+08	310111325	3.72146e+08	1.39664e+08	1.35835e+08	1.34148e+08
54POS		LPC(18:1p)+H	LPC(18:1p)+H	LPC	(18:1p)	(18:1p)				C26 H53 O6 N1 P1	506.361	4.122	0.029349	1.23961	0.330924	0.0443439	1.47714e+07	1.92366e+07	2.51499e+07	1.07465e+07	2.94306e+07	1.67372e+07	1.22865e+07	2.56639e+07	1.3674e+07	1.40228e+07	2.33183e+07	3.22793e+07	1.2467e+07	1.24627e+07	1.18418e+07
550POS		TG(15:0/16:0/16:0)+NH4	TG(47:0)+NH4	TG	(15:0/16:0/16:0)	(15:0)	(16:0)	(16:0)		C50 H100 O6 N1	810.755	21.0109	0.0219376	2.53955	0.00904488	0.259712	2.25593e+07	3.74274e+07	3.55113e+07	1.41486e+07	2.35533e+07	1.07259e+07	5.29188e+07	5.6457e+07	1.66366e+07	9.42422e+06	1.40338e+07	6.18186e+07	4.01432e+07	3.87313e+07	3.85897e+07
551POS		TG(16:0e/16:0/16:0)+NH4	TG(48:0e)+NH4	TG	(16:0e/16:0/16:0)	(16:0e)	(16:0)	(16:0)		C51 H104 O5 N1	810.791	22.781	0.0271261	0.999411	0.997416	0.0953204	1.04256e+07	1.4333e+07	1.77147e+07	1.01695e+07	1.58163e+07	4.97239e+06	1.64917e+07	9.07162e+06	1.12509e+07	1.30833e+07	1.24093e+07	1.05284e+07	1.07271e+07	1.07927e+07	1.02654e+07
552POS		SM(d40:0)+Na	SM(d40:0)+Na	SM	(d40:0)	(d40:0)				C45 H93 O6 N2 P1 Na1	811.666	13.3049	0.014379	0.262362	0.00385133	0.489111	3.67314e+07	1.50154e+07	1.69392e+07	8.12784e+07	1.31029e+08	4.29927e+07	1.30562e+07	1.73144e+07	6.51119e+07	1.00865e+08	4.57398e+07	1.55667e+07	2.26563e+07	2.2126e+07	22079390
554POS		PE(20:4/22:6)+H	PE(42:10)+H	PE	(20:4/22:6)	(20:4)	(22:6)			C47 H75 O8 N1 P1	812.522	8.7737	0.01712	1.17897	0.200875	0.118274	7.07482e+07	7.27611e+07	8.96026e+07	5.44956e+07	1.05269e+08	7.90696e+07	9.50719e+07	9.33391e+07	7.25973e+07	6.76001e+07	9.52297e+07	1.19486e+08	3.75023e+07	3.74797e+07	3.63904e+07
555POS		PS(18:0/20:4)+H	PS(38:4)+H	PS	(18:0/20:4)	(18:0)	(20:4)			C44 H79 O10 N1 P1	812.544	10.0841	0.0930545	0.802077	0.347116	0.776404	5.581e+08	6.02529e+08	5.63102e+08	5.09848e+08	1342633657	7.42325e+08	8.03714e+08	300390428	792641876	5.58819e+08	6.45742e+08	5.2332e+08	6.35246e+08	5.38628e+08	6.36525e+08
556POS		PG(18:2/20:4)+NH4	PG(38:6)+NH4	PG	(18:2/20:4)	(18:2)	(20:4)			C44 H79 O10 N1 P1	812.544	7.05675	0.0320316	1.78757	0.221839	0.3148	7.6996e+07	2.55108e+07	1.10589e+08	528092	5.0069e+07	1.27099e+08	1.05497e+08	2.35689e+07	5.09224e+07	1.29605e+06	1.36738e+08	1.7359e+08	3.15589e+08	3.16283e+08	2.98736e+08
557POS		PG(18:2/20:4)+NH4	PG(38:6)+NH4	PG	(18:2/20:4)	(18:2)	(20:4)			C44 H79 O10 N1 P1	812.544	7.50142	0.0279054	3.45125	0.00754473	0.278477	5.44511e+06	3.68604e+07	4.6937e+07	1.70822e+06	8.70918e+06	2.32861e+07	3.83264e+07	3.73835e+07	5.27628e+06	3.39972e+06	4.62261e+07	6.14332e+07	3.41482e+07	3.41565e+07	3.25278e+07
558POS		PC(18:0/18:0)+Na	PC(36:0)+Na	PC	(18:0/18:0)	(18:0)	(18:0)			C44 H88 O8 N1 P1 Na1	812.614	11.1994	0.0220509	0.892882	0.366011	3.29067	15181069976	10565594005	11976884390	9630647094	17182537857	11942636602	10533357984	9086916885	10676448415	9272143114	11642037973	11597218721	9221693755	8886594933	8870426418
55POS		LPC(18:1p)+H	LPC(18:1p)+H	LPC	(18:1p)	(18:1p)				C26 H53 O6 N1 P1	506.361	2.88651	0.0417344	2.60251	8.74842e-05	0.115925	1.87501e+06	8.05549e+06	7.83781e+06	1.19939e+06	3.71998e+06	5.6668e+06	5.6992e+06	6.75103e+06	2.48018e+06	1.85365e+06	4.51253e+06	6.69484e+06	2.53533e+06	2.53684e+06	2.35708e+06
560POS		TG(18:4/12:0/18:2)+NH4	TG(48:6)+NH4	TG	(18:4/12:0/18:2)	(18:4)	(12:0)	(18:2)		C51 H90 O6 N1	812.676	14.866	0.0187785	1.6422	0.15003	0.0873189	8.50928e+06	9.77349e+06	2.2444e+07	1.58665e+07	1.4737e+07	2.50983e+06	2.48902e+07	3.46706e+07	1.56823e+07	7.66761e+06	1.12178e+07	2.67099e+07	8.33191e+06	8.60207e+06	8.32468e+06
561POS		CerG1(d18:1/24:0)+H	CerG1(d42:1)+H	CerG1	(d18:1/24:0)	(d18:1)	(24:0)			C48 H94 O8 N1	812.697	14.5993	0.0150996	1.36146	0.0910533	0.285339	1.05068e+08	2.32302e+08	2.84463e+08	1.10494e+08	2.55783e+08	1.59123e+08	2.41537e+08	2.09466e+08	1.39075e+08	1.64436e+08	2.51167e+08	2.69995e+08	1.19829e+08	1.19542e+08	1.16592e+08
562POS		SM(d42:2)+H	SM(d42:2)+H	SM	(d42:2)	(d42:2)				C47 H94 O6 N2 P1	813.684	12.7764	0.0223703	1.20899	0.171605	1.65086	10918723829	16548039485	17442007573	10364533115	21035019156	12506208161	16115229061	15360054527	10964673951	11164355944	14929700101	17994737008	10898523113	10920150633	10492443122
563POS		PC(37:6)+Na	PC(37:6)+Na	PC	(37:6)	(37:6)				C45 H78 O8 N1 P1 Na1	814.536	8.97373	0.00999541	0.830012	0.270829	0.29918	7.94251e+07	6.79699e+07	6.83898e+07	7.35503e+07	7.06442e+07	7.60603e+07	1.16774e+07	6.73938e+07	6.55629e+07	7.19415e+07	5.6298e+07	5.4974e+07	5.64615e+07	5.64613e+07	5.74446e+07
564POS		PG(38:5)+NH4	PG(38:5)+NH4	PG	(38:5)	(38:5)				C44 H81 O10 N1 P1	814.559	6.968	0.0406031	1.82188	0.19952	0.413882	145750717	5.79793e+07	1.67621e+08	2.37745e+06	9.50804e+07	1.87955e+08	1.62327e+08	3.3591e+07	1.0472e+08	5.40743e+06	1.62183e+08	3.2974e+08	4.34549e+08	4.34423e+08	4.0463e+08
565POS		PG(38:5)+NH4	PG(38:5)+NH4	PG	(38:5)	(38:5)				C44 H81 O10 N1 P1	814.559	7.67133	0.0416649	1.98352	0.161751	0.241587	4.25737e+07	2.51431e+07	5.14052e+07	1.2227e+06	3.22167e+07	4.88141e+07	5.84738e+07	1.55246e+07	2.87016e+07	3.18887e+06	5.43017e+07	1.22377e+08	1.6676e+08	1.59391e+08	1.53464e+08
566POS		PC(38:2)+H	PC(38:2)+H	PC	(18:0/20:2)	(18:0)	(20:2)			C46 H89 O8 N1 P1	814.632	11.8441	0.0269192	0.937459	0.770149	1.06309	828035497	1337476157	1546505037	6.62008e+08	1962059308	1113607467	1243489236	1262612974	9.96014e+08	2446898799	1568037361	1430078528	7.98599e+08	7.77073e+08	7.56746e+08
567POS		TG(12:0/18:2/18:3)+NH4	TG(48:5)+NH4	TG	(12:0/18:2/18:3)	(12:0)	(18:2)	(18:3)		C51 H92 O6 N1	814.692	16.2714	0.0526559	7.88238	0.0153162	0.602799	1.10536e+07	5.35446e+07	9.53326e+07	4.25097e+06	3.84763e+07	7.94984e+06	2.60853e+08	2.17046e+08	2.42714e+07	8.77842e+06	2.08008e+07	2.13666e+08	3.53091e+07	3.23381e+07	3.22123e+07
568POS		TG(16:0/14:3/18:2)+NH4	TG(48:5)+NH4	TG	(16:0/14:3/18:2)	(16:0)	(14:3)	(18:2)		C51 H92 O6 N1	814.692	16.6795	0.0241195	5.55476	0.0488574	0.779166	3.03198e+07	6.38805e+07	1.56846e+08	2.46333e+07	9.32631e+07	2.47031e+07	651418247	5.32597e+08	6.81172e+07	3.05394e+07	6.40371e+07	2.97585e+08	6.21881e+07	6.2296e+07	5.96792e+07
56POS		LPC(17:1)+H	LPC(17:1)+H	LPC	(17:1)	(17:1)				C25 H51 O7 N1 P1	508.34	2.68599	0.0175463	1.65659	0.00818866	0.146463	1.27625e+07	3.116e+07	2.32956e+07	7.84014e+06	2.22774e+07	2.01884e+07	2.3215e+07	3.18471e+07	1.65748e+07	1.24191e+07	2.36505e+07	2.85391e+07	1.30464e+07	1.34234e+07	1.3004e+07
571POS		PE(40:5)+Na	PE(40:5)+Na	PE	(18:0/22:5)	(18:0)	(22:5)			C45 H80 O8 N1 P1 Na1	816.551	11.4405	0.00884274	1.86634	0.0121052	0.28473	3.20201e+07	9.63623e+07	7.50794e+07	4.53579e+07	68221657	5.34001e+07	8.42893e+07	1.25725e+08	3.54571e+07	3.34211e+07	4.83081e+07	5.55906e+07	4.96145e+07	4.96314e+07	4.88669e+07
572POS		PC(17:1/20:4)+Na	PC(37:5)+Na	PC	(17:1/20:4)	(17:1)	(20:4)			C45 H80 O8 N1 P1 Na1	816.551	9.39609	0.00504632	0.835825	0.11231	0.20654	3.6186e+07	3.89278e+07	2.42342e+07	2.93551e+07	2.97775e+07	2.64708e+07	2.21287e+07	3.3025e+07	4.13273e+07	3.45531e+07	3.19894e+07	2.50435e+07	35199843	3.51944e+07	3.48904e+07
573POS		PG(38:4)+NH4	PG(38:4)+NH4	PG	(38:4)	(38:4)				C44 H83 O10 N1 P1	816.575	7.21809	0.0398919	1.38734	0.424587	0.110273	2.90695e+07	1.05572e+07	2.03959e+07	1.40188e+06	1.52046e+07	2.04331e+07	2.7336e+07	5.21401e+06	1.1709e+07	2.66591e+06	2.78047e+07	3.79496e+07	6.75488e+07	6.3438e+07	6.28014e+07
574POS		PC(40:7p)+H	PC(40:7p)+H	PC	(40:7p)	(40:7p)				C48 H83 O7 N1 P1	816.59	9.33625	0.00466271	2.31331	0.00100015	0.358447	3.69766e+07	8.54144e+07	9.36691e+07	2.79282e+07	4.66604e+07	3.60262e+07	9.08068e+07	8.13674e+07	2.40402e+07	2.26775e+07	4.54099e+07	83921256	2.39467e+07	2.37546e+07	2.39483e+07
575POS		PC(38:1)+H	PC(38:1)+H	PC	(38:1)	(38:1)				C46 H91 O8 N1 P1	816.648	12.7769	0.0414992	1.03729	0.738177	0.462198	281857555	438354391	3.67061e+08	2.51834e+08	3.54215e+08	2.56477e+08	3.18516e+08	2.65443e+08	3.03833e+08	3.14479e+08	3.90238e+08	3.21321e+08	2.44242e+08	2.44727e+08	2.27328e+08
577POS		TG(16:0/14:2/18:2)+NH4	TG(48:4)+NH4	TG	(16:0/14:2/18:2)	(16:0)	(14:2)	(18:2)		C51 H94 O6 N1	816.708	17.854	0.0812927	4.26956	0.0243147	0.81903	5.08027e+07	163304177	2.89424e+08	2.8001e+07	1.30509e+08	3.38915e+07	4.48161e+08	6.9719e+08	1.57665e+08	3.83982e+07	6.65673e+07	3.83019e+08	176792136	2.00787e+08	1.73398e+08
579POS		SM(d25:0/17:0)+H	SM(d42:0)+H	SM	(d25:0/17:0)	(d25:0)	(17:0)			C47 H98 O6 N2 P1	817.716	17.1244	0.0313188	4.78069	0.0160643	0.944927	6.29798e+07	224600604	2.84545e+08	2.11577e+07	1.29655e+08	4.29023e+07	6.43715e+08	4.62881e+08	1.2731e+08	4.37113e+07	1.15314e+08	7.32317e+08	1.31599e+08	1.30935e+08	1.38495e+08
57POS		LPE(20:1)+H	LPE(20:1)+H	LPE	(20:1)	(20:1)				C25 H51 O7 N1 P1	508.34	4.50489	0.0172535	1.31684	0.179972	0.0714283	8.10229e+06	1.76353e+07	1.21322e+07	4.7334e+06	1.22175e+07	7.02707e+06	7.98197e+06	1.53595e+07	1.03818e+07	8.12495e+06	1.12755e+07	1.20736e+07	4.4225e+06	4.55656e+06	4.42362e+06
580POS		SM(d42:0)+H	SM(d42:0)+H	SM	(d42:0)	(d42:0)				C47 H98 O6 N2 P1	817.716	14.5124	0.0145153	0.444575	0.00464194	0.480224	5.1543e+07	3.27226e+07	4.32561e+07	9.39724e+07	1.4608e+08	6.07413e+07	3.57961e+07	3.8844e+07	7.86595e+07	1.01427e+08	7.27045e+07	3.06606e+07	4.8124e+07	4.69905e+07	4.68845e+07
581POS		PC(39:7)+H	PC(39:7)+H	PC	(39:7)	(39:7)				C47 H81 O8 N1 P1	818.569	10.3399	0.0144353	1.02874	0.828249	0.163881	3.97368e+07	3.36788e+07	3.60103e+07	3.68995e+07	2.58573e+07	4.37746e+07	2.41286e+07	3.67287e+07	3.63401e+07	3.27855e+07	2.21096e+07	2.49746e+07	6.71077e+07	6.54534e+07	6.71274e+07
582POS		PE(40:4)+Na	PE(40:4)+Na	PE	(20:0/20:4)	(20:0)	(20:4)			C45 H82 O8 N1 P1 Na1	818.567	11.7697	0.0137152	1.10149	0.340757	0.135192	2.55673e+07	4.12814e+07	3.43839e+07	3.09592e+07	3.63329e+07	3.08446e+07	3.14942e+07	4.10942e+07	2.61981e+07	3.08021e+07	3.596e+07	2.55798e+07	4.17281e+07	4.17504e+07	4.07557e+07
583POS		PC(39:7)+H	PC(39:7)+H	PC	(39:7)	(39:7)				C47 H81 O8 N1 P1	818.569	9.07568	0.025366	1.08563	0.481064	0.269813	1.96863e+08	2.64252e+08	2.12634e+08	129939568	206633029	1.78842e+08	1.50032e+08	209621660	2.01202e+08	1.75101e+08	2.4236e+08	2.35368e+08	1.04318e+08	9.99665e+07	9.97708e+07
584POS		PG(38:3)+NH4	PG(38:3)+NH4	PG	(38:3)	(38:3)				C44 H85 O10 N1 P1	818.591	7.99592	0.0285791	1.55621	0.322789	0.321466	1.19143e+08	4.09291e+07	1.64564e+08	842959	9.97075e+07	1.73075e+08	153282822	2.59743e+07	9.02425e+07	3.65355e+06	1.9946e+08	2.40587e+08	3.83438e+08	380452872	3.63523e+08
[truncated: 420 more rows]

## Sheet: Lipid Class HKO VS Control
class	groupname	A25-HKO-5W-4h	A71-HKO-5W-4h	A73-HKO-5W-4h	A28-HKO-5W-4h	A50-HKO-5W-4h	A910-HKO-5W-4h	A24-NC-5W-4h	A74-NC-5W-4h	A75-NC-5W-4h	A29-NC-5W-4h	A49-NC-5W-4h	A908-NC-5W-4h	Mean_group1	Mean_group2	FC	Pvalue
[truncated: 31 more rows]
