# Supplementary material for: Spliceosome component Usp39 contributes to hepatic lipid homeostasis through the regulation of lipophagy
Source: Research Square preprint supplement (doi:10.21203/rs.3.rs-2182223/v1), 2023-03-02
Supplement: Supplementary file 2 [file 4c8680fd0e5dec56281d57c9.docx]

**Table S7 Infomation for normal and NASH samples**

| Items | Sex | Age  (Years) | BMI  (Kg/m2) | AST  (U/L) | ALT  (U/L) | TG  (mmol/L) | TC  (mmol/L) | FBG  (mmol/L) | NAS |
| --- | --- | --- | --- | --- | --- | --- | --- | --- | --- |
| Non-steatosis  Non-steatosis  Non-steatosis  Non-steatosis  Non-steatosis  Non-steatosis  NASH  NASH  NASH  NASH | Male  Male  Male  Male  Male  Male  Male  Male  Male  female | 46  51  62  41  56  47  55  30  20  36 | 23.7  27.2  24  27  28.1  31.6  23.7  34  32  35.6 | 38  28  88  19  31  21  17  72  40  25 | 29  29  105  23  15  15  15  125  49  20 | 0.69  1.75  0.76  1.42  1  0.99  1.11  2.21  2.07  0.95 | 3.9  5.03  4.21  4.25  4.2  6.8  4.01  5.67  4.31  3.9 | 5.6  4.69  4.84  4.68  5.09  5.67  8.35  8.9  7.2  5.21 | 0  0  0  0  0  0  5  2  2  2 |
