# Supplementary material for: Spliceosome component Usp39 contributes to hepatic lipid homeostasis through the regulation of lipophagy
Source: Research Square preprint supplement (doi:10.21203/rs.3.rs-2182223/v1), 2023-03-02
Supplement: Supplementary file 3 [file 7890cb534b7afb1b31365f3a.docx]

**Table S6 Key resources table**

| REAGENT or RESOURCE | SOURCE | IDENTIFIER |
| --- | --- | --- |
| Antibodies | | |
| Rabbit monoclonal anti-Usp39 | Abcam | ab131244; RRID:AB_11155482 |
| Rabbit polyclonal anti- Usp39 | Abcam | ab245571; |
| Rabbit monoclonal anti- LC3A/B (D3U4C) XP | Cell Signaling Technology | 12741; RRID:AB_2617131 |
| Rabbit polyclonal anti- Albumin | proteintech | 16475-1-AP; RRID:AB_2242567 |
| mouse monoclonal anti-Actin | proteintech | 66009-1-Ig RRID:AB_2687938 |
| Rabbit polyclonal anti- SQSTM1/p62 | proteintech | 16475-1-AP; RRID:AB_2242567 |
| Rabbit monoclonal anti- Atg7 | Cell Signaling Technology | 8558; RRID:AB_10831194 |
| Rabbit Polyclonal anti-ULK1 | abways | CY6902 |
| Rabbit Polyclonal anti- ADRP/Perilipin 2 | proteintech | 15294-1-AP；RRID:AB_2878122 |
| Rat monoclonal anti- LAMP2 | Abcam | ab13524； RRID:AB_2134736 |
| Rabbit monoclonal anti-Hsf1 | Cell Signaling Technology | 4356T  RRID:AB_2120258 |
| Rabbit polyclonal anti- Hsf1 | proteintech | 51034-1-AP  RRID:AB_2120269 |
| Bacterial and virus strains | | |
| DH5α Chemically Competent Cell | Shanghai Weidi biotechnology Co.Ltd. | DL1001 |
| Stbl3 Chemically Competent Cell | Shanghai Weidi biotechnology Co.Ltd. | DL1046 |
| Biological samples |  |  |
| NAFLD and NASH liver samples from human patients | Qilu Hospital of Shandong University | N/A |
| Chemicals, peptides, and recombinant proteins | | |
| Isopropyl β-D-thiogalactoside | Sangon Biotech | A600168 |
| Penicillin-Streptomycin Solution, 100X | Biosharp | BL505A |
| Sodium pyruvate | Sigma | P4562 |
| Insulin | Macgene | CC101 |
| Insulin injection | FOSUN PHARMA | 6939863702032 |
| Dimethyl sulfoxide（DMSO） | Aladding | D103277 |
| Doxycycline hydrochloride | Sangon Biotech | A600889 |
| L- thyroxine | Sigma | T1775 |
| Chloral hydrate | Sangon | A600288 |
| Collagenase Type IV | Sigma | C5138 |
| BODIPY | Cayman | 25892 |
| Oil Red O | Sigma | O0625 |
| Dexamethasone | aladdin | D137736 |
| EGTA | Solarbio | E8050??? |
| Tamoxifen | Sigma | T5648 |
| Trypsin without ethylenediaminetetraacetic acid (EDTA) | Macgene | CC035 |
| 4% paraformaldehyde | Servicebio | G1101 |
| ProLong™ Gold Antifade Mountant with DAPI | Thermo Fisher Scientific | P36941 |
| Mounting Medium With DAPI - Aqueous, Fluoroshield | Abcam | ab104139 |
| Mounting Medium, antifading | Solarbio | S2100 |
| Hoechst 33342 Stain solution | Solarbio | C0031 |
| ProLong™ Gold Antifade Mountant with DAPI | Thermo Fisher Scientific | P36941 |
| williams medium E | Thermo Fisher Scientific | 12551032 |
| Nicotinamide | Solarbio | N8070 |
| L-Glutamine | Sangon Biotech | A600224 |
| Glycerin Gelatin Mounting Tablets | Servicebio | G1402-30ML |
| Isoflurane | RWD life science Co. | R510-22-10 |
| Research Diets D12492 60 kcal% Fat | Research Diets | D12492 |
| Glucose test strips | OneTouch Ultra® | N/A |
| α-D-glucose | Solarbio | G8150 |
| Sucrose | Sangon Biotech | A100335-0250 |
| Jetprime | polyplus-transfection | 101000046 |
| Lipofectamine® 2000 CD (Chemically Defined) Transfection Reagent | Thermo Fisher Scientific | 12566014 |
| Water Nuclease-Free | Servicebio | G4700 |
| Critical commercial assays | | |
| His-tag Protein Purification Kit | Beyotime | P2226 |
| Cell Total RNA Isolation Kit | Foregene | RE-03111 |
| Triglyceride assay kit | Nanjing jiancheng Bioengineering Institute | A110-1-1 |
| Total cholesterol assay kit | Nanjing jiancheng Bioengineering Institute | A111-1-1 |
| Nonesterified Free fatty acids assay kit | Nanjing jiancheng Bioengineering Institute | A042-2-1 |
| RNAMAX-T7 in vitro transcription kit | RiboBio | C11001-1 |
| Picro Sirius Red Stain | Anhui Leagene Biotechnology Co., Ltd. | DC0041 |
| Glycogen Periodic Acid Schiff (PAS/Hematoxylin) staining Kit | Solarbio | G1281 |
| Liver / Muscle glycogen assay kit | Nanjing jiancheng Bioengineering Institute | A043-1-1 |
| Pierce™ RNA 3’ End Desthiobiotinylation Kit | Thermo Fisher Scientific | 20163 |
| Magnetic RNA Protein Pull-Down Kit | Thermo Fisher Scientific | 20164 |
| Spin Column RNA Cleanup & Concentration Kit | Sangon | B518688 |
| Nucleoprotein Extraction Kit | Sangon | C500009 |
| EZ-Nuclear RIP Kit | Merck Millipore | 17-701 |
| Deposited data | | |
| RNA sequencing (RNA-seq) of Usp39 knockout by in 5-weeks-old male mice | This paper | GSE213633 |
| RNA immunoprecipitation sequencing (RIP-seq) of Usp39 in AML12 cells | This paper | GSE213629 |
| Lipidomics Sequencing Data of Usp39 knockout by in 5-weeks-old male mice | This paper | N/A |
| Experimental models: Cell lines | | |
| Mouse: AML12 alpha mouse liver 12 cell line | National collection of authenticated cell cultures | RRID:CVCL_0140 |
| Mouse: Hepa1-6 Hepatoma epithelial cell line | Peihui-wang lab | RRID:CVCL_0327 |
| Human: 293T Embryo kidney epithelial cell line | Peihui-wang lab | RRID:CVCL_0063 |
| Human: 293 Embryo kidney epithelial cell line | Hospitalfor Reproductive Medicine affiliate to Shandong University | RRID:CVCL_0045 |
| Experimental models: Organisms/strains | | |
| Mouse: Usp39flox/flox | Gempharmatech | C57BL/6N mice |
| Mouse: Albumin-Cre | Gempharmatech | C57BL/6J mice |
| Oligonucleotides | | |
| siRNA targeting sequence: Hsf1 #1: CCTGAAGAGTGAGGACATA | This paper | N/A |
| siRNA targeting sequence: Hsf1 #2:  GGACACAACCGGAGCCCAA | This paper | N/A |
| siRNA targeting sequence: Usp39#1: GCATCAAGAGATTTACTAA | This paper | N/A |
| siRNA targeting sequence: Usp39#2: CAAGTGGTATGAATTACAA | This paper | N/A |
| PLKO.1-shUsp39#2-TRC shRNA targeting sequence: CCTGACAACTATGAAATCATT | WZ Biosciences | TRCN0000030927 |
| PLKO.1-shUsp39#4-TRC shRNA targeting sequence: CCCGCTCTATAAGGATGAGAA | WZ Biosciences | TRCN0000030925 |
| Primers for RNA-pull down: Hsf1-E5-I7-Forward TAATACGACTCACTATAGGGGAGAACGAGGCCCTGTGG | This paper | N/A |
| Primers for RNA-pull down: Hsf1-E5-I7- Reverse TGGGAGCCAGCTCAGTGATA | This paper | N/A |
| Primers for plasmid construction: Usp39-pT3G-3FPS-Forward ACGAAGGGCGGAGGAGGATCCATGTCTAGCCGGTCCAAGCG | This paper | N/A |
| Primers for plasmid construction: Usp39-pT3G-3FPS- Reverse-CCGTCATAGCGCGTTAATTAATCAAGCCCCCTGCTGGTT | This paper | N/A |
| Primers for plasmid construction: Hsf1-pLenti- C-Myc-DDK-IRES-Puro Forward AGGAGATCTGCCGCCGCGATCGCATGGATCTGGCCGTGGGC | This paper | N/A |
| Primers for plasmid construction: Hsf1-pLenti- C-Myc-DDK-IRES-Puro Reverse- CTCGAGCGGCCGCGTacgcgtGGAGACAGTGGGGTCCTTGG | This paper | N/A |
| Primers for RT-PCR, see Table S1 | This paper | N/A |
| Primers for semiquantitative RT-PCR see Table S1 |  |  |
| Primers for RIP-qPCR, see Table S1 | This paper | N/A |
| Recombinant DNA | | |
| Doxycycline-inducible lentiviral vector pT3G-3FPS-Usp39 | This paper | N/A |
| pLenti- C-Myc-DDK-IRES-Puro- Hsf1 | This paper | N/A |
| pLenti- C-Myc-DDK-IRES-Puro vector | origene |  |
| PLKO.1-TRC-shUsp39 | WZ Biosciences |  |
|  |  |  |
| Software and algorithms | | |
| FastQC v0.11.9 | N/A | https://www.bioinformatics.babraham.ac.uk/projects/fastqc/ |
| bowtie v1.2.3 | Langmead et al., 2009 (PMID: 19261174) | http://bowtie-bio.sourceforge.net/index.shtml |
| HISAT2 v2.2.0 | Zhang et al., 2021 (PMID: 34103331) | http://daehwankimlab.github.io/hisat2/ |
| Samtools v1.9 | Li et al., 2009 (PMID: 19505943) | http://samtools.sourceforge.net/ |
| featureCounts v2.0.0 | Liao Y et al., 2014 (Liao Y et al., 2014) | http://subread.sourceforge.net/featureCounts.html |
| rMATS v4.1.0 | Shen et al., 2014 (PMID: 25480548) | http://rnaseq-mats.sourceforge.net/ |
| HOMER v4.11 | Heinz et al., 2010 (PMID: 20513432) | http://homer.ucsd.edu/homer/ |
| Gene Ontology | The Gene Ontology, 2019 (PMID: 30395331) | http://geneontology.org/ |
| GraphPad Prism 8 | N/A | https://www.graphpad.com/scientific-software/prism/ |
| ImageJ v2.1.0 | Schneider et al., 2012 (PMID: 22930834) | https://imagej.nih.gov/ij/ |
| Integrative Genomics Viewer (IGV) v2.8.2 | Robinson et al., 2017 (PMID: 29092934) | https://igv.org/ |
| Other | | |
|  | | |
