# Supplementary material for: Spliceosome component Usp39 contributes to hepatic lipid homeostasis through the regulation of lipophagy
Source: Research Square preprint supplement (doi:10.21203/rs.3.rs-2182223/v1), 2023-03-02
Supplement: Supplementary file 4 [file a4a41c3393068c6005cbcab2.xlsx]

## Sheet: 213 A3SS events
ID	GeneID	geneSymbol	chr	strand	longExonStart_0base	longExonEnd	shortES	shortEE	flankingES	flankingEE	ID	IJC_SAMPLE_1	SJC_SAMPLE_1	IJC_SAMPLE_2	SJC_SAMPLE_2	IncFormLen	SkipFormLen	PValue	FDR	IncLevel1	IncLevel2	IncLevelDifference
3	ENSMUSG00000035299.16	Mid1	chrX	+	169985896	169986097	169985935	169986097	169984998	169985142	3	2,3,8,4	2,96,75,14	0,3,2,0	21,31,13,11	188	149	0.048736	0.325068	0.442,0.024,0.078,0.185	0.0,0.071,0.109,0.0	0.137
14	ENSMUSG00000041718.16	Alg13	chrX	+	144319898	144320061	144320002	144320061	144317803	144318121	14	27,32,45,32	6,5,4,1	21,10,46,6	0,0,0,0	253	149	2.1853e-07	2.36506e-05	0.726,0.79,0.869,0.95	1.0,1.0,1.0,1.0	-0.166
23	ENSMUSG00000031229.16	Atrx	chrX	-	105879908	105880018	105879908	105880015	105884306	105884420	23	13,13,33,11	0,3,0,0	13,7,4,16	1,0,2,4	152	149	0.0246443	0.205166	1.0,0.809,1.0,1.0	0.927,1.0,0.662,0.797	0.106
45	ENSMUSG00000000838.17	Fmr1	chrX	+	68712230	68712413	68712305	68712413	68710583	68710779	45	44,23,15,20	5,5,8,7	12,34,7,18	1,5,1,0	224	149	0.00630729	0.0783739	0.854,0.754,0.555,0.655	0.889,0.819,0.823,1.0	-0.178
49	ENSMUSG00000036022.15	Fam122b	chrX	-	53258956	53259021	53258956	53259018	53259840	53259926	49	4,0,10,3	2,7,6,6	0,0,0,0	1,1,4,1	152	149	3.2652e-08	4.97943e-06	0.662,0.0,0.62,0.329	0.0,0.0,0.0,0.0	0.403
78	ENSMUSG00000036748.16	Cuedc2	chr19	-	46331545	46331640	46331545	46331619	46331756	46331818	78	13,22,8,11	0,7,2,9	13,8,8,6	4,11,12,7	170	149	0.0119476	0.11865	1.0,0.734,0.778,0.517	0.74,0.389,0.369,0.429	0.275
79	ENSMUSG00000036748.16	Cuedc2	chr19	-	46331545	46331673	46331545	46331619	46331756	46331818	79	54,23,34,44	0,7,2,9	38,16,26,16	4,11,12,7	203	149	0.00330769	0.0472226	1.0,0.707,0.926,0.782	0.875,0.516,0.614,0.627	0.196
116	ENSMUSG00000024666.6	Tmem138	chr19	-	10574836	10575008	10574836	10574935	10575239	10575511	116	15,27,11,9	6,1,0,1	19,3,5,11	0,0,0,0	222	149	0.00185984	0.0307508	0.627,0.948,1.0,0.858	1.0,1.0,1.0,1.0	-0.142
145	ENSMUSG00000054874.12	Pcnx3	chr19	-	5681431	5681574	5681431	5681553	5683276	5683412	145	4,3,0,3	9,12,7,10	0,2,0,0	11,20,7,8	170	149	8.85066e-05	0.00317208	0.28,0.18,0.0,0.208	0.0,0.081,0.0,0.0	0.147
161	ENSMUSG00000040247.6	Tbc1d10c	chr19	-	4188245	4188724	4188245	4188311	4188943	4189058	161	4,7,2,6	0,3,9,3	1,3,5,0	0,1,0,2	298	149	0.0347768	0.266993	1.0,0.538,0.1,0.5	1.0,0.6,1.0,0.0	-0.116
245	ENSMUSG00000002668.8	Dennd1c	chr17	-	57074113	57074196	57074113	57074179	57074273	57074354	245	0,4,1,2	1,6,1,1	0,0,0,0	9,2,1,6	166	149	0.000712595	0.0156259	0.0,0.374,0.473,0.642	0.0,0.0,0.0,0.0	0.372
257	ENSMUSG00000023991.16	Foxp4	chr17	-	47878283	47878497	47878283	47878494	47878606	47878754	257	40,29,35,54	19,9,12,17	30,23,73,27	2,16,9,2	152	149	0.0301193	0.237207	0.674,0.76,0.741,0.757	0.936,0.585,0.888,0.93	-0.102
311	ENSMUSG00000024013.15	Fgd2	chr17	+	29368122	29368330	29368183	29368330	29367920	29367979	311	3,15,3,14	14,24,13,25	0,1,6,2	14,13,20,9	210	149	0.0027494	0.0413644	0.132,0.307,0.141,0.284	0.0,0.052,0.176,0.136	0.125
314	ENSMUSG00000024006.17	Stk38	chr17	-	29000008	29000144	29000008	29000141	29007710	29007995	314	8,44,35,39	50,90,52,109	14,20,46,11	117,91,143,83	152	149	0.0034653	0.0488491	0.136,0.324,0.398,0.26	0.105,0.177,0.24,0.115	0.12
323	ENSMUSG00000007570.16	Fance	chr17	+	28318032	28318156	28318061	28318156	28317467	28317611	323	26,36,27,28	4,7,1,0	15,8,11,29	1,6,9,8	178	149	0.00278895	0.041772	0.845,0.811,0.958,1.0	0.926,0.527,0.506,0.752	0.226
346	ENSMUSG00000004865.16	Srpk1	chr17	-	28599470	28600456	28599470	28599869	28600868	28600894	346	36,51,16,62	0,1,0,0	42,29,33,31	0,5,2,3	298	149	0.000151516	0.00470683	1.0,0.962,1.0,1.0	1.0,0.744,0.892,0.838	0.122
350	ENSMUSG00000025735.13	Rhbdl1	chr17	-	25835276	25835377	25835276	25835353	25835469	25835582	350	4,1,2,9	0,0,1,1	6,6,2,5	4,11,2,6	173	149	1.82818e-07	2.19427e-05	1.0,1.0,0.633,0.886	0.564,0.32,0.463,0.418	0.439
351	ENSMUSG00000041199.3	Rpusd1	chr17	+	25728180	25728391	25728202	25728391	25727716	25727847	351	2,1,1,2	1,12,6,4	0,0,0,0	9,3,1,2	171	149	0.0248357	0.205788	0.635,0.068,0.127,0.303	0.0,0.0,0.0,0.0	0.283
429	ENSMUSG00000022749.8	Tbc1d23	chr16	-	57212370	57212575	57212370	57212490	57214163	57214269	429	22,55,16,61	5,6,5,3	46,30,35,29	0,0,0,0	234	149	1.59127e-08	2.66935e-06	0.737,0.854,0.671,0.928	1.0,1.0,1.0,1.0	-0.203
458	ENSMUSG00000000134.17	Tfe3	chrX	+	7766554	7766855	7766573	7766855	7765506	7765620	458	61,90,50,59	18,13,10,15	54,31,51,41	2,8,0,1	168	149	4.13353e-05	0.0017335	0.75,0.86,0.816,0.777	0.96,0.775,1.0,0.973	-0.126
466	ENSMUSG00000006958.14	Chrd	chr16	+	20733464	20733634	20733530	20733634	20733128	20733295	466	2,1,5,4	0,0,2,2	2,5,0,2	0,7,1,4	215	149	0.00712852	0.0839164	1.0,1.0,0.634,0.581	1.0,0.331,0.0,0.257	0.407
493	ENSMUSG00000003527.9	Ess2	chr16	-	17907749	17907922	17907749	17907919	17909904	17910000	493	10,28,22,34	4,3,3,2	21,12,21,16	4,5,12,4	152	149	0.00917623	0.09748	0.71,0.901,0.878,0.943	0.837,0.702,0.632,0.797	0.116
514	ENSMUSG00000056851.14	Pcbp2	chr15	+	102489751	102489807	102489754	102489807	102488204	102488277	514	27,34,51,41	0,0,2,4	32,24,47,48	5,7,11,0	152	149	0.000256589	0.0072341	1.0,1.0,0.962,0.909	0.863,0.771,0.807,1.0	0.107
536	ENSMUSG00000022992.17	Kansl2	chr15	-	98528862	98529029	98528862	98529025	98529285	98529453	536	4,5,6,4	0,1,0,1	0,0,0,0	3,2,2,1	153	149	0	0	1.0,0.83,1.0,0.796	0.0,0.0,0.0,0.0	0.907
547	ENSMUSG00000036158.12	Prickle1	chr15	-	93512449	93512636	93512449	93512633	93595693	93595891	547	1,1,4,3	3,0,0,6	1,1,6,8	0,0,0,2	152	149	0.00098795	0.0197296	0.246,1.0,1.0,0.329	1.0,1.0,1.0,0.797	-0.305
553	ENSMUSG00000015377.10	Dennd6b	chr15	-	89186955	89187050	89186955	89186998	89187147	89187243	553	7,4,4,7	3,0,0,4	22,5,14,4	3,1,0,0	201	149	0.00486075	0.0639522	0.634,1.0,1.0,0.565	0.845,0.788,1.0,1.0	-0.109
558	ENSMUSG00000022387.17	Brd1	chr15	-	88700772	88701270	88700772	88700877	88707033	88707294	558	50,63,61,48	19,13,24,11	39,32,44,14	18,36,14,11	298	149	0.0147529	0.139425	0.568,0.708,0.56,0.686	0.52,0.308,0.611,0.389	0.173
565	ENSMUSG00000022897.15	Dyrk1a	chr16	+	94663741	94663861	94663768	94663861	94659496	94659693	565	26,11,16,11	25,29,40,41	20,10,27,27	11,18,6,11	176	149	0.000476524	0.0113235	0.468,0.243,0.253,0.185	0.606,0.32,0.792,0.675	-0.311
595	ENSMUSG00000022552.16	Sharpin	chr15	-	76347663	76347807	76347663	76347789	76347895	76348004	595	1,16,16,51	10,0,1,9	15,9,33,17	0,0,1,2	167	149	0.00131101	0.0240352	0.082,1.0,0.935,0.835	1.0,1.0,0.967,0.884	-0.25
638	ENSMUSG00000022206.7	Npr3	chr15	-	11846297	11846385	11846297	11846382	11848468	11848604	638	5,0,3,0	3,8,4,1	1,5,2,5	1,7,0,3	152	149	0.0466711	0.316966	0.62,0.0,0.424,0.0	0.495,0.412,1.0,0.62	-0.371
641	ENSMUSG00000054263.12	Lifr	chr15	+	7185066	7185733	7185565	7185733	7184716	7184818	641	137,105,89,135	33,53,39,62	202224000000	28,26,46,31	298	149	1.5648e-08	2.66935e-06	0.675,0.498,0.533,0.521	0.783,0.812,0.732,0.76	-0.215
656	ENSMUSG00000022119.15	Rbm26	chr14	-	105140315	105140447	105140315	105140438	105141195	105141360	656	24,40,44,51	2,5,5,1	18,19,35,31	7,2,10,10	158	149	0.000365392	0.00946559	0.919,0.883,0.892,0.98	0.708,0.9,0.767,0.745	0.138
662	ENSMUSG00000022016.16	Akap11	chr14	-	78502938	78503025	78502938	78503022	78507724	78507880	662	13,38,25,24	4,5,0,10	19,10,29,10	9,7,22,0	152	149	0.0403701	0.289721	0.761,0.882,1.0,0.702	0.674,0.583,0.564,1.0	0.131
670	ENSMUSG00000022098.10	Bmp1	chr14	-	70486146	70486930	70486146	70486272	70490019	70490200	670	50,59,93,25	117131000000	101124000000	160180000000	298	149	5.85129e-06	0.000327185	0.176,0.184,0.252,0.065	0.24,0.256,0.321,0.284	-0.106
672	ENSMUSG00000002496.10	Tsc2	chr17	-	24604827	24604992	24604827	24604989	24607436	24607531	672	7,15,10,8	7,26,12,4	15,3,23,18	9,6,1,6	152	149	0.0301109	0.237207	0.495,0.361,0.45,0.662	0.62,0.329,0.958,0.746	-0.171
673	ENSMUSG00000034327.17	Kctd9	chr14	+	67729223	67729409	67729350	67729409	67728649	67728746	673	3,5,0,14	38,44,32,16	1,7,14,12	20,17,17,10	276	149	0.00761178	0.0871587	0.041,0.058,0.0,0.321	0.026,0.182,0.308,0.393	-0.122
680	ENSMUSG00000021945.9	Zmym2	chr14	+	56956179	56956294	56956225	56956294	56950176	56950328	680	34,53,42,63	1,0,3,5	45,42,59,24	8,4,2,9	195	149	0.0031937	0.0459865	0.963,1.0,0.915,0.906	0.811,0.889,0.958,0.671	0.114
702	ENSMUSG00000022185.19	Acin1	chr14	-	54646702	54646836	54646702	54646833	54648087	54648130	702	71,39,43,26	19,15,13,21	13,57,29,31	7,13,7,0	152	149	0.0403875	0.289721	0.786,0.718,0.764,0.548	0.645,0.811,0.802,1.0	-0.111
728	ENSMUSG00000035953.14	Pip4p1	chr14	-	50929005	50929307	50929005	50929058	50929583	50929690	728	87,93,69,49	13,5,11,2	87,77,81,74	1,2,2,2	298	149	9.0066e-06	0.000472143	0.77,0.903,0.758,0.925	0.978,0.951,0.953,0.949	-0.119
743	ENSMUSG00000021792.15	Prxl2a	chr14	-	41004040	41004220	41004040	41004203	41013625	41013771	743	49,30,17,41	36,24,32,38	13,10,15,8	34,21,37,16	166	149	0.000473765	0.0113235	0.55,0.529,0.323,0.492	0.256,0.299,0.267,0.31	0.191
763	ENSMUSG00000007817.15	Zmiz1	chr14	+	25646716	25647007	25646734	25647007	25645658	25645857	763	12,21,10,1	27,15,40,10	11,11,20,15	28,3,16,1	167	149	0.00897658	0.0965565	0.284,0.555,0.182,0.082	0.26,0.766,0.527,0.93	-0.345
785	ENSMUSG00000039704.7	Lmbrd2	chr15	+	9175123	9175305	9175258	9175305	9172056	9172240	785	73,55,21,48	0,4,2,3	80,58,43,51	0,16,4,13	284	149	0.00461183	0.0616252	1.0,0.878,0.846,0.894	1.0,0.655,0.849,0.673	0.11
868	ENSMUSG00000021431.15	Snrnp48	chr13	+	38214604	38216513	38216324	38216513	38211066	38211141	868	12,9,8,10	32,27,14,32	19,8,5,8	9,13,9,9	298	149	0.00837768	0.0924117	0.158,0.143,0.222,0.135	0.514,0.235,0.217,0.308	-0.154
897	ENSMUSG00000021302.10	Ggps1	chr13	-	14059318	14059457	14059318	14059450	14063205	14063413	897	2,14,7,4	3,2,0,1	3,0,1,3	2,5,0,2	156	149	0.0454411	0.312407	0.389,0.87,1.0,0.793	0.589,0.0,1.0,0.589	0.219
933	ENSMUSG00000024948.15	Map4k2	chr19	+	6341743	6341834	6341766	6341834	6341458	6341516	933	14,12,21,4	2,0,2,0	33,33,22,11	3,1,3,8	172	149	0.00687174	0.0814653	0.858,1.0,0.901,1.0	0.905,0.966,0.864,0.544	0.12
1010	ENSMUSG00000041297.8	Cdk13	chr13	-	17719355	17719805	17719355	17719625	17721087	17721293	1010	45,85,57,64	15,32,20,10	45,23,72,71	48,13,31,24	298	149	0.0235433	0.198462	0.6,0.57,0.588,0.762	0.319,0.469,0.537,0.597	0.149
1027	ENSMUSG00000021144.14	Mta1	chr12	+	113131315	113131467	113131362	113131467	113130884	113131000	1027	81,119,84,156	11,9,16,24	108107000000	5,6,1,3	196	149	1.72618e-07	2.19427e-05	0.848,0.91,0.8,0.832	0.943,0.931,0.988,0.966	-0.11
1065	ENSMUSG00000079179.9	Rab10os	chr12	+	3238028	3238112	3238063	3238112	3237590	3237660	1065	52,11,17,35	2,3,6,8	10,18,22,11	2,0,1,0	184	149	0.000107358	0.00367535	0.955,0.748,0.696,0.78	0.802,1.0,0.947,1.0	-0.142
1085	ENSMUSG00000025372.16	Baiap2	chr11	+	119996888	119997090	119997008	119997090	119996522	119996747	1085	147154000000	11,27,47,16	138213000000	0,11,10,8	269	149	2.15112e-07	2.36506e-05	0.881,0.76,0.681,0.875	1.0,0.915,0.924,0.915	-0.139
1122	ENSMUSG00000018727.19	Cpsf4l	chr11	-	113699835	113699982	113699835	113699913	113702055	113702095	1122	31,10,18,17	6,3,3,0	44,17,42,21	16,6,12,4	218	149	0.0383965	0.280044	0.779,0.695,0.804,1.0	0.653,0.659,0.705,0.782	0.12
1147	ENSMUSG00000017309.11	Cd300lg	chr11	+	102046853	102047187	102047105	102047187	102046066	102046198	1147	27,17,32,21	3,6,7,4	23,16,18,16	0,0,0,2	298	149	4.57071e-07	3.93199e-05	0.818,0.586,0.696,0.724	1.0,1.0,1.0,0.8	-0.244
1150	ENSMUSG00000034947.13	Tmem106a	chr11	+	101582500	101582704	101582624	101582704	101582241	101582325	1150	7,26,8,13	0,2,1,0	2,11,11,21	7,0,6,5	273	149	3.78772e-05	0.00165036	1.0,0.876,0.814,1.0	0.135,1.0,0.5,0.696	0.34
1160	ENSMUSG00000019302.16	Atp6v0a1	chr11	+	101026659	101026763	101026680	101026763	101021053	101021182	1160	21,19,24,51	31,37,33,55	24,26,74,53	25,37,35,34	170	149	0.023657	0.198921	0.373,0.31,0.389,0.448	0.457,0.381,0.65,0.577	-0.136
1218	ENSMUSG00000020716.16	Nf1	chr11	+	79565417	79565551	79565420	79565551	79564823	79564946	1218	14,14,4,25	1,3,3,4	25,7,8,12	2,0,0,3	152	149	0.0276346	0.223407	0.932,0.821,0.567,0.86	0.925,1.0,1.0,0.797	-0.135
1243	ENSMUSG00000040447.15	Spns2	chr11	-	72453553	72453714	72453553	72453600	72454053	72454217	1243	13,18,8,9	47,57,58,41	6,16,15,34	41,52,29,25	263	149	0.0303939	0.238354	0.135,0.152,0.072,0.111	0.077,0.148,0.227,0.435	-0.104
1250	ENSMUSG00000057054.11	Inca1	chr11	-	70695863	70696043	70695863	70695948	70700057	70700155	1250	3,19,5,11	14,18,17,11	27,19,33,56	25,22,37,32	244	149	0.0300947	0.237207	0.116,0.392,0.152,0.379	0.397,0.345,0.353,0.517	-0.143
1251	ENSMUSG00000040712.16	Camta2	chr11	-	70683278	70683365	70683278	70683350	70683889	70684025	1251	2,9,16,15	12,30,21,48	6,6,8,5	61,24,58,42	164	149	0.00163125	0.0281948	0.132,0.214,0.409,0.221	0.082,0.185,0.111,0.098	0.125
1294	ENSMUSG00000042709.15	Atpaf2	chr11	-	60405775	60405877	60405775	60405856	60407293	60407391	1294	12,19,17,10	55,74,67,79	5,2,4,2	77,45,62,46	170	149	1.17434e-06	7.87985e-05	0.161,0.184,0.182,0.1	0.054,0.037,0.054,0.037	0.111
1295	ENSMUSG00000032633.12	Flcn	chr11	-	59795140	59795575	59795140	59795264	59795749	59795863	1295	22,21,31,22	36,32,19,29	12,29,13,16	30,42,43,31	298	149	0.0230772	0.195023	0.234,0.247,0.449,0.275	0.167,0.257,0.131,0.205	0.111
1296	ENSMUSG00000020472.14	Zkscan17	chr11	-	59503383	59503810	59503383	59503763	59504147	59504254	1296	58,29,83,14	1,0,8,0	20,45,33,16	2,5,4,10	196	149	0.00130058	0.0239751	0.978,1.0,0.887,1.0	0.884,0.872,0.862,0.549	0.175
1345	ENSMUSG00000020460.15	Rps27a	chr11	-	29546702	29547260	29546702	29546788	29547680	29547745	1345	1543,1144,80,1154	0,2,6,0	35,25,76,18	0,7,1,4	298	149	1.00069e-05	0.000512551	1.0,0.997,0.87,1.0	1.0,0.641,0.974,0.692	0.14
1406	ENSMUSG00000020166.15	Cnot2	chr10	-	116549032	116549175	116549032	116549105	116581452	116581483	1406	38,24,21,22	0,1,2,0	21,37,16,10	2,4,0,8	219	149	0.000165677	0.00505315	1.0,0.942,0.877,1.0	0.877,0.863,1.0,0.46	0.155
1420	ENSMUSG00000005682.9	Pan2	chr10	+	128315486	128315657	128315513	128315657	128315097	128315236	1420	7,7,14,11	12,10,9,9	11,9,4,8	35,32,7,13	176	149	0.00671854	0.081091	0.331,0.372,0.568,0.509	0.21,0.192,0.326,0.343	0.177
1444	ENSMUSG00000019948.4	Actr6	chr10	-	89725767	89725953	89725767	89725903	89726636	89726760	1444	6,1,8,4	29,41,18,20	5,0,3,0	54,16,33,27	199	149	0.00412443	0.0555722	0.134,0.018,0.25,0.13	0.065,0.0,0.064,0.0	0.101
1501	ENSMUSG00000042570.14	Mier2	chr10	-	79549536	79549853	79549536	79549679	79550315	79550406	1501	4,8,1,11	18,7,9,25	2,0,0,4	29,11,31,7	298	149	0.000110086	0.0037307	0.1,0.364,0.053,0.18	0.033,0.0,0.0,0.222	0.111
1560	ENSMUSG00000029370.10	Rassf6	chr5	-	90608798	90608992	90608798	90608953	90609714	90609812	1560	9,14,14,21	0,0,0,1	3,9,6,6	4,0,1,4	188	149	2.32394e-05	0.00108289	1.0,1.0,1.0,0.943	0.373,1.0,0.826,0.543	0.3
1563	ENSMUSG00000055204.15	Ankrd17	chr5	-	90278242	90278391	90278242	90278388	90285040	90285143	1563	29,24,46,58	5,3,0,6	71,21,59,34	8,8,19,9	152	149	0.000927782	0.0190526	0.85,0.887,1.0,0.905	0.897,0.72,0.753,0.787	0.121
1584	ENSMUSG00000024924.14	Vldlr	chr19	+	27241234	27241453	27241299	27241453	27240465	27240637	1584	4,26,10,25	0,5,6,0	5,14,22,8	0,0,0,0	214	149	2.69469e-05	0.00120543	1.0,0.784,0.537,1.0	1.0,1.0,1.0,1.0	-0.17
1726	ENSMUSG00000032064.17	Dixdc1	chr9	-	50682032	50682626	50682032	50682200	50683724	50683796	1726	15,18,28,14	5,9,7,5	17,29,13,32	0,0,1,2	298	149	2.94299e-09	7.05266e-07	0.6,0.5,0.667,0.583	1.0,1.0,0.867,0.889	-0.352
1752	ENSMUSG00000043411.15	Usp48	chr4	+	137625156	137625287	137625159	137625287	137623273	137623388	1752	3,17,7,17	37,40,28,56	18,19,9,28	42,15,50,34	152	149	0.0355751	0.270645	0.074,0.294,0.197,0.229	0.296,0.554,0.15,0.447	-0.163
1767	ENSMUSG00000007880.16	Arid1a	chr4	-	133687203	133687379	133687203	133687376	133687537	133687670	1767	5,2,2,0	39,30,57,17	9,6,2,4	10,28,15,16	152	149	0.00022196	0.00641962	0.112,0.061,0.033,0.0	0.469,0.174,0.116,0.197	-0.188
1770	ENSMUSG00000037692.14	Ahdc1	chr4	+	133060661	133060892	133060675	133060892	133055012	133055203	1770	0,0,0,0	12,10,1,1	0,0,9,1	15,3,13,8	163	149	0.000390544	0.00985169	0.0,0.0,0.0,0.0	0.0,0.0,0.388,0.103	-0.123
1796	ENSMUSG00000023051.11	Tarbp2	chr15	+	102521120	102521213	102521137	102521213	102519121	102519291	1796	15,12,22,16	0,4,1,6	13,8,20,9	0,0,4,0	166	149	0.00699573	0.0826433	1.0,0.729,0.952,0.705	1.0,1.0,0.818,1.0	-0.108
1850	ENSMUSG00000063455.16	D630045J12Rik	chr6	-	38136833	38136994	38136833	38136991	38139422	38139469	1850	0,2,1,0	1,0,2,3	0,5,1,3	1,6,0,0	152	149	0.000513849	0.0118894	0.0,1.0,0.329,0.0	0.0,0.45,1.0,1.0	-0.28
2017	ENSMUSG00000048000.15	Gigyf2	chr1	+	87406983	87407201	87407001	87407201	87403666	87403846	2017	32,3,27,20	19,11,15,12	7,27,16,1	2,15,2,0	167	149	0.0299013	0.237207	0.6,0.196,0.616,0.598	0.757,0.616,0.877,1.0	-0.31
2032	ENSMUSG00000040842.17	Szrd1	chr4	-	141118526	141118781	141118526	141118778	141120323	141120373	2032	33,43,29,28	20,17,19,11	75,44,27,24	0,5,6,0	152	149	9.07933e-11	3.80764e-08	0.618,0.713,0.599,0.714	1.0,0.896,0.815,1.0	-0.267
2066	ENSMUSG00000029238.11	Clock	chr5	-	76229357	76229563	76229357	76229560	76230164	76230359	2066	18,23,18,35	16,20,12,23	22,30,54,52	12,5,32,21	152	149	0.0250082	0.206656	0.524,0.53,0.595,0.599	0.642,0.855,0.623,0.708	-0.145
2085	ENSMUSG00000025437.15	Usp33	chr3	+	152374890	152374985	152374914	152374985	152374619	152374789	2085	21,45,37,26	24,27,23,24	25,42,35,26	13,10,21,15	173	149	0.0428442	0.299956	0.43,0.589,0.581,0.483	0.624,0.783,0.589,0.599	-0.128
2097	ENSMUSG00000022587.14	Ly6e	chr15	+	74955482	74955717	74955566	74955717	74955050	74955335	2097	7,5,11,0	6,8,6,3	0,1,0,2	1,2,2,1	233	149	0.00199399	0.0321627	0.427,0.286,0.54,0.0	0.0,0.242,0.0,0.561	0.113
2125	ENSMUSG00000053819.16	Camk2d	chr3	+	126801723	126801761	126801726	126801761	126798237	126798280	2125	33,15,28,15	0,2,0,1	8,9,16,16	3,0,1,6	152	149	0.00061801	0.0139156	1.0,0.88,1.0,0.936	0.723,1.0,0.94,0.723	0.108
2133	ENSMUSG00000035798.14	Zdhhc17	chr10	-	110967683	110967846	110967683	110967805	110968428	110968493	2133	22,18,15,20	3,4,3,0	35,13,18,13	0,0,0,0	190	149	5.37463e-05	0.00214665	0.852,0.779,0.797,1.0	1.0,1.0,1.0,1.0	-0.143
2139	ENSMUSG00000014599.10	Csf1	chr3	-	107748153	107749169	107748153	107748284	107750310	107750458	2139	23,49,71,48	0,0,2,4	26,31,20,27	0,5,5,4	298	149	0.00124193	0.0231482	1.0,1.0,0.947,0.857	1.0,0.756,0.667,0.771	0.153
2191	ENSMUSG00000034602.15	Mon2	chr10	-	123031039	123031124	123031039	123031121	123032522	123032749	2191	13,5,10,7	43,39,32,51	15,19,32,20	20,44,46,42	152	149	6.62202e-05	0.00252464	0.229,0.112,0.234,0.119	0.424,0.297,0.405,0.318	-0.187
2217	ENSMUSG00000053158.10	Fes	chr7	-	80379610	80379734	80379610	80379704	80379817	80379912	2217	18,10,21,16	2,4,2,0	18,27,10,17	0,0,0,0	179	149	0.00250731	0.038765	0.882,0.675,0.897,1.0	1.0,1.0,1.0,1.0	-0.137
2263	ENSMUSG00000028057.14	Rit1	chr3	+	88717572	88717658	88717601	88717658	88717325	88717470	2263	0,11,0,7	46,67,52,68	12,13,13,4	44,31,44,49	178	149	7.83944e-05	0.00285884	0.0,0.121,0.0,0.079	0.186,0.26,0.198,0.064	-0.127
2276	ENSMUSG00000004896.16	Rrnad1	chr3	-	87927562	87927755	87927562	87927715	87927923	87928048	2276	11,13,13,3	0,0,5,0	4,7,0,2	2,4,4,1	189	149	0.000308002	0.00820117	1.0,1.0,0.672,1.0	0.612,0.58,0.0,0.612	0.467
2290	ENSMUSG00000028573.18	Fggy	chr4	+	95820881	95822125	95821977	95822125	95812107	95812169	2290	20,8,6,23	80,57,61,101	36,15,34,43	63,70,101,40	298	149	8.98204e-05	0.00317208	0.111,0.066,0.047,0.102	0.222,0.097,0.144,0.35	-0.122
2294	ENSMUSG00000033767.14	Tmem131l	chr3	-	83913263	83913388	83913263	83913385	83919450	83919599	2294	25,19,21,21	10,4,1,5	21,35,22,24	0,1,0,0	152	149	1.82447e-08	2.91481e-06	0.71,0.823,0.954,0.805	1.0,0.972,1.0,1.0	-0.17
2325	ENSMUSG00000026812.16	Tsc1	chr2	+	28678951	28679118	28678966	28679118	28678161	28678205	2325	12,17,11,18	7,5,11,2	25,12,20,17	0,0,4,2	164	149	0.000112485	0.00374475	0.609,0.755,0.476,0.891	1.0,1.0,0.82,0.885	-0.244
2336	ENSMUSG00000036503.13	Rnf13	chr3	+	57801717	57802537	57802446	57802537	57796197	57796295	2336	11,9,13,14	15,14,5,9	5,1,1,0	5,10,1,4	298	149	0.00284803	0.0422794	0.268,0.243,0.565,0.437	0.333,0.048,0.333,0.0	0.2
2373	ENSMUSG00000057406.16	Nsd2	chr5	+	33867573	33867658	33867576	33867658	33864659	33864778	2373	23,16,12,28	7,3,2,3	16,12,12,8	3,0,0,0	152	149	0.000399997	0.00994068	0.763,0.839,0.855,0.901	0.839,1.0,1.0,1.0	-0.12
2420	ENSMUSG00000054277.8	Arfgap3	chr15	-	83310249	83310384	83310249	83310381	83313468	83313612	2420	22,22,12,8	10,2,0,5	5,23,8,8	0,0,0,0	152	149	3.35575e-07	3.31782e-05	0.683,0.915,1.0,0.611	1.0,1.0,1.0,1.0	-0.198
2458	ENSMUSG00000065990.12	Aurkaip1	chr4	+	155831892	155832070	155831982	155832070	155831668	155831766	2458	18,8,14,8	83,34,38,26	6,8,15,8	14,12,34,13	239	149	0.0261814	0.214241	0.119,0.128,0.187,0.161	0.211,0.294,0.216,0.277	-0.101
2474	ENSMUSG00000026074.15	Map4k4	chr1	+	40006670	40006822	40006673	40006822	40004806	40004913	2474	61,67,66,51	14,4,5,2	11,17,11,15	5,5,3,2	152	149	0.0345001	0.265477	0.81,0.943,0.928,0.962	0.683,0.769,0.782,0.88	0.132
2496	ENSMUSG00000078350.11	Smim1	chr4	-	154023687	154023887	154023687	154023817	154025503	154025621	2496	5,6,2,9	11,0,2,1	0,8,0,1	7,12,1,1	219	149	0.00232559	0.0368036	0.236,1.0,0.405,0.86	0.0,0.312,0.0,0.405	0.446
2497	ENSMUSG00000078350.11	Smim1	chr4	-	154023687	154023891	154023687	154023817	154025503	154025621	2497	12,22,4,21	11,0,2,1	0,23,0,2	7,12,1,1	223	149	0.0013671	0.0249272	0.422,1.0,0.572,0.933	0.0,0.562,0.0,0.572	0.448
2514	ENSMUSG00000038271.17	Iffo1	chr6	+	125151794	125152771	125152613	125152771	125151384	125151525	2514	14,14,19,36	0,11,4,8	13,25,45,17	0,2,0,0	298	149	3.34121e-07	3.31782e-05	1.0,0.389,0.704,0.692	1.0,0.862,1.0,1.0	-0.269
2515	ENSMUSG00000038271.17	Iffo1	chr6	+	125152443	125152771	125152613	125152771	125151384	125151525	2515	13,6,7,27	0,11,4,8	3,12,14,11	0,2,0,0	298	149	3.81186e-06	0.000228372	1.0,0.214,0.467,0.628	1.0,0.75,1.0,1.0	-0.36
2521	ENSMUSG00000030409.16	Dmpk	chr7	+	19092417	19092632	19092542	19092632	19092207	19092254	2521	31,40,32,29	43,65,55,33	21,54,18,12	26,27,27,8	274	149	0.0472054	0.319303	0.282,0.251,0.24,0.323	0.305,0.521,0.266,0.449	-0.111
2544	ENSMUSG00000056492.6	Adgrf5	chr17	+	43439675	43440160	43439950	43440160	43437515	43437686	2544	17,35,33,32	17,37,45,14	34,26,30,22	14,10,17,9	298	149	0.0068039	0.0812351	0.333,0.321,0.268,0.533	0.548,0.565,0.469,0.55	-0.169
2569	ENSMUSG00000003299.10	Mrpl4	chr9	+	21007327	21007540	21007363	21007540	21006826	21006856	2569	0,6,6,6	6,0,5,3	2,2,9,1	0,0,0,0	185	149	8.69272e-08	1.268e-05	0.0,1.0,0.491,0.617	1.0,1.0,1.0,1.0	-0.473
2581	ENSMUSG00000026708.16	Cenpl	chr1	+	161078228	161078480	161078328	161078480	161074756	161074930	2581	16,21,13,18	7,3,4,5	23,25,20,3	3,0,1,0	249	149	2.57956e-05	0.00116952	0.578,0.807,0.66,0.683	0.821,1.0,0.923,1.0	-0.254
2582	ENSMUSG00000042396.10	Rbm7	chr9	-	48488700	48490938	48488700	48489988	48493406	48493494	2582	180184000000	1,9,9,9	143,129,138,99	13,13,24,18	298	149	1.48501e-07	1.99288e-05	0.989,0.911,0.905,0.91	0.846,0.832,0.742,0.733	0.14
2583	ENSMUSG00000066800.11	Rnasel	chr1	+	153753606	153755213	153753634	153755213	153752844	153752947	2583	25,11,8,13	2,4,3,2	9,16,10,3	0,0,0,0	177	149	1.80846e-06	0.00011668	0.913,0.698,0.692,0.845	1.0,1.0,1.0,1.0	-0.213
2676	ENSMUSG00000070643.11	Sox13	chr1	-	133388448	133388563	133388448	133388560	133388928	133388997	2676	8,15,11,12	1,2,6,3	0,0,5,12	5,2,5,4	152	149	0.00230288	0.0366169	0.887,0.88,0.642,0.797	0.0,0.0,0.495,0.746	0.491
2717	ENSMUSG00000026339.18	Ccdc93	chr1	+	121462232	121462283	121462235	121462283	121461886	121461979	2717	5,12,4,18	4,0,1,3	14,28,10,5	1,0,0,0	152	149	0.00106857	0.0208672	0.551,1.0,0.797,0.855	0.932,1.0,1.0,1.0	-0.182
2762	ENSMUSG00000023150.14	Ivns1abp	chr1	+	151355166	151356236	151356128	151356236	151354633	151354759	2762	106152000000	64,44,37,104	135,97,139,118	115,48,137,103	298	149	0.0194141	0.172313	0.453,0.633,0.698,0.358	0.37,0.503,0.337,0.364	0.142
2799	ENSMUSG00000006010.14	Odr4	chr1	-	150388522	150388657	150388522	150388619	150390235	150390356	2799	56,76,46,72	10,15,16,1	87,76,66,68	4,6,3,0	187	149	4.24924e-05	0.00176002	0.817,0.801,0.696,0.983	0.945,0.91,0.946,1.0	-0.126
2812	ENSMUSG00000028582.14	Cc2d1b	chr4	+	108625333	108625533	108625407	108625533	108624845	108625004	2812	1,5,6,1	1,13,17,18	0,0,1,0	16,21,20,6	223	149	1.0083e-05	0.000512551	0.401,0.204,0.191,0.036	0.0,0.0,0.032,0.0	0.2
2817	ENSMUSG00000028911.16	Srsf4	chr4	+	131886106	131886304	131886130	131886304	131885308	131885492	2817	4,3,7,3	18,32,31,11	0,0,2,0	13,21,23,5	173	149	1.30202e-05	0.000642394	0.161,0.075,0.163,0.19	0.0,0.0,0.07,0.0	0.13
2903	ENSMUSG00000034343.14	Ube2f	chr1	+	91254214	91254393	91254262	91254393	91253759	91253827	2903	3,6,8,2	0,3,0,0	0,2,0,4	2,3,2,5	197	149	1.29648e-07	1.81237e-05	1.0,0.602,1.0,1.0	0.0,0.335,0.0,0.377	0.722
2904	ENSMUSG00000034343.14	Ube2f	chr1	+	91254259	91254393	91254262	91254393	91253759	91253827	2904	14,10,24,6	0,3,0,0	10,2,1,2	2,3,2,5	152	149	6.07278e-07	4.74198e-05	1.0,0.766,1.0,1.0	0.831,0.395,0.329,0.282	0.482
2943	ENSMUSG00000070565.11	Rasal2	chr1	-	157158658	157158858	157158658	157158837	157161124	157161326	2943	3,18,0,10	13,16,9,9	0,1,0,0	18,18,11,23	170	149	7.59745e-09	1.49938e-06	0.168,0.496,0.0,0.493	0.0,0.046,0.0,0.0	0.278
2985	ENSMUSG00000049624.14	Slc17a5	chr9	-	78574649	78574753	78574649	78574737	78577029	78577263	2985	9,7,6,8	36,31,29,16	1,0,7,1	52,55,35,24	165	149	6.27263e-06	0.000344995	0.184,0.169,0.157,0.311	0.017,0.0,0.153,0.036	0.154
2997	ENSMUSG00000002265.17	Peg3	chr7	-	6718425	6718848	6718425	6718556	6726489	6726574	2997	1,4,1,2	4,5,1,3	2,4,8,1	1,4,1,0	298	149	0.0177748	0.162936	0.111,0.286,0.333,0.25	0.5,0.333,0.8,1.0	-0.413
3015	ENSMUSG00000033124.16	Atg9a	chr1	-	75186189	75187186	75186189	75186938	75187684	75187826	3015	51,24,12,21	81,103,72,72	4,7,4,17	116105000000	298	149	1.89996e-11	9.10623e-09	0.239,0.104,0.077,0.127	0.017,0.032,0.016,0.074	0.102
3034	ENSMUSG00000027206.13	Cops2	chr2	-	125842621	125842732	125842621	125842711	125844809	125844935	3034	72,50,33,109	50,96,69,104	26,50,39,54	103,71,89,110	170	149	0.0188072	0.169427	0.558,0.313,0.295,0.479	0.181,0.382,0.277,0.301	0.126
3048	ENSMUSG00000040675.17	Mthfd1l	chr10	+	4155541	4156111	4155649	4156111	4148008	4148126	3048	3,21,10,10	0,0,2,4	7,9,15,17	2,2,16,6	257	149	0.00790033	0.088945	1.0,1.0,0.744,0.592	0.67,0.723,0.352,0.622	0.242
3086	ENSMUSG00000027652.15	Ralgapb	chr2	+	158450176	158450310	158450188	158450310	158448319	158448449	3086	5,30,13,6	6,12,9,2	15,15,18,12	2,5,3,5	161	149	0.0359018	0.271471	0.435,0.698,0.572,0.735	0.874,0.735,0.847,0.69	-0.176
3104	ENSMUSG00000020101.14	Vsir	chr10	+	60368528	60368725	60368531	60368725	60367765	60367793	3104	44,20,25,25	7,18,12,7	15,22,14,16	0,4,1,5	152	149	0.00595489	0.0751077	0.86,0.521,0.671,0.778	1.0,0.844,0.932,0.758	-0.176
3157	ENSMUSG00000028864.7	Hgf	chr5	+	16572491	16572634	16572506	16572634	16566746	16566861	3157	51,110,31,93	14,48,24,20	29,38,11,30	7,1,1,4	164	149	0.000175666	0.00526214	0.768,0.676,0.54,0.809	0.79,0.972,0.909,0.872	-0.188
3179	ENSMUSG00000067847.13	Romo1	chr2	+	156144444	156144589	156144458	156144589	156144236	156144285	3179	8,11,5,6	0,4,5,3	6,4,5,5	0,0,0,0	163	149	1.92136e-07	2.22281e-05	1.0,0.715,0.478,0.646	1.0,1.0,1.0,1.0	-0.29
3193	ENSMUSG00000017418.14	Arl5b	chr2	+	15069819	15069967	15069857	15069967	15068138	15068199	3193	28,41,43,31	8,6,5,7	28,18,34,31	0,2,0,1	187	149	4.22251e-07	3.82879e-05	0.736,0.845,0.873,0.779	1.0,0.878,1.0,0.961	-0.152
3194	ENSMUSG00000017418.14	Arl5b	chr2	+	15069836	15069967	15069857	15069967	15068138	15068199	3194	4,8,11,6	8,6,5,7	4,6,6,3	0,2,0,1	170	149	7.67879e-06	0.000408926	0.305,0.539,0.658,0.429	1.0,0.724,1.0,0.724	-0.379
3206	ENSMUSG00000010453.12	Kansl3	chr1	-	36365481	36365632	36365481	36365585	36367749	36368034	3206	20,10,22,11	0,6,0,2	23,17,14,17	0,0,0,0	196	149	0.00300669	0.0440499	1.0,0.559,1.0,0.807	1.0,1.0,1.0,1.0	-0.158
3234	ENSMUSG00000014418.16	Hps5	chr7	-	46767093	46767207	46767093	46767139	46768032	46768152	3234	12,23,14,47	0,3,4,0	38,31,27,41	0,0,0,0	217	149	0.02673	0.217668	1.0,0.84,0.706,1.0	1.0,1.0,1.0,1.0	-0.114
3238	ENSMUSG00000031392.18	Irak1	chrX	-	74017129	74017511	74017129	74017430	74018129	74018366	3238	140,69,84,149	0,0,0,6	55,84,115,64	13,4,11,6	230	149	4.70487e-09	1.05232e-06	1.0,1.0,1.0,0.941	0.733,0.932,0.871,0.874	0.133
3251	ENSMUSG00000042185.14	Nfrkb	chr9	+	31396999	31397137	31397035	31397137	31396322	31396497	3251	1,7,2,15	10,22,10,10	8,7,16,11	0,6,6,9	185	149	0.00106979	0.0208672	0.075,0.204,0.139,0.547	1.0,0.484,0.682,0.496	-0.424
3271	ENSMUSG00000009995.17	Taz	chrX	+	74288447	74288513	74288450	74288513	74288177	74288219	3271	0,10,2,0	64,40,27,44	10,5,13,10	45,55,39,33	152	149	0.000279307	0.00761849	0.0,0.197,0.068,0.0	0.179,0.082,0.246,0.229	-0.118
3287	ENSMUSG00000038126.17	Mphosph9	chr5	-	124320844	124320998	124320844	124320954	124324873	124325137	3287	2,0,1,0	2,1,3,2	4,2,6,0	1,4,0,1	193	149	0.000373249	0.00954997	0.436,0.0,0.205,0.0	0.755,0.279,1.0,0.0	-0.348
3295	ENSMUSG00000026159.13	Agfg1	chr1	+	82894475	82894567	82894481	82894567	82893423	82893582	3295	31,43,32,28	6,22,23,13	68,33,44,23	14,8,8,8	155	149	0.0103232	0.107227	0.832,0.653,0.572,0.674	0.824,0.799,0.841,0.734	-0.117
3310	ENSMUSG00000008855.17	Hdac5	chr11	-	102218415	102218781	102218415	102218487	102219144	102219281	3310	13,23,8,6	7,2,3,2	3,8,7,10	0,0,0,0	298	149	9.57012e-10	2.91889e-07	0.481,0.852,0.571,0.6	1.0,1.0,1.0,1.0	-0.374
3345	ENSMUSG00000027953.13	Slc50a1	chr3	-	89269049	89269298	89269049	89269211	89269826	89270139	3345	7,3,1,10	32,17,22,24	0,0,1,0	14,16,35,16	236	149	3.36232e-07	3.31782e-05	0.121,0.1,0.028,0.208	0.0,0.0,0.018,0.0	0.11
3354	ENSMUSG00000030281.16	Il17rc	chr6	+	113476398	113476538	113476425	113476538	113474552	113474597	3354	58,83,34,87	1,0,5,8	80,58,105,68	9,9,42,11	176	149	3.61801e-06	0.000220698	0.98,1.0,0.852,0.902	0.883,0.845,0.679,0.84	0.122
3363	ENSMUSG00000031278.12	Acsl4	chrX	-	142351378	142351618	142351378	142351615	142360386	142360436	3363	78,114,80,133	23,41,26,47	38,50,58,54	0,1,20,0	152	149	4.51752e-07	3.93199e-05	0.769,0.732,0.751,0.735	1.0,0.98,0.74,1.0	-0.183
3364	ENSMUSG00000031278.12	Acsl4	chrX	-	142351378	142351908	142351378	142351615	142360386	142360436	3364	5,20,19,32	23,41,26,47	24,17,3,8	0,1,20,0	298	149	0.000149668	0.00469287	0.098,0.196,0.268,0.254	1.0,0.895,0.07,1.0	-0.537
3375	ENSMUSG00000039221.10	Rpl22l1	chr3	+	28806499	28806592	28806502	28806592	28805564	28805581	3375	21,13,3,10	4,0,10,0	2,3,3,6	0,0,0,0	152	149	0.000404615	0.00998149	0.837,1.0,0.227,1.0	1.0,1.0,1.0,1.0	-0.234
3502	ENSMUSG00000033540.18	Idua	chr5	+	108680294	108680497	108680394	108680497	108680110	108680206	3502	23,16,37,30	1,0,0,0	9,8,14,18	0,4,3,0	249	149	0.00383402	0.0529347	0.932,1.0,1.0,1.0	1.0,0.545,0.736,1.0	0.163
3595	ENSMUSG00000015790.16	Surf1	chr2	-	26915595	26915769	26915595	26915749	26915954	26916006	3595	13,16,8,5	10,2,11,0	2,2,0,12	13,6,15,3	169	149	0.00253123	0.0389553	0.534,0.876,0.391,1.0	0.119,0.227,0.0,0.779	0.419
3596	ENSMUSG00000015790.16	Surf1	chr2	-	26915595	26915784	26915595	26915749	26915954	26916006	3596	4,3,1,8	10,2,11,0	0,2,0,2	13,6,15,3	184	149	0.000342155	0.00896821	0.245,0.548,0.069,1.0	0.0,0.213,0.0,0.351	0.325
3669	ENSMUSG00000075376.10	Rc3h2	chr2	-	37389584	37389890	37389584	37389774	37399586	37399705	3669	26,36,23,17	0,0,0,0	16,16,18,10	0,0,0,8	265	149	0.0215956	0.185303	1.0,1.0,1.0,1.0	1.0,1.0,1.0,0.413	0.147
3683	ENSMUSG00000035875.15	AI182371	chr2	-	35097887	35098083	35097887	35098080	35100854	35101008	3683	6,14,10,16	0,12,1,1	33,16,49,26	10,10,24,34	152	149	0.0113982	0.114687	1.0,0.534,0.907,0.94	0.764,0.611,0.667,0.428	0.228
3718	ENSMUSG00000054499.9	Dedd2	chr7	-	25218800	25219167	25218800	25219031	25219763	25219927	3718	84,30,47,35	0,8,9,2	30,56,41,25	1,0,0,0	285	149	6.56633e-07	5.00682e-05	1.0,0.662,0.732,0.901	0.94,1.0,1.0,1.0	-0.161
3733	ENSMUSG00000060373.15	Hnrnpc	chr14	-	52075254	52075436	52075254	52075412	52075612	52075726	3733	79180107171	66,55,36,75	180110000000	34,13,58,48	173	149	0.000366774	0.00946559	0.508,0.738,0.719,0.663	0.82,0.879,0.781,0.745	-0.149
3734	ENSMUSG00000060373.15	Hnrnpc	chr14	-	52075254	52075436	52075254	52075415	52075612	52075726	3734	79178102168	124205000000	177110000000	124,78,137,99	170	149	2.37699e-13	1.32913e-10	0.358,0.432,0.366,0.35	0.556,0.553,0.6,0.591	-0.198
3784	ENSMUSG00000057110.15	Cntrl	chr2	+	35147231	35147411	35147234	35147411	35145056	35145236	3784	2,30,22,21	0,1,2,2	17,10,7,16	1,4,8,2	152	149	0.00148718	0.0264561	1.0,0.967,0.915,0.911	0.943,0.71,0.462,0.887	0.198
3814	ENSMUSG00000032212.10	Sltm	chr9	+	70573456	70573925	70573510	70573925	70572148	70572176	3814	17,40,17,27	2,13,1,8	23,10,12,11	4,7,12,25	203	149	0.00473977	0.062606	0.862,0.693,0.926,0.712	0.808,0.512,0.423,0.244	0.301
3826	ENSMUSG00000038095.15	Sbno1	chr5	-	124410069	124410382	124410069	124410379	124414398	124414527	3826	18,16,23,15	9,15,7,0	28,28,10,15	0,0,0,8	152	149	0.00195751	0.0318808	0.662,0.511,0.763,1.0	1.0,1.0,1.0,0.648	-0.178
3855	ENSMUSG00000039990.16	Edrf1	chr7	+	133660070	133660294	133660135	133660294	133658425	133658644	3855	24,38,12,22	11,5,2,2	36,26,35,42	0,6,1,4	214	149	0.0226518	0.192886	0.603,0.841,0.807,0.885	1.0,0.751,0.961,0.88	-0.114
3873	ENSMUSG00000002105.15	Slc39a13	chr2	-	91065581	91065739	91065581	91065700	91066012	91066126	3873	24,17,14,14	16,7,13,16	5,17,6,11	11,26,7,15	188	149	0.0225943	0.192885	0.543,0.658,0.46,0.41	0.265,0.341,0.405,0.368	0.173
3914	ENSMUSG00000053286.11	Trmt1l	chr1	+	151448225	151448497	151448253	151448497	151443246	151443326	3914	3,9,9,2	14,13,0,40	0,2,4,1	10,14,26,14	177	149	0.00771643	0.0875491	0.153,0.368,1.0,0.04	0.0,0.107,0.115,0.057	0.321
3925	ENSMUSG00000021189.11	Atxn3	chr12	-	101948003	101948048	101948003	101948045	101948274	101948439	3925	17,1,12,1	6,0,6,1	9,23,1,11	0,0,1,0	152	149	1.17082e-05	0.000586283	0.735,1.0,0.662,0.495	1.0,1.0,0.495,1.0	-0.151
3934	ENSMUSG00000037174.18	Elf2	chr3	-	51264868	51265042	51264868	51265006	51266752	51266866	3934	32,36,17,13	36,74,39,59	7,13,14,12	59,34,90,48	185	149	0.00124971	0.0231644	0.417,0.282,0.26,0.151	0.087,0.235,0.111,0.168	0.127
3951	ENSMUSG00000037266.18	Rsrp1	chr4	+	134926025	134926818	134926734	134926818	134925776	134925821	3951	108222000000	8,22,7,14	247,69,354,292	2,0,0,0	298	149	0	0	0.871,0.835,0.884,0.914	0.984,1.0,1.0,1.0	-0.12
3968	ENSMUSG00000018678.13	Sp2	chr11	-	96963364	96963444	96963364	96963441	96977620	96977711	3968	0,0,0,0	2,6,4,4	4,0,0,2	4,3,3,1	152	149	0.0186231	0.168866	0.0,0.0,0.0,0.0	0.495,0.0,0.0,0.662	-0.289
3977	ENSMUSG00000062593.17	Gm49339	chr10	+	51495536	51496059	51495993	51496059	51494792	51494845	3977	13,28,21,33	29,46,25,68	14,18,22,30	13,16,13,24	298	149	0.000499911	0.0117287	0.183,0.233,0.296,0.195	0.35,0.36,0.458,0.385	-0.161
4012	ENSMUSG00000028522.16	Mier1	chr4	+	103118238	103118315	103118280	103118315	103115559	103115660	4012	6,7,25,13	1,0,0,0	10,13,6,11	0,2,3,2	191	149	0.00499348	0.0649346	0.824,1.0,1.0,1.0	1.0,0.835,0.609,0.811	0.142
4013	ENSMUSG00000028522.16	Mier1	chr4	+	103118241	103118315	103118280	103118315	103115559	103115660	4013	8,5,21,7	1,0,0,0	7,6,5,6	0,2,3,2	188	149	0.000849287	0.0180339	0.864,1.0,1.0,1.0	1.0,0.704,0.569,0.704	0.222
4032	ENSMUSG00000058318.15	Phf21a	chr2	+	92326912	92327164	92326915	92327164	92320228	92320459	4032	10,10,6,29	2,5,8,18	8,8,4,11	14,8,10,18	152	149	0.00903917	0.0968895	0.831,0.662,0.424,0.612	0.359,0.495,0.282,0.375	0.255
4033	ENSMUSG00000058318.15	Phf21a	chr2	+	92328311	92328401	92328314	92328401	92320228	92320459	4033	0,0,2,0	5,20,17,1	2,1,2,1	3,1,9,1	152	149	0.00674312	0.081091	0.0,0.0,0.103,0.0	0.395,0.495,0.179,0.495	-0.365
4061	ENSMUSG00000038145.17	Snrk	chr9	+	122133960	122134076	122133986	122134076	122132627	122132750	4061	15,13,13,2	0,1,0,3	6,6,12,11	6,3,4,8	175	149	0.00022689	0.00645097	1.0,0.917,1.0,0.362	0.46,0.63,0.719,0.539	0.233
4079	ENSMUSG00000059713.12	Rcan3	chr4	-	135412307	135416598	135412307	135412490	135418379	135418551	4079	6,27,13,8	0,0,0,0	8,8,1,9	6,0,0,1	298	149	0.00462878	0.0616252	1.0,1.0,1.0,1.0	0.4,1.0,1.0,0.818	0.196
4093	ENSMUSG00000005687.14	Bcas2	chr3	+	103175618	103177419	103177338	103177419	103174339	103174501	4093	104108000000	16,35,15,20	152131000000	6,0,2,0	298	149	0	0	0.765,0.607,0.779,0.85	0.927,1.0,0.982,1.0	-0.227
4167	ENSMUSG00000024386.9	Proc	chr18	-	32135860	32135951	32135860	32135947	32137947	32138026	4167	7,6,11,1	1,2,4,0	1,22,17,5	0,0,4,0	153	149	0.00338786	0.0481622	0.872,0.745,0.728,1.0	1.0,1.0,0.805,1.0	-0.115
4246	ENSMUSG00000014668.15	Chfr	chr5	+	110140353	110140453	110140375	110140453	110140116	110140189	4246	9,16,0,19	1,0,13,0	10,14,29,18	0,2,0,1	171	149	0.0207916	0.181184	0.887,1.0,0.0,1.0	1.0,0.859,1.0,0.94	-0.228
4263	ENSMUSG00000060261.15	Gtf2i	chr5	-	134243506	134243599	134243506	134243587	134243900	134243956	4263	38,41,13,90	38,68,35,116	115,76,95,79	63,55,91,77	161	149	0.00192808	0.0315547	0.481,0.358,0.256,0.418	0.628,0.561,0.491,0.487	-0.164
4338	ENSMUSG00000067825.11	Pex26	chr6	+	121193511	121196185	121193514	121196185	121190100	121190247	4338	32,28,24,17	1,0,5,3	33,29,44,10	7,16,2,5	152	149	0.00453872	0.0609096	0.969,1.0,0.825,0.847	0.822,0.64,0.956,0.662	0.14
4339	ENSMUSG00000006589.8	Aprt	chr8	-	122576118	122576252	122576118	122576231	122576514	122576621	4339	4,9,8,4	7,2,1,1	1,7,3,0	3,3,5,3	170	149	0.0187151	0.169243	0.334,0.798,0.875,0.778	0.226,0.672,0.345,0.0	0.386
4341	ENSMUSG00000041264.16	Uspl1	chr5	+	149193839	149194440	149193897	149194440	149188344	149188473	4341	48,33,22,70	4,6,5,1	21,22,31,16	0,0,0,0	207	149	2.72684e-06	0.000172614	0.896,0.798,0.76,0.981	1.0,1.0,1.0,1.0	-0.141
4361	ENSMUSG00000029638.17	Glcci1	chr6	+	8573181	8573298	8573184	8573298	8558499	8558586	4361	0,0,0,2	1,1,1,4	6,3,0,0	2,5,8,3	152	149	0.00228427	0.036494	0.0,0.0,0.0,0.329	0.746,0.37,0.0,0.0	-0.197
4392	ENSMUSG00000030556.13	Lrrc28	chr7	-	67559857	67560064	67559857	67559969	67579689	67579750	4392	22,9,3,15	2,0,5,0	10,10,5,9	0,0,0,1	244	149	0.0110344	0.112183	0.87,1.0,0.268,1.0	1.0,1.0,1.0,0.846	-0.177
4434	ENSMUSG00000042810.14	Krba1	chr6	+	48405233	48405389	48405236	48405389	48403990	48404140	4434	9,16,27,15	7,4,0,0	15,26,25,18	0,0,0,0	152	149	8.9694e-05	0.00317208	0.558,0.797,1.0,1.0	1.0,1.0,1.0,1.0	-0.161
4443	ENSMUSG00000025813.14	Homer2	chr7	-	81618575	81618715	81618575	81618682	81624251	81624344	4443	0,5,3,5	14,17,35,18	9,13,4,7	7,24,15,8	182	149	0.000398115	0.00994068	0.0,0.194,0.066,0.185	0.513,0.307,0.179,0.417	-0.243
4507	ENSMUSG00000112023.1	Lilr4b	chr10	+	51481139	51481869	51481666	51481869	51480905	51480941	4507	37,88,16,37	7,8,3,10	14,13,2,3	0,0,1,0	298	149	6.85809e-06	0.000371111	0.725,0.846,0.727,0.649	1.0,1.0,0.5,1.0	-0.138
4508	ENSMUSG00000112023.1	Lilr4b	chr10	+	51481566	51481869	51481666	51481869	51480905	51480941	4508	14,37,9,24	7,8,3,10	4,7,2,3	0,0,1,0	249	149	1.47084e-06	9.67583e-05	0.545,0.735,0.642,0.59	1.0,1.0,0.545,1.0	-0.258
4509	ENSMUSG00000112023.1	Lilr4b	chr10	+	51484445	51484569	51484516	51484569	51484098	51484287	4509	9,24,10,8	4,12,2,0	1,1,1,3	1,0,0,0	220	149	3.2485e-05	0.00143404	0.604,0.575,0.772,1.0	0.404,1.0,1.0,1.0	-0.113
4516	ENSMUSG00000068329.12	Htra2	chr6	-	83052697	83052803	83052697	83052726	83053000	83053070	4516	17,12,11,21	0,16,0,0	23,24,23,12	0,0,0,0	226	149	0.00918143	0.09748	1.0,0.331,1.0,1.0	1.0,1.0,1.0,1.0	-0.167
4574	ENSMUSG00000030067.17	Foxp1	chr6	-	99015423	99015513	99015423	99015510	99016527	99016665	4574	13,15,9,8	0,8,6,10	25,22,17,27	4,1,2,2	152	149	0.000969276	0.0194726	1.0,0.648,0.595,0.44	0.86,0.956,0.893,0.93	-0.239
4587	ENSMUSG00000034269.12	Setd5	chr6	+	113110316	113110525	113110373	113110525	113110084	113110221	4587	2,7,7,7	0,10,1,1	3,6,4,3	0,0,0,0	206	149	2.16686e-05	0.00103855	1.0,0.336,0.835,0.835	1.0,1.0,1.0,1.0	-0.248
4652	ENSMUSG00000002395.14	Use1	chr8	+	71367643	71367848	71367769	71367848	71367216	71367369	4652	226217000000	20,6,18,13	214271000000	0,0,4,2	275	149	3.73035e-14	2.50306e-11	0.86,0.951,0.863,0.872	1.0,1.0,0.971,0.981	-0.102
4697	ENSMUSG00000047412.16	Zbtb44	chr9	+	31064178	31064342	31064232	31064342	31062040	31062125	4697	83,123,92,110	28,24,9,14	78,65,63,87	9,3,5,4	203	149	0.000270143	0.00749033	0.685,0.79,0.882,0.852	0.864,0.941,0.902,0.941	-0.11
4700	ENSMUSG00000040370.13	Etfrf1	chr6	+	145214521	145215271	145215183	145215271	145211133	145211476	4700	21,13,12,24	5,15,6,19	16,4,9,14	15,10,11,18	298	149	0.0379774	0.278656	0.677,0.302,0.5,0.387	0.348,0.167,0.29,0.28	0.195
4730	ENSMUSG00000019872.13	Smpdl3a	chr10	+	57800910	57801124	57800915	57801124	57794567	57794849	4730	4,7,13,13	8,0,0,0	10,9,2,8	0,0,0,0	154	149	0.0426284	0.299956	0.326,1.0,1.0,1.0	1.0,1.0,1.0,1.0	-0.168
4763	ENSMUSG00000029070.9	Mxra8	chr4	+	155840905	155841208	155840914	155841208	155840777	155840798	4763	14,25,40,11	14,16,6,0	6,20,5,11	0,0,0,0	158	149	1.0205e-08	1.9021e-06	0.485,0.596,0.863,1.0	1.0,1.0,1.0,1.0	-0.264
4823	ENSMUSG00000031166.13	Wdr13	chrX	-	8131384	8131625	8131384	8131591	8132286	8132366	4823	25,27,32,20	0,4,2,6	14,24,13,12	0,0,0,0	183	149	1.363e-05	0.000662734	1.0,0.846,0.929,0.731	1.0,1.0,1.0,1.0	-0.123
4853	ENSMUSG00000040940.18	Arhgef1	chr7	+	24918519	24919351	24919183	24919351	24917894	24918000	4853	12,30,29,21	0,0,12,0	19,23,19,16	0,0,0,0	298	149	0.000961004	0.0194227	1.0,1.0,0.547,1.0	1.0,1.0,1.0,1.0	-0.113
4918	ENSMUSG00000023262.13	Acy1	chr9	-	106437628	106437737	106437628	106437733	106438132	106438319	4918	1,11,11,5	0,2,0,1	2,4,3,4	0,2,3,1	153	149	0.0143624	0.137282	1.0,0.843,1.0,0.83	1.0,0.661,0.493,0.796	0.181
4933	ENSMUSG00000036733.16	Rbm42	chr7	-	30645666	30645842	30645666	30645821	30647559	30647634	4933	15,25,15,29	42,0,26,6	14,9,27,8	30,24,33,16	170	149	0.017182	0.157962	0.238,1.0,0.336,0.809	0.29,0.247,0.418,0.305	0.281
5057	ENSMUSG00000034911.8	Ushbp1	chr8	-	71390640	71390781	71390640	71390729	71390920	71391054	5057	22,34,20,56	0,0,9,6	20,21,30,17	0,0,1,0	201	149	4.0812e-05	0.00173322	1.0,1.0,0.622,0.874	1.0,1.0,0.957,1.0	-0.115
5160	ENSMUSG00000030929.17	Eri2	chr7	-	119786738	119787485	119786738	119786827	119787733	119787834	5160	14,8,23,15	4,2,1,2	10,6,12,14	0,0,4,0	298	149	0.0327228	0.25296	0.636,0.667,0.92,0.789	1.0,1.0,0.6,1.0	-0.147
5231	ENSMUSG00000025494.8	Sigirr	chr7	-	141094781	141095317	141094781	141094945	141096619	141096739	5231	0,1,5,5	2,11,3,3	3,2,3,5	0,0,4,0	298	149	9.91686e-05	0.00343001	0.0,0.043,0.455,0.455	1.0,1.0,0.273,1.0	-0.58
5260	ENSMUSG00000030846.15	Tial1	chr7	-	128446730	128447107	128446730	128446798	128448120	128448208	5260	20,40,36,14	0,6,1,10	17,10,21,14	3,2,8,14	298	149	0.0320661	0.249032	1.0,0.769,0.947,0.412	0.739,0.714,0.568,0.333	0.194
5274	ENSMUSG00000024457.16	Trim26	chr17	+	36837464	36837572	36837496	36837572	36837140	36837264	5274	8,21,22,1	17,6,14,18	15,39,23,11	11,11,7,4	181	149	0.0132909	0.128504	0.279,0.742,0.564,0.044	0.529,0.745,0.73,0.694	-0.267
5281	ENSMUSG00000036473.16	Tbc1d24	chr17	-	24185203	24186287	24185203	24186201	24189943	24190053	5281	33,25,30,10	2,2,1,0	23,54,19,24	14,3,3,6	235	149	0.000219478	0.00640303	0.913,0.888,0.95,1.0	0.51,0.919,0.801,0.717	0.201
5328	ENSMUSG00000019082.18	Slc25a22	chr7	-	141432020	141432158	141432020	141432139	141432613	141432753	5328	16,13,22,6	16,13,23,28	8,24,6,13	1,1,13,2	168	149	0.00119789	0.0227058	0.47,0.47,0.459,0.16	0.876,0.955,0.29,0.852	-0.353
5335	ENSMUSG00000029472.13	Anapc5	chr5	-	122800450	122800632	122800450	122800593	122802129	122802219	5335	69,108,66,113	59,110,63,93	82112118108	53,51,81,57	188	149	0.000709335	0.0156259	0.481,0.438,0.454,0.491	0.551,0.635,0.536,0.6	-0.115
5345	ENSMUSG00000028060.14	Khdc4	chr3	+	88700260	88700514	88700364	88700514	88699950	88700008	5345	80,215,72,144	12,15,18,16	144,65,120,156	0,5,15,5	253	149	0.000727797	0.0158556	0.797,0.894,0.702,0.841	1.0,0.884,0.825,0.948	-0.106
5395	ENSMUSG00000022340.15	Sybu	chr15	-	44746245	44746462	44746245	44746459	44748308	44748398	5395	10,6,15,7	0,2,0,0	0,14,5,4	7,0,5,0	152	149	0.000788569	0.0169593	1.0,0.746,1.0,1.0	0.0,1.0,0.495,1.0	0.313
5486	ENSMUSG00000007610.15	Gtpbp3	chr8	+	71490654	71490967	71490894	71490967	71490334	71490537	5486	7,4,2,9	14,7,37,24	2,13,11,2	5,12,16,3	298	149	0.00889632	0.0962811	0.2,0.222,0.026,0.158	0.167,0.351,0.256,0.25	-0.104
5498	ENSMUSG00000036990.13	Otud4	chr8	+	79661037	79661135	79661040	79661135	79659397	79659462	5498	20,24,20,25	5,15,14,25	22,24,39,20	0,3,10,9	152	149	0.00108579	0.0210196	0.797,0.611,0.583,0.495	1.0,0.887,0.793,0.685	-0.22
5514	ENSMUSG00000036779.12	Tent4b	chr8	+	88252385	88252573	88252526	88252573	88252181	88252285	5514	102232000000	20,25,38,26	198155000000	20,12,14,17	290	149	0.00608573	0.0761852	0.724,0.827,0.609,0.825	0.836,0.869,0.87,0.823	-0.103
5516	ENSMUSG00000056608.14	Chd9	chr8	+	91034904	91035065	91034907	91035065	91033338	91034244	5516	7,17,9,8	0,4,4,1	12,7,27,16	11,9,13,2	152	149	0.0197707	0.174892	1.0,0.806,0.688,0.887	0.517,0.433,0.671,0.887	0.218
5608	ENSMUSG00000031982.5	Arv1	chr8	+	124728328	124728482	124728368	124728482	124725255	124725375	5608	17,30,12,8	2,4,7,4	2,7,11,11	1,0,0,0	189	149	3.50482e-06	0.000217753	0.87,0.855,0.575,0.612	0.612,1.0,1.0,1.0	-0.175
5646	ENSMUSG00000038895.16	Zfp653	chr9	-	22055992	22056528	22055992	22056092	22057286	22057398	5646	12,43,15,12	0,1,2,4	9,32,31,9	0,4,0,0	298	149	0.0125923	0.123169	1.0,0.956,0.789,0.6	1.0,0.8,1.0,1.0	-0.114
5647	ENSMUSG00000038895.16	Zfp653	chr9	-	22057500	22057702	22057500	22057678	22057803	22058415	5647	1,6,9,7	2,0,1,0	0,7,2,8	2,3,2,0	173	149	0.0114858	0.114687	0.301,1.0,0.886,1.0	0.0,0.668,0.463,1.0	0.264
5661	ENSMUSG00000032803.15	Cdv3	chr9	-	103353103	103356029	103353103	103355313	103356279	103356439	5661	152221000000	25,42,62,32	207190000000	14,18,5,12	298	149	5.15411e-09	1.08075e-06	0.752,0.725,0.566,0.73	0.881,0.841,0.936,0.879	-0.191
5668	ENSMUSG00000026333.14	Gin1	chr1	+	97782926	97783232	97783193	97783232	97777325	97777519	5668	34,15,12,19	1,5,7,5	14,27,36,29	2,0,0,0	298	149	1.83128e-07	2.19427e-05	0.944,0.6,0.462,0.655	0.778,1.0,1.0,1.0	-0.279
5687	ENSMUSG00000032120.11	C2cd2l	chr9	-	44313877	44314014	44313877	44314011	44314154	44314256	5687	9,16,22,26	60,56,47,31	14,23,13,4	78,80,55,50	152	149	0.0299152	0.237207	0.128,0.219,0.315,0.451	0.15,0.22,0.188,0.073	0.12
5804	ENSMUSG00000021336.17	Slc17a4	chr13	-	23904711	23905330	23904711	23904798	23905416	23905650	5804	23,37,42,48	7,3,4,0	27,41,25,35	4,0,0,0	298	149	0.00158572	0.0278538	0.622,0.86,0.84,1.0	0.771,1.0,1.0,1.0	-0.112
5849	ENSMUSG00000032582.14	Rbm6	chr9	-	107852124	107853674	107852124	107853403	107860348	107860459	5849	5,10,5,23	15,22,12,6	28,7,30,9	8,13,0,9	298	149	0.0376784	0.278656	0.143,0.185,0.172,0.657	0.636,0.212,1.0,0.333	-0.256
5904	ENSMUSG00000090266.10	Mettl23	chr11	+	116845762	116845945	116845818	116845945	116843674	116843774	5904	2,14,9,5	0,2,1,0	2,10,14,8	3,1,2,0	205	149	0.0432277	0.30089	1.0,0.836,0.867,1.0	0.326,0.879,0.836,1.0	0.165
5939	ENSMUSG00000044876.15	Zfp444	chr7	+	6183789	6184202	6183861	6184202	6181455	6181500	5939	9,1,0,10	0,0,3,2	6,3,9,10	0,0,0,0	221	149	0.0255105	0.210289	1.0,1.0,0.0,0.771	1.0,1.0,1.0,1.0	-0.307
5978	ENSMUSG00000032480.17	Dhx30	chr9	-	110112970	110113090	110112970	110113025	110115490	110115582	5978	3,12,11,3	0,2,3,3	7,7,5,6	1,0,0,0	214	149	0.000162727	0.00500872	1.0,0.807,0.719,0.41	0.83,1.0,1.0,1.0	-0.224

## Sheet: 232 A5SS events
ID	GeneID	geneSymbol	chr	strand	longExonStart_0base	longExonEnd	shortES	shortEE	flankingES	flankingEE	ID	IJC_SAMPLE_1	SJC_SAMPLE_1	IJC_SAMPLE_2	SJC_SAMPLE_2	IncFormLen	SkipFormLen	PValue	FDR	IncLevel1	IncLevel2	IncLevelDifference
1	ENSMUSG00000035299.16	Mid1	chrX	+	169926953	169927669	169926953	169927555	169966062	169966158	1	7,12,5,16	1,1,5,0	8,18,14,3	0,0,0,0	263	149	0.0026236	0.0204122	0.799,0.872,0.362,1.0	1.0,1.0,1.0,1.0	-0.242
17	ENSMUSG00000031429.14	Psmd10	chrX	-	140952146	140952313	140952225	140952313	140948428	140949309	17	56,63,73,74	13,16,25,3	60,50,58,53	2,5,1,1	228	149	1.22701e-06	3.34125e-05	0.738,0.72,0.656,0.942	0.951,0.867,0.974,0.972	-0.177
26	ENSMUSG00000056537.11	Rlim	chrX	-	103981062	103981284	103981072	103981284	103979272	103979334	26	15,10,21,7	65,41,61,21	18,9,24,11	45,29,12,27	159	149	0.0478946	0.217368	0.178,0.186,0.244,0.238	0.273,0.225,0.652,0.276	-0.145
30	ENSMUSG00000004221.16	Ikbkg	chrX	+	74427761	74427902	74427761	74427874	74432804	74433006	30	108,69,74,57	62,20,0,48	66,41,34,18	77,44,35,17	177	149	0.000120972	0.00162623	0.595,0.744,1.0,0.5	0.419,0.44,0.45,0.471	0.265
94	ENSMUSG00000024949.17	Sf1	chr19	+	6374009	6374287	6374009	6374283	6374548	6374608	94	66,43,72,47	142115153181	16,17,28,2	121,122,134,86	153	149	3.4685e-09	1.63713e-07	0.312,0.267,0.314,0.202	0.114,0.119,0.169,0.022	0.168
117	ENSMUSG00000038425.18	Poli	chr18	-	70524730	70525528	70525375	70525528	70523162	70523399	117	2,9,2,0	0,7,0,9	1,0,0,2	8,1,2,2	298	149	0.00464751	0.0327951	1.0,0.391,1.0,0.0	0.059,0.0,0.0,0.333	0.5
140	ENSMUSG00000034445.8	Cyb561a3	chr19	+	10577450	10577893	10577450	10577563	10578981	10579074	140	28,33,8,12	0,1,0,0	30,11,19,11	6,0,0,3	298	149	0.000298326	0.00333497	1.0,0.943,1.0,1.0	0.714,1.0,1.0,0.647	0.146
155	ENSMUSG00000024073.16	Birc6	chr17	+	74605988	74606135	74605988	74606123	74608096	74608284	155	8,16,19,6	25,6,5,0	23,15,4,2	23,13,19,11	161	149	0.018215	0.0997128	0.228,0.712,0.779,1.0	0.481,0.516,0.163,0.144	0.354
176	ENSMUSG00000024369.16	Nelfe	chr17	+	34850407	34850674	34850407	34850462	34850910	34850993	176	4,6,10,8	10,11,7,5	3,1,0,1	19,15,39,12	298	149	1.22004e-09	6.32041e-08	0.167,0.214,0.417,0.444	0.073,0.032,0.0,0.04	0.274
221	ENSMUSG00000024188.16	Luc7l	chr17	+	26252965	26254388	26252965	26253091	26255030	26255125	221	12,24,17,11	21,15,26,23	2,24,2,6	43,35,28,26	298	149	0.000235108	0.0026926	0.222,0.444,0.246,0.193	0.023,0.255,0.034,0.103	0.172
229	ENSMUSG00000002274.13	Metrn	chr17	-	25796085	25796641	25796240	25796641	25795373	25795433	229	17,6,2,0	17,13,4,9	1,1,2,3	28,12,25,11	298	149	0.000100907	0.00141005	0.333,0.188,0.2,0.0	0.018,0.04,0.038,0.12	0.126
232	ENSMUSG00000015120.15	Ube2i	chr17	-	25274161	25274310	25274172	25274310	25269402	25269479	232	33,24,39,30	23,8,15,13	13,59,45,36	0,1,1,2	160	149	4.44089e-16	5.89528e-14	0.572,0.736,0.708,0.682	1.0,0.982,0.977,0.944	-0.301
234	ENSMUSG00000041130.10	Zfp598	chr17	+	24678595	24678713	24678595	24678704	24679036	24679224	234	19,9,42,14	32,21,25,37	24,38,23,18	2,28,7,9	158	149	0.000201046	0.00241255	0.359,0.288,0.613,0.263	0.919,0.561,0.756,0.654	-0.342
235	ENSMUSG00000052752.15	Traf7	chr17	-	24512949	24513084	24512955	24513084	24512168	24512386	235	15,36,7,20	9,3,6,4	8,17,11,8	2,0,3,0	155	149	0.00505354	0.0353083	0.616,0.92,0.529,0.828	0.794,1.0,0.779,1.0	-0.17
239	ENSMUSG00000024118.14	Tedc2	chr17	-	24220516	24220615	24220521	24220615	24220251	24220310	239	66,46,45,123	43,6,17,18	169242346232	17,12,71,26	154	149	0.00125633	0.0110724	0.598,0.881,0.719,0.869	0.906,0.951,0.825,0.896	-0.128
269	ENSMUSG00000045975.8	C2cd2	chr16	-	97890005	97890118	97890013	97890118	97886087	97886210	269	23,10,13,28	53,46,46,51	8,6,12,2	129,77,102,80	157	149	5.05681e-11	3.32847e-09	0.292,0.171,0.211,0.343	0.056,0.069,0.1,0.023	0.192
276	ENSMUSG00000022983.16	Scaf4	chr16	-	90250053	90250437	90250056	90250437	90249638	90249712	276	3,5,2,0	27,21,23,30	4,6,5,4	8,14,9,14	152	149	0.00045955	0.00478473	0.098,0.189,0.079,0.0	0.329,0.296,0.353,0.219	-0.208
285	ENSMUSG00000022641.15	Bbx	chr16	-	50432110	50432389	50432241	50432389	50428909	50428981	285	9,5,8,4	7,13,5,8	4,2,3,1	13,8,9,6	280	149	0.00862144	0.0553231	0.406,0.17,0.46,0.21	0.141,0.117,0.151,0.081	0.189
287	ENSMUSG00000036208.13	Nepro	chr16	+	44729241	44729325	44729241	44729321	44729581	44729713	287	9,1,2,0	11,14,30,7	0,0,0,0	5,17,8,20	153	149	5.11258e-05	0.000816475	0.443,0.065,0.061,0.0	0.0,0.0,0.0,0.0	0.142
290	ENSMUSG00000022704.16	Qtrt2	chr16	-	43880828	43881213	43880992	43881213	43880298	43880354	290	15,10,4,8	4,7,3,4	2,2,1,3	21,2,9,0	298	149	0.0232485	0.122531	0.652,0.417,0.4,0.5	0.045,0.333,0.053,1.0	0.134
291	ENSMUSG00000022704.16	Qtrt2	chr16	-	43880967	43881213	43880992	43881213	43880298	43880354	291	19,12,13,8	4,7,3,4	4,1,2,8	21,2,9,0	174	149	0.0303013	0.152151	0.803,0.595,0.788,0.631	0.14,0.3,0.16,1.0	0.304
295	ENSMUSG00000022906.15	Parp9	chr16	+	35943368	35943510	35943368	35943402	35945768	35945952	295	10,6,8,9	1,2,1,4	17,10,11,7	0,0,0,3	257	149	0.00233162	0.0183421	0.853,0.635,0.823,0.566	1.0,1.0,1.0,0.575	-0.175
302	ENSMUSG00000022801.13	Lrch3	chr16	+	32994947	32995011	32994947	32994996	32995805	32995913	302	3,2,3,0	0,15,14,14	0,0,0,0	9,11,9,7	164	149	0.00412499	0.0296999	1.0,0.108,0.163,0.0	0.0,0.0,0.0,0.0	0.318
340	ENSMUSG00000068663.14	Clec16a	chr16	+	10595801	10596033	10595801	10595985	10611002	10611135	340	29,14,4,18	24,16,13,11	6,11,5,3	19,17,14,17	197	149	0.00821534	0.0533645	0.478,0.398,0.189,0.553	0.193,0.329,0.213,0.118	0.191
344	ENSMUSG00000022515.6	Anks3	chr16	-	4947648	4948363	4948225	4948363	4947264	4947432	344	28,11,25,12	2,0,10,0	18,16,13,7	0,0,0,0	298	149	2.074e-05	0.000379188	0.875,1.0,0.556,1.0	1.0,1.0,1.0,1.0	-0.142
358	ENSMUSG00000022992.17	Kansl2	chr15	-	98524458	98524712	98524560	98524712	98520317	98520425	358	214288171226	15,34,28,27	148132156148	5,1,7,1	251	149	5.17135e-11	3.32847e-09	0.894,0.834,0.784,0.832	0.946,0.987,0.93,0.989	-0.127
376	ENSMUSG00000015363.13	Trabd	chr15	+	89081352	89081453	89081352	89081431	89081950	89082117	376	37,42,19,29	150134162211	23,9,3,13	205294330204	171	149	6.10623e-14	6.17601e-12	0.177,0.215,0.093,0.107	0.089,0.026,0.008,0.053	0.104
393	ENSMUSG00000033287.16	Kctd17	chr15	+	78436900	78437099	78436900	78436994	78437583	78437671	393	11,12,6,15	0,0,7,0	14,11,11,8	0,0,0,0	254	149	0.0427423	0.19747	1.0,1.0,0.335,1.0	1.0,1.0,1.0,1.0	-0.166
394	ENSMUSG00000003778.14	Brd8	chr18	-	34608417	34609949	34609804	34609949	34607774	34608055	394	33,49,52,36	3,8,4,8	36,29,25,16	0,2,1,1	298	149	0.0001173	0.00158691	0.846,0.754,0.867,0.692	1.0,0.879,0.926,0.889	-0.134
425	ENSMUSG00000039458.15	Mtmr12	chr15	+	12236017	12236148	12236017	12236120	12237928	12238019	425	18,12,4,2	3,13,9,3	9,25,7,7	0,6,6,1	177	149	0.0229257	0.121736	0.835,0.437,0.272,0.359	1.0,0.778,0.495,0.855	-0.306
448	ENSMUSG00000031109.16	Enox2	chrX	-	49286844	49286904	49286855	49286904	49080616	49080751	448	2,1,2,7	4,2,0,9	8,2,3,2	0,0,1,0	160	149	2.61301e-07	8.16182e-06	0.318,0.318,1.0,0.42	1.0,1.0,0.736,1.0	-0.42
477	ENSMUSG00000004561.14	Mettl17	chr14	+	51891366	51891551	51891366	51891547	51891626	51891793	477	10,17,15,38	4,6,2,1	34,23,42,22	0,0,4,0	153	149	0.000212078	0.00248869	0.709,0.734,0.88,0.974	1.0,1.0,0.911,1.0	-0.154
495	ENSMUSG00000042323.17	Pbrm1	chr14	+	31023066	31023179	31023066	31023170	31025497	31025650	495	12,1,3,0	0,6,6,5	5,0,3,6	1,2,0,0	158	149	0.00136249	0.0119092	1.0,0.136,0.32,0.0	0.825,0.0,1.0,1.0	-0.342
512	ENSMUSG00000021779.17	Thrb	chr14	+	17826893	17826975	17826893	17826968	17925595	17925659	512	0,8,0,4	5,7,20,4	3,0,0,0	4,11,3,2	156	149	0.00521039	0.0360484	0.0,0.522,0.0,0.489	0.417,0.0,0.0,0.0	0.149
568	ENSMUSG00000037816.10	Fbxw17	chr13	+	50419839	50420028	50419839	50419877	50423201	50423362	568	3,8,3,4	0,5,3,9	0,0,0,0	1,3,3,3	298	149	6.4033e-08	2.30519e-06	1.0,0.444,0.333,0.182	0.0,0.0,0.0,0.0	0.49
601	ENSMUSG00000039233.12	Tbce	chr13	-	14003532	14003696	14003542	14003696	14001109	14001178	601	0,5,8,5	39,35,30,43	4,3,12,13	37,18,17,14	159	149	0.00665111	0.0445645	0.0,0.118,0.2,0.098	0.092,0.135,0.398,0.465	-0.169
619	ENSMUSG00000021288.19	Klc1	chr12	+	111789324	111789486	111789324	111789459	111793648	111793699	619	5,11,6,9	0,4,4,0	11,13,6,2	0,1,0,0	176	149	0.000776052	0.00742493	1.0,0.7,0.559,1.0	1.0,0.917,1.0,1.0	-0.164
631	ENSMUSG00000021268.17	Meg3	chr12	+	109543699	109543849	109543699	109543805	109544026	109544742	631	1,37,5,16	2,12,0,16	6,2,1,0	3,4,4,5	193	149	0.0154471	0.0870282	0.279,0.704,1.0,0.436	0.607,0.279,0.162,0.0	0.343
650	ENSMUSG00000034157.12	Cipc	chr12	+	86952743	86953004	86952743	86952931	86959727	86959828	650	4,2,3,4	10,1,14,15	1,0,1,2	17,8,21,12	222	149	0.00053109	0.0054377	0.212,0.573,0.126,0.152	0.038,0.0,0.031,0.101	0.223
665	ENSMUSG00000060073.9	Psma3	chr12	+	70978732	70978839	70978732	70978815	70983323	70983442	665	5,6,10,4	34,27,28,36	0,1,3,2	35,21,29,35	173	149	0.000104865	0.00144987	0.112,0.161,0.235,0.087	0.0,0.039,0.082,0.047	0.107
691	ENSMUSG00000021843.17	Ktn1	chr14	+	47734154	47734270	47734154	47734264	47736099	47736291	691	0,0,1,5	11,1,7,21	10,7,2,0	5,12,0,9	155	149	0.0132869	0.0781756	0.0,0.0,0.121,0.186	0.658,0.359,1.0,0.0	-0.427
705	ENSMUSG00000060147.15	Serpinb6a	chr13	-	33935568	33935794	33935626	33935794	33931471	33931646	705	18,57,21,35	3,0,3,1	10,19,5,9	2,2,3,3	207	149	0.0101803	0.0621392	0.812,1.0,0.834,0.962	0.783,0.872,0.545,0.683	0.181
707	ENSMUSG00000060147.15	Serpinb6a	chr13	-	33935572	33935794	33935626	33935794	33931471	33931646	707	18,58,16,37	3,0,3,1	8,22,6,6	2,2,3,3	203	149	0.0098146	0.0605995	0.815,1.0,0.797,0.964	0.746,0.89,0.595,0.595	0.188
708	ENSMUSG00000060147.15	Serpinb6a	chr13	-	33935618	33935794	33935626	33935794	33931471	33931646	708	11,3,5,2	3,0,3,1	2,1,1,2	2,2,3,3	157	149	0.00353615	0.0260791	0.777,1.0,0.613,0.655	0.487,0.322,0.24,0.388	0.402
719	ENSMUSG00000056962.11	Jmjd6	chr11	-	116839837	116840545	116840447	116840545	116838989	116839128	719	25,33,26,42	0,0,3,0	19,20,38,36	5,4,4,0	298	149	8.24455e-05	0.00121607	1.0,1.0,0.813,1.0	0.655,0.714,0.826,1.0	0.154
720	ENSMUSG00000056962.11	Jmjd6	chr11	-	116840409	116840545	116840447	116840545	116838989	116839128	720	67,31,68,47	0,0,3,0	26,59,22,24	5,4,4,0	187	149	5.93743e-05	0.000927287	1.0,1.0,0.948,1.0	0.806,0.922,0.814,1.0	0.101
733	ENSMUSG00000041654.15	Slc39a11	chr11	-	113463950	113464095	113463971	113464095	113369727	113369898	733	33,16,14,11	85,40,39,59	5,0,6,3	31,44,33,17	170	149	9.30141e-05	0.00133488	0.254,0.26,0.239,0.14	0.124,0.0,0.137,0.134	0.124
766	ENSMUSG00000000276.11	Dgke	chr11	-	89048848	89049002	89048888	89049002	89044239	89044311	766	0,2,4,4	4,7,0,9	0,0,0,0	5,4,7,9	189	149	0.000164002	0.00206772	0.0,0.184,1.0,0.259	0.0,0.0,0.0,0.0	0.361
774	ENSMUSG00000020697.16	Lig3	chr11	+	82781192	82781276	82781192	82781272	82783345	82783899	774	9,7,8,0	8,0,0,8	3,11,2,6	0,0,3,0	153	149	0.0115049	0.0692195	0.523,1.0,1.0,0.0	1.0,1.0,0.394,1.0	-0.218
777	ENSMUSG00000057181.15	5730455P16Rik	chr11	-	80377753	80378034	80377841	80378034	80376802	80376883	777	4,6,1,4	19,14,23,12	0,2,0,2	26,31,65,29	237	149	1.11892e-05	0.000222111	0.117,0.212,0.027,0.173	0.0,0.039,0.0,0.042	0.112
801	ENSMUSG00000057054.11	Inca1	chr11	-	70699919	70700155	70699987	70700155	70690438	70690552	801	8,2,6,1	15,14,37,6	7,15,23,9	0,0,3,3	217	149	3.33067e-16	4.71623e-14	0.268,0.089,0.1,0.103	1.0,1.0,0.84,0.673	-0.738
803	ENSMUSG00000057054.11	Inca1	chr11	-	70699987	70700155	70700057	70700155	70690438	70690552	803	15,14,37,6	0,11,13,0	0,4,9,3	3,8,28,5	219	149	2.27083e-06	5.48095e-05	1.0,0.464,0.659,1.0	0.0,0.254,0.179,0.29	0.6
805	ENSMUSG00000057054.11	Inca1	chr11	-	70699919	70700155	70699987	70700155	70695863	70695948	805	8,2,9,1	68,23,59,33	16,17,25,21	42,32,53,57	217	149	2.34519e-08	9.2244e-07	0.075,0.056,0.095,0.02	0.207,0.267,0.245,0.202	-0.169
806	ENSMUSG00000057054.11	Inca1	chr11	-	70699919	70700155	70700057	70700155	70695863	70695948	806	8,2,9,1	14,18,17,11	16,21,31,21	25,22,37,32	287	149	0.00209516	0.0169206	0.229,0.055,0.216,0.045	0.249,0.331,0.303,0.254	-0.148
807	ENSMUSG00000057054.11	Inca1	chr11	-	70699948	70700155	70699987	70700155	70695863	70695948	807	4,1,2,1	68,23,59,33	9,7,19,4	42,32,53,57	188	149	1.65465e-06	4.23432e-05	0.045,0.033,0.026,0.023	0.145,0.148,0.221,0.053	-0.11
808	ENSMUSG00000057054.11	Inca1	chr11	-	70699948	70700155	70700057	70700155	70695863	70695948	808	4,1,2,1	14,18,17,11	9,11,25,4	25,22,37,32	258	149	0.000467817	0.00484704	0.142,0.031,0.064,0.05	0.172,0.224,0.281,0.067	-0.114
809	ENSMUSG00000057054.11	Inca1	chr11	-	70699987	70700155	70700057	70700155	70695863	70695948	809	68,23,59,33	14,18,17,11	42,36,59,57	25,22,37,32	219	149	0.0333272	0.162356	0.768,0.465,0.702,0.671	0.533,0.527,0.52,0.548	0.119
814	ENSMUSG00000047284.14	Neurl4	chr11	+	69903007	69903719	69903007	69903452	69903864	69904163	814	13,1,7,13	4,4,3,0	11,21,31,20	2,0,1,0	298	149	3.27672e-05	0.00055678	0.619,0.111,0.538,1.0	0.733,1.0,0.939,1.0	-0.351
819	ENSMUSG00000018474.18	Chd3	chr11	-	69346571	69346813	69346617	69346813	69345470	69345634	819	42,32,38,71	26,31,50,73	38,50,67,30	86,58,79,58	195	149	0.0230503	0.121788	0.552,0.441,0.367,0.426	0.252,0.397,0.393,0.283	0.115
851	ENSMUSG00000042050.8	Wdr60	chr12	-	116225964	116226137	116225975	116226137	116224886	116225049	851	5,8,2,1	0,3,2,9	1,1,9,6	0,0,0,0	160	149	3.82368e-07	1.16021e-05	1.0,0.713,0.482,0.094	1.0,1.0,1.0,1.0	-0.428
854	ENSMUSG00000007850.16	Hnrnph1	chr11	+	50383830	50383920	50383830	50383890	50384643	50384736	854	133119136123	48,62,29,34	121179104104	14,10,13,8	179	149	4.38698e-11	3.00579e-09	0.698,0.615,0.796,0.751	0.878,0.937,0.869,0.915	-0.185
872	ENSMUSG00000078974.10	Sec61g	chr11	-	16508078	16508484	16508103	16508484	16506372	16506472	872	17,10,7,0	14,56,21,20	5,5,0,0	25,22,20,17	174	149	0.027806	0.141867	0.51,0.133,0.222,0.0	0.146,0.163,0.0,0.0	0.139
886	ENSMUSG00000020659.16	Cbll1	chr12	-	31494581	31494749	31494590	31494749	31492078	31492179	886	23,22,28,21	6,3,2,2	16,20,3,16	17,5,0,11	158	149	0.00695094	0.0462093	0.783,0.874,0.93,0.908	0.47,0.79,1.0,0.578	0.164
898	ENSMUSG00000022994.9	Adcy6	chr15	-	98600171	98600289	98600177	98600289	98599899	98600027	898	7,5,4,3	33,61,32,46	0,0,0,0	30,30,41,37	155	149	4.81894e-07	1.38317e-05	0.169,0.073,0.107,0.059	0.0,0.0,0.0,0.0	0.102
901	ENSMUSG00000022974.12	Paxbp1	chr16	-	91030415	91030556	91030432	91030556	91027229	91027329	901	22,33,40,47	7,7,7,11	22,23,32,25	6,8,16,22	166	149	0.00934557	0.0583823	0.738,0.809,0.837,0.793	0.767,0.721,0.642,0.505	0.136
909	ENSMUSG00000005682.9	Pan2	chr10	+	128304094	128304493	128304094	128304389	128308064	128308234	909	16,32,37,32	10,4,9,4	18,26,41,39	0,3,0,8	253	149	0.0102102	0.0621392	0.485,0.825,0.708,0.825	1.0,0.836,1.0,0.742	-0.184
918	ENSMUSG00000020530.14	Ggnbp2	chr11	-	84841414	84841624	84841420	84841624	84840260	84840435	918	108143140153	40,50,63,52	71,64,114,66	57,74,84,84	155	149	1.15607e-09	6.13872e-08	0.722,0.733,0.681,0.739	0.545,0.454,0.566,0.43	0.22
935	ENSMUSG00000109783.1	Gm45338	chr16	+	23521686	23522218	23521686	23521953	23527494	23527606	935	1,3,8,2	0,0,4,0	3,8,4,2	0,2,16,0	298	149	0.0424861	0.197031	1.0,1.0,0.5,1.0	1.0,0.667,0.111,1.0	0.18
960	ENSMUSG00000031381.16	Piga	chrX	+	164422583	164423672	164422583	164423363	164427931	164428064	960	0,2,2,3	5,9,2,2	2,0,0,0	2,1,3,17	298	149	0.0134285	0.0783573	0.0,0.1,0.333,0.429	0.333,0.0,0.0,0.0	0.132
967	ENSMUSG00000004815.12	Dgkq	chr5	-	108650489	108650968	108650816	108650968	108649824	108650379	967	22,8,20,18	0,0,10,0	13,35,33,16	0,0,0,0	298	149	0.00302372	0.022937	1.0,1.0,0.5,1.0	1.0,1.0,1.0,1.0	-0.125
975	ENSMUSG00000079363.7	Gbp4	chr5	-	105136809	105137045	105136838	105137045	105135066	105135190	975	2,14,1,1	2,10,20,9	0,2,2,0	12,4,8,2	178	149	0.00821573	0.0533645	0.456,0.54,0.04,0.085	0.0,0.295,0.173,0.0	0.163
985	ENSMUSG00000062012.14	Zfp13	chr17	-	23581056	23581270	23581077	23581270	23580770	23580862	985	11,16,17,6	1,6,6,5	9,7,24,15	3,0,2,3	170	149	0.0318972	0.158293	0.906,0.7,0.713,0.513	0.724,1.0,0.913,0.814	-0.155
986	ENSMUSG00000030213.12	Atf7ip	chr6	+	136563759	136563846	136563759	136563837	136565016	136565162	986	6,9,5,8	24,37,20,10	0,2,2,2	19,11,26,21	158	149	0.000145623	0.00187457	0.191,0.187,0.191,0.43	0.0,0.146,0.068,0.082	0.176
987	ENSMUSG00000035172.15	Plekhh3	chr11	-	101164012	101164471	101164037	101164471	101163505	101163697	987	14,6,27,7	0,0,1,2	11,21,19,6	0,0,6,4	174	149	0.00154523	0.0131283	1.0,1.0,0.959,0.75	1.0,1.0,0.731,0.562	0.104
997	ENSMUSG00000070044.15	Fam149a	chr8	-	45342381	45342514	45342390	45342514	45341155	45341284	997	5,7,6,3	30,51,28,80	0,0,0,0	40,38,66,27	158	149	1.04229e-07	3.57068e-06	0.136,0.115,0.168,0.034	0.0,0.0,0.0,0.0	0.113
998	ENSMUSG00000067367.9	Lyar	chr5	+	38223133	38223231	38223133	38223227	38224626	38224797	998	2,6,3,5	4,10,9,1	0,6,2,4	1,3,1,0	153	149	0.0284806	0.143688	0.327,0.369,0.245,0.83	0.0,0.661,0.661,1.0	-0.138
1013	ENSMUSG00000039842.15	Mcph1	chr8	+	18627117	18627318	18627117	18627240	18629545	18629635	1013	3,0,4,0	0,17,1,8	0,1,2,0	2,1,5,2	227	149	0.0444762	0.204033	1.0,0.0,0.724,0.0	0.0,0.396,0.208,0.0	0.28
1015	ENSMUSG00000029173.12	Sepsecs	chr5	-	52668898	52669053	52668965	52669053	52665987	52666106	1015	39,22,32,37	5,3,7,0	49,67,50,38	5,0,1,0	216	149	0.00118533	0.0104902	0.843,0.835,0.759,1.0	0.871,1.0,0.972,1.0	-0.102
1016	ENSMUSG00000030990.18	Pgap2	chr7	+	102235661	102235872	102235661	102235759	102236093	102236346	1016	4,0,2,2	6,13,6,2	3,3,5,1	5,0,3,1	262	149	0.0240775	0.125227	0.275,0.0,0.159,0.363	0.254,1.0,0.487,0.363	-0.327
1057	ENSMUSG00000038056.15	Kmt2c	chr5	-	25281660	25281803	25281672	25281803	25281231	25281400	1057	14,4,10,14	21,19,11,36	21,7,33,15	12,13,21,10	161	149	0.00512696	0.0357038	0.382,0.163,0.457,0.265	0.618,0.333,0.593,0.581	-0.215
1068	ENSMUSG00000040687.16	Madd	chr2	-	91158404	91158488	91158407	91158488	91157984	91158143	1068	12,4,9,12	0,0,9,10	18,8,12,4	0,2,1,0	152	149	0.000235793	0.0026926	1.0,1.0,0.495,0.541	1.0,0.797,0.922,1.0	-0.171
1069	ENSMUSG00000040687.16	Madd	chr2	-	91158404	91158488	91158416	91158488	91157984	91158143	1069	12,4,14,12	0,0,0,1	18,8,12,4	4,2,7,0	161	149	2.38221e-06	5.66346e-05	1.0,1.0,1.0,0.917	0.806,0.787,0.613,1.0	0.178
1117	ENSMUSG00000028796.17	Phc2	chr4	+	128743353	128743556	128743353	128743461	128745001	128745131	1117	72,71,54,42	31,17,25,13	21,41,32,51	6,8,8,3	244	149	0.00927024	0.0580826	0.586,0.718,0.569,0.664	0.681,0.758,0.71,0.912	-0.131
1128	ENSMUSG00000011257.19	Pabpc4	chr4	+	123295201	123295321	123295201	123295273	123295929	123296057	1128	21,38,57,40	11,0,11,0	42,47,86,30	5,0,0,0	197	149	0.000225849	0.00263573	0.591,1.0,0.797,1.0	0.864,1.0,1.0,1.0	-0.119
1155	ENSMUSG00000047909.11	Ankrd16	chr2	+	11779676	11779897	11779676	11779823	11781476	11783756	1155	15,16,23,22	1,6,1,7	15,19,26,25	14,24,22,8	223	149	0.000261665	0.00297207	0.909,0.641,0.939,0.677	0.417,0.346,0.441,0.676	0.322
1195	ENSMUSG00000048832.9	Vps37c	chr19	+	10688750	10688983	10688750	10688979	10706209	10706308	1195	8,0,2,5	15,21,19,2	0,0,2,1	1,34,6,4	153	149	0.000815625	0.0076995	0.342,0.0,0.093,0.709	0.0,0.0,0.245,0.196	0.176
1299	ENSMUSG00000032580.12	Rbm5	chr9	-	107770551	107770959	107770884	107770959	107769560	107769626	1299	8,19,5,8	10,31,19,65	2,5,1,1	14,20,58,49	298	149	1.95932e-06	4.83906e-05	0.286,0.235,0.116,0.058	0.067,0.111,0.009,0.01	0.124
1368	ENSMUSG00000073471.3	Rsph3a	chr17	+	7952548	7952636	7952548	7952633	7970146	7970288	1368	38,17,43,57	7,3,1,6	47,56,68,16	0,0,0,0	152	149	4.04812e-07	1.21101e-05	0.842,0.847,0.977,0.903	1.0,1.0,1.0,1.0	-0.108
1398	ENSMUSG00000028073.15	Pear1	chr3	-	87763224	87763358	87763259	87763358	87762211	87762281	1398	6,3,7,4	1,3,0,5	4,0,1,0	0,6,1,6	184	149	0.00371334	0.027197	0.829,0.447,1.0,0.393	1.0,0.0,0.447,0.0	0.305
1418	ENSMUSG00000029020.13	Mfn2	chr4	-	147904449	147904698	147904657	147904698	147903354	147903497	1418	7,14,0,1	15,4,11,15	1,1,4,2	9,28,47,28	298	149	0.00567325	0.0387459	0.189,0.636,0.0,0.032	0.053,0.018,0.041,0.034	0.178
1423	ENSMUSG00000026812.16	Tsc1	chr2	+	28671765	28671923	28671765	28671881	28672392	28672504	1423	8,6,3,6	5,24,21,26	3,0,0,6	9,15,29,27	191	149	0.0127656	0.0759499	0.555,0.163,0.1,0.153	0.206,0.0,0.0,0.148	0.154
1445	ENSMUSG00000036180.15	Gatad2a	chr8	-	69916559	69916700	69916568	69916700	69916283	69916448	1445	8,9,1,8	94,32,59,26	7,4,11,15	25,40,6,9	158	149	0.00334022	0.0248064	0.074,0.21,0.016,0.225	0.209,0.086,0.634,0.611	-0.254
1459	ENSMUSG00000042520.16	Ubap2l	chr3	-	90038814	90039016	90038847	90039016	90038369	90038465	1459	11,1,6,3	58,25,43,20	3,28,6,7	43,54,15,18	182	149	0.0112029	0.067792	0.134,0.032,0.103,0.109	0.054,0.298,0.247,0.241	-0.115
1473	ENSMUSG00000027660.16	Skil	chr3	+	31113407	31113640	31113407	31113502	31116815	31117039	1473	38,34,35,20	41,38,25,30	9,9,18,27	46,22,36,49	287	149	0.000148262	0.00188567	0.325,0.317,0.421,0.257	0.092,0.175,0.206,0.222	0.156
1483	ENSMUSG00000027284.16	Cdan1	chr2	-	120722609	120722758	120722656	120722758	120720881	120720989	1483	22,14,13,11	1,0,2,0	5,9,2,8	5,0,1,7	196	149	1.60399e-05	0.000301493	0.944,1.0,0.832,1.0	0.432,1.0,0.603,0.465	0.319
1527	ENSMUSG00000005417.17	Mprip	chr11	+	59737071	59737582	59737071	59737228	59741119	59741261	1527	199197194243	41,56,17,52	188245307206	26,26,26,16	298	149	0.000516126	0.00532161	0.708,0.638,0.851,0.7	0.783,0.825,0.855,0.866	-0.108
1545	ENSMUSG00000000823.16	Zfp512b	chr2	-	181588624	181588801	181588654	181588801	181588395	181588520	1545	6,14,8,8	15,31,15,31	8,5,0,4	26,30,23,14	179	149	0.0151601	0.0858666	0.25,0.273,0.307,0.177	0.204,0.122,0.0,0.192	0.122
1546	ENSMUSG00000000823.16	Zfp512b	chr2	-	181592413	181592803	181592420	181592803	181590859	181590985	1546	5,24,9,10	3,1,6,0	8,25,16,14	0,1,0,2	156	149	0.000685506	0.00667897	0.614,0.958,0.589,1.0	1.0,0.96,1.0,0.87	-0.167
1564	ENSMUSG00000052384.14	Nrros	chr16	-	32162237	32163397	32163252	32163397	32147552	32147673	1564	9,3,8,1	0,1,0,0	1,7,7,0	3,0,0,2	298	149	0.00294148	0.0224792	1.0,0.6,1.0,1.0	0.143,1.0,1.0,0.0	0.364
1591	ENSMUSG00000027951.16	Adar	chr3	+	89745375	89745601	89745375	89745523	89745819	89745991	1591	16,18,24,10	13,9,16,12	12,6,13,5	16,15,25,17	227	149	0.000752732	0.0072344	0.447,0.568,0.496,0.354	0.33,0.208,0.254,0.162	0.228
1601	ENSMUSG00000059689.15	Zfp637	chr6	+	117843252	117843606	117843252	117843392	117844982	117845956	1601	5,11,6,4	0,1,1,9	3,0,4,6	9,1,6,0	298	149	0.0496973	0.222694	1.0,0.846,0.75,0.182	0.143,0.0,0.25,1.0	0.346
1606	ENSMUSG00000055296.14	Tmem245	chr4	-	56903353	56904049	56903917	56904049	56903211	56903247	1606	23,1,27,6	2,2,0,6	6,4,8,9	21,15,17,10	298	149	0.000335281	0.00370905	0.852,0.2,1.0,0.333	0.125,0.118,0.19,0.31	0.411
1612	ENSMUSG00000028149.12	Rap1gds1	chr3	-	139021765	139021935	139021812	139021935	139015545	139015671	1612	16,9,2,3	38,60,26,82	0,0,0,0	58,32,41,66	196	149	1.80575e-09	9.13195e-08	0.242,0.102,0.055,0.027	0.0,0.0,0.0,0.0	0.106
1648	ENSMUSG00000026409.14	Pfkfb2	chr1	-	130714455	130714575	130714465	130714575	130708075	130708201	1648	2,12,7,4	9,12,40,20	5,1,3,0	28,38,33,31	159	149	0.000290552	0.00326525	0.172,0.484,0.141,0.158	0.143,0.024,0.079,0.0	0.177
1652	ENSMUSG00000002221.11	Paxip1	chr5	-	27783680	27783773	27783729	27783773	27781421	27781485	1652	6,1,1,1	6,11,22,37	0,1,0,0	20,13,12,25	198	149	0.0064827	0.0435736	0.429,0.064,0.033,0.02	0.0,0.055,0.0,0.0	0.123
1704	ENSMUSG00000027944.13	Hax1	chr3	-	89997737	89998003	89997801	89998003	89996246	89996298	1704	55,60,35,53	17,17,21,6	77,76,75,54	4,1,8,4	213	149	3.33188e-07	1.02564e-05	0.694,0.712,0.538,0.861	0.931,0.982,0.868,0.904	-0.22
1710	ENSMUSG00000046808.17	Atp10d	chr5	+	72265970	72266168	72265970	72266074	72267406	72267533	1710	1,0,1,0	9,10,21,12	8,0,1,0	0,17,7,7	243	149	0.0314367	0.156878	0.064,0.0,0.028,0.0	1.0,0.0,0.081,0.0	-0.247
1782	ENSMUSG00000087174.7	5530601H04Rik	chrX	-	105068463	105068628	105068570	105068628	105066758	105066877	1782	38,22,19,17	4,13,9,4	22,13,31,30	3,3,4,0	256	149	0.0061176	0.0415137	0.847,0.496,0.551,0.712	0.81,0.716,0.819,1.0	-0.185
1789	ENSMUSG00000040123.17	Zmym5	chr14	-	56797667	56797830	56797684	56797830	56796603	56796810	1789	26,45,41,48	4,5,9,9	65,42,33,21	0,0,0,4	166	149	5.42432e-07	1.53617e-05	0.854,0.89,0.803,0.827	1.0,1.0,1.0,0.825	-0.113
1823	ENSMUSG00000040124.5	Gorab	chr1	-	163396807	163397169	163396811	163397169	163394590	163394692	1823	4,4,5,4	12,17,6,13	2,0,3,1	7,3,14,9	153	149	0.0370125	0.176266	0.245,0.186,0.448,0.231	0.218,0.0,0.173,0.098	0.155
1838	ENSMUSG00000041459.15	Tardbp	chr4	-	148618664	148618791	148618673	148618791	148617565	148617825	1838	7,9,13,14	18,2,7,5	12,3,1,2	1,0,0,0	158	149	6.0036e-08	2.19856e-06	0.268,0.809,0.637,0.725	0.919,1.0,1.0,1.0	-0.37
1841	ENSMUSG00000057335.11	Cep170	chr1	-	176742470	176742648	176742500	176742648	176739918	176740089	1841	2,3,2,1	26,34,15,34	4,4,1,2	5,2,10,8	179	149	0.00398424	0.0288823	0.06,0.068,0.1,0.024	0.4,0.625,0.077,0.172	-0.255
1842	ENSMUSG00000057335.11	Cep170	chr1	-	176742470	176742648	176742551	176742648	176739918	176740089	1842	8,9,10,5	2,15,9,6	13,5,6,4	0,0,1,4	230	149	0.000815119	0.0076995	0.722,0.28,0.419,0.351	1.0,1.0,0.795,0.393	-0.354
1843	ENSMUSG00000057335.11	Cep170	chr1	-	176742500	176742648	176742551	176742648	176739918	176740089	1843	32,40,23,38	2,15,9,6	14,3,15,10	0,0,1,4	200	149	0.0133763	0.078268	0.923,0.665,0.656,0.825	1.0,1.0,0.918,0.651	-0.125
1847	ENSMUSG00000036825.12	Ssx2ip	chr3	+	146404641	146404935	146404641	146404784	146417606	146417790	1847	30,24,28,5	0,0,5,10	6,12,22,5	0,7,12,7	298	149	0.0475687	0.216351	1.0,1.0,0.737,0.2	1.0,0.462,0.478,0.263	0.184
1855	ENSMUSG00000026113.17	Inpp4a	chr1	+	37379921	37380177	37379921	37380060	37387697	37387870	1855	5,11,16,27	0,1,2,5	14,11,15,7	0,8,6,16	266	149	0.0166587	0.0921433	1.0,0.86,0.818,0.752	1.0,0.435,0.583,0.197	0.304
1874	ENSMUSG00000028542.17	Slc6a9	chr4	+	117855874	117855986	117855874	117855948	117856689	117856821	1874	3,1,10,6	3,0,3,1	9,14,10,4	0,0,1,0	187	149	0.000851096	0.00796356	0.443,1.0,0.726,0.827	1.0,1.0,0.888,1.0	-0.223
1890	ENSMUSG00000026005.15	Rpe	chr1	+	66700830	66701417	66700830	66701017	66706445	66706525	1890	0,2,3,2	2,5,6,2	1,4,0,2	0,0,1,0	298	149	2.22423e-06	5.43018e-05	0.0,0.167,0.2,0.333	1.0,1.0,0.0,1.0	-0.575
1895	ENSMUSG00000028906.17	Epb41	chr4	-	131955527	131955578	131955542	131955578	131937014	131937464	1895	0,1,1,1	2,2,0,3	5,0,9,3	1,8,2,1	164	149	0.00189587	0.015482	0.0,0.312,1.0,0.232	0.82,0.0,0.803,0.732	-0.203
1907	ENSMUSG00000075595.9	Zfp652	chr11	+	95748999	95750147	95748999	95749607	95752874	95753022	1907	36,28,31,44	9,1,0,9	43,42,42,29	1,4,0,0	298	149	0.000855184	0.00796672	0.667,0.933,1.0,0.71	0.956,0.84,1.0,1.0	-0.121
1920	ENSMUSG00000036281.13	Snapc4	chr2	-	26372730	26372825	26372758	26372825	26370832	26370880	1920	24,4,3,17	6,4,0,0	3,9,17,6	1,0,0,0	177	149	0.000850083	0.00796356	0.771,0.457,1.0,1.0	0.716,1.0,1.0,1.0	-0.122
1953	ENSMUSG00000024163.17	Mapk8ip3	chr17	-	24917994	24918136	24918087	24918136	24914458	24914705	1953	4,6,0,7	0,2,4,3	4,4,0,1	1,0,2,0	242	149	0.0301616	0.151809	1.0,0.649,0.0,0.59	0.711,1.0,0.0,1.0	-0.118
1961	ENSMUSG00000021819.11	Zswim8	chr14	+	20715951	20716083	20715951	20716062	20716221	20716401	1961	38,33,66,45	1,0,5,0	48,41,34,33	11,14,0,4	170	149	1.16453e-05	0.000229025	0.971,1.0,0.92,1.0	0.793,0.72,1.0,0.879	0.125
1962	ENSMUSG00000021819.11	Zswim8	chr14	+	20721170	20722053	20721170	20722029	20722142	20722319	1962	16,24,11,2	53,59,75,41	1,2,5,2	25,42,44,44	173	149	6.01608e-05	0.000932712	0.206,0.259,0.112,0.04	0.033,0.039,0.089,0.038	0.104
1967	ENSMUSG00000039318.12	Rab3gap2	chr1	+	185266900	185267074	185266900	185267014	185267172	185267279	1967	30,31,21,23	6,0,1,2	20,41,32,26	9,3,0,13	209	149	0.0450518	0.205785	0.781,1.0,0.937,0.891	0.613,0.907,1.0,0.588	0.125
2002	ENSMUSG00000000561.14	Wdr77	chr3	+	105965764	105965873	105965764	105965856	105966356	105966425	2002	41,76,58,87	23,21,17,42	74,77,82,73	0,9,2,0	166	149	0	0	0.615,0.765,0.754,0.65	1.0,0.885,0.974,1.0	-0.269
2034	ENSMUSG00000032280.16	Tle3	chr9	+	61409274	61409416	61409274	61409407	61409935	61410120	2034	17,20,25,18	28,27,25,11	4,6,0,0	20,16,30,13	158	149	5.60416e-08	2.08829e-06	0.364,0.411,0.485,0.607	0.159,0.261,0.0,0.0	0.362
2035	ENSMUSG00000032280.16	Tle3	chr9	+	61409935	61410135	61409935	61410120	61411262	61411339	2035	16,63,36,10	12,14,16,15	30,16,40,11	8,0,8,0	164	149	0.000883506	0.0081285	0.548,0.803,0.672,0.377	0.773,1.0,0.82,1.0	-0.298
2046	ENSMUSG00000058594.15	Fbh1	chr2	-	11769749	11769931	11769775	11769931	11767121	11767711	2046	14,22,4,20	26,36,6,50	5,10,10,10	25,30,28,37	175	149	0.0242187	0.125465	0.314,0.342,0.362,0.254	0.146,0.221,0.233,0.187	0.121
2065	ENSMUSG00000026048.16	Ercc5	chr1	+	44158143	44158335	44158143	44158259	44158804	44158891	2065	16,11,3,17	23,20,39,21	4,0,0,0	13,13,15,17	225	149	4.75154e-07	1.3825e-05	0.315,0.267,0.048,0.349	0.169,0.0,0.0,0.0	0.203
2088	ENSMUSG00000028677.19	Rnf220	chr4	-	117285850	117285972	117285928	117285972	117285378	117285511	2088	91,66,96,74	8,12,11,12	37,64,58,54	11,13,24,8	227	149	0.00843253	0.0542748	0.882,0.783,0.851,0.802	0.688,0.764,0.613,0.816	0.109
2109	ENSMUSG00000008305.18	Tle1	chr4	-	72169091	72169196	72169121	72169196	72145309	72145420	2109	19,32,24,18	0,3,5,3	5,6,4,5	3,16,7,1	179	149	2.88936e-05	0.00050719	1.0,0.899,0.8,0.833	0.581,0.238,0.322,0.806	0.396
2110	ENSMUSG00000008305.18	Tle1	chr4	-	72169091	72169196	72169121	72169196	72158212	72158417	2110	67,76,91,43	43,65,109,88	19,16,5,14	74,119,74,82	179	149	1.78746e-14	1.99819e-12	0.565,0.493,0.41,0.289	0.176,0.101,0.053,0.124	0.326
2144	ENSMUSG00000037703.14	Lzts3	chr2	-	130636942	130637419	130637284	130637419	130635772	130636627	2144	37,79,61,47	5,2,12,6	68,82,93,55	2,2,6,1	298	149	0.00165679	0.0139117	0.787,0.952,0.718,0.797	0.944,0.953,0.886,0.965	-0.123
2158	ENSMUSG00000001632.16	Brpf1	chr6	+	113317547	113317694	113317547	113317676	113318411	113318721	2158	9,10,21,15	4,13,3,11	10,5,15,10	23,11,31,22	167	149	0.000230583	0.00267627	0.667,0.407,0.862,0.549	0.279,0.289,0.302,0.289	0.331
2191	ENSMUSG00000026634.16	Angel2	chr1	+	190940873	190941458	190940873	190941295	190942120	190942247	2191	6,12,12,6	8,17,35,21	8,5,4,0	33,10,31,31	298	149	0.00223684	0.0177942	0.273,0.261,0.146,0.125	0.108,0.2,0.061,0.0	0.109
2192	ENSMUSG00000026095.15	Asnsd1	chr1	-	53347014	53348558	53348445	53348558	53346579	53346761	2192	145153116145	27,25,12,13	149153146136	7,2,12,13	298	149	0.00016954	0.00210586	0.729,0.754,0.829,0.848	0.914,0.975,0.859,0.84	-0.107
2197	ENSMUSG00000018196.18	Glrx2	chr1	+	143741647	143741754	143741647	143741711	143745046	143745223	2197	14,11,20,2	59,55,63,62	1,4,1,0	60,67,81,58	192	149	1.53701e-10	8.82326e-09	0.156,0.134,0.198,0.024	0.013,0.044,0.009,0.0	0.112
2203	ENSMUSG00000041215.16	Yeats2	chr16	+	20156886	20157132	20156886	20157123	20159136	20159252	2203	6,1,0,3	3,1,3,0	3,9,4,4	1,0,0,0	158	149	0.000552351	0.00558663	0.654,0.485,0.0,1.0	0.739,1.0,1.0,1.0	-0.4
2204	ENSMUSG00000036792.12	Mbd5	chr2	+	49272040	49273057	49272040	49272367	49274562	49274774	2204	10,0,1,7	0,4,0,25	3,4,8,8	0,1,0,0	298	149	3.12566e-05	0.000539748	1.0,0.0,1.0,0.123	1.0,0.667,1.0,1.0	-0.386
2289	ENSMUSG00000107283.3	Mpv17	chr5	-	31145239	31145278	31145245	31145278	31144699	31144752	2289	10,5,9,6	63,41,65,51	0,2,0,0	42,71,47,45	155	149	3.6182e-09	1.67067e-07	0.132,0.105,0.117,0.102	0.0,0.026,0.0,0.0	0.107
2293	ENSMUSG00000044308.17	Ubr3	chr2	+	69991424	69991637	69991424	69991625	69993675	69993812	2293	64,69,33,77	47,49,44,36	104,50,95,106	60,38,28,33	161	149	0.0364649	0.174048	0.558,0.566,0.41,0.664	0.616,0.549,0.758,0.748	-0.118
2303	ENSMUSG00000029787.10	Avl9	chr6	+	56730641	56730711	56730641	56730680	56735362	56735432	2303	3,1,5,1	15,17,4,9	0,0,0,0	31,9,3,20	180	149	9.90468e-05	0.00139321	0.142,0.046,0.509,0.084	0.0,0.0,0.0,0.0	0.195
2332	ENSMUSG00000036892.12	Prodh2	chr7	+	30493931	30494350	30493931	30494128	30506220	30506301	2332	39,36,23,39	6,0,4,15	32,81,68,84	4,0,2,0	298	149	1.22261e-05	0.000238241	0.765,1.0,0.742,0.565	0.8,1.0,0.944,1.0	-0.168
2342	ENSMUSG00000026944.18	Abca2	chr2	+	25441874	25442111	25441874	25442054	25442190	25442397	2342	22,34,22,29	10,0,0,4	14,29,9,34	0,0,0,0	206	149	9.15173e-06	0.000190571	0.614,1.0,1.0,0.84	1.0,1.0,1.0,1.0	-0.137
2346	ENSMUSG00000025237.16	Parp6	chr9	+	59641023	59641810	59641023	59641096	59648829	59648909	2346	0,3,1,9	11,3,5,15	2,5,6,10	13,0,20,0	298	149	0.0246755	0.12752	0.0,0.333,0.091,0.231	0.071,1.0,0.13,1.0	-0.387
2365	ENSMUSG00000022948.16	Setd4	chr16	-	93590255	93591303	93590873	93591303	93589910	93590085	2365	10,8,7,11	13,29,13,2	6,15,11,9	0,12,3,4	298	149	0.0321059	0.158958	0.278,0.121,0.212,0.733	1.0,0.385,0.647,0.529	-0.304
2366	ENSMUSG00000041375.18	Ccdc9	chr7	-	16284224	16284375	16284270	16284375	16282751	16282850	2366	9,1,3,7	33,9,57,4	0,1,0,0	17,53,15,8	195	149	2.39977e-06	5.66346e-05	0.172,0.078,0.039,0.572	0.0,0.014,0.0,0.0	0.212
2369	ENSMUSG00000028601.18	Echdc2	chr4	+	108169860	108170226	108169860	108169948	108172088	108172175	2369	86,60,83,105	329236247226	185217195216	165210172107	298	149	0	0	0.116,0.113,0.144,0.189	0.359,0.341,0.362,0.502	-0.25
2372	ENSMUSG00000038954.14	Supt3	chr17	+	45041215	45041386	45041215	45041306	45048281	45048392	2372	19,11,7,6	3,1,4,2	16,10,13,5	0,0,0,0	229	149	7.28112e-07	2.03488e-05	0.805,0.877,0.532,0.661	1.0,1.0,1.0,1.0	-0.281
2418	ENSMUSG00000029833.17	Trim24	chr6	+	37945520	37945789	37945520	37945687	37949221	37949398	2418	48,42,44,49	35,50,47,37	21,28,15,12	35,51,55,36	251	149	3.60242e-06	8.05425e-05	0.449,0.333,0.357,0.44	0.263,0.246,0.139,0.165	0.191
2426	ENSMUSG00000022760.17	Thap7	chr16	-	17530677	17530857	17530777	17530857	17530229	17530385	2426	56,44,54,52	76,55,48,35	21,21,40,23	56,63,55,21	249	149	0.0135174	0.0786603	0.306,0.324,0.402,0.471	0.183,0.166,0.303,0.396	0.114
2435	ENSMUSG00000061411.12	Nol4l	chr2	-	153420531	153420809	153420549	153420809	153417959	153418145	2435	0,2,4,0	4,12,7,4	1,6,9,7	4,0,2,5	167	149	0.000122528	0.00163679	0.0,0.129,0.338,0.0	0.182,1.0,0.801,0.555	-0.518
2458	ENSMUSG00000051811.14	Cox6b2	chr7	-	4752060	4752161	4752090	4752161	4751791	4751975	2458	25,29,73,88	1,8,8,6	36,32,36,34	1,0,0,0	179	149	4.65199e-07	1.37234e-05	0.954,0.751,0.884,0.924	0.968,1.0,1.0,1.0	-0.114
2465	ENSMUSG00000032745.18	Gpbp1	chr13	-	111453023	111453423	111453372	111453423	111448932	111448999	2465	122,67,94,89	0,4,16,3	57,57,72,69	8,6,16,5	298	149	0.00890802	0.0564332	1.0,0.893,0.746,0.937	0.781,0.826,0.692,0.873	0.101
2483	ENSMUSG00000078923.10	Ube2v1	chr2	-	167629068	167629288	167629169	167629288	167617828	167617977	2483	42,24,23,16	29,14,33,68	13,4,31,10	33,23,99,29	250	149	0.00294219	0.0224792	0.463,0.505,0.293,0.123	0.19,0.094,0.157,0.17	0.193
2485	ENSMUSG00000029106.14	Add1	chr5	+	34616562	34616907	34616562	34616814	34619349	34619451	2485	25,25,17,35	72,70,71,50	17,6,16,2	61,64,63,30	242	149	0.00105936	0.00953422	0.176,0.18,0.128,0.301	0.146,0.055,0.135,0.039	0.102
2486	ENSMUSG00000047907.11	Tshz2	chr2	+	169884892	169886586	169884892	169886459	170070267	170071816	2486	13,22,18,33	0,2,0,0	17,11,14,21	0,0,13,6	276	149	4.21931e-05	0.000684108	1.0,0.856,1.0,1.0	1.0,1.0,0.368,0.654	0.209
2489	ENSMUSG00000027708.14	Dcun1d1	chr3	-	35920970	35921188	35921112	35921188	35919000	35919169	2489	99178121198	28,8,19,18	150139168162	1,1,3,5	291	149	4.04128e-11	2.86123e-09	0.644,0.919,0.765,0.849	0.987,0.986,0.966,0.943	-0.176
2495	ENSMUSG00000039069.19	Mtg2	chr2	+	180084063	180084312	180084063	180084282	180084450	180084589	2495	5,6,10,17	59,41,27,61	0,0,7,5	48,38,54,80	179	149	3.07929e-05	0.0005361	0.066,0.109,0.236,0.188	0.0,0.0,0.097,0.049	0.113
2504	ENSMUSG00000040918.12	Slc19a2	chr1	+	164256746	164257349	164256746	164257235	164260791	164261017	2504	189276187271	63,35,76,46	292251272228	10,19,33,27	263	149	1.35963e-06	3.56225e-05	0.63,0.817,0.582,0.769	0.943,0.882,0.824,0.827	-0.169
2522	ENSMUSG00000033862.7	Cdk10	chr8	+	123228847	123228934	123228847	123228900	123229111	123229181	2522	1,1,6,2	27,14,14,11	0,2,0,0	18,23,29,38	183	149	0.000639643	0.00634322	0.029,0.055,0.259,0.129	0.0,0.066,0.0,0.0	0.102
2535	ENSMUSG00000042744.16	Hectd4	chr5	+	121292729	121292858	121292729	121292852	121295374	121295499	2535	0,3,0,0	5,9,4,5	5,0,9,5	7,3,10,2	155	149	4.18419e-05	0.000683632	0.0,0.243,0.0,0.0	0.407,0.0,0.464,0.706	-0.334
2539	ENSMUSG00000042726.14	Trafd1	chr5	-	121384744	121384845	121384756	121384845	121384039	121384104	2539	4,6,3,2	12,4,4,2	13,3,5,7	3,0,0,4	161	149	0.000333296	0.00370639	0.236,0.581,0.41,0.481	0.8,1.0,1.0,0.618	-0.427
2553	ENSMUSG00000049550.17	Clip1	chr5	-	123630224	123631169	123630452	123631169	123627293	123627410	2553	79,80,96,50	7,6,8,25	54,75,35,47	26,16,17,13	298	149	0.0078398	0.0514443	0.849,0.87,0.857,0.5	0.509,0.701,0.507,0.644	0.179
2560	ENSMUSG00000029478.16	Ncor2	chr5	-	125028611	125028798	125028620	125028798	125026801	125027217	2560	30,24,17,7	21,24,48,14	15,16,16,14	9,22,10,3	158	149	0.0486005	0.219167	0.574,0.485,0.25,0.32	0.611,0.407,0.601,0.815	-0.201
2563	ENSMUSG00000034211.14	Mrps17	chr5	+	129715683	129715858	129715683	129715763	129716726	129716866	2563	125,92,76,80	49,62,53,87	11,51,53,30	120,98,158,111	244	149	9.99201e-15	1.17906e-12	0.609,0.475,0.467,0.36	0.053,0.241,0.17,0.142	0.326
2564	ENSMUSG00000034211.14	Mrps17	chr5	+	129715683	129715910	129715683	129715763	129716726	129716866	2564	63,102,63,84	49,62,53,87	51,106,52,53	120,98,158,111	296	149	3.25308e-06	7.4296e-05	0.393,0.453,0.374,0.327	0.176,0.353,0.142,0.194	0.171
2565	ENSMUSG00000034211.14	Mrps17	chr5	+	129715683	129715912	129715683	129715763	129716726	129716866	2565	49,64,45,56	49,62,53,87	29,64,45,38	120,98,158,111	298	149	1.35259e-07	4.48892e-06	0.333,0.34,0.298,0.243	0.108,0.246,0.125,0.146	0.147
2566	ENSMUSG00000034211.14	Mrps17	chr5	+	129715683	129715941	129715683	129715763	129716726	129716866	2566	49,64,44,65	49,62,53,87	28,65,45,37	120,98,158,111	298	149	2.01898e-08	8.24674e-07	0.333,0.34,0.293,0.272	0.104,0.249,0.125,0.143	0.154
2567	ENSMUSG00000034211.14	Mrps17	chr5	+	129715683	129715910	129715683	129715858	129716726	129716866	2567	21,53,31,39	83,43,44,35	40,74,12,28	0,19,13,5	201	149	2.09411e-05	0.000379188	0.158,0.477,0.343,0.452	1.0,0.743,0.406,0.806	-0.381
2568	ENSMUSG00000034211.14	Mrps17	chr5	+	129715683	129715912	129715683	129715858	129716726	129716866	2568	7,15,13,11	83,43,44,35	18,32,5,13	0,19,13,5	203	149	1.0996e-05	0.000220335	0.058,0.204,0.178,0.187	1.0,0.553,0.22,0.656	-0.45
2569	ENSMUSG00000034211.14	Mrps17	chr5	+	129715683	129715941	129715683	129715858	129716726	129716866	2569	14,25,17,29	83,43,44,35	24,38,6,15	0,19,13,5	232	149	0.000360089	0.00388238	0.098,0.272,0.199,0.347	1.0,0.562,0.229,0.658	-0.383
2571	ENSMUSG00000034211.14	Mrps17	chr5	+	129715683	129715941	129715683	129715910	129716726	129716866	2571	7,11,5,19	14,39,19,29	7,7,1,3	23,43,7,16	180	149	0.0184847	0.10093	0.293,0.189,0.179,0.352	0.201,0.119,0.106,0.134	0.113
2579	ENSMUSG00000061904.12	Slc25a3	chr10	-	91122107	91122331	91122206	91122331	91119526	91119706	2579	41,109,48,48	6,0,5,8	64,55,42,66	2,0,0,0	248	149	1.76851e-06	4.4718e-05	0.804,1.0,0.852,0.783	0.951,1.0,1.0,1.0	-0.128
2581	ENSMUSG00000041846.15	Ppp4r3a	chr12	-	101053428	101053584	101053467	101053584	101051530	101051662	2581	25,41,33,63	18,15,19,57	30,20,50,24	30,33,50,34	188	149	0.0054071	0.0370474	0.524,0.684,0.579,0.467	0.442,0.324,0.442,0.359	0.172
2608	ENSMUSG00000030815.11	Phkg2	chr7	+	127577534	127577688	127577534	127577646	127579666	127579732	2608	12,20,16,15	4,2,2,2	13,35,22,13	0,0,4,0	191	149	0.00406743	0.0293851	0.701,0.886,0.862,0.854	1.0,1.0,0.811,1.0	-0.127
2616	ENSMUSG00000000148.17	Brat1	chr5	+	140712504	140712901	140712504	140712877	140713052	140713172	2616	0,0,0,0	15,20,19,11	0,1,0,10	12,9,9,2	173	149	0.0167251	0.0922706	0.0,0.0,0.0,0.0	0.0,0.087,0.0,0.812	-0.225
2623	ENSMUSG00000025199.16	Chuk	chr19	-	44077245	44077379	44077262	44077379	44075430	44075530	2623	128153111196	117,73,60,70	254204222233	72,59,37,59	166	149	4.59138e-06	0.000101584	0.495,0.653,0.624,0.715	0.76,0.756,0.843,0.78	-0.163
2628	ENSMUSG00000038722.17	Bud31	chr5	+	145141304	145141436	145141304	145141360	145142447	145142567	2628	239288184405	27,37,16,16	272188304284	3,1,6,2	225	149	3.33067e-16	4.71623e-14	0.854,0.838,0.884,0.944	0.984,0.992,0.971,0.989	-0.104
2669	ENSMUSG00000079478.9	Znrd2	chr19	-	5731438	5731595	5731443	5731595	5731240	5731325	2669	73,42,47,22	133113165124	31,7,13,12	126,117,105,83	154	149	3.69769e-05	0.000608829	0.347,0.264,0.216,0.147	0.192,0.055,0.107,0.123	0.124
2674	ENSMUSG00000038538.17	Ubn2	chr6	+	38463553	38464049	38463553	38464043	38470151	38470222	2674	6,4,0,8	2,2,2,0	0,0,2,0	10,4,21,8	155	149	8.62779e-09	3.73988e-07	0.743,0.658,0.0,1.0	0.0,0.0,0.084,0.0	0.579
2693	ENSMUSG00000000804.14	Usp32	chr11	-	85036479	85036639	85036521	85036639	85032068	85032223	2693	19,20,6,36	7,7,14,7	27,33,52,34	4,4,3,0	191	149	3.67275e-05	0.000608829	0.679,0.69,0.251,0.8	0.84,0.866,0.931,1.0	-0.304
2751	ENSMUSG00000068329.12	Htra2	chr6	-	83052697	83053070	83053000	83053070	83052472	83052542	2751	24,45,21,40	3,6,5,0	36,40,50,30	0,1,2,0	298	149	3.67597e-05	0.000608829	0.8,0.789,0.677,1.0	1.0,0.952,0.926,1.0	-0.153
2753	ENSMUSG00000068329.12	Htra2	chr6	-	83053000	83053070	83053037	83053070	83052472	83052542	2753	3,10,6,2	0,6,2,3	0,1,3,0	4,2,0,2	186	149	0.0039148	0.028574	1.0,0.572,0.706,0.348	0.0,0.286,1.0,0.0	0.335
2792	ENSMUSG00000064302.13	Clasp1	chr1	+	118502852	118502998	118502852	118502969	118503819	118503955	2792	13,15,1,15	0,1,4,4	9,9,10,8	0,0,0,0	178	149	0.000617318	0.00618483	1.0,0.926,0.173,0.758	1.0,1.0,1.0,1.0	-0.286
2799	ENSMUSG00000001151.10	Pcnt	chr10	-	76380162	76380439	76380216	76380439	76379904	76380055	2799	0,8,8,0	10,5,6,7	0,4,1,0	4,16,8,2	203	149	0.0358413	0.171844	0.0,0.54,0.495,0.0	0.0,0.155,0.084,0.0	0.199
2816	ENSMUSG00000024104.11	Washc2	chr6	+	116208206	116208329	116208206	116208327	116208953	116209118	2816	55,60,41,102	4,12,18,4	71,77,102,55	11,1,3,0	151	149	0.000729045	0.0070386	0.931,0.831,0.692,0.962	0.864,0.987,0.971,1.0	-0.102
2822	ENSMUSG00000030172.15	Erc1	chr6	-	119777978	119778071	119777987	119778071	119773733	119773901	2822	3,5,5,8	14,11,10,1	1,0,0,0	12,21,12,15	158	149	5.94831e-09	2.63213e-07	0.168,0.3,0.32,0.883	0.073,0.0,0.0,0.0	0.4
2823	ENSMUSG00000071226.11	Cecr2	chr6	+	120756548	120756937	120756548	120756853	120757565	120757691	2823	14,4,17,21	7,0,5,1	4,4,9,10	13,3,4,4	233	149	0.00696186	0.0462093	0.561,1.0,0.685,0.931	0.164,0.46,0.59,0.615	0.337
2831	ENSMUSG00000008153.12	Clstn3	chr6	-	124432686	124433503	124433407	124433503	124431957	124432160	2831	13,5,13,26	0,0,0,0	17,47,22,13	6,5,0,1	298	149	2.69334e-06	6.21811e-05	1.0,1.0,1.0,1.0	0.586,0.825,1.0,0.867	0.18
2899	ENSMUSG00000002028.13	Kmt2a	chr9	-	44833897	44834020	44833906	44834020	44832860	44833045	2899	10,7,15,5	5,4,1,3	3,0,2,0	6,3,14,19	158	149	1.99735e-10	1.11641e-08	0.654,0.623,0.934,0.611	0.32,0.0,0.119,0.0	0.596
2910	ENSMUSG00000045482.16	Trrap	chr5	+	144839400	144839629	144839400	144839596	144840337	144840603	2910	9,1,11,8	24,7,24,36	3,4,5,0	27,31,37,33	182	149	0.000414261	0.0043559	0.235,0.105,0.273,0.154	0.083,0.096,0.1,0.0	0.122
2925	ENSMUSG00000038784.13	Cnot4	chr6	-	35064888	35065022	35064897	35065022	35056210	35056268	2925	4,7,4,12	7,5,8,15	1,2,1,0	11,14,0,15	158	149	0.000887858	0.0081285	0.35,0.569,0.32,0.43	0.079,0.119,1.0,0.0	0.118
2956	ENSMUSG00000040466.16	Blvrb	chr7	+	27459255	27459633	27459255	27459420	27462566	27462695	2956	74,26,27,30	105,51,28,51	9,13,4,23	0,0,0,0	298	149	0	0	0.261,0.203,0.325,0.227	1.0,1.0,1.0,1.0	-0.746
2976	ENSMUSG00000040225.15	Prrc2c	chr1	-	162679484	162679607	162679499	162679607	162678009	162678228	2976	23,27,27,57	35,33,27,49	13,18,18,15	42,37,30,53	164	149	0.000179817	0.00222053	0.374,0.426,0.476,0.514	0.219,0.307,0.353,0.205	0.176
2997	ENSMUSG00000029267.17	Mtf2	chr5	+	108081136	108081222	108081136	108081218	108086998	108087094	2997	4,4,0,2	0,14,13,5	0,0,0,0	7,7,20,7	153	149	9.64752e-05	0.00137526	1.0,0.218,0.0,0.28	0.0,0.0,0.0,0.0	0.374
3015	ENSMUSG00000032067.6	Pts	chr9	-	50528023	50528232	50528145	50528232	50526869	50526949	3015	6,5,1,0	38,23,29,31	1,10,13,1	23,10,21,33	271	149	0.0130605	0.0774876	0.08,0.107,0.019,0.0	0.023,0.355,0.254,0.016	-0.111
3017	ENSMUSG00000051113.9	Fam71e1	chr7	+	44496914	44497064	44496914	44497033	44497502	44497633	3017	4,10,16,11	6,2,0,1	2,7,0,7	9,1,4,9	180	149	0.00213275	0.0170942	0.356,0.805,1.0,0.901	0.155,0.853,0.0,0.392	0.416
3051	ENSMUSG00000032567.16	Aste1	chr9	+	105396544	105397858	105396544	105396705	105401475	105401686	3051	23,20,3,27	0,1,5,0	15,12,13,12	0,0,0,0	298	149	0.0384846	0.182052	1.0,0.909,0.231,1.0	1.0,1.0,1.0,1.0	-0.215
3052	ENSMUSG00000019822.12	Smpd2	chr10	-	41488428	41488515	41488432	41488515	41488176	41488309	3052	13,6,7,11	52,36,61,58	0,0,1,0	74,67,42,50	153	149	4.78395e-13	4.06444e-11	0.196,0.14,0.101,0.156	0.0,0.0,0.023,0.0	0.143
3060	ENSMUSG00000020196.10	Cabin1	chr10	-	75713452	75713631	75713539	75713631	75699912	75700095	3060	15,27,44,32	2,4,2,0	21,28,23,30	3,8,4,5	236	149	0.00483484	0.034004	0.826,0.81,0.933,1.0	0.815,0.688,0.784,0.791	0.123
3092	ENSMUSG00000030615.12	Tmem126a	chr7	-	90452706	90452900	90452728	90452900	90451542	90451657	3092	107164120176	55,37,19,46	89,109,173,98	18,6,18,17	171	149	0.000346297	0.00379142	0.629,0.794,0.846,0.769	0.812,0.941,0.893,0.834	-0.11
3096	ENSMUSG00000025504.14	Eps8l2	chr7	+	141341892	141342110	141341892	141341974	141342925	141342990	3096	185177125169	37,29,21,6	134,196,101,94	0,1,0,4	285	149	3.33067e-16	4.71623e-14	0.723,0.761,0.757,0.936	1.0,0.99,1.0,0.925	-0.184
3109	ENSMUSG00000063550.8	Nup98	chr7	-	102180376	102180515	102180427	102180515	102176312	102176405	3109	9,14,8,14	21,14,14,19	3,2,14,6	25,17,26,17	200	149	0.00807036	0.0527429	0.242,0.427,0.299,0.354	0.082,0.081,0.286,0.208	0.166
3119	ENSMUSG00000030890.16	Ilk	chr7	+	105741373	105741707	105741373	105741539	105741786	105741908	3119	158141122149	7,13,4,10	143,76,128,110	0,0,0,0	298	149	7.64602e-11	4.56238e-09	0.919,0.844,0.938,0.882	1.0,1.0,1.0,1.0	-0.104
3123	ENSMUSG00000069520.6	Tmem19	chr10	-	115361808	115361959	115361906	115361959	115347645	115347783	3123	52,36,40,54	11,4,12,3	113,58,99,92	7,0,0,0	247	149	1.32252e-08	5.61805e-07	0.74,0.844,0.668,0.916	0.907,1.0,1.0,1.0	-0.185
3151	ENSMUSG00000032637.15	Atxn2l	chr7	-	126492757	126493001	126492811	126493001	126492443	126492608	3151	29,23,15,7	0,0,0,10	1,11,1,5	0,9,1,2	203	149	0.0115366	0.0692195	1.0,1.0,1.0,0.339	1.0,0.473,0.423,0.647	0.199
3152	ENSMUSG00000030714.14	Sgf29	chr7	+	126671537	126671667	126671537	126671660	126671733	126671880	3152	16,21,25,24	4,0,6,1	24,35,14,13	0,0,0,0	156	149	7.03301e-05	0.00105944	0.793,1.0,0.799,0.958	1.0,1.0,1.0,1.0	-0.113
3157	ENSMUSG00000036893.17	Ehmt1	chr2	-	24886996	24887069	24887002	24887069	24884145	24884702	3157	2,1,7,2	11,5,2,9	4,1,2,0	19,18,18,1	155	149	0.0357427	0.171759	0.149,0.161,0.771,0.176	0.168,0.051,0.097,0.0	0.235
3177	ENSMUSG00000030846.15	Tial1	chr7	-	128446730	128447107	128447038	128447107	128446194	128446270	3177	14,51,29,18	2,2,5,0	22,17,25,22	0,0,0,0	298	149	0.000354431	0.00384087	0.778,0.927,0.744,1.0	1.0,1.0,1.0,1.0	-0.138
3203	ENSMUSG00000019082.18	Slc25a22	chr7	-	141433575	141433636	141433592	141433636	141432662	141432753	3203	91,42,124,71	48,29,48,22	57,62,35,49	5,0,2,1	166	149	0	0	0.63,0.565,0.699,0.743	0.911,1.0,0.94,0.978	-0.298
3220	ENSMUSG00000054181.11	A930012O16Rik	chr2	-	57237713	57238508	57237756	57238508	57236226	57236972	3220	2,2,2,0	7,8,1,1	1,1,14,6	0,6,1,1	192	149	0.00212832	0.0170942	0.181,0.162,0.608,0.0	1.0,0.115,0.916,0.823	-0.476
3226	ENSMUSG00000033728.14	Lrrc14	chr15	+	76710642	76711530	76710642	76710927	76712866	76713220	3226	19,6,36,9	25,0,28,1	10,16,9,1	5,43,13,2	298	149	0.0240094	0.125227	0.275,1.0,0.391,0.818	0.5,0.157,0.257,0.2	0.342
3238	ENSMUSG00000026701.15	Prdx6	chr1	-	161250756	161251166	161251021	161251166	161249358	161249469	3238	47,27,36,14	17,27,27,24	10,11,6,4	13,26,43,27	298	149	9.66455e-06	0.000199296	0.58,0.333,0.4,0.226	0.278,0.175,0.065,0.069	0.238
3245	ENSMUSG00000032525.15	Nktr	chr9	+	121738387	121740075	121738387	121738415	121741121	121741151	3245	5,12,3,1	8,10,13,7	14,3,4,1	0,0,7,2	298	149	0.0155328	0.0872798	0.238,0.375,0.103,0.067	1.0,1.0,0.222,0.2	-0.41
3271	ENSMUSG00000036469.16	44256	chr8	+	66456052	66456200	66456052	66456188	66468231	66471625	3271	11,9,10,8	4,0,5,10	2,8,6,4	0,2,1,0	161	149	0.000370736	0.003957	0.718,1.0,0.649,0.425	1.0,0.787,0.847,1.0	-0.211
3275	ENSMUSG00000031858.16	Mau2	chr8	-	70023610	70023697	70023613	70023697	70022619	70022669	3275	14,19,29,40	19,24,18,27	25,29,26,29	8,17,16,15	152	149	0.0356055	0.171759	0.419,0.437,0.612,0.592	0.754,0.626,0.614,0.655	-0.147
3357	ENSMUSG00000001065.15	Zfp276	chr8	+	123258310	123258389	123258310	123258357	123259430	123259514	3357	11,26,21,20	20,15,16,7	33,22,49,18	3,2,17,5	181	149	0.000427009	0.00446781	0.312,0.588,0.519,0.702	0.901,0.901,0.704,0.748	-0.283
3378	ENSMUSG00000031939.16	Taf1d	chr9	+	15315382	15315476	15315382	15315440	15316888	15316970	3378	6,4,13,3	15,0,0,4	2,2,2,2	3,2,3,10	185	149	0.0063048	0.0425124	0.244,1.0,1.0,0.377	0.349,0.446,0.349,0.139	0.334
3390	ENSMUSG00000032041.15	Tirap	chr9	-	35199210	35199319	35199220	35199319	35191573	35191696	3390	15,7,1,22	15,29,18,9	26,13,16,19	13,7,14,9	159	149	0.0113274	0.0683507	0.484,0.184,0.049,0.696	0.652,0.635,0.517,0.664	-0.264
3396	ENSMUSG00000059495.14	Arhgef12	chr9	-	43022810	43022872	43022814	43022872	43020604	43020783	3396	20,32,14,9	40,56,56,68	5,8,0,4	107,52,106,89	153	149	7.73285e-11	4.56238e-09	0.327,0.358,0.196,0.114	0.044,0.13,0.0,0.042	0.195
3429	ENSMUSG00000032030.16	Cul5	chr9	-	53642517	53642826	53642680	53642826	53634971	53635065	3429	20,56,25,40	0,2,7,4	44,28,34,16	0,0,4,0	298	149	0.00229758	0.0181415	1.0,0.933,0.641,0.833	1.0,1.0,0.81,1.0	-0.101
3437	ENSMUSG00000042557.14	Sin3a	chr9	+	57118069	57118171	57118069	57118162	57119092	57119187	3437	13,23,17,13	26,40,23,38	9,3,0,3	34,24,44,50	158	149	3.14458e-08	1.19269e-06	0.32,0.352,0.411,0.244	0.2,0.105,0.0,0.054	0.242
3450	ENSMUSG00000052698.15	Tln2	chr9	-	67227062	67227290	67227107	67227290	67223975	67224101	3450	1,6,0,2	6,18,11,6	1,0,0,0	13,12,18,9	194	149	0.000538229	0.00546985	0.113,0.204,0.0,0.204	0.056,0.0,0.0,0.0	0.116
3462	ENSMUSG00000022263.10	Trio	chr15	-	27742371	27742510	27742383	27742510	27741251	27741279	3462	27,26,34,15	8,1,3,2	8,4,1,15	0,0,0,0	161	149	1.00296e-05	0.000204835	0.757,0.96,0.913,0.874	1.0,1.0,1.0,1.0	-0.124
3466	ENSMUSG00000032407.14	U2surp	chr9	-	95491264	95491300	95491267	95491300	95491090	95491173	3466	11,24,22,18	17,43,22,23	8,6,8,14	36,8,41,28	152	149	0.0089366	0.0564332	0.388,0.354,0.495,0.434	0.179,0.424,0.161,0.329	0.145
3494	ENSMUSG00000032604.16	Qars	chr9	+	108514745	108514844	108514745	108514829	108514966	108515033	3494	14,5,4,7	5,0,8,2	2,9,18,16	0,0,0,0	164	149	1.37549e-07	4.49466e-06	0.718,1.0,0.312,0.761	1.0,1.0,1.0,1.0	-0.302
3511	ENSMUSG00000047036.8	Zfp445	chr9	-	122857066	122857161	122857102	122857161	122856698	122856825	3511	21,27,26,13	41,36,23,39	10,2,16,17	36,31,30,35	185	149	0.0265311	0.135788	0.292,0.377,0.477,0.212	0.183,0.049,0.3,0.281	0.136
3532	ENSMUSG00000112148.1	Lilrb4a	chr10	+	51490962	51491056	51490962	51491051	51491196	51491232	3532	8,20,14,8	17,67,27,29	6,0,4,0	21,19,11,29	154	149	0.00149279	0.012785	0.313,0.224,0.334,0.211	0.217,0.0,0.26,0.0	0.151
3542	ENSMUSG00000031167.16	Rbm3	chrX	-	8143246	8143332	8143250	8143332	8142367	8142955	3542	167183174136	203232222219	37,71,54,39	150195175164	153	149	3.33067e-16	4.71623e-14	0.445,0.434,0.433,0.377	0.194,0.262,0.231,0.188	0.204
3559	ENSMUSG00000000902.13	Smarcb1	chr10	-	75916772	75916911	75916799	75916911	75915063	75915193	3559	8,28,1,24	15,40,4,44	15,5,5,5	29,25,46,39	176	149	0.00115136	0.0102785	0.311,0.372,0.175,0.316	0.305,0.145,0.084,0.098	0.136

## Sheet: 204 MXE events
ID	GeneID	geneSymbol	chr	strand	1stExonStart_0base	1stExonEnd	2ndExonStart_0base	2ndExonEnd	upstreamES	upstreamEE	downstreamES	downstreamEE	ID	IJC_SAMPLE_1	SJC_SAMPLE_1	IJC_SAMPLE_2	SJC_SAMPLE_2	IncFormLen	SkipFormLen	PValue	FDR	IncLevel1	IncLevel2	IncLevelDifference	ABS
27	ENSMUSG00000025860.15	Xiap	chrX	+	42066680	42066802	42068356	42068482	42060393	42060487	42094366	42094717	27	1,0,0,0	21,40,8,53	9,13,1,2	46,30,49,29	271	275	1.05724e-07	2.56205e-05	0.046,0.0,0.0,0.0	0.166,0.305,0.02,0.065	-0.128	0.128
45	ENSMUSG00000025003.6	Cyp2c39	chr19	+	39513172	39513335	39513499	39513649	39510861	39511038	39536735	39536896	45	28,19,23,8	23,16,41,11	18,27,52,27	11,16,23,30	298	298	0.0391111	0.326825	0.549,0.543,0.359,0.421	0.621,0.628,0.693,0.474	-0.136	0.136
51	ENSMUSG00000024805.16	Pcgf5	chr19	+	36444987	36445077	36450563	36450623	36442843	36442942	36455620	36456192	51	56,60,57,47	5,11,12,4	29,35,30,35	3,9,10,20	239	209	0.0156584	0.189727	0.907,0.827,0.806,0.911	0.894,0.773,0.724,0.605	0.114	0.114
82	ENSMUSG00000034108.6	Ccs	chr19	-	4834172	4834310	4838830	4838903	4832832	4832893	4839196	4839254	82	11,24,6,24	10,0,8,0	11,15,34,34	0,2,0,0	222	287	3.02938e-05	0.00214864	0.587,1.0,0.492,1.0	1.0,0.907,1.0,1.0	-0.207	0.207
90	ENSMUSG00000041258.18	Zfp236	chr18	-	82664837	82664981	82668571	82668744	82658002	82658206	82671685	82671810	90	18,28,9,19	16,22,6,11	7,9,5,0	16,7,9,4	298	293	0.0282401	0.268373	0.525,0.556,0.596,0.629	0.301,0.558,0.353,0.0	0.274	0.274
91	ENSMUSG00000033323.14	Ctdp1	chr18	-	80434165	80434328	80445885	80446095	80420442	80420630	80447423	80447565	91	29,16,21,25	31,18,22,29	13,15,15,6	26,32,32,9	298	298	0.00831428	0.123553	0.483,0.471,0.488,0.463	0.333,0.319,0.319,0.4	0.134	0.134
97	ENSMUSG00000024589.18	Nedd4l	chr18	+	65167513	65167573	65174044	65174242	65165571	65165646	65178918	65178996	97	44,65,18,112	117,146,91,154	80,48,88,109	102,144,88,125	209	298	0.0413295	0.335715	0.349,0.388,0.22,0.509	0.528,0.322,0.588,0.554	-0.132	0.132
117	ENSMUSG00000033632.16	AW554918	chr18	+	25339713	25340384	25344863	25344962	25289938	25290066	25399925	25400107	117	2,5,1,0	1,7,10,2	0,2,7,5	7,1,0,0	298	248	0.0057944	0.0969752	0.625,0.373,0.077,0.0	0.0,0.625,1.0,1.0	-0.388	0.388
178	ENSMUSG00000063952.16	Brpf3	chr17	+	28828343	28828441	28831317	28831411	28823972	28824066	28835761	28835916	178	14,32,30,40	24,19,34,20	42,36,53,22	17,15,25,9	247	243	0.0120305	0.16048	0.365,0.624,0.465,0.663	0.709,0.702,0.676,0.706	-0.169	0.169
187	ENSMUSG00000048249.14	Crebrf	chr17	+	26739542	26739668	26742041	26743131	26736788	26736983	26757804	26757999	187	8,16,12,12	22,16,29,16	23,10,9,25	20,11,14,13	275	298	0.0427466	0.342444	0.283,0.52,0.31,0.448	0.555,0.496,0.411,0.676	-0.144	0.144
208	ENSMUSG00000045975.8	C2cd2	chr16	-	97890005	97890118	97892189	97892309	97886087	97886210	97912605	97912704	208	40,70,46,70	17,7,9,15	110,57,104,60	4,4,10,1	269	262	4.07181e-06	0.000493728	0.696,0.907,0.833,0.82	0.964,0.933,0.91,0.983	-0.134	0.134
209	ENSMUSG00000045975.8	C2cd2	chr16	-	97890005	97890118	97912605	97912704	97886087	97886210	97922054	97922606	209	25,41,33,42	15,7,9,15	58,56,75,46	4,4,11,1	248	262	5.82212e-06	0.000651182	0.638,0.861,0.795,0.747	0.939,0.937,0.878,0.98	-0.173	0.173
237	ENSMUSG00000022704.16	Qtrt2	chr16	-	43871620	43871820	43876628	43876841	43868945	43869097	43877956	43878033	237	9,22,21,23	6,16,14,4	15,4,4,9	11,3,19,8	298	298	0.0389284	0.326235	0.6,0.579,0.6,0.852	0.577,0.571,0.174,0.529	0.195	0.195
241	ENSMUSG00000022906.15	Parp9	chr16	+	35943368	35943402	35947500	35948354	35941032	35941135	35953562	35953778	241	29,22,16,35	89,70,78,88	23,4,16,7	78,106,73,77	183	298	0.00229573	0.0529839	0.347,0.339,0.25,0.393	0.324,0.058,0.263,0.129	0.139	0.139
290	ENSMUSG00000036561.9	Ppp6r2	chr15	+	89246257	89246340	89253018	89253261	89243304	89243459	89256662	89256849	290	17,17,17,11	35,43,33,25	24,21,27,14	31,19,42,24	232	298	0.0313869	0.284429	0.384,0.337,0.398,0.361	0.499,0.587,0.452,0.428	-0.121	0.121
298	ENSMUSG00000075517.4	Cyp2d37-ps	chr15	-	82690970	82691145	82691441	82691594	82690361	82690538	82692812	82693148	298	19,12,12,24	9,10,15,23	45,37,38,50	90,68,74,69	298	298	0.0030306	0.0629499	0.679,0.545,0.444,0.511	0.333,0.352,0.339,0.42	0.184	0.184
311	ENSMUSG00000044361.16	BC024139	chr15	-	76121605	76121748	76123958	76124131	76121423	76121526	76124296	76124414	311	2,0,3,0	3,1,5,4	22,7,16,6	10,13,4,20	298	292	0.0120181	0.16048	0.395,0.0,0.37,0.0	0.683,0.345,0.797,0.227	-0.322	0.322
334	ENSMUSG00000039458.15	Mtmr12	chr15	+	12233853	12233926	12236017	12236148	12232755	12232901	12237928	12238019	334	11,8,15,17	9,6,0,0	8,8,10,6	8,16,4,5	222	280	0.00453037	0.0788882	0.607,0.627,1.0,1.0	0.558,0.387,0.759,0.602	0.232	0.232
368	ENSMUSG00000031109.16	Enox2	chrX	-	49168640	49168784	49286855	49286904	49080616	49080751	49288100	49288242	368	6,5,0,15	17,2,12,7	1,0,6,0	17,8,13,6	198	293	0.0155729	0.189727	0.343,0.787,0.0,0.76	0.08,0.0,0.406,0.0	0.351	0.351
370	ENSMUSG00000021993.10	Mipep	chr14	+	60846383	60846503	60872017	60872139	60843207	60843282	60875233	60875307	370	33,41,23,69	35,33,35,45	45,42,37,39	15,24,27,20	269	271	0.0131651	0.171638	0.487,0.556,0.398,0.607	0.751,0.638,0.58,0.663	-0.146	0.146
442	ENSMUSG00000039599.16	Fam149b	chr14	+	20352703	20352839	20356354	20356497	20351311	20351416	20358023	20358140	442	21,33,35,33	27,7,24,14	50,45,57,32	20,10,13,12	285	292	0.0452865	0.357736	0.443,0.828,0.599,0.707	0.719,0.822,0.818,0.732	-0.129	0.129
446	ENSMUSG00000039599.16	Fam149b	chr14	+	20358023	20358140	20359754	20359916	20356354	20356497	20374329	20374390	446	19,9,16,10	0,0,2,0	13,8,8,3	0,5,1,2	266	298	0.00183608	0.0444942	1.0,1.0,0.9,1.0	1.0,0.642,0.9,0.627	0.183	0.183
447	ENSMUSG00000039599.16	Fam149b	chr14	+	20358023	20358140	20363262	20363450	20356354	20356497	20374329	20374454	447	19,9,16,10	12,23,17,18	13,8,8,3	40,32,30,11	266	298	0.0020922	0.0494644	0.639,0.305,0.513,0.384	0.267,0.219,0.23,0.234	0.223	0.223
514	ENSMUSG00000021374.10	Nup153	chr13	-	46707746	46707893	46709628	46709682	46705168	46705215	46709765	46709810	514	2,16,9,21	42,49,43,30	13,10,24,20	20,13,22,31	203	296	0.00148499	0.0375508	0.065,0.323,0.234,0.505	0.487,0.529,0.614,0.485	-0.247	0.247
571	ENSMUSG00000021009.15	Ptpn21	chr12	-	98715023	98715193	98733473	98733834	98710799	98710897	98737364	98737405	571	49,37,30,39	27,44,25,40	3,16,8,7	25,20,20,18	298	298	0.000400893	0.014217	0.645,0.457,0.545,0.494	0.107,0.444,0.286,0.28	0.256	0.256
587	ENSMUSG00000044712.15	Slc38a6	chr12	+	73293698	73293799	73310144	73310197	73292159	73292233	73318976	73319016	587	0,0,0,0	8,17,7,6	0,4,1,2	9,4,6,4	250	202	0.00367573	0.0705742	0.0,0.0,0.0,0.0	0.0,0.447,0.119,0.288	-0.214	0.214
611	ENSMUSG00000043153.6	Crppa	chr12	+	36426288	36426438	36473101	36473206	36390345	36390622	36476699	36476745	611	2,4,9,2	3,7,5,7	6,4,3,8	0,4,7,0	298	254	0.0288415	0.272308	0.362,0.328,0.605,0.196	1.0,0.46,0.268,1.0	-0.309	0.309
612	ENSMUSG00000021144.14	Mta1	chr12	+	113133540	113133576	113135796	113135828	113133184	113133337	113136280	113136432	612	21,15,10,21	50,67,33,45	26,15,21,16	22,30,39,13	185	181	0.00291188	0.0616748	0.291,0.18,0.229,0.313	0.536,0.328,0.345,0.546	-0.186	0.186
616	ENSMUSG00000020672.14	Sntg2	chr12	-	30236588	30236705	30243303	30243342	30229575	30229647	30245117	30245247	616	1,0,0,1	8,3,5,9	2,1,3,0	10,2,8,2	188	266	0.0142908	0.18109	0.15,0.0,0.0,0.136	0.221,0.414,0.347,0.0	-0.174	0.174
643	ENSMUSG00000071454.13	Dtnb	chr12	+	3773550	3773640	3779618	3779654	3772586	3772746	3781105	3781398	643	48,19,27,23	35,21,23,19	32,89,63,54	7,16,10,14	239	185	1.40215e-11	8.15488e-09	0.515,0.412,0.476,0.484	0.78,0.812,0.83,0.749	-0.321	0.321
661	ENSMUSG00000025372.16	Baiap2	chr11	+	119997008	119997090	119997488	119997690	119996522	119996747	119998633	119998702	661	9,16,29,9	92,42,122,74	1,7,5,3	60,90,105,58	231	298	4.09005e-06	0.000493728	0.112,0.33,0.235,0.136	0.021,0.091,0.058,0.063	0.145	0.145
662	ENSMUSG00000020806.15	Rhbdf2	chr11	-	116600060	116600214	116600397	116600498	116598164	116599438	116600609	116600685	662	18,41,36,42	40,47,38,44	36,25,58,21	20,15,34,29	250	298	0.0243211	0.249713	0.349,0.51,0.53,0.532	0.682,0.665,0.67,0.463	-0.14	0.14
733	ENSMUSG00000006288.8	Ttc5	chr14	-	50773276	50773333	50775290	50775382	50772473	50772620	50777261	50777412	733	19,18,12,21	9,8,24,6	16,20,14,15	0,0,3,3	241	206	8.30588e-06	0.000805117	0.643,0.658,0.299,0.749	1.0,1.0,0.8,0.81	-0.315	0.315
746	ENSMUSG00000055670.14	Zzef1	chr11	+	72880570	72880690	72884341	72884471	72876555	72876720	72886633	72886772	746	8,5,19,12	6,21,28,28	30,15,17,23	19,16,23,10	269	279	0.0191957	0.21577	0.58,0.198,0.413,0.308	0.621,0.493,0.434,0.705	-0.188	0.188
752	ENSMUSG00000020828.13	Pld2	chr11	+	70555331	70555381	70555595	70555730	70555050	70555164	70555907	70556061	752	4,4,5,3	27,7,14,5	2,0,0,1	15,6,3,4	199	284	0.000202283	0.00820893	0.175,0.449,0.338,0.461	0.16,0.0,0.0,0.263	0.25	0.25
772	ENSMUSG00000032615.14	Nt5m	chr11	+	59852790	59852891	59860749	59860810	59839446	59839756	59874552	59874667	772	3,2,2,1	16,41,13,45	3,20,2,2	13,15,14,12	250	210	0.00034103	0.0125533	0.136,0.039,0.114,0.018	0.162,0.528,0.107,0.123	-0.153	0.153
779	ENSMUSG00000052298.12	Cdc42se2	chr11	-	54740237	54740550	54756405	54756559	54723573	54723675	54787559	54787646	779	38,62,46,47	57,85,67,76	31,0,36,27	48,53,109,40	298	298	0.0118624	0.159703	0.4,0.422,0.407,0.382	0.392,0.0,0.248,0.403	0.142	0.142
794	ENSMUSG00000020289.15	Nprl3	chr11	-	32253874	32253949	32255438	32255568	32250124	32250278	32263024	32263094	794	8,9,6,9	17,9,11,19	12,6,0,1	25,14,16,15	279	224	0.019223	0.21577	0.274,0.445,0.305,0.276	0.278,0.256,0.0,0.051	0.179	0.179
812	ENSMUSG00000021629.10	Slc30a5	chr13	-	100826451	100826518	100828899	100829022	100824915	100825001	100833100	100833340	812	32,43,33,46	20,28,28,23	66,37,34,24	6,10,15,10	272	216	0.000844648	0.0248801	0.56,0.549,0.483,0.614	0.897,0.746,0.643,0.656	-0.184	0.184
814	ENSMUSG00000023764.18	Sfi1	chr11	-	3155398	3155496	3156771	3156864	3153431	3153498	3157865	3157936	814	2,4,3,1	5,8,4,5	7,9,17,7	2,8,4,4	242	247	0.00047412	0.0156241	0.29,0.338,0.434,0.17	0.781,0.535,0.813,0.641	-0.385	0.385
832	ENSMUSG00000006731.10	B4galnt1	chr10	+	127167700	127167881	127169743	127169842	127167501	127167542	127169977	127170168	832	171175201342	140,113,190,81	215254424344	113,126,94,99	298	248	0.036876	0.316175	0.504,0.563,0.468,0.778	0.613,0.627,0.79,0.743	-0.115	0.115
845	ENSMUSG00000036019.8	Tmtc2	chr10	-	105348434	105348549	105369949	105370778	105323551	105323637	105413216	105413787	845	33,22,10,39	18,27,12,25	18,34,55,36	9,20,25,13	298	264	0.0321106	0.287315	0.619,0.419,0.425,0.58	0.639,0.601,0.661,0.71	-0.142	0.142
861	ENSMUSG00000019935.16	Slc17a8	chr10	-	89592021	89592161	89592875	89592962	89591145	89591295	89597444	89597532	861	4,0,1,0	10,1,8,21	6,17,4,4	13,22,6,13	236	289	0.000206516	0.00822668	0.329,0.0,0.133,0.0	0.361,0.486,0.449,0.274	-0.277	0.277
867	ENSMUSG00000035459.18	Stab2	chr10	-	86859743	86859848	86861367	86861517	86858107	86858215	86863447	86863577	867	80,122,123,85	53,75,93,93	54,113,83,88	87,99,110,85	298	254	0.0144101	0.18109	0.563,0.581,0.53,0.438	0.346,0.493,0.391,0.469	0.103	0.103
881	ENSMUSG00000031381.16	Piga	chrX	+	164427931	164428064	164428539	164428672	164422583	164422986	164428810	164429017	881	6,0,4,0	10,6,6,21	0,0,0,2	7,1,17,5	282	282	0.000351929	0.0127926	0.375,0.0,0.4,0.0	0.0,0.0,0.0,0.286	0.122	0.122
889	ENSMUSG00000097392.3	Thoc2l	chr5	+	104524116	104524148	104524258	104524425	104517422	104522724	104525817	104525972	889	1,1,3,0	3,5,11,1	5,1,0,2	4,1,1,0	181	298	0.00291683	0.0616748	0.354,0.248,0.31,0.0	0.673,0.622,0.0,1.0	-0.346	0.346
923	ENSMUSG00000021870.17	Slmap	chr14	-	26459409	26459460	26459903	26459954	26453537	26453600	26460041	26460210	923	3,8,9,7	9,24,27,6	15,9,24,16	14,9,31,24	200	200	0.048115	0.370945	0.25,0.25,0.25,0.538	0.517,0.5,0.436,0.4	-0.141	0.141
931	ENSMUSG00000029192.17	Tbc1d14	chr5	-	36508359	36508431	36512453	36512548	36507577	36507706	36514038	36514119	931	23,22,6,27	8,6,6,10	13,21,13,14	9,16,12,10	244	221	0.0426373	0.342444	0.723,0.769,0.475,0.71	0.567,0.543,0.495,0.559	0.128	0.128
985	ENSMUSG00000066036.14	Ubr4	chr4	+	139402746	139402832	139406478	139406648	139402508	139402668	139407712	139407995	985	10,33,12,24	32,55,48,66	37,15,37,25	80,28,43,42	235	298	0.0476452	0.36849	0.284,0.432,0.241,0.316	0.37,0.405,0.522,0.43	-0.114	0.114
991	ENSMUSG00000024273.8	2700062C07Rik	chr18	+	24471061	24471084	24472949	24473149	24470868	24470980	24475524	24475724	991	2,7,3,6	46,50,17,74	0,0,0,1	26,16,51,41	172	298	8.19013e-07	0.000140099	0.07,0.195,0.234,0.123	0.0,0.0,0.0,0.041	0.145	0.145
992	ENSMUSG00000024273.8	2700062C07Rik	chr18	+	24471061	24471146	24472949	24473149	24470849	24470980	24475524	24475724	992	4,5,6,1	46,50,17,74	0,1,0,1	26,16,51,41	234	298	4.68675e-05	0.00296284	0.1,0.113,0.31,0.017	0.0,0.074,0.0,0.03	0.109	0.109
998	ENSMUSG00000031885.14	Cbfb	chr8	+	105194474	105194591	105202451	105202578	105178592	105178709	105215903	105217981	998	49,41,49,63	47,31,27,28	18,35,32,19	4,3,13,7	266	276	0.000480348	0.0156241	0.52,0.578,0.653,0.7	0.824,0.924,0.719,0.738	-0.189	0.189
1005	ENSMUSG00000035666.14	Gtf3c4	chr2	-	28830501	28830632	28833549	28835373	28827477	28827566	28839882	28840286	1005	25,33,30,14	34,24,46,22	32,40,18,30	10,13,14,14	298	280	8.94448e-05	0.00448458	0.409,0.564,0.38,0.374	0.75,0.743,0.547,0.668	-0.245	0.245
1008	ENSMUSG00000043962.16	Thrap3	chr4	-	126179911	126180814	126186434	126186588	126177861	126178557	126202569	126202589	1008	55,66,52,76	87,83,111,106	46,26,26,18	77,94,90,79	298	298	0.000483553	0.0156241	0.387,0.443,0.319,0.418	0.374,0.217,0.224,0.186	0.142	0.142
1015	ENSMUSG00000043207.10	Zmpste24	chr4	-	121087308	121087395	121095551	121095698	121083308	121083425	121097876	121098241	1015	99,45,97,28	82,83,70,103	72,101,45,56	55,34,50,50	296	236	0.0276819	0.263931	0.49,0.302,0.525,0.178	0.511,0.703,0.418,0.472	-0.152	0.152
1044	ENSMUSG00000063849.6	Ppcdc	chr9	-	57415085	57415472	57420162	57420291	57412667	57414726	57421125	57421347	1044	13,21,26,25	33,17,51,22	27,23,46,36	12,28,19,15	278	298	0.00399664	0.0726389	0.297,0.57,0.353,0.549	0.707,0.468,0.722,0.72	-0.212	0.212
1080	ENSMUSG00000040451.18	Sgms1	chr19	-	32142745	32142863	32159523	32160363	32129540	32129694	32210827	32211013	1080	13,21,17,5	36,54,41,45	0,4,1,3	21,16,7,16	298	267	0.00383388	0.0714674	0.244,0.258,0.271,0.091	0.0,0.183,0.113,0.144	0.106	0.106
1092	ENSMUSG00000027936.18	Crtc2	chr3	+	90257116	90257218	90259153	90259222	90254162	90254558	90259385	90259492	1092	42,43,71,25	28,13,23,4	62,63,48,62	19,17,6,3	251	218	0.0225433	0.239018	0.566,0.742,0.728,0.844	0.739,0.763,0.874,0.947	-0.111	0.111
1100	ENSMUSG00000035696.15	Rnf38	chr4	-	44158902	44159052	44187448	44187519	44152433	44152553	44233542	44233789	1100	7,9,6,14	6,13,9,5	22,4,21,10	5,2,6,3	220	298	0.00253011	0.0570353	0.612,0.484,0.475,0.791	0.856,0.73,0.826,0.819	-0.217	0.217
1124	ENSMUSG00000073910.10	Mob3b	chr4	-	34985915	34986118	35083769	35084389	34949073	34954047	35157251	35157484	1124	47,18,36,10	63,82,67,106	34,69,28,18	66,61,35,67	298	298	0.0469098	0.364742	0.427,0.18,0.35,0.086	0.34,0.531,0.444,0.212	-0.121	0.121
1137	ENSMUSG00000027698.14	Nceh1	chr3	+	27222667	27222896	27226072	27226142	27182964	27183215	27239531	27239703	1137	204226160170	50,45,64,30	111,132,89,56	30,50,41,36	298	219	0.00833234	0.123553	0.75,0.787,0.648,0.806	0.731,0.66,0.615,0.533	0.113	0.113
1162	ENSMUSG00000039068.16	Zzz3	chr3	+	152422617	152422771	152427276	152428832	152420014	152420140	152446798	152446937	1162	16,17,20,31	8,26,10,26	10,16,10,14	37,18,18,14	298	298	0.0259964	0.259181	0.667,0.395,0.667,0.544	0.213,0.471,0.357,0.5	0.183	0.183
1207	ENSMUSG00000098234.7	Snhg6	chr1	-	9942322	9942391	9942609	9942717	9941958	9942155	9944019	9944118	1207	72,87,77,92	27,12,13,3	39,48,136,50	1,8,1,2	257	218	5.92012e-05	0.00331071	0.693,0.86,0.834,0.963	0.971,0.836,0.991,0.955	-0.101	0.101
1232	ENSMUSG00000004038.9	Gstm3	chr3	-	107967574	107967675	107968135	107968200	107966278	107966374	107968762	107968838	1232	50415751391146	5831068147632	29,10,29,16	18,7,12,3	214	250	0.0242948	0.249713	0.502,0.633,0.525,0.679	0.653,0.625,0.738,0.862	-0.135	0.135
1235	ENSMUSG00000058388.14	Phtf1	chr3	+	103981885	103981955	103982945	103983104	103969753	103969810	103985752	103985909	1235	1,2,2,3	9,11,9,11	0,1,1,0	6,0,1,8	219	298	0.0143962	0.18109	0.131,0.198,0.232,0.271	0.0,1.0,0.576,0.0	-0.186	0.186
1236	ENSMUSG00000058388.14	Phtf1	chr3	+	103987426	103987561	103988614	103988774	103985752	103985909	103991037	103991211	1236	8,15,11,11	13,4,12,6	5,1,6,8	0,0,0,2	284	298	3.27761e-07	5.95706e-05	0.392,0.797,0.49,0.658	1.0,1.0,1.0,0.808	-0.368	0.368
1256	ENSMUSG00000040481.17	Bptf	chr11	-	107086711	107086897	107095001	107095190	107082512	107082700	107095715	107095925	1256	12,11,3,12	0,0,0,0	8,9,14,10	0,0,2,6	298	298	0.00281282	0.0605902	1.0,1.0,1.0,1.0	1.0,1.0,0.875,0.625	0.125	0.125
1264	ENSMUSG00000026836.15	Acvr1	chr2	-	58507276	58507521	58516023	58516300	58500483	58500557	58537777	58537873	1264	4,13,16,7	6,11,1,3	9,3,7,6	2,1,0,1	298	298	0.00149903	0.0375792	0.4,0.542,0.941,0.7	0.818,0.75,1.0,0.857	-0.21	0.21
1265	ENSMUSG00000054252.18	Fgfr3	chr5	+	33731280	33731431	33732116	33732261	33730143	33730334	33732721	33732912	1265	17,53,18,48	4,4,3,14	14,15,21,7	3,19,7,4	298	294	0.00790471	0.119103	0.807,0.929,0.855,0.772	0.822,0.438,0.747,0.633	0.181	0.181
1290	ENSMUSG00000028573.18	Fggy	chr4	+	95820881	95822125	95837584	95837659	95812107	95812169	95844072	95844193	1290	4,4,4,13	58,31,67,63	33,11,27,28	55,66,45,56	298	224	1.35316e-07	2.81072e-05	0.049,0.088,0.043,0.134	0.311,0.111,0.311,0.273	-0.173	0.173
1297	ENSMUSG00000027993.16	Trim2	chr3	-	84208173	84208411	84210172	84210354	84193220	84193372	84259324	84259812	1297	46,74,65,56	57,90,79,95	74,76,123,51	76,62,53,51	298	298	0.0029268	0.0616748	0.447,0.451,0.451,0.371	0.493,0.551,0.699,0.5	-0.131	0.131
1300	ENSMUSG00000037992.16	Rara	chr11	+	98950244	98950795	98966346	98966495	98937697	98937879	98968044	98968186	1300	23,4,28,10	37,35,20,30	10,10,6,9	56,35,54,37	298	298	0.014608	0.181539	0.383,0.103,0.583,0.25	0.152,0.222,0.1,0.196	0.162	0.162
1320	ENSMUSG00000038495.14	Otud7b	chr3	+	96108710	96108768	96130230	96130343	96104526	96104819	96136473	96136624	1320	0,0,0,4	20,24,38,16	4,3,0,3	13,13,12,14	207	262	0.000596606	0.0190652	0.0,0.0,0.0,0.24	0.28,0.226,0.0,0.213	-0.12	0.12
1333	ENSMUSG00000116988.1	Gm49673	chr17	-	8132042	8132088	8134903	8135017	8130224	8130299	8137887	8137958	1333	10,3,7,61	0,1,4,16	5,8,3,60	2,0,0,1	263	195	8.74495e-05	0.00446146	1.0,0.69,0.565,0.739	0.65,1.0,1.0,0.978	-0.159	0.159
1340	ENSMUSG00000027663.12	Zmat3	chr3	-	32345457	32345580	32360889	32361216	32343551	32343718	32365503	32365620	1340	59,13,49,1	35,27,42,53	0,3,0,0	14,6,28,6	298	272	1.30727e-06	0.000211196	0.606,0.305,0.516,0.017	0.0,0.313,0.0,0.0	0.283	0.283
1344	ENSMUSG00000026767.12	Mindy3	chr2	-	12382102	12382183	12386608	12386679	12364446	12364519	12396178	12396258	1344	34,27,41,36	47,26,29,25	29,16,15,32	44,35,29,30	220	230	0.0320922	0.287315	0.431,0.521,0.596,0.601	0.408,0.323,0.351,0.527	0.135	0.135
1345	ENSMUSG00000026767.12	Mindy3	chr2	-	12386608	12386679	12396178	12396258	12382102	12382183	12397492	12397566	1345	26,23,12,26	28,25,26,34	27,27,33,19	31,13,27,11	229	220	0.0300621	0.280105	0.471,0.469,0.307,0.424	0.456,0.666,0.54,0.624	-0.154	0.154
1353	ENSMUSG00000026768.10	Itga8	chr2	-	12119946	12120048	12132438	12132552	12110974	12111097	12140377	12140506	1353	8,31,15,10	9,31,13,24	8,9,15,14	5,5,11,2	263	251	0.0104929	0.148845	0.459,0.488,0.524,0.285	0.604,0.632,0.565,0.87	-0.229	0.229
1354	ENSMUSG00000043323.17	Fbrsl1	chr5	-	110381600	110381646	110396044	110396074	110379268	110379593	110416029	110416065	1354	12,3,6,9	7,8,14,19	0,13,4,5	29,15,28,14	179	195	0.0359509	0.31301	0.651,0.29,0.318,0.34	0.0,0.486,0.135,0.28	0.175	0.175
1355	ENSMUSG00000043323.17	Fbrsl1	chr5	-	110396044	110396074	110416029	110416065	110381600	110381646	110417842	110417947	1355	5,3,13,10	3,8,4,3	6,10,11,6	12,8,25,8	185	179	0.0449102	0.355855	0.617,0.266,0.759,0.763	0.326,0.547,0.299,0.421	0.203	0.203
1383	ENSMUSG00000026743.16	Mllt10	chr2	+	18082510	18082725	18101457	18101512	18071124	18071204	18109781	18109891	1383	5,1,0,2	3,29,17,12	1,0,0,0	26,19,19,15	298	204	0.0166247	0.194156	0.533,0.023,0.0,0.102	0.026,0.0,0.0,0.0	0.158	0.158
1384	ENSMUSG00000026743.16	Mllt10	chr2	+	18101457	18101512	18109781	18109891	18071124	18071204	18122244	18122348	1384	0,11,5,1	10,37,21,29	10,8,3,5	5,3,17,16	204	259	0.00479243	0.0824639	0.0,0.274,0.232,0.042	0.717,0.772,0.183,0.284	-0.352	0.352
1386	ENSMUSG00000026743.16	Mllt10	chr2	+	18146776	18146872	18159455	18159711	18126133	18126229	18162316	18162886	1386	4,10,9,13	40,25,28,28	12,8,7,8	16,20,14,8	245	298	0.0378086	0.318688	0.108,0.327,0.281,0.361	0.477,0.327,0.378,0.549	-0.163	0.163
1392	ENSMUSG00000039210.16	Gpatch2	chr1	+	187322283	187322354	187341486	187341575	187316523	187316563	187348356	187349640	1392	8,6,9,6	17,17,13,7	6,2,3,1	15,10,13,7	220	238	0.0404069	0.33193	0.337,0.276,0.428,0.481	0.302,0.178,0.2,0.134	0.177	0.177
1398	ENSMUSG00000041890.17	Git2	chr5	-	114739032	114739281	114743775	114743880	114733860	114733943	114745428	114745571	1398	3,6,5,1	4,13,19,18	6,2,0,0	13,23,29,18	254	298	0.0263819	0.260063	0.468,0.351,0.236,0.061	0.351,0.093,0.0,0.0	0.168	0.168
1410	ENSMUSG00000030779.16	Rbbp6	chr7	+	122994669	122994738	122996942	122997305	122992399	122992454	122997595	122997697	1410	15,30,13,34	6,7,5,13	21,20,29,18	2,4,7,0	218	298	0.00907552	0.131302	0.774,0.854,0.78,0.781	0.935,0.872,0.85,1.0	-0.117	0.117
1448	ENSMUSG00000028886.15	Eya3	chr4	+	132661894	132661938	132667154	132667234	132656692	132656788	132670188	132670255	1448	7,17,1,14	16,23,13,37	11,20,19,16	17,19,10,23	193	229	0.0153733	0.18943	0.342,0.467,0.084,0.31	0.434,0.555,0.693,0.452	-0.233	0.233
1492	ENSMUSG00000027665.13	Pik3ca	chr3	+	32450261	32450365	32451755	32451927	32449908	32450073	32453860	32453967	1492	27,36,40,42	50,65,40,40	25,25,19,16	49,43,51,40	253	298	0.0257223	0.259181	0.389,0.395,0.541,0.553	0.375,0.406,0.305,0.32	0.118	0.118
1493	ENSMUSG00000040525.13	Cblc	chr7	-	19786182	19786314	19788968	19789056	19785237	19785399	19790399	19790537	1493	48,18,21,42	71,78,32,112	25,18,29,39	106,76,110,104	237	281	0.0364998	0.315862	0.445,0.215,0.438,0.308	0.219,0.219,0.238,0.308	0.106	0.106
1528	ENSMUSG00000039145.16	Camk1d	chr2	-	5445069	5445144	5565648	5565780	5361988	5362127	5714145	5714515	1528	6,8,11,5	9,7,19,15	2,1,0,1	36,12,24,29	281	224	4.41114e-11	1.83251e-08	0.347,0.477,0.316,0.21	0.042,0.062,0.0,0.027	0.305	0.305
1531	ENSMUSG00000026924.17	Sec16a	chr2	-	26421373	26421456	26422007	26422253	26419620	26419770	26423453	26423637	1531	117,74,121,79	41,34,60,39	63,116,81,67	66,62,74,37	298	232	0.00491977	0.084157	0.69,0.629,0.611,0.612	0.426,0.593,0.46,0.585	0.119	0.119
1533	ENSMUSG00000038260.10	Trpm4	chr7	-	45321787	45321887	45321998	45322190	45319241	45319354	45322320	45322382	1533	38,44,47,33	14,25,8,13	18,23,16,29	13,32,24,20	298	249	0.000203247	0.00820893	0.694,0.595,0.831,0.68	0.536,0.375,0.358,0.548	0.246	0.246
1534	ENSMUSG00000044340.7	Phlpp1	chr1	+	106376160	106376291	106380317	106380422	106369013	106369176	106386326	106386521	1534	34,41,40,74	22,19,19,38	51,13,59,21	44,27,38,35	280	254	0.00242424	0.0550758	0.584,0.662,0.656,0.639	0.513,0.304,0.585,0.352	0.197	0.197
1543	ENSMUSG00000032763.11	Ilvbl	chr10	+	78583629	78583701	78583877	78583983	78583463	78583534	78584069	78584479	1543	34,37,44,54	44,25,40,24	57,75,41,49	11,74,14,10	221	255	0.013563	0.175295	0.471,0.631,0.559,0.722	0.857,0.539,0.772,0.85	-0.159	0.159
1555	ENSMUSG00000006010.14	Odr4	chr1	-	150380311	150380377	150381498	150381594	150375495	150375624	150382267	150382408	1555	34,55,34,63	26,21,14,28	30,29,59,44	48,25,41,23	245	215	0.0252875	0.257119	0.534,0.697,0.681,0.664	0.354,0.504,0.558,0.627	0.133	0.133
1564	ENSMUSG00000075225.14	Ccdc162	chr10	-	41546882	41547003	41550721	41550931	41541773	41541901	41552317	41552470	1564	18,9,15,11	1,3,1,1	36,14,21,25	5,10,12,6	298	270	0.00169647	0.0421652	0.942,0.731,0.931,0.909	0.867,0.559,0.613,0.791	0.171	0.171
1569	ENSMUSG00000029167.13	Ppargc1a	chr5	-	51490016	51490090	51490199	51490245	51473495	51474411	51494600	51494805	1569	8,11,13,15	14,30,43,12	22,10,10,19	12,11,16,13	195	223	0.0215782	0.23414	0.395,0.295,0.257,0.588	0.677,0.51,0.417,0.626	-0.174	0.174
1583	ENSMUSG00000050730.17	Arhgap42	chr9	-	9155302	9155364	9180026	9180122	9115689	9115761	9238625	9238900	1583	5,12,17,33	15,16,12,14	45,28,36,56	13,11,23,30	245	211	0.036713	0.315862	0.223,0.392,0.55,0.67	0.749,0.687,0.574,0.617	-0.198	0.198
1630	ENSMUSG00000041303.7	Gtf3c3	chr1	-	54404979	54405170	54405836	54406074	54403510	54403635	54415883	54416019	1630	24,52,30,49	26,90,37,99	62,22,53,51	42,25,54,58	298	298	0.0118086	0.159703	0.48,0.366,0.448,0.331	0.596,0.468,0.495,0.468	-0.101	0.101
1640	ENSMUSG00000032727.14	Mier3	chr13	+	111691235	111691381	111703628	111703763	111687827	111687852	111705221	111705342	1640	0,9,14,1	16,47,35,22	4,5,16,6	13,21,27,12	295	284	0.0195004	0.217269	0.0,0.156,0.278,0.042	0.229,0.186,0.363,0.325	-0.157	0.157
1677	ENSMUSG00000026309.14	Ilkap	chr1	-	91387214	91388464	91390606	91390663	91385239	91385346	91391131	91391197	1677	27,30,17,34	83,78,76,59	31,27,45,31	73,48,39,54	206	298	0.0213236	0.232244	0.32,0.357,0.244,0.455	0.381,0.449,0.625,0.454	-0.133	0.133
1681	ENSMUSG00000057335.11	Cep170	chr1	-	176761350	176761500	176769232	176769526	176758396	176758517	176769712	176769870	1681	9,5,4,5	5,19,10,21	4,5,0,0	18,8,14,7	298	298	0.0415392	0.336479	0.643,0.208,0.286,0.192	0.182,0.385,0.0,0.0	0.191	0.191
1692	ENSMUSG00000052062.14	Pard3b	chr1	+	61767947	61768049	62010306	62010478	61638823	61639362	62076384	62076494	1692	3,3,2,0	2,7,0,5	0,0,0,0	4,7,1,6	251	298	3.23018e-05	0.00223651	0.64,0.337,1.0,0.0	0.0,0.0,0.0,0.0	0.494	0.494
1732	ENSMUSG00000031626.18	Sorbs2	chr8	+	45782801	45782960	45783542	45783626	45775588	45775703	45785268	45785325	1732	74,79,24,77	5,13,9,24	60,31,27,30	30,6,35,18	298	233	0.0027037	0.0595633	0.92,0.826,0.676,0.715	0.61,0.802,0.376,0.566	0.196	0.196
1736	ENSMUSG00000031626.18	Sorbs2	chr8	+	45783542	45783626	45785268	45785325	45782801	45782960	45789975	45790025	1736	14,13,3,17	38,67,16,62	31,6,12,31	29,10,57,18	233	206	0.00342646	0.0689164	0.246,0.146,0.142,0.195	0.486,0.347,0.157,0.604	-0.216	0.216
1737	ENSMUSG00000037022.3	Mmaa	chr8	-	79274103	79274274	79278201	79278324	79270889	79270975	79281176	79281654	1737	30,18,12,23	33,29,29,46	29,16,33,15	20,15,31,13	272	298	0.00392302	0.0726389	0.499,0.405,0.312,0.354	0.614,0.539,0.538,0.558	-0.17	0.17
1741	ENSMUSG00000037921.15	Ddx60	chr8	+	62033374	62033526	62035041	62035104	62023149	62024991	62037034	62037695	1741	4,4,7,0	2,1,11,5	4,5,2,5	3,0,0,1	298	212	0.00121454	0.0321081	0.587,0.74,0.312,0.0	0.487,1.0,1.0,0.781	-0.407	0.407
1794	ENSMUSG00000039988.14	Ankrd13c	chr3	+	157972231	157972317	157972999	157973045	157962277	157962382	157975227	157975294	1794	33,9,24,11	16,8,11,26	9,14,5,14	30,21,14,19	235	195	0.0123862	0.163723	0.631,0.483,0.644,0.26	0.199,0.356,0.229,0.379	0.214	0.214
1800	ENSMUSG00000031575.18	Ash2l	chr8	-	25832639	25832735	25833750	25833846	25831272	25831348	25834959	25835054	1800	40,32,34,61	20,33,27,41	40,19,43,26	36,28,40,63	245	245	0.0161163	0.189744	0.667,0.492,0.557,0.598	0.526,0.404,0.518,0.292	0.144	0.144
1831	ENSMUSG00000039463.14	Slc9a8	chr2	+	167467684	167467767	167468963	167469075	167465340	167465457	167471381	167471602	1831	29,58,36,21	36,31,42,74	32,30,38,30	83,68,105,56	232	261	0.0309739	0.283969	0.475,0.678,0.491,0.242	0.303,0.332,0.289,0.376	0.147	0.147
1838	ENSMUSG00000031392.18	Irak1	chrX	-	74018129	74018366	74019899	74019965	74017129	74017511	74020327	74020535	1838	37,21,37,34	76,43,47,89	40,56,53,24	31,46,56,41	215	298	0.00278263	0.0603873	0.403,0.404,0.522,0.346	0.641,0.628,0.567,0.448	-0.152	0.152
1840	ENSMUSG00000031392.18	Irak1	chrX	-	74022184	74022249	74022472	74022661	74021848	74021963	74022848	74022952	1840	32,45,23,38	80,71,56,69	29,37,37,41	29,40,70,26	298	214	0.00537098	0.0913381	0.223,0.313,0.228,0.283	0.418,0.399,0.275,0.531	-0.144	0.144
1841	ENSMUSG00000031392.18	Irak1	chrX	-	74022184	74022249	74022472	74022664	74021848	74021963	74022848	74022952	1841	90,62,60,93	80,71,56,69	71,74,80,61	29,40,70,26	298	214	0.00648426	0.104886	0.447,0.385,0.435,0.492	0.637,0.571,0.451,0.628	-0.132	0.132
1871	ENSMUSG00000062270.14	Morf4l1	chr9	-	90103654	90103771	90107234	90107302	90102299	90102386	90110125	90110172	1871	237443214160	43,68,55,37	84,121,448,0	68,32,50,46	217	266	0.0107671	0.150533	0.871,0.889,0.827,0.841	0.602,0.823,0.917,0.0	0.272	0.272
1895	ENSMUSG00000027474.13	Ccm2l	chr2	+	153076400	153076464	153078481	153078611	153074771	153074907	153079392	153079531	1895	1,10,9,10	10,11,5,10	3,0,5,2	17,11,14,12	213	279	0.00349152	0.0690703	0.116,0.544,0.702,0.567	0.188,0.0,0.319,0.179	0.311	0.311
1897	ENSMUSG00000040774.15	Cept1	chr3	-	106512802	106512887	106520008	106520093	106505720	106505852	106531136	106531278	1897	192181125217	25,47,70,36	153192139144	32,18,7,2	234	234	1.31324e-05	0.00117667	0.885,0.794,0.641,0.858	0.827,0.914,0.952,0.986	-0.125	0.125
1942	ENSMUSG00000092203.7	1110038B12Rik	chr17	-	34951884	34951925	34952135	34952173	34950240	34950475	34952351	34952471	1942	0,0,0,0	23,12,21,1	0,9,0,2	5,8,2,4	187	190	5.72822e-05	0.00326621	0.0,0.0,0.0,0.0	0.0,0.533,0.0,0.337	-0.218	0.218
1976	ENSMUSG00000039997.16	Ifi203	chr1	-	173928274	173929516	173933782	173933926	173926805	173927222	173935009	173935177	1976	0,12,0,0	9,0,1,1	0,4,3,3	1,0,1,3	293	298	0.00224777	0.0522922	0.0,1.0,0.0,0.0	0.0,1.0,0.753,0.504	-0.314	0.314
1999	ENSMUSG00000053332.13	Gas5	chr1	+	161036819	161036852	161037123	161037164	161036207	161036244	161037287	161037315	1999	91,55,66,48	44,23,31,39	43,48,53,54	24,42,69,38	182	190	0.0271629	0.262592	0.683,0.714,0.69,0.562	0.652,0.544,0.445,0.597	0.103	0.103
2013	ENSMUSG00000005107.13	Slc2a9	chr5	-	38398701	38398889	38436539	38436685	38391713	38391824	38440649	38440774	2013	68,84,34,71	53,37,37,43	30,89,58,58	61,47,86,68	295	298	0.0411012	0.334797	0.564,0.696,0.481,0.625	0.332,0.657,0.405,0.463	0.127	0.127
2016	ENSMUSG00000028797.20	Tmem234	chr4	+	129601406	129601533	129601869	129601961	129600982	129601243	129602194	129602261	2016	56,57,44,32	80,32,51,65	16,33,47,9	65,71,50,72	276	241	0.00675319	0.107903	0.379,0.609,0.43,0.301	0.177,0.289,0.451,0.098	0.176	0.176
2018	ENSMUSG00000028797.20	Tmem234	chr4	+	129601406	129601625	129601869	129601961	129600982	129601243	129602194	129602261	2018	42,31,25,20	80,32,51,65	15,15,35,8	65,71,50,72	298	241	0.0132211	0.171638	0.298,0.439,0.284,0.199	0.157,0.146,0.361,0.082	0.119	0.119
2020	ENSMUSG00000023079.14	Gtf2ird1	chr5	-	134360953	134361146	134363181	134363374	134360237	134360275	134363901	134363979	2020	5,36,16,23	5,0,9,1	14,11,17,12	1,2,2,0	298	298	0.0419503	0.338865	0.5,1.0,0.64,0.958	0.933,0.846,0.895,1.0	-0.144	0.144
2022	ENSMUSG00000025027.18	Xpnpep1	chr19	-	53000388	53000460	53002473	53002551	52999151	52999212	53002678	53002737	2022	38,72,75,59	47,47,85,29	72,53,64,48	30,39,28,15	227	221	0.0131752	0.171638	0.44,0.599,0.462,0.665	0.7,0.57,0.69,0.757	-0.138	0.138
2034	ENSMUSG00000073643.11	Wdfy1	chr1	-	79719123	79719274	79726565	79726716	79717202	79717315	79729655	79729710	2034	15,59,16,91	0,3,5,8	41,29,65,12	3,10,16,7	298	298	0.00415046	0.0740462	1.0,0.952,0.762,0.919	0.932,0.744,0.802,0.632	0.131	0.131
2043	ENSMUSG00000027333.18	Smox	chr2	+	131522058	131522219	131524243	131524333	131520094	131520268	131524742	131525172	2043	61,17,34,29	4,2,0,0	7,0,4,6	3,1,3,0	298	239	0.0482177	0.370945	0.924,0.872,1.0,1.0	0.652,0.0,0.517,1.0	0.407	0.407
2046	ENSMUSG00000037822.12	Smim14	chr5	-	65460523	65460572	65468392	65468501	65453185	65453328	65492735	65492871	2046	117,72,79,99	57,113,63,99	55,66,39,47	82,61,99,76	258	198	0.0186102	0.212568	0.612,0.328,0.49,0.434	0.34,0.454,0.232,0.322	0.129	0.129
2079	ENSMUSG00000012519.14	Mlkl	chr8	-	111314940	111315105	111315492	111315542	111311796	111312077	111316362	111316514	2079	7,8,7,11	4,4,1,6	2,3,4,1	0,0,0,0	199	298	1.67121e-07	3.23992e-05	0.724,0.75,0.913,0.733	1.0,1.0,1.0,1.0	-0.22	0.22
2107	ENSMUSG00000026554.15	Dcaf8	chr1	+	172149248	172149321	172165847	172165918	172148141	172148338	172172328	172172981	2107	50,56,50,73	106,98,105,116	87,112,115,86	104106150115	222	220	0.000426282	0.0144143	0.319,0.362,0.321,0.384	0.453,0.512,0.432,0.426	-0.109	0.109
2147	ENSMUSG00000045100.11	Slc25a26	chr6	+	94576333	94576378	94592411	94592481	94535720	94535768	94598379	94598444	2147	4,9,5,1	22,15,25,10	4,1,0,0	16,13,13,2	194	219	0.00906724	0.131302	0.17,0.404,0.184,0.101	0.22,0.08,0.0,0.0	0.14	0.14
2149	ENSMUSG00000028859.14	Csf3r	chr4	+	126034169	126034339	126035298	126035378	126032111	126032299	126035765	126035979	2149	9,20,9,21	0,9,5,1	2,5,3,4	2,2,5,2	298	229	0.0338157	0.29764	1.0,0.631,0.58,0.942	0.435,0.658,0.316,0.606	0.284	0.284
2156	ENSMUSG00000034903.18	Cobll1	chr2	-	65136344	65136546	65150978	65151164	65133578	65133807	65238362	65238626	2156	17,21,22,13	33,35,55,68	15,19,10,6	68,46,60,44	298	298	0.0349499	0.305208	0.34,0.375,0.286,0.16	0.181,0.292,0.143,0.12	0.106	0.106
2164	ENSMUSG00000015937.15	Macroh2a1	chr13	-	56088251	56088342	56089757	56089857	56084195	56084285	56096123	56096234	2164	208201173189	124131133108	112155165103	147128116122	249	240	0.00329094	0.0675852	0.618,0.597,0.556,0.628	0.423,0.539,0.578,0.449	0.102	0.102
2184	ENSMUSG00000060538.14	Tmem219	chr7	-	126896748	126896938	126897025	126897224	126891602	126891832	126898796	126898923	2184	19,6,25,13	73,65,84,72	9,0,22,0	124,115,113,69	298	298	1.54268e-05	0.00124614	0.207,0.085,0.229,0.153	0.068,0.0,0.163,0.0	0.111	0.111
2259	ENSMUSG00000037174.18	Elf2	chr3	-	51294092	51294188	51299782	51299885	51266752	51266866	51308049	51308215	2259	1,0,4,2	6,5,6,1	5,4,4,1	0,4,1,0	252	245	0.0001742	0.00723677	0.139,0.0,0.393,0.66	1.0,0.493,0.795,1.0	-0.524	0.524
2262	ENSMUSG00000026348.7	Acmsd	chr1	+	127753787	127753881	127758003	127758099	127748988	127749225	127759658	127759831	2262	28,55,73,40	9,26,25,26	10,18,20,25	13,7,32,40	243	245	0.00238979	0.0547205	0.758,0.681,0.746,0.608	0.437,0.722,0.387,0.387	0.215	0.215
2283	ENSMUSG00000021619.6	Atg10	chr13	-	91022569	91022667	91154216	91154312	90937292	90937390	91208317	91208433	2283	1,8,4,6	7,14,3,13	12,6,12,6	4,10,10,4	245	247	0.0392748	0.327253	0.126,0.366,0.573,0.318	0.752,0.377,0.547,0.602	-0.224	0.224
2297	ENSMUSG00000033808.16	Tmem87a	chr2	-	120373910	120373979	120374487	120374559	120371523	120371632	120375418	120375512	2297	0,0,3,0	3,4,6,3	0,0,2,4	2,3,2,0	221	218	0.0474237	0.367755	0.0,0.0,0.33,0.0	0.0,0.0,0.497,1.0	-0.292	0.292
2301	ENSMUSG00000027201.16	Myef2	chr2	-	125097976	125098075	125098449	125098518	125095911	125096120	125098796	125098847	2301	4,5,4,2	7,5,11,4	0,3,0,0	4,6,3,1	218	248	0.000337072	0.0125533	0.394,0.532,0.293,0.363	0.0,0.363,0.0,0.0	0.305	0.305
2307	ENSMUSG00000030760.14	Acer3	chr7	-	98259404	98259457	98261586	98261639	98257695	98257777	98266136	98266247	2307	26,31,27,21	10,5,6,8	12,29,16,12	2,7,0,0	202	202	0.0156436	0.189727	0.722,0.861,0.818,0.724	0.857,0.806,1.0,1.0	-0.135	0.135
2311	ENSMUSG00000001998.15	Ap4e1	chr2	+	127043420	127043543	127043646	127043756	127037785	127037859	127046147	127046287	2311	9,12,9,29	9,11,0,6	7,2,3,8	6,4,7,7	272	259	0.0261326	0.259181	0.488,0.51,1.0,0.822	0.526,0.323,0.29,0.521	0.29	0.29
2316	ENSMUSG00000011658.16	Fuz	chr7	+	44896546	44896645	44896914	44896999	44896251	44896362	44897260	44897329	2316	14,3,4,14	1,0,2,1	13,23,13,8	3,9,10,2	248	234	0.000359528	0.0129075	0.93,1.0,0.654,0.93	0.803,0.707,0.551,0.791	0.166	0.166
2387	ENSMUSG00000051811.14	Cox6b2	chr7	-	4752090	4752161	4752723	4752849	4751791	4751975	4752952	4752972	2387	8,7,0,21	1,4,5,1	1,5,7,7	0,0,0,0	275	220	7.66688e-06	0.000795753	0.865,0.583,0.0,0.944	1.0,1.0,1.0,1.0	-0.402	0.402
2388	ENSMUSG00000051811.14	Cox6b2	chr7	-	4752103	4752161	4752723	4752849	4751793	4751975	4752952	4753009	2388	8,7,0,21	5,5,3,0	1,5,7,7	1,0,2,0	275	207	0.00141805	0.0361726	0.546,0.513,0.0,1.0	0.429,1.0,0.725,1.0	-0.274	0.274
2393	ENSMUSG00000027285.13	Haus2	chr2	+	120613050	120613120	120615854	120615987	120612337	120612430	120617872	120617981	2393	14,7,11,2	40,37,76,46	9,13,10,17	33,23,52,30	219	282	0.0156394	0.189727	0.311,0.196,0.157,0.053	0.26,0.421,0.198,0.422	-0.146	0.146
2422	ENSMUSG00000039069.19	Mtg2	chr2	+	180073139	180073233	180078003	180078142	180071793	180071886	180078618	180078823	2422	7,9,3,2	41,26,42,41	17,15,3,9	50,47,16,23	243	288	0.0067385	0.107903	0.168,0.291,0.078,0.055	0.287,0.274,0.182,0.317	-0.117	0.117
2534	ENSMUSG00000032560.14	Dnajc13	chr9	-	104238464	104238540	104246759	104246840	104237520	104237726	104262698	104262903	2534	2,5,9,0	9,22,24,24	1,3,0,0	11,24,13,16	230	225	0.000888521	0.0250856	0.179,0.182,0.268,0.0	0.082,0.109,0.0,0.0	0.11	0.11
2557	ENSMUSG00000009741.15	Ubp1	chr9	+	113969325	113969416	113970141	113970260	113966491	113966585	113972750	113972893	2557	92,66,92,49	84,123,104,98	13,60,41,30	113,63,148,84	240	268	0.00789378	0.119103	0.55,0.375,0.497,0.358	0.114,0.515,0.236,0.285	0.158	0.158
2601	ENSMUSG00000005225.15	Plekha8	chr6	+	54615214	54615370	54616632	54616757	54613091	54613208	54619193	54619352	2601	103,79,79,133	62,74,109,170	53,64,73,31	95,77,119,68	298	274	0.00921487	0.132658	0.604,0.495,0.4,0.418	0.339,0.433,0.361,0.295	0.122	0.122
2602	ENSMUSG00000059486.11	Kbtbd2	chr6	-	56781800	56781966	56789218	56789700	56777523	56780413	56797458	56797736	2602	35,22,31,14	26,44,41,41	13,48,6,9	60,44,30,52	298	298	0.0494583	0.378486	0.574,0.333,0.431,0.255	0.178,0.522,0.167,0.148	0.145	0.145
2612	ENSMUSG00000040720.15	Virma	chr4	+	11505441	11505610	11506953	11507076	11501308	11501357	11507906	11508179	2612	28,39,18,58	18,43,15,45	35,9,32,13	35,22,46,43	298	272	0.00398598	0.0726389	0.587,0.453,0.523,0.541	0.477,0.272,0.388,0.216	0.188	0.188
2616	ENSMUSG00000031826.20	Usp10	chr8	+	119931848	119931917	119936530	119936588	119910813	119910939	119941112	119942138	2616	8,8,4,10	10,9,9,16	29,12,19,4	7,11,13,7	218	207	0.0410371	0.334797	0.432,0.458,0.297,0.372	0.797,0.509,0.581,0.352	-0.17	0.17
2628	ENSMUSG00000026991.20	Pkp4	chr2	+	59214677	59214814	59289217	59289252	59160849	59161128	59305065	59305197	2628	65,69,70,80	21,13,15,15	22,47,67,24	32,19,20,12	286	184	0.00342986	0.0689164	0.666,0.773,0.75,0.774	0.307,0.614,0.683,0.563	0.199	0.199
2647	ENSMUSG00000004837.2	Grap	chr11	+	61660221	61660319	61664184	61664307	61653264	61653424	61669835	61670004	2647	2,7,8,12	15,16,24,15	0,0,7,0	15,15,6,5	247	272	0.00717663	0.114042	0.128,0.325,0.269,0.468	0.0,0.0,0.562,0.0	0.157	0.157
2652	ENSMUSG00000002871.14	Tpra1	chr6	+	88910340	88910401	88910547	88910650	88910150	88910261	88910796	88910877	2652	15,43,19,28	31,45,36,55	21,24,23,25	16,19,26,33	210	252	0.0377524	0.318688	0.367,0.534,0.388,0.379	0.612,0.603,0.515,0.476	-0.134	0.134
2670	ENSMUSG00000066621.12	Tecpr1	chr5	-	144199729	144199786	144200814	144200894	144199128	144199309	144201011	144201108	2670	23,9,14,17	3,5,2,6	6,8,14,8	7,1,15,5	229	206	0.0328555	0.291975	0.873,0.618,0.863,0.718	0.435,0.878,0.456,0.59	0.178	0.178
2690	ENSMUSG00000030172.15	Erc1	chr6	-	119777987	119778071	119779476	119779632	119773733	119773901	119783388	119783463	2690	53,39,37,55	10,10,8,1	34,18,60,33	7,16,10,15	298	233	0.0230523	0.241411	0.806,0.753,0.783,0.977	0.792,0.468,0.824,0.632	0.151	0.151
2701	ENSMUSG00000059908.9	Mug1	chr6	+	121876419	121876471	121878484	121878568	121875429	121875937	121878910	121879087	2701	7043494451548	1814119613452970	272272813222155	7.77657e+16	201	233	8.2576e-08	2.18301e-05	0.31,0.253,0.277,0.376	0.289,0.128,0.152,0.188	0.115	0.115
2704	ENSMUSG00000059908.9	Mug1	chr6	+	121882581	121882805	121884183	121884402	121881681	121881862	121884561	121884689	2704	3093162923515090	83660619476718	1.06651e+19	419632232547517	298	298	3.5227e-06	0.000465636	0.787,0.729,0.547,0.431	0.718,0.76,0.869,0.964	-0.204	0.204
2710	ENSMUSG00000026932.14	Nacc2	chr2	-	26062191	26062297	26064453	26064618	26061572	26061670	26089542	26090482	2710	25,13,16,15	25,7,33,20	13,18,8,7	25,28,19,30	298	255	0.0370766	0.316184	0.461,0.614,0.293,0.391	0.308,0.355,0.265,0.166	0.166	0.166
2711	ENSMUSG00000026932.14	Nacc2	chr2	-	26064453	26064618	26089542	26090482	26062191	26062297	26122688	26122818	2711	15,19,16,4	13,25,28,25	0,11,10,4	31,37,29,24	298	298	0.00381174	0.0714674	0.536,0.432,0.364,0.138	0.0,0.229,0.256,0.143	0.21	0.21
2735	ENSMUSG00000021838.17	Samd4	chr14	+	47016276	47016795	47052849	47053113	46884398	46885016	47064219	47064329	2735	32,76,10,67	5,11,5,10	25,15,24,13	2,0,0,2	298	298	0.000113449	0.00532114	0.865,0.874,0.667,0.87	0.926,1.0,1.0,0.867	-0.129	0.129
2744	ENSMUSG00000030199.16	Etv6	chr6	+	134066306	134066465	134137284	134137417	134035699	134036138	134222864	134223029	2744	29,25,22,27	33,24,53,42	12,12,18,15	40,36,47,34	298	282	0.00582631	0.0969752	0.454,0.496,0.282,0.378	0.221,0.24,0.266,0.295	0.147	0.147
2761	ENSMUSG00000068250.13	Amn1	chr6	-	149169302	149169404	149169447	149169504	149166805	149166917	149170832	149171050	2761	9,6,29,39	6,1,1,1	18,18,24,23	0,0,0,0	206	251	0.00561417	0.0949187	0.646,0.88,0.972,0.979	1.0,1.0,1.0,1.0	-0.131	0.131
2790	ENSMUSG00000025159.8	Mms19	chr19	-	41962799	41962861	41962949	41963034	41957857	41957944	41963400	41963470	2790	1,1,7,2	19,24,23,5	0,2,0,0	14,10,17,22	234	211	0.000662434	0.0209387	0.045,0.036,0.215,0.265	0.0,0.153,0.0,0.0	0.102	0.102
2806	ENSMUSG00000037262.7	Kin	chr2	+	10085729	10085824	10090112	10090156	10080623	10080744	10090240	10090363	2806	19,22,19,17	1,6,1,2	25,15,16,20	4,9,4,5	244	193	0.0273584	0.262592	0.938,0.744,0.938,0.871	0.832,0.569,0.76,0.76	0.143	0.143
2815	ENSMUSG00000024645.5	Timm21	chr18	-	84948022	84948096	84949193	84949291	84947833	84947939	84949389	84949452	2815	35,42,8,44	28,16,8,18	34,35,33,34	14,5,14,7	247	223	0.0267881	0.261409	0.53,0.703,0.474,0.688	0.687,0.863,0.68,0.814	-0.162	0.162
2818	ENSMUSG00000044456.16	Rin3	chr12	+	102312974	102313182	102325794	102325912	102283047	102283326	102350881	102350954	2818	28,33,26,15	22,25,19,22	43,45,23,21	17,14,20,12	298	267	0.0315251	0.284705	0.533,0.542,0.551,0.379	0.694,0.742,0.507,0.611	-0.137	0.137
2853	ENSMUSG00000093456.7	Gm20662	chr9	+	108031998	108032209	108040904	108041086	108024102	108024450	108044724	108044900	2853	83112100142	125,159,89,128	127,99,155,107	102,99,70,80	298	298	0.00782502	0.119103	0.399,0.413,0.529,0.526	0.555,0.5,0.689,0.572	-0.112	0.112
2860	ENSMUSG00000038535.17	Zfp280d	chr9	+	72301700	72301766	72301866	72302006	72298701	72298848	72307950	72308068	2860	3,9,2,3	16,28,22,25	15,1,8,5	12,2,26,13	215	289	0.00726751	0.114237	0.201,0.302,0.109,0.139	0.627,0.402,0.293,0.341	-0.228	0.228
2863	ENSMUSG00000038535.17	Zfp280d	chr9	+	72339011	72339048	72351524	72351570	72338745	72338864	72360285	72360341	2863	3,13,7,5	0,2,5,0	9,2,1,8	3,3,7,6	186	195	0.0046636	0.0807247	1.0,0.872,0.595,1.0	0.759,0.411,0.13,0.583	0.396	0.396
2883	ENSMUSG00000032089.16	Il10ra	chr9	-	45266454	45266642	45267099	45267220	45265488	45265655	45269005	45269149	2883	12,0,15,0	16,25,35,11	10,10,12,2	10,10,3,8	270	298	0.00381648	0.0714674	0.453,0.0,0.321,0.0	0.525,0.525,0.815,0.216	-0.327	0.327
2911	ENSMUSG00000074071.11	Fam169b	chr7	+	68300832	68300963	68304551	68304651	68275994	68276041	68350233	68350416	2911	9,2,9,19	9,2,8,4	7,2,16,3	0,2,0,0	280	249	4.24457e-06	0.000493728	0.471,0.471,0.5,0.809	1.0,0.471,1.0,1.0	-0.305	0.305
2925	ENSMUSG00000063929.6	Cyp4a32	chr4	+	115602259	115602404	115606644	115606772	115600974	115601163	115609626	115609751	2925	290222328389	233131195178	595476803708	281110276296	294	277	5.35452e-05	0.00315292	0.54,0.615,0.613,0.673	0.666,0.803,0.733,0.693	-0.114	0.114
2932	ENSMUSG00000038482.11	Tfdp1	chr8	+	13357042	13357109	13365088	13365195	13339664	13339739	13369458	13369580	2932	2,10,6,24	32,58,47,56	19,16,15,10	34,44,23,42	216	256	0.0106074	0.149739	0.069,0.17,0.131,0.337	0.398,0.301,0.436,0.22	-0.162	0.162
2946	ENSMUSG00000058761.5	Rnf169	chr7	-	99935161	99935280	99942958	99943105	99927092	99927192	99955466	99955540	2946	33,23,24,21	42,32,48,40	10,27,24,37	62,61,96,53	296	268	0.0186399	0.212568	0.416,0.394,0.312,0.322	0.127,0.286,0.185,0.387	0.115	0.115
2949	ENSMUSG00000030704.14	Rab6a	chr7	+	100629665	100629771	100629837	100629943	100628403	100628457	100631741	100631853	2949	91,105,69,116	197229165220	56,31,52,31	187178194169	255	255	2.99814e-08	1.08983e-05	0.316,0.314,0.295,0.345	0.23,0.148,0.211,0.155	0.132	0.132
2955	ENSMUSG00000003402.14	Prkcsh	chr9	+	22012218	22012308	22012678	22012753	22012033	22012103	22012835	22012935	2955	117141172152	145121185105	189154150136	64,141,61,59	239	224	0.000442999	0.0148074	0.431,0.522,0.466,0.576	0.735,0.506,0.697,0.684	-0.157	0.157
2959	ENSMUSG00000026837.16	Col5a1	chr2	+	28028966	28029035	28029096	28029165	28025592	28025705	28032590	28032824	2959	22,19,2,27	21,10,27,29	2,8,2,2	35,9,10,25	218	218	0.00583585	0.0969752	0.512,0.655,0.069,0.482	0.054,0.471,0.167,0.074	0.238	0.238
2962	ENSMUSG00000036528.16	Ppfibp2	chr7	+	107637213	107637310	107653017	107653232	107595265	107595379	107681761	107681854	2962	10,34,9,41	40,46,60,72	55,21,57,44	85,55,40,43	246	298	0.0234735	0.243789	0.232,0.472,0.154,0.408	0.439,0.316,0.633,0.553	-0.169	0.169
2987	ENSMUSG00000025036.7	Sfxn2	chr19	+	46591492	46591542	46592299	46592347	46591120	46591170	46594671	46594868	2987	21,30,27,36	27,57,57,50	55,29,76,45	48,55,45,44	199	197	0.0208399	0.229554	0.435,0.343,0.319,0.416	0.531,0.343,0.626,0.503	-0.123	0.123
3000	ENSMUSG00000030846.15	Tial1	chr7	-	128446730	128446798	128447038	128447107	128446194	128446270	128448120	128448208	3000	3,11,16,0	4,21,13,14	1,0,2,2	16,14,17,23	218	217	4.9488e-05	0.0030107	0.427,0.343,0.551,0.0	0.059,0.0,0.105,0.08	0.269	0.269
3002	ENSMUSG00000030849.18	Fgfr2	chr7	-	130198418	130198563	130199757	130199905	130196171	130196374	130200982	130201173	3002	40,39,10,14	74,150,57,111	18,39,21,26	31,51,34,44	297	294	3.39949e-05	0.002299	0.349,0.205,0.148,0.111	0.365,0.431,0.379,0.369	-0.183	0.183
3006	ENSMUSG00000054612.4	Mgmt	chr7	+	136951267	136951404	137085948	137086109	136894613	136894687	137121488	137121628	3006	43,45,33,54	91,56,65,102	16,0,40,0	75,42,126,43	286	298	1.27965e-07	2.81072e-05	0.33,0.456,0.346,0.356	0.182,0.0,0.249,0.0	0.264	0.264
3038	ENSMUSG00000042213.17	Zfand4	chr6	+	116284739	116284815	116285853	116285921	116273572	116273872	116287981	116288168	3038	1,9,13,6	0,0,7,2	9,4,9,8	9,2,13,13	225	217	0.00114894	0.0309364	1.0,1.0,0.642,0.743	0.491,0.659,0.4,0.372	0.366	0.366
3052	ENSMUSG00000036501.7	Fam13b	chr18	-	34497333	34497546	34497967	34498159	34494598	34494776	34499685	34499852	3052	5,1,15,27	31,14,13,14	25,25,57,45	9,26,14,13	298	298	0.001277	0.0331563	0.139,0.067,0.536,0.659	0.735,0.49,0.803,0.776	-0.351	0.351
3056	ENSMUSG00000031516.11	Dctn6	chr8	-	34098918	34099101	34104985	34105039	34097188	34097294	34106341	34106406	3056	2,6,15,7	4,1,4,3	11,6,4,7	4,14,3,13	203	298	0.0459057	0.3597	0.423,0.898,0.846,0.774	0.801,0.386,0.662,0.441	0.163	0.163
3058	ENSMUSG00000026313.16	Hdac4	chr1	-	92012668	92012819	92029954	92030196	92002154	92002275	92054900	92054972	3058	11,17,4,6	5,4,16,3	9,15,20,8	4,3,1,0	298	298	0.00273347	0.0597663	0.688,0.81,0.2,0.667	0.692,0.833,0.952,1.0	-0.278	0.278
3084	ENSMUSG00000074272.10	Ceacam1	chr7	-	25466316	25466437	25471797	25472073	25465467	25465520	25476343	25476703	3084	65,102,87,109	78124154206	101,66,91,108	183106527336	298	270	0.00138778	0.0357139	0.43,0.427,0.339,0.324	0.333,0.361,0.135,0.226	0.116	0.116
3109	ENSMUSG00000038250.9	Usp38	chr8	-	81001052	81001154	81005331	81005461	80995681	80995840	81012166	81012302	3109	33,23,31,19	16,45,17,31	32,31,9,15	41,36,48,41	279	251	0.0375463	0.318323	0.65,0.315,0.621,0.355	0.413,0.437,0.144,0.248	0.175	0.175
3112	ENSMUSG00000071072.12	Ptges3	chr10	+	128070133	128070232	128072067	128072157	128069215	128069285	128074221	128074284	3112	109173116230	131,114,77,61	87,72,148,104	24,41,22,2	248	239	0.000151785	0.00658791	0.445,0.594,0.592,0.784	0.777,0.629,0.866,0.98	-0.209	0.209
3115	ENSMUSG00000031652.11	N4bp1	chr8	-	86851624	86851721	86853158	86853289	86848446	86848554	86860425	86862110	3115	18,12,5,14	11,16,9,17	12,15,18,22	5,2,8,4	280	246	0.000115827	0.00534644	0.59,0.397,0.328,0.42	0.678,0.868,0.664,0.829	-0.326	0.326
3117	ENSMUSG00000031665.7	Sall1	chr8	-	89029943	89033398	89042351	89042444	89027234	89028818	89044029	89044162	3117	3,3,9,2	9,67,29,57	0,5,3,0	28,63,72,22	242	298	0.0142067	0.18109	0.291,0.052,0.276,0.041	0.0,0.089,0.049,0.0	0.131	0.131
3125	ENSMUSG00000069922.12	Ces3a	chr8	+	105053355	105053448	105053543	105053684	105051731	105051836	105055578	105055659	3125	13801547371565	10101205271711	3290250634213140	4326281156104590	242	290	3.71253e-08	1.19956e-05	0.621,0.606,0.626,0.523	0.477,0.517,0.422,0.45	0.128	0.128
3139	ENSMUSG00000003847.16	Nfat5	chr8	+	107295580	107295634	107324638	107324764	107293469	107293898	107338294	107338356	3139	1,2,2,3	19,26,8,15	11,7,9,6	14,7,36,24	203	275	0.000885931	0.0250856	0.067,0.094,0.253,0.213	0.516,0.575,0.253,0.253	-0.242	0.242
3173	ENSMUSG00000033411.16	Ctdspl2	chr2	+	121978891	121979041	121981151	121981364	121977330	121977469	121986948	121987027	3173	15,13,12,13	18,27,19,32	21,9,16,18	13,13,17,11	298	298	0.0115453	0.157623	0.455,0.325,0.387,0.289	0.618,0.409,0.485,0.621	-0.169	0.169
3199	ENSMUSG00000042790.16	Rnf214	chr9	-	45899745	45900256	45904769	45904919	45898431	45898491	45906737	45906861	3199	4,6,4,9	18,35,23,47	23,11,18,21	48,20,35,31	298	298	2.06267e-05	0.00155029	0.182,0.146,0.148,0.161	0.324,0.355,0.34,0.404	-0.197	0.197
3209	ENSMUSG00000032311.17	Nrg4	chr9	-	55249095	55249169	55280889	55280983	55242060	55242207	55282550	55282616	3209	13,13,13,14	3,12,9,28	5,4,3,14	13,6,19,20	243	223	0.0137749	0.177245	0.799,0.499,0.57,0.315	0.261,0.38,0.127,0.391	0.256	0.256
3238	ENSMUSG00000032342.13	Mto1	chr9	+	78449717	78449835	78452763	78453053	78449418	78449618	78457209	78457322	3238	23,13,30,22	30,32,23,54	8,11,8,16	50,31,34,33	267	298	0.0079457	0.119104	0.461,0.312,0.593,0.313	0.152,0.284,0.208,0.351	0.171	0.171
3240	ENSMUSG00000033577.18	Myo6	chr9	+	80293526	80293553	80293944	80293974	80292356	80292517	80296642	80296681	3240	10,4,15,3	0,1,0,2	8,11,3,2	2,1,2,3	176	179	0.00357808	0.069367	1.0,0.803,1.0,0.604	0.803,0.918,0.604,0.404	0.169	0.169
3254	ENSMUSG00000032411.15	Tfdp2	chr9	+	96232681	96232748	96273838	96273942	96223093	96223198	96287600	96287722	3254	9,10,8,5	17,61,34,34	2,1,5,4	43,15,32,35	216	253	0.00851488	0.125057	0.383,0.161,0.216,0.147	0.052,0.072,0.155,0.118	0.128	0.128
3288	ENSMUSG00000060450.14	Rnf14	chr18	+	38298308	38298395	38299753	38299926	38297465	38297575	38300428	38300590	3288	32,13,14,25	153145111171	27,32,54,35	149107117105	236	298	4.96952e-05	0.0030107	0.209,0.102,0.137,0.156	0.186,0.274,0.368,0.296	-0.13	0.13
3294	ENSMUSG00000057802.8	Gm10030	chr9	+	111006342	111006430	111006776	111006939	111005851	111005938	111007452	111008029	3294	3,4,1,4	0,1,1,1	11,2,2,3	0,5,8,0	237	298	0.00856699	0.12519	1.0,0.834,0.557,0.834	1.0,0.335,0.239,1.0	0.163	0.163
3305	ENSMUSG00000056167.8	Cnot10	chr9	-	114629006	114629157	114631821	114631983	114627392	114627535	114632676	114632771	3305	24,47,35,49	39,68,68,50	46,59,74,36	60,46,41,36	298	298	0.0112832	0.155505	0.381,0.409,0.34,0.495	0.434,0.562,0.643,0.5	-0.129	0.129

## Sheet: 1104 SE events
ID	GeneID	geneSymbol	chr	strand	exonStart_0base	exonEnd	upstreamES	upstreamEE	downstreamES	downstreamEE	ID	IJC_SAMPLE_1	SJC_SAMPLE_1	IJC_SAMPLE_2	SJC_SAMPLE_2	IncFormLen	SkipFormLen	PValue	FDR	IncLevel1	IncLevel2	IncLevelDifference	ABS
189	ENSMUSG00000044583.13	Tlr7	chrX	-	167308788	167308856	167304928	167308485	167330000	167330099	189	0,0,0,2	11,25,4,10	2,2,0,2	4,0,11,2	217	149	0.0111897	0.161839	0.0,0.0,0.0,0.121	0.256,1.0,0.0,0.407	-0.386	0.386
240	ENSMUSG00000025287.15	Acot9	chrX	+	155264035	155264093	155262504	155262674	155269658	155269753	240	5,1,16,2	56,25,16,24	0,0,0,0	11,16,15,8	207	149	3.81931e-06	0.00028466	0.06,0.028,0.419,0.057	0.0,0.0,0.0,0.0	0.141	0.141
257	ENSMUSG00000041115.16	Iqsec2	chrX	+	152180996	152181092	152178963	152179090	152193865	152194601	257	5,3,7,11	3,10,7,0	11,21,8,4	2,0,0,0	245	149	6.65019e-07	7.42404e-05	0.503,0.154,0.378,1.0	0.77,1.0,1.0,1.0	-0.434	0.434
283	ENSMUSG00000025264.12	Tsr2	chrX	-	151096164	151096255	151091675	151091767	151096428	151096523	283	35,34,32,35	4,5,4,0	27,28,52,21	0,0,0,0	240	149	2.2704e-06	0.000193871	0.845,0.808,0.832,1.0	1.0,1.0,1.0,1.0	-0.129	0.129
301	ENSMUSG00000047045.17	Tmem164	chrX	+	142682290	142682949	142681417	142681556	142752039	142752089	301	6,18,6,5	2,0,4,3	9,17,31,9	0,0,0,0	298	149	8.97765e-07	9.44962e-05	0.6,1.0,0.429,0.455	1.0,1.0,1.0,1.0	-0.379	0.379
341	ENSMUSG00000067369.12	Trmt2b	chrX	-	134270509	134270585	134267330	134267561	134276845	134276920	341	5,2,2,0	30,18,24,5	4,8,20,5	13,37,17,0	225	149	0.00123891	0.0289131	0.099,0.069,0.052,0.0	0.169,0.125,0.438,1.0	-0.378	0.378
369	ENSMUSG00000086629.8	2810403D21Rik	chrX	+	108871471	108871598	108836228	108836355	108886344	108886690	369	1,10,8,11	1,0,5,0	5,2,7,3	3,0,6,2	276	149	0.0277792	0.312984	0.351,1.0,0.463,1.0	0.474,1.0,0.386,0.447	0.127	0.127
386	ENSMUSG00000031229.16	Atrx	chrX	-	105910573	105910643	105899880	105899993	105911469	105911654	386	0,0,1,0	1,8,2,5	1,2,2,1	0,4,0,11	219	149	0.0175809	0.22601	0.0,0.0,0.254,0.0	1.0,0.254,1.0,0.058	-0.514	0.514
481	ENSMUSG00000031328.16	Flna	chrX	-	74232966	74232990	74230505	74230753	74233148	74233338	481	24,19,8,13	34,78,26,41	1,4,2,5	19,20,19,24	173	149	0.00172439	0.0372298	0.378,0.173,0.209,0.215	0.043,0.147,0.083,0.152	0.137	0.137
563	ENSMUSG00000025860.15	Xiap	chrX	+	42068356	42068482	42059678	42059851	42094366	42094717	563	20,40,10,53	0,0,3,6	55,30,44,23	0,2,0,0	275	149	0.00385516	0.0700611	1.0,1.0,0.644,0.827	1.0,0.89,1.0,1.0	-0.105	0.105
581	ENSMUSG00000059708.12	Akap17b	chrX	-	36623567	36624336	36618602	36618733	36636472	36636574	581	1,0,0,2	0,2,2,0	4,1,1,2	0,0,4,0	298	149	0.00138755	0.0315261	1.0,0.0,0.0,1.0	1.0,1.0,0.111,1.0	-0.278	0.278
630	ENSMUSG00000064127.13	Med14	chrX	-	12703212	12703482	12696152	12696290	12703750	12703903	630	34,27,16,48	1,2,10,1	36,29,42,25	0,0,0,0	298	149	4.0951e-06	0.000301727	0.944,0.871,0.444,0.96	1.0,1.0,1.0,1.0	-0.195	0.195
656	ENSMUSG00000039382.12	Wdr45	chrX	+	7723314	7723753	7722354	7722378	7723848	7723920	656	25,0,0,5	60,42,65,0	0,1,0,3	27,65,9,17	298	149	0.00850402	0.130692	0.172,0.0,0.0,1.0	0.0,0.008,0.0,0.081	0.271	0.271
657	ENSMUSG00000039382.12	Wdr45	chrX	+	7723564	7723753	7722249	7722378	7723848	7723920	657	26,0,0,5	60,42,65,0	0,0,0,3	27,65,9,17	298	149	0.00643173	0.104644	0.178,0.0,0.0,1.0	0.0,0.0,0.0,0.081	0.274	0.274
690	ENSMUSG00000025089.15	Gfra1	chr19	-	58392572	58392587	58300241	58300578	58451968	58452052	690	0,0,0,0	267206255300	346,0,0,292	246288394300	164	149	2.62389e-08	5.01222e-06	0.0,0.0,0.0,0.0	0.561,0.0,0.0,0.469	-0.258	0.258
738	ENSMUSG00000025026.15	Add3	chr19	+	53159379	53159632	53143004	53143089	53216800	53216935	738	3,3,1,0	12,3,15,2	0,0,0,0	2,11,20,11	298	149	0.0407541	0.421736	0.111,0.333,0.032,0.0	0.0,0.0,0.0,0.0	0.119	0.119
751	ENSMUSG00000064105.13	Cnnm2	chr19	+	46871655	46871721	46868537	46868631	46877207	46877392	751	5,10,3,15	5,6,15,17	10,6,21,9	0,3,25,3	215	149	0.0255575	0.295153	0.409,0.536,0.122,0.379	1.0,0.581,0.368,0.675	-0.294	0.294
752	ENSMUSG00000047731.17	Wbp1l	chr19	+	46606711	46606759	46599113	46599293	46644352	46644455	752	194,98,226,179	314,151,394,83	158442238138	72258133111	197	149	0.0024333	0.0492931	0.318,0.329,0.303,0.62	0.624,0.564,0.575,0.485	-0.169	0.169
858	ENSMUSG00000025006.18	Sorbs1	chr19	-	40321792	40321960	40318021	40318068	40324746	40324832	858	68,33,55,62	27,73,43,40	74,43,61,63	35,18,21,7	298	149	0.0031567	0.0607347	0.557,0.184,0.39,0.437	0.514,0.544,0.592,0.818	-0.225	0.225
871	ENSMUSG00000025006.18	Sorbs1	chr19	-	40376644	40377016	40373475	40373617	40382520	40382633	871	33,23,10,14	19,27,22,21	15,2,10,10	48,49,37,30	298	149	3.59454e-06	0.000274823	0.465,0.299,0.185,0.25	0.135,0.02,0.119,0.143	0.196	0.196
895	ENSMUSG00000048720.8	Tbc1d12	chr19	+	38901308	38901415	38895986	38896069	38907771	38907852	895	13,16,8,44	1,0,0,0	8,6,22,22	3,4,2,0	256	149	6.39978e-05	0.00283569	0.883,1.0,1.0,1.0	0.608,0.466,0.865,1.0	0.236	0.236
922	ENSMUSG00000024811.11	Tnks2	chr19	+	36876184	36876373	36875263	36875373	36879234	36879487	922	70,98,70,146	23,22,23,29	151,110,92,109	25,15,25,7	298	149	0.0209698	0.256532	0.603,0.69,0.603,0.716	0.751,0.786,0.648,0.886	-0.115	0.115
928	ENSMUSG00000024805.16	Pcgf5	chr19	+	36450563	36450623	36444987	36445077	36455620	36455943	928	20,22,26,29	23,24,19,16	13,17,35,36	7,17,10,6	209	149	0.031353	0.342889	0.383,0.395,0.494,0.564	0.57,0.416,0.714,0.811	-0.169	0.169
1015	ENSMUSG00000037847.14	Nmrk1	chr19	+	18638917	18639399	18636078	18636142	18639517	18639608	1015	7,4,4,1	12,6,18,2	20,15,13,6	21,22,11,8	298	149	0.0177081	0.227079	0.226,0.25,0.1,0.2	0.323,0.254,0.371,0.273	-0.111	0.111
1086	ENSMUSG00000034820.4	Cpsf7	chr19	+	10532257	10532334	10531818	10531999	10532819	10532923	1086	3,0,12,14	23,32,44,26	4,4,13,18	14,16,10,6	226	149	0.00818344	0.126976	0.079,0.0,0.152,0.262	0.159,0.142,0.462,0.664	-0.234	0.234
1087	ENSMUSG00000034820.4	Cpsf7	chr19	+	10532260	10532334	10531826	10531999	10532819	10532923	1087	8,0,7,15	23,32,44,26	4,7,7,11	14,16,10,6	223	149	0.017853	0.228074	0.189,0.0,0.096,0.278	0.16,0.226,0.319,0.551	-0.173	0.173
1109	ENSMUSG00000036098.15	Myrf	chr19	-	10228652	10228916	10225448	10225510	10229019	10229107	1109	30,26,54,39	7,6,21,10	25,47,27,23	0,2,0,8	298	149	0.000338571	0.010532	0.682,0.684,0.563,0.661	1.0,0.922,1.0,0.59	-0.231	0.231
1113	ENSMUSG00000024660.9	Incenp	chr19	-	9877676	9877796	9876589	9876816	9878127	9878248	1113	11,22,50,11	0,0,0,8	5,20,5,1	0,0,0,0	269	149	0.0245092	0.287347	1.0,1.0,1.0,0.432	1.0,1.0,1.0,1.0	-0.142	0.142
1162	ENSMUSG00000024958.13	Gpr137	chr19	-	6939528	6939754	6939260	6939410	6940351	6940401	1162	42,27,46,44	18,7,11,20	36,50,29,29	15,34,40,13	298	149	0.0194247	0.242696	0.538,0.659,0.676,0.524	0.545,0.424,0.266,0.527	0.159	0.159
1242	ENSMUSG00000034108.6	Ccs	chr19	-	4833340	4833518	4825943	4826021	4838830	4838903	1242	1,7,3,2	0,8,0,0	1,12,4,1	0,0,0,0	298	149	0.0233643	0.27702	1.0,0.304,1.0,1.0	1.0,1.0,1.0,1.0	-0.174	0.174
1303	ENSMUSG00000024843.15	Chka	chr19	+	3881997	3882120	3864647	3864759	3884471	3884538	1303	18,15,5,21	21,33,10,36	0,7,8,2	22,30,7,16	272	149	0.00501875	0.0868615	0.32,0.199,0.215,0.242	0.0,0.113,0.385,0.064	0.103	0.103
1305	ENSMUSG00000024843.15	Chka	chr19	+	3882009	3882120	3864647	3864759	3884471	3884585	1305	17,15,5,20	21,33,10,36	0,7,8,2	22,30,7,16	260	149	0.00694624	0.111543	0.317,0.207,0.223,0.241	0.0,0.118,0.396,0.067	0.102	0.102
1450	ENSMUSG00000024589.18	Nedd4l	chr18	+	65167513	65167573	65165571	65165646	65172274	65172406	1450	97,108,55,158	15,17,14,9	164157138172	0,5,6,3	209	149	1.51146e-10	5.81753e-08	0.822,0.819,0.737,0.926	1.0,0.957,0.943,0.976	-0.143	0.143
1479	ENSMUSG00000024613.16	Tcof1	chr18	-	60832165	60832309	60831773	60831995	60832426	60832624	1479	32,13,24,12	0,1,0,0	16,28,9,23	0,0,5,4	293	149	0.000441953	0.0130551	1.0,0.869,1.0,1.0	1.0,1.0,0.478,0.745	0.161	0.161
1481	ENSMUSG00000024608.11	Rps14	chr18	+	60774509	60774686	60747148	60747221	60776400	60776551	1481	22,193,22,102	66,62,10,143	133,33,307,232	5,12,38,7	298	149	1.91141e-08	3.94332e-06	0.143,0.609,0.524,0.263	0.93,0.579,0.802,0.943	-0.429	0.429
1538	ENSMUSG00000024498.16	Tcerg1	chr18	+	42535084	42535147	42530629	42530890	42536177	42536289	1538	18,44,14,24	22,17,12,15	34,24,32,32	13,9,13,0	212	149	0.00737803	0.11752	0.365,0.645,0.451,0.529	0.648,0.652,0.634,1.0	-0.236	0.236
1623	ENSMUSG00000034300.17	Fam53c	chr18	+	34763072	34763130	34762494	34762724	34768167	34768952	1623	32,47,34,54	10,32,12,17	35,36,31,28	1,9,7,0	207	149	0.000178637	0.00637165	0.697,0.514,0.671,0.696	0.962,0.742,0.761,1.0	-0.222	0.222
1667	ENSMUSG00000033632.16	AW554918	chr18	+	25339713	25340384	25289938	25290066	25344863	25344962	1667	14,5,1,0	0,3,4,1	9,4,7,6	0,0,0,0	298	149	4.73734e-06	0.000336547	1.0,0.455,0.111,0.0	1.0,1.0,1.0,1.0	-0.609	0.609
1694	ENSMUSG00000034445.8	Cyb561a3	chr19	+	10578981	10579074	10577450	10577563	10580462	10580562	1694	9,7,3,11	2,2,1,3	18,5,13,16	0,0,2,1	242	149	0.000557384	0.0155225	0.735,0.683,0.649,0.693	1.0,1.0,0.8,0.908	-0.237	0.237
1719	ENSMUSG00000024410.15	Rmc1	chr18	+	12169232	12169309	12168716	12168902	12171548	12171633	1719	52,29,23,33	3,0,0,1	41,33,21,29	3,15,3,0	226	149	0.000104194	0.00416582	0.92,1.0,1.0,0.956	0.9,0.592,0.822,1.0	0.14	0.14
1830	ENSMUSG00000005371.15	Fbxo11	chr17	-	88014405	88014547	88012556	88012686	88015398	88015480	1830	47,53,43,63	4,10,0,0	42,18,31,36	0,0,0,0	291	149	1.35965e-05	0.000802351	0.857,0.731,1.0,1.0	1.0,1.0,1.0,1.0	-0.103	0.103
1831	ENSMUSG00000005371.15	Fbxo11	chr17	-	88014405	88014550	88012556	88012686	88015398	88015480	1831	44,57,74,84	4,10,0,0	62,27,52,40	0,0,0,0	294	149	2.2182e-05	0.00120427	0.848,0.743,1.0,1.0	1.0,1.0,1.0,1.0	-0.102	0.102
1849	ENSMUSG00000024127.15	Prepl	chr17	-	85088339	85088442	85083192	85083315	85090105	85090241	1849	11,15,10,13	6,2,1,0	16,4,18,13	2,8,17,2	252	149	0.0457434	0.457222	0.52,0.816,0.855,1.0	0.825,0.228,0.385,0.794	0.24	0.24
1850	ENSMUSG00000024127.15	Prepl	chr17	-	85088339	85088875	85083192	85083315	85090105	85090224	1850	32,46,35,47	6,2,1,0	36,31,66,47	2,8,17,2	298	149	0.010984	0.15949	0.727,0.92,0.946,1.0	0.9,0.66,0.66,0.922	0.113	0.113
1889	ENSMUSG00000036368.8	Rmdn2	chr17	+	79627461	79628379	79621769	79621772	79650301	79650305	1889	0,0,0,0	40,26,53,23	0,0,9,2	25,57,0,7	298	149	0.0146254	0.196325	0.0,0.0,0.0,0.0	0.0,0.0,1.0,0.125	-0.281	0.281
1945	ENSMUSG00000117038.1	Gm49880	chr17	-	74068400	74068504	74026997	74027141	74073742	74073942	1945	1,4,3,1	0,0,0,0	10,1,1,6	8,0,0,0	253	149	0.0114115	0.164587	1.0,1.0,1.0,1.0	0.424,1.0,1.0,1.0	0.144	0.144
2098	ENSMUSG00000032842.13	Abcc10	chr17	-	46310037	46310233	46306956	46307300	46310376	46310530	2098	20,35,30,11	2,1,4,0	24,40,31,13	0,0,0,0	298	149	0.0124712	0.174977	0.833,0.946,0.789,1.0	1.0,1.0,1.0,1.0	-0.108	0.108
2142	ENSMUSG00000061130.13	Ppm1b	chr17	+	85023031	85023079	85005508	85005566	85023695	85023779	2142	9,17,35,38	8,10,15,35	10,9,18,12	30,13,43,17	197	149	5.32507e-05	0.00246098	0.46,0.563,0.638,0.451	0.201,0.344,0.24,0.348	0.245	0.245
2167	ENSMUSG00000053835.17	H2-T24	chr17	-	36015383	36015656	36005694	36006789	36017240	36017537	2167	15,10,10,10	7,9,2,2	4,1,1,3	0,0,3,0	298	149	0.00379099	0.0694826	0.517,0.357,0.714,0.714	1.0,1.0,0.143,1.0	-0.21	0.21
2202	ENSMUSG00000061207.11	Stk19	chr17	-	34824513	34824661	34823992	34824324	34824750	34824848	2202	61,62,60,89	3,3,13,5	29,72,70,11	0,1,1,0	297	149	7.581e-07	8.28385e-05	0.911,0.912,0.698,0.899	1.0,0.973,0.972,1.0	-0.131	0.131
2255	ENSMUSG00000003929.11	Zfp81	chr17	-	33336721	33336848	33336454	33336509	33358733	33358878	2255	5,22,9,8	0,0,0,0	1,4,0,4	0,0,10,0	276	149	0.020037	0.248013	1.0,1.0,1.0,1.0	1.0,1.0,0.0,1.0	0.25	0.25
2283	ENSMUSG00000024050.18	Wiz	chr17	-	32381055	32381156	32367823	32368147	32387572	32387817	2283	1,1,0,0	0,2,5,2	2,1,5,5	1,0,1,0	250	149	1.08012e-09	3.39685e-07	1.0,0.23,0.0,0.0	0.544,1.0,0.749,1.0	-0.516	0.516
2284	ENSMUSG00000024050.18	Wiz	chr17	-	32381083	32381156	32367823	32368147	32387572	32387759	2284	2,2,1,5	0,2,5,2	4,7,13,6	1,0,1,0	222	149	4.72546e-06	0.000336547	1.0,0.402,0.118,0.627	0.729,1.0,0.897,1.0	-0.37	0.37
2387	ENSMUSG00000007570.16	Fance	chr17	+	28322645	28322771	28320789	28320856	28326151	28326566	2387	19,13,32,25	4,11,7,1	16,21,36,28	2,0,4,1	275	149	0.00374058	0.0687052	0.72,0.39,0.712,0.931	0.813,1.0,0.83,0.938	-0.207	0.207
2388	ENSMUSG00000007570.16	Fance	chr17	+	28323570	28323665	28322645	28322771	28326151	28326568	2388	0,0,3,0	9,5,17,9	3,2,5,5	3,9,17,7	244	149	3.32828e-05	0.0016731	0.0,0.0,0.097,0.0	0.379,0.119,0.152,0.304	-0.214	0.214
2422	ENSMUSG00000117819.1	Gm50253	chr17	+	27028832	27029946	27025336	27025459	27030675	27030800	2422	6,2,3,3	0,1,1,4	11,22,18,4	0,1,0,0	298	149	0.00100865	0.0247489	1.0,0.5,0.6,0.273	1.0,0.917,1.0,1.0	-0.386	0.386
2433	ENSMUSG00000048249.14	Crebrf	chr17	+	26736788	26736983	26715649	26715774	26757804	26757999	2433	12,8,8,2	6,0,4,5	9,9,8,7	1,0,0,0	298	149	2.68039e-07	3.58145e-05	0.5,1.0,0.5,0.167	0.818,1.0,1.0,1.0	-0.413	0.413
2440	ENSMUSG00000048249.14	Crebrf	chr17	+	26742041	26743131	26715649	26715774	26757804	26757999	2440	23,16,29,15	6,0,4,5	21,11,14,13	1,0,0,0	298	149	1.04372e-06	0.000107233	0.657,1.0,0.784,0.6	0.913,1.0,1.0,1.0	-0.218	0.218
2446	ENSMUSG00000024188.16	Luc7l	chr17	+	26253973	26254044	26252998	26253091	26255030	26255125	2446	27,35,32,19	21,15,26,23	6,22,6,5	43,35,28,26	220	149	7.99677e-08	1.30336e-05	0.465,0.612,0.455,0.359	0.086,0.299,0.127,0.115	0.316	0.316
2473	ENSMUSG00000037098.18	Rab11fip3	chr17	-	26011996	26012131	26008854	26008890	26013773	26013917	2473	2,2,1,11	7,11,16,5	10,10,6,4	6,8,11,1	284	149	0.0186129	0.234548	0.13,0.087,0.032,0.536	0.466,0.396,0.222,0.677	-0.244	0.244
2477	ENSMUSG00000004865.16	Srpk1	chr17	-	28600242	28600456	28599470	28599869	28600868	28600894	2477	60,69,27,73	0,1,0,0	55,39,44,28	0,5,2,3	298	149	0.000327749	0.0102697	1.0,0.972,1.0,1.0	1.0,0.796,0.917,0.824	0.109	0.109
2570	ENSMUSG00000071267.11	Zfp942	chr17	-	21941725	21941850	21932992	21933113	21953887	21954053	2570	31,13,6,32	2,3,2,1	18,5,16,14	1,0,0,0	274	149	0.0011203	0.0267751	0.894,0.702,0.62,0.946	0.907,1.0,1.0,1.0	-0.186	0.186
2598	ENSMUSG00000014767.17	Tbp	chr17	+	15501153	15501357	15499927	15500024	15502964	15503128	2598	12,24,13,22	2,19,5,6	4,3,9,10	3,12,5,12	298	149	0.00841491	0.129709	0.75,0.387,0.565,0.647	0.4,0.111,0.474,0.294	0.268	0.268
2599	ENSMUSG00000014767.17	Tbp	chr17	+	15501311	15501357	15499900	15500024	15502964	15503128	2599	9,10,6,8	2,19,5,6	3,2,5,2	3,12,5,12	195	149	0.0195907	0.244061	0.775,0.287,0.478,0.505	0.433,0.113,0.433,0.113	0.238	0.238
2664	ENSMUSG00000069135.11	Fgfr1op	chr17	+	8175518	8175578	8172927	8173008	8182227	8182454	2664	10,11,7,15	17,11,23,13	0,1,0,0	24,9,8,7	209	149	7.69707e-12	4.05086e-09	0.295,0.416,0.178,0.451	0.0,0.073,0.0,0.0	0.317	0.317
2706	ENSMUSG00000000386.16	Mx1	chr16	-	97452772	97452851	97451474	97451551	97454024	97454223	2706	1,4,1,4	0,2,2,2	3,2,2,6	0,0,0,0	228	149	0.000572337	0.0158193	1.0,0.567,0.246,0.567	1.0,1.0,1.0,1.0	-0.405	0.405
2800	ENSMUSG00000041079.12	Rwdd2b	chr16	-	87437063	87437131	87436572	87436935	87440436	87440573	2800	6,16,8,8	0,5,4,4	12,5,15,11	0,0,0,0	217	149	1.6089e-08	3.48659e-06	1.0,0.687,0.579,0.579	1.0,1.0,1.0,1.0	-0.289	0.289
2801	ENSMUSG00000041079.12	Rwdd2b	chr16	-	87437293	87437514	87436572	87436935	87440436	87440573	2801	28,35,12,36	0,5,4,4	25,14,54,26	0,0,0,0	298	149	4.99116e-07	5.93143e-05	1.0,0.778,0.6,0.818	1.0,1.0,1.0,1.0	-0.201	0.201
2807	ENSMUSG00000116993.1	Gm32461	chr16	-	86799007	86799134	86774877	86775022	86803972	86804072	2807	43,26,36,57	0,5,1,4	12,35,21,31	10,2,3,15	276	149	0.00114828	0.0273425	1.0,0.737,0.951,0.885	0.393,0.904,0.791,0.527	0.24	0.24
2831	ENSMUSG00000052516.19	Robo2	chr16	-	73906816	73906999	73904382	73904556	73916097	73916174	2831	1,16,1,0	9,0,1,11	0,0,0,0	4,4,2,2	298	149	0.00468553	0.0821417	0.053,1.0,0.333,0.0	0.0,0.0,0.0,0.0	0.346	0.346
2834	ENSMUSG00000022883.11	Robo1	chr16	+	72993666	72993693	72989598	72989796	72995116	72995159	2834	14,11,1,14	0,4,0,0	6,3,3,8	5,0,1,3	176	149	0.00182113	0.0386848	1.0,0.7,1.0,1.0	0.504,1.0,0.717,0.693	0.197	0.197
2850	ENSMUSG00000022911.11	Arl13b	chr16	-	62830742	62830813	62825604	62827413	62846684	62847040	2850	19,19,56,14	5,4,2,0	42,32,81,56	0,0,0,0	220	149	2.4006e-05	0.00128704	0.72,0.763,0.95,1.0	1.0,1.0,1.0,1.0	-0.142	0.142
2906	ENSMUSG00000035270.15	Impg2	chr16	+	56267061	56267250	56264962	56265173	56268216	56268424	2906	4,3,1,13	0,0,0,0	4,0,0,2	0,1,4,0	298	149	0.00627163	0.102753	1.0,1.0,1.0,1.0	1.0,0.0,0.0,1.0	0.5	0.5
2908	ENSMUSG00000052917.15	Senp7	chr16	+	56089383	56089464	56082355	56082408	56097339	56097431	2908	20,10,1,19	0,0,2,14	11,2,13,7	0,0,0,0	230	149	0.0013059	0.0302032	1.0,1.0,0.245,0.468	1.0,1.0,1.0,1.0	-0.322	0.322
2909	ENSMUSG00000052917.15	Senp7	chr16	+	56111605	56111803	56097339	56097431	56123778	56123936	2909	12,17,13,30	0,2,1,17	23,11,22,26	0,0,0,0	298	149	2.32532e-07	3.13955e-05	1.0,0.81,0.867,0.469	1.0,1.0,1.0,1.0	-0.214	0.214
2915	ENSMUSG00000052917.15	Senp7	chr16	+	56184760	56184829	56182467	56184190	56186058	56186209	2915	0,8,6,10	2,5,0,0	20,6,4,8	0,1,0,2	218	149	0.047054	0.467249	0.0,0.522,1.0,1.0	1.0,0.804,1.0,0.732	-0.254	0.254
2943	ENSMUSG00000055447.19	Cd47	chr16	+	49908053	49908078	49906780	49906812	49910873	49911091	2943	14,12,11,17	0,2,0,0	5,8,43,10	1,2,1,4	174	149	0.00415177	0.0745752	1.0,0.837,1.0,1.0	0.811,0.774,0.974,0.682	0.149	0.149
2944	ENSMUSG00000055447.19	Cd47	chr16	+	49908053	49908082	49906780	49906812	49910873	49911081	2944	13,12,11,13	0,2,0,0	5,8,39,10	1,2,1,4	178	149	0.00345435	0.0647389	1.0,0.834,1.0,1.0	0.807,0.77,0.97,0.677	0.153	0.153
2954	ENSMUSG00000033149.17	Phldb2	chr16	-	45827141	45827226	45825973	45826095	45844207	45844343	2954	3,7,9,1	8,23,1,13	1,0,0,0	7,16,11,4	234	149	4.94839e-06	0.000348659	0.193,0.162,0.851,0.047	0.083,0.0,0.0,0.0	0.292	0.292
2955	ENSMUSG00000033149.17	Phldb2	chr16	-	45827141	45827226	45825973	45826095	45860321	45860436	2955	1,4,10,1	2,10,2,2	1,0,0,0	13,23,11,8	234	149	8.50053e-08	1.35316e-05	0.241,0.203,0.761,0.241	0.047,0.0,0.0,0.0	0.35	0.35
2962	ENSMUSG00000033157.17	Abhd10	chr16	-	45740983	45741179	45740345	45740502	45742776	45742907	2962	0,0,3,0	27,22,18,11	0,9,2,2	7,14,15,2	298	149	0.000120322	0.00469418	0.0,0.0,0.077,0.0	0.0,0.243,0.063,0.333	-0.141	0.141
2968	ENSMUSG00000052013.15	Btla	chr16	+	45239043	45239364	45224314	45224461	45242705	45242741	2968	4,3,1,5	0,0,0,0	2,2,5,2	6,0,0,0	298	149	0.044047	0.444227	1.0,1.0,1.0,1.0	0.143,1.0,1.0,1.0	0.214	0.214
2975	ENSMUSG00000036208.13	Nepro	chr16	+	44727027	44727182	44724300	44724468	44729241	44729321	2975	52,56,66,32	8,8,0,3	20,31,19,31	0,0,0,0	298	149	2.24714e-07	3.0661e-05	0.765,0.778,1.0,0.842	1.0,1.0,1.0,1.0	-0.154	0.154
3021	ENSMUSG00000022837.14	Iqcb1	chr16	+	36851184	36851294	36849626	36849736	36856290	36856433	3021	4,17,30,11	2,6,0,1	19,15,22,25	0,0,0,0	259	149	0.000120116	0.00469418	0.535,0.62,1.0,0.864	1.0,1.0,1.0,1.0	-0.245	0.245
3097	ENSMUSG00000038084.16	Opa1	chr16	+	29588822	29588876	29588251	29588359	29589680	29589748	3097	33,48,30,72	58,137,76,108	98,64,87,48	76,58,146,121	203	149	0.0363633	0.384634	0.295,0.205,0.225,0.329	0.486,0.447,0.304,0.226	-0.102	0.102
3098	ENSMUSG00000038084.16	Opa1	chr16	+	29597585	29597696	29589680	29589748	29602211	29602265	3098	77,74,83,160	28,101,30,75	124122214150	74,3,69,54	260	149	0.0301187	0.332621	0.612,0.296,0.613,0.55	0.49,0.959,0.64,0.614	-0.158	0.158
3194	ENSMUSG00000033809.15	Alg3	chr16	-	20608485	20608646	20607763	20607884	20608741	20608889	3194	90,92,64,100	1,1,19,1	92,74,92,73	0,0,0,0	298	149	6.03132e-06	0.000410385	0.978,0.979,0.627,0.98	1.0,1.0,1.0,1.0	-0.109	0.109
3214	ENSMUSG00000062901.3	Klhl24	chr16	+	20101991	20102054	20097541	20097671	20106662	20106768	3214	25,26,26,29	7,9,1,13	18,52,51,69	1,5,0,1	212	149	7.04812e-07	7.83436e-05	0.715,0.67,0.948,0.611	0.927,0.88,1.0,0.98	-0.211	0.211
3243	ENSMUSG00000000325.16	Arvcf	chr16	+	18405101	18405221	18404459	18404545	18405606	18406747	3243	48,34,78,37	10,16,8,19	11,53,23,4	2,4,3,0	269	149	0.00440016	0.0782561	0.727,0.541,0.844,0.519	0.753,0.88,0.809,1.0	-0.203	0.203
3285	ENSMUSG00000022789.15	Dnm1l	chr16	-	16318444	16318477	16316601	16316778	16319451	16319508	3285	22,23,5,19	28,25,40,42	6,2,7,8	36,27,31,24	182	149	0.00375296	0.0688835	0.391,0.43,0.093,0.27	0.12,0.057,0.156,0.214	0.159	0.159
3291	ENSMUSG00000022789.15	Dnm1l	chr16	-	16342696	16342735	16340995	16341067	16345997	16346145	3291	1,8,13,0	1,5,4,1	0,1,2,0	6,7,1,3	188	149	0.000103881	0.00416183	0.442,0.559,0.72,0.0	0.0,0.102,0.613,0.0	0.252	0.252
3293	ENSMUSG00000022789.15	Dnm1l	chr16	-	16342696	16342735	16341421	16341468	16345997	16346145	3293	18,21,36,0	24,34,29,35	0,3,4,0	22,29,30,15	188	149	3.05497e-06	0.000242405	0.373,0.329,0.496,0.0	0.0,0.076,0.096,0.0	0.257	0.257
3302	ENSMUSG00000080717.10	B230307C23Rik	chr16	+	98010118	98010168	98008943	98009004	98015665	98015719	3302	1,0,0,4	2,9,9,7	4,1,2,1	0,0,2,1	199	149	6.42047e-06	0.000432301	0.272,0.0,0.0,0.3	1.0,1.0,0.428,0.428	-0.571	0.571
3339	ENSMUSG00000022681.15	Ntan1	chr16	+	13826882	13827125	13819343	13819436	13827387	13827493	3339	21,21,35,37	15,0,0,0	29,27,23,16	0,0,1,0	298	149	0.0086309	0.132327	0.412,1.0,1.0,1.0	1.0,1.0,0.92,1.0	-0.127	0.127
3340	ENSMUSG00000022681.15	Ntan1	chr16	+	13827059	13827125	13819298	13819436	13827387	13827496	3340	25,24,45,44	15,0,0,0	35,41,29,16	0,0,1,0	215	149	0.003572	0.0664608	0.536,1.0,1.0,1.0	1.0,1.0,0.953,1.0	-0.104	0.104
3368	ENSMUSG00000068663.14	Clec16a	chr16	+	10638786	10638915	10635245	10635296	10644760	10644881	3368	8,10,1,16	1,0,0,1	28,4,15,17	0,2,2,6	278	149	8.65758e-05	0.0036185	0.811,1.0,1.0,0.896	1.0,0.517,0.801,0.603	0.196	0.196
3403	ENSMUSG00000022515.6	Anks3	chr16	-	4947648	4947758	4947264	4947432	4948225	4948342	3403	34,16,31,11	2,0,10,0	16,21,13,12	0,0,0,0	259	149	1.75271e-05	0.000995571	0.907,1.0,0.641,1.0	1.0,1.0,1.0,1.0	-0.113	0.113
3469	ENSMUSG00000023044.2	Csad	chr15	-	102178780	102178832	102178390	102178616	102178960	102179160	3469	126,57,33,178	36,21,28,33	400602422309	24,48,48,22	201	149	4.58934e-09	1.20765e-06	0.722,0.668,0.466,0.8	0.925,0.903,0.867,0.912	-0.238	0.238
3485	ENSMUSG00000023044.2	Csad	chr15	-	102203136	102203260	102188886	102188962	102203695	102203716	3485	9,10,0,1	0,0,4,7	22,11,20,12	0,0,0,0	273	149	3.82656e-05	0.00188623	1.0,1.0,0.0,0.072	1.0,1.0,1.0,1.0	-0.482	0.482
3528	ENSMUSG00000023010.15	Tmbim6	chr15	+	99399656	99399871	99393694	99393730	99401579	99401663	3528	12,0,5,0	0,18,30,2	17,16,11,0	0,40,0,10	298	149	0.0267126	0.304403	1.0,0.0,0.077,0.0	1.0,0.167,1.0,0.0	-0.272	0.272
3533	ENSMUSG00000023008.18	Fmnl3	chr15	-	99318917	99319017	99317224	99318372	99319130	99319254	3533	17,15,5,10	3,2,1,4	10,10,9,2	0,1,0,0	249	149	2.05138e-06	0.00017943	0.772,0.818,0.749,0.599	1.0,0.857,1.0,1.0	-0.23	0.23
3551	ENSMUSG00000011960.12	Ccnt1	chr15	-	98546744	98546908	98546523	98546594	98548665	98548711	3551	48,34,29,27	5,1,13,3	43,27,38,39	0,0,2,0	298	149	2.94515e-07	3.77858e-05	0.828,0.944,0.527,0.818	1.0,1.0,0.905,1.0	-0.197	0.197
3587	ENSMUSG00000036167.16	Pphln1	chr15	+	93459671	93459791	93455450	93455530	93465104	93465245	3587	47,58,51,29	7,4,7,8	44,50,63,42	1,6,0,2	269	149	0.00105141	0.0254151	0.788,0.889,0.801,0.668	0.961,0.822,1.0,0.921	-0.139	0.139
3690	ENSMUSG00000058613.6	Cyp2d41-ps	chr15	-	82780534	82780687	82780292	82780453	82780976	82781148	3690	5,9,2,4	2,3,4,4	8,13,12,1	0,4,0,0	298	149	8.16011e-05	0.00346677	0.556,0.6,0.2,0.333	1.0,0.619,1.0,1.0	-0.482	0.482
3703	ENSMUSG00000118516.1	AC118710.1	chr15	-	82638574	82638763	82636749	82636998	82639264	82639441	3703	4,8,2,7	1,0,0,0	3,0,21,6	1,4,9,0	298	149	3.18049e-06	0.000249978	0.667,1.0,1.0,1.0	0.6,0.0,0.538,1.0	0.382	0.382
3729	ENSMUSG00000022474.15	Pmm1	chr15	-	81954371	81954450	81952724	81952800	81955648	81955748	3729	4,0,1,6	13,14,15,16	0,0,0,0	9,4,13,4	228	149	0.000153341	0.00566527	0.167,0.0,0.042,0.197	0.0,0.0,0.0,0.0	0.102	0.102
3758	ENSMUSG00000025060.15	Slk	chr19	+	47627647	47627740	47625304	47625484	47635468	47635598	3758	26,51,26,50	20,54,24,28	67,48,28,39	17,21,20,16	242	149	0.00591793	0.0982057	0.445,0.368,0.4,0.524	0.708,0.585,0.463,0.6	-0.155	0.155
3848	ENSMUSG00000033565.18	Rbfox2	chr15	-	77231386	77231437	77132716	77132941	77306363	77306605	3848	15,27,28,23	2,2,4,6	11,23,25,19	0,4,0,0	200	149	0.00154891	0.0343747	0.848,0.91,0.839,0.741	1.0,0.811,1.0,1.0	-0.118	0.118
3940	ENSMUSG00000072501.5	Phf20l1	chr15	+	66623760	66623883	66622760	66622817	66623991	66624099	3940	5,23,9,4	9,4,3,18	8,3,8,5	15,12,41,21	272	149	0.00525065	0.089667	0.233,0.759,0.622,0.109	0.226,0.12,0.097,0.115	0.291	0.291
4000	ENSMUSG00000022364.14	Tbc1d31	chr15	+	57919930	57920046	57915969	57916116	57922956	57923135	4000	7,5,6,27	5,6,1,8	13,2,11,12	0,1,0,0	265	149	7.49561e-08	1.23119e-05	0.44,0.319,0.771,0.655	1.0,0.529,1.0,1.0	-0.336	0.336
4071	ENSMUSG00000024943.9	Smc5	chr19	-	23215154	23215199	23214644	23214740	23218404	23218530	4071	7,18,15,7	7,21,15,21	13,17,10,17	6,0,3,1	194	149	5.57398e-07	6.41705e-05	0.434,0.397,0.434,0.204	0.625,1.0,0.719,0.929	-0.451	0.451
4083	ENSMUSG00000068284.14	Usf3	chr16	+	44198903	44199021	44173245	44173510	44200613	44200678	4083	23,55,43,25	11,4,9,0	83,32,53,24	0,3,0,0	267	149	7.7997e-07	8.41301e-05	0.538,0.885,0.727,1.0	1.0,0.856,1.0,1.0	-0.176	0.176
4084	ENSMUSG00000068284.14	Usf3	chr16	+	44198903	44199167	44173396	44173510	44200613	44200678	4084	11,19,27,9	11,4,9,0	34,14,23,14	0,3,0,0	298	149	7.35728e-06	0.000486486	0.333,0.704,0.6,1.0	1.0,0.7,1.0,1.0	-0.266	0.266
4087	ENSMUSG00000022235.15	Cmbl	chr15	+	31583964	31584072	31581839	31582037	31589683	31589770	4087	45,20,25,25	6,0,2,10	41,25,45,31	0,0,0,0	257	149	3.31832e-08	6.06899e-06	0.813,1.0,0.879,0.592	1.0,1.0,1.0,1.0	-0.179	0.179
4099	ENSMUSG00000022270.16	Retreg1	chr15	+	25941064	25941243	25940772	25940950	25964223	25964350	4099	112,54,328,44	21,0,45,0	51,180,92,85	30,50,0,31	298	149	0.0412095	0.424914	0.727,1.0,0.785,1.0	0.459,0.643,1.0,0.578	0.208	0.208
4100	ENSMUSG00000022270.16	Retreg1	chr15	+	25941125	25941243	25940886	25940950	25964223	25964350	4100	95,35,274,26	21,0,45,0	47,134,77,49	30,50,0,31	267	149	0.049457	0.484205	0.716,1.0,0.773,1.0	0.466,0.599,1.0,0.469	0.239	0.239
4103	ENSMUSG00000022412.14	Mief1	chr15	+	80234681	80234780	80234079	80234181	80235804	80236040	4103	12,5,23,5	0,0,6,2	18,6,20,20	13,5,6,2	248	149	0.0381934	0.399566	1.0,1.0,0.697,0.6	0.454,0.419,0.667,0.857	0.225	0.225
4133	ENSMUSG00000039458.15	Mtmr12	chr15	+	12236017	12236120	12233853	12233926	12237928	12238019	4133	20,29,17,10	3,0,4,0	13,27,13,6	0,0,0,0	252	149	0.0141593	0.192382	0.798,1.0,0.715,1.0	1.0,1.0,1.0,1.0	-0.122	0.122
4134	ENSMUSG00000039458.15	Mtmr12	chr15	+	12236017	12236148	12233853	12233926	12237928	12238019	4134	35,28,12,9	3,0,4,0	22,46,14,12	0,0,0,0	280	149	0.0141862	0.192645	0.861,1.0,0.615,1.0	1.0,1.0,1.0,1.0	-0.131	0.131
4140	ENSMUSG00000022201.16	Zfr	chr15	+	12135266	12135290	12118238	12118338	12136395	12136678	4140	7,0,13,6	89,45,74,33	7,19,12,5	30,43,50,22	173	149	0.000372543	0.0113694	0.063,0.0,0.131,0.135	0.167,0.276,0.171,0.164	-0.112	0.112
4205	ENSMUSG00000052712.17	BC004004	chr17	+	29277856	29277947	29268787	29269002	29294006	29294016	4205	31,32,42,13	2,6,10,3	20,7,38,38	0,0,4,2	240	149	0.00175949	0.0377171	0.906,0.768,0.723,0.729	1.0,1.0,0.855,0.922	-0.163	0.163
4209	ENSMUSG00000052712.17	BC004004	chr17	+	29282059	29282267	29268824	29269002	29294006	29294161	4209	23,29,34,20	2,6,10,3	9,17,35,13	0,0,4,2	298	149	0.0247284	0.288709	0.852,0.707,0.63,0.769	1.0,1.0,0.814,0.765	-0.155	0.155
4219	ENSMUSG00000023951.17	Vegfa	chr17	-	46022276	46022348	46018857	46018879	46024064	46024094	4219	4,14,5,7	38,37,35,32	17,12,37,31	33,37,39,26	221	149	2.74671e-05	0.00143594	0.066,0.203,0.088,0.129	0.258,0.179,0.39,0.446	-0.197	0.197
4271	ENSMUSG00000022139.17	Mbnl2	chr14	+	120404637	120404732	120396450	120396604	120428934	120429626	4271	67,87,63,108	11,23,5,33	57,15,45,25	22,5,15,19	244	149	0.00782016	0.122445	0.788,0.698,0.885,0.667	0.613,0.647,0.647,0.446	0.171	0.171
4284	ENSMUSG00000019143.15	Hars2	chr18	+	36789366	36789609	36789156	36789284	36790133	36790250	4284	74,57,23,74	12,9,2,2	52,55,79,56	0,0,4,0	298	149	7.10769e-07	7.86666e-05	0.755,0.76,0.852,0.949	1.0,1.0,0.908,1.0	-0.148	0.148
4303	ENSMUSG00000033004.16	Mycbp2	chr14	-	103169856	103170012	103155123	103156767	103172566	103172689	4303	9,8,14,17	14,28,15,8	9,0,7,1	14,6,18,22	298	149	0.00615037	0.101346	0.243,0.125,0.318,0.515	0.243,0.0,0.163,0.022	0.193	0.193
4324	ENSMUSG00000022064.10	Pibf1	chr14	+	99221558	99221643	99210939	99211070	99242838	99243009	4324	8,7,12,9	0,0,2,0	16,1,15,21	2,4,0,0	234	149	0.0311571	0.341325	1.0,1.0,0.793,1.0	0.836,0.137,1.0,1.0	0.205	0.205
4356	ENSMUSG00000022020.15	Naa16	chr14	-	79359455	79359528	79356366	79356536	79369077	79369184	4356	22,12,21,24	1,9,4,2	16,24,18,12	0,0,4,0	222	149	0.00106323	0.0256488	0.937,0.472,0.779,0.89	1.0,1.0,0.751,1.0	-0.168	0.168
4357	ENSMUSG00000022016.16	Akap11	chr14	-	78502938	78503022	78502189	78502236	78507724	78507880	4357	15,12,24,27	13,4,17,18	26,17,29,13	0,10,4,10	233	149	0.0304821	0.335784	0.425,0.657,0.474,0.49	1.0,0.521,0.823,0.454	-0.188	0.188
4471	ENSMUSG00000031109.16	Enox2	chrX	-	49168640	49168784	49080616	49080751	49286855	49286904	4471	24,4,14,7	4,2,0,9	18,10,24,6	0,0,1,0	293	149	7.52568e-07	8.25839e-05	0.753,0.504,1.0,0.283	1.0,1.0,0.924,1.0	-0.346	0.346
4507	ENSMUSG00000024350.6	Dnajc18	chr18	-	35702411	35702595	35700803	35700990	35703025	35703112	4507	6,1,6,9	0,4,5,1	10,2,2,4	9,10,3,6	298	149	0.0422363	0.432047	1.0,0.111,0.375,0.818	0.357,0.091,0.25,0.25	0.339	0.339
4561	ENSMUSG00000091649.3	Phf11b	chr14	-	59338620	59338742	59331189	59331297	59341272	59341351	4561	2,2,0,5	2,0,1,6	6,2,2,4	0,1,0,2	271	149	0.000309942	0.00980709	0.355,1.0,0.0,0.314	1.0,0.524,1.0,0.524	-0.345	0.345
4656	ENSMUSG00000022185.19	Acin1	chr14	-	54678742	54678862	54667072	54667161	54679240	54679352	4656	8,10,22,17	38,41,28,71	13,31,56,14	34,34,53,35	269	149	0.00624191	0.102406	0.104,0.119,0.303,0.117	0.175,0.336,0.369,0.181	-0.104	0.104
4669	ENSMUSG00000044501.17	Zfp758	chr17	+	22371990	22372088	22361452	22361707	22373642	22373769	4669	2,4,7,0	7,3,3,7	1,0,1,5	0,1,0,2	247	149	0.00430706	0.0767592	0.147,0.446,0.585,0.0	1.0,0.0,1.0,0.601	-0.356	0.356
4691	ENSMUSG00000022160.18	Mettl3	chr14	-	52296515	52296581	52295506	52296186	52296663	52296752	4691	20,16,8,16	0,0,8,0	22,34,13,10	0,0,0,0	215	149	0.0281901	0.316485	1.0,1.0,0.409,1.0	1.0,1.0,1.0,1.0	-0.148	0.148
4693	ENSMUSG00000022160.18	Mettl3	chr14	-	52298639	52298736	52298024	52298085	52299700	52299819	4693	7,17,7,13	2,2,12,7	21,10,3,12	2,3,1,1	246	149	0.0173836	0.224144	0.679,0.837,0.261,0.529	0.864,0.669,0.645,0.879	-0.188	0.188
4694	ENSMUSG00000022160.18	Mettl3	chr14	-	52298639	52298815	52297868	52298085	52299700	52299819	4694	36,41,22,44	2,2,12,7	46,29,29,35	2,3,1,1	298	149	0.00663405	0.107327	0.9,0.911,0.478,0.759	0.92,0.829,0.935,0.946	-0.146	0.146
4711	ENSMUSG00000049295.17	Zfp219	chr14	-	52020190	52020374	52009637	52009662	52020522	52020686	4711	5,9,21,1	18,4,18,3	2,8,3,0	4,18,24,16	298	149	0.00301419	0.0583996	0.122,0.529,0.368,0.143	0.2,0.182,0.059,0.0	0.18	0.18
4712	ENSMUSG00000049295.17	Zfp219	chr14	-	52020190	52020374	52009969	52010058	52020522	52020686	4712	5,5,17,3	18,2,7,0	2,6,3,2	11,32,2,9	298	149	0.00538359	0.0910374	0.122,0.556,0.548,1.0	0.083,0.086,0.429,0.1	0.382	0.382
4756	ENSMUSG00000006281.8	Tep1	chr14	-	50833913	50834077	50833453	50833567	50835991	50836204	4756	23,20,15,11	1,5,0,3	30,28,17,20	2,0,0,0	298	149	7.50541e-05	0.00325293	0.92,0.667,1.0,0.647	0.882,1.0,1.0,1.0	-0.162	0.162
4820	ENSMUSG00000037697.19	Ddhd1	chr14	-	45599101	45599185	45588466	45595664	45601564	45601756	4820	53,65,40,75	7,30,6,11	45,34,41,27	16,9,18,35	233	149	0.0118131	0.16823	0.829,0.581,0.81,0.813	0.643,0.707,0.593,0.33	0.19	0.19
4954	ENSMUSG00000021902.7	Phf7	chr14	-	31238336	31238482	31237688	31238153	31239630	31239737	4954	13,36,13,13	0,6,2,2	9,30,21,14	0,0,0,3	295	149	0.000509796	0.0144787	1.0,0.752,0.767,0.767	1.0,1.0,1.0,0.702	-0.104	0.104
4960	ENSMUSG00000042323.17	Pbrm1	chr14	+	31022719	31022859	31019137	31019293	31023066	31023179	4960	6,8,7,3	0,3,4,3	10,13,6,9	0,0,0,0	289	149	4.61247e-08	8.03693e-06	1.0,0.579,0.474,0.34	1.0,1.0,1.0,1.0	-0.402	0.402
4967	ENSMUSG00000042323.17	Pbrm1	chr14	+	31045329	31045425	31044623	31044709	31046331	31046423	4967	13,24,24,31	14,38,25,36	17,11,19,9	23,33,48,22	245	149	0.00839361	0.129536	0.361,0.278,0.369,0.344	0.31,0.169,0.194,0.199	0.12	0.12
4974	ENSMUSG00000042323.17	Pbrm1	chr14	+	31110414	31110579	31107108	31107310	31117012	31117083	4974	5,7,15,0	7,5,5,11	3,12,2,2	2,0,4,0	298	149	0.0336019	0.361203	0.263,0.412,0.6,0.0	0.429,1.0,0.2,1.0	-0.339	0.339
4978	ENSMUSG00000021916.16	Glt8d1	chr14	+	31004694	31004790	31001675	31001997	31006458	31006512	4978	1,0,1,0	12,31,3,7	7,2,1,4	19,4,2,5	245	149	1.59551e-06	0.000146423	0.048,0.0,0.169,0.0	0.183,0.233,0.233,0.327	-0.19	0.19
4979	ENSMUSG00000021916.16	Glt8d1	chr14	+	31004717	31004790	31001460	31001997	31006458	31006512	4979	0,1,0,0	12,31,3,7	7,0,1,6	19,4,2,5	222	149	1.26465e-06	0.000122604	0.0,0.021,0.0,0.0	0.198,0.0,0.251,0.446	-0.218	0.218
4986	ENSMUSG00000021918.10	Nek4	chr14	+	30974214	30974358	30970162	30970564	30975222	30975372	4986	13,25,4,18	21,10,9,5	1,6,10,0	24,20,14,19	293	149	6.07383e-05	0.00273354	0.239,0.56,0.184,0.647	0.021,0.132,0.266,0.0	0.303	0.303
5026	ENSMUSG00000046753.10	Ccdc66	chr14	-	27483807	27483932	27481089	27482602	27484064	27484318	5026	14,13,6,10	0,0,4,2	32,32,16,19	0,0,0,3	274	149	0.0407959	0.422	1.0,1.0,0.449,0.731	1.0,1.0,1.0,0.775	-0.149	0.149
5234	ENSMUSG00000033111.16	3830406C13Rik	chr14	+	12299721	12299782	12297581	12297656	12301147	12301733	5234	3,10,12,0	45,28,13,50	9,19,33,32	46,19,68,39	210	149	0.00328539	0.0624346	0.045,0.202,0.396,0.0	0.122,0.415,0.256,0.368	-0.13	0.13
5277	ENSMUSG00000021782.14	Dlg5	chr14	-	24191147	24191291	24190317	24190501	24192791	24192954	5277	5,12,21,8	4,1,0,1	3,9,3,4	0,0,1,0	293	149	0.0178074	0.227786	0.389,0.859,1.0,0.803	1.0,1.0,0.604,1.0	-0.138	0.138
5280	ENSMUSG00000024045.6	Akap8	chr17	-	32313104	32313262	32312285	32312373	32314110	32314144	5280	7,0,9,0	44,29,25,15	3,13,3,8	8,24,6,7	298	149	0.000163262	0.00592151	0.074,0.0,0.153,0.0	0.158,0.213,0.2,0.364	-0.177	0.177
5339	ENSMUSG00000047789.5	Slc38a9	chr13	+	112684061	112684146	112669586	112669731	112686065	112686198	5339	6,5,8,14	21,16,3,22	2,1,5,0	8,8,8,20	234	149	0.0069282	0.111387	0.154,0.166,0.629,0.288	0.137,0.074,0.285,0.0	0.185	0.185
5425	ENSMUSG00000069089.8	Cdk7	chr13	-	100716500	100716619	100711496	100711596	100719301	100719370	5425	32,30,34,45	2,2,7,0	44,20,38,15	0,0,1,0	268	149	9.83238e-05	0.00401198	0.899,0.893,0.73,1.0	1.0,1.0,0.955,1.0	-0.108	0.108
5442	ENSMUSG00000021962.9	Dcp1a	chr14	+	30512983	30513097	30505545	30505684	30518918	30519470	5442	23,20,9,11	0,4,1,0	5,3,7,1	6,0,4,0	263	149	0.0181643	0.230418	1.0,0.739,0.836,1.0	0.321,1.0,0.498,1.0	0.189	0.189
5501	ENSMUSG00000007617.18	Homer1	chr13	+	93386344	93386380	93355939	93356079	93387523	93387680	5501	0,0,0,0	3,7,15,4	0,5,0,1	10,0,3,3	185	149	0.0491254	0.481691	0.0,0.0,0.0,0.0	0.0,1.0,0.0,0.212	-0.303	0.303
5503	ENSMUSG00000021621.15	Zcchc9	chr13	-	91798822	91798891	91796532	91797254	91800610	91800703	5503	27,47,39,44	5,4,4,1	35,22,36,36	0,0,1,0	218	149	1.11511e-05	0.000679823	0.787,0.889,0.87,0.968	1.0,1.0,0.961,1.0	-0.112	0.112
5646	ENSMUSG00000021514.18	Zfp369	chr13	+	65284920	65285016	65280261	65280388	65291822	65292305	5646	10,28,11,13	2,0,1,4	12,17,31,11	0,0,0,0	245	149	0.00517333	0.0886642	0.753,1.0,0.87,0.664	1.0,1.0,1.0,1.0	-0.178	0.178
5659	ENSMUSG00000033102.15	Cdc14b	chr13	-	64205270	64205417	64201331	64201448	64209106	64209182	5659	21,19,32,23	5,0,0,2	49,17,41,47	0,0,0,1	296	149	0.0174979	0.225167	0.679,1.0,1.0,0.853	1.0,1.0,1.0,0.959	-0.107	0.107
5674	ENSMUSG00000022858.16	Tra2b	chr16	-	22258985	22259261	22254983	22255117	22265740	22265900	5674	68,46,74,35	188,74,123,92	65,55,51,58	50,160,94,32	298	149	0.0374835	0.393577	0.153,0.237,0.231,0.16	0.394,0.147,0.213,0.475	-0.112	0.112
5768	ENSMUSG00000021495.10	Fam193b	chr13	-	55564519	55564580	55555982	55556225	55569704	55571120	5768	18,34,20,50	1,2,0,9	38,35,40,44	21,20,18,9	210	149	2.75714e-06	0.000222888	0.927,0.923,1.0,0.798	0.562,0.554,0.612,0.776	0.286	0.286
5795	ENSMUSG00000021457.14	Syk	chr13	+	52596957	52597054	52583436	52583605	52610795	52611252	5795	8,18,1,1	2,5,0,8	0,1,3,0	1,7,0,5	246	149	0.00467177	0.082012	0.708,0.686,1.0,0.07	0.0,0.08,1.0,0.0	0.346	0.346
5873	ENSMUSG00000037965.14	Zc3h7a	chr16	-	11151865	11151930	11151138	11151325	11153058	11153263	5873	9,22,30,56	3,5,5,3	59,35,51,41	5,0,2,0	214	149	0.0012861	0.0298792	0.676,0.754,0.807,0.929	0.891,1.0,0.947,1.0	-0.168	0.168
6010	ENSMUSG00000046351.11	Zfp322a	chr13	-	23362579	23362654	23357031	23357713	23362802	23362875	6010	0,2,0,28	22,11,5,11	9,8,1,1	6,2,3,4	224	149	0.0421059	0.431226	0.0,0.108,0.0,0.629	0.499,0.727,0.181,0.143	-0.203	0.203
6031	ENSMUSG00000022556.11	Hsf1	chr15	+	76498153	76498290	76497767	76497915	76498421	76498691	6031	42,49,10,14	3,9,12,0	19,19,23,49	1,3,2,1	286	149	0.0327695	0.353711	0.879,0.739,0.303,1.0	0.908,0.767,0.857,0.962	-0.143	0.143
6043	ENSMUSG00000063894.15	Zkscan8	chr13	-	21522223	21522315	21513221	21520962	21525137	21525306	6043	4,7,11,9	3,4,0,0	10,11,7,5	0,0,0,0	241	149	0.00144858	0.0327109	0.452,0.52,1.0,1.0	1.0,1.0,1.0,1.0	-0.257	0.257
6059	ENSMUSG00000041324.14	Inhba	chr13	+	16014450	16014532	16012199	16012386	16017181	16017683	6059	2,1,0,0	0,0,3,5	1,9,6,0	0,0,0,1	231	149	8.08222e-05	0.00345073	1.0,1.0,0.0,0.0	1.0,1.0,1.0,0.0	-0.25	0.25
6069	ENSMUSG00000021302.10	Ggps1	chr13	-	14057795	14057888	14055149	14055220	14063205	14063386	6069	24,27,19,29	0,3,2,5	25,19,12,12	0,1,0,0	242	149	0.000173227	0.00623095	1.0,0.847,0.854,0.781	1.0,0.921,1.0,1.0	-0.11	0.11
6090	ENSMUSG00000019726.12	Lyst	chr13	+	13686832	13686988	13684090	13684101	13687618	13687629	6090	17,23,26,43	3,1,5,0	71,34,37,32	0,0,0,0	298	149	0.000265392	0.00870269	0.739,0.92,0.722,1.0	1.0,1.0,1.0,1.0	-0.155	0.155
6121	ENSMUSG00000021311.9	Mtr	chr13	-	12247318	12247425	12244554	12244617	12247892	12247985	6121	11,17,10,18	0,0,0,8	4,10,17,4	0,0,0,0	256	149	0.00744547	0.118229	1.0,1.0,1.0,0.567	1.0,1.0,1.0,1.0	-0.108	0.108
6134	ENSMUSG00000021156.17	Zmynd11	chr13	-	9710145	9710307	9698627	9698705	9720772	9720928	6134	77,77,61,77	42,27,45,54	100,69,85,63	24,14,34,15	298	149	0.00040935	0.0122891	0.478,0.588,0.404,0.416	0.676,0.711,0.556,0.677	-0.184	0.184
6217	ENSMUSG00000109841.2	E330011O21Rik	chr16	-	78253436	78253467	78251508	78251888	78253612	78253718	6217	8,5,6,10	20,6,11,14	9,13,4,4	0,12,2,0	180	149	0.000459328	0.0134147	0.249,0.408,0.311,0.372	1.0,0.473,0.623,1.0	-0.439	0.439
6219	ENSMUSG00000109841.2	E330011O21Rik	chr16	-	78253436	78253496	78251432	78251888	78253612	78253718	6219	7,13,6,23	20,6,11,14	8,4,6,11	0,12,2,0	209	149	0.0157693	0.208151	0.2,0.607,0.28,0.539	1.0,0.192,0.681,1.0	-0.312	0.312
6273	ENSMUSG00000021285.15	Ppp1r13b	chr12	-	111837001	111837106	111835612	111835776	111838600	111838781	6273	29,13,12,42	22,22,10,10	15,11,11,20	3,1,10,3	254	149	0.0345715	0.369163	0.436,0.257,0.413,0.711	0.746,0.866,0.392,0.796	-0.246	0.246
6283	ENSMUSG00000021288.19	Klc1	chr12	+	111793648	111793699	111789324	111789486	111795547	111795678	6283	3,1,2,1	3,17,7,10	1,4,9,2	8,8,5,0	200	149	0.0382611	0.400059	0.427,0.042,0.176,0.069	0.085,0.271,0.573,1.0	-0.304	0.304
6284	ENSMUSG00000021288.19	Klc1	chr12	+	111795547	111795678	111789324	111789459	111806007	111806074	6284	22,20,1,24	9,2,0,1	17,7,12,13	0,0,0,2	280	149	9.8505e-05	0.00401303	0.565,0.842,1.0,0.927	1.0,1.0,1.0,0.776	-0.11	0.11
6287	ENSMUSG00000021288.19	Klc1	chr12	+	111800343	111800410	111795179	111795678	111806007	111806074	6287	2,4,7,4	19,19,0,21	1,3,1,0	16,5,13,12	216	149	0.0124168	0.174498	0.068,0.127,1.0,0.116	0.041,0.293,0.05,0.0	0.232	0.232
6299	ENSMUSG00000007411.16	Mark3	chr12	+	111651957	111651984	111647470	111647728	111653389	111653434	6299	7,31,0,8	11,1,16,0	3,0,3,12	16,19,10,12	176	149	0.0139524	0.18997	0.35,0.963,0.0,1.0	0.137,0.0,0.203,0.458	0.379	0.379
6300	ENSMUSG00000007411.16	Mark3	chr12	+	111653389	111653434	111647470	111647728	111655269	111655615	6300	12,8,27,7	83,63,58,130	18,26,23,12	66,40,74,37	194	149	0.00134484	0.0308	0.1,0.089,0.263,0.04	0.173,0.333,0.193,0.199	-0.102	0.102
6310	ENSMUSG00000021271.5	Zfp839	chr12	+	110866239	110866368	110864855	110865005	110866707	110866825	6310	11,26,5,12	9,12,12,2	23,26,13,10	3,4,4,1	278	149	0.002968	0.0577215	0.396,0.537,0.183,0.763	0.804,0.777,0.635,0.843	-0.295	0.295
6409	ENSMUSG00000090555.1	Gm8893	chr12	-	103818848	103818999	103817855	103818047	103819884	103820155	6409	77,128,70,110	5,15,12,9	95136164118	0,13,0,3	298	149	2.67577e-05	0.00140822	0.885,0.81,0.745,0.859	1.0,0.84,1.0,0.952	-0.123	0.123
6420	ENSMUSG00000064215.13	Ifi27	chr12	+	103437389	103437524	103436562	103436682	103437675	103437705	6420	261194178256	140,85,94,102	136,163,72,80	127,92,50,73	284	149	0.000342056	0.0106074	0.494,0.545,0.498,0.568	0.36,0.482,0.43,0.365	0.117	0.117
6442	ENSMUSG00000021188.14	Trip11	chr12	-	101905754	101905813	101902231	101902342	101912689	101913123	6442	6,5,8,8	8,2,0,2	19,19,15,11	0,0,0,0	208	149	2.76598e-07	3.62077e-05	0.349,0.642,1.0,0.741	1.0,1.0,1.0,1.0	-0.317	0.317
6443	ENSMUSG00000021188.14	Trip11	chr12	-	101905754	101905816	101902231	101902342	101912689	101913140	6443	14,24,17,21	8,2,0,2	17,21,25,10	0,0,0,0	211	149	5.35447e-06	0.000369201	0.553,0.894,1.0,0.881	1.0,1.0,1.0,1.0	-0.168	0.168
6562	ENSMUSG00000034157.12	Cipc	chr12	+	86959727	86959828	86952743	86952931	86960271	86960391	6562	10,1,33,30	30,36,37,57	32,13,36,12	42,26,29,25	250	149	0.0372923	0.392048	0.166,0.016,0.347,0.239	0.312,0.23,0.425,0.222	-0.105	0.105
6614	ENSMUSG00000021240.6	Abcd4	chr12	-	84606099	84606308	84605347	84605384	84608569	84608659	6614	10,16,38,4	0,0,1,0	28,26,26,38	0,4,7,0	298	149	6.4146e-05	0.00283739	1.0,1.0,0.95,1.0	1.0,0.765,0.65,1.0	0.134	0.134
6646	ENSMUSG00000019969.14	Psen1	chr12	+	83699354	83699421	83688151	83688293	83699600	83699651	6646	7,4,10,0	1,0,0,5	1,5,1,8	0,0,0,0	216	149	0.0277812	0.312984	0.828,1.0,1.0,0.0	1.0,1.0,1.0,1.0	-0.293	0.293
6660	ENSMUSG00000015143.15	Actn1	chr12	-	80170182	80170248	80168857	80169016	80170685	80170766	6660	4,1,6,0	36,27,29,23	0,5,6,8	26,22,9,11	215	149	0.0105512	0.155128	0.071,0.025,0.125,0.0	0.0,0.136,0.316,0.335	-0.142	0.142
6664	ENSMUSG00000066440.5	Zfyve26	chr12	-	79257414	79257578	79255229	79255366	79260800	79260899	6664	22,32,29,44	0,6,4,2	77,43,86,39	0,0,1,0	298	149	2.5455e-06	0.000209209	1.0,0.727,0.784,0.917	1.0,1.0,0.977,1.0	-0.137	0.137
6718	ENSMUSG00000044712.15	Slc38a6	chr12	+	73293698	73293799	73292159	73292233	73310144	73310197	6718	0,0,0,0	11,17,9,14	0,4,7,12	12,3,4,10	250	149	1.2218e-09	3.79612e-07	0.0,0.0,0.0,0.0	0.0,0.443,0.511,0.417	-0.343	0.343
6736	ENSMUSG00000019718.8	L3hypdh	chr12	-	72079486	72079656	72076495	72077486	72084530	72085018	6736	36,12,13,33	0,0,0,0	43,34,38,27	0,2,4,4	298	149	0.000130219	0.00500458	1.0,1.0,1.0,1.0	1.0,0.895,0.826,0.771	0.127	0.127
6853	ENSMUSG00000035021.13	Baz1a	chr12	-	54923384	54923480	54923039	54923264	54927563	54927624	6853	26,31,21,7	0,0,0,0	8,11,29,10	0,0,5,2	245	149	0.0103751	0.152887	1.0,1.0,1.0,1.0	1.0,1.0,0.779,0.753	0.117	0.117
6866	ENSMUSG00000033819.16	Ppp1r16a	chr15	+	76689327	76689494	76671646	76671762	76690171	76691152	6866	15,5,9,9	0,1,8,7	10,14,8,14	17,21,19,3	298	149	0.0376866	0.395237	1.0,0.714,0.36,0.391	0.227,0.25,0.174,0.7	0.278	0.278
6935	ENSMUSG00000024858.14	Grk2	chr19	-	4289897	4290020	4289672	4289739	4290073	4290168	6935	59,68,112,70	4,5,12,5	52,40,33,43	0,0,0,0	272	149	1.242e-08	2.83439e-06	0.89,0.882,0.836,0.885	1.0,1.0,1.0,1.0	-0.127	0.127
6944	ENSMUSG00000021144.14	Mta1	chr12	+	113133540	113133576	113133184	113133337	113135796	113135828	6944	63,36,47,74	33,55,25,28	70,67,68,52	13,14,15,6	185	149	5.714e-06	0.000392941	0.606,0.345,0.602,0.68	0.813,0.794,0.785,0.875	-0.258	0.258
6952	ENSMUSG00000020564.17	Atxn7l1	chr12	+	33148432	33148501	33147710	33147915	33217711	33217816	6952	15,17,15,29	3,4,9,0	10,0,4,4	5,2,7,5	218	149	0.000901396	0.0227193	0.774,0.744,0.533,1.0	0.578,0.0,0.281,0.353	0.46	0.46
7052	ENSMUSG00000069755.5	Zfp125	chr12	-	20915747	20915791	20914758	20914841	20920841	20921262	7052	10,0,8,6	1,2,1,4	10,6,7,5	0,0,1,0	193	149	0.000294096	0.00939794	0.885,0.0,0.861,0.537	1.0,1.0,0.844,1.0	-0.39	0.39
7059	ENSMUSG00000021843.17	Ktn1	chr14	+	47704419	47704488	47704186	47704277	47705762	47705800	7059	21,33,22,19	13,13,20,8	18,17,10,7	23,11,35,10	218	149	0.00413707	0.0743981	0.525,0.634,0.429,0.619	0.348,0.514,0.163,0.324	0.214	0.214
7061	ENSMUSG00000021843.17	Ktn1	chr14	+	47716873	47716960	47714631	47714722	47720195	47720285	7061	6,44,21,20	21,34,15,29	26,6,62,39	11,9,28,25	236	149	0.0418077	0.428754	0.153,0.45,0.469,0.303	0.599,0.296,0.583,0.496	-0.15	0.15
7079	ENSMUSG00000057469.8	E2f6	chr12	+	16812248	16812372	16811163	16811315	16813846	16813912	7079	0,4,4,0	9,3,2,15	1,0,0,0	1,12,13,5	273	149	0.00749476	0.118651	0.0,0.421,0.522,0.0	0.353,0.0,0.0,0.0	0.148	0.148
7107	ENSMUSG00000020608.7	Smc6	chr12	+	11276259	11276365	11273993	11274111	11279604	11279727	7107	48,81,47,81	0,5,2,4	60,27,28,31	4,4,11,11	255	149	1.87632e-05	0.00105648	1.0,0.904,0.932,0.922	0.898,0.798,0.598,0.622	0.211	0.211
7157	ENSMUSG00000051721.6	Wdcp	chr12	+	4848862	4849113	4843393	4843451	4850126	4851767	7157	2,5,2,0	2,0,0,2	1,11,2,8	0,0,0,0	298	149	0.0295455	0.328131	0.333,1.0,1.0,0.0	1.0,1.0,1.0,1.0	-0.417	0.417
7195	ENSMUSG00000037486.18	Asxl2	chr12	+	3455546	3455640	3451661	3451770	3457061	3457209	7195	1,1,2,8	11,18,2,9	2,0,3,0	6,20,10,8	243	149	0.0184119	0.232862	0.053,0.033,0.38,0.353	0.17,0.0,0.155,0.0	0.123	0.123
7214	ENSMUSG00000046605.14	B3gntl1	chr11	-	121651608	121651673	121644526	121644592	121670869	121670969	7214	4,6,6,2	0,0,1,0	4,1,6,1	2,0,2,5	214	149	2.26043e-06	0.000193661	1.0,1.0,0.807,1.0	0.582,1.0,0.676,0.122	0.357	0.357
7215	ENSMUSG00000024068.8	Spast	chr17	+	74359253	74359349	74356085	74356169	74367247	74367435	7215	55,81,64,110	16,9,4,7	87,74,87,108	4,3,4,0	245	149	5.34944e-05	0.00246705	0.676,0.846,0.907,0.905	0.93,0.938,0.93,1.0	-0.116	0.116
7239	ENSMUSG00000025144.17	Cenpx	chr11	-	120712439	120712539	120711843	120711895	120713692	120713732	7239	11,11,4,4	0,0,0,15	1,4,7,4	3,0,43,11	249	149	0.00067153	0.0179641	1.0,1.0,1.0,0.138	0.166,1.0,0.089,0.179	0.426	0.426
7240	ENSMUSG00000025144.17	Cenpx	chr11	-	120712439	120712712	120711843	120711895	120713692	120713732	7240	17,14,9,5	0,0,0,15	4,7,13,9	3,0,43,11	298	149	0.00263342	0.0523194	1.0,1.0,1.0,0.143	0.4,1.0,0.131,0.29	0.33	0.33
7244	ENSMUSG00000042988.10	Notum	chr11	-	120658330	120658391	120657492	120657595	120658649	120658745	7244	22,13,11,8	5,0,4,0	16,20,21,14	0,0,0,0	210	149	0.000185133	0.00655389	0.757,1.0,0.661,1.0	1.0,1.0,1.0,1.0	-0.145	0.145
7271	ENSMUSG00000060147.15	Serpinb6a	chr13	-	33935568	33935794	33931471	33931646	33935921	33935955	7271	9,40,23,30	118,203,60,123	11,16,7,10	6,35,50,20	298	149	0.0253363	0.293518	0.037,0.09,0.161,0.109	0.478,0.186,0.065,0.2	-0.133	0.133
7272	ENSMUSG00000060147.15	Serpinb6a	chr13	-	33935572	33935794	33931471	33931646	33935921	33935977	7272	9,42,21,35	118,203,60,123	9,20,9,7	6,35,50,20	298	149	0.0316296	0.344452	0.037,0.094,0.149,0.125	0.429,0.222,0.083,0.149	-0.119	0.119
7273	ENSMUSG00000060147.15	Serpinb6a	chr13	-	33935618	33935794	33931471	33931646	33935921	33935954	7273	9,28,20,26	118,203,60,123	11,13,6,6	6,35,50,20	298	149	0.0416172	0.42792	0.037,0.065,0.143,0.096	0.478,0.157,0.057,0.13	-0.12	0.12
7274	ENSMUSG00000060147.15	Serpinb6a	chr13	-	33935626	33935794	33931471	33931646	33935921	33935996	7274	3,26,18,25	118,203,60,123	11,15,8,7	6,35,50,20	298	149	0.00321001	0.061372	0.013,0.06,0.13,0.092	0.478,0.176,0.074,0.149	-0.145	0.145
7302	ENSMUSG00000025372.16	Baiap2	chr11	+	120003037	120003085	120000551	120000586	120006358	120006782	7302	42,41,95,36	39,30,21,18	50,94,95,70	14,30,24,23	197	149	0.0252412	0.292548	0.449,0.508,0.774,0.602	0.73,0.703,0.75,0.697	-0.137	0.137
7303	ENSMUSG00000025371.12	Chmp6	chr11	+	119915412	119915522	119913809	119913937	119915631	119915719	7303	76,34,99,24	0,0,0,0	20,85,30,15	5,0,4,0	259	149	0.00202011	0.0421819	1.0,1.0,1.0,1.0	0.697,1.0,0.812,1.0	0.123	0.123
7304	ENSMUSG00000025371.12	Chmp6	chr11	+	119915412	119915554	119913829	119913937	119915631	119915719	7304	27,4,38,3	0,0,0,0	2,31,0,1	5,0,4,0	291	149	8.27671e-05	0.0034994	1.0,1.0,1.0,1.0	0.17,1.0,0.0,1.0	0.458	0.458
7340	ENSMUSG00000056962.11	Jmjd6	chr11	-	116839837	116839926	116838989	116839128	116840409	116840545	7340	6,7,1,4	50,18,51,18	6,2,12,8	17,46,9,14	238	149	0.015114	0.201948	0.07,0.196,0.012,0.122	0.181,0.026,0.455,0.263	-0.131	0.131
7341	ENSMUSG00000056962.11	Jmjd6	chr11	-	116839837	116839926	116838989	116839128	116840447	116840545	7341	6,12,1,6	0,0,3,0	6,2,16,17	5,4,4,0	238	149	0.00474108	0.0829069	1.0,1.0,0.173,1.0	0.429,0.238,0.715,1.0	0.198	0.198
7342	ENSMUSG00000056962.11	Jmjd6	chr11	-	116839837	116839931	116838989	116839128	116840409	116840545	7342	6,9,1,4	50,18,51,18	6,8,13,12	17,46,9,14	243	149	0.00155695	0.0344936	0.069,0.235,0.012,0.12	0.178,0.096,0.47,0.345	-0.163	0.163
7343	ENSMUSG00000056962.11	Jmjd6	chr11	-	116839837	116839931	116838989	116839128	116840447	116840545	7343	7,9,1,4	0,0,3,0	8,5,12,9	5,4,4,0	243	149	0.00416119	0.0746755	1.0,1.0,0.17,1.0	0.495,0.434,0.648,1.0	0.148	0.148
7406	ENSMUSG00000020752.11	Recql5	chr11	-	115904884	115905042	115897040	115897259	115916978	115917058	7406	0,0,0,0	16,11,21,18	7,3,1,0	8,25,10,26	298	149	0.00165196	0.0361636	0.0,0.0,0.0,0.0	0.304,0.057,0.048,0.0	-0.102	0.102
7505	ENSMUSG00000020721.16	Helz	chr11	+	107555518	107555575	107549345	107549401	107574937	107575165	7505	1,6,2,0	1,4,8,1	7,10,5,4	0,0,0,1	206	149	4.14798e-10	1.46532e-07	0.42,0.52,0.153,0.0	1.0,1.0,1.0,0.743	-0.662	0.662
7521	ENSMUSG00000018363.16	Smurf2	chr11	-	106875900	106875939	106871501	106871610	106920180	106920261	7521	19,20,38,38	1,1,8,11	30,27,34,27	1,0,2,1	188	149	2.60875e-05	0.0013814	0.938,0.941,0.79,0.732	0.96,1.0,0.931,0.955	-0.111	0.111
7530	ENSMUSG00000040528.15	Milr1	chr11	+	106761182	106761296	106754781	106755051	106763855	106763948	7530	14,19,6,9	2,0,7,1	5,10,2,2	0,1,0,1	263	149	0.00144177	0.0325857	0.799,1.0,0.327,0.836	1.0,0.85,1.0,0.531	-0.105	0.105
7531	ENSMUSG00000040528.15	Milr1	chr11	+	106761185	106761296	106754781	106755051	106763855	106763948	7531	6,11,2,3	2,0,7,1	4,8,1,1	0,1,0,1	260	149	0.000469538	0.013605	0.632,1.0,0.141,0.632	1.0,0.821,1.0,0.364	-0.195	0.195
7535	ENSMUSG00000020717.19	Pecam1	chr11	-	106662001	106662024	106654217	106655162	106679548	106679611	7535	1,10,9,3	29,46,18,53	19,2,7,6	21,21,19,20	172	149	0.0279635	0.314517	0.029,0.158,0.302,0.047	0.439,0.076,0.242,0.206	-0.107	0.107
7584	ENSMUSG00000018412.16	Kansl1	chr11	-	104368679	104368778	104357480	104357596	104378684	104378826	7584	35,39,17,39	17,44,34,53	20,34,36,27	12,22,12,19	248	149	0.0160821	0.210949	0.553,0.347,0.231,0.307	0.5,0.481,0.643,0.461	-0.162	0.162
7587	ENSMUSG00000018412.16	Kansl1	chr11	-	104426423	104426468	104424936	104425293	104441724	104442291	7587	7,11,6,9	5,5,12,11	1,3,3,0	15,23,18,15	194	149	2.60634e-08	5.01222e-06	0.518,0.628,0.277,0.386	0.049,0.091,0.113,0.0	0.389	0.389
7588	ENSMUSG00000018412.16	Kansl1	chr11	-	104426423	104426468	104424936	104425293	104467638	104467991	7588	8,3,9,4	15,20,2,6	1,0,2,0	6,4,6,6	194	149	5.80223e-05	0.00263429	0.291,0.103,0.776,0.339	0.113,0.0,0.204,0.0	0.298	0.298
7638	ENSMUSG00000017309.11	Cd300lg	chr11	+	102046066	102046198	102042971	102043304	102046853	102047187	7638	10,6,14,17	7,7,11,3	8,2,11,17	2,0,1,6	281	149	0.029597	0.328561	0.431,0.312,0.403,0.75	0.68,1.0,0.854,0.6	-0.31	0.31
7736	ENSMUSG00000068246.6	Apol9b	chr15	+	77733625	77733796	77729147	77729246	77734464	77734590	7736	11,9,23,17	5,0,0,23	23,9,18,16	51,18,3,32	298	149	0.00665031	0.107522	0.524,1.0,1.0,0.27	0.184,0.2,0.75,0.2	0.365	0.365
7893	ENSMUSG00000037458.15	Azin1	chr15	-	38507186	38507346	38501403	38501600	38514472	38514609	7893	43,46,43,51	62,54,51,117	32,29,29,20	100,88,138,112	298	149	7.26581e-09	1.78448e-06	0.257,0.299,0.297,0.179	0.138,0.141,0.095,0.082	0.144	0.144
7894	ENSMUSG00000037458.15	Azin1	chr15	-	38517816	38517958	38514471	38514609	38518096	38518221	7894	10,0,2,0	10,3,11,1	0,0,0,0	6,14,20,10	291	149	2.90691e-05	0.00150832	0.339,0.0,0.085,0.0	0.0,0.0,0.0,0.0	0.106	0.106
7952	ENSMUSG00000020516.15	Rps6kb1	chr11	-	86517349	86517392	86513982	86516191	86517582	86517640	7952	0,0,3,7	36,9,21,5	0,1,0,0	33,30,13,6	192	149	0.00329839	0.0625433	0.0,0.0,0.1,0.521	0.0,0.025,0.0,0.0	0.149	0.149
7974	ENSMUSG00000018651.14	Tada2a	chr11	-	84106188	84106346	84104191	84104280	84109953	84110045	7974	7,20,8,20	2,0,6,1	26,26,22,11	0,2,0,1	298	149	0.00158484	0.0350213	0.636,1.0,0.4,0.909	1.0,0.867,1.0,0.846	-0.192	0.192
8032	ENSMUSG00000017686.17	Rhot1	chr11	+	80255861	80255957	80254659	80254862	80257513	80257636	8032	26,32,26,22	17,10,20,7	34,31,32,34	15,2,4,12	245	149	0.0273275	0.30936	0.482,0.661,0.442,0.657	0.58,0.904,0.83,0.633	-0.176	0.176
8060	ENSMUSG00000017677.11	Wsb1	chr11	-	79243399	79243575	79241983	79242156	79244462	79244563	8060	10,11,21,0	15,32,16,14	14,21,11,24	14,9,8,12	298	149	0.000949719	0.0235494	0.25,0.147,0.396,0.0	0.333,0.538,0.407,0.5	-0.246	0.246
8090	ENSMUSG00000061981.14	Flot2	chr11	+	78053362	78053453	78049477	78049559	78055756	78055880	8090	5,7,8,15	8,0,0,0	10,7,3,7	0,0,0,0	240	149	0.0340008	0.364428	0.28,1.0,1.0,1.0	1.0,1.0,1.0,1.0	-0.18	0.18
8114	ENSMUSG00000000631.20	Myo18a	chr11	+	77854677	77854722	77853751	77853891	77857722	77857845	8114	51,74,55,34	44,25,15,31	26,62,17,26	29,60,36,34	194	149	0.00169993	0.0368695	0.471,0.695,0.738,0.457	0.408,0.442,0.266,0.37	0.219	0.219
8218	ENSMUSG00000069825.12	Gm49340	chr11	+	73336009	73336070	73333297	73333426	73336194	73336290	8218	11,8,3,20	6,6,0,1	12,13,27,34	0,0,2,0	210	149	7.58079e-06	0.000498708	0.565,0.486,1.0,0.934	1.0,1.0,0.905,1.0	-0.23	0.23
8225	ENSMUSG00000005949.9	Ctns	chr11	-	73197098	73197252	73196637	73196717	73198917	73198995	8225	15,16,8,18	6,20,8,8	5,11,2,11	10,13,22,27	298	149	0.000519643	0.0146775	0.556,0.286,0.333,0.529	0.2,0.297,0.043,0.169	0.249	0.249
8256	ENSMUSG00000040483.15	Xaf1	chr11	+	72306563	72306652	72303326	72303462	72308606	72308749	8256	18,21,25,51	4,9,2,5	27,2,15,11	10,2,6,6	238	149	0.0234901	0.278215	0.738,0.594,0.887,0.865	0.628,0.385,0.61,0.534	0.232	0.232
8295	ENSMUSG00000020821.17	Kif1c	chr11	+	70702431	70702551	70700649	70700709	70702771	70702905	8295	125182111190	51,52,51,122	175207325300	80,95,55,24	269	149	0.0233617	0.27702	0.576,0.66,0.547,0.463	0.548,0.547,0.766,0.874	-0.122	0.122
8296	ENSMUSG00000020821.17	Kif1c	chr11	+	70702445	70702551	70700547	70700709	70702771	70702905	8296	111162118173	51,52,51,122	165207316314	80,95,55,24	255	149	0.0132496	0.183207	0.56,0.645,0.575,0.453	0.547,0.56,0.77,0.884	-0.132	0.132
8304	ENSMUSG00000057054.11	Inca1	chr11	-	70695863	70695948	70690438	70690552	70699987	70700155	8304	140,62,121,97	15,14,37,6	121,95,143,140	0,0,3,3	234	149	5.21805e-15	4.80582e-12	0.856,0.738,0.676,0.911	1.0,1.0,0.968,0.967	-0.189	0.189
8318	ENSMUSG00000020828.13	Pld2	chr11	+	70540844	70540954	70540305	70540614	70541062	70541183	8318	8,18,4,4	4,2,0,0	9,24,11,7	0,0,0,0	259	149	0.0232972	0.276605	0.535,0.838,1.0,1.0	1.0,1.0,1.0,1.0	-0.157	0.157
8360	ENSMUSG00000047284.14	Neurl4	chr11	+	69903653	69903719	69903007	69903452	69903864	69904163	8360	11,2,5,8	4,4,3,0	10,24,23,23	2,0,1,0	215	149	1.66989e-05	0.000957818	0.656,0.257,0.536,1.0	0.776,1.0,0.941,1.0	-0.317	0.317
8361	ENSMUSG00000047284.14	Neurl4	chr11	+	69903676	69903719	69903007	69903452	69903864	69903914	8361	3,0,4,3	4,4,3,0	0,9,9,9	2,0,1,0	192	149	0.00220778	0.0455838	0.368,0.0,0.509,1.0	0.0,1.0,0.875,1.0	-0.249	0.249
8364	ENSMUSG00000047284.14	Neurl4	chr11	+	69907263	69907340	69906983	69907182	69907423	69907502	8364	16,6,18,47	3,2,0,3	21,16,33,17	0,0,0,0	226	149	0.00320441	0.0613694	0.779,0.664,1.0,0.912	1.0,1.0,1.0,1.0	-0.161	0.161
8512	ENSMUSG00000054519.8	Zfp867	chr11	-	59465011	59465072	59461196	59464286	59465450	59465577	8512	7,15,18,9	1,2,2,2	10,7,9,10	0,1,0,0	210	149	0.000787518	0.0204311	0.832,0.842,0.865,0.761	1.0,0.832,1.0,1.0	-0.133	0.133
8539	ENSMUSG00000037275.14	Gemin5	chr11	-	58139494	58139608	58139018	58139141	58141587	58141809	8539	18,25,24,34	1,7,9,10	24,26,20,36	1,0,8,1	263	149	0.00938156	0.140911	0.911,0.669,0.602,0.658	0.931,1.0,0.586,0.953	-0.157	0.157
8562	ENSMUSG00000020400.17	Tnip1	chr11	-	54940710	54940882	54939597	54939735	54955847	54956047	8562	11,12,2,17	1,1,0,4	11,7,6,2	0,0,0,0	298	149	0.0145979	0.196068	0.846,0.857,1.0,0.68	1.0,1.0,1.0,1.0	-0.154	0.154
8641	ENSMUSG00000020385.16	Clk4	chr11	+	51270536	51270595	51263149	51263269	51271799	51272019	8641	9,12,20,16	0,0,3,5	17,2,7,9	0,0,0,0	208	149	0.00163958	0.0359537	1.0,1.0,0.827,0.696	1.0,1.0,1.0,1.0	-0.119	0.119
8653	ENSMUSG00000020946.13	Gosr2	chr11	-	103683791	103683932	103676848	103679397	103686581	103686714	8653	284298264254	38,30,58,16	215218169163	20,10,5,5	290	149	2.56805e-05	0.00136546	0.793,0.836,0.7,0.891	0.847,0.918,0.946,0.944	-0.109	0.109
8673	ENSMUSG00000020376.17	Rnf130	chr11	+	50095775	50095980	50087378	50087461	50104548	50104758	8673	3,13,10,57	7,0,0,0	28,15,53,36	0,0,0,0	298	149	0.0363363	0.384506	0.176,1.0,1.0,1.0	1.0,1.0,1.0,1.0	-0.206	0.206
8686	ENSMUSG00000020346.16	Mgat1	chr11	+	49251549	49251674	49245192	49245617	49260570	49260691	8686	113,89,78,66	0,23,24,2	67,133,77,78	0,15,0,0	274	149	0.0060968	0.100591	1.0,0.678,0.639,0.947	1.0,0.828,1.0,1.0	-0.141	0.141
8733	ENSMUSG00000006169.20	Clint1	chr11	+	45902210	45902285	45895059	45895129	45906180	45906467	8733	191225115363	43,52,77,25	193208342263	16,25,26,14	224	149	0.000126614	0.00491734	0.747,0.742,0.498,0.906	0.889,0.847,0.897,0.926	-0.167	0.167
8765	ENSMUSG00000020271.17	Fbxw11	chr11	+	32708187	32708250	32652747	32652904	32711771	32711997	8765	11,13,19,19	11,0,14,25	11,3,24,16	0,4,0,7	212	149	0.0470052	0.467118	0.413,1.0,0.488,0.348	1.0,0.345,1.0,0.616	-0.178	0.178
8780	ENSMUSG00000020289.15	Nprl3	chr11	-	32259216	32259255	32255438	32255568	32263024	32263094	8780	20,9,13,10	10,11,6,10	15,43,19,28	14,7,0,1	188	149	0.00134401	0.0308	0.613,0.393,0.632,0.442	0.459,0.83,1.0,0.957	-0.291	0.291
8794	ENSMUSG00000020460.15	Rps27a	chr11	-	29547205	29547260	29546702	29546788	29547680	29547745	8794	2424,1986,16,2119	0,2,6,0	2,7,26,6	0,7,1,4	204	149	3.41073e-05	0.00170788	1.0,0.999,0.661,1.0	1.0,0.422,0.95,0.523	0.191	0.191
8878	ENSMUSG00000020173.17	Cobl	chr11	-	12365104	12365179	12343743	12343917	12369593	12369640	8878	7,16,30,10	10,7,0,1	29,20,31,22	0,0,6,0	224	149	0.0107031	0.156646	0.318,0.603,1.0,0.869	1.0,1.0,0.775,1.0	-0.246	0.246
8952	ENSMUSG00000083844.8	Ube2d-ps	chr11	+	5782184	5782357	5780205	5780635	5783891	5784710	8952	3,6,10,2	0,0,0,0	7,7,2,6	9,1,0,1	298	149	9.67576e-06	0.000604161	1.0,1.0,1.0,1.0	0.28,0.778,1.0,0.75	0.298	0.298
8989	ENSMUSG00000034354.17	Mtmr3	chr11	-	4546188	4546268	4531221	4531305	4594602	4594863	8989	0,0,4,0	36,23,50,30	6,2,7,14	17,31,26,12	229	149	2.06414e-08	4.19134e-06	0.0,0.0,0.049,0.0	0.187,0.04,0.149,0.432	-0.19	0.19
8997	ENSMUSG00000051427.14	Ccdc157	chr11	-	4158159	4158289	4152908	4153056	4160158	4160218	8997	0,0,1,0	3,5,2,11	8,6,2,1	15,3,14,7	279	149	1.14315e-05	0.000693639	0.0,0.0,0.211,0.0	0.222,0.516,0.071,0.071	-0.167	0.167
9029	ENSMUSG00000034377.10	Tulp4	chr17	+	6124170	6124248	6121827	6122344	6124656	6124710	9029	5,20,15,5	8,2,0,1	4,4,15,16	0,1,0,1	227	149	0.000681818	0.0181364	0.291,0.868,1.0,0.766	1.0,0.724,1.0,0.913	-0.178	0.178
9034	ENSMUSG00000020454.17	Eif4enif1	chr11	+	3233987	3234059	3229868	3230101	3234461	3234645	9034	24,15,33,35	38,60,62,44	21,12,25,27	13,18,22,38	221	149	0.0239971	0.282703	0.299,0.144,0.264,0.349	0.521,0.31,0.434,0.324	-0.133	0.133
9109	ENSMUSG00000025357.8	Dgka	chr10	-	128731323	128731412	128731067	128731187	128732982	128733097	9109	24,17,17,34	0,0,0,0	38,30,32,17	4,0,8,0	238	149	1.17622e-05	0.000707047	1.0,1.0,1.0,1.0	0.856,1.0,0.715,1.0	0.107	0.107
9113	ENSMUSG00000025358.16	Cdk2	chr10	-	128699975	128700119	128699471	128699675	128701342	128701444	9113	14,18,17,45	10,8,14,19	35,17,19,15	5,6,6,6	293	149	0.0262333	0.300535	0.416,0.534,0.382,0.546	0.781,0.59,0.617,0.56	-0.168	0.168
9129	ENSMUSG00000039810.11	Zc3h10	chr10	-	128547170	128547244	128546827	128546891	128547693	128547725	9129	3,7,6,4	3,3,3,0	4,5,7,1	0,0,2,0	223	149	1.63909e-05	0.000947732	0.401,0.609,0.572,1.0	1.0,1.0,0.7,1.0	-0.28	0.28
9155	ENSMUSG00000040054.17	Baz2a	chr10	+	128092459	128092850	128091576	128091776	128096438	128096523	9155	0,4,3,1	4,16,4,19	4,3,4,9	11,1,6,4	298	149	0.00142452	0.0322808	0.0,0.111,0.273,0.026	0.154,0.6,0.25,0.529	-0.281	0.281
9156	ENSMUSG00000040054.17	Baz2a	chr10	+	128096379	128096523	128091634	128091776	128108893	128109031	9156	12,15,8,6	2,6,0,0	7,3,12,18	0,0,0,0	293	149	0.000376789	0.0114511	0.753,0.56,1.0,1.0	1.0,1.0,1.0,1.0	-0.172	0.172
9157	ENSMUSG00000040054.17	Baz2a	chr10	+	128096438	128096523	128091612	128091776	128108893	128109031	9157	13,25,11,21	2,6,0,0	15,4,9,10	0,0,0,0	234	149	0.00237253	0.0482895	0.805,0.726,1.0,1.0	1.0,1.0,1.0,1.0	-0.117	0.117
9234	ENSMUSG00000034613.12	Ppm1h	chr10	+	122782182	122782345	122678761	122679430	122802234	122802579	9234	26,38,5,18	0,0,0,0	3,5,12,8	6,0,0,0	298	149	0.0468885	0.466137	1.0,1.0,1.0,1.0	0.2,1.0,1.0,1.0	0.2	0.2
9240	ENSMUSG00000036916.13	Zfp280c	chrX	-	48543584	48543703	48543404	48543441	48547264	48547327	9240	19,26,17,33	5,3,7,6	17,12,29,9	2,0,3,1	268	149	0.0088004	0.134287	0.679,0.828,0.575,0.754	0.825,1.0,0.843,0.833	-0.166	0.166
9324	ENSMUSG00000020166.15	Cnot2	chr10	-	116527826	116527949	116517316	116517383	116549032	116549105	9324	77,93,87,90	11,9,6,11	60,97,95,93	2,2,2,2	272	149	1.38605e-06	0.000133303	0.793,0.85,0.888,0.818	0.943,0.964,0.963,0.962	-0.121	0.121
9348	ENSMUSG00000020189.15	Osbpl8	chr10	+	111224671	111224708	111204734	111204840	111233552	111233690	9348	19,9,40,11	9,6,5,7	31,7,11,14	20,11,22,17	186	149	0.00176243	0.0377488	0.628,0.546,0.865,0.557	0.554,0.338,0.286,0.397	0.255	0.255
9456	ENSMUSG00000024349.10	Tmem173	chr18	-	35739924	35740014	35739350	35739577	35740306	35740462	9456	20,31,21,21	1,4,1,2	26,3,10,6	0,0,0,0	239	149	0.00193244	0.0408138	0.926,0.829,0.929,0.867	1.0,1.0,1.0,1.0	-0.112	0.112
9492	ENSMUSG00000020530.14	Ggnbp2	chr11	-	84854254	84854380	84854053	84854167	84858439	84858538	9492	36,45,36,26	91101122136	5,7,11,10	148,88,86,113	275	149	3.3118e-13	2.5119e-10	0.177,0.194,0.138,0.094	0.018,0.041,0.065,0.046	0.108	0.108
9599	ENSMUSG00000035620.15	Ric8b	chr10	+	84947411	84948020	84925545	84925593	84958015	84958110	9599	35,35,40,38	0,0,0,0	44,20,37,39	3,3,3,0	298	149	0.000711542	0.0186666	1.0,1.0,1.0,1.0	0.88,0.769,0.86,1.0	0.123	0.123
9615	ENSMUSG00000052595.8	A1cf	chr19	+	31944963	31945100	31934627	31934833	31947358	31948573	9615	116216126300	23,14,13,32	230223338222	4,36,0,0	286	149	2.17745e-06	0.000187173	0.724,0.889,0.835,0.83	0.968,0.763,1.0,1.0	-0.113	0.113
9616	ENSMUSG00000052595.8	A1cf	chr19	+	31945785	31945937	31934627	31934833	31947358	31948573	9616	118,140,74,282	23,14,13,32	175165284182	4,36,0,0	298	149	3.19287e-06	0.000249978	0.72,0.833,0.74,0.815	0.956,0.696,1.0,1.0	-0.136	0.136
9648	ENSMUSG00000020250.10	Txnrd1	chr10	+	82872937	82873275	82859258	82859300	82874612	82874735	9648	0,9,16,1	26,17,25,9	0,0,0,0	23,25,12,6	298	149	3.07498e-08	5.7462e-06	0.0,0.209,0.242,0.053	0.0,0.0,0.0,0.0	0.126	0.126
9727	ENSMUSG00000113949.1	Scamp4	chr10	+	80603238	80603313	80602923	80602949	80608802	80608850	9727	3,0,0,0	16,9,15,4	3,0,0,5	0,23,6,7	224	149	0.0260658	0.299281	0.111,0.0,0.0,0.0	1.0,0.0,0.0,0.322	-0.303	0.303
9770	ENSMUSG00000035673.10	Sbno2	chr10	-	80079952	80081382	80070620	80072518	80082614	80082726	9770	19,15,8,10	24,33,35,52	0,2,2,1	45,35,75,26	298	149	5.85643e-13	4.08177e-10	0.284,0.185,0.103,0.088	0.0,0.028,0.013,0.019	0.15	0.15
9800	ENSMUSG00000035863.14	Palm	chr10	+	79816791	79816923	79815184	79815241	79819040	79819511	9800	20,20,8,0	2,3,4,5	5,4,10,1	0,7,0,0	281	149	0.0252278	0.292524	0.841,0.779,0.515,0.0	1.0,0.233,1.0,1.0	-0.274	0.274
9931	ENSMUSG00000033434.15	Gtpbp6	chr5	-	110106652	110106697	110106265	110106336	110107059	110107176	9931	11,6,8,7	1,0,9,0	2,5,7,2	0,0,0,0	194	149	0.00156492	0.0346107	0.894,1.0,0.406,1.0	1.0,1.0,1.0,1.0	-0.175	0.175
9948	ENSMUSG00000024155.8	Meiob	chr17	+	24836435	24836522	24834991	24835175	24839426	24839787	9948	8,9,3,7	11,6,7,11	12,15,23,19	1,3,2,9	236	149	7.51565e-06	0.000495687	0.315,0.486,0.213,0.287	0.883,0.759,0.879,0.571	-0.448	0.448
9983	ENSMUSG00000049606.16	Zfp644	chr5	-	106634830	106635436	106619539	106619642	106635609	106636323	9983	29,37,28,28	0,0,6,7	28,34,43,40	2,0,0,0	298	149	3.83274e-05	0.00188623	1.0,1.0,0.7,0.667	0.875,1.0,1.0,1.0	-0.127	0.127
9984	ENSMUSG00000049606.16	Zfp644	chr5	-	106635609	106638635	106619539	106619642	106666784	106666845	9984	7,5,16,23	3,6,8,3	14,1,20,1	0,0,4,0	298	149	0.000428816	0.0127694	0.538,0.294,0.5,0.793	1.0,1.0,0.714,1.0	-0.397	0.397
10070	ENSMUSG00000022401.12	Xpnpep3	chr15	+	81415846	81415994	81414431	81414548	81427275	81427538	10070	4,5,0,0	26,15,12,33	4,4,10,6	25,19,10,19	297	149	0.00225022	0.0461643	0.072,0.143,0.0,0.0	0.074,0.096,0.334,0.137	-0.107	0.107
10100	ENSMUSG00000015605.6	Srf	chr17	-	46549844	46550036	46549435	46549512	46550900	46551020	10100	79,81,84,60	2,1,6,4	42,57,75,44	5,7,6,9	298	149	0.00111886	0.0267655	0.952,0.976,0.875,0.882	0.808,0.803,0.862,0.71	0.125	0.125
10108	ENSMUSG00000032952.11	Ap4b1	chr3	+	103812084	103812309	103809599	103810057	103812776	103812907	10108	65,57,74,66	8,7,7,12	61,43,44,55	5,1,6,0	298	149	0.00954651	0.142799	0.802,0.803,0.841,0.733	0.859,0.956,0.786,1.0	-0.106	0.106
10130	ENSMUSG00000029413.14	Naaa	chr5	-	92276918	92277077	92272443	92272570	92277911	92278165	10130	25,11,18,23	2,0,5,0	26,11,6,9	1,0,0,0	298	149	0.00872421	0.13344	0.862,1.0,0.643,1.0	0.929,1.0,1.0,1.0	-0.106	0.106
10141	ENSMUSG00000029405.16	G3bp2	chr5	-	92063336	92063435	92057967	92058070	92064324	92064505	10141	31,49,46,109	134160142130	85,49,117,89	77129186104	248	149	0.00524447	0.089667	0.122,0.155,0.163,0.335	0.399,0.186,0.274,0.34	-0.106	0.106
10149	ENSMUSG00000003575.13	Crtc1	chr8	-	70402430	70402525	70400618	70400704	70439432	70439579	10149	3,3,19,5	8,0,3,0	3,2,14,4	0,0,1,0	244	149	0.000811305	0.0208404	0.186,1.0,0.795,1.0	1.0,1.0,0.895,1.0	-0.229	0.229
10150	ENSMUSG00000003575.13	Crtc1	chr8	-	70408894	70409011	70400618	70400704	70439432	70439575	10150	14,21,10,7	8,0,3,0	7,17,23,12	0,0,1,0	266	149	4.99312e-05	0.00234968	0.495,1.0,0.651,1.0	1.0,1.0,0.928,1.0	-0.196	0.196
10206	ENSMUSG00000039285.12	Azi2	chr9	+	118049896	118049996	118049309	118049435	118051353	118051502	10206	237203180305	27,27,18,31	149173270146	0,6,9,8	249	149	2.16567e-09	6.10368e-07	0.84,0.818,0.857,0.855	1.0,0.945,0.947,0.916	-0.11	0.11
10207	ENSMUSG00000039285.12	Azi2	chr9	+	118059619	118059666	118059056	118059175	118061713	118062489	10207	22,55,68,18	55,79,33,67	11,24,23,9	44,52,73,47	196	149	0.0207026	0.25447	0.233,0.346,0.61,0.17	0.16,0.26,0.193,0.127	0.155	0.155
10219	ENSMUSG00000035851.14	Ythdc1	chr5	+	86809304	86809340	86804495	86804591	86815628	86815730	10219	39,30,42,63	33,19,26,23	19,25,68,28	29,31,46,33	185	149	0.0127411	0.177507	0.488,0.56,0.565,0.688	0.345,0.394,0.544,0.406	0.153	0.153
10243	ENSMUSG00000036435.13	Exoc1	chr5	+	76557818	76557863	76554099	76554205	76559003	76559167	10243	14,13,14,13	7,6,6,15	7,2,3,17	6,11,13,9	194	149	0.0341321	0.365531	0.606,0.625,0.642,0.4	0.473,0.123,0.151,0.592	0.233	0.233
10269	ENSMUSG00000067367.9	Lyar	chr5	+	38222930	38223054	38220549	38220635	38223133	38223227	10269	6,2,6,0	4,4,5,5	2,2,0,0	1,7,1,5	273	149	0.00819257	0.127042	0.45,0.214,0.396,0.0	0.522,0.135,0.0,0.0	0.101	0.101
10348	ENSMUSG00000029207.16	Apbb2	chr5	-	66392272	66392335	66391771	66391857	66400075	66400281	10348	6,13,10,5	3,0,0,1	5,7,4,1	4,0,0,4	212	149	0.0290471	0.323851	0.584,1.0,1.0,0.778	0.468,1.0,1.0,0.149	0.186	0.186
10353	ENSMUSG00000029207.16	Apbb2	chr5	-	66543398	66543617	66492057	66492172	66618567	66618784	10353	3,8,5,13	0,2,4,0	1,11,16,11	0,1,0,0	298	149	0.00874639	0.1337	1.0,0.667,0.385,1.0	1.0,0.846,1.0,1.0	-0.199	0.199
10354	ENSMUSG00000029207.16	Apbb2	chr5	-	66543461	66543617	66492057	66492172	66618567	66618640	10354	3,14,9,20	0,2,4,0	3,16,20,17	0,1,0,0	298	149	0.0236537	0.279295	1.0,0.778,0.529,1.0	1.0,0.889,1.0,1.0	-0.146	0.146
10417	ENSMUSG00000021870.17	Slmap	chr14	-	26453537	26453600	26442574	26442634	26459903	26459954	10417	7,11,7,2	0,1,0,1	9,3,15,14	8,3,4,1	212	149	1.76548e-05	0.00100062	1.0,0.885,1.0,0.584	0.442,0.413,0.725,0.908	0.245	0.245
10422	ENSMUSG00000021870.17	Slmap	chr14	-	26459409	26459460	26453537	26453600	26460041	26460210	10422	9,24,27,6	4,8,0,0	14,9,31,24	0,0,0,0	200	149	9.11213e-06	0.00057594	0.626,0.691,1.0,1.0	1.0,1.0,1.0,1.0	-0.171	0.171
10424	ENSMUSG00000021870.17	Slmap	chr14	-	26459903	26459954	26453537	26453600	26460041	26460185	10424	3,8,9,7	4,8,0,0	15,9,24,16	0,0,0,0	200	149	2.36591e-05	0.00127374	0.358,0.427,1.0,1.0	1.0,1.0,1.0,1.0	-0.304	0.304
10433	ENSMUSG00000019907.10	Ppp1r12a	chr10	+	108252756	108252924	108251839	108251944	108253324	108253495	10433	32,62,44,69	2,19,0,31	70,37,81,71	2,7,0,0	298	149	0.000847241	0.0215683	0.889,0.62,1.0,0.527	0.946,0.725,1.0,1.0	-0.159	0.159
10435	ENSMUSG00000019907.10	Ppp1r12a	chr10	+	108253324	108253495	108252756	108252924	108259755	108259846	10435	25,72,43,82	3,7,0,8	78,45,60,39	5,0,0,0	298	149	0.000619994	0.0168476	0.806,0.837,1.0,0.837	0.886,1.0,1.0,1.0	-0.102	0.102
10445	ENSMUSG00000048874.15	Phf3	chr1	-	30837104	30837266	30824209	30824519	30873577	30873581	10445	7,5,6,11	2,1,7,0	12,14,10,3	0,0,0,1	298	149	2.65944e-05	0.00140249	0.636,0.714,0.3,1.0	1.0,1.0,1.0,0.6	-0.237	0.237
10448	ENSMUSG00000048874.15	Phf3	chr1	-	30862986	30863255	30831204	30831559	30873577	30873581	10448	45,79,34,44	2,1,4,7	30,20,23,22	0,9,6,5	298	149	0.0251861	0.292304	0.918,0.975,0.81,0.759	1.0,0.526,0.657,0.688	0.148	0.148
10454	ENSMUSG00000035614.11	Togaram1	chr12	+	64990940	64991090	64986392	64986490	64992544	64992640	10454	2,2,9,2	2,15,8,15	36,6,25,11	0,0,0,8	298	149	6.06178e-10	2.05686e-07	0.333,0.063,0.36,0.063	1.0,1.0,1.0,0.407	-0.647	0.647
10464	ENSMUSG00000030990.18	Pgap2	chr7	+	102223378	102223490	102223027	102223150	102226270	102226445	10464	116,160,80,190	5,15,11,19	82,54,99,89	1,0,8,0	261	149	3.51832e-05	0.00175494	0.93,0.859,0.806,0.851	0.979,1.0,0.876,1.0	-0.102	0.102
10480	ENSMUSG00000071451.10	Psmg4	chr13	+	34166060	34166136	34162963	34163249	34177980	34178173	10480	109,98,86,100	88,54,58,78	57,112,90,63	22,27,49,34	225	149	0.00335418	0.0633219	0.451,0.546,0.495,0.459	0.632,0.733,0.549,0.551	-0.129	0.129
10530	ENSMUSG00000014355.10	Anapc1	chr2	-	128680108	128680209	128679519	128679602	128680393	128680445	10530	25,32,17,31	10,9,21,5	35,29,36,31	9,9,4,0	250	149	0.0219049	0.264831	0.598,0.679,0.325,0.787	0.699,0.658,0.843,1.0	-0.203	0.203
10564	ENSMUSG00000014164.15	Klhl3	chr13	-	58016445	58016547	58013829	58013958	58018796	58018994	10564	7,5,4,3	0,0,2,0	6,7,1,7	0,0,6,1	251	149	0.0490518	0.481429	1.0,1.0,0.543,1.0	1.0,1.0,0.09,0.806	0.162	0.162
10611	ENSMUSG00000054280.14	Prr14l	chr5	-	32844043	32844564	32835615	32835688	32854092	32854256	10611	14,17,12,32	0,0,1,0	5,17,6,5	0,2,1,5	298	149	0.000129242	0.00498934	1.0,1.0,0.857,1.0	1.0,0.81,0.75,0.333	0.241	0.241
10641	ENSMUSG00000015942.9	Gtf2ird2	chr5	+	134206770	134206827	134203270	134203348	134208879	134208942	10641	0,1,5,6	1,0,1,2	7,3,0,0	0,3,2,4	206	149	0.0108145	0.15774	0.0,1.0,0.783,0.685	1.0,0.42,0.0,0.0	0.262	0.262
10697	ENSMUSG00000062822.8	4833420G17Rik	chr13	+	119464564	119464690	119462771	119463119	119466073	119466304	10697	20,5,17,19	24,44,45,49	14,13,19,18	11,12,19,21	275	149	0.000292959	0.00938488	0.311,0.058,0.17,0.174	0.408,0.37,0.351,0.317	-0.183	0.183
10828	ENSMUSG00000020160.18	Meis1	chr11	-	18941658	18941804	18905688	18905765	18988267	18988379	10828	8,6,12,23	0,5,1,0	7,5,19,17	0,0,0,0	295	149	0.0323224	0.350222	1.0,0.377,0.858,1.0	1.0,1.0,1.0,1.0	-0.191	0.191
10838	ENSMUSG00000029068.16	Ccnl2	chr4	+	155818538	155818664	155817922	155817987	155820328	155820428	10838	43,68,63,78	12,8,19,13	106,125,79,92	9,16,5,15	275	149	0.015967	0.209873	0.66,0.822,0.642,0.765	0.865,0.809,0.895,0.769	-0.112	0.112
10846	ENSMUSG00000042508.16	Dmtf1	chr5	-	9126539	9126643	9124441	9124527	9127956	9128108	10846	13,16,3,22	10,13,3,10	37,16,11,14	3,9,5,3	253	149	0.0177897	0.227786	0.434,0.42,0.371,0.564	0.879,0.511,0.564,0.733	-0.225	0.225
10851	ENSMUSG00000042508.16	Dmtf1	chr5	-	9148899	9149022	9139817	9140480	9150375	9150492	10851	35,29,31,29	0,0,2,8	17,28,23,18	0,0,0,0	272	149	0.000357726	0.0109953	1.0,1.0,0.895,0.665	1.0,1.0,1.0,1.0	-0.11	0.11
10855	ENSMUSG00000054099.11	Slc25a40	chr5	+	8424796	8424887	8422872	8423039	8427195	8427267	10855	1,6,1,1	3,7,6,6	0,2,0,0	16,14,1,4	240	149	0.000348462	0.0107747	0.171,0.347,0.094,0.094	0.0,0.081,0.0,0.0	0.156	0.156
10875	ENSMUSG00000109378.1	Gm49396	chr7	+	30564702	30564798	30564473	30564607	30565094	30566381	10875	112,44,59,113	25,25,21,6	61,79,78,93	4,10,0,5	245	149	4.14396e-05	0.00201631	0.732,0.517,0.631,0.92	0.903,0.828,1.0,0.919	-0.212	0.212
10922	ENSMUSG00000038056.15	Kmt2c	chr5	-	25295397	25295610	25293106	25293248	25298869	25300075	10922	7,9,9,9	0,15,0,9	0,0,7,13	4,3,11,14	298	149	0.00533141	0.0905111	1.0,0.231,1.0,0.333	0.0,0.0,0.241,0.317	0.502	0.502
10936	ENSMUSG00000024831.14	Ighmbp2	chr19	-	3272887	3273035	3271525	3271700	3274355	3274556	10936	9,8,11,13	0,0,0,0	4,15,14,6	1,4,1,0	297	149	0.0134073	0.1843	1.0,1.0,1.0,1.0	0.667,0.653,0.875,1.0	0.201	0.201
10958	ENSMUSG00000000296.8	Tpd52l1	chr10	-	31341139	31341178	31332626	31332969	31346610	31346712	10958	3,5,15,5	38,17,37,10	0,0,4,1	8,33,13,11	188	149	0.000298888	0.00952748	0.059,0.189,0.243,0.284	0.0,0.0,0.196,0.067	0.128	0.128
11022	ENSMUSG00000029032.12	Arhgef16	chr4	-	154292831	154292942	154290935	154291553	154299824	154299892	11022	11,30,9,29	0,1,0,0	14,9,18,13	0,4,3,0	260	149	0.00497203	0.0862265	1.0,0.945,1.0,1.0	1.0,0.563,0.775,1.0	0.152	0.152
11200	ENSMUSG00000024426.17	Atat1	chr17	-	35904107	35904176	35902355	35902438	35904289	35904327	11200	1,6,1,0	7,4,7,6	5,11,3,6	0,1,3,0	218	149	1.20547e-07	1.80736e-05	0.089,0.506,0.089,0.0	1.0,0.883,0.406,1.0	-0.651	0.651
11220	ENSMUSG00000027677.17	Ttc14	chr3	+	33803449	33803605	33803074	33803204	33803999	33804071	11220	47,61,27,67	5,0,12,0	49,42,37,51	10,0,9,24	298	149	0.0357908	0.380294	0.825,1.0,0.529,1.0	0.71,1.0,0.673,0.515	0.114	0.114
11265	ENSMUSG00000028917.14	Plekhm2	chr4	-	141637424	141637484	141634252	141634478	141639675	141639862	11265	35,59,35,53	0,1,1,0	19,9,20,20	0,8,23,0	209	149	4.42769e-06	0.000320734	1.0,0.977,0.961,1.0	1.0,0.445,0.383,1.0	0.277	0.277
11370	ENSMUSG00000024273.8	2700062C07Rik	chr18	+	24472949	24473149	24470850	24471084	24475524	24475724	11370	43,45,31,75	2,3,3,5	26,12,47,46	0,0,0,0	298	149	1.14717e-05	0.000694442	0.915,0.882,0.838,0.882	1.0,1.0,1.0,1.0	-0.121	0.121
11413	ENSMUSG00000016510.11	Mtif3	chr5	-	146963220	146963380	146958824	146959276	146963711	146963749	11413	22,22,19,69	3,13,3,12	23,16,29,37	18,17,18,9	298	149	0.0126817	0.176968	0.786,0.458,0.76,0.742	0.39,0.32,0.446,0.673	0.229	0.229
11466	ENSMUSG00000028899.11	Taf12	chr4	+	132282793	132283045	132274374	132274487	132289314	132289429	11466	23,17,23,36	0,4,1,3	27,20,58,13	0,0,0,0	298	149	0.00167332	0.0364456	1.0,0.68,0.92,0.857	1.0,1.0,1.0,1.0	-0.136	0.136
11467	ENSMUSG00000028899.11	Taf12	chr4	+	132285043	132285121	132274374	132274487	132289314	132289429	11467	21,25,18,19	0,4,1,3	27,8,27,35	0,0,0,0	227	149	0.00247785	0.0499685	1.0,0.804,0.922,0.806	1.0,1.0,1.0,1.0	-0.117	0.117
11479	ENSMUSG00000026035.15	Ppil3	chr1	-	58438343	58438411	58433786	58434449	58440842	58440936	11479	42,48,25,48	7,3,11,1	42,49,37,37	0,1,1,3	217	149	0.000167668	0.0060592	0.805,0.917,0.609,0.971	1.0,0.971,0.962,0.894	-0.131	0.131
11503	ENSMUSG00000021809.10	Nudt13	chr14	+	20295087	20295266	20294713	20294792	20300586	20300679	11503	2,3,8,3	0,2,0,0	6,1,0,6	0,6,5,0	298	149	0.000627345	0.0170294	1.0,0.429,1.0,1.0	1.0,0.077,0.0,1.0	0.338	0.338
11505	ENSMUSG00000021809.10	Nudt13	chr14	+	20297514	20297631	20294747	20294792	20300586	20300679	11505	1,3,4,4	0,2,0,0	4,0,1,3	0,6,5,0	266	149	0.000506399	0.014398	1.0,0.457,1.0,1.0	1.0,0.0,0.101,1.0	0.339	0.339
11525	ENSMUSG00000002486.15	Tchp	chr5	+	114709033	114709212	114708653	114708838	114709306	114709440	11525	0,0,0,0	5,10,1,1	0,4,2,0	4,1,0,1	298	149	0.0327396	0.353555	0.0,0.0,0.0,0.0	0.0,0.667,1.0,0.0	-0.417	0.417
11579	ENSMUSG00000043962.16	Thrap3	chr4	-	126194316	126194404	126186245	126186588	126202569	126202659	11579	58,83,90,114	44,64,48,70	118,61,123,65	46,25,26,18	237	149	1.98621e-05	0.00110866	0.453,0.449,0.541,0.506	0.617,0.605,0.748,0.694	-0.179	0.179
11602	ENSMUSG00000000159.16	Igsf5	chr16	+	96378084	96378384	96372829	96373147	96386485	96386626	11602	77,58,39,37	89,105,78,103	11,6,20,12	148,90,85,93	298	149	1.11022e-16	1.30138e-13	0.302,0.216,0.2,0.152	0.036,0.032,0.105,0.061	0.159	0.159
11629	ENSMUSG00000058317.12	Ube2e2	chr14	-	18871493	18871544	18630298	18630431	18888265	18888297	11629	112,61,134,77	22,14,8,17	81,123,80,63	0,12,1,7	200	149	9.31321e-05	0.00382435	0.791,0.764,0.926,0.771	1.0,0.884,0.983,0.87	-0.121	0.121
11634	ENSMUSG00000028649.21	Macf1	chr4	-	123354478	123354580	123351821	123351951	123355055	123355267	11634	26,43,28,86	67,27,64,30	61,67,116,75	27,63,30,27	251	149	0.0207488	0.254795	0.187,0.486,0.206,0.63	0.573,0.387,0.697,0.622	-0.193	0.193
11679	ENSMUSG00000028653.16	Trit1	chr4	+	123052065	123052175	123049476	123049554	123052483	123052601	11679	35,30,48,58	9,8,5,14	40,41,33,49	7,1,3,4	259	149	0.00760592	0.120111	0.691,0.683,0.847,0.704	0.767,0.959,0.864,0.876	-0.135	0.135
11700	ENSMUSG00000004558.15	Ndrg2	chr14	-	51911085	51911127	51910505	51910785	51911465	51911546	11700	1739,717,1699,647	305433407185	1523,2506,1012,1191	298294154237	191	149	0.000352558	0.0108623	0.816,0.564,0.765,0.732	0.799,0.869,0.837,0.797	-0.106	0.106
11756	ENSMUSG00000054894.6	Dmac2l	chr12	+	69725454	69725554	69724949	69725014	69737950	69738061	11756	3,4,3,5	10,0,9,0	12,1,5,8	0,3,0,0	249	149	0.00846456	0.130337	0.152,1.0,0.166,1.0	1.0,0.166,1.0,1.0	-0.212	0.212
11902	ENSMUSG00000059027.14	9630013D21Rik	chr4	-	109654025	109654111	109651528	109653111	109656400	109657827	11902	40,67,43,56	0,2,0,0	78,42,58,93	9,5,0,13	235	149	1.1894e-07	1.7937e-05	1.0,0.955,1.0,1.0	0.846,0.842,1.0,0.819	0.112	0.112
12022	ENSMUSG00000024392.17	Bag6	chr17	+	35146756	35146903	35146245	35146353	35147140	35147305	12022	169115129171	48,59,24,62	64132116115	72,54,43,66	296	149	0.0225837	0.270439	0.639,0.495,0.73,0.581	0.309,0.552,0.576,0.467	0.135	0.135
12070	ENSMUSG00000059475.13	Zfp426	chr9	-	20474906	20475033	20473027	20473108	20476395	20476478	12070	14,14,5,22	7,0,1,1	13,31,28,13	3,0,0,0	276	149	0.000810336	0.0208404	0.519,1.0,0.73,0.922	0.701,1.0,1.0,1.0	-0.132	0.132
12072	ENSMUSG00000059475.13	Zfp426	chr9	-	20474910	20475033	20473027	20473108	20476395	20476478	12072	0,15,1,11	7,0,1,1	9,19,22,17	3,0,0,0	272	149	0.00385051	0.0700458	0.0,1.0,0.354,0.858	0.622,1.0,1.0,1.0	-0.352	0.352
12091	ENSMUSG00000056069.10	Otulinl	chr15	-	27662338	27662488	27659889	27660018	27664343	27664435	12091	23,47,21,39	2,6,4,1	4,12,11,8	0,1,0,0	298	149	2.27736e-05	0.00123379	0.852,0.797,0.724,0.951	1.0,0.857,1.0,1.0	-0.133	0.133
12126	ENSMUSG00000022971.18	Ifnar2	chr16	+	91399217	91399345	91393756	91393913	91403709	91405589	12126	49,84,17,51	1,0,1,0	17,25,43,60	9,0,8,0	277	149	1.62218e-05	0.000940065	0.963,1.0,0.901,1.0	0.504,1.0,0.743,1.0	0.154	0.154
12158	ENSMUSG00000015522.18	Arnt	chr3	+	95466792	95466837	95460376	95460421	95470176	95470390	12158	63,36,35,20	14,16,29,7	32,38,31,30	19,2,0,0	194	149	0.000377048	0.0114511	0.776,0.633,0.481,0.687	0.564,0.936,1.0,1.0	-0.231	0.231
12230	ENSMUSG00000028496.17	Mllt3	chr4	-	87782286	87782358	87769924	87774146	87783648	87783720	12230	9,40,8,14	2,8,0,0	10,10,14,5	0,0,0,0	221	149	0.000116011	0.00456052	0.752,0.771,1.0,1.0	1.0,1.0,1.0,1.0	-0.119	0.119
12258	ENSMUSG00000013787.15	Ehmt2	chr17	+	34905609	34905711	34905341	34905456	34905909	34906058	12258	68,35,76,99	80,35,84,38	77,121,110,93	40,82,32,43	251	149	0.0189012	0.237536	0.335,0.372,0.349,0.607	0.533,0.467,0.671,0.562	-0.143	0.143
12269	ENSMUSG00000028483.13	Snapc3	chr4	+	83460162	83460359	83453805	83454148	83465964	83466137	12269	0,5,2,2	1,5,2,10	5,1,6,11	2,3,3,0	298	149	0.00879324	0.134257	0.0,0.333,0.333,0.091	0.556,0.143,0.5,1.0	-0.36	0.36
12284	ENSMUSG00000037876.17	Jmjd1c	chr10	+	67216982	67217107	67215269	67215375	67218116	67218181	12284	3,4,2,3	5,2,0,1	10,6,11,2	0,0,0,8	274	149	0.0189555	0.237986	0.246,0.521,1.0,0.62	1.0,1.0,1.0,0.12	-0.183	0.183
12396	ENSMUSG00000040451.18	Sgms1	chr19	-	32289540	32289631	32247993	32248036	32351944	32352023	12396	17,21,21,40	0,2,7,0	13,30,14,13	0,0,0,0	240	149	0.00113949	0.0271834	1.0,0.867,0.651,1.0	1.0,1.0,1.0,1.0	-0.121	0.121
12418	ENSMUSG00000031644.19	Nek1	chr8	+	61044258	61044333	61044059	61044107	61049783	61049947	12418	3,16,10,14	0,1,0,0	2,11,10,1	12,1,1,0	224	149	0.000602617	0.0164622	1.0,0.914,1.0,1.0	0.1,0.88,0.869,1.0	0.266	0.266
12419	ENSMUSG00000031644.19	Nek1	chr8	+	61050027	61050159	61049783	61049947	61054519	61054622	12419	0,0,0,0	7,8,5,2	0,1,6,12	1,8,0,0	281	149	2.06261e-05	0.00114388	0.0,0.0,0.0,0.0	0.0,0.062,1.0,1.0	-0.516	0.516
12422	ENSMUSG00000031644.19	Nek1	chr8	+	61106794	61107033	61105550	61105639	61120908	61121060	12422	9,32,12,40	8,0,0,0	29,18,34,34	0,0,0,0	298	149	0.028171	0.316408	0.36,1.0,1.0,1.0	1.0,1.0,1.0,1.0	-0.16	0.16
12426	ENSMUSG00000039637.15	Coro7	chr16	-	4633254	4633396	4632412	4632521	4633713	4633837	12426	14,39,40,56	3,0,1,4	33,42,55,30	0,0,0,0	291	149	0.00907912	0.137482	0.705,1.0,0.953,0.878	1.0,1.0,1.0,1.0	-0.116	0.116
12463	ENSMUSG00000026648.18	Dclre1c	chr2	+	3429267	3429352	3425363	3425415	3433746	3433806	12463	11,5,18,9	3,3,0,1	13,14,9,7	0,0,0,0	234	149	0.00187224	0.0396724	0.7,0.515,1.0,0.851	1.0,1.0,1.0,1.0	-0.234	0.234
12489	ENSMUSG00000035325.16	Sec31a	chr5	-	100369595	100369634	100368293	100368352	100373379	100373715	12489	56,101,89,181	50,43,14,72	105,99,182,161	39,7,17,20	188	149	0.000379872	0.0114945	0.47,0.651,0.834,0.666	0.681,0.918,0.895,0.864	-0.184	0.184
12490	ENSMUSG00000035325.16	Sec31a	chr5	-	100369595	100369634	100368293	100368352	100373424	100373484	12490	48,60,47,78	29,52,25,49	82,70,83,83	14,8,18,36	188	149	9.38542e-07	9.72874e-05	0.567,0.478,0.598,0.558	0.823,0.874,0.785,0.646	-0.232	0.232
12495	ENSMUSG00000035325.16	Sec31a	chr5	-	100388533	100388611	100386127	100386203	100390758	100390833	12495	51,72,52,51	23,14,23,29	59,63,52,63	10,4,2,13	227	149	1.66446e-05	0.000957818	0.593,0.771,0.597,0.536	0.795,0.912,0.945,0.761	-0.229	0.229
12496	ENSMUSG00000035325.16	Sec31a	chr5	-	100389067	100389106	100386127	100386203	100390758	100390833	12496	50,63,79,92	23,14,23,29	57,54,67,60	10,4,2,13	188	149	0.000108482	0.00432387	0.633,0.781,0.731,0.715	0.819,0.915,0.964,0.785	-0.156	0.156
12537	ENSMUSG00000042625.16	Safb2	chr17	-	56575354	56576012	56574902	56574952	56576877	56576905	12537	49,73,53,103	0,0,11,0	49,47,105,58	9,6,12,5	298	149	0.000593741	0.0162714	1.0,1.0,0.707,1.0	0.731,0.797,0.814,0.853	0.128	0.128
12551	ENSMUSG00000027936.18	Crtc2	chr3	+	90259153	90259222	90254162	90254558	90259385	90259492	12551	28,13,23,4	0,9,2,0	19,17,6,3	0,0,0,0	218	149	0.000206261	0.00713012	1.0,0.497,0.887,1.0	1.0,1.0,1.0,1.0	-0.154	0.154
12552	ENSMUSG00000027936.18	Crtc2	chr3	+	90259153	90259222	90257116	90257218	90259385	90259492	12552	28,13,25,4	0,9,2,0	17,15,6,3	10,11,0,5	218	149	0.0130538	0.18118	1.0,0.497,0.895,1.0	0.537,0.482,1.0,0.291	0.27	0.27
12562	ENSMUSG00000038729.24	Pakap	chr4	+	57883023	57883202	57854158	57857037	57892868	57896982	12562	19,18,14,26	8,17,13,19	0,2,5,3	8,11,5,2	298	149	0.00200425	0.0419781	0.543,0.346,0.35,0.406	0.0,0.083,0.333,0.429	0.2	0.2
12611	ENSMUSG00000070985.3	Acnat1	chr4	-	49473417	49473522	49458719	49458849	49473782	49473912	12611	2,2,2,3	4,5,0,2	4,5,9,9	0,0,0,0	254	149	2.88355e-09	7.91075e-07	0.227,0.19,1.0,0.468	1.0,1.0,1.0,1.0	-0.529	0.529
12665	ENSMUSG00000078713.8	Tomm5	chr4	-	45106838	45106888	45105211	45105644	45107916	45108108	12665	10,30,20,21	21,42,22,15	6,9,1,3	5,1,0,2	199	149	0.0270703	0.307392	0.263,0.348,0.405,0.512	0.473,0.871,1.0,0.529	-0.336	0.336
12747	ENSMUSG00000028459.11	Cd72	chr4	-	43448259	43448394	43447723	43448036	43449451	43449528	12747	15,24,8,12	0,0,0,0	9,10,3,4	1,0,0,8	284	149	0.00488987	0.0850303	1.0,1.0,1.0,1.0	0.825,1.0,1.0,0.208	0.242	0.242
12748	ENSMUSG00000028459.11	Cd72	chr4	-	43448259	43448415	43446461	43448036	43449451	43449528	12748	36,58,15,47	0,0,0,0	27,21,15,11	1,0,0,8	298	149	0.00372299	0.0686265	1.0,1.0,1.0,1.0	0.931,1.0,1.0,0.407	0.165	0.165
12753	ENSMUSG00000028459.11	Cd72	chr4	-	43453640	43453712	43453082	43453172	43454241	43454349	12753	10,12,9,32	4,4,2,14	8,22,0,1	0,0,1,2	221	149	0.0256443	0.295494	0.628,0.669,0.752,0.606	1.0,1.0,0.0,0.252	0.101	0.101
12878	ENSMUSG00000028295.14	Smim8	chr4	-	34771877	34772053	34770887	34771414	34778223	34778270	12878	7,9,6,6	20,2,4,10	0,2,4,1	20,11,18,8	298	149	2.13364e-05	0.00117069	0.149,0.692,0.429,0.231	0.0,0.083,0.1,0.059	0.315	0.315
12954	ENSMUSG00000027016.17	Zfp385b	chr2	-	77481326	77481365	77476734	77476845	77503539	77503682	12954	0,0,0,0	21,6,27,29	7,7,3,0	29,20,17,28	188	149	5.19444e-07	6.11663e-05	0.0,0.0,0.0,0.0	0.161,0.217,0.123,0.0	-0.125	0.125
12956	ENSMUSG00000029722.15	Agfg2	chr5	-	137660161	137660194	137655607	137655728	137661363	137661489	12956	28,26,21,33	47,93,60,63	27,23,50,23	44,34,52,40	182	149	0.0069867	0.112048	0.328,0.186,0.223,0.3	0.334,0.356,0.44,0.32	-0.103	0.103
12960	ENSMUSG00000028411.15	Aptx	chr4	-	40695376	40695418	40694851	40695136	40697216	40697353	12960	18,17,14,21	3,4,0,0	4,24,9,6	0,0,0,0	191	149	0.0287888	0.321806	0.824,0.768,1.0,1.0	1.0,1.0,1.0,1.0	-0.102	0.102
13070	ENSMUSG00000028207.18	Asph	chr4	-	9598732	9598780	9598268	9598301	9601306	9601363	13070	29,20,30,42	9,23,4,35	24,18,11,26	25,23,34,17	197	149	0.0176321	0.226217	0.709,0.397,0.85,0.476	0.421,0.372,0.197,0.536	0.226	0.226
13117	ENSMUSG00000028689.14	Ccdc163	chr4	+	116714015	116714149	116710100	116710284	116714839	116714954	13117	15,8,12,9	0,3,3,5	13,21,8,4	0,0,1,0	283	149	9.08155e-07	9.52013e-05	1.0,0.584,0.678,0.487	1.0,1.0,0.808,1.0	-0.265	0.265
13119	ENSMUSG00000028689.14	Ccdc163	chr4	+	116714087	116714149	116710100	116710284	116714839	116714954	13119	10,5,3,5	0,3,3,5	2,8,6,2	0,0,1,0	211	149	1.11156e-06	0.000112854	1.0,0.541,0.414,0.414	1.0,1.0,0.809,1.0	-0.36	0.36
13131	ENSMUSG00000074513.9	Arfip1	chr3	-	84529190	84529265	84527685	84527798	84534586	84534695	13131	24,17,16,30	0,0,14,6	7,13,25,12	2,0,0,0	224	149	0.000200375	0.00696398	1.0,1.0,0.432,0.769	0.7,1.0,1.0,1.0	-0.125	0.125
13187	ENSMUSG00000078485.3	Plekhn1	chr4	-	156230900	156230974	156230504	156230686	156231084	156231173	13187	3,8,11,4	2,0,2,3	14,10,6,10	0,0,0,0	223	149	0.000469311	0.013605	0.501,1.0,0.786,0.471	1.0,1.0,1.0,1.0	-0.31	0.31
13190	ENSMUSG00000029822.15	Osbpl3	chr6	-	50346010	50346103	50344873	50345030	50346327	50346431	13190	20,31,5,33	1,10,2,6	1,13,2,2	0,1,1,0	242	149	0.000191037	0.00672097	0.925,0.656,0.606,0.772	1.0,0.889,0.552,1.0	-0.121	0.121
13214	ENSMUSG00000028402.18	Mpdz	chr4	-	81313499	81313598	81310156	81310319	81317593	81317704	13214	2,9,4,2	4,2,2,5	1,2,3,0	14,10,8,13	248	149	0.000112002	0.00443672	0.231,0.73,0.546,0.194	0.041,0.107,0.184,0.0	0.342	0.342
13220	ENSMUSG00000028402.18	Mpdz	chr4	-	81358625	81358742	81356329	81356497	81360003	81360213	13220	0,2,6,0	2,6,3,2	0,1,0,0	7,2,3,3	266	149	0.00543384	0.0916467	0.0,0.157,0.528,0.0	0.0,0.219,0.0,0.0	0.117	0.117
13247	ENSMUSG00000039068.16	Zzz3	chr3	+	152427276	152428832	152420014	152420140	152446798	152446937	13247	8,26,10,26	11,5,7,3	37,18,18,14	0,0,7,5	298	149	0.0288208	0.322023	0.267,0.722,0.417,0.813	1.0,1.0,0.563,0.583	-0.232	0.232
13250	ENSMUSG00000039068.16	Zzz3	chr3	+	152427276	152428832	152422617	152422771	152446798	152446937	13250	12,46,20,51	1,5,6,9	60,18,45,32	0,1,0,7	298	149	0.00467616	0.0820333	0.857,0.821,0.625,0.739	1.0,0.9,1.0,0.696	-0.139	0.139
13302	ENSMUSG00000028184.12	Adgrl2	chr3	-	148820972	148821054	148817721	148817928	148822954	148823051	13302	1,11,1,9	25,35,21,48	7,12,18,10	42,27,21,31	231	149	0.00551408	0.0926969	0.025,0.169,0.03,0.108	0.097,0.223,0.356,0.172	-0.129	0.129
13425	ENSMUSG00000005102.13	Eif2ak4	chr2	+	118446259	118446313	118443124	118443226	118448275	118448512	13425	11,23,18,25	0,1,0,0	27,16,6,28	2,1,4,12	203	149	2.82691e-07	3.66333e-05	1.0,0.944,1.0,1.0	0.908,0.922,0.524,0.631	0.24	0.24
13434	ENSMUSG00000028268.14	Gbp3	chr3	+	142560495	142560690	142560025	142560283	142561739	142561935	13434	3,14,6,7	0,0,2,0	4,9,2,2	0,3,3,0	298	149	0.00825208	0.127739	1.0,1.0,0.6,1.0	1.0,0.6,0.25,1.0	0.188	0.188
13447	ENSMUSG00000032580.12	Rbm5	chr9	-	107759775	107759849	107756908	107756992	107760321	107760391	13447	26,43,16,23	2,4,3,5	64,35,41,29	1,0,1,3	223	149	0.000547203	0.0153717	0.897,0.878,0.781,0.755	0.977,1.0,0.965,0.866	-0.124	0.124
13528	ENSMUSG00000068762.11	Gstm6	chr3	-	107942332	107942414	107941188	107941284	107942701	107942766	13528	55,48,69,19	23,15,28,16	53,43,38,24	5,8,5,4	231	149	2.84071e-05	0.00147992	0.607,0.674,0.614,0.434	0.872,0.776,0.831,0.795	-0.236	0.236
13570	ENSMUSG00000030035.14	Wbp1	chr6	-	83120771	83120873	83120184	83120287	83121202	83121387	13570	43,38,38,56	21,9,15,7	33,36,47,68	5,12,4,1	251	149	0.0094107	0.141259	0.549,0.715,0.601,0.826	0.797,0.64,0.875,0.976	-0.149	0.149
13571	ENSMUSG00000030035.14	Wbp1	chr6	-	83120771	83120876	83120184	83120287	83121202	83121406	13571	69,51,43,70	21,9,15,7	56,69,58,62	5,12,4,1	254	149	0.00209094	0.0434847	0.658,0.769,0.627,0.854	0.868,0.771,0.895,0.973	-0.15	0.15
13602	ENSMUSG00000047141.5	Zfp654	chr16	-	64788304	64788446	64784506	64786802	64791086	64791226	13602	25,49,30,34	0,0,0,0	30,31,28,21	5,3,0,0	291	149	0.00381784	0.0698258	1.0,1.0,1.0,1.0	0.754,0.841,1.0,1.0	0.101	0.101
13661	ENSMUSG00000034832.15	Tet3	chr6	-	83441216	83441273	83402666	83404824	83454749	83455480	13661	14,8,13,11	0,7,4,0	16,27,5,9	2,1,0,0	206	149	0.00102739	0.0249947	1.0,0.453,0.702,1.0	0.853,0.951,1.0,1.0	-0.162	0.162
13730	ENSMUSG00000028007.13	Snx7	chr3	-	117800840	117800993	117781646	117782376	117829576	117829663	13730	72,126,77,110	10,24,34,9	98108132135	4,14,16,11	298	149	0.0142455	0.193216	0.783,0.724,0.531,0.859	0.925,0.794,0.805,0.86	-0.122	0.122
13760	ENSMUSG00000002625.10	Akap8l	chr17	-	32335110	32335170	32334587	32334696	32335562	32335623	13760	5,9,3,0	16,33,18,14	13,19,9,7	11,22,4,13	209	149	2.0825e-05	0.00114997	0.182,0.163,0.106,0.0	0.457,0.381,0.616,0.277	-0.32	0.32
13791	ENSMUSG00000116810.1	Gm32624	chr16	+	86835976	86836071	86828001	86828094	86876893	86878648	13791	4,0,0,2	7,8,2,10	4,3,9,4	12,5,12,15	244	149	0.0238595	0.281468	0.259,0.0,0.0,0.109	0.169,0.268,0.314,0.14	-0.131	0.131
13803	ENSMUSG00000030452.16	Nipa2	chr7	-	55961451	55961572	55944480	55944709	55962395	55962430	13803	39,30,20,61	4,2,6,8	17,39,15,16	0,1,3,0	270	149	0.000803239	0.0206932	0.843,0.892,0.648,0.808	1.0,0.956,0.734,1.0	-0.125	0.125
13827	ENSMUSG00000022779.16	Top3b	chr16	+	16875068	16875155	16870839	16871055	16877831	16878016	13827	7,10,8,12	4,1,0,1	12,5,17,11	0,5,11,7	236	149	0.0271675	0.307684	0.525,0.863,1.0,0.883	1.0,0.387,0.494,0.498	0.223	0.223
13940	ENSMUSG00000056260.15	Lrif1	chr3	+	106731662	106733142	106721892	106722106	106734357	106734639	13940	3,17,20,18	1,2,4,2	24,6,11,20	1,3,0,0	298	149	0.0256304	0.295466	0.6,0.81,0.714,0.818	0.923,0.5,1.0,1.0	-0.12	0.12
13941	ENSMUSG00000056260.15	Lrif1	chr3	+	106733336	106733606	106731662	106733142	106734357	106734382	13941	3,7,1,8	3,7,16,5	4,1,1,0	11,3,3,13	298	149	0.00606309	0.100099	0.333,0.333,0.03,0.444	0.154,0.143,0.143,0.0	0.175	0.175
13981	ENSMUSG00000029234.13	Tmem165	chr5	+	76207801	76207907	76204636	76204816	76208509	76209245	13981	69,82,36,95	0,3,20,1	27,66,55,26	2,1,0,0	255	149	0.00102299	0.024963	1.0,0.941,0.513,0.982	0.887,0.975,1.0,1.0	-0.107	0.107
14075	ENSMUSG00000048271.14	Rbm33	chr5	+	28342394	28342514	28338995	28339308	28352471	28352643	14075	29,44,45,68	11,7,8,16	41,23,55,24	24,14,26,9	269	149	0.00129517	0.0299819	0.594,0.777,0.757,0.702	0.486,0.476,0.54,0.596	0.183	0.183
14090	ENSMUSG00000001802.16	Lrp3	chr7	-	35211434	35211497	35206036	35206175	35213139	35213187	14090	12,6,24,20	0,9,1,0	16,7,9,18	1,0,0,0	212	149	0.0100869	0.149581	1.0,0.319,0.944,1.0	0.918,1.0,1.0,1.0	-0.164	0.164
14128	ENSMUSG00000034602.15	Mon2	chr10	-	123009912	123009930	123009502	123009631	123010493	123010637	14128	4,0,12,3	47,74,52,62	10,11,33,7	54,62,66,54	167	149	0.000138659	0.00522482	0.071,0.0,0.171,0.041	0.142,0.137,0.308,0.104	-0.102	0.102
14188	ENSMUSG00000054611.17	Kdm2a	chr19	-	4388940	4389057	4362775	4362914	4394791	4394892	14188	4,14,3,5	37,55,37,58	4,11,21,11	39,13,56,35	266	149	0.0035405	0.0659699	0.057,0.125,0.043,0.046	0.054,0.322,0.174,0.15	-0.107	0.107
14237	ENSMUSG00000028107.14	Tars2	chr3	-	95750866	95750984	95750700	95750765	95753006	95753130	14237	5,19,7,15	2,0,6,0	3,17,12,11	0,0,0,0	267	149	0.00108151	0.0260167	0.582,1.0,0.394,1.0	1.0,1.0,1.0,1.0	-0.256	0.256
14375	ENSMUSG00000034035.18	Ccdc17	chr4	+	116599556	116599667	116599288	116599490	116599886	116600201	14375	4,7,0,13	0,0,5,0	11,4,17,18	11,2,6,0	260	149	0.0258613	0.297596	1.0,1.0,0.0,1.0	0.364,0.534,0.619,1.0	0.121	0.121
14397	ENSMUSG00000040481.17	Bptf	chr11	-	107044491	107044665	107043632	107043825	107046999	107047343	14397	12,13,5,15	16,24,25,9	22,19,32,25	16,10,14,20	298	149	0.00254935	0.0510055	0.273,0.213,0.091,0.455	0.407,0.487,0.533,0.385	-0.195	0.195
14428	ENSMUSG00000038481.13	Cdk19	chr10	+	40454014	40454072	40436071	40436212	40466637	40466769	14428	11,9,14,8	2,12,3,0	13,10,19,8	0,2,2,0	207	149	0.00165524	0.0362047	0.798,0.351,0.771,1.0	1.0,0.783,0.872,1.0	-0.184	0.184
14439	ENSMUSG00000030254.16	Rad18	chr6	-	112628461	112628524	112619944	112620904	112644587	112644747	14439	2,0,24,11	2,18,7,0	1,0,10,3	0,3,0,1	212	149	0.0463502	0.461676	0.413,0.0,0.707,1.0	1.0,0.0,1.0,0.678	-0.139	0.139
14453	ENSMUSG00000026836.15	Acvr1	chr2	-	58507276	58507521	58500483	58500557	58516023	58516300	14453	6,15,1,0	0,10,10,5	0,1,0,1	6,3,7,4	298	149	0.000948851	0.0235494	1.0,0.429,0.048,0.0	0.0,0.143,0.0,0.111	0.306	0.306
14454	ENSMUSG00000026836.15	Acvr1	chr2	-	58507276	58507521	58500483	58500557	58537777	58537873	14454	6,11,1,3	10,12,16,38	2,1,0,1	13,10,10,18	298	149	0.000365496	0.0111808	0.231,0.314,0.03,0.038	0.071,0.048,0.0,0.027	0.117	0.117
14459	ENSMUSG00000054252.18	Fgfr3	chr5	+	33728191	33728245	33727646	33727916	33729680	33729837	14459	5,78,26,20	6,0,3,0	24,41,6,8	2,0,0,0	203	149	0.00943555	0.141472	0.38,1.0,0.864,1.0	0.898,1.0,1.0,1.0	-0.164	0.164
14535	ENSMUSG00000028064.17	Sema4a	chr3	-	88455547	88455684	88454678	88454846	88456133	88456415	14535	73,60,112,62	21,18,21,16	88,105,86,83	16,7,9,14	286	149	0.00240466	0.0488161	0.644,0.635,0.735,0.669	0.741,0.887,0.833,0.755	-0.133	0.133
14549	ENSMUSG00000090100.7	Ttbk2	chr2	-	120825241	120825315	120822472	120822608	120850055	120850390	14549	12,5,10,15	2,0,2,2	5,2,18,15	8,0,6,3	223	149	0.0408861	0.422588	0.8,1.0,0.77,0.834	0.295,1.0,0.667,0.77	0.168	0.168
14579	ENSMUSG00000021276.10	Cinp	chr12	-	110878987	110879039	110877222	110877372	110879684	110879814	14579	4,4,6,1	0,5,1,1	0,0,5,0	1,3,2,4	201	149	0.000223741	0.0075819	1.0,0.372,0.816,0.426	0.0,0.0,0.65,0.0	0.491	0.491
14669	ENSMUSG00000028573.18	Fggy	chr4	+	95812107	95812169	95800556	95800664	95837584	95837659	14669	36,59,35,72	4,12,15,2	51,39,112,40	0,0,0,0	211	149	9.80971e-12	4.96025e-09	0.864,0.776,0.622,0.962	1.0,1.0,1.0,1.0	-0.194	0.194
14679	ENSMUSG00000087366.7	Junos	chr4	+	95062586	95062703	95053239	95053396	95065612	95065744	14679	4,4,0,4	0,1,1,0	2,4,2,2	1,0,2,2	266	149	0.0122243	0.172075	1.0,0.691,0.0,1.0	0.528,1.0,0.359,0.359	0.111	0.111
14698	ENSMUSG00000033767.14	Tmem131l	chr3	-	83940890	83940949	83940496	83940605	83942386	83942540	14698	39,34,26,55	2,5,4,0	42,33,47,55	0,0,0,0	208	149	0.000217921	0.0074139	0.933,0.83,0.823,1.0	1.0,1.0,1.0,1.0	-0.104	0.104
14758	ENSMUSG00000021139.17	Gm20498	chr12	-	81510828	81510965	81504543	81504639	81532715	81532877	14758	213159246131	33,18,31,20	195297123123	15,19,7,4	286	149	1.74529e-05	0.000993546	0.771,0.821,0.805,0.773	0.871,0.891,0.902,0.941	-0.109	0.109
14767	ENSMUSG00000061175.12	Fnip2	chr3	-	79515102	79515249	79512497	79512598	79518064	79518191	14767	28,25,27,22	0,0,0,3	38,10,30,27	0,3,5,0	296	149	0.0168505	0.219023	1.0,1.0,1.0,0.787	1.0,0.627,0.751,1.0	0.102	0.102
14775	ENSMUSG00000097571.9	Jpx	chrX	+	103502859	103502930	103496437	103496530	103509269	103510017	14775	3,1,3,3	0,0,5,0	1,1,2,0	0,3,2,5	220	149	8.36885e-05	0.00352974	1.0,1.0,0.289,1.0	1.0,0.184,0.404,0.0	0.425	0.425
14780	ENSMUSG00000026201.12	Stk16	chr1	+	75213112	75213228	75212885	75213006	75213575	75213697	14780	98,162,83,286	48,22,29,38	200176216168	14,14,21,8	265	149	3.78181e-06	0.000282682	0.534,0.805,0.617,0.809	0.889,0.876,0.853,0.922	-0.194	0.194
14781	ENSMUSG00000026201.12	Stk16	chr1	+	75213132	75213228	75212599	75213006	75213575	75213697	14781	217250138457	48,22,29,38	313334328240	14,14,21,8	245	149	4.75867e-08	8.23601e-06	0.733,0.874,0.743,0.88	0.931,0.936,0.905,0.948	-0.123	0.123
14888	ENSMUSG00000024764.10	Naa40	chr19	-	7229947	7230106	7229721	7229805	7230187	7230283	14888	52,40,23,46	8,0,3,2	36,54,52,74	0,0,0,0	298	149	1.55404e-06	0.000145729	0.765,1.0,0.793,0.92	1.0,1.0,1.0,1.0	-0.13	0.13
14891	ENSMUSG00000037326.10	Capn15	chr17	-	25960064	25960231	25959806	25959985	25960336	25960563	14891	13,17,31,25	0,0,3,0	13,15,25,28	1,3,3,1	298	149	0.00529656	0.0901568	1.0,1.0,0.838,1.0	0.867,0.714,0.806,0.933	0.129	0.129
14897	ENSMUSG00000030768.12	Disp1	chr1	-	183173495	183173623	183135354	183135876	183202951	183203039	14897	4,4,4,4	1,5,4,0	4,1,10,4	0,0,0,0	277	149	1.17449e-07	1.79218e-05	0.683,0.301,0.35,1.0	1.0,1.0,1.0,1.0	-0.416	0.416
14938	ENSMUSG00000043940.15	Wdfy3	chr5	-	101935989	101936073	101930827	101931005	101937281	101937739	14938	19,17,22,31	10,27,14,12	30,36,16,17	0,9,11,4	233	149	0.00702364	0.112522	0.549,0.287,0.501,0.623	1.0,0.719,0.482,0.731	-0.243	0.243
14971	ENSMUSG00000029454.15	Mapkapk5	chr5	-	121535674	121535943	121534406	121534430	121537111	121537184	14971	19,25,17,15	3,0,2,3	11,20,11,17	8,3,1,4	298	149	0.0465759	0.463387	0.76,1.0,0.81,0.714	0.407,0.769,0.846,0.68	0.146	0.146
14990	ENSMUSG00000038495.14	Otud7b	chr3	+	96108710	96108768	96104526	96104819	96136473	96136624	14990	0,0,0,4	21,30,20,18	4,3,0,3	18,25,23,0	207	149	0.0154852	0.205418	0.0,0.0,0.0,0.138	0.138,0.08,0.0,1.0	-0.27	0.27
14997	ENSMUSG00000060121.15	Gemin2	chr12	+	59020388	59020433	59018011	59018125	59025002	59025113	14997	12,15,23,1	0,7,1,0	8,15,5,5	0,0,0,0	194	149	0.00382124	0.0698384	1.0,0.622,0.946,1.0	1.0,1.0,1.0,1.0	-0.108	0.108
15058	ENSMUSG00000045205.16	Dpy19l4	chr4	-	11290390	11290522	11290190	11290289	11292553	11292688	15058	39,33,35,52	2,2,1,10	39,32,10,64	0,0,0,0	281	149	5.22969e-07	6.13015e-05	0.912,0.897,0.949,0.734	1.0,1.0,1.0,1.0	-0.127	0.127
15083	ENSMUSG00000110781.1	Gm31992	chr10	+	40165069	40165229	40164109	40164286	40167660	40167788	15083	16,3,18,25	0,0,0,0	16,2,40,29	4,3,0,0	298	149	0.00557437	0.0933454	1.0,1.0,1.0,1.0	0.667,0.25,1.0,1.0	0.271	0.271
15323	ENSMUSG00000044452.10	Zfp507	chr7	-	35787717	35787832	35773726	35776572	35791647	35791762	15323	30,49,31,26	2,2,4,4	25,15,24,17	0,0,0,0	264	149	6.98221e-06	0.000464065	0.894,0.933,0.814,0.786	1.0,1.0,1.0,1.0	-0.143	0.143
15364	ENSMUSG00000037730.13	Mynn	chr3	+	30612468	30612552	30611440	30611619	30613551	30613638	15364	14,27,4,21	17,13,3,14	22,13,26,13	0,0,13,1	233	149	4.77416e-05	0.00227151	0.345,0.57,0.46,0.49	1.0,1.0,0.561,0.893	-0.397	0.397
15375	ENSMUSG00000035443.10	Thyn1	chr9	+	27006800	27006951	27006351	27006447	27007157	27007334	15375	205,164,72,124	0,28,26,52	83,58,110,54	2,3,8,9	298	149	0.0331067	0.356623	1.0,0.745,0.581,0.544	0.954,0.906,0.873,0.75	-0.153	0.153
15380	ENSMUSG00000022378.14	Fam49b	chr15	-	63956599	63956682	63950005	63950127	63970929	63970968	15380	25,58,42,40	11,9,11,3	14,27,15,19	2,5,0,0	232	149	0.0155574	0.206163	0.593,0.805,0.71,0.895	0.818,0.776,1.0,1.0	-0.148	0.148
15382	ENSMUSG00000022378.14	Fam49b	chr15	-	63957584	63957667	63950005	63950127	63970929	63970968	15382	7,3,1,3	11,9,11,3	1,0,15,6	2,5,0,0	232	149	0.0333812	0.359166	0.29,0.176,0.055,0.391	0.243,0.0,1.0,1.0	-0.333	0.333
15387	ENSMUSG00000022378.14	Fam49b	chr15	-	64022569	64022620	63970929	63970968	64060194	64060330	15387	35,61,51,21	1,0,3,0	15,33,22,16	4,0,0,6	200	149	0.00487133	0.0848223	0.963,1.0,0.927,1.0	0.736,1.0,1.0,0.665	0.122	0.122
15411	ENSMUSG00000026767.12	Mindy3	chr2	-	12403997	12404166	12401024	12401076	12405859	12405920	15411	60,35,30,85	8,3,8,6	58,38,66,44	3,3,0,0	298	149	9.02653e-05	0.00374841	0.789,0.854,0.652,0.876	0.906,0.864,1.0,1.0	-0.15	0.15
15429	ENSMUSG00000043323.17	Fbrsl1	chr5	-	110381600	110381646	110379268	110379593	110386900	110386962	15429	7,11,11,18	1,0,3,5	29,16,28,15	0,0,1,0	195	149	8.12574e-05	0.00346358	0.842,1.0,0.737,0.733	1.0,1.0,0.955,1.0	-0.161	0.161
15430	ENSMUSG00000043323.17	Fbrsl1	chr5	-	110381600	110381646	110379268	110379593	110396044	110396074	15430	17,28,38,43	11,2,1,9	56,46,71,26	0,4,1,3	195	149	0.000817786	0.0209425	0.541,0.915,0.967,0.785	1.0,0.898,0.982,0.869	-0.135	0.135
15431	ENSMUSG00000043323.17	Fbrsl1	chr5	-	110381600	110381646	110379268	110379593	110416029	110416065	15431	7,8,14,19	5,6,0,1	29,15,28,14	0,0,0,0	195	149	1.58521e-06	0.000146423	0.517,0.505,1.0,0.936	1.0,1.0,1.0,1.0	-0.26	0.26
15483	ENSMUSG00000074305.9	Peak1	chr9	-	56374375	56374439	56318662	56318820	56417940	56418042	15483	8,8,16,14	1,0,2,0	20,5,6,0	1,0,0,9	213	149	0.0447099	0.449504	0.848,1.0,0.848,1.0	0.933,1.0,1.0,0.0	0.191	0.191
15487	ENSMUSG00000002602.16	Axl	chr7	-	25773342	25773493	25770632	25770765	25774514	25774725	15487	16,27,7,33	4,5,0,0	13,7,19,4	0,0,0,0	298	149	0.000175353	0.00627184	0.667,0.73,1.0,1.0	1.0,1.0,1.0,1.0	-0.151	0.151
15488	ENSMUSG00000002602.16	Axl	chr7	-	25773342	25773493	25773098	25773125	25774514	25774725	15488	60,100,55,124	17,31,17,11	39,40,49,36	3,5,2,9	298	149	0.0222952	0.267951	0.638,0.617,0.618,0.849	0.867,0.8,0.925,0.667	-0.134	0.134
15515	ENSMUSG00000022772.12	Senp5	chr16	-	31977598	31977757	31968799	31968937	31983263	31983311	15515	12,8,5,8	2,1,0,5	15,11,9,9	0,0,0,4	298	149	0.0125272	0.17526	0.75,0.8,1.0,0.444	1.0,1.0,1.0,0.529	-0.134	0.134
15530	ENSMUSG00000075324.13	Fign	chr2	-	64096894	64097064	64027909	64027967	64097841	64098012	15530	2,9,6,3	0,0,0,1	7,1,1,3	0,0,7,0	298	149	0.045498	0.455121	1.0,1.0,1.0,0.6	1.0,1.0,0.067,1.0	0.133	0.133
15564	ENSMUSG00000063889.16	Crem	chr18	-	3276693	3276729	3273421	3273578	3287903	3288092	15564	9,24,11,31	5,1,6,12	27,19,16,6	0,0,0,0	185	149	5.33941e-10	1.8359e-07	0.592,0.951,0.596,0.675	1.0,1.0,1.0,1.0	-0.296	0.296
15569	ENSMUSG00000063889.16	Crem	chr18	-	3276693	3276775	3273421	3273578	3295039	3295182	15569	7,19,11,31	1,2,2,1	24,14,17,2	0,1,0,0	231	149	0.0290953	0.323932	0.819,0.86,0.78,0.952	1.0,0.9,1.0,1.0	-0.122	0.122
15622	ENSMUSG00000041966.18	Dcaf17	chr2	+	71078473	71078579	71078059	71078164	71081910	71082053	15622	22,25,15,37	1,0,0,0	25,35,34,46	3,4,1,3	255	149	0.000151296	0.00562505	0.928,1.0,1.0,1.0	0.83,0.836,0.952,0.9	0.103	0.103
15695	ENSMUSG00000026643.16	Nmt2	chr2	+	3305396	3305439	3304811	3304947	3309466	3309611	15695	13,3,13,1	9,7,6,1	6,10,2,4	2,0,3,0	192	149	0.00804426	0.125415	0.529,0.25,0.627,0.437	0.7,1.0,0.341,1.0	-0.299	0.299
15734	ENSMUSG00000026074.15	Map4k4	chr1	+	40003756	40003987	40000530	40000749	40004806	40004913	15734	27,34,28,35	99,92,66,85	0,3,5,2	27,38,27,26	298	149	3.18308e-08	5.89375e-06	0.12,0.156,0.175,0.171	0.0,0.038,0.085,0.037	0.115	0.115
15756	ENSMUSG00000026743.16	Mllt10	chr2	+	18101457	18101512	18071124	18071204	18109781	18109891	15756	3,29,17,12	0,6,8,19	26,19,19,15	0,0,7,0	204	149	0.0016659	0.0363421	1.0,0.779,0.608,0.316	1.0,1.0,0.665,1.0	-0.241	0.241
15774	ENSMUSG00000038975.14	Rabggtb	chr3	-	153910063	153910161	153909545	153909598	153910260	153910303	15774	82,108,100,91	85,80,108,135	62,58,53,53	85143164112	247	149	6.60618e-06	0.000443646	0.368,0.449,0.358,0.289	0.306,0.197,0.163,0.222	0.144	0.144
15793	ENSMUSG00000068922.14	Msto1	chr3	-	88910129	88910239	88909614	88909910	88910313	88910418	15793	22,61,31,48	6,3,5,2	46,51,29,38	1,0,0,1	259	149	3.66979e-06	0.000278343	0.678,0.921,0.781,0.932	0.964,1.0,1.0,0.956	-0.152	0.152
15877	ENSMUSG00000015149.14	Sirt2	chr7	+	28767631	28767678	28766766	28766867	28771810	28771859	15877	54,31,49,41	40,37,33,47	31,22,55,29	40,42,104,50	196	149	0.000726082	0.0190287	0.506,0.389,0.53,0.399	0.371,0.285,0.287,0.306	0.144	0.144
15904	ENSMUSG00000041890.17	Git2	chr5	-	114743730	114743880	114739032	114739281	114745428	114745571	15904	10,19,8,14	4,12,16,18	14,8,3,8	13,23,29,18	298	149	0.0114688	0.165014	0.556,0.442,0.2,0.28	0.35,0.148,0.049,0.182	0.187	0.187
15905	ENSMUSG00000041890.17	Git2	chr5	-	114743775	114743880	114739032	114739281	114745428	114745571	15905	3,6,9,1	4,12,16,18	6,2,0,1	13,23,29,18	254	149	0.00373796	0.0687052	0.306,0.227,0.248,0.032	0.213,0.049,0.0,0.032	0.13	0.13
15972	ENSMUSG00000021488.8	Nsd1	chr13	+	55277273	55277427	55276522	55276641	55277531	55277590	15972	3,2,6,18	31,35,50,21	11,5,23,6	18,23,6,12	298	149	0.00651227	0.105706	0.046,0.028,0.057,0.3	0.234,0.098,0.657,0.2	-0.19	0.19
16058	ENSMUSG00000028037.13	Ifi44	chr3	-	151738222	151738323	151730921	151732553	151739319	151739491	16058	14,12,7,19	2,0,0,0	22,7,14,15	2,5,1,0	250	149	0.00247581	0.0499685	0.807,1.0,1.0,1.0	0.868,0.455,0.893,1.0	0.148	0.148
16097	ENSMUSG00000026927.17	Entr1	chr2	-	26388491	26388560	26386654	26387671	26389148	26389283	16097	35,20,7,40	33,40,38,30	14,11,20,9	22,24,87,29	218	149	0.0490614	0.481429	0.42,0.255,0.112,0.477	0.303,0.239,0.136,0.175	0.103	0.103
16105	ENSMUSG00000090272.9	Mndal	chr1	-	173865398	173865557	173862460	173862883	173871377	173871545	16105	67,89,38,82	0,0,0,1	41,56,53,0	0,0,3,4	298	149	0.00913361	0.138147	1.0,1.0,1.0,0.976	1.0,1.0,0.898,0.0	0.269	0.269
16161	ENSMUSG00000002885.14	Adgre5	chr8	-	83730110	83730257	83729381	83729525	83733413	83733566	16161	88,195,73,139	18,41,13,38	48,58,61,46	31,14,17,24	296	149	0.0127014	0.177093	0.711,0.705,0.739,0.648	0.438,0.676,0.644,0.491	0.138	0.138
16162	ENSMUSG00000002885.14	Adgre5	chr8	-	83731902	83732037	83729381	83729525	83733413	83733566	16162	18,31,17,34	18,41,13,38	4,5,19,7	31,14,17,24	284	149	0.00309612	0.0596287	0.344,0.284,0.407,0.319	0.063,0.158,0.37,0.133	0.157	0.157
16201	ENSMUSG00000056492.6	Adgrf5	chr17	+	43439675	43439795	43437515	43437686	43439950	43440160	16201	28,39,37,40	17,37,45,14	35,37,30,24	14,10,17,9	269	149	0.0311729	0.341354	0.477,0.369,0.313,0.613	0.581,0.672,0.494,0.596	-0.143	0.143
16234	ENSMUSG00000035248.9	Tut7	chr13	-	59779136	59779201	59778751	59778815	59782017	59782343	16234	35,8,2,31	0,7,6,8	29,14,15,11	4,0,0,0	214	149	0.000182302	0.00649336	1.0,0.443,0.188,0.73	0.835,1.0,1.0,1.0	-0.369	0.369
16279	ENSMUSG00000087380.7	2210408F21Rik	chr6	+	31277847	31277955	31220350	31220519	31328288	31328360	16279	11,9,13,44	3,2,8,0	22,25,26,33	0,0,0,0	257	149	1.90907e-07	2.66823e-05	0.68,0.723,0.485,1.0	1.0,1.0,1.0,1.0	-0.278	0.278
16282	ENSMUSG00000087380.7	2210408F21Rik	chr6	+	31285002	31285120	31220404	31220519	31328288	31328300	16282	34,41,41,30	3,2,8,0	36,40,51,54	0,0,0,0	267	149	1.92092e-06	0.000169646	0.863,0.92,0.741,1.0	1.0,1.0,1.0,1.0	-0.119	0.119
16351	ENSMUSG00000052384.14	Nrros	chr16	-	32163252	32163397	32147552	32147673	32165379	32165594	16351	3,1,0,0	8,10,9,8	3,0,1,2	0,6,0,1	294	149	0.0283508	0.317902	0.16,0.048,0.0,0.0	1.0,0.0,1.0,0.503	-0.574	0.574
16365	ENSMUSG00000033902.12	Mapkbp1	chr2	+	120023542	120024139	120023031	120023315	120024517	120024603	16365	13,5,42,14	2,4,0,0	16,14,28,21	0,0,0,0	298	149	0.0236004	0.279049	0.765,0.385,1.0,1.0	1.0,1.0,1.0,1.0	-0.213	0.213
16384	ENSMUSG00000039987.15	Phtf2	chr5	-	20803184	20803350	20801901	20802066	20805654	20805813	16384	13,28,25,17	5,0,3,5	40,18,25,19	0,4,1,1	298	149	0.0247308	0.288709	0.565,1.0,0.806,0.63	1.0,0.692,0.926,0.905	-0.13	0.13
16385	ENSMUSG00000039987.15	Phtf2	chr5	-	20805654	20805813	20803184	20803350	20807403	20807473	16385	14,20,31,16	2,4,1,0	40,8,28,27	0,0,0,0	298	149	0.00732385	0.116801	0.778,0.714,0.939,1.0	1.0,1.0,1.0,1.0	-0.142	0.142
16412	ENSMUSG00000026240.12	Cops7b	chr1	+	86587015	86587235	86582903	86583096	86589163	86589341	16412	4,16,26,9	1,4,8,0	16,15,12,5	0,0,0,0	298	149	5.59203e-08	9.55016e-06	0.667,0.667,0.619,1.0	1.0,1.0,1.0,1.0	-0.262	0.262
16414	ENSMUSG00000026240.12	Cops7b	chr1	+	86589163	86589341	86582903	86583096	86592290	86592366	16414	19,37,33,45	1,0,0,0	13,21,19,13	0,0,3,7	298	149	0.000113739	0.00448485	0.905,1.0,1.0,1.0	1.0,1.0,0.76,0.481	0.166	0.166
16509	ENSMUSG00000026708.16	Cenpl	chr1	+	161079867	161080010	161078228	161078480	161082907	161083450	16509	4,0,2,4	0,16,9,1	8,16,4,0	1,2,0,1	292	149	0.00194069	0.0408876	1.0,0.0,0.102,0.671	0.803,0.803,1.0,0.0	-0.208	0.208
16531	ENSMUSG00000031671.11	Setd6	chr8	+	95716920	95717041	95716606	95716801	95718192	95718335	16531	30,19,21,32	0,2,5,8	24,20,59,16	0,1,0,1	270	149	4.37479e-06	0.000317821	1.0,0.84,0.699,0.688	1.0,0.917,1.0,0.898	-0.147	0.147
16538	ENSMUSG00000029217.16	Tec	chr5	-	72783717	72783774	72782002	72782175	72785916	72786020	16538	9,15,10,12	1,0,3,13	14,11,20,14	0,0,1,4	206	149	0.0116122	0.166528	0.867,1.0,0.707,0.4	1.0,1.0,0.935,0.717	-0.17	0.17
16601	ENSMUSG00000028086.15	Fbxw7	chr3	+	84864136	84864200	84863963	84864011	84903500	84904079	16601	13,17,12,9	1,0,6,12	3,3,14,4	9,1,18,6	213	149	0.00443993	0.078909	0.901,1.0,0.583,0.344	0.189,0.677,0.352,0.318	0.323	0.323
16648	ENSMUSG00000038902.14	Pogz	chr3	+	94864087	94864378	94862421	94862530	94864484	94864667	16648	18,7,11,30	0,7,3,0	9,1,9,16	0,0,0,0	298	149	0.000111841	0.00443672	1.0,0.333,0.647,1.0	1.0,1.0,1.0,1.0	-0.255	0.255
16665	ENSMUSG00000029647.15	Pan3	chr5	+	147503084	147503202	147488110	147488258	147519504	147519752	16665	8,0,2,7	18,11,14,16	5,4,18,9	13,9,9,13	267	149	0.0117876	0.168207	0.199,0.0,0.074,0.196	0.177,0.199,0.527,0.279	-0.178	0.178
16745	ENSMUSG00000055296.14	Tmem245	chr4	-	56903211	56903247	56899305	56899428	56903917	56904049	16745	6,2,2,6	8,10,6,17	22,20,24,13	12,18,5,10	185	149	5.58855e-05	0.00255528	0.377,0.139,0.212,0.221	0.596,0.472,0.794,0.511	-0.356	0.356
16765	ENSMUSG00000086938.9	4930481A15Rik	chr19	+	5415007	5415099	5406814	5407083	5415606	5415812	16765	14,20,7,19	10,13,2,0	22,15,24,24	5,0,4,0	241	149	0.018173	0.230418	0.464,0.487,0.684,1.0	0.731,1.0,0.788,1.0	-0.221	0.221
16766	ENSMUSG00000086938.9	4930481A15Rik	chr19	+	5415007	5415112	5406873	5407083	5415606	5415812	16766	38,45,24,53	10,13,2,0	55,30,64,59	5,0,4,0	254	149	0.00271836	0.0537173	0.69,0.67,0.876,1.0	0.866,1.0,0.904,1.0	-0.134	0.134
16767	ENSMUSG00000086938.9	4930481A15Rik	chr19	+	5415011	5415112	5406739	5407083	5415606	5415812	16767	29,30,14,32	10,13,2,0	39,22,48,40	5,0,4,0	250	149	0.00472432	0.0827655	0.633,0.579,0.807,1.0	0.823,1.0,0.877,1.0	-0.17	0.17
16897	ENSMUSG00000059588.13	Calcrl	chr2	-	84407518	84407586	84376964	84377045	84425069	84425411	16897	34,44,43,51	6,9,0,3	14,29,7,25	19,13,7,7	217	149	3.01814e-06	0.000240222	0.796,0.77,1.0,0.921	0.336,0.605,0.407,0.71	0.357	0.357
16944	ENSMUSG00000027111.16	Itga6	chr2	+	71853533	71853663	71849380	71849506	71855853	71856758	16944	7,12,9,6	2,4,3,5	1,13,1,4	0,1,0,2	279	149	0.000749751	0.0195496	0.651,0.616,0.616,0.391	1.0,0.874,1.0,0.516	-0.279	0.279
16948	ENSMUSG00000050530.14	Fam171a1	chr2	+	3223469	3223584	3220252	3220369	3224817	3227250	16948	13,4,13,3	0,6,0,3	7,14,5,1	2,0,0,0	264	149	0.0011776	0.0278605	1.0,0.273,1.0,0.361	0.664,1.0,1.0,1.0	-0.257	0.257
16991	ENSMUSG00000030924.16	Rexo5	chr7	+	119845382	119845501	119843864	119844064	119848731	119848939	16991	2,11,2,3	0,2,0,2	0,5,6,1	5,5,0,3	268	149	0.00193719	0.040855	1.0,0.754,1.0,0.455	0.0,0.357,1.0,0.156	0.424	0.424
17017	ENSMUSG00000004677.17	Myo9b	chr8	+	71336875	71336965	71334312	71334394	71338906	71339008	17017	15,11,12,17	8,23,4,19	12,29,11,15	2,0,9,2	239	149	0.0010901	0.0261991	0.539,0.23,0.652,0.358	0.789,1.0,0.432,0.824	-0.317	0.317
17020	ENSMUSG00000004677.17	Myo9b	chr8	+	71358615	71358663	71358112	71358236	71358962	71359093	17020	53,24,29,13	37,45,22,18	23,33,27,53	4,17,11,15	197	149	7.6538e-05	0.00330614	0.52,0.287,0.499,0.353	0.813,0.595,0.65,0.728	-0.282	0.282
17037	ENSMUSG00000021224.15	Numb	chr12	-	83855439	83855524	83842217	83842358	83876667	83876812	17037	53,96,88,93	25,30,15,21	102,83,108,67	3,9,12,15	234	149	0.00024593	0.00820446	0.574,0.671,0.789,0.738	0.956,0.854,0.851,0.74	-0.157	0.157
17065	ENSMUSG00000006476.19	Nsmf	chr2	+	25058228	25058321	25057146	25057176	25059020	25059073	17065	52,65,85,88	11,17,12,17	91,111,149,78	0,16,18,6	242	149	0.00145768	0.0328016	0.744,0.702,0.813,0.761	1.0,0.81,0.836,0.889	-0.129	0.129
17129	ENSMUSG00000055707.13	Klhl26	chr8	-	70455465	70455648	70450267	70453019	70475806	70475898	17129	15,6,22,4	1,5,0,0	12,13,7,13	0,0,0,0	298	149	0.0327815	0.353711	0.882,0.375,1.0,1.0	1.0,1.0,1.0,1.0	-0.186	0.186
17136	ENSMUSG00000032534.18	Cep63	chr9	-	102613294	102613417	102607325	102607439	102615274	102615370	17136	28,62,21,54	1,0,1,2	41,31,63,31	8,7,5,3	272	149	3.19888e-06	0.000249978	0.939,1.0,0.92,0.937	0.737,0.708,0.873,0.85	0.157	0.157
17140	ENSMUSG00000032534.18	Cep63	chr9	-	102621695	102621728	102619691	102619760	102623555	102623593	17140	5,2,3,3	0,0,0,0	2,2,6,1	0,2,4,0	182	149	0.0114732	0.165014	1.0,1.0,1.0,1.0	1.0,0.45,0.551,1.0	0.25	0.25
17254	ENSMUSG00000026409.14	Pfkfb2	chr1	-	130697016	130698085	130689182	130691148	130698678	130698743	17254	19,14,26,49	8,3,0,0	14,21,24,30	8,9,1,5	298	149	0.0498801	0.487547	0.543,0.7,1.0,1.0	0.467,0.538,0.923,0.75	0.141	0.141
17255	ENSMUSG00000026409.14	Pfkfb2	chr1	-	130697905	130698085	130691014	130691148	130698678	130698743	17255	19,14,27,51	8,3,0,0	14,21,22,30	8,9,1,5	298	149	0.0425774	0.43487	0.543,0.7,1.0,1.0	0.467,0.538,0.917,0.75	0.143	0.143
17258	ENSMUSG00000026409.14	Pfkfb2	chr1	-	130705376	130705501	130702230	130702438	130706425	130706482	17258	33,51,48,68	0,0,0,0	95,55,60,65	2,4,6,5	274	149	1.07598e-06	0.000110109	1.0,1.0,1.0,1.0	0.963,0.882,0.845,0.876	0.109	0.109
17320	ENSMUSG00000060470.7	Adgrg3	chr8	+	95034949	95035096	95033357	95033493	95035809	95035864	17320	16,3,37,26	0,4,3,0	24,55,56,34	0,0,0,0	296	149	0.00944638	0.141472	1.0,0.274,0.861,1.0	1.0,1.0,1.0,1.0	-0.216	0.216
17321	ENSMUSG00000060470.7	Adgrg3	chr8	+	95036206	95036328	95035809	95035944	95036440	95036480	17321	0,2,0,7	17,11,28,0	0,0,0,0	14,29,11,13	271	149	0.0239555	0.282471	0.0,0.091,0.0,1.0	0.0,0.0,0.0,0.0	0.273	0.273
17333	ENSMUSG00000004798.14	Ulk2	chr11	-	61783536	61783715	61782005	61782124	61787428	61787637	17333	78,76,25,68	4,2,7,0	99,95,60,64	1,0,0,0	298	149	3.89951e-05	0.00191314	0.907,0.95,0.641,1.0	0.98,1.0,1.0,1.0	-0.12	0.12
17345	ENSMUSG00000021557.15	Agtpbp1	chr13	-	59531056	59531203	59528386	59528518	59532012	59532076	17345	16,11,14,14	2,0,4,0	18,7,6,2	0,0,0,0	296	149	0.0461666	0.460203	0.801,1.0,0.638,1.0	1.0,1.0,1.0,1.0	-0.14	0.14
17379	ENSMUSG00000033009.15	Ogfod1	chr8	+	94038967	94039110	94037290	94037442	94047271	94047318	17379	3,4,12,11	0,0,0,1	10,16,14,2	1,0,3,2	292	149	0.0149926	0.200534	1.0,1.0,1.0,0.849	0.836,1.0,0.704,0.338	0.243	0.243
17460	ENSMUSG00000040025.17	Ythdf2	chr4	-	132204131	132205715	132184911	132186947	132210751	132210831	17460	116130130159	15,24,8,11	143,84,107,122	8,0,5,3	298	149	3.06039e-05	0.00157214	0.795,0.73,0.89,0.878	0.899,1.0,0.915,0.953	-0.118	0.118
17461	ENSMUSG00000040025.17	Ythdf2	chr4	-	132205513	132205715	132186687	132186947	132210751	132210809	17461	36,68,74,83	15,24,8,11	81,42,65,66	8,0,5,3	298	149	8.50537e-05	0.00356645	0.545,0.586,0.822,0.79	0.835,1.0,0.867,0.917	-0.219	0.219
17501	ENSMUSG00000021671.9	Poc5	chr13	+	96390222	96390362	96388293	96388531	96391587	96391675	17501	17,26,18,8	0,0,0,0	7,14,1,12	2,7,2,1	289	149	2.08267e-08	4.19593e-06	1.0,1.0,1.0,1.0	0.643,0.508,0.205,0.861	0.446	0.446
17509	ENSMUSG00000035439.13	Haus8	chr8	-	71269225	71269284	71263051	71263104	71272283	71272358	17509	25,36,10,15	5,0,0,4	11,9,10,4	0,0,0,0	208	149	0.000857172	0.0217566	0.782,1.0,1.0,0.729	1.0,1.0,1.0,1.0	-0.122	0.122
17538	ENSMUSG00000026659.13	Dusp12	chr1	-	170880914	170881028	170880129	170880226	170885066	170885199	17538	16,51,27,29	2,2,6,0	41,37,47,34	1,0,0,0	263	149	0.000210375	0.00722466	0.819,0.935,0.718,1.0	0.959,1.0,1.0,1.0	-0.122	0.122
17539	ENSMUSG00000026659.13	Dusp12	chr1	-	170880914	170881041	170880129	170880226	170885066	170885396	17539	15,17,13,26	2,2,6,0	14,14,32,22	1,0,0,0	276	149	1.10657e-05	0.000676213	0.802,0.821,0.539,1.0	0.883,1.0,1.0,1.0	-0.18	0.18
17546	ENSMUSG00000025915.14	Sgk3	chr1	+	9827012	9827119	9798142	9798246	9865130	9865348	17546	9,23,22,3	14,18,12,13	18,14,14,6	0,8,4,8	256	149	0.0251844	0.292304	0.272,0.427,0.516,0.118	1.0,0.505,0.671,0.304	-0.287	0.287
17598	ENSMUSG00000031605.8	Klhl2	chr8	-	64798360	64798459	64779697	64779860	64811679	64811801	17598	3,7,3,7	20,25,19,38	33,26,10,22	29,27,38,46	248	149	6.24266e-05	0.00278522	0.083,0.144,0.087,0.1	0.406,0.367,0.137,0.223	-0.18	0.18
17601	ENSMUSG00000078861.8	Zfp931	chr2	-	178069554	178069615	178067694	178068400	178069822	178069949	17601	0,1,0,3	1,2,2,3	1,5,1,6	3,0,0,0	210	149	1.64386e-06	0.000149794	0.0,0.262,0.0,0.415	0.191,1.0,1.0,1.0	-0.628	0.628
17663	ENSMUSG00000017868.16	Sgk2	chr2	+	162999181	162999268	162998229	162998266	163003271	163003367	17663	186165185152	44,53,68,29	89,205,78,87	20,21,6,3	236	149	8.39297e-06	0.000542439	0.727,0.663,0.632,0.768	0.738,0.86,0.891,0.948	-0.162	0.162
17700	ENSMUSG00000035969.15	Rusc2	chr4	+	43413004	43413054	43382056	43382199	43414627	43414755	17700	14,1,19,0	13,9,0,3	0,7,2,0	3,21,25,13	199	149	0.0214565	0.261	0.446,0.077,1.0,0.0	0.0,0.2,0.057,0.0	0.317	0.317
17775	ENSMUSG00000026924.17	Sec16a	chr2	-	26413678	26413738	26412835	26412913	26414370	26414445	17775	50,35,37,29	78,50,57,79	55,45,58,49	29,56,44,29	209	149	4.40948e-05	0.00212943	0.314,0.333,0.316,0.207	0.575,0.364,0.484,0.546	-0.2	0.2
17788	ENSMUSG00000038260.10	Trpm4	chr7	-	45327720	45327895	45327271	45327452	45333381	45333452	17788	43,23,39,46	1,3,5,2	15,44,21,26	6,5,8,4	298	149	0.00369974	0.0682956	0.956,0.793,0.796,0.92	0.556,0.815,0.568,0.765	0.19	0.19
17809	ENSMUSG00000038866.15	Zcchc2	chr1	+	106018218	106018302	106015998	106016093	106019847	106019905	17809	19,55,21,53	5,21,15,11	73,27,49,64	11,2,4,4	233	149	3.4289e-05	0.00171365	0.708,0.626,0.472,0.755	0.809,0.896,0.887,0.911	-0.236	0.236
17815	ENSMUSG00000026027.13	Stradb	chr1	+	58976958	58977065	58973521	58973850	58979933	58980014	17815	193257105232	18,11,20,12	193152186138	0,3,4,2	256	149	1.4925e-09	4.37371e-07	0.862,0.931,0.753,0.918	1.0,0.967,0.964,0.976	-0.111	0.111
17818	ENSMUSG00000026027.13	Stradb	chr1	+	58992203	58992375	58991012	58991136	58992650	58992755	17818	100,88,77,121	30,21,18,21	123,80,105,103	9,6,0,3	298	149	1.51155e-11	7.21847e-09	0.625,0.677,0.681,0.742	0.872,0.87,1.0,0.945	-0.24	0.24
17841	ENSMUSG00000027944.13	Hax1	chr3	-	89997386	89997574	89996246	89996298	89997801	89998003	17841	157204117379	17,17,21,6	208184445224	4,1,8,4	298	149	1.04124e-08	2.46345e-06	0.822,0.857,0.736,0.969	0.963,0.989,0.965,0.966	-0.125	0.125
17878	ENSMUSG00000020620.14	Abca8b	chr11	-	109934722	109934778	109932189	109934611	109935715	109935795	17878	83,70,38,71	18,4,7,19	132,104,67,86	0,6,0,4	205	149	7.4372e-10	2.45885e-07	0.77,0.927,0.798,0.731	1.0,0.926,1.0,0.94	-0.16	0.16
17888	ENSMUSG00000020620.14	Abca8b	chr11	-	109974507	109974693	109973670	109973818	109976436	109976663	17888	52,57,25,41	2,6,4,13	99,60,38,73	1,4,7,0	298	149	0.0053792	0.0910228	0.929,0.826,0.758,0.612	0.98,0.882,0.731,1.0	-0.117	0.117
17889	ENSMUSG00000020620.14	Abca8b	chr11	-	109974989	109975131	109973670	109973818	109976436	109976663	17889	47,31,24,42	2,6,4,13	39,30,59,48	1,4,7,0	291	149	0.0144898	0.195328	0.923,0.726,0.754,0.623	0.952,0.793,0.812,1.0	-0.133	0.133
17941	ENSMUSG00000072294.5	Klf12	chr14	-	100149731	100149795	100109770	100109860	100284530	100284679	17941	7,25,9,22	4,4,0,0	51,8,31,29	0,0,4,0	213	149	0.0066314	0.107327	0.55,0.814,1.0,1.0	1.0,1.0,0.844,1.0	-0.12	0.12
18028	ENSMUSG00000033852.16	Gm28042	chr2	+	120031501	120031651	120031306	120031402	120031840	120032000	18028	8,15,9,11	7,5,0,6	5,11,6,10	0,0,1,0	298	149	3.17039e-07	4.00774e-05	0.364,0.6,1.0,0.478	1.0,1.0,0.75,1.0	-0.327	0.327
18095	ENSMUSG00000026649.14	Cfap126	chr1	+	171123045	171123193	171113988	171114096	171125033	171125096	18095	0,5,2,7	2,0,4,0	9,4,2,11	0,1,0,0	297	149	0.00214921	0.044585	0.0,1.0,0.201,1.0	1.0,0.667,1.0,1.0	-0.366	0.366
18156	ENSMUSG00000044037.15	Als2cl	chr9	+	110894295	110894392	110893986	110894160	110894565	110894723	18156	57,70,60,41	8,18,26,26	43,57,32,16	0,11,0,11	246	149	0.0148104	0.198405	0.812,0.702,0.583,0.489	1.0,0.758,1.0,0.468	-0.16	0.16
18193	ENSMUSG00000028676.17	Srsf10	chr4	+	135863525	135863576	135863039	135863202	135867125	135868382	18193	16,41,28,31	8,6,1,5	23,19,29,28	0,1,3,0	200	149	9.10429e-05	0.00377374	0.598,0.836,0.954,0.822	1.0,0.934,0.878,1.0	-0.151	0.151
18212	ENSMUSG00000038074.16	Fkbp14	chr6	-	54586995	54587085	54585802	54585930	54589272	54589424	18212	2,10,9,22	6,10,5,6	19,13,14,8	3,4,6,3	239	149	0.0480017	0.474532	0.172,0.384,0.529,0.696	0.798,0.67,0.593,0.624	-0.226	0.226
18214	ENSMUSG00000073771.11	Btbd19	chr4	-	117120970	117121096	117120174	117120861	117121197	117121329	18214	1,2,2,18	0,0,0,0	2,2,0,6	0,0,4,4	275	149	0.000206073	0.00713012	1.0,1.0,1.0,1.0	1.0,1.0,0.0,0.448	0.388	0.388
18221	ENSMUSG00000101517.6	4732465J04Rik	chr10	+	95783727	95783983	95780508	95780626	95791683	95791732	18221	17,15,0,60	0,0,8,0	13,0,4,0	35,26,25,24	298	149	6.15746e-09	1.54164e-06	1.0,1.0,0.0,1.0	0.157,0.0,0.074,0.0	0.692	0.692
18222	ENSMUSG00000101517.6	4732465J04Rik	chr10	+	95791683	95791732	95780508	95780626	95794805	95796831	18222	17,6,15,41	20,6,7,4	62,40,45,39	2,8,2,6	198	149	0.000218596	0.00742709	0.39,0.429,0.617,0.885	0.959,0.79,0.944,0.83	-0.301	0.301
18242	ENSMUSG00000027198.16	Ext2	chr2	-	93820029	93820149	93813398	93813964	93821609	93821681	18242	4,0,1,5	3,6,8,9	0,0,3,0	5,20,6,6	269	149	0.000635621	0.017236	0.425,0.0,0.065,0.235	0.0,0.0,0.217,0.0	0.127	0.127
18270	ENSMUSG00000032712.16	Resf1	chr6	+	149317634	149317708	149310321	149310377	149325404	149328977	18270	18,14,9,16	15,16,0,1	10,6,9,13	4,0,0,0	223	149	0.00257189	0.0513342	0.445,0.369,1.0,0.914	0.626,1.0,1.0,1.0	-0.224	0.224
18302	ENSMUSG00000050619.14	Zscan29	chr2	-	121169198	121169403	121166043	121166718	121169809	121170268	18302	19,22,13,29	8,0,8,5	25,39,26,28	6,0,3,0	298	149	0.0204981	0.252559	0.543,1.0,0.448,0.744	0.676,1.0,0.813,1.0	-0.188	0.188
18375	ENSMUSG00000036053.17	Fmnl2	chr2	+	53130411	53130458	53126852	53126976	53131839	53133804	18375	12,9,3,11	7,2,14,1	6,14,13,9	2,0,4,0	196	149	0.00893487	0.136017	0.566,0.774,0.14,0.893	0.695,1.0,0.712,1.0	-0.258	0.258
18376	ENSMUSG00000036053.17	Fmnl2	chr2	+	53130411	53130505	53126852	53126976	53131839	53133804	18376	10,5,0,30	7,2,14,1	11,10,6,11	2,0,4,0	243	149	0.016082	0.210949	0.467,0.605,0.0,0.948	0.771,1.0,0.479,1.0	-0.307	0.307
18510	ENSMUSG00000034480.18	Diaph2	chrX	+	129801394	129801427	129749741	129750116	129804012	129804189	18510	20,14,7,5	12,4,0,0	0,20,11,0	6,4,2,5	182	149	0.017247	0.22294	0.577,0.741,1.0,1.0	0.0,0.804,0.818,0.0	0.424	0.424
18511	ENSMUSG00000034480.18	Diaph2	chrX	+	129825926	129825947	129821238	129821343	129902899	129903039	18511	14,8,9,8	6,11,3,10	10,12,9,17	1,5,8,0	170	149	0.025857	0.297596	0.672,0.389,0.724,0.412	0.898,0.678,0.496,1.0	-0.219	0.219
18517	ENSMUSG00000040297.12	Suco	chr1	-	161845559	161845580	161845302	161845358	161847204	161847310	18517	4,7,16,3	14,15,19,14	0,0,0,0	31,9,11,12	170	149	1.32926e-11	6.5921e-09	0.2,0.29,0.425,0.158	0.0,0.0,0.0,0.0	0.268	0.268
18531	ENSMUSG00000051682.15	Treml4	chr17	+	48272688	48272818	48269681	48269766	48274379	48274493	18531	45,105,40,58	0,2,3,0	10,26,27,21	7,0,0,3	279	149	0.0064642	0.105107	1.0,0.966,0.877,1.0	0.433,1.0,1.0,0.789	0.155	0.155
18596	ENSMUSG00000073490.11	Ifi207	chr1	-	173735095	173735313	173732274	173732442	173741587	173741747	18596	7,0,19,12	4,4,0,2	1,10,12,8	4,0,0,0	298	149	0.0145748	0.195859	0.467,0.0,1.0,0.75	0.111,1.0,1.0,1.0	-0.223	0.223
18655	ENSMUSG00000006014.16	Prg4	chr1	-	150457487	150457607	150454051	150456337	150458148	150458292	18655	6,5,19,11	1,10,26,13	0,0,3,0	3,5,28,7	269	149	3.90874e-08	6.95163e-06	0.769,0.217,0.288,0.319	0.0,0.0,0.056,0.0	0.384	0.384
18685	ENSMUSG00000090394.8	4930523C07Rik	chr1	+	160070699	160070803	160044383	160044753	160075030	160080208	18685	35,68,38,63	0,9,5,3	44,32,53,67	5,8,6,14	253	149	0.0214098	0.260626	1.0,0.817,0.817,0.925	0.838,0.702,0.839,0.738	0.111	0.111
18753	ENSMUSG00000040123.17	Zmym5	chr14	-	56810540	56810596	56804414	56804863	56810739	56810859	18753	3,4,3,0	8,7,8,8	0,0,0,4	4,9,16,10	205	149	0.00198944	0.0417441	0.214,0.293,0.214,0.0	0.0,0.0,0.0,0.225	0.124	0.124
18773	ENSMUSG00000037904.14	Ankrd9	chr12	-	110977663	110977770	110976428	110977548	110977947	110978127	18773	5,4,2,3	5,2,6,3	1,0,0,0	2,6,2,1	256	149	9.35776e-07	9.72874e-05	0.368,0.538,0.162,0.368	0.225,0.0,0.0,0.0	0.303	0.303
18786	ENSMUSG00000041161.8	Otud3	chr4	-	138905156	138905269	138901851	138901974	138909481	138909630	18786	29,27,28,59	0,3,0,0	25,22,19,16	0,9,5,1	262	149	1.53872e-05	0.000895722	1.0,0.837,1.0,1.0	1.0,0.582,0.684,0.901	0.167	0.167
18829	ENSMUSG00000040612.13	Ildr2	chr1	+	166294590	166294737	166270498	166270618	166303501	166303615	18829	6,0,5,4	3,7,4,1	3,10,5,6	1,1,5,0	296	149	0.0220978	0.266538	0.502,0.0,0.386,0.668	0.602,0.834,0.335,1.0	-0.304	0.304
18865	ENSMUSG00000075040.9	Zfp408	chr2	-	91648935	91649026	91648015	91648077	91649150	91649425	18865	1,0,2,3	8,7,1,2	4,2,3,4	4,2,5,0	240	149	0.0324165	0.3508	0.072,0.0,0.554,0.482	0.383,0.383,0.271,1.0	-0.232	0.232
18875	ENSMUSG00000027751.13	Supt20	chr3	+	54715156	54715256	54714687	54714796	54715533	54715689	18875	23,22,7,14	1,0,8,0	18,23,18,17	0,0,0,0	249	149	0.00762632	0.120286	0.932,1.0,0.344,1.0	1.0,1.0,1.0,1.0	-0.181	0.181
18912	ENSMUSG00000028034.15	Fubp1	chr3	+	152214824	152214887	152213976	152214067	152215591	152215630	18912	50,65,29,8	33,51,17,38	14,13,16,5	27,40,17,25	212	149	0.0284194	0.318228	0.516,0.473,0.545,0.129	0.267,0.186,0.398,0.123	0.172	0.172
18917	ENSMUSG00000026761.12	Orc4	chr2	-	48909265	48909333	48902823	48905599	48909418	48909514	18917	24,60,23,53	3,0,11,0	22,14,22,42	0,1,0,0	217	149	0.000160286	0.00582996	0.846,1.0,0.589,1.0	1.0,0.906,1.0,1.0	-0.118	0.118
18949	ENSMUSG00000029406.15	Pitpnm2	chr5	-	124126354	124126504	124125298	124125463	124127176	124127347	18949	29,20,14,18	24,14,6,22	5,15,20,22	22,37,31,17	298	149	0.0107458	0.157004	0.377,0.417,0.538,0.29	0.102,0.169,0.244,0.393	0.179	0.179
18966	ENSMUSG00000024331.11	Dsc2	chr18	-	20032489	20032535	20030632	20032403	20033061	20033322	18966	31,19,38,30	101,100,47,78	14,18,2,7	85,89,37,51	195	149	0.00027181	0.00885029	0.19,0.127,0.382,0.227	0.112,0.134,0.04,0.095	0.136	0.136
19098	ENSMUSG00000028019.9	Pdgfc	chr3	+	81131017	81131076	81037171	81037554	81141404	81141600	19098	6,4,3,8	20,20,14,6	1,1,0,0	0,0,5,4	208	149	0.011793	0.168207	0.177,0.125,0.133,0.489	1.0,1.0,0.0,0.0	-0.269	0.269
19136	ENSMUSG00000036948.17	Map11	chr5	-	138262846	138262976	138262169	138262744	138263066	138263162	19136	24,55,32,48	6,3,1,0	11,61,29,26	0,0,0,0	279	149	0.000465113	0.0135376	0.681,0.907,0.945,1.0	1.0,1.0,1.0,1.0	-0.117	0.117
19176	ENSMUSG00000031631.15	Cfap97	chr8	+	46164761	46164896	46163714	46163863	46169558	46170440	19176	0,0,8,1	10,5,0,2	6,2,3,10	6,3,0,0	284	149	0.00350967	0.0656326	0.0,0.0,1.0,0.208	0.344,0.259,1.0,1.0	-0.349	0.349
19183	ENSMUSG00000039361.11	Picalm	chr7	+	90182218	90182368	90177499	90177603	90189149	90189257	19183	476512286340	180236185310	266179143128	259191285191	298	149	6.08628e-07	6.91423e-05	0.569,0.52,0.436,0.354	0.339,0.319,0.201,0.251	0.192	0.192
19190	ENSMUSG00000098789.7	Jmjd7	chr2	+	120031574	120031651	120031306	120031402	120031840	120032000	19190	7,21,18,9	7,5,0,6	10,15,5,12	0,0,1,0	226	149	5.77057e-07	6.61385e-05	0.397,0.735,1.0,0.497	1.0,1.0,0.767,1.0	-0.284	0.284
19215	ENSMUSG00000055436.18	Srsf11	chr3	-	158024697	158024761	158023408	158024231	158026724	158026858	19215	1,0,0,2	15,11,9,5	0,5,8,1	5,0,1,2	213	149	4.85259e-05	0.00229612	0.045,0.0,0.0,0.219	0.0,1.0,0.848,0.259	-0.461	0.461
19292	ENSMUSG00000022568.17	Scrib	chr15	-	76049456	76049540	76049202	76049301	76050049	76050112	19292	14,5,11,4	34,21,15,34	19,24,16,5	18,34,22,9	233	149	0.00337289	0.0634891	0.208,0.132,0.319,0.07	0.403,0.311,0.317,0.262	-0.141	0.141
19311	ENSMUSG00000021392.8	Nol8	chr13	+	49653528	49653682	49653349	49653397	49654346	49654502	19311	14,13,26,10	3,6,0,0	21,18,9,10	0,0,0,0	298	149	0.000114025	0.00448928	0.7,0.52,1.0,1.0	1.0,1.0,1.0,1.0	-0.195	0.195
19328	ENSMUSG00000042608.15	Stk40	chr4	+	126117463	126117750	126103956	126104146	126118273	126118340	19328	6,6,11,12	3,5,3,2	0,0,0,1	8,14,5,10	298	149	3.21965e-15	3.19339e-12	0.5,0.375,0.647,0.75	0.0,0.0,0.0,0.048	0.556	0.556
19334	ENSMUSG00000020290.14	Xpo1	chr11	+	23268848	23268912	23267661	23268690	23271132	23271205	19334	1,3,7,0	0,1,1,6	0,0,0,1	5,4,1,7	213	149	2.75072e-05	0.00143594	1.0,0.677,0.83,0.0	0.0,0.0,0.0,0.091	0.604	0.604
19353	ENSMUSG00000020246.13	Hcfc2	chr10	+	82702442	82702603	82700918	82701067	82709963	82710048	19353	19,13,13,13	0,6,2,0	9,6,2,2	0,0,0,0	298	149	0.000831795	0.0212379	1.0,0.52,0.765,1.0	1.0,1.0,1.0,1.0	-0.179	0.179
19367	ENSMUSG00000051984.13	Sec31b	chr19	-	44526215	44526315	44525475	44525654	44526604	44526703	19367	6,2,12,7	0,0,0,1	10,23,4,9	1,2,6,0	249	149	0.000555473	0.0155169	1.0,1.0,1.0,0.807	0.857,0.873,0.285,1.0	0.198	0.198
19433	ENSMUSG00000036825.12	Ssx2ip	chr3	+	146414695	146414799	146404685	146404935	146417606	146417790	19433	0,0,0,0	16,17,11,1	2,4,8,0	5,7,20,1	253	149	2.84112e-07	3.66334e-05	0.0,0.0,0.0,0.0	0.191,0.252,0.191,0.0	-0.159	0.159
19607	ENSMUSG00000023206.16	Il15ra	chr2	+	11720012	11720105	11718263	11718458	11723412	11723610	19607	35,47,71,57	5,22,6,13	66,62,56,65	1,0,2,8	242	149	6.71897e-06	0.000449622	0.812,0.568,0.879,0.73	0.976,1.0,0.945,0.833	-0.191	0.191
19611	ENSMUSG00000023206.16	Il15ra	chr2	+	11723412	11723610	11720012	11720105	11724095	11724128	19611	88,62,87,73	0,7,8,8	98,72,108,81	3,0,0,0	298	149	2.04229e-07	2.81639e-05	1.0,0.816,0.845,0.82	0.942,1.0,1.0,1.0	-0.115	0.115
19612	ENSMUSG00000023206.16	Il15ra	chr2	+	11723511	11723610	11720012	11720105	11724095	11724128	19612	43,33,25,39	0,7,8,8	39,26,65,37	3,0,0,0	248	149	2.73706e-07	3.60516e-05	1.0,0.739,0.652,0.745	0.886,1.0,1.0,1.0	-0.188	0.188
19613	ENSMUSG00000023206.16	Il15ra	chr2	+	11724095	11724128	11718263	11718458	11730570	11730646	19613	14,30,16,31	4,1,0,9	23,9,32,14	0,0,0,0	182	149	2.34372e-06	0.000198163	0.741,0.961,1.0,0.738	1.0,1.0,1.0,1.0	-0.14	0.14
19619	ENSMUSG00000028708.16	Mknk1	chr4	+	115876580	115876624	115875380	115875545	115877949	115879250	19619	37,77,65,59	9,0,14,2	81,83,41,41	2,1,0,1	193	149	3.69871e-06	0.000278896	0.76,1.0,0.782,0.958	0.969,0.985,1.0,0.969	-0.106	0.106
19631	ENSMUSG00000022558.16	Mroh1	chr15	+	76432371	76432398	76432148	76432295	76433273	76433396	19631	41,32,13,33	0,0,11,0	26,32,30,15	0,0,0,1	176	149	0.015845	0.208795	1.0,1.0,0.5,1.0	1.0,1.0,1.0,0.927	-0.107	0.107
19645	ENSMUSG00000027281.16	Slx4ip	chr2	+	137004933	137005054	137000183	137000273	137043999	137044077	19645	1,0,0,1	5,3,1,2	2,1,1,6	0,1,9,1	270	149	0.000338323	0.010532	0.099,0.0,0.0,0.216	1.0,0.356,0.058,0.768	-0.467	0.467
19665	ENSMUSG00000021079.16	Timm9	chr12	-	71132000	71132086	71126332	71126397	71136554	71136627	19665	75,89,53,70	22,18,23,21	86,66,54,71	30,15,10,0	235	149	0.0494939	0.484383	0.684,0.758,0.594,0.679	0.645,0.736,0.774,1.0	-0.11	0.11
19666	ENSMUSG00000021079.16	Timm9	chr12	-	71132506	71132642	71132000	71132086	71136554	71136648	19666	15,9,22,45	30,45,29,28	33,47,38,45	30,21,22,20	285	149	0.000537229	0.015141	0.207,0.095,0.284,0.457	0.365,0.539,0.475,0.541	-0.219	0.219
19667	ENSMUSG00000021079.16	Timm9	chr12	-	71132506	71132758	71132000	71132086	71136554	71136597	19667	15,10,25,40	30,45,29,28	36,42,38,37	30,21,22,20	298	149	0.000485684	0.0139319	0.2,0.1,0.301,0.417	0.375,0.5,0.463,0.481	-0.2	0.2
19668	ENSMUSG00000021079.16	Timm9	chr12	-	71132506	71132798	71132000	71132086	71136554	71136612	19668	20,10,25,40	30,45,29,28	38,42,39,37	30,21,22,20	298	149	0.000670952	0.0179641	0.25,0.1,0.301,0.417	0.388,0.5,0.47,0.481	-0.193	0.193
19690	ENSMUSG00000040648.14	Ppip5k2	chr1	-	97716541	97716604	97713003	97713144	97719833	97719906	19690	25,26,18,41	10,30,10,33	54,31,71,41	13,9,16,22	212	149	0.00241814	0.0490243	0.637,0.379,0.559,0.466	0.745,0.708,0.757,0.567	-0.184	0.184
19691	ENSMUSG00000040648.14	Ppip5k2	chr1	-	97717441	97717561	97713003	97713144	97719833	97719906	19691	21,17,14,34	10,30,10,33	36,26,27,33	13,9,16,22	269	149	0.0309568	0.339997	0.538,0.239,0.437,0.363	0.605,0.615,0.483,0.454	-0.145	0.145
19738	ENSMUSG00000038685.18	Rtel1	chr2	+	181355923	181355959	181355764	181355812	181356157	181356258	19738	6,9,3,8	0,2,9,0	2,4,6,6	0,1,0,0	185	149	0.00221975	0.0457212	1.0,0.784,0.212,1.0	1.0,0.763,1.0,1.0	-0.192	0.192
19755	ENSMUSG00000028179.12	Cth	chr3	-	157913599	157913731	157908898	157908976	157920016	157920112	19755	15,8,32,18	2,4,2,0	22,21,50,14	0,0,0,0	281	149	0.000686515	0.0182326	0.799,0.515,0.895,1.0	1.0,1.0,1.0,1.0	-0.198	0.198
19807	ENSMUSG00000039852.17	Rere	chr4	+	150439342	150439468	150431522	150431593	150468694	150468800	19807	15,19,3,9	6,0,0,8	13,15,6,10	0,4,0,0	275	149	0.0106079	0.155784	0.575,1.0,1.0,0.379	1.0,0.67,1.0,1.0	-0.179	0.179
19814	ENSMUSG00000085396.7	Firre	chrX	-	50573014	50573141	50569276	50570291	50573223	50573351	19814	8,11,6,10	12,3,7,5	22,13,15,10	0,0,1,0	276	149	1.62115e-12	1.04515e-09	0.265,0.664,0.316,0.519	1.0,1.0,0.89,1.0	-0.531	0.531
19820	ENSMUSG00000085396.7	Firre	chrX	-	50603438	50603525	50600743	50600898	50608477	50608604	19820	7,10,2,10	0,4,3,1	6,6,16,10	1,1,0,0	236	149	0.000677969	0.0180988	1.0,0.612,0.296,0.863	0.791,0.791,1.0,1.0	-0.203	0.203
19825	ENSMUSG00000085396.7	Firre	chrX	-	50620674	50620804	50615510	50615515	50626436	50626509	19825	0,6,6,11	7,15,0,0	14,9,1,5	21,31,11,24	279	149	0.047098	0.4675	0.0,0.176,1.0,1.0	0.263,0.134,0.046,0.1	0.408	0.408
19832	ENSMUSG00000056211.13	R3hdm1	chr1	+	128184399	128184654	128181985	128182212	128186757	128186909	19832	28,28,31,77	11,0,1,4	33,18,50,40	0,0,0,0	298	149	2.83867e-06	0.000227341	0.56,1.0,0.939,0.906	1.0,1.0,1.0,1.0	-0.149	0.149
19856	ENSMUSG00000026005.15	Rpe	chr1	+	66701616	66701648	66700830	66701017	66706445	66706525	19856	2,10,5,4	2,5,6,2	6,1,0,2	0,0,1,0	181	149	2.29795e-05	0.00124234	0.452,0.622,0.407,0.622	1.0,1.0,0.0,1.0	-0.224	0.224
19877	ENSMUSG00000028906.17	Epb41	chr4	-	131962923	131962986	131957619	131957819	131964130	131964187	19877	29,37,34,23	0,4,8,4	12,20,21,26	0,0,0,0	212	149	4.63025e-07	5.60587e-05	1.0,0.867,0.749,0.802	1.0,1.0,1.0,1.0	-0.145	0.145
19924	ENSMUSG00000031626.18	Sorbs2	chr8	+	45645760	45645852	45627738	45628272	45658802	45658941	19924	40,43,41,43	72,57,33,36	78,66,45,45	17,18,11,16	241	149	7.27052e-12	3.90609e-09	0.256,0.318,0.434,0.425	0.739,0.694,0.717,0.635	-0.338	0.338
19931	ENSMUSG00000031626.18	Sorbs2	chr8	+	45770545	45770590	45769828	45769895	45772533	45772653	19931	101,195,60,137	0,25,14,20	114,95,61,84	0,0,0,0	194	149	7.79377e-14	6.69952e-11	1.0,0.857,0.767,0.84	1.0,1.0,1.0,1.0	-0.134	0.134
19936	ENSMUSG00000031626.18	Sorbs2	chr8	+	45783542	45783626	45775588	45775703	45785268	45785325	19936	5,13,9,24	10,24,3,1	30,6,35,18	3,2,13,0	233	149	0.0393709	0.409724	0.242,0.257,0.657,0.939	0.865,0.657,0.633,1.0	-0.265	0.265
19938	ENSMUSG00000031626.18	Sorbs2	chr8	+	45783542	45783626	45782801	45782960	45785268	45785325	19938	20,34,16,55	25,23,6,21	73,15,55,51	7,1,9,0	233	149	5.51385e-09	1.40783e-06	0.338,0.486,0.63,0.626	0.87,0.906,0.796,1.0	-0.373	0.373
19988	ENSMUSG00000026017.13	Carf	chr1	+	60108082	60108200	60105343	60105427	60109326	60109449	19988	2,8,3,1	2,0,2,1	3,2,6,1	0,0,0,1	267	149	0.014098	0.19175	0.358,1.0,0.456,0.358	1.0,1.0,1.0,0.358	-0.296	0.296
20031	ENSMUSG00000022601.11	Zbtb11	chr16	+	55990258	55991094	55982174	55982406	55991441	55991618	20031	29,24,16,26	4,2,5,0	49,37,27,34	0,0,0,0	298	149	1.98764e-06	0.000174939	0.784,0.857,0.615,1.0	1.0,1.0,1.0,1.0	-0.186	0.186
20075	ENSMUSG00000026395.16	Ptprc	chr1	-	138117753	138117894	138116953	138117025	138126302	138126326	20075	10,5,2,1	15,20,20,17	0,1,0,0	20,21,12,6	290	149	4.08383e-06	0.000301727	0.255,0.114,0.049,0.029	0.0,0.024,0.0,0.0	0.106	0.106
20080	ENSMUSG00000026395.16	Ptprc	chr1	-	138122455	138122584	138119472	138120166	138126302	138126326	20080	5,7,2,1	1,4,2,0	1,0,4,1	0,4,0,0	278	149	0.0409675	0.422588	0.728,0.484,0.349,1.0	1.0,0.0,1.0,1.0	-0.11	0.11
20092	ENSMUSG00000031922.12	Cep57	chr9	-	13812632	13812710	13810626	13810862	13813409	13813514	20092	12,58,20,28	16,14,6,1	30,25,34,39	3,0,2,1	227	149	4.84281e-05	0.0022957	0.33,0.731,0.686,0.948	0.868,1.0,0.918,0.962	-0.263	0.263
20103	ENSMUSG00000022791.19	Tnk2	chr16	+	32678668	32678713	32677893	32677985	32679458	32679635	20103	3,0,0,1	30,32,25,14	6,18,3,1	14,19,26,5	194	149	1.10838e-07	1.71155e-05	0.071,0.0,0.0,0.052	0.248,0.421,0.081,0.133	-0.19	0.19
20270	ENSMUSG00000003813.15	Rad23a	chr8	-	84838272	84838311	84838006	84838134	84838468	84838666	20270	22,40,25,40	3,0,10,0	32,42,44,41	0,0,0,0	188	149	2.98923e-05	0.00154173	0.853,1.0,0.665,1.0	1.0,1.0,1.0,1.0	-0.121	0.121
20275	ENSMUSG00000038174.14	Fam126b	chr1	-	58534484	58534652	58527020	58530259	58535389	58535549	20275	14,7,3,5	8,11,10,30	6,8,7,0	27,12,50,13	298	149	0.0395746	0.411512	0.467,0.241,0.13,0.077	0.1,0.25,0.065,0.0	0.125	0.125
20310	ENSMUSG00000026933.17	Camsap1	chr2	-	25952677	25952819	25945133	25945273	25956246	25956327	20310	19,10,10,15	10,0,7,0	5,15,14,1	1,0,3,0	291	149	0.0254221	0.294248	0.493,1.0,0.422,1.0	0.719,1.0,0.705,1.0	-0.127	0.127
20317	ENSMUSG00000037971.10	1110032A03Rik	chr9	-	50764695	50764926	50764223	50764290	50767857	50768452	20317	164203134190	3,19,23,5	254197262246	0,4,0,5	298	149	5.20466e-10	1.81375e-07	0.965,0.842,0.744,0.95	1.0,0.961,1.0,0.961	-0.105	0.105
20318	ENSMUSG00000037971.10	1110032A03Rik	chr9	-	50764764	50764926	50764223	50764290	50767857	50768160	20318	107,111,77,106	3,19,23,5	110125134134	0,4,0,5	298	149	1.86143e-07	2.62309e-05	0.947,0.745,0.626,0.914	1.0,0.94,1.0,0.931	-0.16	0.16
20322	ENSMUSG00000037818.16	Abhd18	chr3	+	40906166	40906218	40905871	40905956	40910502	40910603	20322	4,9,9,1	4,12,6,17	6,1,6,3	50,14,24,37	201	149	0.00122258	0.0286096	0.426,0.357,0.527,0.042	0.082,0.05,0.156,0.057	0.252	0.252
20483	ENSMUSG00000057738.14	Sptan1	chr2	+	30001099	30001159	29999913	30000062	30002230	30002429	20483	100,28,66,72	35,39,23,43	18,71,46,25	48,51,69,17	209	149	0.0216249	0.262307	0.671,0.339,0.672,0.544	0.211,0.498,0.322,0.512	0.171	0.171
20491	ENSMUSG00000041997.16	Tlk1	chr2	-	70770003	70770075	70757473	70757549	70825192	70825323	20491	9,17,28,8	5,3,0,0	22,24,25,19	0,5,0,0	221	149	0.0338516	0.363251	0.548,0.793,1.0,1.0	1.0,0.764,1.0,1.0	-0.106	0.106
20524	ENSMUSG00000028621.17	Cyb5rl	chr4	+	107077675	107077780	107073872	107073960	107080890	107081094	20524	10,5,23,20	0,0,0,0	27,11,7,8	0,5,3,0	254	149	0.000580258	0.0159958	1.0,1.0,1.0,1.0	1.0,0.563,0.578,1.0	0.215	0.215
20555	ENSMUSG00000026153.15	Fam135a	chr1	-	24030741	24030896	24028199	24030528	24032662	24032736	20555	20,41,22,30	9,3,3,6	25,10,27,35	3,1,2,0	298	149	0.00362563	0.067168	0.526,0.872,0.786,0.714	0.806,0.833,0.871,1.0	-0.153	0.153
20564	ENSMUSG00000026811.18	St6galnac6	chr2	+	32608041	32608096	32607025	32607111	32609225	32609316	20564	5,5,9,1	1,0,0,0	3,3,6,5	4,4,0,0	204	149	0.000597546	0.0163409	0.785,1.0,1.0,1.0	0.354,0.354,1.0,1.0	0.269	0.269
20566	ENSMUSG00000026811.18	St6galnac6	chr2	+	32608041	32608225	32607010	32607111	32609225	32609316	20566	6,2,4,1	1,0,0,0	2,4,4,2	4,4,0,0	298	149	0.000304454	0.00965714	0.75,1.0,1.0,1.0	0.2,0.333,1.0,1.0	0.304	0.304
20568	ENSMUSG00000026811.18	St6galnac6	chr2	+	32609225	32609316	32606960	32607111	32612223	32612327	20568	98,48,68,29	0,8,0,12	87,49,70,78	3,2,1,0	240	149	0.00167829	0.036523	1.0,0.788,1.0,0.6	0.947,0.938,0.978,1.0	-0.119	0.119
20579	ENSMUSG00000026082.11	Rev1	chr1	-	38128251	38128315	38108403	38108467	38129461	38129801	20579	5,0,1,6	3,3,10,11	0,0,1,1	4,8,6,8	213	149	0.000173612	0.00623095	0.538,0.0,0.065,0.276	0.0,0.0,0.104,0.08	0.174	0.174
20590	ENSMUSG00000028300.14	C9orf72	chr4	-	35221880	35222088	35218592	35218916	35225928	35226123	20590	8,12,1,4	2,1,0,5	0,4,0,3	1,4,1,0	298	149	0.0166458	0.217238	0.667,0.857,1.0,0.286	0.0,0.333,0.0,1.0	0.369	0.369
20621	ENSMUSG00000027893.14	Ahcyl1	chr3	-	107671147	107671244	107670203	107670320	107672041	107672136	20621	80,58,90,76	4,10,20,2	61,121,93,38	0,6,1,0	246	149	3.5607e-06	0.000273283	0.924,0.778,0.732,0.958	1.0,0.924,0.983,1.0	-0.129	0.129
20628	ENSMUSG00000068457.14	Uty	chrY	-	1137657	1137732	1136847	1136996	1137806	1137871	20628	9,24,24,33	2,3,0,3	22,23,46,22	0,0,0,0	224	149	0.00353284	0.0659473	0.75,0.842,1.0,0.88	1.0,1.0,1.0,1.0	-0.132	0.132
20629	ENSMUSG00000068457.14	Uty	chrY	-	1161174	1161230	1157906	1158634	1168089	1168185	20629	0,1,0,5	3,15,19,25	0,1,1,11	11,4,10,10	205	149	0.029676	0.329013	0.0,0.046,0.0,0.127	0.0,0.154,0.068,0.444	-0.123	0.123
20630	ENSMUSG00000068457.14	Uty	chrY	-	1161178	1161230	1157906	1158634	1168089	1168185	20630	0,1,0,0	3,15,19,25	0,7,0,4	11,4,10,10	201	149	0.000308092	0.00976054	0.0,0.047,0.0,0.0	0.0,0.565,0.0,0.229	-0.187	0.187
20631	ENSMUSG00000068457.14	Uty	chrY	-	1169122	1169257	1168089	1168185	1169964	1170184	20631	20,16,31,34	6,6,9,11	76,22,30,47	6,4,2,4	284	149	0.000111347	0.00442437	0.636,0.583,0.644,0.619	0.869,0.743,0.887,0.86	-0.219	0.219
20664	ENSMUSG00000034940.15	Synrg	chr11	+	83985248	83985551	83982195	83982307	83986813	83986851	20664	26,25,36,13	1,5,0,6	39,34,15,22	1,0,0,0	298	149	7.90122e-06	0.00051584	0.929,0.714,1.0,0.52	0.951,1.0,1.0,1.0	-0.197	0.197
20669	ENSMUSG00000034940.15	Synrg	chr11	+	84039655	84039691	84039210	84039321	84040796	84040928	20669	21,19,7,19	6,4,5,8	9,35,21,29	4,0,5,5	185	149	0.0439009	0.443794	0.738,0.793,0.53,0.657	0.644,1.0,0.772,0.824	-0.131	0.131
20672	ENSMUSG00000061755.10	Bod1l	chr5	-	41791796	41791937	41787537	41788949	41794226	41794380	20672	8,4,10,4	12,2,14,9	9,14,14,18	8,9,2,5	290	149	0.0068486	0.110313	0.255,0.507,0.268,0.186	0.366,0.444,0.782,0.649	-0.256	0.256
20682	ENSMUSG00000030987.5	Stim1	chr7	+	102428773	102428866	102427081	102427317	102430884	102430928	20682	28,22,25,15	19,23,26,27	11,9,6,7	27,25,26,25	242	149	4.00621e-05	0.00196038	0.476,0.371,0.372,0.255	0.201,0.181,0.124,0.147	0.205	0.205
20685	ENSMUSG00000038007.14	Acer2	chr4	+	86900481	86900619	86887023	86887165	86911615	86911753	20685	82,86,92,75	5,6,8,7	62,82,82,64	0,2,0,0	287	149	2.60035e-08	5.01222e-06	0.895,0.882,0.857,0.848	1.0,0.955,1.0,1.0	-0.118	0.118
20701	ENSMUSG00000065954.11	Tacc1	chr8	-	25181822	25182930	25177933	25177994	25200090	25200206	20701	18,34,25,32	0,0,12,0	11,28,16,7	6,6,10,3	298	149	0.000170525	0.00615036	1.0,1.0,0.51,1.0	0.478,0.7,0.444,0.538	0.337	0.337
20703	ENSMUSG00000065954.11	Tacc1	chr8	-	25200090	25200206	25177933	25177994	25240793	25240901	20703	1,1,8,0	11,6,7,13	6,5,9,3	1,2,4,4	265	149	7.42497e-05	0.00322349	0.049,0.086,0.391,0.0	0.771,0.584,0.559,0.297	-0.421	0.421
20704	ENSMUSG00000065954.11	Tacc1	chr8	-	25200090	25200206	25177933	25177994	25256361	25256569	20704	0,0,17,1	2,5,0,0	6,5,11,4	0,0,0,3	265	149	0.00251577	0.0506058	0.0,0.0,1.0,1.0	1.0,1.0,1.0,0.428	-0.357	0.357
20713	ENSMUSG00000086141.7	9030622O22Rik	chr2	-	147967241	147967271	147962633	147962707	147972674	147973014	20713	17,9,7,25	0,1,2,0	14,21,23,11	16,0,2,5	179	149	0.000133758	0.00510259	1.0,0.882,0.744,1.0	0.421,1.0,0.905,0.647	0.163	0.163
20933	ENSMUSG00000052688.12	Rab7b	chr1	+	131705595	131705721	131698415	131698631	131711619	131715439	20933	14,0,2,15	4,7,4,4	6,1,0,5	0,0,1,2	275	149	0.00291201	0.056847	0.655,0.0,0.213,0.67	1.0,1.0,0.0,0.575	-0.259	0.259
20935	ENSMUSG00000029004.15	Kmt2e	chr5	+	23446525	23446598	23434448	23434783	23450151	23450336	20935	23,16,31,13	16,52,28,18	18,15,1,1	20,29,44,17	222	149	0.00531613	0.0903707	0.491,0.171,0.426,0.326	0.377,0.258,0.015,0.038	0.182	0.182
20959	ENSMUSG00000014418.16	Hps5	chr7	-	46775153	46775284	46774813	46774937	46775764	46775951	20959	2,5,0,0	9,2,6,8	0,0,0,1	6,4,9,18	280	149	0.0315521	0.344087	0.106,0.571,0.0,0.0	0.0,0.0,0.0,0.029	0.162	0.162
20983	ENSMUSG00000046782.14	Ttc6	chr12	+	57704400	57704550	57702225	57702360	57705536	57705677	20983	1,0,2,4	0,1,1,3	0,2,2,1	3,0,0,0	298	149	0.0207588	0.254796	1.0,0.0,0.5,0.4	0.0,1.0,1.0,1.0	-0.275	0.275
20987	ENSMUSG00000013973.12	Dedd	chr1	+	171331252	171331285	171329568	171329692	171338251	171338339	20987	5,4,0,7	2,3,6,3	10,7,12,4	2,4,2,1	182	149	0.0269946	0.306803	0.672,0.522,0.0,0.656	0.804,0.589,0.831,0.766	-0.285	0.285
20994	ENSMUSG00000031392.18	Irak1	chrX	-	74017900	74018017	74017129	74017430	74018129	74018366	20994	2,3,11,16	0,0,0,6	14,6,8,6	13,4,11,6	266	149	8.24137e-05	0.00349553	1.0,1.0,1.0,0.599	0.376,0.457,0.289,0.359	0.53	0.53
21011	ENSMUSG00000019338.13	Zfp687	chr3	-	95013832	95013928	95011839	95012476	95015110	95015224	21011	8,6,12,9	0,4,0,4	9,18,9,14	0,3,0,1	245	149	0.00938203	0.140911	1.0,0.477,1.0,0.578	1.0,0.785,1.0,0.895	-0.156	0.156
21013	ENSMUSG00000019338.13	Zfp687	chr3	-	95013832	95013928	95011839	95012476	95015319	95015448	21013	8,6,21,7	1,1,0,0	6,13,10,9	8,1,0,0	245	149	0.0128567	0.178925	0.83,0.785,1.0,1.0	0.313,0.888,1.0,1.0	0.104	0.104
21025	ENSMUSG00000054387.13	Mdm4	chr1	-	133004653	133004692	133003790	133003890	133009136	133009192	21025	10,2,8,4	13,14,15,10	4,10,3,13	2,3,6,3	188	149	0.0019855	0.0417294	0.379,0.102,0.297,0.241	0.613,0.725,0.284,0.774	-0.344	0.344
21026	ENSMUSG00000054387.13	Mdm4	chr1	-	133004653	133004721	133003790	133003890	133009136	133009192	21026	28,32,13,54	13,14,15,10	52,24,21,28	2,3,6,3	217	149	0.00026424	0.0086916	0.597,0.611,0.373,0.788	0.947,0.846,0.706,0.865	-0.249	0.249
21048	ENSMUSG00000022092.11	Ppp3cc	chr14	-	70220016	70220046	70217864	70218277	70224309	70224407	21048	7,7,15,0	0,10,0,6	10,12,28,6	0,0,0,0	179	149	8.60021e-05	0.00360036	1.0,0.368,1.0,0.0	1.0,1.0,1.0,1.0	-0.408	0.408
21088	ENSMUSG00000030265.14	Kras	chr6	-	145225073	145225197	145220244	145220724	145232094	145232254	21088	48,65,46,41	67,69,33,28	73,39,57,46	22,32,17,30	273	149	0.00590191	0.098066	0.281,0.34,0.432,0.444	0.644,0.399,0.647,0.456	-0.162	0.162
21160	ENSMUSG00000009995.17	Taz	chrX	+	74288661	74288714	74288447	74288513	74289104	74289182	21160	50,75,23,42	36,20,13,20	56,55,69,49	22,16,5,20	202	149	0.041793	0.428754	0.506,0.734,0.566,0.608	0.652,0.717,0.911,0.644	-0.128	0.128
21161	ENSMUSG00000009995.17	Taz	chrX	+	74288661	74288714	74288447	74288513	74289298	74289348	21161	19,19,8,7	4,0,0,4	19,15,20,12	0,0,0,3	202	149	0.00359524	0.0667007	0.778,1.0,1.0,0.563	1.0,1.0,1.0,0.747	-0.101	0.101
21162	ENSMUSG00000009995.17	Taz	chrX	+	74288928	74289019	74288450	74288513	74289104	74289182	21162	0,4,0,0	36,20,13,20	6,1,6,0	22,16,5,20	240	149	0.00125663	0.0292736	0.0,0.11,0.0,0.0	0.145,0.037,0.427,0.0	-0.125	0.125
21246	ENSMUSG00000055541.17	Lair1	chr7	-	4028706	4029036	4010729	4010846	4055796	4055953	21246	25,30,9,32	5,2,3,0	5,12,6,6	0,0,2,0	298	149	0.000590618	0.0162344	0.714,0.882,0.6,1.0	1.0,1.0,0.6,1.0	-0.101	0.101
21248	ENSMUSG00000055541.17	Lair1	chr7	-	4055796	4055953	4028706	4029036	4063068	4063116	21248	7,10,6,11	4,2,1,6	2,3,1,6	0,6,0,0	298	149	0.030908	0.339606	0.467,0.714,0.75,0.478	1.0,0.2,1.0,1.0	-0.198	0.198
21262	ENSMUSG00000028896.13	Rcc1	chr4	-	132339202	132339241	132338050	132338238	132339924	132340006	21262	11,6,12,1	7,7,9,1	2,1,2,0	3,11,0,14	188	149	0.0111753	0.161722	0.555,0.405,0.514,0.442	0.346,0.067,1.0,0.0	0.126	0.126
21273	ENSMUSG00000064289.15	Tank	chr2	+	61593996	61594201	61593096	61593208	61613650	61613798	21273	14,15,17,9	3,10,15,18	5,8,2,0	7,23,18,8	298	149	0.000185272	0.00655389	0.7,0.429,0.362,0.2	0.263,0.148,0.053,0.0	0.307	0.307
21303	ENSMUSG00000026159.13	Agfg1	chr1	+	82886374	82886467	82886110	82886187	82893423	82893582	21303	41,92,54,97	26,23,19,6	113,53,122,71	2,4,15,9	242	149	0.000451892	0.0132575	0.493,0.711,0.636,0.909	0.972,0.891,0.834,0.829	-0.194	0.194
21316	ENSMUSG00000062270.14	Morf4l1	chr9	-	90103654	90103768	90102299	90102386	90107234	90107302	21316	42,73,53,38	197374182164	68,31,50,45	84,106,378,0	263	149	0.0178564	0.228074	0.108,0.1,0.142,0.116	0.314,0.142,0.07,1.0	-0.265	0.265
21317	ENSMUSG00000062270.14	Morf4l1	chr9	-	90103654	90103771	90102299	90102386	90107234	90107302	21317	68,117,103,69	197374182164	83,54,112,66	84,106,378,0	266	149	0.0170424	0.22096	0.162,0.149,0.241,0.191	0.356,0.222,0.142,1.0	-0.244	0.244
21351	ENSMUSG00000025968.16	Ndufs1	chr1	-	63175636	63175688	63172153	63172257	63176585	63176822	21351	5,0,0,0	14,18,29,33	9,0,2,8	8,21,14,23	201	149	0.000316129	0.00994187	0.209,0.0,0.0,0.0	0.455,0.0,0.096,0.205	-0.137	0.137
21473	ENSMUSG00000060798.7	Intu	chr3	+	40653705	40654253	40540766	40541009	40664259	40664345	21473	9,12,9,12	0,8,0,0	4,16,19,3	0,0,0,0	298	149	0.0137636	0.187698	1.0,0.429,1.0,1.0	1.0,1.0,1.0,1.0	-0.143	0.143
21510	ENSMUSG00000012296.16	Tjap1	chr17	-	46271799	46271929	46264882	46264978	46282345	46282439	21510	17,25,31,17	1,2,0,0	2,16,24,20	6,3,0,0	279	149	0.00818342	0.126976	0.901,0.87,1.0,1.0	0.151,0.74,1.0,1.0	0.22	0.22
21560	ENSMUSG00000040774.15	Cept1	chr3	-	106520008	106520093	106512802	106512887	106531136	106531278	21560	48,50,29,63	12,23,44,22	28,51,30,40	21,6,0,0	234	149	0.00115085	0.0273764	0.718,0.581,0.296,0.646	0.459,0.844,1.0,1.0	-0.265	0.265
21565	ENSMUSG00000031078.15	Cttn	chr7	-	144450977	144451088	144449559	144449615	144452026	144452137	21565	59,69,39,43	59,65,63,60	12,37,28,27	92,42,57,51	260	149	0.00267403	0.052963	0.364,0.378,0.262,0.291	0.07,0.335,0.22,0.233	0.109	0.109
21609	ENSMUSG00000020647.10	Ncoa1	chr12	-	4249835	4249890	4247361	4249750	4253656	4253746	21609	31,12,15,23	0,5,2,2	31,25,22,19	8,6,9,3	204	149	0.0207973	0.255129	1.0,0.637,0.846,0.894	0.739,0.753,0.641,0.822	0.106	0.106
21633	ENSMUSG00000026279.14	Thap4	chr1	-	93749937	93750985	93725156	93725316	93754456	93754864	21633	40,47,30,35	9,0,2,0	50,48,41,41	0,0,0,0	298	149	0.000103187	0.00414484	0.69,1.0,0.882,1.0	1.0,1.0,1.0,1.0	-0.107	0.107
21636	ENSMUSG00000030281.16	Il17rc	chr6	+	113474552	113474597	113474160	113474272	113476398	113476538	21636	65,69,38,72	0,6,13,0	65,60,80,55	0,0,0,0	194	149	2.50575e-06	0.00020801	1.0,0.898,0.692,1.0	1.0,1.0,1.0,1.0	-0.103	0.103
21663	ENSMUSG00000097080.8	1700086O06Rik	chr18	-	38239572	38239751	38239057	38239189	38240838	38240953	21663	22,34,34,29	0,1,3,12	13,17,16,7	0,0,0,0	298	149	2.71066e-06	0.000220513	1.0,0.944,0.85,0.547	1.0,1.0,1.0,1.0	-0.165	0.165
21736	ENSMUSG00000046080.17	Clec9a	chr6	+	129421043	129421162	129419481	129419633	129422225	129422358	21736	6,5,5,6	9,0,2,1	10,6,9,4	0,0,0,0	268	149	7.86232e-07	8.41301e-05	0.27,1.0,0.582,0.769	1.0,1.0,1.0,1.0	-0.345	0.345
21775	ENSMUSG00000037395.15	Rcor3	chr1	-	192101625	192101867	192100583	192101155	192108643	192108701	21775	3,0,4,1	3,2,7,0	8,5,1,5	0,0,2,5	298	149	0.0123186	0.173298	0.333,0.0,0.222,1.0	1.0,1.0,0.2,0.333	-0.245	0.245
21778	ENSMUSG00000037395.15	Rcor3	chr1	-	192108643	192108701	192098545	192101155	192116268	192116346	21778	10,5,10,3	5,9,6,3	4,3,7,8	0,3,2,1	207	149	0.0174217	0.224524	0.59,0.286,0.545,0.419	1.0,0.419,0.716,0.852	-0.287	0.287
21831	ENSMUSG00000062761.7	Zfp512	chr5	+	31453154	31453213	31452434	31452577	31465445	31465633	21831	9,12,5,1	3,0,2,0	1,3,11,3	0,2,6,2	208	149	0.0344717	0.368403	0.682,1.0,0.642,1.0	1.0,0.518,0.568,0.518	0.18	0.18
21890	ENSMUSG00000033021.16	Gmppa	chr1	+	75436145	75436312	75435942	75436011	75436777	75436838	21890	3,15,10,13	1,7,3,2	17,17,27,12	2,1,0,0	298	149	2.78908e-06	0.000224765	0.6,0.517,0.625,0.765	0.81,0.895,1.0,1.0	-0.299	0.299
21906	ENSMUSG00000015659.12	Serac1	chr17	-	6069298	6069388	6067528	6067660	6070752	6070889	21906	0,6,5,5	2,6,3,2	6,6,19,0	0,7,0,1	239	149	0.0182624	0.231312	0.0,0.384,0.51,0.609	1.0,0.348,1.0,0.0	-0.211	0.211
21962	ENSMUSG00000092203.7	1110038B12Rik	chr17	-	34951884	34951925	34950697	34950847	34952135	34952173	21962	472197224210	29,29,0,49	42,129,137,59	22,4,18,30	190	149	0.017073	0.221246	0.927,0.842,1.0,0.771	0.6,0.962,0.857,0.607	0.129	0.129
22032	ENSMUSG00000051977.16	Prdm9	chr17	-	15562813	15562937	15562414	15562522	15563220	15563301	22032	17,8,9,13	0,0,9,0	12,6,20,10	0,0,0,0	273	149	0.01807	0.229891	1.0,1.0,0.353,1.0	1.0,1.0,1.0,1.0	-0.162	0.162
22033	ENSMUSG00000079434.8	Neu2	chr1	+	87579433	87579535	87574026	87574126	87594877	87595089	22033	0,0,1,4	2,2,2,2	9,3,14,6	0,0,0,0	251	149	2.1381e-11	9.67322e-09	0.0,0.0,0.229,0.543	1.0,1.0,1.0,1.0	-0.807	0.807
22075	ENSMUSG00000094806.2	Cyp2d10	chr15	-	82405234	82405395	82403718	82403906	82405906	82405967	22075	11,12,22,2	0,0,1,0	23,1,0,7	0,4,1,0	298	149	0.0437453	0.442568	1.0,1.0,0.917,1.0	1.0,0.111,0.0,1.0	0.452	0.452
22117	ENSMUSG00000035642.16	Aamdc	chr7	-	97569686	97569774	97550547	97550741	97575587	97575691	22117	4,8,2,5	6,0,8,9	1,1,2,2	5,6,8,14	237	149	0.00531411	0.0903707	0.295,1.0,0.136,0.259	0.112,0.095,0.136,0.082	0.316	0.316
22119	ENSMUSG00000035642.16	Aamdc	chr7	-	97569686	97569774	97565150	97565300	97575587	97575691	22119	10,40,13,7	43,31,45,37	7,2,9,18	51,46,55,51	237	149	0.012558	0.175527	0.128,0.448,0.154,0.106	0.079,0.027,0.093,0.182	0.114	0.114
22123	ENSMUSG00000035642.16	Aamdc	chr7	-	97575587	97575691	97558130	97558226	97579365	97579398	22123	6,5,20,17	8,2,0,0	19,24,28,21	0,0,0,0	253	149	0.000466854	0.013573	0.306,0.596,1.0,1.0	1.0,1.0,1.0,1.0	-0.274	0.274
22168	ENSMUSG00000074406.5	Zfp628	chr7	+	4917409	4917516	4915216	4915405	4918775	4922002	22168	10,15,2,0	3,0,7,4	8,14,4,16	0,3,2,1	256	149	0.0165346	0.216005	0.66,1.0,0.143,0.0	1.0,0.731,0.538,0.903	-0.342	0.342
22220	ENSMUSG00000084983.7	Gm11789	chr11	-	120529011	120529159	120528263	120528636	120530340	120530475	22220	34,6,26,29	22,0,0,0	28,34,25,26	8,8,9,10	297	149	0.00517281	0.0886642	0.437,1.0,1.0,1.0	0.637,0.681,0.582,0.566	0.243	0.243
22242	ENSMUSG00000028420.13	Tmem38b	chr4	+	53827292	53827383	53826054	53826220	53848865	53849050	22242	0,4,8,0	18,8,18,9	4,3,3,2	6,8,1,1	240	149	0.0324704	0.351089	0.0,0.237,0.216,0.0	0.293,0.189,0.651,0.554	-0.308	0.308
22270	ENSMUSG00000039997.16	Ifi203	chr1	-	173923948	173924137	173920406	173922604	173926805	173927222	22270	48,98,18,39	0,0,0,0	28,35,36,34	8,1,0,0	298	149	0.00245044	0.0496012	1.0,1.0,1.0,1.0	0.636,0.946,1.0,1.0	0.105	0.105
22274	ENSMUSG00000039997.16	Ifi203	chr1	-	173933782	173933926	173928274	173929516	173935009	173935177	22274	6,14,1,11	8,0,1,0	7,10,8,3	0,0,1,0	293	149	0.0135869	0.186174	0.276,1.0,0.337,1.0	1.0,1.0,0.803,1.0	-0.297	0.297
22303	ENSMUSG00000026504.17	Sdccag8	chr1	+	176828869	176828983	176814659	176815055	176831056	176831182	22303	7,15,9,14	0,7,0,5	14,10,13,4	0,0,0,0	263	149	1.74582e-06	0.000157417	1.0,0.548,1.0,0.613	1.0,1.0,1.0,1.0	-0.21	0.21
22353	ENSMUSG00000024219.16	Anks1	chr17	+	27978426	27978489	27976560	27976717	27985065	27985362	22353	0,1,0,2	11,1,8,0	12,2,3,0	11,12,5,5	212	149	0.0301304	0.332621	0.0,0.413,0.0,1.0	0.434,0.105,0.297,0.0	0.144	0.144
22391	ENSMUSG00000008305.18	Tle1	chr4	-	72138961	72139063	72138491	72138685	72139688	72139833	22391	12,10,14,11	0,5,0,4	12,10,25,21	0,1,0,3	251	149	0.00628852	0.102964	1.0,0.543,1.0,0.62	1.0,0.856,1.0,0.806	-0.125	0.125
22392	ENSMUSG00000008305.18	Tle1	chr4	-	72138961	72139063	72138587	72138688	72139688	72139833	22392	30,23,25,42	29,28,47,12	35,45,57,37	20,13,7,19	251	149	0.00698623	0.112048	0.38,0.328,0.24,0.675	0.51,0.673,0.829,0.536	-0.231	0.231
22413	ENSMUSG00000030269.14	Mtmr14	chr6	+	113277789	113277945	113270521	113270701	113280602	113280919	22413	65,59,62,63	24,23,22,37	64,71,80,67	16,18,30,15	298	149	0.0342398	0.366076	0.575,0.562,0.585,0.46	0.667,0.664,0.571,0.691	-0.103	0.103
22414	ENSMUSG00000030269.14	Mtmr14	chr6	+	113277830	113277945	113270521	113270701	113280602	113281087	22414	26,26,23,32	24,23,22,37	36,36,62,47	16,18,30,15	264	149	6.1953e-05	0.0027745	0.379,0.39,0.371,0.328	0.559,0.53,0.538,0.639	-0.199	0.199
22443	ENSMUSG00000026788.13	Zbtb43	chr2	-	33464913	33464974	33450286	33455123	33468432	33468505	22443	17,24,14,19	9,4,5,1	13,18,27,6	0,2,0,0	210	149	1.168e-06	0.000116745	0.573,0.81,0.665,0.931	1.0,0.865,1.0,1.0	-0.222	0.222
22444	ENSMUSG00000026788.13	Zbtb43	chr2	-	33464913	33465037	33454887	33455123	33468432	33468559	22444	22,20,17,35	9,4,5,1	20,35,47,23	0,2,0,0	273	149	7.37701e-08	1.21948e-05	0.572,0.732,0.65,0.95	1.0,0.905,1.0,1.0	-0.25	0.25
22458	ENSMUSG00000040522.5	Tlr8	chrX	-	167263748	167263890	167242695	167245849	167264151	167264284	22458	15,0,0,10	1,8,6,4	5,5,7,2	1,0,0,0	291	149	1.41085e-08	3.16375e-06	0.885,0.0,0.0,0.561	0.719,1.0,1.0,1.0	-0.568	0.568
22563	ENSMUSG00000036249.16	Rbm43	chr2	-	51932399	51932519	51929659	51929849	51934831	51935007	22563	7,18,12,14	2,0,0,6	11,13,15,11	0,2,0,0	269	149	0.00302441	0.0585537	0.66,1.0,1.0,0.564	1.0,0.783,1.0,1.0	-0.14	0.14
22583	ENSMUSG00000030562.17	Nox4	chr7	+	87323932	87323995	87323632	87323797	87338956	87339017	22583	2,2,1,5	0,0,0,0	12,0,17,3	0,2,0,4	212	149	0.00905569	0.137352	1.0,1.0,1.0,1.0	1.0,0.0,1.0,0.345	0.414	0.414
22724	ENSMUSG00000026131.20	Dst	chr1	+	34173001	34173085	34172182	34172345	34174114	34174222	22724	1,33,14,27	3,0,7,0	21,13,10,19	0,0,0,0	233	149	0.00128862	0.0299108	0.176,1.0,0.561,1.0	1.0,1.0,1.0,1.0	-0.316	0.316
22754	ENSMUSG00000028797.20	Tmem234	chr4	+	129601406	129601533	129600982	129601243	129601869	129601961	22754	57,33,43,26	39,18,25,22	21,19,38,12	24,36,22,26	276	149	0.0133476	0.183872	0.441,0.497,0.481,0.39	0.321,0.222,0.483,0.199	0.146	0.146
22759	ENSMUSG00000028797.20	Tmem234	chr4	+	129601406	129601625	129600982	129601243	129601869	129601930	22759	42,31,24,20	39,18,25,22	12,15,35,8	24,36,22,26	298	149	0.0277279	0.312794	0.35,0.463,0.324,0.312	0.2,0.172,0.443,0.133	0.125	0.125
22765	ENSMUSG00000028797.20	Tmem234	chr4	+	129601869	129601961	129601406	129601533	129602194	129602261	22765	56,17,44,49	15,29,21,14	49,39,32,50	4,20,13,1	241	149	0.0246466	0.288379	0.698,0.266,0.564,0.684	0.883,0.547,0.603,0.969	-0.198	0.198
22817	ENSMUSG00000024109.18	Nrxn1	chr17	-	90163791	90163881	90162113	90162433	90208322	90208494	22817	6,5,14,49	0,3,0,0	0,1,1,6	3,0,2,0	239	149	0.0222515	0.26764	1.0,0.51,1.0,1.0	0.0,1.0,0.238,1.0	0.318	0.318
22976	ENSMUSG00000010064.15	Slc38a3	chr9	-	107665169	107665477	107659367	107659464	107667135	107667374	22976	32,28,18,16	7,15,2,1	5,7,27,12	0,3,0,2	298	149	0.0285803	0.319752	0.696,0.483,0.818,0.889	1.0,0.538,1.0,0.75	-0.101	0.101
22978	ENSMUSG00000010064.15	Slc38a3	chr9	-	107665169	107665477	107659367	107659464	107668852	107669013	22978	2,12,5,4	2,4,1,0	1,4,8,3	10,4,2,6	298	149	0.0124864	0.174999	0.333,0.6,0.714,1.0	0.048,0.333,0.667,0.2	0.35	0.35
23152	ENSMUSG00000032253.13	Phip	chr9	-	82915961	82916024	82915295	82915424	82926396	82926531	23152	4,2,4,16	11,14,10,13	2,1,2,3	15,8,6,15	212	149	0.0124782	0.174979	0.204,0.091,0.219,0.464	0.086,0.081,0.19,0.123	0.124	0.124
23194	ENSMUSG00000036040.14	Adamtsl2	chr2	+	27093532	27093890	27089583	27089759	27095402	27095772	23194	41,116,36,84	5,2,7,1	27,33,20,12	0,0,0,0	298	149	1.67139e-05	0.000957818	0.804,0.967,0.72,0.977	1.0,1.0,1.0,1.0	-0.133	0.133
23240	ENSMUSG00000052446.17	Zfp961	chr8	+	71966099	71966160	71965793	71965916	71967898	71968053	23240	3,9,2,4	2,0,0,2	6,4,1,1	4,1,2,0	210	149	0.0319989	0.347594	0.516,1.0,1.0,0.587	0.516,0.739,0.262,1.0	0.146	0.146
23245	ENSMUSG00000027104.18	Atf2	chr2	-	73846196	73846375	73842359	73842446	73850588	73850717	23245	22,57,43,67	8,12,4,13	65,24,54,36	4,5,1,1	298	149	0.0011267	0.0269032	0.579,0.704,0.843,0.72	0.89,0.706,0.964,0.947	-0.165	0.165
23394	ENSMUSG00000032599.12	Ip6k2	chr9	+	108796540	108796572	108796063	108796396	108796654	108796783	23394	6,8,12,1	3,6,0,1	0,0,1,0	8,6,8,3	181	149	2.55451e-12	1.49718e-09	0.622,0.523,1.0,0.452	0.0,0.0,0.093,0.0	0.626	0.626
23397	ENSMUSG00000032599.12	Ip6k2	chr9	+	108796654	108796783	108796063	108796396	108797206	108797345	23397	3,6,3,10	15,15,13,8	12,6,12,14	8,8,16,0	278	149	0.0112077	0.162006	0.097,0.177,0.11,0.401	0.446,0.287,0.287,1.0	-0.309	0.309
23399	ENSMUSG00000032599.12	Ip6k2	chr9	+	108796670	108796783	108796540	108796572	108797206	108797994	23399	1,0,3,8	2,1,12,0	3,0,3,11	0,2,0,0	262	149	0.000210397	0.00722466	0.221,0.0,0.124,1.0	1.0,0.0,1.0,1.0	-0.414	0.414
23450	ENSMUSG00000039205.16	Ciz1	chr2	+	32365802	32365874	32364218	32364334	32367302	32367528	23450	16,28,35,37	3,5,3,8	31,29,48,47	4,1,0,6	221	149	0.0257163	0.296191	0.782,0.791,0.887,0.757	0.839,0.951,1.0,0.841	-0.104	0.104
23529	ENSMUSG00000038718.15	Pbx3	chr2	-	34176748	34176861	34175864	34175954	34178176	34178342	23529	2,4,4,19	2,6,0,0	2,4,0,0	4,0,4,1	262	149	0.0029652	0.0577106	0.363,0.275,1.0,1.0	0.221,1.0,0.0,0.0	0.354	0.354
23555	ENSMUSG00000071650.6	Ganab	chr19	+	8899195	8899394	8898070	8898159	8902263	8902368	23555	9,3,0,5	0,20,43,30	0,1,0,0	41,53,59,56	298	149	0.00152119	0.0339641	1.0,0.07,0.0,0.077	0.0,0.009,0.0,0.0	0.285	0.285
23589	ENSMUSG00000026890.19	Lhx6	chr2	-	36087367	36087471	36081952	36084075	36090961	36091136	23589	4,7,6,9	5,6,5,0	1,3,8,1	2,6,6,6	253	149	0.0477571	0.472586	0.32,0.407,0.414,1.0	0.227,0.227,0.44,0.089	0.289	0.289
23670	ENSMUSG00000033335.17	Dnm2	chr9	+	21490657	21490669	21489742	21489794	21494503	21494617	23670	1,8,2,10	42,29,23,35	0,0,0,0	37,37,32,28	161	149	2.24934e-08	4.42795e-06	0.022,0.203,0.074,0.209	0.0,0.0,0.0,0.0	0.127	0.127
23675	ENSMUSG00000035392.17	Dennd1a	chr2	-	37805071	37805200	37802014	37802273	37816915	37817004	23675	6,12,4,8	27,29,7,25	0,5,4,2	18,23,25,19	278	149	0.00273602	0.0539836	0.106,0.182,0.234,0.146	0.0,0.104,0.079,0.053	0.108	0.108
23757	ENSMUSG00000022770.17	Dlg1	chr16	+	31846836	31846933	31842769	31842839	31847635	31847669	23757	8,6,2,5	16,27,23,26	7,6,13,5	13,20,16,7	246	149	0.0111032	0.16104	0.232,0.119,0.05,0.104	0.246,0.154,0.33,0.302	-0.132	0.132
23896	ENSMUSG00000011831.16	Evi5	chr5	-	107810289	107810322	107799125	107799260	107812357	107812411	23896	17,34,15,47	59,45,37,44	26,22,60,43	34,8,34,19	182	149	0.000661971	0.0177637	0.191,0.382,0.249,0.467	0.385,0.692,0.591,0.649	-0.257	0.257
23912	ENSMUSG00000026946.9	Nmi	chr2	-	51972587	51972627	51960570	51960660	51972908	51973004	23912	33,29,40,27	4,2,4,8	51,15,65,40	7,8,12,15	189	149	0.0499322	0.487547	0.867,0.92,0.887,0.727	0.852,0.596,0.81,0.678	0.116	0.116
24001	ENSMUSG00000112433.1	Gm30122	chr10	-	78259803	78259916	78248879	78249253	78263070	78264139	24001	8,11,7,15	10,2,4,6	24,31,29,23	2,1,3,0	262	149	1.2013e-06	0.000117676	0.313,0.758,0.499,0.587	0.872,0.946,0.846,1.0	-0.377	0.377
24003	ENSMUSG00000041945.12	Mfsd9	chr1	-	40790270	40790400	40787529	40787617	40790484	40790687	24003	0,0,9,1	2,6,7,4	0,0,0,0	20,1,5,4	279	149	0.000690103	0.0182714	0.0,0.0,0.407,0.118	0.0,0.0,0.0,0.0	0.131	0.131
24009	ENSMUSG00000022094.15	Slc39a14	chr14	-	70331268	70331366	70318661	70318940	70351279	70351394	24009	84,98,146,150	21,7,29,6	202214216170	1,25,4,10	247	149	0.000435603	0.0129267	0.707,0.894,0.752,0.938	0.992,0.838,0.97,0.911	-0.105	0.105
24085	ENSMUSG00000060227.15	Casc4	chr2	+	121925560	121925728	121911870	121912041	121933477	121933697	24085	13,27,26,18	17,8,8,15	20,21,17,18	5,1,1,6	298	149	0.0029038	0.0568158	0.277,0.628,0.619,0.375	0.667,0.913,0.895,0.6	-0.294	0.294
24095	ENSMUSG00000060373.15	Hnrnpc	chr14	-	52098014	52098040	52083868	52084391	52103888	52103999	24095	98,44,76,86	72,41,102,44	21,76,0,30	34,39,43,31	175	149	0.0470547	0.467249	0.537,0.477,0.388,0.625	0.345,0.624,0.0,0.452	0.152	0.152
24167	ENSMUSG00000034903.18	Cobll1	chr2	-	65132495	65132534	65126207	65126305	65133578	65133807	24167	42,38,65,71	26,46,22,14	45,50,108,75	0,11,12,7	188	149	5.07399e-06	0.000355078	0.561,0.396,0.701,0.801	1.0,0.783,0.877,0.895	-0.274	0.274
24190	ENSMUSG00000039108.14	Lsm14b	chr2	+	180031793	180031871	180031360	180031528	180032060	180032222	24190	56,72,94,82	0,4,8,18	37,47,87,59	7,6,15,19	227	149	0.00619339	0.101859	1.0,0.922,0.885,0.749	0.776,0.837,0.792,0.671	0.12	0.12
24215	ENSMUSG00000015937.15	Macroh2a1	chr13	-	56088251	56088342	56084195	56084285	56089757	56090058	24215	35,38,63,28	114115107111	65,47,43,60	77,90,105,69	240	149	0.00173896	0.0374326	0.16,0.17,0.268,0.135	0.344,0.245,0.203,0.351	-0.102	0.102
24262	ENSMUSG00000027130.15	Slc12a6	chr2	+	112316240	112316285	112265824	112267092	112333382	112333477	24262	11,19,9,3	2,0,8,3	17,7,10,7	0,0,1,2	194	149	0.000373971	0.0113995	0.809,1.0,0.464,0.434	1.0,1.0,0.885,0.729	-0.227	0.227
24276	ENSMUSG00000053453.9	Thoc7	chr14	-	13957061	13957180	13954538	13954656	13957459	13957631	24276	27,31,36,36	0,8,4,4	32,12,21,10	7,13,7,4	268	149	0.00170939	0.0369814	1.0,0.683,0.833,0.833	0.718,0.339,0.625,0.582	0.271	0.271
24335	ENSMUSG00000056763.16	Cspp1	chr1	+	10116017	10116084	10113602	10113707	10116613	10116731	24335	11,19,7,9	5,5,0,2	17,17,35,17	0,0,0,0	216	149	8.29953e-08	1.33768e-05	0.603,0.724,1.0,0.756	1.0,1.0,1.0,1.0	-0.229	0.229
24359	ENSMUSG00000032175.11	Tyk2	chr9	-	21123976	21124209	21121391	21121758	21124410	21124558	24359	33,27,9,21	4,4,0,0	35,21,39,25	0,0,0,0	298	149	0.00172665	0.0372298	0.805,0.771,1.0,1.0	1.0,1.0,1.0,1.0	-0.106	0.106
24366	ENSMUSG00000034601.17	2700049A03Rik	chr12	+	71219190	71219299	71194291	71194466	71242943	71243303	24366	0,0,0,1	6,4,2,1	0,0,5,2	2,1,0,5	258	149	0.0302086	0.333199	0.0,0.0,0.0,0.366	0.0,0.0,1.0,0.188	-0.205	0.205
24395	ENSMUSG00000009207.15	Lnpk	chr2	-	74528091	74528174	74520290	74522297	74529630	74529801	24395	0,9,2,9	23,29,14,21	10,8,9,10	16,3,12,11	232	149	0.000270798	0.00882849	0.0,0.166,0.084,0.216	0.286,0.631,0.325,0.369	-0.286	0.286
24419	ENSMUSG00000060538.14	Tmem219	chr7	-	126896748	126896938	126890980	126891832	126922809	126922917	24419	73,65,85,59	19,1,26,0	116,116,114,68	5,17,0,0	298	149	0.0449087	0.450976	0.658,0.97,0.62,1.0	0.921,0.773,1.0,1.0	-0.111	0.111
24420	ENSMUSG00000060538.14	Tmem219	chr7	-	126897025	126897224	126891602	126891832	126898796	126898923	24420	19,6,25,13	0,0,32,10	9,0,22,0	10,28,31,7	298	149	0.000112237	0.00443921	1.0,1.0,0.281,0.394	0.31,0.0,0.262,0.0	0.526	0.526
24423	ENSMUSG00000060538.14	Tmem219	chr7	-	126897025	126897227	126891602	126891832	126898796	126898923	24423	76,51,112,41	0,0,32,10	75,94,63,68	10,28,31,7	298	149	0.0235988	0.279049	1.0,1.0,0.636,0.672	0.789,0.627,0.504,0.829	0.14	0.14
24496	ENSMUSG00000025162.18	Csnk1d	chr11	-	120964947	120965010	120961748	120963906	120967994	120968134	24496	111155147215	96,101,77,77	163127226182	53,36,64,54	212	149	9.9107e-05	0.00403118	0.448,0.519,0.573,0.662	0.684,0.713,0.713,0.703	-0.153	0.153
24506	ENSMUSG00000040506.16	Ambra1	chr2	+	91805023	91805110	91772290	91773747	91810029	91810209	24506	38,22,42,25	0,15,6,0	35,16,46,17	7,9,10,8	236	149	0.0263507	0.301611	1.0,0.481,0.815,1.0	0.759,0.529,0.744,0.573	0.173	0.173
24577	ENSMUSG00000054648.8	Zfp869	chr8	-	69714301	69714409	69710685	69710984	69716283	69716463	24577	16,17,7,13	2,1,2,1	13,16,12,17	0,0,0,0	257	149	0.0315722	0.344118	0.823,0.908,0.67,0.883	1.0,1.0,1.0,1.0	-0.179	0.179
24593	ENSMUSG00000036402.13	Gng12	chr6	+	66943824	66943877	66914452	66914510	67015724	67015843	24593	4,73,49,24	125,88,68,72	32,50,39,15	7,76,29,31	202	149	0.00475977	0.0831605	0.023,0.38,0.347,0.197	0.771,0.327,0.498,0.263	-0.228	0.228
24594	ENSMUSG00000036402.13	Gng12	chr6	+	66943824	66943882	66914452	66914510	67015724	67015843	24594	6,8,14,1	125,88,68,72	10,15,19,0	7,76,29,31	207	149	0.0014693	0.0330056	0.033,0.061,0.129,0.01	0.507,0.124,0.32,0.0	-0.18	0.18
24603	ENSMUSG00000027900.15	Dram2	chr3	+	106550498	106550675	106548905	106548985	106552155	106552280	24603	39,26,22,9	5,0,9,2	10,7,1,15	0,0,0,0	298	149	1.50325e-07	2.18829e-05	0.796,1.0,0.55,0.692	1.0,1.0,1.0,1.0	-0.24	0.24
24633	ENSMUSG00000066595.9	Flvcr1	chr1	-	191011535	191011646	191011187	191011293	191012138	191012242	24633	14,35,18,37	4,1,2,0	21,30,25,21	0,0,0,0	260	149	0.0197783	0.245685	0.667,0.953,0.838,1.0	1.0,1.0,1.0,1.0	-0.135	0.135
24687	ENSMUSG00000038095.15	Sbno1	chr5	-	124413184	124413289	124410069	124410379	124414398	124414527	24687	3,6,10,13	9,15,7,0	1,17,10,6	0,0,0,8	254	149	0.0040284	0.0727482	0.164,0.19,0.456,1.0	1.0,1.0,1.0,0.306	-0.374	0.374
24711	ENSMUSG00000036892.12	Prodh2	chr7	+	30494294	30494350	30493931	30494128	30506220	30506301	24711	3,3,0,1	6,0,4,15	0,2,5,1	4,0,2,0	205	149	0.0492512	0.482557	0.267,1.0,0.0,0.046	0.0,1.0,0.645,1.0	-0.333	0.333
24732	ENSMUSG00000026566.15	Mpzl1	chr1	-	165601749	165601855	165592239	165593677	165604609	165604742	24732	81,63,39,28	17,32,22,22	36,36,47,43	13,6,7,4	255	149	0.00247858	0.0499685	0.736,0.535,0.509,0.426	0.618,0.778,0.797,0.863	-0.213	0.213
24734	ENSMUSG00000026566.15	Mpzl1	chr1	-	165601749	165601864	165593653	165593677	165604609	165604742	24734	34,40,20,11	17,32,22,22	16,19,21,20	13,6,7,4	264	149	0.011832	0.168233	0.53,0.414,0.339,0.22	0.41,0.641,0.629,0.738	-0.229	0.229
24740	ENSMUSG00000028133.17	Rwdd3	chr3	-	121158767	121159255	121156400	121156516	121171111	121171182	24740	22,24,14,26	2,5,2,0	11,9,19,11	1,0,0,0	298	149	0.000256939	0.00848394	0.846,0.706,0.778,1.0	0.846,1.0,1.0,1.0	-0.129	0.129
24747	ENSMUSG00000028133.17	Rwdd3	chr3	-	121171111	121171182	121158767	121159255	121171591	121171694	24747	0,4,2,4	15,9,2,0	2,0,0,0	2,8,14,3	220	149	0.00129406	0.0299819	0.0,0.231,0.404,1.0	0.404,0.0,0.0,0.0	0.308	0.308
24760	ENSMUSG00000023452.19	Pisd	chr5	-	32745468	32745682	32742209	32742475	32746182	32746312	24760	1,0,1,2	12,25,3,17	2,5,2,0	5,0,13,6	298	149	0.0169019	0.219343	0.04,0.0,0.143,0.056	0.167,1.0,0.071,0.0	-0.25	0.25
24849	ENSMUSG00000037999.13	Arap2	chr5	-	62641327	62641396	62638961	62639036	62642794	62642942	24849	33,17,13,6	0,7,0,7	13,13,5,11	4,4,11,4	218	149	0.0483998	0.477248	1.0,0.624,1.0,0.369	0.69,0.69,0.237,0.653	0.181	0.181
24909	ENSMUSG00000026723.10	Trdmt1	chr2	-	13524950	13524997	13523425	13523497	13525617	13525694	24909	0,0,0,0	3,10,7,11	0,2,17,2	13,3,13,5	196	149	1.24346e-07	1.84986e-05	0.0,0.0,0.0,0.0	0.0,0.336,0.499,0.233	-0.267	0.267
25032	ENSMUSG00000022948.16	Setd4	chr16	-	93590255	93590286	93589910	93590085	93590873	93591089	25032	4,3,1,1	13,29,13,2	4,3,8,3	0,12,3,4	180	149	0.000970333	0.0239225	0.203,0.079,0.06,0.293	1.0,0.171,0.688,0.383	-0.402	0.402
25040	ENSMUSG00000040272.14	Accs	chr2	-	93838010	93838152	93836187	93836330	93838239	93838285	25040	41,22,33,22	0,12,0,0	34,12,12,19	0,0,0,0	291	149	0.00370985	0.0684332	1.0,0.484,1.0,1.0	1.0,1.0,1.0,1.0	-0.129	0.129
25180	ENSMUSG00000055013.16	Agap1	chr1	+	89766305	89766464	89743727	89743896	89789162	89789324	25180	19,36,17,21	1,3,9,2	5,16,17,20	0,4,0,1	298	149	0.0436152	0.441945	0.905,0.857,0.486,0.84	1.0,0.667,1.0,0.909	-0.122	0.122
25202	ENSMUSG00000055312.2	Them7	chr2	+	105284600	105284685	105224319	105224380	105297725	105297968	25202	42,37,28,39	0,0,0,0	41,30,72,45	7,5,1,5	234	149	1.658e-07	2.37827e-05	1.0,1.0,1.0,1.0	0.789,0.793,0.979,0.851	0.147	0.147
25218	ENSMUSG00000025157.8	Zdhhc16	chr19	+	41939856	41939904	41939599	41939733	41940649	41940713	25218	1,25,2,25	29,10,9,0	6,20,29,24	2,9,0,3	197	149	0.0119496	0.169038	0.025,0.654,0.144,1.0	0.694,0.627,1.0,0.858	-0.339	0.339
25223	ENSMUSG00000027166.14	Dnajc24	chr2	-	105970447	105970516	105966708	105967094	105980981	105981120	25223	42,34,37,20	0,0,0,0	25,40,13,13	0,0,2,5	218	149	0.0202403	0.249859	1.0,1.0,1.0,1.0	1.0,1.0,0.816,0.64	0.136	0.136
25257	ENSMUSG00000040302.17	Rbm48	chr5	-	3595254	3595445	3591482	3591815	3595965	3596082	25257	32,29,45,16	1,0,0,0	15,26,33,23	10,1,0,0	298	149	0.00249048	0.0501362	0.941,1.0,1.0,1.0	0.429,0.929,1.0,1.0	0.146	0.146
25285	ENSMUSG00000050565.16	Tor1aip2	chr1	+	156041074	156041134	156035725	156035920	156059410	156059587	25285	15,6,20,15	8,8,4,4	19,9,29,14	0,0,21,0	209	149	0.0105693	0.155305	0.572,0.348,0.781,0.728	1.0,1.0,0.496,1.0	-0.267	0.267
25288	ENSMUSG00000050565.16	Tor1aip2	chr1	+	156041074	156041134	156040916	156041002	156051293	156051623	25288	65,47,77,99	122,92,88,62	89,69,75,79	75,86,49,42	209	149	0.045045	0.45164	0.275,0.267,0.384,0.532	0.458,0.364,0.522,0.573	-0.115	0.115
25289	ENSMUSG00000050565.16	Tor1aip2	chr1	+	156041074	156041134	156040916	156041002	156059410	156059587	25289	8,2,7,2	21,6,17,8	8,5,34,10	23,9,12,11	209	149	0.0226478	0.270745	0.214,0.192,0.227,0.151	0.199,0.284,0.669,0.393	-0.19	0.19
25315	ENSMUSG00000035401.9	Emsy	chr7	-	98621390	98621540	98619298	98619469	98626465	98626720	25315	17,29,15,29	1,1,1,2	48,17,21,25	0,0,0,0	298	149	0.0377029	0.395237	0.895,0.935,0.882,0.879	1.0,1.0,1.0,1.0	-0.102	0.102
25371	ENSMUSG00000026348.7	Acmsd	chr1	+	127758003	127758099	127753787	127753881	127759658	127759831	25371	18,66,67,76	13,33,27,16	36,20,72,84	0,6,6,13	245	149	0.000133117	0.00508568	0.457,0.549,0.601,0.743	1.0,0.67,0.879,0.797	-0.249	0.249
25375	ENSMUSG00000027628.10	Aar2	chr2	+	156549851	156549990	156547607	156547883	156550648	156550684	25375	3,6,2,0	31,29,40,18	3,5,7,3	25,35,10,0	288	149	0.028602	0.319856	0.048,0.097,0.025,0.0	0.058,0.069,0.266,1.0	-0.306	0.306
25394	ENSMUSG00000031813.8	Mvb12a	chr8	+	71543956	71544123	71543132	71543231	71545223	71545350	25394	11,15,7,6	1,0,10,4	18,5,13,24	0,0,4,0	298	149	0.00232874	0.0475108	0.846,1.0,0.259,0.429	1.0,1.0,0.619,1.0	-0.271	0.271
25448	ENSMUSG00000023460.13	Rab12	chr17	-	66504988	66505178	66500348	66500448	66506032	66506093	25448	17,37,17,4	45,53,41,53	9,2,1,3	38,48,28,46	298	149	1.48502e-06	0.000140277	0.159,0.259,0.172,0.036	0.106,0.02,0.018,0.032	0.113	0.113
25512	ENSMUSG00000037266.18	Rsrp1	chr4	+	134925776	134925821	134925292	134925432	134926734	134926818	25512	20,39,28,17	180,141,72,200	3,3,1,1	150,91,298,105	194	149	0	0	0.079,0.175,0.23,0.061	0.015,0.025,0.003,0.007	0.124	0.124
25571	ENSMUSG00000025950.16	Idh1	chr1	-	65181627	65181698	65175230	65175368	65186304	65186479	25571	0,3,0,2	24,12,9,3	6,4,2,4	11,2,8,5	220	149	0.000268683	0.00879288	0.0,0.145,0.0,0.311	0.27,0.575,0.145,0.351	-0.221	0.221
25609	ENSMUSG00000027288.16	Zfp106	chr2	-	120539294	120539492	120531594	120532222	120545842	120545901	25609	49,80,58,36	44,20,39,41	58,69,45,68	21,35,7,15	298	149	0.0155679	0.206196	0.358,0.667,0.426,0.305	0.58,0.496,0.763,0.694	-0.194	0.194
25613	ENSMUSG00000027288.16	Zfp106	chr2	-	120545842	120545901	120539294	120539492	120555230	120555315	25613	21,36,26,17	5,12,0,0	25,20,22,31	0,0,0,0	208	149	6.51886e-07	7.34097e-05	0.751,0.682,1.0,1.0	1.0,1.0,1.0,1.0	-0.142	0.142
25638	ENSMUSG00000033526.16	Ppip5k1	chr2	-	121340750	121340933	121337821	121337963	121341615	121341737	25638	13,8,7,2	0,0,12,0	6,8,21,6	0,0,0,0	298	149	0.0181829	0.230418	1.0,1.0,0.226,1.0	1.0,1.0,1.0,1.0	-0.194	0.194
25663	ENSMUSG00000027201.16	Myef2	chr2	-	125097562	125097634	125095911	125096120	125097976	125098075	25663	20,31,3,11	9,12,15,10	0,11,0,0	9,9,3,1	221	149	0.00550866	0.0926841	0.6,0.635,0.119,0.426	0.0,0.452,0.0,0.0	0.332	0.332
25697	ENSMUSG00000023330.12	Dtwd1	chr2	+	126158409	126158553	126154540	126154860	126159769	126160028	25697	58,33,43,42	2,10,9,18	30,36,60,44	4,1,2,2	293	149	0.000265159	0.00870269	0.936,0.627,0.708,0.543	0.792,0.948,0.938,0.918	-0.196	0.196
25790	ENSMUSG00000025779.10	Ly96	chr1	+	16700848	16700923	16691683	16691773	16706172	16706225	25790	4,11,8,24	7,0,0,0	17,11,15,13	0,0,0,0	224	149	0.0439873	0.444078	0.275,1.0,1.0,1.0	1.0,1.0,1.0,1.0	-0.181	0.181
25832	ENSMUSG00000027300.10	Ubox5	chr2	-	130614888	130616742	130604484	130604626	130629915	130630027	25832	2,2,2,1	7,10,5,6	2,7,0,3	1,1,2,3	298	149	0.0269638	0.306589	0.125,0.091,0.167,0.077	0.5,0.778,0.0,0.333	-0.288	0.288
25897	ENSMUSG00000027341.10	Tmem230	chr2	-	132244018	132244141	132239491	132240626	132245955	132246074	25897	86,96,99,137	9,7,20,27	97107137119	5,3,6,11	272	149	8.00902e-05	0.00342515	0.84,0.883,0.731,0.735	0.914,0.951,0.926,0.856	-0.115	0.115
25991	ENSMUSG00000028522.16	Mier1	chr4	+	103127272	103127297	103119285	103119509	103130965	103131021	25991	31,43,8,20	0,0,13,0	26,44,23,32	0,0,0,0	174	149	0.0181051	0.230225	1.0,1.0,0.345,1.0	1.0,1.0,1.0,1.0	-0.164	0.164
25995	ENSMUSG00000001768.16	Rin2	chr2	+	145701196	145701322	145675366	145675584	145712454	145712578	25995	0,2,7,14	8,18,8,0	0,1,1,2	8,12,10,6	275	149	0.0030682	0.0592237	0.0,0.057,0.322,1.0	0.0,0.043,0.051,0.153	0.283	0.283
25996	ENSMUSG00000001768.16	Rin2	chr2	+	145737382	145737454	145712454	145712578	145786321	145787327	25996	1,6,9,1	6,7,0,2	3,26,13,12	0,5,5,0	221	149	0.0137278	0.187492	0.101,0.366,1.0,0.252	1.0,0.778,0.637,1.0	-0.424	0.424
26026	ENSMUSG00000094786.1	Gm14403	chr2	+	177507242	177507303	177506908	177507035	177508453	177509471	26026	33,20,20,9	12,6,4,3	20,5,33,31	0,1,1,5	210	149	0.000286421	0.00925593	0.661,0.703,0.78,0.68	1.0,0.78,0.959,0.815	-0.182	0.182
26055	ENSMUSG00000063364.10	3300002I08Rik	chr2	-	150360110	150360192	150344579	150344706	150362587	150362742	26055	2,1,0,0	0,11,5,9	4,4,1,2	8,0,0,4	231	149	0.00216634	0.044846	1.0,0.055,0.0,0.0	0.244,1.0,1.0,0.244	-0.358	0.358
26099	ENSMUSG00000024921.17	Smarca2	chr19	+	26759877	26759931	26751823	26752041	26770937	26771043	26099	23,32,23,49	34,61,24,63	79,39,74,65	46,47,66,71	203	149	0.019583	0.244061	0.332,0.278,0.413,0.363	0.558,0.379,0.451,0.402	-0.101	0.101
26100	ENSMUSG00000024921.17	Smarca2	chr19	+	26759877	26759931	26751823	26752041	26771507	26771609	26100	6,6,10,16	7,3,2,10	20,13,25,19	4,2,8,4	203	149	0.0374156	0.393024	0.386,0.595,0.786,0.54	0.786,0.827,0.696,0.777	-0.195	0.195
26160	ENSMUSG00000030516.14	Tjp1	chr7	-	65314092	65314332	65312554	65313424	65314658	65315009	26160	48,39,48,46	25,31,39,19	64,54,71,68	24,15,18,4	298	149	0.00029105	0.00934695	0.49,0.386,0.381,0.548	0.571,0.643,0.664,0.895	-0.242	0.242
26169	ENSMUSG00000026803.17	Ttf1	chr2	+	29081011	29081077	29079388	29079478	29083532	29083618	26169	11,27,16,32	5,0,0,2	14,13,19,6	0,0,0,0	215	149	0.0308269	0.339004	0.604,1.0,1.0,0.917	1.0,1.0,1.0,1.0	-0.12	0.12
26194	ENSMUSG00000058318.15	Phf21a	chr2	+	92187043	92187408	92184267	92184352	92214048	92214089	26194	2,6,3,6	14,11,0,17	0,1,3,0	11,5,21,6	298	149	0.0012202	0.02858	0.067,0.214,1.0,0.15	0.0,0.091,0.067,0.0	0.318	0.318
26201	ENSMUSG00000058318.15	Phf21a	chr2	+	92326915	92327164	92320228	92320459	92328314	92328401	26201	8,5,8,18	5,20,17,1	17,8,10,20	3,1,9,1	298	149	0.0314418	0.343423	0.444,0.111,0.19,0.9	0.739,0.8,0.357,0.909	-0.29	0.29
26213	ENSMUSG00000039678.12	Tbc1d13	chr2	+	30136672	30136713	30134796	30134870	30137120	30137182	26213	23,22,24,36	0,7,6,4	14,20,17,18	2,0,0,1	190	149	0.000130727	0.00501664	1.0,0.711,0.758,0.876	0.846,1.0,1.0,0.934	-0.109	0.109
26214	ENSMUSG00000039678.12	Tbc1d13	chr2	+	30136672	30136713	30135408	30135552	30137120	30137182	26214	27,24,22,30	3,6,19,1	28,20,25,24	4,0,4,1	190	149	0.0258897	0.297789	0.876,0.758,0.476,0.959	0.846,1.0,0.831,0.95	-0.139	0.139
26297	ENSMUSG00000038241.16	Cep250	chr2	+	155994570	155994684	155990215	155992774	155994844	155994991	26297	1,0,5,16	2,3,3,0	31,3,19,10	0,1,0,1	263	149	9.42326e-06	0.000591258	0.221,0.0,0.486,1.0	1.0,0.63,1.0,0.85	-0.443	0.443
26314	ENSMUSG00000074643.12	Cpne1	chr2	-	156103348	156103429	156079338	156079464	156111785	156111935	26314	15,21,7,31	39,15,29,17	16,2,7,12	27,57,24,26	230	149	0.0132965	0.183658	0.199,0.476,0.135,0.542	0.277,0.022,0.159,0.23	0.166	0.166
26396	ENSMUSG00000086437.2	Gm13021	chr4	+	140431536	140431631	140424591	140424688	140431791	140431931	26396	1,10,9,0	0,6,0,4	0,5,0,0	2,0,1,2	244	149	0.00384321	0.0699921	1.0,0.504,1.0,0.0	0.0,1.0,0.0,0.0	0.376	0.376
26464	ENSMUSG00000035268.14	Pkig	chr2	+	163659149	163659235	163658457	163658659	163703485	163703555	26464	3,2,14,1	2,0,2,0	1,0,0,10	0,2,5,2	235	149	0.000413362	0.0123951	0.487,1.0,0.816,1.0	1.0,0.0,0.0,0.76	0.386	0.386
26496	ENSMUSG00000044206.3	Vsig4	chrX	-	96290752	96290846	96269555	96269612	96293313	96293412	26496	61,256,85,179	7,10,14,7	69,59,89,88	2,0,2,0	243	149	1.10011e-06	0.000112133	0.842,0.94,0.788,0.94	0.955,1.0,0.965,1.0	-0.102	0.102
26504	ENSMUSG00000000826.16	Dnajc5	chr2	+	181548925	181549000	181548669	181548841	181549272	181552249	26504	44,39,45,56	119,127,143,67	43,52,57,58	42,67,61,64	224	149	2.44675e-05	0.00130365	0.197,0.17,0.173,0.357	0.405,0.34,0.383,0.376	-0.152	0.152
26505	ENSMUSG00000017760.16	Ctsa	chr2	+	164833723	164833850	164832900	164833196	164834029	164834208	26505	44,117,46,113	9,5,9,20	79,65,162,84	24,20,42,17	276	149	0.00444772	0.0789252	0.725,0.927,0.734,0.753	0.64,0.637,0.676,0.727	0.115	0.115
26506	ENSMUSG00000017760.16	Ctsa	chr2	+	164833772	164833850	164832908	164833196	164834029	164834062	26506	30,95,32,95	9,5,9,20	62,49,117,57	24,20,42,17	227	149	0.00376096	0.0689813	0.686,0.926,0.7,0.757	0.629,0.617,0.646,0.688	0.122	0.122
26507	ENSMUSG00000017760.16	Ctsa	chr2	+	164833807	164833850	164832925	164833196	164834029	164834208	26507	36,92,29,89	9,5,9,20	64,48,111,56	24,20,42,17	192	149	0.00215076	0.044585	0.756,0.935,0.714,0.775	0.674,0.651,0.672,0.719	0.116	0.116
26513	ENSMUSG00000039804.15	Ncoa5	chr2	-	165023145	165023201	165012996	165013162	165034682	165034829	26513	19,17,16,3	2,2,0,0	7,13,8,1	0,6,4,4	205	149	0.000327057	0.0102605	0.873,0.861,1.0,1.0	1.0,0.612,0.592,0.154	0.344	0.344
26514	ENSMUSG00000039804.15	Ncoa5	chr2	-	165023145	165023212	165012835	165013162	165034682	165034788	26514	44,32,36,6	2,2,0,0	12,31,25,11	0,6,4,4	216	149	0.000162785	0.00591253	0.938,0.917,1.0,1.0	1.0,0.781,0.812,0.655	0.152	0.152
26520	ENSMUSG00000068921.14	Dap3	chr3	-	88928446	88928527	88927010	88927070	88929395	88929526	26520	54,57,64,74	0,0,6,5	68,21,78,56	19,7,0,1	230	149	0.0323932	0.350695	1.0,1.0,0.874,0.906	0.699,0.66,1.0,0.973	0.112	0.112
26579	ENSMUSG00000005687.14	Bcas2	chr3	+	103175618	103175669	103174339	103174501	103177338	103177419	26579	125136143255	16,35,15,20	214163246172	6,0,2,0	200	149	0	0	0.853,0.743,0.877,0.905	0.964,1.0,0.989,1.0	-0.144	0.144
26626	ENSMUSG00000052056.14	Zfp217	chr2	-	170112479	170112614	170108642	170110655	170114060	170115572	26626	25,44,62,36	0,5,2,0	11,10,24,14	0,1,2,6	284	149	0.0432672	0.43938	1.0,0.822,0.942,1.0	1.0,0.84,0.863,0.55	0.128	0.128
26653	ENSMUSG00000055897.13	Ppp4r1l-ps	chr2	-	173581971	173582113	173579319	173581296	173586996	173587115	26653	0,1,0,2	2,2,3,0	4,4,1,1	0,6,1,0	291	149	0.00298609	0.0579845	0.0,0.204,0.0,1.0	1.0,0.254,0.339,1.0	-0.347	0.347
26706	ENSMUSG00000019906.15	Lin7a	chr10	+	107380226	107380303	107380079	107380151	107382503	107382713	26706	2,0,0,0	12,12,19,4	5,4,2,2	14,21,8,11	226	149	8.14848e-05	0.00346677	0.099,0.0,0.0,0.0	0.191,0.112,0.142,0.107	-0.113	0.113
26712	ENSMUSG00000001173.15	Ocrl	chrX	+	47931783	47931945	47931575	47931696	47933373	47933475	26712	17,26,13,20	6,2,3,2	39,10,42,19	0,0,0,0	298	149	1.63125e-08	3.50556e-06	0.586,0.867,0.684,0.833	1.0,1.0,1.0,1.0	-0.258	0.258
26726	ENSMUSG00000020718.12	Polg2	chr11	-	106778716	106778807	106777434	106777561	106779083	106779502	26726	0,3,0,2	5,6,6,6	4,3,5,0	4,1,9,9	240	149	0.027966	0.314517	0.0,0.237,0.0,0.171	0.383,0.651,0.256,0.0	-0.221	0.221
26734	ENSMUSG00000022420.16	Dnal4	chr15	-	79765786	79765853	79764815	79765021	79774358	79774622	26734	4,0,4,3	7,19,18,13	2,7,11,0	3,8,7,6	216	149	0.0181189	0.230286	0.283,0.0,0.133,0.137	0.315,0.376,0.52,0.0	-0.165	0.165
26755	ENSMUSG00000090733.6	Rps27	chr3	-	90213380	90213493	90213192	90213301	90213609	90213647	26755	24,8,13,4	0,0,0,0	5,10,9,7	0,0,275,0	262	149	0.00199118	0.0417468	1.0,1.0,1.0,1.0	1.0,1.0,0.018,1.0	0.246	0.246
26761	ENSMUSG00000061613.13	U2af1	chr17	-	31652501	31652568	31648844	31648894	31654978	31655066	26761	1,14,4,25	0,4,2,2	3,5,9,0	0,1,0,1	216	149	0.0183586	0.232306	1.0,0.707,0.58,0.896	1.0,0.775,1.0,0.0	0.102	0.102
26784	ENSMUSG00000059013.12	Sh2d3c	chr2	+	32732791	32732925	32727705	32727806	32737518	32737558	26784	0,3,0,2	5,0,8,4	2,4,4,6	0,17,28,0	283	149	0.0359433	0.381286	0.0,1.0,0.0,0.208	1.0,0.11,0.07,1.0	-0.243	0.243
26794	ENSMUSG00000039069.19	Mtg2	chr2	+	180073139	180073233	180071793	180071886	180082085	180082233	26794	7,9,3,2	2,0,3,6	17,14,3,9	0,1,0,0	243	149	8.27183e-07	8.77835e-05	0.682,1.0,0.38,0.17	1.0,0.896,1.0,1.0	-0.416	0.416
26810	ENSMUSG00000039286.12	Fndc3b	chr3	-	27682737	27682814	27642950	27643089	27711119	27711307	26810	3,3,5,1	15,16,18,3	0,2,0,0	6,24,18,5	226	149	0.000109526	0.00435873	0.116,0.11,0.155,0.18	0.0,0.052,0.0,0.0	0.127	0.127
26848	ENSMUSG00000028211.11	Trp53inp1	chr4	+	11167896	11167934	11165089	11165447	11169709	11174379	26848	186100123121	179190132153	162121174169	86,67,112,93	187	149	1.34487e-08	3.04224e-06	0.453,0.295,0.426,0.387	0.6,0.59,0.553,0.591	-0.193	0.193
26971	ENSMUSG00000039782.15	Cpeb2	chr5	+	43238326	43238416	43237306	43237588	43244585	43244676	26971	19,14,9,16	40,62,41,72	43,27,27,48	50,30,51,85	239	149	6.33211e-06	0.000428589	0.228,0.123,0.12,0.122	0.349,0.359,0.248,0.26	-0.156	0.156
27035	ENSMUSG00000056941.17	Commd7	chr2	-	153632187	153632262	153629192	153629246	153632593	153632740	27035	6,3,6,0	41,33,37,26	11,8,10,15	26,65,42,18	224	149	0.000866335	0.0219676	0.089,0.057,0.097,0.0	0.22,0.076,0.137,0.357	-0.137	0.137
27066	ENSMUSG00000022723.16	Crybg3	chr16	-	59552171	59552287	59550401	59550549	59552529	59552574	27066	12,13,10,21	4,0,2,0	21,21,20,10	1,0,0,0	265	149	0.0497812	0.486825	0.628,1.0,0.738,1.0	0.922,1.0,1.0,1.0	-0.139	0.139
27075	ENSMUSG00000020220.16	Vps13d	chr4	-	145152646	145152798	145148316	145149348	145154568	145155486	27075	57,75,58,70	9,0,5,8	151,103,124,70	2,0,0,0	298	149	4.33228e-09	1.15176e-06	0.76,1.0,0.853,0.814	0.974,1.0,1.0,1.0	-0.137	0.137
27102	ENSMUSG00000024386.9	Proc	chr18	-	32137546	32137610	32135860	32135947	32137947	32138026	27102	3,0,1,7	1,2,4,0	10,8,7,6	0,0,4,0	213	149	0.00252992	0.0507968	0.677,0.0,0.149,1.0	1.0,1.0,0.55,1.0	-0.431	0.431
27106	ENSMUSG00000024386.9	Proc	chr18	-	32137546	32137610	32135860	32135951	32138128	32138182	27106	179,89,116,102	146,102,135,69	96,93,161,78	138228144143	213	149	0.00473015	0.0828113	0.462,0.379,0.375,0.508	0.327,0.222,0.439,0.276	0.115	0.115
27146	ENSMUSG00000026335.16	Pam	chr1	-	97822935	97822989	97821093	97821988	97825836	97826037	27146	104,72,30,129	5,44,10,30	25,42,56,44	6,6,6,4	203	149	0.0476692	0.472079	0.939,0.546,0.688,0.759	0.754,0.837,0.873,0.89	-0.106	0.106
27255	ENSMUSG00000042594.16	Sh2b3	chr5	-	121832502	121832590	121828401	121829076	121836549	121836859	27255	33,7,13,2	35,32,26,19	11,24,29,20	15,26,19,5	237	149	0.00173272	0.0373294	0.372,0.121,0.239,0.062	0.316,0.367,0.49,0.715	-0.273	0.273
27264	ENSMUSG00000029528.19	Pxn	chr5	+	115550120	115550387	115546812	115546948	115551487	115551589	27264	1,2,3,2	14,13,12,0	0,0,0,0	1,14,3,5	298	149	0.0426496	0.435104	0.034,0.071,0.111,1.0	0.0,0.0,0.0,0.0	0.304	0.304
27316	ENSMUSG00000026672.11	Optn	chr2	-	5062858	5062987	5054539	5054716	5063906	5064051	27316	22,15,38,38	100,53,97,60	23,42,64,54	52,161,51,29	278	149	0.0210402	0.257253	0.105,0.132,0.174,0.253	0.192,0.123,0.402,0.5	-0.138	0.138
27334	ENSMUSG00000029761.16	Cald1	chr6	+	34747891	34747969	34745618	34746639	34753442	34753588	27334	31,43,38,0	182,112,195,41	43,28,17,5	37,103,50,31	227	149	0.022345	0.268265	0.101,0.201,0.113,0.0	0.433,0.151,0.182,0.096	-0.112	0.112
27367	ENSMUSG00000039345.16	Mettl22	chr16	+	8482126	8482167	8477966	8478329	8482255	8482400	27367	7,16,16,13	0,6,2,8	24,10,28,16	0,0,0,0	190	149	1.8952e-08	3.9414e-06	1.0,0.677,0.863,0.56	1.0,1.0,1.0,1.0	-0.225	0.225
27380	ENSMUSG00000049550.17	Clip1	chr5	-	123638955	123638988	123635173	123635278	123640493	123640554	27380	0,6,1,5	5,0,10,11	4,4,9,2	0,11,0,0	182	149	0.0009491	0.0235494	0.0,1.0,0.076,0.271	1.0,0.229,1.0,1.0	-0.471	0.471
27413	ENSMUSG00000049327.17	Kmt5a	chr5	+	124445968	124446084	124445504	124445728	124447213	124447370	27413	21,44,24,23	32,57,40,56	1,10,4,0	42,30,43,47	265	149	2.09088e-12	1.2838e-09	0.27,0.303,0.252,0.188	0.013,0.158,0.05,0.0	0.198	0.198
27454	ENSMUSG00000014668.15	Chfr	chr5	+	110136482	110136652	110136050	110136194	110140116	110140189	27454	6,1,1,0	8,6,6,9	0,0,0,0	2,10,11,8	298	149	0.00652931	0.105831	0.273,0.077,0.077,0.0	0.0,0.0,0.0,0.0	0.107	0.107
27485	ENSMUSG00000029428.13	Stx2	chr5	-	128987717	128987842	128984556	128986430	128988801	128988912	27485	52,54,28,60	10,19,18,18	17,22,50,16	27,19,23,9	274	149	0.00775662	0.121745	0.739,0.607,0.458,0.644	0.255,0.386,0.542,0.492	0.193	0.193
27496	ENSMUSG00000034442.11	Trmt5	chr12	-	73281004	73281656	73280010	73280632	73282611	73282736	27496	31,41,45,53	3,0,0,4	25,29,59,10	6,6,0,2	298	149	0.0119483	0.169038	0.838,1.0,1.0,0.869	0.676,0.707,1.0,0.714	0.152	0.152
27506	ENSMUSG00000034173.13	Zbed5	chr5	+	129899002	129899093	129895777	129895852	129899182	129899432	27506	1,0,13,2	12,3,9,9	15,17,13,14	2,5,10,2	240	149	7.74939e-06	0.000507212	0.049,0.0,0.473,0.121	0.823,0.679,0.447,0.813	-0.53	0.53
27569	ENSMUSG00000060261.15	Gtf2i	chr5	-	134272523	134272586	134266542	134266656	134279436	134279514	27569	24,22,10,9	0,6,2,7	30,23,10,21	11,17,24,13	212	149	0.00540601	0.0912968	1.0,0.72,0.778,0.475	0.657,0.487,0.227,0.532	0.268	0.268
27570	ENSMUSG00000060261.15	Gtf2i	chr5	-	134274538	134274595	134266542	134266656	134279436	134279514	27570	48,40,13,92	0,6,2,7	85,41,43,66	11,17,24,13	206	149	6.2026e-05	0.0027745	1.0,0.828,0.825,0.905	0.848,0.636,0.564,0.786	0.181	0.181
27652	ENSMUSG00000048668.16	Rhno1	chr6	-	128362057	128362184	128359105	128359354	128362367	128362812	27652	6,0,6,4	3,6,3,0	1,1,0,2	12,1,6,0	276	149	0.0133214	0.183707	0.519,0.0,0.519,1.0	0.043,0.351,0.0,1.0	0.161	0.161
27658	ENSMUSG00000020593.16	Lpin1	chr12	-	16571163	16571262	16568389	16568519	16573659	16573785	27658	39,60,182,44	14,18,42,18	143115219144	16,21,17,17	248	149	3.43055e-06	0.000265441	0.626,0.667,0.722,0.595	0.843,0.767,0.886,0.836	-0.18	0.18
27692	ENSMUSG00000059518.14	Znhit1	chr5	-	136986125	136986255	136984878	136985049	136987488	136987508	27692	21,18,13,15	24,28,23,34	22,21,51,35	30,9,49,30	279	149	0.0174973	0.225167	0.318,0.256,0.232,0.191	0.281,0.555,0.357,0.384	-0.145	0.145
27842	ENSMUSG00000028772.19	Zcchc17	chr4	-	130337073	130337169	130329573	130329674	130338483	130338584	27842	27,44,15,48	4,0,5,5	31,21,51,36	0,0,1,0	245	149	3.32299e-06	0.000258892	0.804,1.0,0.646,0.854	1.0,1.0,0.969,1.0	-0.166	0.166
27856	ENSMUSG00000089889.2	0610040B10Rik	chr5	+	143330703	143330885	143329326	143329353	143332310	143332701	27856	3,7,0,26	0,7,4,6	8,29,20,22	0,1,3,0	298	149	5.97437e-05	0.00270768	1.0,0.333,0.0,0.684	1.0,0.935,0.769,1.0	-0.422	0.422
27898	ENSMUSG00000031365.13	Zfp275	chrX	+	73351268	73351360	73344836	73344912	73351808	73351923	27898	1,13,6,6	2,12,19,11	12,7,13,9	2,3,9,7	241	149	0.00262211	0.0521349	0.236,0.401,0.163,0.252	0.788,0.591,0.472,0.443	-0.31	0.31
27909	ENSMUSG00000007812.16	Zfp655	chr5	+	145235305	145235391	145233440	145233602	145242919	145243024	27909	33,11,57,21	42,36,19,47	57,47,38,33	25,41,27,16	235	149	0.0368215	0.388047	0.333,0.162,0.655,0.221	0.591,0.421,0.472,0.567	-0.17	0.17
27963	ENSMUSG00000061740.8	Cyp2d22	chr15	-	82373903	82374056	82373672	82373833	82374297	82374469	27963	516516703637	57,50,71,27	977,697,1522,842	0,4,0,0	298	149	0	0	0.819,0.838,0.832,0.922	1.0,0.989,1.0,1.0	-0.144	0.144
27971	ENSMUSG00000041264.16	Uspl1	chr5	+	149187707	149187876	149184559	149184806	149188344	149188473	27971	35,14,12,6	17,16,7,21	4,6,4,5	8,21,8,8	298	149	0.0152663	0.203561	0.507,0.304,0.462,0.125	0.2,0.125,0.2,0.238	0.159	0.159
28022	ENSMUSG00000032415.14	Ube2cbp	chr9	-	86372340	86372479	86307305	86307876	86422840	86423004	28022	11,24,14,27	2,0,10,0	27,15,29,38	0,0,0,0	288	149	9.29122e-05	0.0038214	0.74,1.0,0.42,1.0	1.0,1.0,1.0,1.0	-0.21	0.21
28070	ENSMUSG00000032827.15	Ppp1r9a	chr6	+	5157003	5157027	5156120	5156240	5158088	5158271	28070	0,0,0,0	7,6,7,18	12,0,0,0	0,6,7,11	173	149	0.0317583	0.345416	0.0,0.0,0.0,0.0	1.0,0.0,0.0,0.0	-0.25	0.25
28076	ENSMUSG00000002588.13	Pon1	chr6	-	5181438	5181565	5171782	5171869	5185297	5185353	28076	2,11,3,15	16,11,9,16	13,19,23,6	6,6,5,3	276	149	9.04748e-06	0.000574671	0.063,0.351,0.153,0.336	0.539,0.631,0.713,0.519	-0.375	0.375
28140	ENSMUSG00000029629.17	Phf14	chr6	+	12047826	12047944	12006984	12007106	12080996	12081100	28140	42,29,23,14	0,0,6,2	46,70,35,48	0,0,1,0	267	149	0.00499893	0.0866348	1.0,1.0,0.681,0.796	1.0,1.0,0.951,1.0	-0.118	0.118
28146	ENSMUSG00000066258.13	Trim12a	chr7	-	104305998	104306094	104303590	104304386	104306911	104307387	28146	22,16,36,53	0,0,3,0	7,16,20,17	2,0,0,6	245	149	0.00504623	0.0871032	1.0,1.0,0.879,1.0	0.68,1.0,1.0,0.633	0.141	0.141
28166	ENSMUSG00000029569.9	Tmem168	chr6	-	13606923	13607084	13605934	13605959	13607829	13608044	28166	9,8,9,1	0,0,0,1	0,3,2,6	5,0,5,0	298	149	0.000294616	0.00940291	1.0,1.0,1.0,0.333	0.0,1.0,0.167,1.0	0.292	0.292
28301	ENSMUSG00000029782.19	Tmem209	chr6	-	30482595	30482985	30479052	30481137	30487374	30487448	28301	26,47,39,41	2,4,8,0	39,17,27,24	0,0,0,1	298	149	8.4425e-06	0.000542439	0.867,0.855,0.709,1.0	1.0,1.0,1.0,0.923	-0.123	0.123
28302	ENSMUSG00000029782.19	Tmem209	chr6	-	30482856	30482985	30481021	30481137	30487374	30487448	28302	28,39,34,39	2,4,8,0	38,16,14,22	0,0,0,1	278	149	1.03931e-05	0.000642726	0.882,0.839,0.695,1.0	1.0,1.0,1.0,0.922	-0.127	0.127
28311	ENSMUSG00000070056.6	Mfhas1	chr8	+	35671721	35671831	35664667	35664794	35676729	35677020	28311	8,3,0,6	10,13,17,13	0,5,0,0	13,17,8,5	259	149	0.00422438	0.0755991	0.315,0.117,0.0,0.21	0.0,0.145,0.0,0.0	0.124	0.124
28387	ENSMUSG00000073155.12	1810058I24Rik	chr6	+	35252955	35253045	35252715	35252782	35260409	35260463	28387	48,37,47,51	148,103,0,63	7,11,54,37	101,101,72,63	239	149	0.011483	0.165063	0.168,0.183,1.0,0.335	0.041,0.064,0.319,0.268	0.248	0.248
28427	ENSMUSG00000029823.16	Luc7l2	chr6	+	38559203	38559304	38554979	38555063	38570509	38570604	28427	2,0,0,2	1,6,2,3	4,2,4,0	5,0,0,1	250	149	0.0013844	0.0314823	0.544,0.0,0.0,0.284	0.323,1.0,1.0,0.0	-0.374	0.374
28434	ENSMUSG00000029823.16	Luc7l2	chr6	+	38568846	38568917	38559203	38559304	38570509	38570604	28434	12,5,12,24	2,0,0,0	3,23,12,10	1,3,0,2	220	149	0.0477181	0.472381	0.803,1.0,1.0,1.0	0.67,0.839,1.0,0.772	0.131	0.131
28445	ENSMUSG00000029925.13	Tbxas1	chr6	+	39001251	39001368	38982120	38982217	39017891	39017980	28445	21,62,27,54	1,0,0,0	11,13,13,8	0,5,0,4	266	149	9.22949e-05	0.00380816	0.922,1.0,1.0,1.0	1.0,0.593,1.0,0.528	0.2	0.2
28474	ENSMUSG00000041481.17	Serpina3g	chr12	+	104237194	104237286	104236244	104236318	104237877	104238259	28474	2,12,2,15	2,9,2,7	4,14,12,4	0,1,0,2	241	149	3.93661e-06	0.000292557	0.382,0.452,0.382,0.57	1.0,0.896,1.0,0.553	-0.416	0.416
28476	ENSMUSG00000041481.17	Serpina3g	chr12	+	104237795	104238344	104236251	104236318	104239034	104239308	28476	36,52,63,79	6,0,2,18	35,51,18,33	0,1,0,0	298	149	4.78516e-07	5.73953e-05	0.75,1.0,0.94,0.687	1.0,0.962,1.0,1.0	-0.146	0.146
28477	ENSMUSG00000041481.17	Serpina3g	chr12	+	104237937	104238344	104236258	104236318	104239034	104239305	28477	36,52,68,79	6,0,2,18	35,55,18,33	0,1,0,0	298	149	4.93071e-07	5.88673e-05	0.75,1.0,0.944,0.687	1.0,0.965,1.0,1.0	-0.146	0.146
28506	ENSMUSG00000024187.15	Fam234a	chr17	-	26225911	26226023	26220280	26220580	26244005	26244223	28506	70,56,59,62	29,55,33,42	62,64,77,63	64,64,90,55	261	149	0.010368	0.15287	0.579,0.368,0.505,0.457	0.356,0.363,0.328,0.395	0.117	0.117
28507	ENSMUSG00000024187.15	Fam234a	chr17	-	26225927	26226023	26220280	26220580	26244005	26244168	28507	34,33,29,44	29,55,33,42	13,34,35,38	64,64,90,55	245	149	0.000689963	0.0182714	0.416,0.267,0.348,0.389	0.11,0.244,0.191,0.296	0.145	0.145
28515	ENSMUSG00000003119.14	Cdk12	chr11	+	98249709	98250100	98245216	98245669	98263469	98263570	28515	31,28,28,16	0,2,4,1	33,15,32,23	7,4,1,5	298	149	0.0199402	0.24722	1.0,0.875,0.778,0.889	0.702,0.652,0.941,0.697	0.137	0.137
28536	ENSMUSG00000029863.13	Casp2	chr6	+	42276694	42276785	42273916	42274045	42279776	42279897	28536	39,48,14,25	1,4,0,0	18,5,11,22	6,2,0,1	240	149	0.0157801	0.208151	0.96,0.882,1.0,1.0	0.651,0.608,1.0,0.932	0.163	0.163
28639	ENSMUSG00000042810.14	Krba1	chr6	+	48408528	48408726	48407672	48407822	48409169	48409343	28639	21,29,50,30	0,0,10,4	15,37,22,21	0,1,0,0	298	149	1.41505e-05	0.000829348	1.0,1.0,0.714,0.789	1.0,0.949,1.0,1.0	-0.111	0.111
28643	ENSMUSG00000068551.12	Zfp467	chr6	-	48443411	48443487	48442624	48442738	48445352	48445358	28643	29,49,46,96	2,10,10,19	85,56,131,120	0,7,14,6	225	149	0.000676168	0.0180695	0.906,0.764,0.753,0.77	1.0,0.841,0.861,0.93	-0.11	0.11
28755	ENSMUSG00000030798.15	Cd37	chr7	-	45238659	45238734	45238499	45238572	45238959	45239115	28755	9,8,6,20	3,7,3,0	5,18,5,7	4,0,0,0	224	149	0.00588023	0.0977687	0.666,0.432,0.571,1.0	0.454,1.0,1.0,1.0	-0.196	0.196
28781	ENSMUSG00000029780.14	Nt5c3	chr6	-	56897774	56897829	56892789	56892888	56923671	56923819	28781	27,16,18,16	63,47,41,55	5,4,24,2	65,70,39,40	204	149	0.000838499	0.0213668	0.238,0.199,0.243,0.175	0.053,0.04,0.31,0.035	0.104	0.104
28840	ENSMUSG00000030960.16	Eef1akmt2	chr7	-	132831359	132831576	132827456	132827882	132837099	132837207	28840	21,25,22,28	0,2,0,9	35,23,29,16	0,0,0,0	298	149	4.06359e-05	0.00198094	1.0,0.862,1.0,0.609	1.0,1.0,1.0,1.0	-0.132	0.132
29024	ENSMUSG00000053470.13	Kdm3a	chr6	-	71616817	71616870	71613831	71613995	71619957	71620046	29024	0,0,0,3	11,36,31,21	2,3,0,5	8,20,20,11	202	149	0.00134971	0.0308566	0.0,0.0,0.0,0.095	0.156,0.1,0.0,0.251	-0.103	0.103
29048	ENSMUSG00000056305.4	Usp39	chr6	-	72342898	72342968	72339966	72340061	72344884	72345184	29048	27,29,10,16	26,6,20,21	49,67,53,35	0,0,0,0	219	149	0	0	0.414,0.767,0.254,0.341	1.0,1.0,1.0,1.0	-0.556	0.556
29058	ENSMUSG00000056698.11	Elmod3	chr6	-	72596435	72596466	72594739	72595020	72597623	72597645	29058	11,8,28,18	4,2,0,7	6,24,23,17	0,0,1,0	180	149	2.41177e-06	0.000203251	0.695,0.768,1.0,0.68	1.0,1.0,0.95,1.0	-0.202	0.202
29060	ENSMUSG00000056698.11	Elmod3	chr6	-	72597623	72597645	72594739	72595020	72598321	72598361	29060	4,0,0,7	9,4,20,5	0,0,1,0	10,21,7,16	171	149	0.000190323	0.006705	0.279,0.0,0.0,0.55	0.0,0.0,0.111,0.0	0.18	0.18
29089	ENSMUSG00000055799.13	Tcf7l1	chr6	-	72648800	72648842	72634099	72634232	72649119	72649203	29089	4,3,21,0	12,22,6,14	9,6,2,7	4,9,0,5	191	149	0.0223177	0.268062	0.206,0.096,0.732,0.0	0.637,0.342,1.0,0.522	-0.367	0.367
29136	ENSMUSG00000044477.12	Zfand3	chr17	+	30060809	30060850	30004732	30005308	30135322	30135505	29136	115134113245	85,48,49,82	131119232137	14,35,55,43	190	149	0.000873611	0.0220869	0.515,0.686,0.644,0.701	0.88,0.727,0.768,0.714	-0.136	0.136
29172	ENSMUSG00000068329.12	Htra2	chr6	-	83052697	83052726	83052472	83052542	83053000	83053070	29172	0,24,2,6	3,6,5,0	2,8,11,7	0,1,2,0	178	149	0.000213993	0.00730921	0.0,0.77,0.251,1.0	1.0,0.87,0.822,1.0	-0.418	0.418
29205	ENSMUSG00000042787.15	Exog	chr9	+	119445286	119445321	119444959	119445150	119446948	119447098	29205	1,2,8,0	2,3,3,5	4,0,1,7	2,1,0,0	184	149	0.000607627	0.0165639	0.288,0.351,0.683,0.0	0.618,0.0,1.0,1.0	-0.324	0.324
29206	ENSMUSG00000042787.15	Exog	chr9	+	119445687	119445801	119444986	119445150	119446948	119447098	29206	0,6,0,12	2,3,3,5	2,2,2,4	2,1,0,0	263	149	0.000778249	0.0202226	0.0,0.531,0.0,0.576	0.362,0.531,1.0,1.0	-0.446	0.446
29225	ENSMUSG00000055546.6	Timd4	chr11	+	46839260	46839348	46819990	46820044	46843118	46844332	29225	2,17,4,5	2,4,2,1	11,2,9,4	0,0,0,0	237	149	1.18224e-06	0.00011726	0.386,0.728,0.557,0.759	1.0,1.0,1.0,1.0	-0.393	0.393
29226	ENSMUSG00000055546.6	Timd4	chr11	+	46842155	46842195	46819990	46820044	46843118	46844332	29226	6,25,17,18	2,4,2,1	15,12,10,4	0,0,0,0	189	149	0.000239488	0.00802399	0.703,0.831,0.87,0.934	1.0,1.0,1.0,1.0	-0.165	0.165
29232	ENSMUSG00000030016.14	Zfp638	chr6	+	83928652	83930165	83914372	83914479	83934948	83935010	29232	18,34,23,35	5,0,6,0	44,33,54,53	0,1,4,0	298	149	0.00730918	0.116639	0.643,1.0,0.657,1.0	1.0,0.943,0.871,1.0	-0.129	0.129
29243	ENSMUSG00000030016.14	Zfp638	chr6	+	83981683	83981785	83978993	83979909	83983975	83984074	29243	10,2,2,13	17,20,17,20	4,14,8,14	17,11,13,10	251	149	0.0394925	0.410824	0.259,0.056,0.065,0.278	0.123,0.43,0.268,0.454	-0.154	0.154
29301	ENSMUSG00000057230.14	Aak1	chr6	+	86959031	86959274	86956258	86956572	86963992	86964225	29301	23,21,9,13	3,6,9,11	6,9,12,7	0,2,5,0	298	149	0.0417839	0.428754	0.793,0.636,0.333,0.371	1.0,0.692,0.545,1.0	-0.276	0.276
29387	ENSMUSG00000002871.14	Tpra1	chr6	+	88908250	88908316	88907940	88908072	88909289	88909376	29387	16,28,10,21	1,0,0,6	27,6,15,17	2,5,8,2	215	149	0.0196953	0.245009	0.917,1.0,1.0,0.708	0.903,0.454,0.565,0.855	0.212	0.212
29433	ENSMUSG00000066037.14	Hnrnpr	chr4	+	136314086	136314255	136311590	136311747	136316360	136316479	29433	38,30,39,29	0,4,10,7	40,32,41,50	0,0,0,1	298	149	1.14695e-08	2.64085e-06	1.0,0.789,0.661,0.674	1.0,1.0,1.0,0.962	-0.209	0.209
29435	ENSMUSG00000066037.14	Hnrnpr	chr4	+	136314089	136314255	136311684	136311747	136316360	136316423	29435	38,29,41,29	0,4,10,7	40,32,42,50	0,0,0,1	298	149	1.10186e-08	2.55989e-06	1.0,0.784,0.672,0.674	1.0,1.0,1.0,0.962	-0.208	0.208
29442	ENSMUSG00000072704.6	Smim10l1	chr6	+	133106362	133106530	133105289	133105605	133110792	133110899	29442	14,21,16,16	15,7,25,14	27,19,29,36	10,12,11,12	298	149	0.0206347	0.253877	0.318,0.6,0.242,0.364	0.574,0.442,0.569,0.6	-0.165	0.165
29443	ENSMUSG00000072704.6	Smim10l1	chr6	+	133107863	133107982	133105255	133105605	133110792	133110897	29443	17,24,23,13	15,7,25,14	54,35,37,35	10,12,11,12	268	149	0.00159575	0.0351814	0.387,0.656,0.338,0.34	0.75,0.619,0.652,0.619	-0.23	0.23
29502	ENSMUSG00000059439.15	Bcas3	chr11	+	85813999	85814065	85801784	85801952	85825201	85826058	29502	0,3,2,8	14,32,23,41	7,10,10,4	14,33,31,30	215	149	0.00524724	0.089667	0.0,0.061,0.057,0.119	0.257,0.174,0.183,0.085	-0.115	0.115
29558	ENSMUSG00000030067.17	Foxp1	chr6	-	99520596	99520732	99435235	99435345	99522547	99522721	29558	4,7,6,2	0,3,6,1	14,14,8,8	0,0,3,0	285	149	0.000173726	0.00623095	1.0,0.55,0.343,0.511	1.0,1.0,0.582,1.0	-0.294	0.294
29594	ENSMUSG00000006673.14	Qrich1	chr9	+	108518766	108518826	108517086	108517240	108528588	108528859	29594	29,15,11,22	35,77,42,57	4,25,18,11	9,33,27,1	209	149	0.0406112	0.420764	0.371,0.122,0.157,0.216	0.241,0.351,0.322,0.887	-0.234	0.234
29612	ENSMUSG00000030102.11	Itpr1	chr6	+	108432645	108432696	108417876	108418000	108438299	108438432	29612	0,1,7,0	17,19,17,22	17,16,3,3	26,37,39,22	200	149	0.003297	0.0625433	0.0,0.038,0.235,0.0	0.328,0.244,0.054,0.092	-0.111	0.111
29625	ENSMUSG00000024201.12	Kdm4b	chr17	+	56389258	56389342	56386082	56386279	56389484	56389672	29625	23,17,11,14	0,6,15,2	17,22,38,20	2,0,1,0	233	149	1.1945e-05	0.000711402	1.0,0.644,0.319,0.817	0.845,1.0,0.96,1.0	-0.256	0.256
29650	ENSMUSG00000034269.12	Setd5	chr6	+	113105916	113106141	113104934	113105121	113109423	113109616	29650	48,67,53,27	8,4,8,5	46,29,22,34	0,5,0,0	298	149	0.000386266	0.0116503	0.75,0.893,0.768,0.73	1.0,0.744,1.0,1.0	-0.151	0.151
29697	ENSMUSG00000031169.13	Porcn	chrX	-	8201443	8201569	8201175	8201276	8203158	8203289	29697	1,10,8,9	0,0,8,0	13,15,14,12	0,0,0,0	275	149	0.0216521	0.262389	1.0,1.0,0.351,1.0	1.0,1.0,1.0,1.0	-0.162	0.162
29791	ENSMUSG00000041477.14	Dcp1b	chr6	+	119180064	119180105	119175252	119175442	119183649	119183777	29791	13,7,6,4	8,0,0,0	11,4,4,20	0,0,0,0	190	149	0.00660836	0.107046	0.56,1.0,1.0,1.0	1.0,1.0,1.0,1.0	-0.11	0.11
29922	ENSMUSG00000039585.15	Myo9a	chr9	+	59875201	59875414	59874601	59874683	59884479	59884592	29922	8,0,2,11	6,13,6,2	0,7,0,0	1,1,4,5	298	149	0.0320255	0.347707	0.4,0.0,0.143,0.733	0.0,0.778,0.0,0.0	0.124	0.124
29961	ENSMUSG00000008153.12	Clstn3	chr6	-	124432686	124432925	124431957	124432160	124433407	124433500	29961	12,5,9,16	0,0,0,0	10,25,12,13	6,5,0,1	298	149	7.64598e-07	8.3196e-05	1.0,1.0,1.0,1.0	0.455,0.714,1.0,0.867	0.241	0.241
30000	ENSMUSG00000038346.18	Zfp384	chr6	+	125031670	125031853	125030797	125031022	125033239	125033318	30000	42,35,34,26	52,33,40,54	65,38,38,39	26,28,16,28	298	149	6.98691e-05	0.00304356	0.288,0.347,0.298,0.194	0.556,0.404,0.543,0.411	-0.197	0.197
30001	ENSMUSG00000038346.18	Zfp384	chr6	+	125031670	125032612	125030797	125031022	125033239	125033318	30001	10,13,18,6	52,33,40,54	35,12,13,18	26,28,16,28	298	149	5.64182e-05	0.00257052	0.088,0.165,0.184,0.053	0.402,0.176,0.289,0.243	-0.155	0.155
30012	ENSMUSG00000026932.14	Nacc2	chr2	-	26089542	26090482	26064369	26064618	26122688	26122818	30012	40,27,32,19	0,2,2,0	13,29,18,9	0,6,5,0	298	149	0.00135913	0.0310444	1.0,0.871,0.889,1.0	1.0,0.707,0.643,1.0	0.103	0.103
30066	ENSMUSG00000002395.14	Use1	chr8	+	71367497	71367693	71367216	71367369	71367769	71367848	30066	132160125173	20,6,18,13	153165137127	0,0,4,2	298	149	3.07776e-12	1.74751e-09	0.767,0.93,0.776,0.869	1.0,1.0,0.945,0.969	-0.143	0.143
30161	ENSMUSG00000045636.16	Mtus1	chr8	-	41056534	41056684	41049984	41050116	41076231	41076427	30161	21,30,38,66	41,43,66,77	63,40,99,114	66,49,101,68	298	149	0.00603602	0.09978	0.204,0.259,0.224,0.3	0.323,0.29,0.329,0.456	-0.103	0.103
30203	ENSMUSG00000118346.1	Tmem179b	chr19	-	8773504	8773622	8773289	8773424	8774334	8774467	30203	17,35,15,47	4,15,4,7	70,34,27,43	4,4,5,5	267	149	0.00678048	0.109421	0.703,0.566,0.677,0.789	0.907,0.826,0.751,0.828	-0.144	0.144
30248	ENSMUSG00000030187.15	Klra2	chr6	-	131245214	131245378	131243895	131243985	131247248	131247362	30248	20,29,7,12	0,0,0,0	16,3,16,2	0,1,4,3	298	149	8.27762e-05	0.0034994	1.0,1.0,1.0,1.0	1.0,0.6,0.667,0.25	0.371	0.371
30252	ENSMUSG00000050471.17	Fam118b	chr9	-	35227163	35227391	35223613	35223742	35235230	35235483	30252	18,12,22,62	0,0,0,7	30,17,15,17	2,6,11,8	298	149	5.66924e-05	0.00257846	1.0,1.0,1.0,0.816	0.882,0.586,0.405,0.515	0.357	0.357
30449	ENSMUSG00000028189.12	Ctbs	chr3	+	146454162	146454485	146450477	146450630	146454947	146455156	30449	34,35,45,19	4,0,0,0	47,36,30,20	0,0,7,4	298	149	0.00438264	0.0780088	0.81,1.0,1.0,1.0	1.0,1.0,0.682,0.714	0.104	0.104
30481	ENSMUSG00000031712.10	Il15	chr8	-	82402738	82402873	82379488	82379615	82402968	82403209	30481	0,2,1,3	1,2,0,0	0,2,4,1	1,3,4,0	284	149	0.0226613	0.270745	0.0,0.344,1.0,1.0	0.0,0.259,0.344,1.0	0.185	0.185
30485	ENSMUSG00000040250.14	Ints13	chr6	-	146550086	146550164	146549631	146549985	146550638	146550774	30485	2,4,6,0	18,21,4,16	6,13,2,3	11,14,1,12	227	149	0.0375064	0.393657	0.068,0.111,0.496,0.0	0.264,0.379,0.568,0.141	-0.169	0.169
30540	ENSMUSG00000068250.13	Amn1	chr6	-	149183393	149183538	149170832	149171050	149188605	149188695	30540	3,24,3,14	3,1,6,4	11,16,19,3	0,0,0,0	294	149	1.69895e-09	4.92274e-07	0.336,0.924,0.202,0.639	1.0,1.0,1.0,1.0	-0.475	0.475
30560	ENSMUSG00000045103.19	Dmd	chrX	+	85197503	85197535	85190609	85190702	85202470	85202498	30560	32,5,19,1	30,30,17,18	6,2,2,2	28,19,27,27	181	149	0.0016872	0.0366242	0.468,0.121,0.479,0.044	0.15,0.08,0.057,0.057	0.192	0.192
30625	ENSMUSG00000051184.7	Zfp524	chr7	+	5016945	5017044	5015469	5015560	5017436	5018488	30625	2,3,7,0	20,10,27,7	10,23,4,1	28,34,7,14	248	149	0.0157766	0.208151	0.057,0.153,0.135,0.0	0.177,0.289,0.256,0.041	-0.105	0.105
30649	ENSMUSG00000036885.14	Arhgef26	chr3	+	62459609	62459714	62458372	62458440	62460203	62462221	30649	18,14,36,22	0,4,5,0	60,21,53,47	3,0,0,0	254	149	0.00176433	0.0377582	1.0,0.672,0.809,1.0	0.921,1.0,1.0,1.0	-0.11	0.11
30665	ENSMUSG00000069874.7	Irgm2	chr11	+	58216955	58217001	58215007	58215170	58219463	58222782	30665	8,4,57,21	45,51,50,69	64,48,26,11	47,58,39,33	195	149	0.00925951	0.139558	0.12,0.057,0.466,0.189	0.51,0.387,0.337,0.203	-0.151	0.151
30673	ENSMUSG00000032298.13	Neil1	chr9	-	57143757	57143819	57143450	57143613	57143978	57144006	30673	5,6,4,18	0,0,2,0	9,5,8,15	0,1,6,1	211	149	0.00401752	0.0726025	1.0,1.0,0.585,1.0	1.0,0.779,0.485,0.914	0.102	0.102
30689	ENSMUSG00000031060.16	Rbm10	chrX	+	20637425	20637656	20635730	20635914	20639432	20639502	30689	3,6,2,2	34,29,20,5	10,9,9,3	13,17,25,8	298	149	0.000502454	0.0143016	0.042,0.094,0.048,0.167	0.278,0.209,0.153,0.158	-0.112	0.112
30700	ENSMUSG00000024411.11	Aqp4	chr18	-	15409277	15409407	15399587	15400002	15410891	15410929	30700	4,13,7,7	0,10,0,8	1,2,1,1	0,0,3,0	279	149	0.0161721	0.211914	1.0,0.41,1.0,0.318	1.0,1.0,0.151,1.0	-0.106	0.106
30788	ENSMUSG00000001018.15	Snapin	chr3	-	90490547	90490594	90490153	90490272	90490836	90491024	30788	37,34,34,17	7,1,7,0	32,13,35,16	0,0,0,0	196	149	1.59026e-06	0.000146423	0.801,0.963,0.787,1.0	1.0,1.0,1.0,1.0	-0.112	0.112
30873	ENSMUSG00000050891.10	Tatdn1	chr15	-	58909572	58909649	58905740	58905811	58916151	58916178	30873	15,26,22,42	3,6,0,0	21,10,51,18	0,0,0,0	226	149	0.0013169	0.0303758	0.767,0.741,1.0,1.0	1.0,1.0,1.0,1.0	-0.123	0.123
30874	ENSMUSG00000050891.10	Tatdn1	chr15	-	58909572	58909649	58905740	58905811	58921139	58921182	30874	10,13,9,20	5,16,1,3	3,2,26,7	0,0,0,0	226	149	8.72928e-10	2.8495e-07	0.569,0.349,0.856,0.815	1.0,1.0,1.0,1.0	-0.353	0.353
31013	ENSMUSG00000046574.8	Prr12	chr7	-	45046838	45050128	45045722	45046389	45050204	45050366	31013	21,17,14,27	0,0,0,1	22,21,26,5	0,6,0,1	298	149	0.0135572	0.185964	1.0,1.0,1.0,0.931	1.0,0.636,1.0,0.714	0.145	0.145
31026	ENSMUSG00000038784.13	Cnot4	chr6	-	35024127	35024340	35022070	35023432	35051061	35051559	31026	11,7,10,24	14,8,10,6	5,20,39,18	5,2,1,0	298	149	0.000288791	0.00931955	0.282,0.304,0.333,0.667	0.333,0.833,0.951,1.0	-0.383	0.383
31052	ENSMUSG00000002043.17	Trappc6a	chr7	+	19515024	19515090	19514421	19514539	19515203	19515297	31052	46,63,34,24	4,0,6,5	34,29,47,33	0,1,1,0	215	149	2.64971e-05	0.00140022	0.889,1.0,0.797,0.769	1.0,0.953,0.97,1.0	-0.117	0.117
31200	ENSMUSG00000040940.18	Arhgef1	chr7	+	24919183	24919351	24917894	24918000	24919630	24919776	31200	26,41,44,36	16,15,10,17	14,21,20,23	5,28,25,10	298	149	0.0457818	0.457428	0.448,0.577,0.688,0.514	0.583,0.273,0.286,0.535	0.137	0.137
31278	ENSMUSG00000089832.8	Shkbp1	chr7	-	27347001	27347172	27345172	27345328	27348331	27348448	31278	26,32,17,35	4,3,13,4	23,32,44,46	2,2,4,0	298	149	0.00201086	0.0420227	0.765,0.842,0.395,0.814	0.852,0.889,0.846,1.0	-0.193	0.193
31281	ENSMUSG00000040466.16	Blvrb	chr7	+	27459562	27459633	27459255	27459420	27462566	27462695	31281	473369328523	105,51,28,51	418300405340	0,0,0,0	220	149	0	0	0.753,0.831,0.888,0.874	1.0,1.0,1.0,1.0	-0.163	0.163
31314	ENSMUSG00000041268.17	Dmxl2	chr9	-	54446371	54446494	54445330	54445504	54446858	54447001	31314	8,57,25,37	11,0,0,0	48,31,47,24	0,0,1,0	272	149	0.0213062	0.259784	0.285,1.0,1.0,1.0	1.0,1.0,0.963,1.0	-0.169	0.169
31328	ENSMUSG00000030598.15	Fbxo17	chr7	+	28737338	28737546	28736067	28736203	28737664	28738138	31328	1,1,1,4	2,3,4,1	5,5,1,1	0,0,0,0	298	149	1.09024e-13	8.78596e-11	0.2,0.143,0.111,0.667	1.0,1.0,1.0,1.0	-0.72	0.72
31332	ENSMUSG00000057933.10	Gsta2	chr9	-	78342486	78342597	78341829	78341938	78347088	78347168	31332	32,85,27,26	14,52,0,9	15,7,13,10	0,0,1,0	260	149	3.79904e-08	6.80346e-06	0.567,0.484,1.0,0.623	1.0,1.0,0.882,1.0	-0.302	0.302
31507	ENSMUSG00000040225.15	Prrc2c	chr1	-	162688115	162688217	162684054	162684256	162692372	162692624	31507	32,49,39,46	0,0,2,0	47,26,12,29	6,0,3,2	251	149	0.000102104	0.00412706	1.0,1.0,0.92,1.0	0.823,1.0,0.704,0.896	0.124	0.124
31593	ENSMUSG00000042505.6	Sdhaf3	chr6	+	6957003	6957137	6956006	6956200	7038853	7042979	31593	5,22,6,2	15,15,37,16	2,3,1,0	23,21,22,16	283	149	5.05369e-05	0.00237386	0.149,0.436,0.079,0.062	0.044,0.07,0.023,0.0	0.147	0.147
31610	ENSMUSG00000038535.17	Zfp280d	chr9	+	72329708	72329953	72329027	72329162	72330865	72331173	31610	5,6,3,2	9,14,11,15	0,0,2,0	8,19,14,22	298	149	2.80228e-06	0.000225125	0.217,0.176,0.12,0.063	0.0,0.0,0.067,0.0	0.127	0.127
31613	ENSMUSG00000038535.17	Zfp280d	chr9	+	72339011	72339048	72338745	72338864	72351524	72351570	31613	13,21,12,5	0,2,0,0	19,6,11,9	0,0,4,4	186	149	0.00217985	0.0450432	1.0,0.894,1.0,1.0	1.0,1.0,0.688,0.643	0.141	0.141
31627	ENSMUSG00000066568.12	Lsm14a	chr7	-	34347925	34347982	34344645	34345958	34351285	34351413	31627	94,42,58,19	43,22,14,9	20,82,42,37	11,23,1,0	206	149	0.00486212	0.0847398	0.613,0.58,0.75,0.604	0.568,0.721,0.968,1.0	-0.177	0.177
31685	ENSMUSG00000029267.17	Mtf2	chr5	+	108067459	108067572	108065756	108065965	108069161	108069585	31685	0,3,0,2	3,0,6,9	8,4,3,6	0,6,8,7	262	149	0.014057	0.191293	0.0,1.0,0.0,0.112	1.0,0.275,0.176,0.328	-0.167	0.167
31686	ENSMUSG00000029267.17	Mtf2	chr5	+	108067459	108067572	108065756	108065965	108080824	108081023	31686	0,3,0,2	12,6,9,3	8,1,2,4	7,5,4,7	262	149	0.00343643	0.0644499	0.0,0.221,0.0,0.275	0.394,0.102,0.221,0.245	-0.116	0.116
31695	ENSMUSG00000029267.17	Mtf2	chr5	+	108099653	108099731	108099118	108099186	108100812	108100983	31695	3,3,2,5	4,4,7,20	0,0,0,0	10,6,11,8	227	149	4.33757e-07	5.32653e-05	0.33,0.33,0.158,0.141	0.0,0.0,0.0,0.0	0.24	0.24
31706	ENSMUSG00000079429.9	Mroh2a	chr1	+	88257709	88257865	88256399	88256549	88258582	88258714	31706	7,3,4,6	0,0,0,0	1,1,2,2	0,0,6,0	298	149	0.0440471	0.444227	1.0,1.0,1.0,1.0	1.0,1.0,0.143,1.0	0.214	0.214
31755	ENSMUSG00000022607.18	Ptk2	chr15	-	73392343	73392447	73343284	73343359	73394647	73394744	31755	0,2,2,0	31,27,21,15	3,4,5,1	18,7,8,14	253	149	8.9971e-05	0.00374221	0.0,0.042,0.053,0.0	0.089,0.252,0.269,0.04	-0.139	0.139
31791	ENSMUSG00000056383.10	AI987944	chr7	-	41388107	41388255	41376745	41376872	41393226	41393379	31791	26,25,34,20	2,0,0,0	21,22,25,16	0,0,8,13	297	149	3.24244e-05	0.00164275	0.867,1.0,1.0,1.0	1.0,1.0,0.611,0.382	0.219	0.219
31901	ENSMUSG00000038695.13	Josd2	chr7	+	44468305	44468417	44468075	44468159	44468806	44468969	31901	6,5,14,17	27,19,4,4	10,23,12,17	0,6,11,0	261	149	0.00517154	0.0886642	0.113,0.131,0.666,0.708	1.0,0.686,0.384,1.0	-0.363	0.363
31939	ENSMUSG00000018239.9	Zcchc10	chr11	+	53331647	53331771	53330686	53330731	53332301	53332479	31939	0,4,6,0	17,8,8,20	0,2,0,0	14,14,8,9	273	149	0.00334999	0.0632891	0.0,0.214,0.29,0.0	0.0,0.072,0.0,0.0	0.108	0.108
31956	ENSMUSG00000002963.17	Pnkp	chr7	+	44860076	44860184	44859887	44859945	44860359	44860424	31956	59,72,54,56	0,12,3,7	55,43,93,48	17,8,28,1	257	149	0.0167778	0.218298	1.0,0.777,0.913,0.823	0.652,0.757,0.658,0.965	0.12	0.12
32067	ENSMUSG00000021636.15	Marveld2	chr13	-	100607776	100607812	100600888	100601037	100611432	100612584	32067	23,20,14,10	0,5,5,0	23,21,14,9	0,0,1,0	185	149	0.000193533	0.00679025	1.0,0.763,0.693,1.0	1.0,1.0,0.919,1.0	-0.116	0.116
32094	ENSMUSG00000066442.17	Mthfs	chr9	+	89215208	89215470	89211156	89211311	89239841	89240115	32094	147,144,75,190	0,0,0,0	110146140115	15,0,1,24	298	149	2.10975e-10	7.88497e-08	1.0,1.0,1.0,1.0	0.786,1.0,0.986,0.706	0.13	0.13
32169	ENSMUSG00000022721.19	Trmt2a	chr16	+	18252125	18252248	18250819	18251660	18252401	18252477	32169	59,52,79,43	0,3,11,3	33,64,53,52	0,0,0,0	272	149	6.35391e-07	7.18661e-05	1.0,0.905,0.797,0.887	1.0,1.0,1.0,1.0	-0.103	0.103
32230	ENSMUSG00000030741.15	Spns1	chr7	-	126373921	126373973	126373769	126373836	126375066	126375203	32230	25,20,22,13	4,0,4,1	19,24,14,10	0,0,0,0	201	149	0.000432177	0.0128398	0.822,1.0,0.803,0.906	1.0,1.0,1.0,1.0	-0.117	0.117
32262	ENSMUSG00000032567.16	Aste1	chr9	+	105396797	105397858	105396544	105396705	105401475	105401686	32262	8,7,0,20	0,1,5,0	8,6,10,8	0,0,0,0	298	149	0.0172559	0.222944	1.0,0.778,0.0,1.0	1.0,1.0,1.0,1.0	-0.305	0.305
32263	ENSMUSG00000032567.16	Aste1	chr9	+	105397624	105397858	105396544	105396705	105401475	105402143	32263	8,4,0,20	0,1,5,0	8,3,10,8	0,0,0,0	298	149	0.0150258	0.200874	1.0,0.667,0.0,1.0	1.0,1.0,1.0,1.0	-0.333	0.333
32288	ENSMUSG00000026709.10	Dars2	chr1	-	161065224	161065291	161063246	161063348	161069079	161069179	32288	46,43,29,41	0,0,0,0	14,24,67,48	3,4,1,0	216	149	0.0231465	0.275324	1.0,1.0,1.0,1.0	0.763,0.805,0.979,1.0	0.113	0.113
32289	ENSMUSG00000037922.13	Bank1	chr3	-	136213829	136214026	136103849	136103928	136234613	136234719	32289	19,10,3,1	4,9,0,0	8,7,7,9	0,0,0,0	298	149	4.62695e-06	0.000331444	0.704,0.357,1.0,1.0	1.0,1.0,1.0,1.0	-0.235	0.235
32309	ENSMUSG00000025505.16	Tmem80	chr7	+	141331417	141331561	141328129	141328266	141332909	141332929	32309	38,9,17,44	5,1,8,3	23,29,12,17	0,0,0,0	293	149	1.47463e-08	3.22269e-06	0.794,0.821,0.519,0.882	1.0,1.0,1.0,1.0	-0.246	0.246
32324	ENSMUSG00000051910.13	Sox6	chr7	-	115579015	115579138	115550009	115550159	115580564	115580644	32324	0,0,1,0	10,15,12,12	0,9,0,0	21,5,3,2	272	149	0.0296694	0.329013	0.0,0.0,0.044,0.0	0.0,0.496,0.0,0.0	-0.113	0.113
32341	ENSMUSG00000038822.15	Hace1	chr10	+	45589480	45589570	45588379	45588434	45590267	45590372	32341	5,12,23,11	1,2,0,3	14,14,12,11	0,2,0,0	239	149	0.0326711	0.352963	0.757,0.789,1.0,0.696	1.0,0.814,1.0,1.0	-0.143	0.143
32374	ENSMUSG00000030512.13	Snrpa1	chr7	+	66070118	66070198	66069423	66069526	66070589	66070665	32374	114144103122	6,9,11,27	95,63,103,90	15,14,26,27	229	149	0.000517386	0.0146458	0.925,0.912,0.859,0.746	0.805,0.745,0.72,0.684	0.122	0.122
32426	ENSMUSG00000074071.11	Fam169b	chr7	+	68321819	68321905	68304551	68304651	68350233	68350416	32426	18,10,24,27	11,2,9,9	31,18,17,7	2,2,1,0	235	149	5.0808e-06	0.000355078	0.509,0.76,0.628,0.655	0.908,0.851,0.915,1.0	-0.28	0.28
32428	ENSMUSG00000074071.11	Fam169b	chr7	+	68329221	68329399	68304551	68304651	68350233	68350416	32428	45,38,27,56	11,2,9,9	29,16,22,24	2,2,1,0	298	149	0.00048766	0.013965	0.672,0.905,0.6,0.757	0.879,0.8,0.917,1.0	-0.165	0.165
32448	ENSMUSG00000024566.10	Atp9b	chr18	-	80836354	80836431	80795289	80795432	80844526	80844602	32448	4,18,3,27	0,1,0,0	12,5,14,21	3,0,1,3	226	149	0.0039934	0.0722173	1.0,0.922,1.0,1.0	0.725,1.0,0.902,0.822	0.118	0.118
32489	ENSMUSG00000029924.12	Slc37a3	chr6	-	39367643	39367766	39366888	39367046	39372078	39372137	32489	13,20,10,9	4,7,0,0	7,20,11,8	0,2,0,0	272	149	9.1473e-05	0.0037803	0.64,0.61,1.0,1.0	1.0,0.846,1.0,1.0	-0.149	0.149
32500	ENSMUSG00000027763.13	Mbnl1	chr3	+	60528755	60528978	60501219	60501423	60595593	60598100	32500	75,93,60,24	24,26,32,20	60,68,38,44	3,26,9,0	298	149	0.00151109	0.033797	0.61,0.641,0.484,0.375	0.909,0.567,0.679,1.0	-0.261	0.261
32503	ENSMUSG00000027763.13	Mbnl1	chr3	+	60528755	60529804	60501178	60501423	60595593	60595764	32503	156234134117	24,26,32,20	139,147,97,122	3,26,9,0	298	149	0.00036162	0.0110754	0.765,0.818,0.677,0.745	0.959,0.739,0.843,1.0	-0.134	0.134
32509	ENSMUSG00000027763.13	Mbnl1	chr3	+	60621422	60621458	60615619	60615773	60622145	60622240	32509	23,8,15,7	50,46,58,52	34,11,13,28	52,23,58,36	185	149	0.00858423	0.131768	0.27,0.123,0.172,0.098	0.345,0.278,0.153,0.385	-0.125	0.125
32547	ENSMUSG00000063929.6	Cyp4a32	chr4	+	115602259	115602404	115600974	115601163	115602927	115602972	32547	362234437446	55,42,10,25	773593948868	41,0,0,24	294	149	1.43799e-11	6.99679e-09	0.769,0.738,0.957,0.9	0.905,1.0,1.0,0.948	-0.122	0.122
32557	ENSMUSG00000063929.6	Cyp4a32	chr4	+	115614612	115614677	115611503	115611637	115614819	115614896	32557	309200299327	145,63,108,45	454517501619	19,7,15,13	214	149	0	0	0.597,0.689,0.658,0.835	0.943,0.981,0.959,0.971	-0.269	0.269
32581	ENSMUSG00000030545.9	Pex11a	chr7	-	79740164	79740280	79735956	79737910	79742909	79743080	32581	524250563364	169,74,148,57	307630327163	29,86,27,24	265	149	1.82146e-08	3.81884e-06	0.635,0.655,0.681,0.782	0.856,0.805,0.872,0.792	-0.143	0.143
32604	ENSMUSG00000028292.14	Rars2	chr4	+	34647785	34647881	34646507	34646614	34650190	34650251	32604	36,48,27,55	0,14,14,7	52,42,51,48	0,0,4,0	245	149	2.01231e-07	2.78997e-05	1.0,0.676,0.54,0.827	1.0,1.0,0.886,1.0	-0.211	0.211
32616	ENSMUSG00000030538.15	Cib1	chr7	-	80232343	80232378	80228397	80228548	80232509	80232565	32616	0,3,5,3	10,11,0,11	0,1,2,4	2,0,0,0	184	149	7.68003e-05	0.00330873	0.0,0.181,1.0,0.181	0.0,1.0,1.0,1.0	-0.409	0.409
32626	ENSMUSG00000038943.16	Prc1	chr7	+	80313526	80313568	80313031	80313131	80315113	80315517	32626	3,2,3,2	2,5,10,3	1,3,1,2	0,2,1,0	191	149	0.000358363	0.0110017	0.539,0.238,0.19,0.342	1.0,0.539,0.438,1.0	-0.417	0.417
32645	ENSMUSG00000026977.17	March7	chr2	+	60245211	60245260	60243556	60243670	60247889	60247957	32645	24,50,40,52	4,5,0,7	42,18,35,22	0,0,0,0	198	149	1.87084e-06	0.000166939	0.819,0.883,1.0,0.848	1.0,1.0,1.0,1.0	-0.113	0.113
32748	ENSMUSG00000062797.13	Hikeshi	chr7	-	89935726	89935964	89923563	89923715	89940968	89941066	32748	137,70,46,108	0,13,13,14	57,74,49,97	0,0,0,0	298	149	1.82591e-11	8.52047e-09	1.0,0.729,0.639,0.794	1.0,1.0,1.0,1.0	-0.209	0.209
32764	ENSMUSG00000038506.13	Dcun1d2	chr8	-	13261384	13261467	13255962	13257976	13271589	13271720	32764	7,2,11,7	2,10,7,20	1,2,0,2	6,12,11,4	232	149	0.00049295	0.0140777	0.692,0.114,0.502,0.184	0.097,0.097,0.0,0.243	0.264	0.264
32765	ENSMUSG00000038506.13	Dcun1d2	chr8	-	13261384	13261467	13258946	13259043	13271589	13271720	32765	8,5,16,13	8,12,5,3	7,2,3,2	0,3,0,0	232	149	0.000445992	0.0131293	0.391,0.211,0.673,0.736	1.0,0.3,1.0,1.0	-0.322	0.322
32812	ENSMUSG00000020680.15	Taf15	chr11	+	83488924	83489045	83487222	83487413	83497893	83497926	32812	34,42,34,33	20,9,15,4	53,42,55,49	3,12,9,2	270	149	0.0107966	0.157568	0.484,0.72,0.556,0.82	0.907,0.659,0.771,0.931	-0.172	0.172
32817	ENSMUSG00000057637.13	Prdm2	chr4	-	143142123	143142234	143111633	143111777	143162055	143162182	32817	14,8,12,4	1,8,3,4	7,6,14,6	0,0,0,0	260	149	6.53012e-10	2.187e-07	0.889,0.364,0.696,0.364	1.0,1.0,1.0,1.0	-0.422	0.422
32819	ENSMUSG00000057637.13	Prdm2	chr4	-	143179287	143179391	143170035	143170188	143180876	143180991	32819	2,1,3,1	5,5,0,2	10,17,29,13	0,0,0,1	253	149	2.00793e-09	5.75339e-07	0.191,0.105,1.0,0.227	1.0,1.0,1.0,0.884	-0.59	0.59
32820	ENSMUSG00000057637.13	Prdm2	chr4	-	143179314	143179391	143170035	143170188	143180876	143180991	32820	0,5,2,0	5,5,0,2	4,5,9,6	0,0,0,1	226	149	3.85361e-09	1.03518e-06	0.0,0.397,1.0,0.0	1.0,1.0,1.0,0.798	-0.6	0.6
32825	ENSMUSG00000025504.14	Eps8l2	chr7	+	141342054	141342110	141341892	141341974	141342925	141342990	32825	233186151206	37,29,21,6	158231135108	0,1,0,4	205	149	0	0	0.821,0.823,0.839,0.961	1.0,0.994,1.0,0.952	-0.126	0.126
32842	ENSMUSG00000018909.15	Arrb1	chr7	+	99597035	99597059	99596022	99596106	99598490	99598561	32842	7,17,16,32	3,36,24,49	2,5,5,3	22,41,17,32	173	149	4.11051e-06	0.000301999	0.668,0.289,0.365,0.36	0.073,0.095,0.202,0.075	0.309	0.309
32872	ENSMUSG00000030704.14	Rab6a	chr7	+	100629837	100629943	100629665	100629771	100631741	100631853	32872	108,132,96,148	49,81,34,88	122,80,119,127	34,18,40,19	255	149	5.62134e-05	0.00256572	0.563,0.488,0.623,0.496	0.677,0.722,0.635,0.796	-0.165	0.165
32890	ENSMUSG00000032812.18	Arap1	chr7	+	101384861	101385040	101378368	101378532	101385551	101385593	32890	77,75,43,85	7,10,10,9	91,104,113,55	0,5,2,0	298	149	1.71217e-08	3.61914e-06	0.846,0.789,0.683,0.825	1.0,0.912,0.966,1.0	-0.184	0.184
32891	ENSMUSG00000032812.18	Arap1	chr7	+	101384861	101385040	101378368	101378532	101386148	101386198	32891	35,18,20,25	0,0,0,0	19,25,55,23	1,1,5,1	298	149	0.0024543	0.0496403	1.0,1.0,1.0,1.0	0.905,0.926,0.846,0.92	0.101	0.101
32892	ENSMUSG00000032812.18	Arap1	chr7	+	101385551	101385616	101378189	101378532	101386148	101386198	32892	15,17,13,27	0,0,0,0	10,32,4,11	1,1,5,1	214	149	0.00132348	0.0305004	1.0,1.0,1.0,1.0	0.874,0.957,0.358,0.885	0.232	0.232
32902	ENSMUSG00000042700.16	Sipa1l1	chr12	+	82265956	82266025	82234462	82234528	82311348	82311409	32902	2,1,1,6	10,22,13,27	16,3,2,6	8,33,12,7	218	149	0.0109277	0.158831	0.12,0.03,0.05,0.132	0.578,0.059,0.102,0.369	-0.194	0.194
32903	ENSMUSG00000042700.16	Sipa1l1	chr12	+	82311348	82311409	82234462	82234528	82340661	82342499	32903	18,43,18,42	0,0,10,0	12,44,21,9	0,0,0,0	210	149	0.00726921	0.116073	1.0,1.0,0.561,1.0	1.0,1.0,1.0,1.0	-0.11	0.11
32909	ENSMUSG00000032737.13	Inppl1	chr7	-	101823512	101823646	101822631	101823403	101823892	101824559	32909	76,63,67,68	8,6,12,3	47,82,45,47	1,0,0,0	283	149	9.30835e-10	2.9635e-07	0.833,0.847,0.746,0.923	0.961,1.0,1.0,1.0	-0.153	0.153
33035	ENSMUSG00000021646.9	Mccc2	chr13	-	100009649	100009740	100002291	100002439	100015385	100015618	33035	3,0,1,0	19,11,9,10	2,5,2,4	17,15,17,5	240	149	0.0026535	0.0526372	0.089,0.0,0.065,0.0	0.068,0.171,0.068,0.332	-0.121	0.121
33145	ENSMUSG00000069520.6	Tmem19	chr10	-	115359653	115359767	115347645	115347783	115361906	115361959	33145	85,78,48,96	11,4,12,3	169,87,175,140	7,0,0,0	263	149	2.13941e-08	4.27684e-06	0.814,0.917,0.694,0.948	0.932,1.0,1.0,1.0	-0.14	0.14
33163	ENSMUSG00000031016.9	Wee1	chr7	+	110130828	110130975	110126700	110126822	110134754	110134850	33163	25,41,26,19	2,0,4,5	16,6,6,2	0,0,0,0	296	149	5.02484e-06	0.000353081	0.863,1.0,0.766,0.657	1.0,1.0,1.0,1.0	-0.178	0.178
33213	ENSMUSG00000055320.17	Tead1	chr7	+	112841887	112841950	112839415	112839480	112842039	112842102	33213	2,2,5,1	4,17,18,0	3,0,0,0	3,25,4,1	212	149	0.0270958	0.307411	0.26,0.076,0.163,1.0	0.413,0.0,0.0,0.0	0.272	0.272
33227	ENSMUSG00000024817.13	Uhrf2	chr19	+	30056234	30056494	30039063	30039297	30071242	30071461	33227	51,54,26,88	7,17,4,8	50,52,56,84	6,1,1,8	298	149	0.00420869	0.075423	0.785,0.614,0.765,0.846	0.806,0.963,0.966,0.84	-0.141	0.141
33263	ENSMUSG00000045659.18	Plekha7	chr7	-	116126935	116127046	116123492	116124820	116128553	116128693	33263	7,0,6,1	10,4,7,5	1,2,0,0	5,5,4,3	260	149	0.000566294	0.0157366	0.286,0.0,0.329,0.103	0.103,0.186,0.0,0.0	0.107	0.107
33281	ENSMUSG00000030655.15	Smg1	chr7	-	118217719	118217777	118212888	118213052	118243204	118243670	33281	20,4,31,10	7,10,16,7	3,4,11,4	9,17,8,6	207	149	0.0245855	0.287794	0.673,0.224,0.582,0.507	0.194,0.145,0.497,0.324	0.207	0.207
33321	ENSMUSG00000030876.7	Mettl9	chr7	+	121052086	121052296	121034444	121034975	121076129	121076217	33321	9,5,2,3	0,0,10,0	2,6,8,6	1,0,0,0	298	149	0.0446103	0.448853	1.0,1.0,0.091,1.0	0.5,1.0,1.0,1.0	-0.102	0.102
33369	ENSMUSG00000033114.11	Slc35d2	chr13	-	64120594	64120681	64112929	64113001	64129185	64129325	33369	15,17,8,6	1,0,0,0	9,4,4,4	0,0,9,2	236	149	0.000553565	0.0155169	0.904,1.0,1.0,1.0	1.0,1.0,0.219,0.558	0.282	0.282
33379	ENSMUSG00000030766.15	Arhgap17	chr7	-	123283776	123283825	123279279	123280116	123285419	123285467	33379	3,5,1,2	15,13,1,19	7,3,2,4	5,3,8,0	198	149	0.0120813	0.17034	0.131,0.224,0.429,0.073	0.513,0.429,0.158,1.0	-0.311	0.311
33389	ENSMUSG00000020827.18	Mink1	chr11	+	70606630	70606717	70605949	70606164	70606919	70607079	33389	25,4,1,16	13,27,28,37	2,0,4,0	41,48,23,43	236	149	1.20163e-06	0.000117676	0.548,0.086,0.022,0.214	0.03,0.0,0.099,0.0	0.185	0.185
33390	ENSMUSG00000020827.18	Mink1	chr11	+	70608588	70608699	70608340	70608426	70608839	70608958	33390	69,121,66,101	24,25,41,35	89,78,105,86	12,2,18,22	260	149	0.000580582	0.0159958	0.622,0.735,0.48,0.623	0.81,0.957,0.77,0.691	-0.192	0.192
33500	ENSMUSG00000045251.13	Zfp688	chr7	-	127420009	127420105	127418966	127419641	127421808	127422034	33500	7,0,10,3	5,1,5,2	5,1,3,1	0,0,4,0	245	149	0.00411787	0.0741562	0.46,0.0,0.549,0.477	1.0,1.0,0.313,1.0	-0.457	0.457
33505	ENSMUSG00000030822.15	Prr14	chr7	+	127471704	127471977	127471028	127471119	127472097	127472266	33505	45,34,47,21	1,0,6,3	47,45,57,63	0,0,0,0	298	149	0.000196203	0.00686134	0.957,1.0,0.797,0.778	1.0,1.0,1.0,1.0	-0.117	0.117
33531	ENSMUSG00000053877.12	Srcap	chr7	+	127515203	127515310	127514164	127514240	127515941	127515996	33531	5,0,12,9	12,28,16,17	0,0,7,0	20,37,21,15	256	149	9.94886e-05	0.00404033	0.195,0.0,0.304,0.236	0.0,0.0,0.162,0.0	0.143	0.143
33579	ENSMUSG00000040263.16	Klhdc4	chr8	-	121813706	121813843	121806505	121806598	121820121	121820220	33579	88,48,54,27	8,0,2,4	19,55,35,29	0,0,0,0	286	149	9.39151e-06	0.000590703	0.851,1.0,0.934,0.779	1.0,1.0,1.0,1.0	-0.109	0.109
33586	ENSMUSG00000030846.15	Tial1	chr7	-	128446730	128446798	128446194	128446270	128447038	128447107	33586	4,19,19,4	2,2,5,0	15,12,11,9	0,0,0,0	217	149	6.74003e-05	0.00295599	0.579,0.867,0.723,1.0	1.0,1.0,1.0,1.0	-0.208	0.208
33590	ENSMUSG00000030846.15	Tial1	chr7	-	128447038	128447107	128446730	128446798	128448120	128448208	33590	1,13,18,0	0,6,1,10	3,0,4,2	3,2,8,14	218	149	0.0350411	0.37325	1.0,0.597,0.925,0.0	0.406,0.0,0.255,0.089	0.443	0.443
33602	ENSMUSG00000032198.9	Dock6	chr9	-	21802992	21803118	21802813	21802903	21803921	21804001	33602	16,13,13,24	0,0,0,0	14,14,26,16	0,5,2,0	275	149	0.0101335	0.150185	1.0,1.0,1.0,1.0	1.0,0.603,0.876,1.0	0.13	0.13
33621	ENSMUSG00000030849.18	Fgfr2	chr7	-	130242377	130242644	130241028	130241277	130261748	130261857	33621	21,54,13,33	24,21,34,31	16,46,11,35	15,0,7,9	298	149	0.00986254	0.147015	0.304,0.563,0.16,0.347	0.348,1.0,0.44,0.66	-0.269	0.269
33805	ENSMUSG00000029190.19	D5Ertd579e	chr5	-	36604510	36604608	36600484	36602803	36607937	36608046	33805	64,49,71,114	14,34,18,32	58,57,56,31	4,9,17,5	247	149	0.0186629	0.234999	0.734,0.465,0.704,0.682	0.897,0.793,0.665,0.789	-0.14	0.14
33826	ENSMUSG00000109628.1	BC024386	chr7	+	140906826	140906951	140906517	140906661	140907112	140907351	33826	5,21,5,16	90,75,54,78	42,65,61,51	98,60,145,116	274	149	6.78788e-09	1.68313e-06	0.029,0.132,0.048,0.1	0.189,0.371,0.186,0.193	-0.158	0.158
33831	ENSMUSG00000062232.14	Rapgef2	chr3	-	79082623	79082647	79081061	79081285	79083198	79083322	33831	12,7,0,0	40,26,16,37	15,2,4,7	28,26,9,20	173	149	0.0362497	0.383747	0.205,0.188,0.0,0.0	0.316,0.062,0.277,0.232	-0.123	0.123
33844	ENSMUSG00000038611.17	Phrf1	chr7	+	141260914	141261114	141259189	141260707	141261212	141261542	33844	21,24,14,11	4,5,7,0	9,31,15,12	0,2,0,0	298	149	3.64349e-06	0.000277163	0.724,0.706,0.5,1.0	1.0,0.886,1.0,1.0	-0.239	0.239
33845	ENSMUSG00000038611.17	Phrf1	chr7	+	141260959	141261114	141258031	141260707	141261212	141261542	33845	47,46,45,51	4,5,7,0	13,49,31,38	0,2,0,0	298	149	1.92396e-05	0.00107625	0.855,0.821,0.763,1.0	1.0,0.925,1.0,1.0	-0.121	0.121
34019	ENSMUSG00000002948.19	Map2k7	chr8	+	4240687	4240735	4240104	4240289	4243303	4243445	34019	5,7,14,2	0,8,12,1	12,8,2,4	0,2,0,0	197	149	4.51206e-06	0.00032593	1.0,0.398,0.469,0.602	1.0,0.752,1.0,1.0	-0.321	0.321
34054	ENSMUSG00000022228.14	Zscan26	chr13	-	21448166	21448484	21447785	21447894	21449273	21449333	34054	70,43,57,64	0,9,10,0	53,37,74,39	0,0,0,3	298	149	6.01274e-05	0.00271553	1.0,0.705,0.74,1.0	1.0,1.0,1.0,0.867	-0.105	0.105
34055	ENSMUSG00000022228.14	Zscan26	chr13	-	21448166	21448484	21447785	21447894	21449440	21449516	34055	34,17,31,30	1,3,2,12	26,17,48,11	0,2,3,0	298	149	0.00407534	0.0734415	0.944,0.739,0.886,0.556	1.0,0.81,0.889,1.0	-0.143	0.143
34056	ENSMUSG00000022228.14	Zscan26	chr13	-	21449273	21449333	21447785	21447894	21449440	21449516	34056	22,29,20,17	1,3,2,12	27,20,19,10	0,2,3,0	209	149	0.00749504	0.118651	0.94,0.873,0.877,0.502	1.0,0.877,0.819,1.0	-0.126	0.126
34138	ENSMUSG00000033728.14	Lrrc14	chr15	+	76711421	76711530	76710662	76710927	76712866	76713220	34138	1,2,1,6	25,0,28,1	0,0,0,1	5,43,13,2	258	149	0.00743347	0.118184	0.023,1.0,0.02,0.776	0.0,0.0,0.0,0.224	0.399	0.399
34169	ENSMUSG00000094091.3	Gm21885	chr11	+	94284655	94284831	94283510	94283585	94285838	94286253	34169	13,1,11,10	5,2,0,0	2,9,8,5	0,0,0,0	298	149	0.00947504	0.141812	0.565,0.2,1.0,1.0	1.0,1.0,1.0,1.0	-0.309	0.309
34177	ENSMUSG00000032519.11	Slc25a38	chr9	+	120119882	120120005	120117452	120117537	120120256	120120436	34177	5,19,12,26	28,23,33,48	12,13,35,25	14,17,48,22	272	149	0.0142719	0.193301	0.089,0.312,0.166,0.229	0.32,0.295,0.285,0.384	-0.122	0.122
34199	ENSMUSG00000042213.17	Zfand4	chr6	+	116284739	116284815	116273572	116273872	116287981	116288159	34199	1,9,13,6	0,2,0,6	9,4,9,8	2,0,0,0	225	149	0.00329455	0.0625433	1.0,0.749,1.0,0.398	0.749,1.0,1.0,1.0	-0.15	0.15
34235	ENSMUSG00000034902.17	Pip5k1c	chr10	+	81315878	81315956	81314991	81315118	81317765	81319973	34235	2,1,4,0	45,20,46,28	8,0,0,4	7,23,10,21	227	149	0.0341668	0.365699	0.028,0.032,0.054,0.0	0.429,0.0,0.0,0.111	-0.107	0.107
34239	ENSMUSG00000034902.17	Pip5k1c	chr10	+	81317325	81317403	81315878	81315956	81317765	81318020	34239	3,4,8,5	0,0,0,0	4,4,8,3	8,0,0,0	227	149	0.0350882	0.373444	1.0,1.0,1.0,1.0	0.247,1.0,1.0,1.0	0.188	0.188
34253	ENSMUSG00000026701.15	Prdx6	chr1	-	161249358	161249469	161247256	161247413	161250444	161250554	34253	13,5,15,8	5,7,2,6	15,33,6,12	2,5,0,1	260	149	0.00221305	0.0456392	0.598,0.29,0.811,0.433	0.811,0.791,1.0,0.873	-0.336	0.336
34254	ENSMUSG00000026701.15	Prdx6	chr1	-	161249358	161249469	161247256	161247413	161250756	161251166	34254	12,13,18,8	12,2,13,15	20,34,6,12	0,0,5,0	260	149	8.44501e-06	0.000542439	0.364,0.788,0.442,0.234	1.0,1.0,0.407,1.0	-0.395	0.395
34299	ENSMUSG00000032525.15	Nktr	chr9	+	121729996	121730024	121729397	121729680	121731477	121731565	34299	11,18,1,13	0,0,8,0	15,10,7,3	0,0,0,0	177	149	0.0408462	0.42235	1.0,1.0,0.095,1.0	1.0,1.0,1.0,1.0	-0.226	0.226
34300	ENSMUSG00000032525.15	Nktr	chr9	+	121738387	121738415	121731477	121731565	121741121	121741151	34300	8,11,13,7	26,10,7,14	0,0,7,2	14,9,11,7	177	149	0.00255626	0.0511013	0.206,0.481,0.61,0.296	0.0,0.0,0.349,0.194	0.263	0.263
34375	ENSMUSG00000031583.13	Wrn	chr8	-	33361167	33361268	33353294	33353399	33385341	33385508	34375	3,1,0,5	5,2,10,9	0,0,0,3	15,2,9,9	250	149	0.00308689	0.0594954	0.263,0.23,0.0,0.249	0.0,0.0,0.0,0.166	0.144	0.144
34396	ENSMUSG00000031516.11	Dctn6	chr8	-	34098918	34099101	34097188	34097294	34106341	34106406	34396	4,1,4,3	46,53,43,22	4,14,3,13	20,36,19,17	298	149	4.37515e-06	0.000317821	0.042,0.009,0.044,0.064	0.091,0.163,0.073,0.277	-0.111	0.111
34416	ENSMUSG00000039620.17	Trmt9b	chr8	+	36508324	36508412	36505551	36505725	36511572	36512956	34416	1,3,4,1	10,13,6,9	0,1,0,0	9,5,13,5	237	149	0.000914855	0.022972	0.059,0.127,0.295,0.065	0.0,0.112,0.0,0.0	0.109	0.109
34441	ENSMUSG00000031600.11	Vps37a	chr8	+	40541024	40541093	40540888	40540947	40543809	40543953	34441	39,83,58,75	14,15,9,17	105,60,71,81	0,7,0,0	218	149	3.11717e-12	1.74751e-09	0.656,0.791,0.815,0.751	1.0,0.854,1.0,1.0	-0.21	0.21
34469	ENSMUSG00000031596.15	Slc7a2	chr8	+	40908055	40908195	40905504	40905727	40910994	40911097	34469	22,18,29,6	0,3,0,0	4,2,18,6	3,0,0,5	289	149	0.00163475	0.0358783	1.0,0.756,1.0,1.0	0.407,1.0,1.0,0.382	0.242	0.242
34573	ENSMUSG00000021115.15	Vrk1	chr12	+	106071569	106071641	106070524	106070615	106075006	106075409	34573	3,2,5,1	10,18,6,15	0,0,0,1	10,14,3,21	221	149	7.83502e-05	0.00336189	0.168,0.07,0.36,0.043	0.0,0.0,0.0,0.031	0.152	0.152
34589	ENSMUSG00000036572.16	Upf3b	chrX	-	37099065	37099104	37096857	37097018	37099506	37099689	34589	2,13,3,4	9,8,9,13	17,26,16,12	17,10,19,11	188	149	0.0247015	0.288709	0.15,0.563,0.209,0.196	0.442,0.673,0.4,0.464	-0.215	0.215
34593	ENSMUSG00000038215.15	Cep44	chr8	-	56550062	56550121	56547387	56547524	56550687	56550799	34593	0,0,3,2	3,9,6,5	4,0,8,6	5,1,2,4	208	149	0.00148729	0.0333515	0.0,0.0,0.264,0.223	0.364,0.0,0.741,0.518	-0.284	0.284
34609	ENSMUSG00000074272.10	Ceacam1	chr7	-	25465467	25465520	25464848	25464880	25471797	25472073	34609	29,42,74,11	4,9,24,6	53,43,75,48	5,6,0,2	202	149	1.15721e-05	0.000698878	0.842,0.775,0.695,0.575	0.887,0.841,1.0,0.947	-0.197	0.197
34639	ENSMUSG00000063488.6	Zkscan7	chr9	+	122892684	122892778	122892317	122892391	122894691	122898618	34639	0,0,2,5	8,13,3,6	5,4,9,0	6,4,7,6	243	149	0.0196307	0.244441	0.0,0.0,0.29,0.338	0.338,0.38,0.441,0.0	-0.133	0.133
34676	ENSMUSG00000021824.13	Ap3m1	chr14	-	21044814	21044824	21040952	21041090	21045487	21045763	34676	13,14,17,15	7,3,18,0	9,15,11,12	0,0,0,0	159	149	8.18621e-09	1.97295e-06	0.635,0.814,0.47,1.0	1.0,1.0,1.0,1.0	-0.27	0.27
34678	ENSMUSG00000021824.13	Ap3m1	chr14	-	21045487	21045763	21040952	21041090	21052139	21052187	34678	36,52,55,53	6,0,2,4	30,29,65,43	0,0,0,0	298	149	2.3216e-05	0.0012525	0.75,1.0,0.932,0.869	1.0,1.0,1.0,1.0	-0.112	0.112
34852	ENSMUSG00000006276.10	Eps15l1	chr8	-	72358312	72358445	72345965	72346171	72367903	72367986	34852	20,29,14,26	0,0,0,1	17,16,10,10	1,3,8,7	282	149	2.28366e-09	6.33238e-07	1.0,1.0,1.0,0.932	0.9,0.738,0.398,0.43	0.366	0.366
34872	ENSMUSG00000031791.8	Tmem38a	chr8	+	72579959	72580144	72579562	72579719	72584699	72584817	34872	8,13,6,29	0,0,0,0	12,1,9,9	0,2,3,0	298	149	0.0485239	0.477424	1.0,1.0,1.0,1.0	1.0,0.2,0.6,1.0	0.3	0.3
34873	ENSMUSG00000031791.8	Tmem38a	chr8	+	72581184	72581272	72579562	72579719	72584699	72584817	34873	3,3,5,4	0,0,0,0	2,2,1,11	0,2,3,0	237	149	0.0156671	0.207191	1.0,1.0,1.0,1.0	1.0,0.386,0.173,1.0	0.36	0.36
34925	ENSMUSG00000031684.11	Slc10a7	chr8	+	78698519	78698571	78697165	78697331	78729617	78729763	34925	2,6,1,9	0,3,0,3	2,4,4,9	0,0,0,0	201	149	0.0117098	0.167327	1.0,0.597,1.0,0.69	1.0,1.0,1.0,1.0	-0.178	0.178
35038	ENSMUSG00000057551.10	Zfp317	chr9	+	19641963	19642103	19641065	19641254	19642597	19642724	35038	12,33,9,26	0,5,4,0	42,7,21,26	0,0,0,1	289	149	0.000555169	0.0155169	1.0,0.773,0.537,1.0	1.0,1.0,1.0,0.931	-0.155	0.155
35148	ENSMUSG00000074151.13	Nlrc5	chr8	+	94481975	94482065	94481779	94481863	94482566	94482626	35148	22,23,16,20	4,14,8,5	25,11,25,28	8,3,3,2	239	149	0.048099	0.474877	0.774,0.506,0.555,0.714	0.661,0.696,0.839,0.897	-0.136	0.136
35223	ENSMUSG00000069922.12	Ces3a	chr8	+	105053543	105053684	105053355	105053448	105055578	105055659	35223	1883,202,910,2854	468,54,222,624	7271,4819,9452,7497	896,584,1152,885	290	149	2.22045e-16	2.4896e-13	0.674,0.658,0.678,0.701	0.807,0.809,0.808,0.813	-0.131	0.131
35261	ENSMUSG00000023984.17	Gm20517	chr17	+	47618808	47619062	47612962	47613117	47649949	47651613	35261	29,43,28,39	0,1,5,0	33,30,23,4	1,1,4,6	298	149	0.0193523	0.242026	1.0,0.956,0.737,1.0	0.943,0.938,0.742,0.25	0.205	0.205
35288	ENSMUSG00000031901.12	Dus2	chr8	+	106031697	106031741	106030351	106030443	106033722	106033783	35288	10,9,24,20	2,0,8,4	24,12,27,14	0,0,0,0	193	149	9.13126e-08	1.43584e-05	0.794,1.0,0.698,0.794	1.0,1.0,1.0,1.0	-0.178	0.178
35346	ENSMUSG00000037300.19	Ttc13	chr8	-	124699655	124699721	124690276	124690359	124709902	124709948	35346	7,12,5,15	11,10,4,0	16,14,11,22	0,4,0,0	215	149	1.88524e-05	0.00105918	0.306,0.454,0.464,1.0	1.0,0.708,1.0,1.0	-0.371	0.371
35347	ENSMUSG00000037300.19	Ttc13	chr8	-	124699655	124699721	124695660	124695752	124709902	124709948	35347	6,13,7,18	20,13,27,23	22,20,12,22	32,20,12,12	215	149	0.031923	0.346915	0.172,0.409,0.152,0.352	0.323,0.409,0.409,0.56	-0.154	0.154
35498	ENSMUSG00000025316.16	Banp	chr8	+	121989954	121990071	121978554	121978754	121991527	121991586	35498	8,9,18,34	5,0,2,1	17,10,25,10	8,16,1,7	266	149	0.0116841	0.167208	0.473,1.0,0.834,0.95	0.543,0.259,0.933,0.445	0.269	0.269
35504	ENSMUSG00000034243.17	Golgb1	chr16	+	36886130	36886228	36885010	36885188	36887238	36887403	35504	21,20,11,11	10,30,9,13	36,19,61,36	13,6,0,10	247	149	1.82299e-05	0.00102869	0.559,0.287,0.424,0.338	0.626,0.656,1.0,0.685	-0.34	0.34
35505	ENSMUSG00000034243.17	Golgb1	chr16	+	36886133	36886228	36885010	36885188	36887238	36887403	35505	30,8,14,15	10,30,9,13	34,33,35,34	13,6,0,10	244	149	0.000377441	0.0114511	0.647,0.14,0.487,0.413	0.615,0.771,1.0,0.675	-0.343	0.343
35518	ENSMUSG00000006362.16	Cbfa2t3	chr8	-	122647700	122647778	122643291	122643533	122650329	122650476	35518	12,17,10,27	2,2,2,5	1,18,6,4	0,0,0,0	227	149	5.15959e-06	0.000359609	0.798,0.848,0.766,0.78	1.0,1.0,1.0,1.0	-0.202	0.202
35574	ENSMUSG00000036099.16	Vezt	chr10	-	93994887	93995012	93993516	93993666	93996837	93997113	35574	0,6,0,0	13,8,13,14	17,4,1,1	13,11,9,7	274	149	0.00223845	0.0459961	0.0,0.29,0.0,0.0	0.416,0.165,0.057,0.072	-0.105	0.105
35640	ENSMUSG00000050912.15	Tmem123	chr9	+	7789299	7789385	7785210	7785326	7790841	7791048	35640	0,6,0,0	5,1,3,1	2,0,6,9	1,4,0,0	235	149	0.000228998	0.00772959	0.0,0.792,0.0,0.0	0.559,0.0,1.0,1.0	-0.442	0.442
35649	ENSMUSG00000037808.13	Fam76b	chr9	+	13836658	13836716	13836102	13836183	13836836	13836972	35649	5,2,4,3	7,16,30,15	2,0,0,1	19,15,9,12	207	149	0.000293421	0.00938802	0.34,0.083,0.088,0.126	0.07,0.0,0.0,0.057	0.128	0.128
35696	ENSMUSG00000039167.12	Adgrl4	chr3	+	151492276	151492426	151439097	151439387	151497826	151497976	35696	11,16,9,20	45,1,3,0	3,16,15,16	0,0,0,1	298	149	5.99228e-06	0.000408807	0.109,0.889,0.6,1.0	1.0,1.0,1.0,0.889	-0.323	0.323
35700	ENSMUSG00000036644.15	Tbc1d9b	chr11	+	50131861	50132187	50131401	50131556	50135824	50135935	35700	19,22,5,19	25,33,39,70	14,9,7,3	56,44,57,46	298	149	0.000931056	0.0232656	0.275,0.25,0.06,0.119	0.111,0.093,0.058,0.032	0.102	0.102
35704	ENSMUSG00000036644.15	Tbc1d9b	chr11	+	50164161	50164212	50163824	50163896	50168168	50168225	35704	3,0,0,0	44,40,41,33	13,3,8,12	43,45,42,33	200	149	9.01215e-10	2.90507e-07	0.048,0.0,0.0,0.0	0.184,0.047,0.124,0.213	-0.13	0.13
35735	ENSMUSG00000032178.14	Ilf3	chr9	+	21400451	21400512	21399959	21400013	21403135	21403501	35735	3,3,4,0	9,9,10,2	0,0,0,1	4,7,17,4	210	149	6.53373e-05	0.0028802	0.191,0.191,0.221,0.0	0.0,0.0,0.0,0.151	0.113	0.113
35746	ENSMUSG00000032185.15	Carm1	chr9	+	21574893	21575093	21574486	21574593	21575413	21575518	35746	6,17,15,18	30,35,25,42	6,0,5,4	32,33,29,23	298	149	2.58117e-05	0.00136962	0.091,0.195,0.231,0.176	0.086,0.0,0.079,0.08	0.112	0.112
35771	ENSMUSG00000001348.15	Acp5	chr9	-	22130522	22130608	22129862	22130129	22131736	22131831	35771	126175112108	213186160143	47,64,36,38	163200135120	235	149	3.59379e-13	2.64791e-10	0.273,0.374,0.307,0.324	0.155,0.169,0.145,0.167	0.161	0.161
35827	ENSMUSG00000036833.16	Pnpla7	chr2	+	24978125	24978221	24976100	24976313	24980033	24980102	35827	0,0,5,0	30,28,20,41	0,14,3,2	36,39,0,36	245	149	0.0206092	0.253807	0.0,0.0,0.132,0.0	0.0,0.179,1.0,0.033	-0.27	0.27
35843	ENSMUSG00000020674.17	Pxdn	chr12	+	29979239	29979311	29975490	29975562	29982293	29982365	35843	31,53,26,52	0,1,0,0	25,18,4,12	0,7,1,0	221	149	0.00353673	0.0659473	1.0,0.973,1.0,1.0	1.0,0.634,0.729,1.0	0.152	0.152
35898	ENSMUSG00000052512.17	Nav2	chr7	+	49552839	49552905	49551596	49552049	49554214	49554259	35898	6,5,7,17	5,6,0,13	54,14,11,21	0,0,0,0	215	149	3.203e-11	1.42412e-08	0.454,0.366,1.0,0.475	1.0,1.0,1.0,1.0	-0.426	0.426
35994	ENSMUSG00000020831.18	0610010K14Rik	chr11	-	70235695	70235760	70235205	70235464	70236023	70236211	35994	2,7,11,14	2,0,10,0	11,15,3,21	1,1,1,1	214	149	0.0325831	0.35216	0.41,1.0,0.434,1.0	0.885,0.913,0.676,0.936	-0.142	0.142
36021	ENSMUSG00000029310.13	Nudt9	chr5	+	104055489	104055576	104050577	104050817	104058106	104058182	36021	79,18,68,36	1,8,6,7	15,47,28,20	0,0,0,0	236	149	8.36643e-08	1.34008e-05	0.98,0.587,0.877,0.765	1.0,1.0,1.0,1.0	-0.198	0.198
36053	ENSMUSG00000032092.5	Mpzl2	chr9	+	45042037	45042225	45040091	45040582	45042610	45042794	36053	8,8,18,19	1,0,0,2	11,8,10,22	2,0,3,3	298	149	0.00380058	0.0696089	0.8,1.0,1.0,0.826	0.733,1.0,0.625,0.786	0.12	0.12
36139	ENSMUSG00000039089.15	L3mbtl3	chr10	-	26279937	26280413	26279616	26279679	26282779	26282859	36139	26,21,19,31	0,0,0,1	37,10,32,5	3,0,0,8	298	149	0.00128057	0.0297776	1.0,1.0,1.0,0.939	0.86,1.0,1.0,0.238	0.21	0.21
36141	ENSMUSG00000039089.15	L3mbtl3	chr10	-	26344176	26344251	26342507	26342667	26344611	26344723	36141	22,10,11,34	4,0,3,2	22,14,4,15	4,4,11,3	224	149	0.013041	0.181099	0.785,1.0,0.709,0.919	0.785,0.7,0.195,0.769	0.241	0.241
36151	ENSMUSG00000032059.13	Alg9	chr9	+	50783257	50783328	50778969	50779104	50788152	50788241	36151	48,36,19,33	6,7,6,5	59,53,57,55	5,1,2,2	220	149	0.00012018	0.00469418	0.844,0.777,0.682,0.817	0.889,0.973,0.951,0.949	-0.16	0.16
36219	ENSMUSG00000032311.17	Nrg4	chr9	-	55249095	55249169	55242060	55242207	55280889	55280983	36219	2,9,22,25	7,6,11,3	15,3,12,11	0,2,0,6	223	149	0.0263998	0.301772	0.16,0.501,0.572,0.848	1.0,0.501,1.0,0.551	-0.243	0.243
36227	ENSMUSG00000032311.17	Nrg4	chr9	-	55280889	55280983	55249095	55249169	55282550	55282616	36227	6,8,20,22	1,3,3,11	10,2,11,9	3,3,15,9	243	149	0.0151356	0.202133	0.786,0.621,0.803,0.551	0.671,0.29,0.31,0.38	0.277	0.277
36305	ENSMUSG00000027624.20	Epb41l1	chr2	+	156524880	156525288	156514027	156514210	156526888	156526993	36305	0,4,2,6	7,17,4,6	0,2,0,0	9,5,1,1	298	149	0.000251967	0.00837337	0.0,0.105,0.2,0.333	0.0,0.167,0.0,0.0	0.118	0.118
36418	ENSMUSG00000032366.15	Tpm1	chr9	-	67032465	67032541	67031950	67032026	67032793	67032864	36418	62,119,60,66	56,63,39,53	45,54,32,64	13,44,11,20	225	149	0.0299207	0.331298	0.423,0.556,0.505,0.452	0.696,0.448,0.658,0.679	-0.136	0.136
36448	ENSMUSG00000032217.13	Rnf111	chr9	-	70502939	70503002	70475775	70476668	70503458	70503725	36448	35,31,46,29	4,4,0,0	24,37,29,16	1,6,9,6	212	149	0.00115289	0.0273764	0.86,0.845,1.0,1.0	0.944,0.813,0.694,0.652	0.151	0.151
36476	ENSMUSG00000029089.8	5730480H06Rik	chr5	+	48375542	48375610	48374372	48374538	48377074	48377165	36476	14,16,19,15	0,0,0,0	14,32,11,21	0,0,7,0	217	149	0.0453133	0.454154	1.0,1.0,1.0,1.0	1.0,1.0,0.519,1.0	0.12	0.12
36483	ENSMUSG00000029089.8	5730480H06Rik	chr5	+	48380123	48380231	48379329	48379464	48381786	48381867	36483	16,10,11,29	9,4,11,13	31,10,24,8	3,6,8,0	257	149	0.0288469	0.322036	0.508,0.592,0.367,0.564	0.857,0.491,0.635,1.0	-0.238	0.238
36551	ENSMUSG00000025041.17	Nt5c2	chr19	-	46909489	46909548	46904974	46905092	46924261	46924335	36551	11,14,26,18	146,135,98,203	18,8,11,13	33,56,29,42	208	149	0.000155667	0.00572235	0.051,0.069,0.16,0.06	0.281,0.093,0.214,0.181	-0.107	0.107
36567	ENSMUSG00000036438.14	Calm2	chr17	-	87442695	87442726	87435603	87435934	87446792	87446848	36567	0,351,0,310	6,11,6,2	85247220133	3,2,0,1	180	149	1.08857e-05	0.000666793	0.0,0.964,0.0,0.992	0.959,0.99,1.0,0.991	-0.496	0.496
36575	ENSMUSG00000004980.16	Hnrnpa2b1	chr6	-	51464427	51464547	51464088	51464211	51465178	51465241	36575	353,196,280,75	170,114,231,71	163,413,92,121	62,165,73,39	269	149	0.0316711	0.344706	0.535,0.488,0.402,0.369	0.593,0.581,0.411,0.632	-0.106	0.106
36578	ENSMUSG00000034252.14	Senp6	chr9	+	80087429	80087523	80066902	80067572	80092266	80092412	36578	20,46,37,51	5,0,5,0	17,11,35,36	11,7,13,4	243	149	4.96566e-05	0.00234532	0.71,1.0,0.819,1.0	0.487,0.491,0.623,0.847	0.27	0.27
36579	ENSMUSG00000034252.14	Senp6	chr9	+	80089848	80089906	80066902	80067572	80092266	80092412	36579	18,17,29,18	5,0,5,0	24,8,0,14	11,7,13,4	207	149	7.91485e-05	0.0033905	0.722,1.0,0.807,1.0	0.611,0.451,0.0,0.716	0.438	0.438
36664	ENSMUSG00000032425.15	Zfp949	chr9	+	88552661	88552861	88548099	88548508	88554375	88554539	36664	26,24,14,25	0,0,0,2	30,13,30,21	0,6,1,0	298	149	0.0315477	0.344087	1.0,1.0,1.0,0.862	1.0,0.52,0.938,1.0	0.101	0.101
36712	ENSMUSG00000032411.15	Tfdp2	chr9	+	96232681	96232748	96223093	96223198	96273838	96273942	36712	20,30,19,10	7,19,9,11	2,9,27,14	1,2,2,0	216	149	2.91656e-05	0.00151029	0.663,0.521,0.593,0.385	0.58,0.756,0.903,1.0	-0.269	0.269
36745	ENSMUSG00000028580.15	Pum1	chr4	+	130718153	130718262	130701041	130701110	130741462	130741556	36745	12,24,28,9	0,9,2,1	15,18,15,17	0,0,0,0	258	149	2.05258e-06	0.00017943	1.0,0.606,0.89,0.839	1.0,1.0,1.0,1.0	-0.166	0.166
36750	ENSMUSG00000028580.15	Pum1	chr4	+	130730277	130730548	130701041	130701110	130741462	130741556	36750	25,26,14,43	0,9,2,1	40,27,57,21	0,0,0,0	298	149	5.7875e-06	0.000396937	1.0,0.591,0.778,0.956	1.0,1.0,1.0,1.0	-0.169	0.169
36842	ENSMUSG00000027620.16	Rbm39	chr2	-	156177632	156177906	156177360	156177385	156178879	156178952	36842	55,35,33,49	37,68,62,57	11,14,4,27	31,27,64,57	298	149	0.000210944	0.0072338	0.426,0.205,0.21,0.301	0.151,0.206,0.03,0.191	0.141	0.141
36845	ENSMUSG00000027620.16	Rbm39	chr2	-	156178879	156178952	156177632	156177906	156179176	156179240	36845	90,61,100,63	0,0,3,3	38,39,18,46	0,5,5,8	222	149	1.39749e-05	0.000820919	1.0,1.0,0.957,0.934	1.0,0.84,0.707,0.794	0.138	0.138
36873	ENSMUSG00000020131.14	Pcsk4	chr10	-	80323672	80323776	80323482	80323600	80323853	80323954	36873	2,3,25,9	0,0,3,0	23,10,9,12	2,2,0,8	253	149	0.000918635	0.0229955	1.0,1.0,0.831,1.0	0.871,0.746,1.0,0.469	0.186	0.186
36988	ENSMUSG00000060450.14	Rnf14	chr18	+	38297465	38297575	38296819	38297205	38299753	38299926	36988	17,4,3,4	0,1,0,6	10,13,7,1	1,0,0,0	259	149	0.0111284	0.161238	1.0,0.697,1.0,0.277	0.852,1.0,1.0,1.0	-0.219	0.219
36995	ENSMUSG00000060450.14	Rnf14	chr18	+	38297499	38297575	38296804	38297205	38299753	38299926	36995	17,3,3,2	0,1,0,6	10,8,3,1	1,0,0,0	225	149	0.0153913	0.204488	1.0,0.665,1.0,0.181	0.869,1.0,1.0,1.0	-0.256	0.256
36999	ENSMUSG00000060450.14	Rnf14	chr18	+	38298308	38298395	38296819	38297205	38299753	38299923	36999	5,19,12,15	0,1,0,6	32,17,12,16	1,0,0,0	236	149	0.0114428	0.164888	1.0,0.923,1.0,0.612	0.953,1.0,1.0,1.0	-0.104	0.104
[truncated: 14 more rows]

## Sheet: 240 RI events
ID	GeneID	geneSymbol	chr	strand	riExonStart_0base	riExonEnd	upstreamES	upstreamEE	downstreamES	downstreamEE	ID	IJC_SAMPLE_1	SJC_SAMPLE_1	IJC_SAMPLE_2	SJC_SAMPLE_2	IncFormLen	SkipFormLen	PValue	FDR	IncLevel1	IncLevel2	IncLevelDifference	ABS
[truncated: 240 more rows]

[truncated: 1 more sheets: All 1472 AS genes]
