# Supplementary material for: Spliceosome component Usp39 contributes to hepatic lipid homeostasis through the regulation of lipophagy
Source: Research Square preprint supplement (doi:10.21203/rs.3.rs-2182223/v1), 2023-03-02
Supplement: Supplementary file 5 [file ae96027c6171f04c89ca84c4.xlsx]

## Sheet: 35980 binding peaks
PeakID	PeakChr	PeakStart	PeakEnd	Bin_size	P-value	Location	GeneID	TranscriptID	DistanceToTSS	EnsembleID	Symbol	Name
1	chr1	7053101	7053200	100	0.000376653	Distal Intergenic	319263	ENSMUST00000061280.16	-35720	ENSMUSG00000051285	Pcmtd1	protein-L-isoaspartate (D-aspartate) O-methyltransferase domain containing 1
2	chr1	9235801	9235900	100	3.12803e-12	Intron (ENSMUST00000132064.7/71096, intron 1 of 19)	71096	ENSMUST00000126083.1	62336	ENSMUSG00000025909	Sntg1	syntrophin, gamma 1
3	chr1	9237301	9237400	100	1.98676e-05	Intron (ENSMUST00000132064.7/71096, intron 1 of 19)	71096	ENSMUST00000126083.1	60836	ENSMUSG00000025909	Sntg1	syntrophin, gamma 1
4	chr1	9238201	9238300	100	4.29435e-05	Intron (ENSMUST00000132064.7/71096, intron 1 of 19)	71096	ENSMUST00000126083.1	59936	ENSMUSG00000025909	Sntg1	syntrophin, gamma 1
5	chr1	9238801	9238900	100	0.000376653	Intron (ENSMUST00000132064.7/71096, intron 1 of 19)	71096	ENSMUST00000126083.1	59336	ENSMUSG00000025909	Sntg1	syntrophin, gamma 1
6	chr1	9574501	9574600	100	0.000188117	Exon (ENSMUST00000121942.1/ENSMUST00000121942.1, exon 1 of 1)	76187	ENSMUST00000190654.1	26382	ENSMUSG00000025911	Adhfe1	alcohol dehydrogenase, iron containing, 1
7	chr1	9574901	9575100	200	0.000462303	Exon (ENSMUST00000121942.1/ENSMUST00000121942.1, exon 1 of 1)	76982	ENSMUST00000088666.3	-26099	ENSMUSG00000067879	Vxn	vexin
8	chr1	9575601	9575700	100	1.75465e-06	Exon (ENSMUST00000121942.1/ENSMUST00000121942.1, exon 1 of 1)	76982	ENSMUST00000088666.3	-25499	ENSMUSG00000067879	Vxn	vexin
9	chr1	9724401	9724500	100	0.000736488	3' UTR	73331	ENSMUST00000181821.7	-23148	NA	1700034P13Rik	RIKEN cDNA 1700034P13 gene
10	chr1	9748101	9748200	100	9.07675e-05	5' UTR	73331	ENSMUST00000181358.7	145	NA	1700034P13Rik	RIKEN cDNA 1700034P13 gene
11	chr1	9942701	9942900	200	0.00019826	Promoter	73824	ENSMUST00000182043.7	0	ENSMUSG00000098234	Snhg6	small nucleolar RNA host gene 6
12	chr1	9943801	9943900	100	0.000188117	Intron (ENSMUST00000182580.7/73824, intron 1 of 3)	73824	ENSMUST00000182498.7	203	ENSMUSG00000098234	Snhg6	small nucleolar RNA host gene 6
13	chr1	10037601	10037700	100	0.000736488	3' UTR	26754	ENSMUST00000139578.7	238	ENSMUSG00000025917	Cops5	COP9 signalosome subunit 5
14	chr1	10060901	10061000	100	0.000736488	Exon (ENSMUST00000143606.7/211660, exon 4 of 4)	211660	ENSMUST00000149214.2	3977	ENSMUSG00000056763	Cspp1	centrosome and spindle pole associated protein 1
15	chr1	10062201	10062300	100	0.000376653	Intron (ENSMUST00000071087.11/211660, intron 4 of 29)	211660	ENSMUST00000149214.2	5277	ENSMUSG00000056763	Cspp1	centrosome and spindle pole associated protein 1
16	chr1	10065901	10066000	100	0.000188117	Intron (ENSMUST00000071087.11/211660, intron 6 of 29)	211660	ENSMUST00000188249.6	-8382	ENSMUSG00000056763	Cspp1	centrosome and spindle pole associated protein 1
17	chr1	10066401	10066600	200	0.000188117	Exon (ENSMUST00000071087.11/211660, exon 7 of 30)	211660	ENSMUST00000188249.6	-7782	ENSMUSG00000056763	Cspp1	centrosome and spindle pole associated protein 1
18	chr1	10071201	10071300	100	0.000736488	Exon (ENSMUST00000190318.1/ENSMUST00000190318.1, exon 1 of 1)	211660	ENSMUST00000188249.6	-3082	ENSMUSG00000056763	Cspp1	centrosome and spindle pole associated protein 1
19	chr1	10071601	10071700	100	0.000376653	Exon (ENSMUST00000190318.1/ENSMUST00000190318.1, exon 1 of 1)	211660	ENSMUST00000188249.6	-2682	ENSMUSG00000056763	Cspp1	centrosome and spindle pole associated protein 1
20	chr1	10072801	10072900	100	4.29435e-05	Exon (ENSMUST00000190318.1/ENSMUST00000190318.1, exon 1 of 1)	211660	ENSMUST00000188249.6	-1482	ENSMUSG00000056763	Cspp1	centrosome and spindle pole associated protein 1
21	chr1	10075301	10075400	100	0.000188117	Exon (ENSMUST00000190318.1/ENSMUST00000190318.1, exon 1 of 1)	211660	ENSMUST00000188449.6	388	ENSMUSG00000056763	Cspp1	centrosome and spindle pole associated protein 1
22	chr1	10209401	10209500	100	0.000736488	Exon (ENSMUST00000088615.10/211673, exon 6 of 38)	211673	ENSMUST00000186720.1	4713	ENSMUSG00000067851	Arfgef1	ADP-ribosylation factor guanine nucleotide-exchange factor 1(brefeldin A-inhibited)
23	chr1	10231701	10231800	100	9.07675e-05	Intron (ENSMUST00000088615.10/211673, intron 1 of 37)	211673	ENSMUST00000088615.10	870	ENSMUSG00000067851	Arfgef1	ADP-ribosylation factor guanine nucleotide-exchange factor 1(brefeldin A-inhibited)
24	chr1	13564801	13564900	100	9.07675e-05	3' UTR	72265	ENSMUST00000185447.1	14898	ENSMUSG00000025935	Tram1	translocating chain-associating membrane protein 1
25	chr1	13626101	13626300	200	1.08111e-05	3' UTR	212442	ENSMUST00000156222.1	12111	ENSMUSG00000025937	Lactb2	lactamase, beta 2
26	chr1	13626401	13626500	100	0.000376653	3' UTR	212442	ENSMUST00000156222.1	11911	ENSMUSG00000025937	Lactb2	lactamase, beta 2
27	chr1	13627001	13627100	100	0.000736488	Intron (ENSMUST00000027071.6/212442, intron 6 of 6)	212442	ENSMUST00000156222.1	11311	ENSMUSG00000025937	Lactb2	lactamase, beta 2
28	chr1	13669801	13669900	100	3.99162e-06	Intron (ENSMUST00000088542.3/381246, intron 1 of 3)	381246	ENSMUST00000088542.3	1030	ENSMUSG00000067813	Xkr9	X-linked Kx blood group related 9
29	chr1	13670601	13670800	200	2.34676e-05	Intron (ENSMUST00000088542.3/381246, intron 1 of 3)	381246	ENSMUST00000088542.3	1830	ENSMUSG00000067813	Xkr9	X-linked Kx blood group related 9
30	chr1	13671401	13671600	200	4.62611e-05	Intron (ENSMUST00000088542.3/381246, intron 1 of 3)	381246	ENSMUST00000088542.3	2630	ENSMUSG00000067813	Xkr9	X-linked Kx blood group related 9
31	chr1	13672101	13672500	400	2.68398e-06	5' UTR	381246	ENSMUST00000088542.3	3330	ENSMUSG00000067813	Xkr9	X-linked Kx blood group related 9
32	chr1	13677701	13677800	100	0.000376653	Intron (ENSMUST00000088542.3/381246, intron 2 of 3)	381246	ENSMUST00000088542.3	8930	ENSMUSG00000067813	Xkr9	X-linked Kx blood group related 9
33	chr1	13699701	13699800	100	0.000188117	Intron (ENSMUST00000088542.3/381246, intron 3 of 3)	381246	ENSMUST00000088542.3	30930	ENSMUSG00000067813	Xkr9	X-linked Kx blood group related 9
34	chr1	13701601	13701700	100	0.000188117	3' UTR	381246	ENSMUST00000088542.3	32830	ENSMUSG00000067813	Xkr9	X-linked Kx blood group related 9
35	chr1	13701801	13702000	200	0.000209798	Downstream (<=300bp)	381246	ENSMUST00000088542.3	33030	ENSMUSG00000067813	Xkr9	X-linked Kx blood group related 9
36	chr1	13705201	13705300	100	9.07675e-05	Distal Intergenic	381246	ENSMUST00000088542.3	36430	ENSMUSG00000067813	Xkr9	X-linked Kx blood group related 9
37	chr1	14839701	14839900	200	0.000556571	Exon (ENSMUST00000121569.1/ENSMUST00000121569.1, exon 1 of 1)	277328	ENSMUST00000235071.1	78935	ENSMUSG00000032769	Trpa1	transient receptor potential cation channel, subfamily A, member 1
38	chr1	14865201	14865300	100	4.29435e-05	Exon (ENSMUST00000121367.1/ENSMUST00000121367.1, exon 1 of 1)	277328	ENSMUST00000235071.1	53535	ENSMUSG00000032769	Trpa1	transient receptor potential cation channel, subfamily A, member 1
39	chr1	16101301	16101400	100	4.78011e-11	3' UTR	19989	ENSMUST00000140597.7	682	ENSMUSG00000043716	Rpl7	ribosomal protein L7
40	chr1	16101701	16101800	100	5.23872e-15	3' UTR	19989	ENSMUST00000140597.7	282	ENSMUSG00000043716	Rpl7	ribosomal protein L7
41	chr1	16102501	16102600	100	5.23872e-15	Exon (ENSMUST00000058437.13/19989, exon 5 of 7)	19989	ENSMUST00000151017.1	248	ENSMUSG00000043716	Rpl7	ribosomal protein L7
42	chr1	16590601	16590700	100	0.000736488	Intron (ENSMUST00000182554.8/66799, intron 3 of 6)	66799	ENSMUST00000182080.1	-5203	ENSMUSG00000025939	Ube2w	ubiquitin-conjugating enzyme E2W (putative)
43	chr1	20252901	20253000	100	0.000736488	Intron (ENSMUST00000088448.11/241035, intron 52 of 66)	75028	ENSMUST00000161509.2	-103452	ENSMUSG00000089914	4930486I03Rik	RIKEN cDNA 4930486I03 gene
44	chr1	20496301	20496400	100	0.000188117	Intron (ENSMUST00000088448.11/241035, intron 35 of 66)	241035	ENSMUST00000132647.1	-86853	ENSMUSG00000043760	Pkhd1	polycystic kidney and hepatic disease 1
45	chr1	20500401	20500500	100	0.000188117	Intron (ENSMUST00000088448.11/241035, intron 35 of 66)	241035	ENSMUST00000132647.1	-90953	ENSMUSG00000043760	Pkhd1	polycystic kidney and hepatic disease 1
46	chr1	20523301	20523400	100	1.98676e-05	Exon (ENSMUST00000088448.11/241035, exon 32 of 67)	241035	ENSMUST00000128051.1	94640	ENSMUSG00000043760	Pkhd1	polycystic kidney and hepatic disease 1
47	chr1	20523901	20524000	100	0.000188117	Exon (ENSMUST00000088448.11/241035, exon 32 of 67)	241035	ENSMUST00000128051.1	94040	ENSMUSG00000043760	Pkhd1	polycystic kidney and hepatic disease 1
48	chr1	20548401	20548500	100	0.000376653	Intron (ENSMUST00000088448.11/241035, intron 25 of 66)	241035	ENSMUST00000128051.1	69540	ENSMUSG00000043760	Pkhd1	polycystic kidney and hepatic disease 1
49	chr1	20559601	20559700	100	0.000188117	Intron (ENSMUST00000088448.11/241035, intron 19 of 66)	241035	ENSMUST00000128051.1	58340	ENSMUSG00000043760	Pkhd1	polycystic kidney and hepatic disease 1
50	chr1	20563001	20563100	100	0.000376653	Intron (ENSMUST00000088448.11/241035, intron 18 of 66)	241035	ENSMUST00000128051.1	54940	ENSMUSG00000043760	Pkhd1	polycystic kidney and hepatic disease 1
51	chr1	20564001	20564200	200	5.36548e-06	Intron (ENSMUST00000088448.11/241035, intron 16 of 66)	241035	ENSMUST00000128051.1	53840	ENSMUSG00000043760	Pkhd1	polycystic kidney and hepatic disease 1
52	chr1	20565601	20565700	100	1.93694e-11	Exon (ENSMUST00000088448.11/241035, exon 16 of 67)	241035	ENSMUST00000128051.1	52340	ENSMUSG00000043760	Pkhd1	polycystic kidney and hepatic disease 1
53	chr1	20587601	20587700	100	9.07675e-05	Intron (ENSMUST00000088448.11/241035, intron 7 of 66)	241035	ENSMUST00000128051.1	30340	ENSMUSG00000043760	Pkhd1	polycystic kidney and hepatic disease 1
54	chr1	20605901	20606000	100	1.98676e-05	Intron (ENSMUST00000088448.11/241035, intron 5 of 66)	241035	ENSMUST00000128051.1	12040	ENSMUSG00000043760	Pkhd1	polycystic kidney and hepatic disease 1
55	chr1	23257101	23257200	100	0.000736488	Distal Intergenic	387225	ENSMUST00000083471.3	-15069	ENSMUSG00000065405	Mir30a	microRNA 30a
56	chr1	23260101	23260200	100	9.07675e-05	Distal Intergenic	387225	ENSMUST00000083471.3	-12069	ENSMUSG00000065405	Mir30a	microRNA 30a
57	chr1	23264301	23264400	100	0.000736488	Distal Intergenic	387225	ENSMUST00000083471.3	-7869	ENSMUSG00000065405	Mir30a	microRNA 30a
58	chr1	23270701	23270800	100	0.000736488	Distal Intergenic	387225	ENSMUST00000083471.3	-1469	ENSMUSG00000065405	Mir30a	microRNA 30a
59	chr1	23270901	23271000	100	0.000736488	Distal Intergenic	387225	ENSMUST00000083471.3	-1269	ENSMUSG00000065405	Mir30a	microRNA 30a
60	chr1	23276601	23276700	100	0.000736488	Distal Intergenic	387225	ENSMUST00000083471.3	4332	ENSMUSG00000065405	Mir30a	microRNA 30a
61	chr1	23282601	23282700	100	0.000736488	Distal Intergenic	723964	ENSMUST00000182303.1	-8837	ENSMUSG00000065567	Mir30c-2	microRNA 30c-2
62	chr1	23285801	23285900	100	0.000736488	Distal Intergenic	723964	ENSMUST00000182303.1	-5637	ENSMUSG00000065567	Mir30c-2	microRNA 30c-2
63	chr1	23289301	23289400	100	0.000736488	Distal Intergenic	723964	ENSMUST00000182303.1	-2137	ENSMUSG00000065567	Mir30c-2	microRNA 30c-2
64	chr1	23314601	23314700	100	0.000188117	Distal Intergenic	723964	ENSMUST00000083633.1	22900	ENSMUSG00000065567	Mir30c-2	microRNA 30c-2
65	chr1	23877401	23877500	100	9.07675e-05	Intron (ENSMUST00000149737.7/98366, intron 3 of 10)	98366	ENSMUST00000148710.7	-7427	ENSMUSG00000026155	Smap1	small ArfGAP 1
66	chr1	24028201	24028300	100	8.97631e-06	3' UTR	68187	ENSMUST00000185807.1	150	ENSMUSG00000026153	Fam135a	family with sequence similarity 135, member A
67	chr1	24030001	24030100	100	1.98676e-05	Exon (ENSMUST00000027337.14/68187, exon 14 of 21)	68187	ENSMUST00000186331.1	-915	ENSMUSG00000026153	Fam135a	family with sequence similarity 135, member A
68	chr1	24049301	24049400	100	0.000736488	Intron (ENSMUST00000188712.6/68187, intron 8 of 20)	68187	ENSMUST00000186331.1	-20215	ENSMUSG00000026153	Fam135a	family with sequence similarity 135, member A
69	chr1	24050501	24050600	100	0.000188117	Intron (ENSMUST00000188712.6/68187, intron 8 of 20)	68187	ENSMUST00000186331.1	-21415	ENSMUSG00000026153	Fam135a	family with sequence similarity 135, member A
70	chr1	24611501	24616000	4500	1.82084e-08	Exon (ENSMUST00000187714.1/ENSMUST00000187714.1, exon 1 of 1)	12823	ENSMUST00000115244.8	-24029	ENSMUSG00000026141	Col19a1	collagen, type XIX, alpha 1
71	chr1	25015201	25015300	100	1.75465e-06	Distal Intergenic	210933	ENSMUST00000154102.1	189423	ENSMUSG00000033569	Adgrb3	adhesion G protein-coupled receptor B3
72	chr1	25015701	25015800	100	4.29435e-05	Distal Intergenic	210933	ENSMUST00000154102.1	188923	ENSMUSG00000033569	Adgrb3	adhesion G protein-coupled receptor B3
73	chr1	25017601	25017800	200	2.14719e-05	Distal Intergenic	210933	ENSMUST00000154102.1	186923	ENSMUSG00000033569	Adgrb3	adhesion G protein-coupled receptor B3
74	chr1	25018501	25018700	200	0.000368246	Distal Intergenic	210933	ENSMUST00000154102.1	186023	ENSMUSG00000033569	Adgrb3	adhesion G protein-coupled receptor B3
75	chr1	30805401	30805600	200	0.000378178	3' UTR	213109	ENSMUST00000190190.1	3505	ENSMUSG00000048874	Phf3	PHD finger protein 3
76	chr1	30824201	30824300	100	0.000376653	3' UTR	213109	ENSMUST00000187316.1	-10666	ENSMUSG00000048874	Phf3	PHD finger protein 3
77	chr1	30831301	30831400	100	0.000736488	Exon (ENSMUST00000186733.6/213109, exon 4 of 16)	213109	ENSMUST00000187316.1	-17766	ENSMUSG00000048874	Phf3	PHD finger protein 3
78	chr1	30852101	30852200	100	0.000736488	Intron (ENSMUST00000186733.6/213109, intron 2 of 15)	213109	ENSMUST00000187600.1	10870	ENSMUSG00000048874	Phf3	PHD finger protein 3
79	chr1	34139401	34139500	100	0.000736488	Intron (ENSMUST00000183034.4/13518, intron 9 of 102)	13518	ENSMUST00000183006.4	18151	ENSMUSG00000026131	Dst	dystonin
80	chr1	34164101	34164200	100	0.000736488	Exon (ENSMUST00000183034.4/13518, exon 20 of 103)	13518	ENSMUST00000185269.6	3771	ENSMUSG00000026131	Dst	dystonin
81	chr1	34167601	34167700	100	4.29435e-05	Exon (ENSMUST00000183034.4/13518, exon 26 of 103)	13518	ENSMUST00000185269.6	7271	ENSMUSG00000026131	Dst	dystonin
82	chr1	34183001	34183100	100	0.000736488	3' UTR	13518	ENSMUST00000185269.6	22671	ENSMUSG00000026131	Dst	dystonin
83	chr1	34187901	34188100	200	1.2576e-06	Exon (ENSMUST00000183034.4/13518, exon 39 of 103)	13518	ENSMUST00000185269.6	27571	ENSMUSG00000026131	Dst	dystonin
84	chr1	34188501	34188900	400	0.000509437	Exon (ENSMUST00000183034.4/13518, exon 39 of 103)	13518	ENSMUST00000185269.6	28171	ENSMUSG00000026131	Dst	dystonin
85	chr1	34189001	34189100	100	0.000188117	Exon (ENSMUST00000183034.4/13518, exon 39 of 103)	13518	ENSMUST00000185269.6	28671	ENSMUSG00000026131	Dst	dystonin
86	chr1	34189301	34189400	100	0.000736488	Exon (ENSMUST00000183034.4/13518, exon 39 of 103)	13518	ENSMUST00000185269.6	28971	ENSMUSG00000026131	Dst	dystonin
87	chr1	34189501	34189700	200	0.000369121	Exon (ENSMUST00000183034.4/13518, exon 39 of 103)	13518	ENSMUST00000185269.6	29171	ENSMUSG00000026131	Dst	dystonin
88	chr1	34189901	34190100	200	0.000413628	Exon (ENSMUST00000183034.4/13518, exon 39 of 103)	13518	ENSMUST00000185269.6	29571	ENSMUSG00000026131	Dst	dystonin
89	chr1	34190801	34190900	100	0.000376653	Exon (ENSMUST00000183034.4/13518, exon 39 of 103)	13518	ENSMUST00000185269.6	30471	ENSMUSG00000026131	Dst	dystonin
90	chr1	34191101	34191300	200	0.000192815	Exon (ENSMUST00000183034.4/13518, exon 39 of 103)	13518	ENSMUST00000185269.6	30771	ENSMUSG00000026131	Dst	dystonin
91	chr1	34191401	34191500	100	0.000188117	Exon (ENSMUST00000183034.4/13518, exon 39 of 103)	13518	ENSMUST00000185269.6	31071	ENSMUSG00000026131	Dst	dystonin
92	chr1	34191601	34191700	100	0.000376653	Exon (ENSMUST00000183034.4/13518, exon 39 of 103)	13518	ENSMUST00000185269.6	31271	ENSMUSG00000026131	Dst	dystonin
93	chr1	34191801	34191900	100	0.000376653	Exon (ENSMUST00000183034.4/13518, exon 39 of 103)	13518	ENSMUST00000185269.6	31471	ENSMUSG00000026131	Dst	dystonin
94	chr1	34192101	34192200	100	1.75465e-06	Exon (ENSMUST00000183034.4/13518, exon 39 of 103)	13518	ENSMUST00000185269.6	31771	ENSMUSG00000026131	Dst	dystonin
95	chr1	34192701	34192800	100	0.000736488	Exon (ENSMUST00000183034.4/13518, exon 39 of 103)	13518	ENSMUST00000185269.6	32371	ENSMUSG00000026131	Dst	dystonin
96	chr1	34193001	34193200	200	4.98719e-05	Exon (ENSMUST00000183034.4/13518, exon 39 of 103)	13518	ENSMUST00000185269.6	32671	ENSMUSG00000026131	Dst	dystonin
97	chr1	34196101	34196200	100	4.29435e-05	Intron (ENSMUST00000183034.4/13518, intron 43 of 102)	13518	ENSMUST00000185269.6	35771	ENSMUSG00000026131	Dst	dystonin
98	chr1	34196401	34196500	100	1.98676e-05	Intron (ENSMUST00000183034.4/13518, intron 43 of 102)	13518	ENSMUST00000185269.6	36071	ENSMUSG00000026131	Dst	dystonin
99	chr1	34199301	34199400	100	9.07675e-05	Exon (ENSMUST00000183034.4/13518, exon 46 of 103)	13518	ENSMUST00000194192.2	-37196	ENSMUSG00000026131	Dst	dystonin
100	chr1	34200901	34201300	400	0.000127781	Exon (ENSMUST00000183034.4/13518, exon 47 of 103)	13518	ENSMUST00000194192.2	-35296	ENSMUSG00000026131	Dst	dystonin
101	chr1	34218301	34218400	100	4.29435e-05	Exon (ENSMUST00000183034.4/13518, exon 56 of 103)	13518	ENSMUST00000194192.2	-18196	ENSMUSG00000026131	Dst	dystonin
102	chr1	34225501	34225700	200	9.42215e-05	Exon (ENSMUST00000183034.4/13518, exon 59 of 103)	13518	ENSMUST00000194192.2	-10896	ENSMUSG00000026131	Dst	dystonin
103	chr1	34227801	34227900	100	7.15818e-10	Exon (ENSMUST00000183034.4/13518, exon 60 of 103)	13518	ENSMUST00000194192.2	-8696	ENSMUSG00000026131	Dst	dystonin
104	chr1	34228001	34228100	100	1.75465e-06	Exon (ENSMUST00000183034.4/13518, exon 60 of 103)	13518	ENSMUST00000194192.2	-8496	ENSMUSG00000026131	Dst	dystonin
105	chr1	34228301	34228500	200	2.34676e-05	Exon (ENSMUST00000183034.4/13518, exon 60 of 103)	13518	ENSMUST00000194192.2	-8096	ENSMUSG00000026131	Dst	dystonin
106	chr1	34228601	34228700	100	0.000188117	Exon (ENSMUST00000183034.4/13518, exon 60 of 103)	13518	ENSMUST00000194192.2	-7896	ENSMUSG00000026131	Dst	dystonin
107	chr1	34228901	34229000	100	1.75465e-06	Exon (ENSMUST00000183034.4/13518, exon 60 of 103)	13518	ENSMUST00000194192.2	-7596	ENSMUSG00000026131	Dst	dystonin
108	chr1	34249801	34250000	200	0.000369121	Exon (ENSMUST00000183034.4/13518, exon 65 of 103)	13518	ENSMUST00000182018.7	-7836	ENSMUSG00000026131	Dst	dystonin
109	chr1	34251701	34251800	100	0.000736488	Exon (ENSMUST00000183034.4/13518, exon 67 of 103)	13518	ENSMUST00000182018.7	-6036	ENSMUSG00000026131	Dst	dystonin
110	chr1	34252801	34252900	100	0.000736488	Exon (ENSMUST00000183034.4/13518, exon 68 of 103)	13518	ENSMUST00000182018.7	-4936	ENSMUSG00000026131	Dst	dystonin
111	chr1	34262001	34262100	100	5.87583e-08	Exon (ENSMUST00000183034.4/13518, exon 73 of 103)	13518	ENSMUST00000182018.7	4165	ENSMUSG00000026131	Dst	dystonin
112	chr1	34293901	34294000	100	0.000736488	Intron (ENSMUST00000183034.4/13518, intron 93 of 102)	13518	ENSMUST00000183100.7	446	ENSMUSG00000026131	Dst	dystonin
113	chr1	34305301	34305400	100	0.000736488	Intron (ENSMUST00000183034.4/13518, intron 101 of 102)	13518	ENSMUST00000182507.3	10855	ENSMUSG00000026131	Dst	dystonin
114	chr1	34307301	34307400	100	0.000736488	Exon (ENSMUST00000183034.4/13518, exon 103 of 103)	13518	ENSMUST00000182507.3	12855	ENSMUSG00000026131	Dst	dystonin
115	chr1	34307701	34307800	100	9.07675e-05	3' UTR	13518	ENSMUST00000182507.3	13255	ENSMUSG00000026131	Dst	dystonin
116	chr1	34308001	34308100	100	0.000376653	3' UTR	13518	ENSMUST00000182507.3	13555	ENSMUSG00000026131	Dst	dystonin
117	chr1	34813501	34813700	200	0.000209798	3' UTR	226970	ENSMUST00000160855.1	11760	ENSMUSG00000037509	Arhgef4	Rho guanine nucleotide exchange factor (GEF) 4
118	chr1	34814001	34814100	100	4.29435e-05	3' UTR	226970	ENSMUST00000160855.1	12260	ENSMUSG00000037509	Arhgef4	Rho guanine nucleotide exchange factor (GEF) 4
119	chr1	34877701	34877900	200	9.07675e-05	3' UTR	226971	ENSMUST00000152654.2	25864	ENSMUSG00000026123	Plekhb2	pleckstrin homology domain containing, family B (evectins) member 2
120	chr1	36336301	36336400	100	0.000376653	3' UTR	102465541	ENSMUST00000184898.1	12358	ENSMUSG00000098680	Mir6898	microRNA 6898
121	chr1	36367701	36367800	100	4.29435e-05	5' UTR	226976	ENSMUST00000186470.1	214	ENSMUSG00000010453	Kansl3	KAT8 regulatory NSL complex subunit 3
122	chr1	36692201	36692300	100	0.000188117	Exon (ENSMUST00000081180.6/12859, exon 2 of 4)	12859	ENSMUST00000193235.1	557	ENSMUSG00000061518	Cox5b	cytochrome c oxidase subunit 5B
123	chr1	36699401	36699500	100	0.000376653	3' UTR	226977	ENSMUST00000159675.1	2151	ENSMUSG00000037351	Actr1b	ARP1 actin-related protein 1B, centractin beta
124	chr1	36807901	36808000	100	0.000376653	Exon (ENSMUST00000027290.11/56030, exon 31 of 41)	56030	ENSMUST00000187917.1	2536	ENSMUSG00000026116	Tmem131	transmembrane protein 131
125	chr1	36808101	36808200	100	4.29435e-05	Exon (ENSMUST00000027290.11/56030, exon 31 of 41)	56030	ENSMUST00000187917.1	2336	ENSMUSG00000026116	Tmem131	transmembrane protein 131
126	chr1	37357801	37357900	100	0.000736488	5' UTR	269180	ENSMUST00000137266.7	-19	ENSMUSG00000026113	Inpp4a	inositol polyphosphate-4-phosphatase, type I
127	chr1	37386301	37386400	100	0.000736488	Intron (ENSMUST00000027287.10/269180, intron 18 of 25)	269180	ENSMUST00000123124.1	8629	ENSMUSG00000026113	Inpp4a	inositol polyphosphate-4-phosphatase, type I
128	chr1	37399801	37399900	100	0.000736488	Intron (ENSMUST00000027287.10/269180, intron 25 of 25)	269180	ENSMUST00000123124.1	22129	ENSMUSG00000026113	Inpp4a	inositol polyphosphate-4-phosphatase, type I
129	chr1	37407301	37407400	100	0.000736488	Intron (ENSMUST00000027287.10/269180, intron 25 of 25)	76178	ENSMUST00000027286.6	22703	ENSMUSG00000026112	Coa5	cytochrome C oxidase assembly factor 5
130	chr1	38076201	38076300	100	0.000736488	Exon (ENSMUST00000195028.1/ENSMUST00000195028.1, exon 2 of 2)	56210	ENSMUST00000192697.1	5061	ENSMUSG00000026082	Rev1	REV1, DNA directed polymerase
131	chr1	39906301	39906400	100	0.000188117	Intron (ENSMUST00000163854.8/26921, intron 2 of 30)	26921	ENSMUST00000192509.5	5071	ENSMUSG00000026074	Map4k4	mitogen-activated protein kinase kinase kinase kinase 4
132	chr1	39939301	39939400	100	0.000376653	Intron (ENSMUST00000163854.8/26921, intron 2 of 30)	26921	ENSMUST00000193514.6	-24755	ENSMUSG00000026074	Map4k4	mitogen-activated protein kinase kinase kinase kinase 4
133	chr1	40002401	40002500	100	0.000376653	Intron (ENSMUST00000163854.8/26921, intron 16 of 30)	26921	ENSMUST00000191865.1	1724	ENSMUSG00000026074	Map4k4	mitogen-activated protein kinase kinase kinase kinase 4
134	chr1	40010701	40010800	100	0.000736488	Intron (ENSMUST00000163854.8/26921, intron 22 of 30)	26921	ENSMUST00000192884.1	-3052	ENSMUSG00000026074	Map4k4	mitogen-activated protein kinase kinase kinase kinase 4
135	chr1	40011301	40011400	100	0.000376653	Intron (ENSMUST00000163854.8/26921, intron 22 of 30)	26921	ENSMUST00000192884.1	-2452	ENSMUSG00000026074	Map4k4	mitogen-activated protein kinase kinase kinase kinase 4
136	chr1	40012401	40012600	200	1.19296e-05	Intron (ENSMUST00000163854.8/26921, intron 22 of 30)	26921	ENSMUST00000192884.1	-1252	ENSMUSG00000026074	Map4k4	mitogen-activated protein kinase kinase kinase kinase 4
137	chr1	43189101	43189500	400	7.38004e-11	Exon (ENSMUST00000178557.1/ENSMUST00000178557.1, exon 1 of 1)	14200	ENSMUST00000187357.1	7261	ENSMUSG00000008136	Fhl2	four and a half LIM domains 2
138	chr1	43934001	43934100	100	0.000736488	Promoter	22019	ENSMUST00000087933.9	0	ENSMUSG00000041763	Tpp2	tripeptidyl peptidase II
139	chr1	43958101	43958200	100	4.29435e-05	Intron (ENSMUST00000087933.9/22019, intron 8 of 29)	22019	ENSMUST00000186441.1	-13170	ENSMUSG00000041763	Tpp2	tripeptidyl peptidase II
140	chr1	46075901	46076100	200	6.01866e-15	Intron (ENSMUST00000238593.1/227058, intron 2 of 65)	227058	ENSMUST00000238212.1	9048	ENSMUSG00000041144	Dnah7b	dynein, axonemal, heavy chain 7B
141	chr1	51320601	51320700	100	0.000736488	Intron (ENSMUST00000189867.1/442821, intron 2 of 4)	442821	ENSMUST00000189867.1	13079	ENSMUSG00000101799	9330175M20Rik	RIKEN cDNA 9330175M20 gene
142	chr1	52201601	52201700	100	0.000736488	Intron (ENSMUST00000114513.8/14660, intron 7 of 17)	14660	ENSMUST00000114509.7	-1119	ENSMUSG00000026103	Gls	glutaminase
143	chr1	52458901	52459000	100	0.000736488	3' UTR	17936	ENSMUST00000167732.1	8057	ENSMUSG00000002881	Nab1	Ngfi-A binding protein 1
144	chr1	52490101	52490200	100	3.99162e-06	Exon (ENSMUST00000186764.6/17936, exon 3 of 9)	17936	ENSMUST00000170269.1	536	ENSMUSG00000002881	Nab1	Ngfi-A binding protein 1
145	chr1	53694301	53694400	100	8.97631e-06	Intron (ENSMUST00000094964.6/627872, intron 3 of 65)	627872	ENSMUST00000094964.6	12361	ENSMUSG00000096141	Dnah7a	dynein, axonemal, heavy chain 7A
146	chr1	54646701	54646800	100	9.07675e-05	3' UTR	329154	ENSMUST00000178156.7	10887	ENSMUSG00000052331	Ankrd44	ankyrin repeat domain 44
147	chr1	54714301	54714400	100	0.000736488	Intron (ENSMUST00000190007.6/ENSMUST00000190007.6, intron 1 of 4)	329154	ENSMUST00000179242.1	8676	ENSMUSG00000052331	Ankrd44	ankyrin repeat domain 44
148	chr1	54737501	54737600	100	0.000188117	Exon (ENSMUST00000191996.1/ENSMUST00000191996.1, exon 1 of 1)	329154	ENSMUST00000178685.1	-1857	ENSMUSG00000052331	Ankrd44	ankyrin repeat domain 44
149	chr1	54757101	54757200	100	0.000736488	Intron (ENSMUST00000188243.1/ENSMUST00000188243.1, intron 2 of 2)	329154	ENSMUST00000178226.2	6528	ENSMUSG00000052331	Ankrd44	ankyrin repeat domain 44
150	chr1	54766301	54766400	100	0.000188117	Exon (ENSMUST00000188243.1/ENSMUST00000188243.1, exon 3 of 3)	329154	ENSMUST00000177919.7	23	ENSMUSG00000052331	Ankrd44	ankyrin repeat domain 44
151	chr1	54888901	54889000	100	0.000736488	Intron (ENSMUST00000179030.7/329154, intron 1 of 27)	329154	ENSMUST00000177679.1	-4190	ENSMUSG00000052331	Ankrd44	ankyrin repeat domain 44
152	chr1	54917901	54918000	100	1.98676e-05	Intron (ENSMUST00000179030.7/329154, intron 1 of 27)	329154	ENSMUST00000178935.7	8354	ENSMUSG00000052331	Ankrd44	ankyrin repeat domain 44
153	chr1	54918101	54918200	100	0.000736488	Intron (ENSMUST00000179030.7/329154, intron 1 of 27)	329154	ENSMUST00000178935.7	8154	ENSMUSG00000052331	Ankrd44	ankyrin repeat domain 44
154	chr1	54922801	54922900	100	0.000736488	Intron (ENSMUST00000179030.7/329154, intron 1 of 27)	329154	ENSMUST00000178935.7	3454	ENSMUSG00000052331	Ankrd44	ankyrin repeat domain 44
155	chr1	54990301	54990400	100	0.000736488	Exon (ENSMUST00000027127.13/81898, exon 23 of 25)	81898	ENSMUST00000190175.1	715	ENSMUSG00000025982	Sf3b1	splicing factor 3b, subunit 1
156	chr1	55000701	55000800	100	4.29435e-05	Exon (ENSMUST00000027127.13/81898, exon 14 of 25)	81898	ENSMUST00000190175.1	-9586	ENSMUSG00000025982	Sf3b1	splicing factor 3b, subunit 1
157	chr1	55006101	55006200	100	4.29435e-05	Exon (ENSMUST00000027127.13/81898, exon 8 of 25)	81898	ENSMUST00000188859.6	8993	ENSMUSG00000025982	Sf3b1	splicing factor 3b, subunit 1
158	chr1	55007501	55007600	100	0.000736488	Exon (ENSMUST00000027127.13/81898, exon 7 of 25)	81898	ENSMUST00000188859.6	7593	ENSMUSG00000025982	Sf3b1	splicing factor 3b, subunit 1
159	chr1	55015101	55015400	300	0.000491101	Promoter	81898	ENSMUST00000188859.6	0	ENSMUSG00000025982	Sf3b1	splicing factor 3b, subunit 1
160	chr1	55015701	55015800	100	1.75465e-06	Exon (ENSMUST00000187500.6/81898, exon 4 of 10)	81898	ENSMUST00000188859.6	-508	ENSMUSG00000025982	Sf3b1	splicing factor 3b, subunit 1
161	chr1	55077901	55078000	100	0.000376653	3' UTR	15510	ENSMUST00000027123.14	10024	ENSMUSG00000025980	Hspd1	heat shock protein 1 (chaperonin)
162	chr1	55127701	55127800	100	0.000736488	Exon (ENSMUST00000160730.1/ENSMUST00000160730.1, exon 1 of 1)	19070	ENSMUST00000159311.7	-3431	ENSMUSG00000025979	Mob4	MOB family member 4, phocein
163	chr1	55443801	55443900	100	8.97631e-06	Exon (ENSMUST00000193928.1/ENSMUST00000193928.1, exon 1 of 1)	227120	ENSMUST00000042986.9	37880	ENSMUSG00000038349	Plcl1	phospholipase C-like 1
164	chr1	56782001	56782300	300	0.000245496	Distal Intergenic	71066	ENSMUST00000062085.5	-144566	ENSMUSG00000045336	Hsfy2	heat shock transcription factor, Y-linked 2
165	chr1	57585801	57585900	100	9.07675e-05	Distal Intergenic	68736	ENSMUST00000162686.7	-178700	ENSMUSG00000048495	Tyw5	tRNA-yW synthesizing protein 5
166	chr1	58416501	58416600	100	0.000376653	Exon (ENSMUST00000123580.7/12747, exon 1 of 7)	12747	ENSMUST00000123580.7	165	ENSMUSG00000026034	Clk1	CDC-like kinase 1
167	chr1	58417601	58417700	100	1.98676e-05	Intron (ENSMUST00000156931.7/12747, intron 3 of 10)	12747	ENSMUST00000131051.1	-175	ENSMUSG00000026034	Clk1	CDC-like kinase 1
168	chr1	58420101	58420200	100	7.15818e-10	Exon (ENSMUST00000156931.7/12747, exon 3 of 11)	12747	ENSMUST00000186552.6	198	ENSMUSG00000026034	Clk1	CDC-like kinase 1
169	chr1	58421001	58421200	200	1.19296e-05	Exon (ENSMUST00000156931.7/12747, exon 3 of 11)	12747	ENSMUST00000135380.1	58	ENSMUSG00000026034	Clk1	CDC-like kinase 1
170	chr1	58726401	58726500	100	9.07675e-05	5' UTR	12633	ENSMUST00000123032.1	-4052	ENSMUSG00000026031	Cflar	CASP8 and FADD-like apoptosis regulator
171	chr1	58901501	58901600	100	0.000736488	3' UTR	70827	ENSMUST00000172685.1	5612	ENSMUSG00000026028	Trak2	trafficking protein, kinesin binding 2
172	chr1	58910001	58910100	100	3.26219e-07	Exon (ENSMUST00000027186.11/70827, exon 13 of 16)	70827	ENSMUST00000172685.1	-2789	ENSMUSG00000026028	Trak2	trafficking protein, kinesin binding 2
173	chr1	59178301	59178400	100	8.97631e-06	Intron (ENSMUST00000027178.12/74018, intron 25 of 33)	227157	ENSMUST00000114275.8	-14912	ENSMUSG00000079550	Mpp4	membrane protein, palmitoylated 4 (MAGUK p55 subfamily member 4)
174	chr1	59639601	59639700	100	4.29435e-05	3' UTR	381260	ENSMUST00000190490.1	9278	ENSMUSG00000047361	Gm973	predicted gene 973
175	chr1	59685001	59685100	100	0.000376653	Promoter	55989	ENSMUST00000189289.6	0	ENSMUSG00000026020	Nop58	NOP58 ribonucleoprotein
176	chr1	59764301	59764500	200	0.000462303	5' UTR	12168	ENSMUST00000087435.6	901	ENSMUSG00000067336	Bmpr2	bone morphogenetic protein receptor, type II (serine/threonine kinase)
177	chr1	59833801	59833900	100	0.000736488	Intron (ENSMUST00000087435.6/12168, intron 3 of 12)	12168	ENSMUST00000190659.1	-16765	ENSMUSG00000067336	Bmpr2	bone morphogenetic protein receptor, type II (serine/threonine kinase)
178	chr1	60222101	60222200	100	0.000736488	Exon (ENSMUST00000160834.7/269198, exon 9 of 55)	269198	ENSMUST00000160980.2	-2	ENSMUSG00000073664	Nbeal1	neurobeachin like 1
179	chr1	60238601	60238700	100	0.000376653	Exon (ENSMUST00000160834.7/269198, exon 16 of 55)	269198	ENSMUST00000188450.6	3137	ENSMUSG00000073664	Nbeal1	neurobeachin like 1
180	chr1	60260201	60260300	100	0.000736488	Exon (ENSMUST00000160834.7/269198, exon 27 of 55)	269198	ENSMUST00000035569.11	-6	ENSMUSG00000073664	Nbeal1	neurobeachin like 1
181	chr1	60703901	60704000	100	4.29435e-05	Exon (ENSMUST00000122226.1/ENSMUST00000122226.1, exon 1 of 1)	12487	ENSMUST00000132833.1	-12800	ENSMUSG00000026012	Cd28	CD28 antigen
182	chr1	60704101	60704300	200	0.000556571	Exon (ENSMUST00000122226.1/ENSMUST00000122226.1, exon 1 of 1)	12487	ENSMUST00000132833.1	-12500	ENSMUSG00000026012	Cd28	CD28 antigen
183	chr1	63048401	63048500	100	0.000188117	3' UTR	227195	ENSMUST00000133236.7	43429	ENSMUSG00000040865	Ino80d	INO80 complex subunit D
184	chr1	63051001	63051200	200	0.000462303	3' UTR	227195	ENSMUST00000133236.7	40729	ENSMUSG00000040865	Ino80d	INO80 complex subunit D
185	chr1	63086001	63086100	100	0.000376653	Exon (ENSMUST00000133236.7/227195, exon 2 of 13)	227195	ENSMUST00000133236.7	5829	ENSMUSG00000040865	Ino80d	INO80 complex subunit D
186	chr1	63114701	63114800	100	0.000376653	Promoter	100380944	ENSMUST00000188602.1	0	ENSMUSG00000084799	Ino80dos	INO80 complex subunit D, opposite strand
187	chr1	63118401	63118500	100	0.000736488	Exon (ENSMUST00000185480.1/ENSMUST00000185480.1, exon 1 of 1)	100380944	ENSMUST00000188602.1	3661	ENSMUSG00000084799	Ino80dos	INO80 complex subunit D, opposite strand
188	chr1	63120001	63120100	100	0.000736488	Exon (ENSMUST00000185480.1/ENSMUST00000185480.1, exon 1 of 1)	100380944	ENSMUST00000188602.1	5261	ENSMUSG00000084799	Ino80dos	INO80 complex subunit D, opposite strand
189	chr1	63178801	63178900	100	9.76495e-15	3' UTR	100217464	ENSMUST00000082668.1	-104	ENSMUSG00000064602	Snora41	small nucleolar RNA, H/ACA box 41
190	chr1	63179201	63179300	100	9.07675e-05	3' UTR	100217464	ENSMUST00000082668.1	197	ENSMUSG00000064602	Snora41	small nucleolar RNA, H/ACA box 41
191	chr1	64117001	64117100	100	0.000376653	Intron (ENSMUST00000114086.7/93691, intron 1 of 3)	93691	ENSMUST00000055001.9	4382	ENSMUSG00000025959	Klf7	Kruppel-like factor 7 (ubiquitous)
192	chr1	64533001	64533100	100	0.000188117	5' UTR	12912	ENSMUST00000190348.1	107	ENSMUSG00000025958	Creb1	cAMP responsive element binding protein 1
193	chr1	64598001	64598100	100	0.000736488	3' UTR	67099	ENSMUST00000162806.7	17531	ENSMUSG00000025956	Mettl21a	methyltransferase like 21A
194	chr1	66841101	66841200	100	0.000736488	Intron (ENSMUST00000027153.5/11363, intron 8 of 10)	11363	ENSMUST00000139208.1	17131	ENSMUSG00000026003	Acadl	acyl-Coenzyme A dehydrogenase, long-chain
195	chr1	72226201	72226300	100	0.000376653	Exon (ENSMUST00000178786.1/ENSMUST00000178786.1, exon 1 of 1)	381269	ENSMUST00000048860.8	-13894	ENSMUSG00000039395	Mreg	melanoregulin
196	chr1	72236901	72237000	100	2.4663e-08	Exon (ENSMUST00000101806.2/ENSMUST00000101806.2, exon 1 of 1)	381269	ENSMUST00000048860.8	-24594	ENSMUSG00000039395	Mreg	melanoregulin
197	chr1	72244201	72244300	100	8.97631e-06	Exon (ENSMUST00000177868.1/ENSMUST00000177868.1, exon 1 of 1)	381269	ENSMUST00000048860.8	-31894	ENSMUSG00000039395	Mreg	melanoregulin
198	chr1	73910201	73910300	100	0.000736488	3' UTR	21961	ENSMUST00000191527.6	17917	ENSMUSG00000055322	Tns1	tensin 1
199	chr1	73910401	73910800	400	9.26031e-05	3' UTR	21961	ENSMUST00000191527.6	17417	ENSMUSG00000055322	Tns1	tensin 1
200	chr1	73911001	73911600	600	5.443e-05	3' UTR	21961	ENSMUST00000191527.6	16617	ENSMUSG00000055322	Tns1	tensin 1
201	chr1	73911701	73911800	100	0.000188117	3' UTR	21961	ENSMUST00000191527.6	16417	ENSMUSG00000055322	Tns1	tensin 1
202	chr1	73911901	73912100	200	8.77382e-07	3' UTR	21961	ENSMUST00000191527.6	16117	ENSMUSG00000055322	Tns1	tensin 1
203	chr1	73912301	73912800	500	0.000211815	3' UTR	21961	ENSMUST00000191527.6	15417	ENSMUSG00000055322	Tns1	tensin 1
204	chr1	73913101	73913800	700	7.36031e-05	3' UTR	21961	ENSMUST00000191527.6	14417	ENSMUSG00000055322	Tns1	tensin 1
205	chr1	73913901	73914300	400	0.000186805	3' UTR	21961	ENSMUST00000191527.6	13917	ENSMUSG00000055322	Tns1	tensin 1
206	chr1	73914501	73914600	100	1.75465e-06	3' UTR	21961	ENSMUST00000191527.6	13617	ENSMUSG00000055322	Tns1	tensin 1
207	chr1	73917601	73917700	100	0.000376653	Exon (ENSMUST00000169786.7/21961, exon 32 of 35)	21961	ENSMUST00000191527.6	10517	ENSMUSG00000055322	Tns1	tensin 1
208	chr1	73918101	73918200	100	0.000188117	Intron (ENSMUST00000169786.7/21961, intron 30 of 34)	21961	ENSMUST00000191527.6	10017	ENSMUSG00000055322	Tns1	tensin 1
209	chr1	73918701	73918800	100	0.000736488	Intron (ENSMUST00000169786.7/21961, intron 30 of 34)	21961	ENSMUST00000191527.6	9417	ENSMUSG00000055322	Tns1	tensin 1
210	chr1	73922701	73922800	100	0.000736488	Intron (ENSMUST00000169786.7/21961, intron 26 of 34)	21961	ENSMUST00000191527.6	5417	ENSMUSG00000055322	Tns1	tensin 1
211	chr1	73924301	73924400	100	0.000736488	Intron (ENSMUST00000169786.7/21961, intron 26 of 34)	21961	ENSMUST00000191527.6	3817	ENSMUSG00000055322	Tns1	tensin 1
212	chr1	73924701	73925600	900	5.30426e-05	Exon (ENSMUST00000169786.7/21961, exon 26 of 35)	21961	ENSMUST00000191527.6	2617	ENSMUSG00000055322	Tns1	tensin 1
213	chr1	73926801	73926900	100	0.000736488	Intron (ENSMUST00000169786.7/21961, intron 25 of 34)	21961	ENSMUST00000191527.6	1317	ENSMUSG00000055322	Tns1	tensin 1
214	chr1	73928501	73928600	100	0.000376653	Promoter	21961	ENSMUST00000187691.6	0	ENSMUSG00000055322	Tns1	tensin 1
215	chr1	73928901	73929000	100	0.000376653	Intron (ENSMUST00000169786.7/21961, intron 24 of 34)	21961	ENSMUST00000187691.6	-388	ENSMUSG00000055322	Tns1	tensin 1
216	chr1	73929401	73929500	100	0.000376653	Intron (ENSMUST00000169786.7/21961, intron 24 of 34)	21961	ENSMUST00000187691.6	-888	ENSMUSG00000055322	Tns1	tensin 1
217	chr1	73929701	73929900	200	0.000389716	Intron (ENSMUST00000169786.7/21961, intron 24 of 34)	21961	ENSMUST00000185529.1	605	ENSMUSG00000055322	Tns1	tensin 1
218	chr1	73930201	73930400	200	4.62611e-05	Exon (ENSMUST00000185529.1/21961, exon 1 of 3)	21961	ENSMUST00000185529.1	105	ENSMUSG00000055322	Tns1	tensin 1
219	chr1	73930501	73930600	100	0.000376653	Promoter	21961	ENSMUST00000185529.1	0	ENSMUSG00000055322	Tns1	tensin 1
220	chr1	73930801	73930900	100	0.000188117	Promoter	21961	ENSMUST00000185264.6	0	ENSMUSG00000055322	Tns1	tensin 1
221	chr1	73931401	73931600	200	0.000369121	Intron (ENSMUST00000169786.7/21961, intron 24 of 34)	21961	ENSMUST00000185264.6	-590	ENSMUSG00000055322	Tns1	tensin 1
222	chr1	73932001	73932100	100	0.000188117	Intron (ENSMUST00000169786.7/21961, intron 24 of 34)	21961	ENSMUST00000185264.6	-1190	ENSMUSG00000055322	Tns1	tensin 1
223	chr1	73932901	73933100	200	9.85465e-05	Intron (ENSMUST00000169786.7/21961, intron 24 of 34)	21961	ENSMUST00000185264.6	-2090	ENSMUSG00000055322	Tns1	tensin 1
224	chr1	73933201	73933300	100	0.000376653	Intron (ENSMUST00000169786.7/21961, intron 24 of 34)	21961	ENSMUST00000185264.6	-2390	ENSMUSG00000055322	Tns1	tensin 1
225	chr1	73933401	73933500	100	4.29435e-05	Intron (ENSMUST00000169786.7/21961, intron 24 of 34)	21961	ENSMUST00000185264.6	-2590	ENSMUSG00000055322	Tns1	tensin 1
226	chr1	73934801	73935100	300	0.000157137	Intron (ENSMUST00000169786.7/21961, intron 24 of 34)	21961	ENSMUST00000185264.6	-3990	ENSMUSG00000055322	Tns1	tensin 1
227	chr1	73935501	73935700	200	0.000192815	Intron (ENSMUST00000169786.7/21961, intron 24 of 34)	21961	ENSMUST00000185264.6	-4690	ENSMUSG00000055322	Tns1	tensin 1
228	chr1	73936701	73936800	100	1.98676e-05	Intron (ENSMUST00000169786.7/21961, intron 22 of 34)	21961	ENSMUST00000189228.1	4214	ENSMUSG00000055322	Tns1	tensin 1
229	chr1	73937401	73937500	100	0.000188117	Intron (ENSMUST00000169786.7/21961, intron 21 of 34)	21961	ENSMUST00000189228.1	3514	ENSMUSG00000055322	Tns1	tensin 1
230	chr1	73937901	73938000	100	0.000376653	Intron (ENSMUST00000169786.7/21961, intron 21 of 34)	21961	ENSMUST00000189228.1	3014	ENSMUSG00000055322	Tns1	tensin 1
231	chr1	73938501	73938600	100	0.000736488	Intron (ENSMUST00000169786.7/21961, intron 21 of 34)	21961	ENSMUST00000189228.1	2414	ENSMUSG00000055322	Tns1	tensin 1
232	chr1	73938701	73938800	100	1.98676e-05	Intron (ENSMUST00000169786.7/21961, intron 21 of 34)	21961	ENSMUST00000189228.1	2214	ENSMUSG00000055322	Tns1	tensin 1
233	chr1	73939301	73939600	300	7.48262e-05	Intron (ENSMUST00000169786.7/21961, intron 21 of 34)	21961	ENSMUST00000189228.1	1414	ENSMUSG00000055322	Tns1	tensin 1
234	chr1	73940601	73940700	100	3.99162e-06	Intron (ENSMUST00000169786.7/21961, intron 21 of 34)	21961	ENSMUST00000189228.1	314	ENSMUSG00000055322	Tns1	tensin 1
235	chr1	73941101	73941300	200	1.00031e-05	Intron (ENSMUST00000169786.7/21961, intron 20 of 34)	21961	ENSMUST00000189228.1	-87	ENSMUSG00000055322	Tns1	tensin 1
236	chr1	73941401	73941600	200	0.000192815	Intron (ENSMUST00000169786.7/21961, intron 20 of 34)	21961	ENSMUST00000189228.1	-387	ENSMUSG00000055322	Tns1	tensin 1
237	chr1	73942201	73942300	100	3.99162e-06	Intron (ENSMUST00000169786.7/21961, intron 19 of 34)	21961	ENSMUST00000189228.1	-1187	ENSMUSG00000055322	Tns1	tensin 1
238	chr1	73942501	73942600	100	5.87583e-08	Intron (ENSMUST00000169786.7/21961, intron 19 of 34)	21961	ENSMUST00000189228.1	-1487	ENSMUSG00000055322	Tns1	tensin 1
239	chr1	73942701	73942800	100	0.000736488	Intron (ENSMUST00000169786.7/21961, intron 19 of 34)	21961	ENSMUST00000189228.1	-1687	ENSMUSG00000055322	Tns1	tensin 1
240	chr1	73943301	73943400	100	1.75465e-06	Intron (ENSMUST00000169786.7/21961, intron 19 of 34)	21961	ENSMUST00000189228.1	-2287	ENSMUSG00000055322	Tns1	tensin 1
241	chr1	73943501	73943800	300	0.000496598	Intron (ENSMUST00000169786.7/21961, intron 19 of 34)	21961	ENSMUST00000189228.1	-2487	ENSMUSG00000055322	Tns1	tensin 1
242	chr1	73944001	73944200	200	0.00011553	Intron (ENSMUST00000169786.7/21961, intron 19 of 34)	21961	ENSMUST00000189228.1	-2987	ENSMUSG00000055322	Tns1	tensin 1
243	chr1	73945201	73945300	100	1.18034e-10	Intron (ENSMUST00000169786.7/21961, intron 19 of 34)	21961	ENSMUST00000189228.1	-4187	ENSMUSG00000055322	Tns1	tensin 1
244	chr1	73946001	73946100	100	4.29435e-05	Intron (ENSMUST00000169786.7/21961, intron 19 of 34)	21961	ENSMUST00000189228.1	-4987	ENSMUSG00000055322	Tns1	tensin 1
245	chr1	73946401	73946500	100	0.000188117	Intron (ENSMUST00000169786.7/21961, intron 19 of 34)	21961	ENSMUST00000189228.1	-5387	ENSMUSG00000055322	Tns1	tensin 1
246	chr1	73946701	73946800	100	9.07675e-05	Intron (ENSMUST00000169786.7/21961, intron 19 of 34)	21961	ENSMUST00000189228.1	-5687	ENSMUSG00000055322	Tns1	tensin 1
247	chr1	73947401	73947600	200	1.03141e-05	Intron (ENSMUST00000169786.7/21961, intron 19 of 34)	21961	ENSMUST00000189228.1	-6387	ENSMUSG00000055322	Tns1	tensin 1
248	chr1	73947901	73948000	100	0.000188117	Intron (ENSMUST00000169786.7/21961, intron 19 of 34)	21961	ENSMUST00000189228.1	-6887	ENSMUSG00000055322	Tns1	tensin 1
249	chr1	73948101	73948200	100	1.38616e-07	Intron (ENSMUST00000169786.7/21961, intron 19 of 34)	21961	ENSMUST00000189228.1	-7087	ENSMUSG00000055322	Tns1	tensin 1
250	chr1	73948401	73948500	100	0.000188117	Intron (ENSMUST00000169786.7/21961, intron 19 of 34)	21961	ENSMUST00000189228.1	-7387	ENSMUSG00000055322	Tns1	tensin 1
251	chr1	73948601	73948700	100	9.07675e-05	Intron (ENSMUST00000169786.7/21961, intron 19 of 34)	21961	ENSMUST00000189228.1	-7587	ENSMUSG00000055322	Tns1	tensin 1
252	chr1	73949001	73949100	100	8.97631e-06	Intron (ENSMUST00000169786.7/21961, intron 19 of 34)	21961	ENSMUST00000189228.1	-7987	ENSMUSG00000055322	Tns1	tensin 1
253	chr1	73949301	73949600	300	2.15219e-05	Intron (ENSMUST00000169786.7/21961, intron 19 of 34)	21961	ENSMUST00000189228.1	-8287	ENSMUSG00000055322	Tns1	tensin 1
254	chr1	73949701	73949900	200	9.40635e-05	Intron (ENSMUST00000169786.7/21961, intron 19 of 34)	21961	ENSMUST00000189228.1	-8687	ENSMUSG00000055322	Tns1	tensin 1
255	chr1	73950001	73950100	100	4.29435e-05	Intron (ENSMUST00000169786.7/21961, intron 19 of 34)	21961	ENSMUST00000189228.1	-8987	ENSMUSG00000055322	Tns1	tensin 1
256	chr1	73950201	73950500	300	0.000128589	Intron (ENSMUST00000169786.7/21961, intron 19 of 34)	21961	ENSMUST00000189228.1	-9187	ENSMUSG00000055322	Tns1	tensin 1
257	chr1	73950601	73950700	100	4.29435e-05	Intron (ENSMUST00000169786.7/21961, intron 19 of 34)	21961	ENSMUST00000189228.1	-9587	ENSMUSG00000055322	Tns1	tensin 1
258	chr1	73950901	73951000	100	3.99162e-06	Intron (ENSMUST00000169786.7/21961, intron 19 of 34)	21961	ENSMUST00000189228.1	-9887	ENSMUSG00000055322	Tns1	tensin 1
259	chr1	73951201	73951500	300	7.95449e-06	Intron (ENSMUST00000169786.7/21961, intron 19 of 34)	21961	ENSMUST00000189228.1	-10187	ENSMUSG00000055322	Tns1	tensin 1
260	chr1	73951601	73951700	100	7.60547e-07	Intron (ENSMUST00000169786.7/21961, intron 19 of 34)	21961	ENSMUST00000189228.1	-10587	ENSMUSG00000055322	Tns1	tensin 1
261	chr1	73951901	73952200	300	6.33367e-05	Intron (ENSMUST00000169786.7/21961, intron 19 of 34)	21961	ENSMUST00000191367.1	10843	ENSMUSG00000055322	Tns1	tensin 1
262	chr1	73952401	73953800	1400	5.43523e-05	5' UTR	21961	ENSMUST00000191367.1	9243	ENSMUSG00000055322	Tns1	tensin 1
263	chr1	73957901	73958000	100	0.000736488	Intron (ENSMUST00000169786.7/21961, intron 18 of 34)	21961	ENSMUST00000191367.1	5043	ENSMUSG00000055322	Tns1	tensin 1
264	chr1	73961001	73961100	100	1.98676e-05	Intron (ENSMUST00000169786.7/21961, intron 18 of 34)	21961	ENSMUST00000191367.1	1943	ENSMUSG00000055322	Tns1	tensin 1
265	chr1	73966801	73966900	100	0.000376653	Intron (ENSMUST00000169786.7/21961, intron 18 of 34)	21961	ENSMUST00000191367.1	-3758	ENSMUSG00000055322	Tns1	tensin 1
266	chr1	73970601	73970700	100	0.000188117	Intron (ENSMUST00000169786.7/21961, intron 18 of 34)	21961	ENSMUST00000191367.1	-7558	ENSMUSG00000055322	Tns1	tensin 1
267	chr1	73971501	73971600	100	0.000376653	Intron (ENSMUST00000169786.7/21961, intron 18 of 34)	21961	ENSMUST00000191367.1	-8458	ENSMUSG00000055322	Tns1	tensin 1
268	chr1	73974401	73974600	200	6.68555e-05	Intron (ENSMUST00000169786.7/21961, intron 18 of 34)	21961	ENSMUST00000191367.1	-11358	ENSMUSG00000055322	Tns1	tensin 1
269	chr1	73974801	73974900	100	4.29435e-05	Intron (ENSMUST00000169786.7/21961, intron 18 of 34)	21961	ENSMUST00000191367.1	-11758	ENSMUSG00000055322	Tns1	tensin 1
270	chr1	73975201	73975300	100	4.29435e-05	Intron (ENSMUST00000169786.7/21961, intron 18 of 34)	21961	ENSMUST00000188942.1	11763	ENSMUSG00000055322	Tns1	tensin 1
271	chr1	73975901	73976100	200	0.000462303	Intron (ENSMUST00000169786.7/21961, intron 18 of 34)	21961	ENSMUST00000188942.1	10963	ENSMUSG00000055322	Tns1	tensin 1
272	chr1	73977801	73977900	100	0.000736488	Intron (ENSMUST00000169786.7/21961, intron 18 of 34)	21961	ENSMUST00000188942.1	9163	ENSMUSG00000055322	Tns1	tensin 1
273	chr1	73978701	73978800	100	0.000736488	Intron (ENSMUST00000169786.7/21961, intron 18 of 34)	21961	ENSMUST00000188942.1	8263	ENSMUSG00000055322	Tns1	tensin 1
274	chr1	73979101	73979200	100	0.000736488	Intron (ENSMUST00000169786.7/21961, intron 18 of 34)	21961	ENSMUST00000188942.1	7863	ENSMUSG00000055322	Tns1	tensin 1
275	chr1	73979301	73979400	100	0.000736488	Intron (ENSMUST00000169786.7/21961, intron 18 of 34)	21961	ENSMUST00000188942.1	7663	ENSMUSG00000055322	Tns1	tensin 1
276	chr1	73980301	73980400	100	7.60547e-07	Intron (ENSMUST00000169786.7/21961, intron 18 of 34)	21961	ENSMUST00000188942.1	6663	ENSMUSG00000055322	Tns1	tensin 1
277	chr1	73988501	73988600	100	0.000736488	Intron (ENSMUST00000169786.7/21961, intron 12 of 34)	21961	ENSMUST00000188942.1	-1438	ENSMUSG00000055322	Tns1	tensin 1
278	chr1	73989101	73989200	100	4.29435e-05	Intron (ENSMUST00000169786.7/21961, intron 12 of 34)	21961	ENSMUST00000188942.1	-2038	ENSMUSG00000055322	Tns1	tensin 1
279	chr1	73989801	73990000	200	0.000389716	Exon (ENSMUST00000191264.6/21961, exon 7 of 7)	21961	ENSMUST00000188942.1	-2738	ENSMUSG00000055322	Tns1	tensin 1
280	chr1	73990601	73990800	200	2.00094e-06	Intron (ENSMUST00000169786.7/21961, intron 11 of 34)	21961	ENSMUST00000188942.1	-3538	ENSMUSG00000055322	Tns1	tensin 1
281	chr1	73990901	73991300	400	0.000190122	Intron (ENSMUST00000169786.7/21961, intron 11 of 34)	21961	ENSMUST00000188942.1	-3838	ENSMUSG00000055322	Tns1	tensin 1
282	chr1	73991401	73991500	100	7.60547e-07	Intron (ENSMUST00000169786.7/21961, intron 11 of 34)	21961	ENSMUST00000185702.6	3872	ENSMUSG00000055322	Tns1	tensin 1
283	chr1	73992501	73992600	100	4.29435e-05	Intron (ENSMUST00000169786.7/21961, intron 9 of 34)	21961	ENSMUST00000185702.6	2772	ENSMUSG00000055322	Tns1	tensin 1
284	chr1	73993301	73993400	100	1.98676e-05	Intron (ENSMUST00000169786.7/21961, intron 8 of 34)	21961	ENSMUST00000185702.6	1972	ENSMUSG00000055322	Tns1	tensin 1
285	chr1	73995601	73995700	100	4.29435e-05	Exon (ENSMUST00000188436.1/ENSMUST00000188436.1, exon 1 of 1)	21961	ENSMUST00000185331.6	-229	ENSMUSG00000055322	Tns1	tensin 1
286	chr1	73995901	73996000	100	4.29435e-05	Exon (ENSMUST00000188436.1/ENSMUST00000188436.1, exon 1 of 1)	21961	ENSMUST00000185331.6	-529	ENSMUSG00000055322	Tns1	tensin 1
287	chr1	73996501	73996600	100	0.000736488	Exon (ENSMUST00000188436.1/ENSMUST00000188436.1, exon 1 of 1)	21961	ENSMUST00000185331.6	-1129	ENSMUSG00000055322	Tns1	tensin 1
288	chr1	73997501	73997700	200	0.000413628	Exon (ENSMUST00000188436.1/ENSMUST00000188436.1, exon 1 of 1)	21961	ENSMUST00000191264.6	768	ENSMUSG00000055322	Tns1	tensin 1
289	chr1	73998301	73998400	100	1.98676e-05	Exon (ENSMUST00000191264.6/21961, exon 1 of 7)	21961	ENSMUST00000191264.6	68	ENSMUSG00000055322	Tns1	tensin 1
290	chr1	73998701	73998800	100	1.75465e-06	Intron (ENSMUST00000169786.7/21961, intron 6 of 34)	21961	ENSMUST00000189571.1	-233	ENSMUSG00000055322	Tns1	tensin 1
291	chr1	73999001	73999200	200	0.000192815	Intron (ENSMUST00000169786.7/21961, intron 6 of 34)	21961	ENSMUST00000189571.1	-533	ENSMUSG00000055322	Tns1	tensin 1
292	chr1	73999701	74000100	400	0.000372448	Intron (ENSMUST00000169786.7/21961, intron 6 of 34)	21961	ENSMUST00000189571.1	-1233	ENSMUSG00000055322	Tns1	tensin 1
293	chr1	74000401	74000500	100	9.07675e-05	Intron (ENSMUST00000169786.7/21961, intron 6 of 34)	21961	ENSMUST00000190389.6	1067	ENSMUSG00000055322	Tns1	tensin 1
294	chr1	74000801	74000900	100	1.38616e-07	Intron (ENSMUST00000169786.7/21961, intron 6 of 34)	21961	ENSMUST00000190389.6	667	ENSMUSG00000055322	Tns1	tensin 1
295	chr1	74001201	74001400	200	0.000556571	Intron (ENSMUST00000169786.7/21961, intron 6 of 34)	21961	ENSMUST00000190389.6	167	ENSMUSG00000055322	Tns1	tensin 1
296	chr1	74001501	74001600	100	9.07675e-05	Promoter	21961	ENSMUST00000190389.6	0	ENSMUSG00000055322	Tns1	tensin 1
297	chr1	74001701	74001800	100	0.000376653	Intron (ENSMUST00000169786.7/21961, intron 6 of 34)	21961	ENSMUST00000190389.6	-134	ENSMUSG00000055322	Tns1	tensin 1
298	chr1	74002001	74002100	100	4.29435e-05	Intron (ENSMUST00000169786.7/21961, intron 6 of 34)	21961	ENSMUST00000190389.6	-434	ENSMUSG00000055322	Tns1	tensin 1
299	chr1	74002401	74002500	100	0.000736488	Intron (ENSMUST00000169786.7/21961, intron 5 of 34)	21961	ENSMUST00000190389.6	-834	ENSMUSG00000055322	Tns1	tensin 1
300	chr1	74003701	74003800	100	4.29435e-05	Intron (ENSMUST00000169786.7/21961, intron 4 of 34)	21961	ENSMUST00000190389.6	-2134	ENSMUSG00000055322	Tns1	tensin 1
301	chr1	74004101	74004200	100	9.07675e-05	Intron (ENSMUST00000169786.7/21961, intron 4 of 34)	21961	ENSMUST00000190389.6	-2534	ENSMUSG00000055322	Tns1	tensin 1
302	chr1	74004901	74005000	100	0.000188117	Intron (ENSMUST00000169786.7/21961, intron 4 of 34)	21961	ENSMUST00000190389.6	-3334	ENSMUSG00000055322	Tns1	tensin 1
303	chr1	74006701	74006800	100	0.000736488	Intron (ENSMUST00000169786.7/21961, intron 4 of 34)	21961	ENSMUST00000190389.6	-5134	ENSMUSG00000055322	Tns1	tensin 1
304	chr1	74006901	74007000	100	0.000736488	Intron (ENSMUST00000169786.7/21961, intron 4 of 34)	21961	ENSMUST00000190389.6	-5334	ENSMUSG00000055322	Tns1	tensin 1
305	chr1	74007101	74007300	200	0.000556571	Intron (ENSMUST00000169786.7/21961, intron 4 of 34)	21961	ENSMUST00000190389.6	-5534	ENSMUSG00000055322	Tns1	tensin 1
306	chr1	74007601	74007700	100	0.000736488	Intron (ENSMUST00000169786.7/21961, intron 4 of 34)	21961	ENSMUST00000190389.6	-6034	ENSMUSG00000055322	Tns1	tensin 1
307	chr1	74008201	74008300	100	0.000736488	Intron (ENSMUST00000169786.7/21961, intron 4 of 34)	21961	ENSMUST00000190389.6	-6634	ENSMUSG00000055322	Tns1	tensin 1
308	chr1	74008501	74008600	100	0.000376653	Intron (ENSMUST00000169786.7/21961, intron 4 of 34)	21961	ENSMUST00000190389.6	-6934	ENSMUSG00000055322	Tns1	tensin 1
309	chr1	74012401	74012500	100	0.000376653	Intron (ENSMUST00000169786.7/21961, intron 4 of 34)	21961	ENSMUST00000186381.6	3922	ENSMUSG00000055322	Tns1	tensin 1
310	chr1	74013101	74013200	100	0.000736488	Intron (ENSMUST00000169786.7/21961, intron 4 of 34)	21961	ENSMUST00000186381.6	3222	ENSMUSG00000055322	Tns1	tensin 1
311	chr1	74013601	74013700	100	0.000736488	Intron (ENSMUST00000169786.7/21961, intron 4 of 34)	21961	ENSMUST00000186381.6	2722	ENSMUSG00000055322	Tns1	tensin 1
312	chr1	74025701	74025800	100	0.000376653	Intron (ENSMUST00000169786.7/21961, intron 3 of 34)	21961	ENSMUST00000186381.6	-9279	ENSMUSG00000055322	Tns1	tensin 1
313	chr1	74029501	74029600	100	0.000188117	Intron (ENSMUST00000169786.7/21961, intron 3 of 34)	21961	ENSMUST00000187281.6	7533	ENSMUSG00000055322	Tns1	tensin 1
314	chr1	74030801	74030900	100	0.000736488	Intron (ENSMUST00000169786.7/21961, intron 3 of 34)	21961	ENSMUST00000187281.6	6233	ENSMUSG00000055322	Tns1	tensin 1
315	chr1	74031101	74031200	100	0.000736488	Intron (ENSMUST00000169786.7/21961, intron 3 of 34)	21961	ENSMUST00000187281.6	5933	ENSMUSG00000055322	Tns1	tensin 1
316	chr1	74032901	74033000	100	0.000736488	Intron (ENSMUST00000169786.7/21961, intron 3 of 34)	21961	ENSMUST00000187281.6	4133	ENSMUSG00000055322	Tns1	tensin 1
317	chr1	74033201	74033300	100	0.000376653	Intron (ENSMUST00000169786.7/21961, intron 3 of 34)	21961	ENSMUST00000187281.6	3833	ENSMUSG00000055322	Tns1	tensin 1
318	chr1	74037001	74037100	100	0.000736488	Exon (ENSMUST00000187281.6/21961, exon 1 of 7)	21961	ENSMUST00000187281.6	33	ENSMUSG00000055322	Tns1	tensin 1
319	chr1	74037601	74037700	100	0.000376653	Intron (ENSMUST00000169786.7/21961, intron 3 of 34)	21961	ENSMUST00000190599.1	-444	ENSMUSG00000055322	Tns1	tensin 1
320	chr1	74038001	74038100	100	0.000736488	Intron (ENSMUST00000169786.7/21961, intron 3 of 34)	21961	ENSMUST00000190599.1	-844	ENSMUSG00000055322	Tns1	tensin 1
321	chr1	74039901	74040000	100	0.000736488	Intron (ENSMUST00000169786.7/21961, intron 3 of 34)	21961	ENSMUST00000190599.1	-2744	ENSMUSG00000055322	Tns1	tensin 1
322	chr1	74040501	74040600	100	1.98676e-05	Intron (ENSMUST00000169786.7/21961, intron 3 of 34)	21961	ENSMUST00000190599.1	-3344	ENSMUSG00000055322	Tns1	tensin 1
323	chr1	74041401	74041500	100	0.000736488	Intron (ENSMUST00000169786.7/21961, intron 3 of 34)	21961	ENSMUST00000190599.1	-4244	ENSMUSG00000055322	Tns1	tensin 1
324	chr1	74043201	74043300	100	4.29435e-05	Intron (ENSMUST00000169786.7/21961, intron 3 of 34)	21961	ENSMUST00000190599.1	-6044	ENSMUSG00000055322	Tns1	tensin 1
325	chr1	74043601	74043700	100	0.000736488	Intron (ENSMUST00000169786.7/21961, intron 3 of 34)	21961	ENSMUST00000190599.1	-6444	ENSMUSG00000055322	Tns1	tensin 1
326	chr1	74044501	74044600	100	0.000376653	Intron (ENSMUST00000169786.7/21961, intron 3 of 34)	21961	ENSMUST00000190599.1	-7344	ENSMUSG00000055322	Tns1	tensin 1
327	chr1	74045001	74045200	200	0.000103992	Intron (ENSMUST00000169786.7/21961, intron 3 of 34)	21961	ENSMUST00000190599.1	-7844	ENSMUSG00000055322	Tns1	tensin 1
328	chr1	74045901	74046000	100	0.000188117	Intron (ENSMUST00000169786.7/21961, intron 3 of 34)	21961	ENSMUST00000190599.1	-8744	ENSMUSG00000055322	Tns1	tensin 1
329	chr1	74047701	74047800	100	4.29435e-05	Intron (ENSMUST00000169786.7/21961, intron 3 of 34)	21961	ENSMUST00000190599.1	-10544	ENSMUSG00000055322	Tns1	tensin 1
330	chr1	74049501	74049600	100	8.97631e-06	Intron (ENSMUST00000169786.7/21961, intron 3 of 34)	21961	ENSMUST00000190599.1	-12344	ENSMUSG00000055322	Tns1	tensin 1
331	chr1	74051301	74051400	100	0.000376653	Intron (ENSMUST00000169786.7/21961, intron 3 of 34)	21961	ENSMUST00000190599.1	-14144	ENSMUSG00000055322	Tns1	tensin 1
332	chr1	74053401	74053600	200	0.000189204	Intron (ENSMUST00000169786.7/21961, intron 3 of 34)	21961	ENSMUST00000190599.1	-16244	ENSMUSG00000055322	Tns1	tensin 1
333	chr1	74053901	74054000	100	9.07675e-05	Intron (ENSMUST00000169786.7/21961, intron 3 of 34)	21961	ENSMUST00000190599.1	-16744	ENSMUSG00000055322	Tns1	tensin 1
334	chr1	74054701	74054800	100	4.29435e-05	Intron (ENSMUST00000169786.7/21961, intron 3 of 34)	21961	ENSMUST00000190599.1	-17544	ENSMUSG00000055322	Tns1	tensin 1
335	chr1	74055001	74055100	100	0.000736488	Intron (ENSMUST00000169786.7/21961, intron 3 of 34)	21961	ENSMUST00000190599.1	-17844	ENSMUSG00000055322	Tns1	tensin 1
336	chr1	74055401	74055500	100	1.98676e-05	Intron (ENSMUST00000169786.7/21961, intron 3 of 34)	21961	ENSMUST00000190599.1	-18244	ENSMUSG00000055322	Tns1	tensin 1
337	chr1	74055701	74055800	100	8.97631e-06	Intron (ENSMUST00000169786.7/21961, intron 3 of 34)	21961	ENSMUST00000190599.1	-18544	ENSMUSG00000055322	Tns1	tensin 1
338	chr1	74056101	74056200	100	8.97631e-06	Intron (ENSMUST00000169786.7/21961, intron 3 of 34)	21961	ENSMUST00000190599.1	-18944	ENSMUSG00000055322	Tns1	tensin 1
339	chr1	74056401	74056500	100	0.000376653	Intron (ENSMUST00000169786.7/21961, intron 3 of 34)	21961	ENSMUST00000190599.1	-19244	ENSMUSG00000055322	Tns1	tensin 1
340	chr1	74057401	74057500	100	0.000376653	Intron (ENSMUST00000169786.7/21961, intron 3 of 34)	21961	ENSMUST00000190599.1	-20244	ENSMUSG00000055322	Tns1	tensin 1
341	chr1	74057801	74057900	100	0.000188117	Intron (ENSMUST00000169786.7/21961, intron 3 of 34)	21961	ENSMUST00000190599.1	-20644	ENSMUSG00000055322	Tns1	tensin 1
342	chr1	74058301	74058400	100	0.000188117	Intron (ENSMUST00000169786.7/21961, intron 3 of 34)	21961	ENSMUST00000190599.1	-21144	ENSMUSG00000055322	Tns1	tensin 1
343	chr1	74058501	74058600	100	7.60547e-07	Intron (ENSMUST00000169786.7/21961, intron 3 of 34)	21961	ENSMUST00000190599.1	-21344	ENSMUSG00000055322	Tns1	tensin 1
344	chr1	74059301	74059400	100	0.000736488	Intron (ENSMUST00000169786.7/21961, intron 3 of 34)	21961	ENSMUST00000190599.1	-22144	ENSMUSG00000055322	Tns1	tensin 1
345	chr1	74060101	74060200	100	4.29435e-05	Intron (ENSMUST00000169786.7/21961, intron 3 of 34)	21961	ENSMUST00000190599.1	-22944	ENSMUSG00000055322	Tns1	tensin 1
346	chr1	74061601	74061800	200	0.000188117	Intron (ENSMUST00000169786.7/21961, intron 3 of 34)	21961	ENSMUST00000190599.1	-24444	ENSMUSG00000055322	Tns1	tensin 1
347	chr1	74062001	74062100	100	9.07675e-05	Intron (ENSMUST00000169786.7/21961, intron 3 of 34)	21961	ENSMUST00000190599.1	-24844	ENSMUSG00000055322	Tns1	tensin 1
348	chr1	74062501	74062600	100	1.98676e-05	Intron (ENSMUST00000169786.7/21961, intron 3 of 34)	21961	ENSMUST00000190599.1	-25344	ENSMUSG00000055322	Tns1	tensin 1
349	chr1	74063101	74063200	100	0.000736488	Intron (ENSMUST00000169786.7/21961, intron 3 of 34)	21961	ENSMUST00000190599.1	-25944	ENSMUSG00000055322	Tns1	tensin 1
350	chr1	74063601	74063800	200	0.00023371	Intron (ENSMUST00000169786.7/21961, intron 3 of 34)	21961	ENSMUST00000190599.1	-26444	ENSMUSG00000055322	Tns1	tensin 1
351	chr1	74065201	74065300	100	3.99162e-06	Intron (ENSMUST00000169786.7/21961, intron 3 of 34)	21961	ENSMUST00000187584.6	26051	ENSMUSG00000055322	Tns1	tensin 1
352	chr1	74065601	74065800	200	5.53176e-05	Intron (ENSMUST00000169786.7/21961, intron 3 of 34)	21961	ENSMUST00000187584.6	25551	ENSMUSG00000055322	Tns1	tensin 1
353	chr1	74066101	74066300	200	0.000462303	Intron (ENSMUST00000169786.7/21961, intron 3 of 34)	21961	ENSMUST00000187584.6	25051	ENSMUSG00000055322	Tns1	tensin 1
354	chr1	74068201	74068300	100	3.99162e-06	Intron (ENSMUST00000169786.7/21961, intron 3 of 34)	21961	ENSMUST00000187584.6	23051	ENSMUSG00000055322	Tns1	tensin 1
355	chr1	74236501	74236600	100	0.000188117	Promoter	76709	ENSMUST00000006467.13	0	ENSMUSG00000006304	Arpc2	actin related protein 2/3 complex, subunit 2
356	chr1	74280401	74280500	100	0.000736488	Intron (ENSMUST00000006462.13/227290, intron 10 of 10)	227289	ENSMUST00000077985.3	1851	ENSMUSG00000064272	Gpbar1	G protein-coupled bile acid receptor 1
357	chr1	74395501	74395600	100	0.000736488	3' UTR	387219	ENSMUST00000083534.1	1191	ENSMUSG00000065468	Mir26b	microRNA 26b
358	chr1	74396301	74396400	100	0.000188117	3' UTR	387219	ENSMUST00000083534.1	1991	ENSMUSG00000065468	Mir26b	microRNA 26b
359	chr1	74679701	74679800	100	0.000736488	Exon (ENSMUST00000042125.14/67534, exon 3 of 20)	67534	ENSMUST00000113678.1	803	ENSMUSG00000033257	Ttll4	tubulin tyrosine ligase-like family, member 4
360	chr1	74698001	74698100	100	0.000376653	3' UTR	67534	ENSMUST00000143790.1	2267	ENSMUSG00000033257	Ttll4	tubulin tyrosine ligase-like family, member 4
361	chr1	74699301	74699400	100	0.000376653	3' UTR	67534	ENSMUST00000143790.1	3567	ENSMUSG00000033257	Ttll4	tubulin tyrosine ligase-like family, member 4
362	chr1	74792001	74792100	100	1.75465e-06	5' UTR	22409	ENSMUST00000006718.14	485	ENSMUSG00000026167	Wnt10a	wingless-type MMTV integration site family, member 10A
363	chr1	74793401	74793500	100	0.000188117	Exon (ENSMUST00000006718.14/22409, exon 2 of 4)	22409	ENSMUST00000187238.1	38	ENSMUSG00000026167	Wnt10a	wingless-type MMTV integration site family, member 10A
364	chr1	74800501	74800600	100	1.75465e-06	Exon (ENSMUST00000006718.14/22409, exon 3 of 4)	22409	ENSMUST00000187238.1	7138	ENSMUSG00000026167	Wnt10a	wingless-type MMTV integration site family, member 10A
365	chr1	74803101	74803200	100	0.000188117	3' UTR	22409	ENSMUST00000187238.1	9738	ENSMUSG00000026167	Wnt10a	wingless-type MMTV integration site family, member 10A
366	chr1	74803401	74803600	200	9.40707e-05	3' UTR	22409	ENSMUST00000187238.1	10038	ENSMUSG00000026167	Wnt10a	wingless-type MMTV integration site family, member 10A
367	chr1	74803701	74803900	200	0.000189204	3' UTR	22409	ENSMUST00000187238.1	10338	ENSMUSG00000026167	Wnt10a	wingless-type MMTV integration site family, member 10A
368	chr1	75135801	75135900	100	0.000736488	3' UTR	69171	ENSMUST00000188037.1	1906	ENSMUSG00000033159	Cnppd1	cyclin Pas1/PHO80 domain containing 1
369	chr1	75199101	75199200	100	9.07675e-05	3' UTR	74577	ENSMUST00000143193.1	2048	ENSMUSG00000026200	Glb1l	galactosidase, beta 1-like
370	chr1	75210801	75210900	100	0.000188117	Promoter	20872	ENSMUST00000027401.10	0	ENSMUSG00000026201	Stk16	serine/threonine kinase 16
371	chr1	75247401	75247500	100	0.000736488	3' UTR	56812	ENSMUST00000190445.1	5992	ENSMUSG00000026203	Dnajb2	DnaJ heat shock protein family (Hsp40) member B2
372	chr1	75253201	75253300	100	8.97631e-06	Exon (ENSMUST00000027404.11/19275, exon 14 of 23)	19275	ENSMUST00000187216.1	4697	ENSMUSG00000026204	Ptprn	protein tyrosine phosphatase, receptor type, N
373	chr1	75308701	75308800	100	0.000736488	3' UTR	13437	ENSMUST00000186278.1	4959	ENSMUSG00000026209	Dnpep	aspartyl aminopeptidase
374	chr1	78657901	78658000	100	0.000736488	5' UTR	74205	ENSMUST00000142704.7	18	ENSMUSG00000032883	Acsl3	acyl-CoA synthetase long-chain family member 3
375	chr1	78658601	78658700	100	0.000736488	5' UTR	195434	ENSMUST00000151622.1	161	ENSMUSG00000079470	Utp14b	UTP14B small subunit processome component
376	chr1	78664301	78664400	100	7.60547e-07	5' UTR	195434	ENSMUST00000151622.1	5861	ENSMUSG00000079470	Utp14b	UTP14B small subunit processome component
377	chr1	78664501	78665000	500	0.000316463	Exon (ENSMUST00000053760.11/195434, exon 3 of 3)	74205	ENSMUST00000135642.1	-5893	ENSMUSG00000032883	Acsl3	acyl-CoA synthetase long-chain family member 3
378	chr1	78665201	78665500	300	0.000290066	Exon (ENSMUST00000053760.11/195434, exon 3 of 3)	74205	ENSMUST00000135642.1	-5393	ENSMUSG00000032883	Acsl3	acyl-CoA synthetase long-chain family member 3
379	chr1	78665601	78665700	100	0.000188117	Exon (ENSMUST00000053760.11/195434, exon 3 of 3)	74205	ENSMUST00000135642.1	-5193	ENSMUSG00000032883	Acsl3	acyl-CoA synthetase long-chain family member 3
380	chr1	78665801	78665900	100	0.000736488	Exon (ENSMUST00000053760.11/195434, exon 3 of 3)	74205	ENSMUST00000135642.1	-4993	ENSMUSG00000032883	Acsl3	acyl-CoA synthetase long-chain family member 3
381	chr1	78666001	78666100	100	0.000188117	Exon (ENSMUST00000053760.11/195434, exon 3 of 3)	74205	ENSMUST00000135642.1	-4793	ENSMUSG00000032883	Acsl3	acyl-CoA synthetase long-chain family member 3
382	chr1	78666201	78666300	100	4.29435e-05	Exon (ENSMUST00000053760.11/195434, exon 3 of 3)	74205	ENSMUST00000135642.1	-4593	ENSMUSG00000032883	Acsl3	acyl-CoA synthetase long-chain family member 3
383	chr1	78666401	78666500	100	3.99162e-06	Exon (ENSMUST00000053760.11/195434, exon 3 of 3)	74205	ENSMUST00000135642.1	-4393	ENSMUSG00000032883	Acsl3	acyl-CoA synthetase long-chain family member 3
384	chr1	78666601	78666700	100	0.000188117	Exon (ENSMUST00000053760.11/195434, exon 3 of 3)	74205	ENSMUST00000135642.1	-4193	ENSMUSG00000032883	Acsl3	acyl-CoA synthetase long-chain family member 3
385	chr1	78667001	78667100	100	9.07675e-05	3' UTR	74205	ENSMUST00000135642.1	-3793	ENSMUSG00000032883	Acsl3	acyl-CoA synthetase long-chain family member 3
386	chr1	78667601	78667700	100	1.98676e-05	3' UTR	74205	ENSMUST00000135642.1	-3193	ENSMUSG00000032883	Acsl3	acyl-CoA synthetase long-chain family member 3
387	chr1	78675301	78675400	100	0.000376653	Intron (ENSMUST00000035779.14/74205, intron 2 of 15)	74205	ENSMUST00000135642.1	4408	ENSMUSG00000032883	Acsl3	acyl-CoA synthetase long-chain family member 3
388	chr1	78680101	78680200	100	0.000736488	Intron (ENSMUST00000035779.14/74205, intron 2 of 15)	74205	ENSMUST00000132997.1	-1740	ENSMUSG00000032883	Acsl3	acyl-CoA synthetase long-chain family member 3
389	chr1	78685401	78685500	100	0.000736488	Intron (ENSMUST00000035779.14/74205, intron 3 of 15)	74205	ENSMUST00000132997.1	3461	ENSMUSG00000032883	Acsl3	acyl-CoA synthetase long-chain family member 3
390	chr1	78706301	78706500	200	0.000378178	3' UTR	74205	ENSMUST00000148608.1	9645	ENSMUSG00000032883	Acsl3	acyl-CoA synthetase long-chain family member 3
391	chr1	79704201	79704300	100	0.000376653	3' UTR	69368	ENSMUST00000130714.7	25798	ENSMUSG00000073643	Wdfy1	WD repeat and FYVE domain containing 1
392	chr1	79717301	79717400	100	9.07675e-05	3' UTR	69368	ENSMUST00000130714.7	12698	ENSMUSG00000073643	Wdfy1	WD repeat and FYVE domain containing 1
393	chr1	79717901	79718000	100	1.98676e-05	Intron (ENSMUST00000113512.7/69368, intron 6 of 11)	69368	ENSMUST00000130714.7	12098	ENSMUSG00000073643	Wdfy1	WD repeat and FYVE domain containing 1
394	chr1	79719001	79719100	100	1.75465e-06	3' UTR	69368	ENSMUST00000130714.7	10998	ENSMUSG00000073643	Wdfy1	WD repeat and FYVE domain containing 1
395	chr1	79726501	79726600	100	9.07675e-05	Exon (ENSMUST00000113512.7/69368, exon 5 of 12)	69368	ENSMUST00000130714.7	3498	ENSMUSG00000073643	Wdfy1	WD repeat and FYVE domain containing 1
396	chr1	80282901	80283000	100	0.000188117	Intron (ENSMUST00000163119.7/26554, intron 7 of 15)	26554	ENSMUST00000168372.1	-5460	ENSMUSG00000004364	Cul3	cullin 3
397	chr1	80286901	80287000	100	0.000376653	Exon (ENSMUST00000163119.7/26554, exon 6 of 16)	26554	ENSMUST00000168372.1	-9460	ENSMUSG00000004364	Cul3	cullin 3
398	chr1	84724301	84724400	100	0.000376653	3' UTR	14897	ENSMUST00000191187.1	4476	ENSMUSG00000026219	Trip12	thyroid hormone receptor interactor 12
399	chr1	84731601	84731700	100	0.000736488	Exon (ENSMUST00000027421.12/14897, exon 35 of 41)	14897	ENSMUST00000187733.1	3	ENSMUSG00000026219	Trip12	thyroid hormone receptor interactor 12
400	chr1	84733101	84733200	100	0.000376653	Intron (ENSMUST00000027421.12/14897, intron 33 of 40)	14897	ENSMUST00000185720.1	-1327	ENSMUSG00000026219	Trip12	thyroid hormone receptor interactor 12
401	chr1	84746601	84746700	100	1.98676e-05	Intron (ENSMUST00000027421.12/14897, intron 25 of 40)	14897	ENSMUST00000189670.6	2577	ENSMUSG00000026219	Trip12	thyroid hormone receptor interactor 12
402	chr1	84749101	84749200	100	0.000376653	Exon (ENSMUST00000027421.12/14897, exon 24 of 41)	14897	ENSMUST00000189670.6	77	ENSMUSG00000026219	Trip12	thyroid hormone receptor interactor 12
403	chr1	84750601	84750700	100	9.07675e-05	Intron (ENSMUST00000027421.12/14897, intron 22 of 40)	14897	ENSMUST00000190125.1	-58	ENSMUSG00000026219	Trip12	thyroid hormone receptor interactor 12
404	chr1	84779601	84779700	100	0.000736488	Intron (ENSMUST00000027421.12/14897, intron 5 of 40)	14897	ENSMUST00000185672.1	-12886	ENSMUSG00000026219	Trip12	thyroid hormone receptor interactor 12
405	chr1	84793601	84793900	300	3.16951e-05	Exon (ENSMUST00000027421.12/14897, exon 3 of 41)	14897	ENSMUST00000190464.6	-50	ENSMUSG00000026219	Trip12	thyroid hormone receptor interactor 12
406	chr1	84794001	84794100	100	0.000188117	Exon (ENSMUST00000027421.12/14897, exon 3 of 41)	14897	ENSMUST00000190464.6	-450	ENSMUSG00000026219	Trip12	thyroid hormone receptor interactor 12
407	chr1	85039701	85039800	100	0.000376653	Intron (ENSMUST00000159114.1/ENSMUST00000159114.1, intron 2 of 2)	381287	ENSMUST00000161724.7	69649	ENSMUSG00000089844	A530032D15Rik	RIKEN cDNA A530032D15Rik gene
408	chr1	86357201	86357300	100	4.29435e-05	Exon (ENSMUST00000027438.7/17975, exon 3 of 14)	80828	ENSMUST00000082889.1	-871	ENSMUSG00000064823	Snord82	small nucleolar RNA, C/D box 82
409	chr1	86526701	86526800	100	1.73096e-14	Promoter	19231	ENSMUST00000045897.14	0	ENSMUSG00000026238	Ptma	prothymosin alpha
410	chr1	86528101	86528200	100	0.000736488	Intron (ENSMUST00000045897.14/19231, intron 1 of 4)	19231	ENSMUST00000188533.1	1294	ENSMUSG00000026238	Ptma	prothymosin alpha
411	chr1	86529901	86530200	300	1.43146e-05	3' UTR	19231	ENSMUST00000188533.1	3094	ENSMUSG00000026238	Ptma	prothymosin alpha
412	chr1	86530401	86530500	100	1.02522e-08	3' UTR	19231	ENSMUST00000188533.1	3594	ENSMUSG00000026238	Ptma	prothymosin alpha
413	chr1	86721101	86721200	100	4.29435e-05	Intron (ENSMUST00000188121.6/208718, intron 1 of 3)	208718	ENSMUST00000065694.7	17258	ENSMUSG00000053333	Dis3l2	DIS3 like 3'-5' exoribonuclease 2
414	chr1	86909401	86909500	100	1.73096e-14	Exon (ENSMUST00000120149.1/ENSMUST00000120149.1, exon 1 of 1)	11650	ENSMUST00000190082.1	180305	ENSMUSG00000026246	Alppl2	alkaline phosphatase, placental-like 2
415	chr1	87076901	87077000	100	4.29435e-05	Distal Intergenic	11650	ENSMUST00000190082.1	12805	ENSMUSG00000026246	Alppl2	alkaline phosphatase, placental-like 2
416	chr1	87077101	87077200	100	0.000736488	Distal Intergenic	11650	ENSMUST00000190082.1	12605	ENSMUSG00000026246	Alppl2	alkaline phosphatase, placental-like 2
417	chr1	87078601	87078700	100	0.000376653	Distal Intergenic	11650	ENSMUST00000190082.1	11105	ENSMUSG00000026246	Alppl2	alkaline phosphatase, placental-like 2
418	chr1	87227801	87227900	100	0.000736488	3' UTR	26987	ENSMUST00000113231.3	13515	ENSMUSG00000026254	Eif4e2	eukaryotic translation initiation factor 4E member 2
419	chr1	87231901	87232100	200	0.000556571	Intron (ENSMUST00000050876.13/26987, intron 6 of 6)	26987	ENSMUST00000113231.3	17615	ENSMUSG00000026254	Eif4e2	eukaryotic translation initiation factor 4E member 2
420	chr1	87776901	87777100	200	2.93791e-08	Exon (ENSMUST00000157343.1/ENSMUST00000157343.1, exon 1 of 1)	77040	ENSMUST00000139628.1	1336	ENSMUSG00000026289	Atg16l1	autophagy related 16-like 1 (S. cerevisiae)
421	chr1	87784501	87784700	200	4.48816e-06	Promoter	100217415	ENSMUST00000158656.1	0	ENSMUSG00000089281	Scarna6	small Cajal body-specific RNA 6
422	chr1	87944001	87944100	100	0.000376653	3' UTR	227333	ENSMUST00000189448.1	5616	ENSMUSG00000070738	Dgkd	diacylglycerol kinase, delta
423	chr1	87970901	87971000	100	0.000188117	Intron (ENSMUST00000189409.6/227334, intron 1 of 12)	227334	ENSMUST00000189409.6	4898	ENSMUSG00000005501	Usp40	ubiquitin specific peptidase 40
424	chr1	88701801	88701900	100	0.000188117	5' UTR	320982	ENSMUST00000159814.1	321	ENSMUSG00000049866	Arl4c	ADP-ribosylation factor-like 4C
425	chr1	89456501	89456600	100	0.000376653	Exon (ENSMUST00000185417.1/ENSMUST00000185417.1, exon 1 of 1)	347722	ENSMUST00000190096.6	1627	ENSMUSG00000055013	Agap1	ArfGAP with GTPase domain, ankyrin repeat and PH domain 1
426	chr1	89457601	89457700	100	0.000376653	Exon (ENSMUST00000185417.1/ENSMUST00000185417.1, exon 1 of 1)	347722	ENSMUST00000190096.6	2727	ENSMUSG00000055013	Agap1	ArfGAP with GTPase domain, ankyrin repeat and PH domain 1
427	chr1	89460601	89460700	100	0.000376653	Intron (ENSMUST00000027521.14/347722, intron 1 of 17)	347722	ENSMUST00000190096.6	5727	ENSMUSG00000055013	Agap1	ArfGAP with GTPase domain, ankyrin repeat and PH domain 1
428	chr1	89471301	89471400	100	0.000736488	Intron (ENSMUST00000027521.14/347722, intron 1 of 17)	347722	ENSMUST00000190096.6	16427	ENSMUSG00000055013	Agap1	ArfGAP with GTPase domain, ankyrin repeat and PH domain 1
429	chr1	89490501	89490600	100	0.000736488	Intron (ENSMUST00000027521.14/347722, intron 1 of 17)	347722	ENSMUST00000190096.6	35627	ENSMUSG00000055013	Agap1	ArfGAP with GTPase domain, ankyrin repeat and PH domain 1
430	chr1	89497201	89497300	100	0.000376653	Intron (ENSMUST00000027521.14/347722, intron 1 of 17)	347722	ENSMUST00000190096.6	42327	ENSMUSG00000055013	Agap1	ArfGAP with GTPase domain, ankyrin repeat and PH domain 1
431	chr1	89508701	89508800	100	0.000736488	Intron (ENSMUST00000027521.14/347722, intron 1 of 17)	347722	ENSMUST00000190096.6	53827	ENSMUSG00000055013	Agap1	ArfGAP with GTPase domain, ankyrin repeat and PH domain 1
432	chr1	89514001	89514100	100	0.000376653	Intron (ENSMUST00000027521.14/347722, intron 1 of 17)	347722	ENSMUST00000190096.6	59127	ENSMUSG00000055013	Agap1	ArfGAP with GTPase domain, ankyrin repeat and PH domain 1
433	chr1	89524401	89524500	100	0.000736488	Intron (ENSMUST00000027521.14/347722, intron 1 of 17)	347722	ENSMUST00000074945.7	-55736	ENSMUSG00000055013	Agap1	ArfGAP with GTPase domain, ankyrin repeat and PH domain 1
434	chr1	89528101	89528200	100	0.000736488	Intron (ENSMUST00000027521.14/347722, intron 1 of 17)	347722	ENSMUST00000074945.7	-52036	ENSMUSG00000055013	Agap1	ArfGAP with GTPase domain, ankyrin repeat and PH domain 1
435	chr1	89529501	89529600	100	8.97631e-06	Intron (ENSMUST00000027521.14/347722, intron 1 of 17)	347722	ENSMUST00000074945.7	-50636	ENSMUSG00000055013	Agap1	ArfGAP with GTPase domain, ankyrin repeat and PH domain 1
436	chr1	89530601	89530700	100	0.000376653	Intron (ENSMUST00000027521.14/347722, intron 1 of 17)	347722	ENSMUST00000074945.7	-49536	ENSMUSG00000055013	Agap1	ArfGAP with GTPase domain, ankyrin repeat and PH domain 1
437	chr1	89554501	89554600	100	0.000736488	Intron (ENSMUST00000027521.14/347722, intron 1 of 17)	347722	ENSMUST00000074945.7	-25636	ENSMUSG00000055013	Agap1	ArfGAP with GTPase domain, ankyrin repeat and PH domain 1
438	chr1	89581201	89581300	100	0.000736488	Exon (ENSMUST00000074945.7/347722, exon 1 of 18)	347722	ENSMUST00000074945.7	965	ENSMUSG00000055013	Agap1	ArfGAP with GTPase domain, ankyrin repeat and PH domain 1
439	chr1	89617501	89617600	100	0.000188117	Intron (ENSMUST00000027521.14/347722, intron 3 of 17)	347722	ENSMUST00000074945.7	37265	ENSMUSG00000055013	Agap1	ArfGAP with GTPase domain, ankyrin repeat and PH domain 1
440	chr1	89625101	89625200	100	0.000736488	Intron (ENSMUST00000027521.14/347722, intron 3 of 17)	347722	ENSMUST00000074945.7	44865	ENSMUSG00000055013	Agap1	ArfGAP with GTPase domain, ankyrin repeat and PH domain 1
441	chr1	89635101	89635200	100	0.000376653	Intron (ENSMUST00000027521.14/347722, intron 6 of 17)	74403	ENSMUST00000187011.1	48688	NA	4933400F21Rik	RIKEN cDNA 4933400F21 gene
442	chr1	89640601	89640700	100	0.000736488	Intron (ENSMUST00000027521.14/347722, intron 6 of 17)	74403	ENSMUST00000187011.1	43188	NA	4933400F21Rik	RIKEN cDNA 4933400F21 gene
443	chr1	89648901	89649000	100	0.000736488	Intron (ENSMUST00000027521.14/347722, intron 6 of 17)	74403	ENSMUST00000187011.1	34888	NA	4933400F21Rik	RIKEN cDNA 4933400F21 gene
444	chr1	89651601	89651700	100	0.000376653	Intron (ENSMUST00000027521.14/347722, intron 6 of 17)	74403	ENSMUST00000187011.1	32188	NA	4933400F21Rik	RIKEN cDNA 4933400F21 gene
445	chr1	89669101	89669200	100	0.000736488	Intron (ENSMUST00000027521.14/347722, intron 8 of 17)	74403	ENSMUST00000187011.1	14688	NA	4933400F21Rik	RIKEN cDNA 4933400F21 gene
446	chr1	89672101	89672200	100	0.000376653	Intron (ENSMUST00000027521.14/347722, intron 9 of 17)	74403	ENSMUST00000187011.1	11688	NA	4933400F21Rik	RIKEN cDNA 4933400F21 gene
447	chr1	89673101	89673200	100	0.000736488	Intron (ENSMUST00000027521.14/347722, intron 9 of 17)	74403	ENSMUST00000187011.1	10688	NA	4933400F21Rik	RIKEN cDNA 4933400F21 gene
448	chr1	89674601	89674700	100	0.000188117	Intron (ENSMUST00000027521.14/347722, intron 9 of 17)	74403	ENSMUST00000187011.1	9188	NA	4933400F21Rik	RIKEN cDNA 4933400F21 gene
449	chr1	89678001	89678100	100	0.000736488	Exon (ENSMUST00000187295.1/74403, exon 4 of 4)	74403	ENSMUST00000187011.1	5788	NA	4933400F21Rik	RIKEN cDNA 4933400F21 gene
450	chr1	89681401	89681500	100	0.000736488	Intron (ENSMUST00000027521.14/347722, intron 9 of 17)	74403	ENSMUST00000187011.1	2388	NA	4933400F21Rik	RIKEN cDNA 4933400F21 gene
451	chr1	89682001	89682100	100	0.000736488	Intron (ENSMUST00000027521.14/347722, intron 9 of 17)	74403	ENSMUST00000187011.1	1788	NA	4933400F21Rik	RIKEN cDNA 4933400F21 gene
452	chr1	89685301	89685400	100	0.000736488	Intron (ENSMUST00000027521.14/347722, intron 9 of 17)	74403	ENSMUST00000186098.6	-1393	NA	4933400F21Rik	RIKEN cDNA 4933400F21 gene
453	chr1	89686701	89686800	100	0.000736488	Intron (ENSMUST00000027521.14/347722, intron 9 of 17)	74403	ENSMUST00000186098.6	-2793	NA	4933400F21Rik	RIKEN cDNA 4933400F21 gene
454	chr1	89708501	89708600	100	0.000736488	Intron (ENSMUST00000027521.14/347722, intron 9 of 17)	74403	ENSMUST00000186098.6	-24593	NA	4933400F21Rik	RIKEN cDNA 4933400F21 gene
455	chr1	89725501	89725600	100	0.000736488	Intron (ENSMUST00000027521.14/347722, intron 9 of 17)	74403	ENSMUST00000186098.6	-41593	NA	4933400F21Rik	RIKEN cDNA 4933400F21 gene
456	chr1	89743301	89743400	100	0.000376653	Intron (ENSMUST00000027521.14/347722, intron 10 of 17)	347722	ENSMUST00000212924.1	-45763	ENSMUSG00000055013	Agap1	ArfGAP with GTPase domain, ankyrin repeat and PH domain 1
457	chr1	89795201	89795300	100	0.000736488	Intron (ENSMUST00000027521.14/347722, intron 13 of 17)	347722	ENSMUST00000212924.1	6038	ENSMUSG00000055013	Agap1	ArfGAP with GTPase domain, ankyrin repeat and PH domain 1
458	chr1	89800101	89800200	100	0.000376653	Intron (ENSMUST00000027521.14/347722, intron 13 of 17)	347722	ENSMUST00000212924.1	10938	ENSMUSG00000055013	Agap1	ArfGAP with GTPase domain, ankyrin repeat and PH domain 1
459	chr1	89800601	89800700	100	0.000736488	Intron (ENSMUST00000027521.14/347722, intron 13 of 17)	347722	ENSMUST00000212924.1	11438	ENSMUSG00000055013	Agap1	ArfGAP with GTPase domain, ankyrin repeat and PH domain 1
460	chr1	89806301	89806400	100	0.000736488	Intron (ENSMUST00000027521.14/347722, intron 13 of 17)	347722	ENSMUST00000212924.1	17138	ENSMUSG00000055013	Agap1	ArfGAP with GTPase domain, ankyrin repeat and PH domain 1
461	chr1	89812501	89812600	100	0.000736488	Intron (ENSMUST00000027521.14/347722, intron 13 of 17)	347722	ENSMUST00000212924.1	23338	ENSMUSG00000055013	Agap1	ArfGAP with GTPase domain, ankyrin repeat and PH domain 1
462	chr1	89814201	89814300	100	0.000736488	Intron (ENSMUST00000027521.14/347722, intron 13 of 17)	347722	ENSMUST00000212924.1	25038	ENSMUSG00000055013	Agap1	ArfGAP with GTPase domain, ankyrin repeat and PH domain 1
463	chr1	89814701	89814800	100	0.000736488	Intron (ENSMUST00000027521.14/347722, intron 13 of 17)	347722	ENSMUST00000212924.1	25538	ENSMUSG00000055013	Agap1	ArfGAP with GTPase domain, ankyrin repeat and PH domain 1
464	chr1	89818501	89818600	100	0.000736488	Intron (ENSMUST00000027521.14/347722, intron 13 of 17)	347722	ENSMUST00000212924.1	29338	ENSMUSG00000055013	Agap1	ArfGAP with GTPase domain, ankyrin repeat and PH domain 1
465	chr1	89821401	89821500	100	0.000736488	Intron (ENSMUST00000027521.14/347722, intron 13 of 17)	347722	ENSMUST00000212924.1	32238	ENSMUSG00000055013	Agap1	ArfGAP with GTPase domain, ankyrin repeat and PH domain 1
466	chr1	89849201	89849300	100	0.000736488	Intron (ENSMUST00000027521.14/347722, intron 16 of 17)	347722	ENSMUST00000212924.1	60038	ENSMUSG00000055013	Agap1	ArfGAP with GTPase domain, ankyrin repeat and PH domain 1
467	chr1	89849801	89849900	100	0.000376653	Intron (ENSMUST00000027521.14/347722, intron 16 of 17)	347722	ENSMUST00000212924.1	60638	ENSMUSG00000055013	Agap1	ArfGAP with GTPase domain, ankyrin repeat and PH domain 1
468	chr1	89853301	89853400	100	0.000376653	Intron (ENSMUST00000027521.14/347722, intron 16 of 17)	347722	ENSMUST00000212924.1	64138	ENSMUSG00000055013	Agap1	ArfGAP with GTPase domain, ankyrin repeat and PH domain 1
469	chr1	89863101	89863200	100	0.000376653	Intron (ENSMUST00000027521.14/347722, intron 16 of 17)	14472	ENSMUST00000036954.8	67979	ENSMUSG00000034486	Gbx2	gastrulation brain homeobox 2
470	chr1	89887501	89887600	100	8.97631e-06	Exon (ENSMUST00000027521.14/347722, exon 17 of 18)	14472	ENSMUST00000036954.8	43579	ENSMUSG00000034486	Gbx2	gastrulation brain homeobox 2
471	chr1	89888901	89889100	200	0.000378178	3' UTR	14472	ENSMUST00000036954.8	42079	ENSMUSG00000034486	Gbx2	gastrulation brain homeobox 2
472	chr1	89889201	89889300	100	0.000736488	3' UTR	14472	ENSMUST00000036954.8	41879	ENSMUSG00000034486	Gbx2	gastrulation brain homeobox 2
473	chr1	89890001	89890100	100	0.000376653	3' UTR	14472	ENSMUST00000036954.8	41079	ENSMUSG00000034486	Gbx2	gastrulation brain homeobox 2
474	chr1	89890201	89890300	100	0.000376653	3' UTR	14472	ENSMUST00000036954.8	40879	ENSMUSG00000034486	Gbx2	gastrulation brain homeobox 2
475	chr1	89891301	89891400	100	0.000736488	3' UTR	14472	ENSMUST00000036954.8	39779	ENSMUSG00000034486	Gbx2	gastrulation brain homeobox 2
476	chr1	89891501	89891600	100	0.000736488	3' UTR	14472	ENSMUST00000036954.8	39579	ENSMUSG00000034486	Gbx2	gastrulation brain homeobox 2
477	chr1	89891701	89891800	100	0.000188117	3' UTR	14472	ENSMUST00000036954.8	39379	ENSMUSG00000034486	Gbx2	gastrulation brain homeobox 2
478	chr1	89892701	89892800	100	0.000736488	3' UTR	14472	ENSMUST00000036954.8	38379	ENSMUSG00000034486	Gbx2	gastrulation brain homeobox 2
479	chr1	89894001	89894200	200	0.00019826	3' UTR	14472	ENSMUST00000036954.8	36979	ENSMUSG00000034486	Gbx2	gastrulation brain homeobox 2
480	chr1	89894601	89894700	100	0.000376653	3' UTR	14472	ENSMUST00000036954.8	36479	ENSMUSG00000034486	Gbx2	gastrulation brain homeobox 2
481	chr1	91103401	91103500	100	0.000736488	Intron (ENSMUST00000189505.6/16978, intron 10 of 12)	16978	ENSMUST00000188094.6	-7714	ENSMUSG00000026305	Lrrfip1	leucine rich repeat (in FLII) interacting protein 1
482	chr1	91114001	91114100	100	0.000736488	Intron (ENSMUST00000185531.6/16978, intron 20 of 21)	16978	ENSMUST00000188708.1	2768	ENSMUSG00000026305	Lrrfip1	leucine rich repeat (in FLII) interacting protein 1
483	chr1	91114601	91114700	100	0.000376653	Exon (ENSMUST00000097649.9/16978, exon 8 of 8)	16978	ENSMUST00000188708.1	3368	ENSMUSG00000026305	Lrrfip1	leucine rich repeat (in FLII) interacting protein 1
484	chr1	91254501	91254600	100	0.000736488	Intron (ENSMUST00000188576.1/67921, intron 2 of 4)	67921	ENSMUST00000191533.1	3845	ENSMUSG00000034343	Ube2f	ubiquitin-conjugating enzyme E2F (putative)
485	chr1	91285301	91285500	200	0.000462303	3' UTR	67921	ENSMUST00000185950.1	9190	ENSMUSG00000034343	Ube2f	ubiquitin-conjugating enzyme E2F (putative)
486	chr1	91411601	91411700	100	0.000188117	3' UTR	55927	ENSMUST00000132188.7	1508	ENSMUSG00000067071	Hes6	hairy and enhancer of split 6
487	chr1	91450601	91450700	100	0.000736488	Exon (ENSMUST00000069620.9/18627, exon 2 of 23)	18627	ENSMUST00000185298.1	-736	ENSMUSG00000055866	Per2	period circadian clock 2
488	chr1	93405901	93406000	100	0.000188117	3' UTR	404545	ENSMUST00000190340.1	4040	ENSMUSG00000034107	Ano7	anoctamin 7
489	chr1	93406301	93406400	100	0.000736488	3' UTR	404545	ENSMUST00000190340.1	4440	ENSMUSG00000034107	Ano7	anoctamin 7
490	chr1	93406701	93406800	100	1.75465e-06	3' UTR	404545	ENSMUST00000190340.1	4840	ENSMUSG00000034107	Ano7	anoctamin 7
491	chr1	93407001	93407100	100	0.000376653	3' UTR	404545	ENSMUST00000190340.1	5140	ENSMUSG00000034107	Ano7	anoctamin 7
492	chr1	93407501	93407600	100	0.000376653	3' UTR	404545	ENSMUST00000190340.1	5640	ENSMUSG00000034107	Ano7	anoctamin 7
493	chr1	93407801	93407900	100	1.02522e-08	3' UTR	404545	ENSMUST00000190340.1	5940	ENSMUSG00000034107	Ano7	anoctamin 7
494	chr1	93408001	93408200	200	0.000372732	3' UTR	404545	ENSMUST00000190340.1	6140	ENSMUSG00000034107	Ano7	anoctamin 7
495	chr1	93408901	93409000	100	0.000736488	Exon (ENSMUST00000170883.7/110611, exon 25 of 28)	404545	ENSMUST00000190340.1	7040	ENSMUSG00000034107	Ano7	anoctamin 7
496	chr1	93419601	93419700	100	9.07675e-05	Intron (ENSMUST00000170883.7/110611, intron 17 of 27)	404545	ENSMUST00000190340.1	17740	ENSMUSG00000034107	Ano7	anoctamin 7
497	chr1	93425101	93425200	100	0.000376653	Intron (ENSMUST00000170883.7/110611, intron 12 of 27)	110611	ENSMUST00000186164.6	15592	ENSMUSG00000034088	Hdlbp	high density lipoprotein (HDL) binding protein
498	chr1	93431001	93431100	100	1.98676e-05	5' UTR	110611	ENSMUST00000186164.6	9692	ENSMUSG00000034088	Hdlbp	high density lipoprotein (HDL) binding protein
499	chr1	93437101	93437200	100	0.000736488	Exon (ENSMUST00000170883.7/110611, exon 5 of 28)	110611	ENSMUST00000186164.6	3592	ENSMUSG00000034088	Hdlbp	high density lipoprotein (HDL) binding protein
500	chr1	93508901	93509000	100	0.000376653	3' UTR	227377	ENSMUST00000120301.7	-3079	ENSMUSG00000034066	Farp2	FERM, RhoGEF and pleckstrin domain protein 2
501	chr1	93625801	93625900	100	0.000188117	Exon (ENSMUST00000027498.13/59041, exon 7 of 12)	59041	ENSMUST00000125778.1	-13	ENSMUSG00000026277	Stk25	serine/threonine kinase 25 (yeast)
502	chr1	93626201	93626600	400	0.000301416	Exon (ENSMUST00000027498.13/59041, exon 6 of 12)	59041	ENSMUST00000125778.1	-413	ENSMUSG00000026277	Stk25	serine/threonine kinase 25 (yeast)
503	chr1	93629001	93629100	100	0.000376653	Exon (ENSMUST00000027498.13/59041, exon 3 of 12)	59041	ENSMUST00000125778.1	-3213	ENSMUSG00000026277	Stk25	serine/threonine kinase 25 (yeast)
504	chr1	94468901	94469000	100	0.000188117	Exon (ENSMUST00000187459.1/ENSMUST00000187459.1, exon 1 of 1)	74689	ENSMUST00000190754.1	-328083	ENSMUSG00000100518	4930440C22Rik	RIKEN cDNA 4930440C22 gene
505	chr1	95498601	95498700	100	0.000736488	Exon (ENSMUST00000117288.1/ENSMUST00000117288.1, exon 1 of 1)	20452	ENSMUST00000189556.1	168835	ENSMUSG00000040710	St8sia4	ST8 alpha-N-acetyl-neuraminide alpha-2,8-sialyltransferase 4
506	chr1	95498801	95498900	100	2.92063e-10	Exon (ENSMUST00000117288.1/ENSMUST00000117288.1, exon 1 of 1)	20452	ENSMUST00000189556.1	168635	ENSMUSG00000040710	St8sia4	ST8 alpha-N-acetyl-neuraminide alpha-2,8-sialyltransferase 4
507	chr1	95830901	95831000	100	0.000376653	Distal Intergenic	75381	ENSMUST00000187352.1	-114383	ENSMUSG00000100777	4930598F16Rik	RIKEN cDNA 4930598F16 gene
508	chr1	95831201	95831300	100	0.000736488	Distal Intergenic	75381	ENSMUST00000187352.1	-114683	ENSMUSG00000100777	4930598F16Rik	RIKEN cDNA 4930598F16 gene
509	chr1	95831701	95831800	100	0.000188117	Distal Intergenic	75381	ENSMUST00000187352.1	-115183	ENSMUSG00000100777	4930598F16Rik	RIKEN cDNA 4930598F16 gene
510	chr1	97024901	97025300	400	0.000264579	Exon (ENSMUST00000054664.7/ENSMUST00000054664.7, exon 1 of 1)	67854	ENSMUST00000167383.7	-27324	ENSMUSG00000045463	Slco6b1	solute carrier organic anion transporter family, member 6b1
511	chr1	97821101	97821200	100	0.000376653	3' UTR	18484	ENSMUST00000160210.1	4785	ENSMUSG00000026335	Pam	peptidylglycine alpha-amidating monooxygenase
512	chr1	97948601	97948700	100	5.87583e-08	Intron (ENSMUST00000058762.14/18484, intron 3 of 25)	18484	ENSMUST00000159428.7	28368	ENSMUSG00000026335	Pam	peptidylglycine alpha-amidating monooxygenase
513	chr1	97949201	97949300	100	1.98676e-05	Exon (ENSMUST00000162698.1/ENSMUST00000162698.1, exon 1 of 1)	18484	ENSMUST00000159428.7	27768	ENSMUSG00000026335	Pam	peptidylglycine alpha-amidating monooxygenase
514	chr1	102628101	102628300	200	5.23872e-15	Distal Intergenic	100504525	ENSMUST00000187932.1	1472292	ENSMUSG00000100684	Gm20268	predicted gene, 20268
515	chr1	105457301	105457400	100	0.000188117	Exon (ENSMUST00000086725.5/ENSMUST00000086725.5, exon 2 of 2)	100504568	ENSMUST00000189938.1	100538	ENSMUSG00000097482	Gm17634	predicted gene, 17634
516	chr1	105457501	105457600	100	3.99162e-06	Exon (ENSMUST00000086725.5/ENSMUST00000086725.5, exon 2 of 2)	100504568	ENSMUST00000189938.1	100738	ENSMUSG00000097482	Gm17634	predicted gene, 17634
517	chr1	105664101	105664200	100	0.000736488	5' UTR	227446	ENSMUST00000191150.1	164	ENSMUSG00000026319	Relch	RAB11 binding and LisH domain, coiled-coil and HEAT repeat containing
518	chr1	105737301	105737400	100	0.000736488	Exon (ENSMUST00000191293.6/227446, exon 22 of 22)	227446	ENSMUST00000190459.6	-2812	ENSMUSG00000026319	Relch	RAB11 binding and LisH domain, coiled-coil and HEAT repeat containing
519	chr1	105738001	105738100	100	0.000376653	Exon (ENSMUST00000191293.6/227446, exon 22 of 22)	227446	ENSMUST00000190459.6	-2112	ENSMUSG00000026319	Relch	RAB11 binding and LisH domain, coiled-coil and HEAT repeat containing
520	chr1	105738301	105738400	100	0.000376653	Exon (ENSMUST00000191293.6/227446, exon 22 of 22)	227446	ENSMUST00000190459.6	-1812	ENSMUSG00000026319	Relch	RAB11 binding and LisH domain, coiled-coil and HEAT repeat containing
521	chr1	119588001	119588100	100	0.000188117	Intron (ENSMUST00000052404.12/226352, intron 16 of 24)	226352	ENSMUST00000185467.1	11140	ENSMUSG00000026383	Epb41l5	erythrocyte membrane protein band 4.1 like 5
522	chr1	119620801	119620900	100	9.07675e-05	Intron (ENSMUST00000052404.12/226352, intron 5 of 24)	226352	ENSMUST00000189042.1	13100	ENSMUSG00000026383	Epb41l5	erythrocyte membrane protein band 4.1 like 5
523	chr1	120067501	120067600	100	0.000376653	3' UTR	170706	ENSMUST00000056089.7	6474	ENSMUSG00000050777	Tmem37	transmembrane protein 37
524	chr1	120113301	120113400	100	5.87583e-08	3' UTR	13167	ENSMUST00000112648.7	6738	ENSMUSG00000026385	Dbi	diazepam binding inhibitor
525	chr1	121305001	121305100	100	1.75465e-06	3' UTR	72999	ENSMUST00000159528.1	2218	ENSMUSG00000003721	Insig2	insulin induced gene 2
526	chr1	121319601	121319700	100	0.000736488	Exon (ENSMUST00000003818.13/72999, exon 2 of 6)	72999	ENSMUST00000162019.1	28	ENSMUSG00000003721	Insig2	insulin induced gene 2
527	chr1	125393501	125393600	100	0.000376653	3' UTR	74117	ENSMUST00000186008.6	4012	ENSMUSG00000026341	Actr3	ARP3 actin-related protein 3
528	chr1	125428301	125428400	100	0.000736488	Intron (ENSMUST00000027579.16/74117, intron 2 of 12)	74117	ENSMUST00000191544.6	6246	ENSMUSG00000026341	Actr3	ARP3 actin-related protein 3
529	chr1	127774601	127774700	100	0.000188117	Intron (ENSMUST00000125760.7/72949, intron 1 of 3)	72949	ENSMUST00000027587.14	437	ENSMUSG00000026349	Ccnt2	cyclin T2
530	chr1	127787001	127787100	100	0.000736488	Intron (ENSMUST00000125760.7/72949, intron 2 of 3)	72949	ENSMUST00000153359.1	-9471	ENSMUSG00000026349	Ccnt2	cyclin T2
531	chr1	127798501	127798600	100	0.000376653	Intron (ENSMUST00000112570.1/72949, intron 6 of 9)	72949	ENSMUST00000153359.1	1930	ENSMUSG00000026349	Ccnt2	cyclin T2
532	chr1	127802101	127802500	400	0.000552381	Exon (ENSMUST00000112570.1/72949, exon 9 of 10)	72949	ENSMUST00000153359.1	5530	ENSMUSG00000026349	Ccnt2	cyclin T2
533	chr1	127802601	127802800	200	0.000413628	Exon (ENSMUST00000112570.1/72949, exon 9 of 10)	72949	ENSMUST00000153359.1	6030	ENSMUSG00000026349	Ccnt2	cyclin T2
534	chr1	127803401	127803500	100	1.75465e-06	3' UTR	72949	ENSMUST00000153359.1	6830	ENSMUSG00000026349	Ccnt2	cyclin T2
535	chr1	127804101	127804300	200	9.44387e-05	3' UTR	72949	ENSMUST00000153359.1	7530	ENSMUSG00000026349	Ccnt2	cyclin T2
536	chr1	128038501	128038700	200	9.49357e-05	Exon (ENSMUST00000121497.1/ENSMUST00000121497.1, exon 1 of 1)	226409	ENSMUST00000131732.1	-19808	ENSMUSG00000036086	Zranb3	zinc finger, RAN-binding domain containing 3
537	chr1	128184401	128184500	100	0.000188117	Exon (ENSMUST00000187900.6/226412, exon 15 of 16)	226412	ENSMUST00000190056.2	2660	ENSMUSG00000056211	R3hdm1	R3H domain containing 1
538	chr1	128236401	128236500	100	0.000736488	Exon (ENSMUST00000036288.10/226412, exon 27 of 27)	226412	ENSMUST00000188570.1	1022	ENSMUSG00000056211	R3hdm1	R3H domain containing 1
539	chr1	129801501	129801600	100	4.29435e-05	Exon (ENSMUST00000086596.1/ENSMUST00000086596.1, exon 1 of 1)	210417	ENSMUST00000151700.7	-113939	ENSMUSG00000042581	Thsd7b	thrombospondin, type I, domain containing 7B
540	chr1	130691701	130691800	100	0.000736488	Exon (ENSMUST00000187522.1/ENSMUST00000187522.1, exon 1 of 1)	12270	ENSMUST00000189393.1	-7630	NA	C4bp-ps1	complement component 4 binding protein, pseudogene 1
541	chr1	130694001	130694100	100	0.000736488	Intron (ENSMUST00000188520.1/18640, intron 12 of 17)	12270	ENSMUST00000189393.1	-9930	NA	C4bp-ps1	complement component 4 binding protein, pseudogene 1
542	chr1	130695201	130695300	100	0.000736488	Intron (ENSMUST00000188520.1/18640, intron 12 of 17)	12270	ENSMUST00000189393.1	-11130	NA	C4bp-ps1	complement component 4 binding protein, pseudogene 1
543	chr1	130695501	130695600	100	0.000376653	Intron (ENSMUST00000188520.1/18640, intron 12 of 17)	12270	ENSMUST00000189393.1	-11430	NA	C4bp-ps1	complement component 4 binding protein, pseudogene 1
544	chr1	130733201	130733300	100	9.07675e-05	Intron (ENSMUST00000039323.7/212439, intron 1 of 3)	212439	ENSMUST00000186185.1	1091	ENSMUSG00000042510	AA986860	expressed sequence AA986860
545	chr1	130733501	130733600	100	8.97631e-06	Intron (ENSMUST00000039323.7/212439, intron 1 of 3)	212439	ENSMUST00000186185.1	1391	ENSMUSG00000042510	AA986860	expressed sequence AA986860
546	chr1	130734101	130734200	100	0.000736488	Intron (ENSMUST00000039323.7/212439, intron 1 of 3)	212439	ENSMUST00000186185.1	1991	ENSMUSG00000042510	AA986860	expressed sequence AA986860
547	chr1	130734801	130734900	100	0.000736488	Intron (ENSMUST00000039323.7/212439, intron 1 of 3)	212439	ENSMUST00000186185.1	2691	ENSMUSG00000042510	AA986860	expressed sequence AA986860
548	chr1	130735301	130735400	100	0.000376653	Intron (ENSMUST00000039323.7/212439, intron 1 of 3)	212439	ENSMUST00000186185.1	3191	ENSMUSG00000042510	AA986860	expressed sequence AA986860
549	chr1	130737801	130737900	100	0.000736488	Intron (ENSMUST00000039323.7/212439, intron 2 of 3)	212439	ENSMUST00000190859.1	-2372	ENSMUSG00000042510	AA986860	expressed sequence AA986860
550	chr1	130738901	130739000	100	0.000188117	Intron (ENSMUST00000039323.7/212439, intron 2 of 3)	212439	ENSMUST00000190859.1	-1272	ENSMUSG00000042510	AA986860	expressed sequence AA986860
551	chr1	130740301	130740400	100	0.000736488	Exon (ENSMUST00000190859.1/212439, exon 1 of 2)	212439	ENSMUST00000190859.1	29	ENSMUSG00000042510	AA986860	expressed sequence AA986860
552	chr1	130742301	130742400	100	1.98676e-05	Exon (ENSMUST00000039323.7/212439, exon 4 of 4)	212439	ENSMUST00000190859.1	2029	ENSMUSG00000042510	AA986860	expressed sequence AA986860
553	chr1	130743301	130743400	100	0.000736488	Exon (ENSMUST00000039323.7/212439, exon 4 of 4)	212439	ENSMUST00000190859.1	3029	ENSMUSG00000042510	AA986860	expressed sequence AA986860
554	chr1	130744101	130744200	100	0.000376653	3' UTR	212439	ENSMUST00000190859.1	3829	ENSMUSG00000042510	AA986860	expressed sequence AA986860
555	chr1	130744301	130744400	100	0.000736488	3' UTR	212439	ENSMUST00000190859.1	4029	ENSMUSG00000042510	AA986860	expressed sequence AA986860
556	chr1	130751501	130751600	100	0.000376653	Distal Intergenic	212439	ENSMUST00000190859.1	11229	ENSMUSG00000042510	AA986860	expressed sequence AA986860
557	chr1	130752601	130752700	100	0.000376653	Distal Intergenic	212439	ENSMUST00000190859.1	12329	ENSMUSG00000042510	AA986860	expressed sequence AA986860
558	chr1	130761101	130761200	100	9.07675e-05	Distal Intergenic	433347	ENSMUST00000189150.1	-5184	ENSMUSG00000100106	Gm28856	predicted gene 28856
559	chr1	131055001	131055100	100	0.000736488	3' UTR	17164	ENSMUST00000188459.3	17426	ENSMUSG00000016528	Mapkapk2	MAP kinase-activated protein kinase 2
560	chr1	131090001	131090100	100	0.000376653	Exon (ENSMUST00000191688.1/ENSMUST00000191688.1, exon 1 of 1)	17164	ENSMUST00000016672.10	7726	ENSMUSG00000016528	Mapkapk2	MAP kinase-activated protein kinase 2
561	chr1	131160401	131160500	100	0.000376653	3' UTR	16865	ENSMUST00000153651.1	-5879	ENSMUSG00000026427	Eif2d	eukaryotic translation initiation factor 2D
562	chr1	131164001	131164100	100	0.000188117	Intron (ENSMUST00000112446.8/16865, intron 8 of 14)	16865	ENSMUST00000153651.1	-2279	ENSMUSG00000026427	Eif2d	eukaryotic translation initiation factor 2D
563	chr1	131270501	131270600	100	0.000736488	Promoter	56489	ENSMUST00000163029.1	0	ENSMUSG00000042349	Ikbke	inhibitor of kappaB kinase epsilon
564	chr1	131288801	131288900	100	0.000736488	3' UTR	14270	ENSMUST00000188604.1	7480	ENSMUSG00000026425	Srgap2	SLIT-ROBO Rho GTPase activating protein 2
565	chr1	131643401	131643500	100	9.07675e-05	Intron (ENSMUST00000073350.12/13034, intron 1 of 9)	13034	ENSMUST00000112411.1	4907	ENSMUSG00000004552	Ctse	cathepsin E
566	chr1	131644501	131644600	100	0.000376653	Intron (ENSMUST00000073350.12/13034, intron 1 of 9)	13034	ENSMUST00000112411.1	6007	ENSMUSG00000004552	Ctse	cathepsin E
567	chr1	131644901	131645100	200	0.000188327	Intron (ENSMUST00000073350.12/13034, intron 1 of 9)	13034	ENSMUST00000112411.1	6407	ENSMUSG00000004552	Ctse	cathepsin E
568	chr1	131646501	131646600	100	5.23872e-15	Intron (ENSMUST00000073350.12/13034, intron 1 of 9)	13034	ENSMUST00000112411.1	8007	ENSMUSG00000004552	Ctse	cathepsin E
569	chr1	131648701	131649300	600	2.91092e-10	Intron (ENSMUST00000073350.12/13034, intron 1 of 9)	13034	ENSMUST00000112411.1	10207	ENSMUSG00000004552	Ctse	cathepsin E
570	chr1	131649401	131649600	200	0.000103992	Intron (ENSMUST00000073350.12/13034, intron 1 of 9)	13034	ENSMUST00000112411.1	10907	ENSMUSG00000004552	Ctse	cathepsin E
571	chr1	131649701	131650300	600	7.25053e-15	Intron (ENSMUST00000073350.12/13034, intron 1 of 9)	13034	ENSMUST00000112411.1	11207	ENSMUSG00000004552	Ctse	cathepsin E
572	chr1	131650401	131650700	300	5.23872e-15	Intron (ENSMUST00000073350.12/13034, intron 1 of 9)	13034	ENSMUST00000141061.1	-11211	ENSMUSG00000004552	Ctse	cathepsin E
573	chr1	131938801	131938900	100	0.000736488	Distal Intergenic	212980	ENSMUST00000191034.1	-24054	ENSMUSG00000026435	Slc45a3	solute carrier family 45, member 3
574	chr1	131954201	131954300	100	0.000376653	Distal Intergenic	212980	ENSMUST00000191034.1	-8654	ENSMUSG00000026435	Slc45a3	solute carrier family 45, member 3
575	chr1	132024401	132024500	100	0.000188117	3' UTR	213006	ENSMUST00000163016.1	4533	ENSMUSG00000059149	Mfsd4a	major facilitator superfamily domain containing 4A
576	chr1	132025501	132025600	100	0.000188117	3' UTR	213006	ENSMUST00000163016.1	3433	ENSMUSG00000059149	Mfsd4a	major facilitator superfamily domain containing 4A
577	chr1	132028401	132028500	100	0.000376653	3' UTR	213006	ENSMUST00000163016.1	533	ENSMUSG00000059149	Mfsd4a	major facilitator superfamily domain containing 4A
578	chr1	132031701	132031800	100	4.29435e-05	3' UTR	213006	ENSMUST00000163016.1	-2668	ENSMUSG00000059149	Mfsd4a	major facilitator superfamily domain containing 4A
579	chr1	132316101	132316300	200	5.90196e-11	Promoter	74137	ENSMUST00000072177.13	0	ENSMUSG00000009772	Nuak2	NUAK family, SNF1-like kinase, 2
580	chr1	132316501	132317200	700	9.32517e-05	Intron (ENSMUST00000072177.13/74137, intron 1 of 7)	74137	ENSMUST00000128661.1	336	ENSMUSG00000009772	Nuak2	NUAK family, SNF1-like kinase, 2
581	chr1	132317301	132317600	300	0.000371301	Exon (ENSMUST00000128661.1/74137, exon 2 of 2)	74137	ENSMUST00000128661.1	1136	ENSMUSG00000009772	Nuak2	NUAK family, SNF1-like kinase, 2
582	chr1	132317801	132317900	100	9.07675e-05	Intron (ENSMUST00000072177.13/74137, intron 1 of 7)	74137	ENSMUST00000128661.1	1636	ENSMUSG00000009772	Nuak2	NUAK family, SNF1-like kinase, 2
583	chr1	132318401	132318900	500	2.21637e-06	Intron (ENSMUST00000072177.13/74137, intron 1 of 7)	74137	ENSMUST00000128661.1	2236	ENSMUSG00000009772	Nuak2	NUAK family, SNF1-like kinase, 2
584	chr1	132319101	132319600	500	0.000149261	Intron (ENSMUST00000072177.13/74137, intron 1 of 7)	74137	ENSMUST00000128661.1	2936	ENSMUSG00000009772	Nuak2	NUAK family, SNF1-like kinase, 2
585	chr1	132319701	132319900	200	0.000369121	Intron (ENSMUST00000072177.13/74137, intron 1 of 7)	74137	ENSMUST00000128661.1	3536	ENSMUSG00000009772	Nuak2	NUAK family, SNF1-like kinase, 2
586	chr1	132320201	132320600	400	5.34327e-05	Intron (ENSMUST00000072177.13/74137, intron 1 of 7)	74137	ENSMUST00000128661.1	4036	ENSMUSG00000009772	Nuak2	NUAK family, SNF1-like kinase, 2
587	chr1	132320901	132321000	100	1.75465e-06	Intron (ENSMUST00000072177.13/74137, intron 1 of 7)	74137	ENSMUST00000128661.1	4736	ENSMUSG00000009772	Nuak2	NUAK family, SNF1-like kinase, 2
588	chr1	132321101	132321200	100	4.29435e-05	Intron (ENSMUST00000072177.13/74137, intron 1 of 7)	74137	ENSMUST00000128661.1	4936	ENSMUSG00000009772	Nuak2	NUAK family, SNF1-like kinase, 2
589	chr1	132321401	132321500	100	1.38616e-07	Intron (ENSMUST00000072177.13/74137, intron 1 of 7)	74137	ENSMUST00000128661.1	5236	ENSMUSG00000009772	Nuak2	NUAK family, SNF1-like kinase, 2
590	chr1	132321601	132321700	100	1.74653e-09	Intron (ENSMUST00000072177.13/74137, intron 1 of 7)	74137	ENSMUST00000128661.1	5436	ENSMUSG00000009772	Nuak2	NUAK family, SNF1-like kinase, 2
591	chr1	132322301	132322500	200	0.000378178	Intron (ENSMUST00000072177.13/74137, intron 1 of 7)	74137	ENSMUST00000133246.1	-5096	ENSMUSG00000009772	Nuak2	NUAK family, SNF1-like kinase, 2
592	chr1	132322601	132322800	200	0.000378178	Intron (ENSMUST00000072177.13/74137, intron 1 of 7)	74137	ENSMUST00000133246.1	-4796	ENSMUSG00000009772	Nuak2	NUAK family, SNF1-like kinase, 2
593	chr1	132323301	132323400	100	0.000188117	Intron (ENSMUST00000072177.13/74137, intron 1 of 7)	74137	ENSMUST00000133246.1	-4196	ENSMUSG00000009772	Nuak2	NUAK family, SNF1-like kinase, 2
594	chr1	132325301	132325500	200	0.000376653	Intron (ENSMUST00000072177.13/74137, intron 2 of 7)	74137	ENSMUST00000133246.1	-2096	ENSMUSG00000009772	Nuak2	NUAK family, SNF1-like kinase, 2
595	chr1	132326001	132326100	100	1.75465e-06	Intron (ENSMUST00000072177.13/74137, intron 2 of 7)	74137	ENSMUST00000133246.1	-1496	ENSMUSG00000009772	Nuak2	NUAK family, SNF1-like kinase, 2
596	chr1	132326401	132326700	300	0.000139726	Intron (ENSMUST00000072177.13/74137, intron 3 of 7)	74137	ENSMUST00000133246.1	-896	ENSMUSG00000009772	Nuak2	NUAK family, SNF1-like kinase, 2
597	chr1	132326801	132327200	400	0.000116751	Intron (ENSMUST00000072177.13/74137, intron 3 of 7)	74137	ENSMUST00000133246.1	-396	ENSMUSG00000009772	Nuak2	NUAK family, SNF1-like kinase, 2
598	chr1	132328201	132328400	200	5.36548e-06	Intron (ENSMUST00000072177.13/74137, intron 5 of 7)	74137	ENSMUST00000133246.1	605	ENSMUSG00000009772	Nuak2	NUAK family, SNF1-like kinase, 2
599	chr1	132328501	132328700	200	4.86843e-06	Intron (ENSMUST00000072177.13/74137, intron 5 of 7)	74137	ENSMUST00000133246.1	905	ENSMUSG00000009772	Nuak2	NUAK family, SNF1-like kinase, 2
600	chr1	132328801	132328900	100	4.29435e-05	Intron (ENSMUST00000072177.13/74137, intron 5 of 7)	74137	ENSMUST00000133246.1	1205	ENSMUSG00000009772	Nuak2	NUAK family, SNF1-like kinase, 2
601	chr1	132329501	132329700	200	0.000462303	Intron (ENSMUST00000072177.13/74137, intron 5 of 7)	74137	ENSMUST00000133246.1	1905	ENSMUSG00000009772	Nuak2	NUAK family, SNF1-like kinase, 2
602	chr1	132330101	132330200	100	4.24163e-09	Exon (ENSMUST00000133246.1/74137, exon 3 of 3)	74137	ENSMUST00000133246.1	2505	ENSMUSG00000009772	Nuak2	NUAK family, SNF1-like kinase, 2
603	chr1	132330401	132330500	100	0.000376653	Exon (ENSMUST00000133246.1/74137, exon 3 of 3)	74137	ENSMUST00000133246.1	2805	ENSMUSG00000009772	Nuak2	NUAK family, SNF1-like kinase, 2
604	chr1	132330701	132331100	400	0.000194246	Intron (ENSMUST00000072177.13/74137, intron 7 of 7)	74137	ENSMUST00000133246.1	3105	ENSMUSG00000009772	Nuak2	NUAK family, SNF1-like kinase, 2
605	chr1	132331301	132331500	200	3.80333e-07	Exon (ENSMUST00000072177.13/74137, exon 8 of 8)	74137	ENSMUST00000133246.1	3705	ENSMUSG00000009772	Nuak2	NUAK family, SNF1-like kinase, 2
606	chr1	132331601	132331900	300	0.000277082	Exon (ENSMUST00000072177.13/74137, exon 8 of 8)	74137	ENSMUST00000133246.1	4005	ENSMUSG00000009772	Nuak2	NUAK family, SNF1-like kinase, 2
607	chr1	132332001	132332200	200	0.00019826	Exon (ENSMUST00000072177.13/74137, exon 8 of 8)	74137	ENSMUST00000133246.1	4405	ENSMUSG00000009772	Nuak2	NUAK family, SNF1-like kinase, 2
608	chr1	132332301	132332600	300	1.69756e-05	3' UTR	74137	ENSMUST00000133246.1	4705	ENSMUSG00000009772	Nuak2	NUAK family, SNF1-like kinase, 2
609	chr1	132981201	132981300	100	0.000736488	Intron (ENSMUST00000186617.6/17248, intron 10 of 10)	17248	ENSMUST00000187529.1	22828	ENSMUSG00000054387	Mdm4	transformed mouse 3T3 cell double minute 4
610	chr1	132981901	132982100	200	0.000462303	Intron (ENSMUST00000186617.6/17248, intron 10 of 10)	17248	ENSMUST00000187529.1	22028	ENSMUSG00000054387	Mdm4	transformed mouse 3T3 cell double minute 4
611	chr1	132983301	132983400	100	3.99162e-06	Intron (ENSMUST00000186617.6/17248, intron 10 of 10)	17248	ENSMUST00000187529.1	20728	ENSMUSG00000054387	Mdm4	transformed mouse 3T3 cell double minute 4
612	chr1	132983501	132983600	100	4.78011e-11	Intron (ENSMUST00000186617.6/17248, intron 10 of 10)	17248	ENSMUST00000187529.1	20528	ENSMUSG00000054387	Mdm4	transformed mouse 3T3 cell double minute 4
613	chr1	132983701	132983800	100	4.29435e-05	Intron (ENSMUST00000186617.6/17248, intron 10 of 10)	17248	ENSMUST00000187529.1	20328	ENSMUSG00000054387	Mdm4	transformed mouse 3T3 cell double minute 4
614	chr1	132983901	132984100	200	0.000282385	Intron (ENSMUST00000186617.6/17248, intron 10 of 10)	17248	ENSMUST00000187529.1	20028	ENSMUSG00000054387	Mdm4	transformed mouse 3T3 cell double minute 4
615	chr1	132984301	132984500	200	1.03141e-05	Intron (ENSMUST00000186617.6/17248, intron 10 of 10)	17248	ENSMUST00000187529.1	19628	ENSMUSG00000054387	Mdm4	transformed mouse 3T3 cell double minute 4
616	chr1	132984601	132984800	200	9.07675e-05	Intron (ENSMUST00000186617.6/17248, intron 10 of 10)	17248	ENSMUST00000187529.1	19328	ENSMUSG00000054387	Mdm4	transformed mouse 3T3 cell double minute 4
617	chr1	132984901	132985000	100	1.02522e-08	Intron (ENSMUST00000186617.6/17248, intron 10 of 10)	17248	ENSMUST00000187529.1	19128	ENSMUSG00000054387	Mdm4	transformed mouse 3T3 cell double minute 4
618	chr1	132985401	132985600	200	6.68555e-05	Intron (ENSMUST00000186617.6/17248, intron 10 of 10)	17248	ENSMUST00000187529.1	18528	ENSMUSG00000054387	Mdm4	transformed mouse 3T3 cell double minute 4
619	chr1	132985701	132985800	100	3.99162e-06	Intron (ENSMUST00000186617.6/17248, intron 10 of 10)	17248	ENSMUST00000187529.1	18328	ENSMUSG00000054387	Mdm4	transformed mouse 3T3 cell double minute 4
620	chr1	132985901	132986000	100	0.000188117	Intron (ENSMUST00000186617.6/17248, intron 10 of 10)	17248	ENSMUST00000187529.1	18128	ENSMUSG00000054387	Mdm4	transformed mouse 3T3 cell double minute 4
621	chr1	132986201	132986400	200	8.77323e-07	3' UTR	17248	ENSMUST00000187529.1	17728	ENSMUSG00000054387	Mdm4	transformed mouse 3T3 cell double minute 4
622	chr1	132986501	132992100	5600	7.72723e-07	3' UTR	17248	ENSMUST00000187529.1	12028	ENSMUSG00000054387	Mdm4	transformed mouse 3T3 cell double minute 4
623	chr1	132992201	132992400	200	0.000188117	3' UTR	17248	ENSMUST00000187529.1	11728	ENSMUSG00000054387	Mdm4	transformed mouse 3T3 cell double minute 4
624	chr1	132992701	132993000	300	6.07652e-05	Intron (ENSMUST00000186617.6/17248, intron 10 of 10)	17248	ENSMUST00000187529.1	11128	ENSMUSG00000054387	Mdm4	transformed mouse 3T3 cell double minute 4
625	chr1	132993201	132993300	100	3.99162e-06	Intron (ENSMUST00000186617.6/17248, intron 10 of 10)	17248	ENSMUST00000187529.1	10828	ENSMUSG00000054387	Mdm4	transformed mouse 3T3 cell double minute 4
626	chr1	132993401	132993900	500	3.93162e-05	Intron (ENSMUST00000186617.6/17248, intron 10 of 10)	17248	ENSMUST00000187529.1	10228	ENSMUSG00000054387	Mdm4	transformed mouse 3T3 cell double minute 4
627	chr1	132994001	132994100	100	7.60547e-07	Intron (ENSMUST00000186617.6/17248, intron 10 of 10)	17248	ENSMUST00000187529.1	10028	ENSMUSG00000054387	Mdm4	transformed mouse 3T3 cell double minute 4
628	chr1	132994701	132994800	100	3.99162e-06	Intron (ENSMUST00000186617.6/17248, intron 9 of 10)	17248	ENSMUST00000187529.1	9328	ENSMUSG00000054387	Mdm4	transformed mouse 3T3 cell double minute 4
629	chr1	132995001	132995100	100	0.000376653	Intron (ENSMUST00000186617.6/17248, intron 9 of 10)	17248	ENSMUST00000187529.1	9028	ENSMUSG00000054387	Mdm4	transformed mouse 3T3 cell double minute 4
630	chr1	132995201	132996100	900	0.00031337	Intron (ENSMUST00000186617.6/17248, intron 9 of 10)	17248	ENSMUST00000187529.1	8028	ENSMUSG00000054387	Mdm4	transformed mouse 3T3 cell double minute 4
631	chr1	132996501	132996600	100	9.07675e-05	3' UTR	17248	ENSMUST00000187529.1	7528	ENSMUSG00000054387	Mdm4	transformed mouse 3T3 cell double minute 4
632	chr1	132996901	132997600	700	4.27255e-05	Intron (ENSMUST00000186617.6/17248, intron 8 of 10)	17248	ENSMUST00000187529.1	6528	ENSMUSG00000054387	Mdm4	transformed mouse 3T3 cell double minute 4
633	chr1	132997801	132997900	100	0.000376653	Intron (ENSMUST00000186617.6/17248, intron 8 of 10)	17248	ENSMUST00000187529.1	6228	ENSMUSG00000054387	Mdm4	transformed mouse 3T3 cell double minute 4
634	chr1	132998201	132998600	400	5.19961e-05	Intron (ENSMUST00000186617.6/17248, intron 8 of 10)	17248	ENSMUST00000187529.1	5528	ENSMUSG00000054387	Mdm4	transformed mouse 3T3 cell double minute 4
635	chr1	132999201	132999300	100	9.07675e-05	Intron (ENSMUST00000186617.6/17248, intron 8 of 10)	17248	ENSMUST00000187529.1	4828	ENSMUSG00000054387	Mdm4	transformed mouse 3T3 cell double minute 4
636	chr1	132999401	132999600	200	0.000368407	Exon (ENSMUST00000186513.1/ENSMUST00000186513.1, exon 1 of 1)	17248	ENSMUST00000187529.1	4528	ENSMUSG00000054387	Mdm4	transformed mouse 3T3 cell double minute 4
637	chr1	132999701	132999800	100	0.000376653	Exon (ENSMUST00000186513.1/ENSMUST00000186513.1, exon 1 of 1)	17248	ENSMUST00000187529.1	4328	ENSMUSG00000054387	Mdm4	transformed mouse 3T3 cell double minute 4
638	chr1	133000001	133000200	200	4.55746e-06	Exon (ENSMUST00000186513.1/ENSMUST00000186513.1, exon 1 of 1)	17248	ENSMUST00000187529.1	3928	ENSMUSG00000054387	Mdm4	transformed mouse 3T3 cell double minute 4
639	chr1	133000301	133000900	600	4.93073e-05	Exon (ENSMUST00000186513.1/ENSMUST00000186513.1, exon 1 of 1)	17248	ENSMUST00000187529.1	3228	ENSMUSG00000054387	Mdm4	transformed mouse 3T3 cell double minute 4
640	chr1	133001201	133001300	100	5.87583e-08	3' UTR	17248	ENSMUST00000187529.1	2828	ENSMUSG00000054387	Mdm4	transformed mouse 3T3 cell double minute 4
641	chr1	133001801	133002500	700	0.000247805	Intron (ENSMUST00000186617.6/17248, intron 7 of 10)	17248	ENSMUST00000187529.1	1628	ENSMUSG00000054387	Mdm4	transformed mouse 3T3 cell double minute 4
642	chr1	133003201	133003300	100	7.60547e-07	Intron (ENSMUST00000186617.6/17248, intron 7 of 10)	17248	ENSMUST00000187529.1	828	ENSMUSG00000054387	Mdm4	transformed mouse 3T3 cell double minute 4
643	chr1	133003401	133003500	100	1.18034e-10	Intron (ENSMUST00000186617.6/17248, intron 7 of 10)	17248	ENSMUST00000187529.1	628	ENSMUSG00000054387	Mdm4	transformed mouse 3T3 cell double minute 4
644	chr1	133003801	133008300	4500	9.51759e-06	Promoter	17248	ENSMUST00000189596.1	0	ENSMUSG00000054387	Mdm4	transformed mouse 3T3 cell double minute 4
645	chr1	133008501	133009100	600	1.54205e-05	Exon (ENSMUST00000185418.1/17248, exon 5 of 5)	17248	ENSMUST00000189596.1	-4176	ENSMUSG00000054387	Mdm4	transformed mouse 3T3 cell double minute 4
646	chr1	133009201	133009400	200	4.86843e-06	Intron (ENSMUST00000186617.6/17248, intron 4 of 10)	17248	ENSMUST00000189596.1	-4876	ENSMUSG00000054387	Mdm4	transformed mouse 3T3 cell double minute 4
647	chr1	133009701	133009800	100	4.29435e-05	Intron (ENSMUST00000186617.6/17248, intron 4 of 10)	17248	ENSMUST00000189596.1	-5376	ENSMUSG00000054387	Mdm4	transformed mouse 3T3 cell double minute 4
648	chr1	133010401	133010600	200	0.000413628	Intron (ENSMUST00000186617.6/17248, intron 4 of 10)	17248	ENSMUST00000189596.1	-6076	ENSMUSG00000054387	Mdm4	transformed mouse 3T3 cell double minute 4
649	chr1	133010701	133010900	200	1.2576e-06	Intron (ENSMUST00000186617.6/17248, intron 4 of 10)	17248	ENSMUST00000189596.1	-6376	ENSMUSG00000054387	Mdm4	transformed mouse 3T3 cell double minute 4
650	chr1	133011201	133011400	200	0.000368274	Intron (ENSMUST00000186617.6/17248, intron 3 of 10)	17248	ENSMUST00000189596.1	-6876	ENSMUSG00000054387	Mdm4	transformed mouse 3T3 cell double minute 4
651	chr1	133011901	133012000	100	1.75465e-06	Intron (ENSMUST00000186617.6/17248, intron 3 of 10)	17248	ENSMUST00000190312.6	6858	ENSMUSG00000054387	Mdm4	transformed mouse 3T3 cell double minute 4
652	chr1	133012301	133012500	200	0.000389716	Intron (ENSMUST00000186617.6/17248, intron 3 of 10)	17248	ENSMUST00000190312.6	6358	ENSMUSG00000054387	Mdm4	transformed mouse 3T3 cell double minute 4
653	chr1	133013101	133013500	400	0.000199063	Intron (ENSMUST00000186617.6/17248, intron 2 of 10)	17248	ENSMUST00000190312.6	5358	ENSMUSG00000054387	Mdm4	transformed mouse 3T3 cell double minute 4
654	chr1	133013601	133013700	100	1.98676e-05	Intron (ENSMUST00000186617.6/17248, intron 2 of 10)	17248	ENSMUST00000190312.6	5158	ENSMUSG00000054387	Mdm4	transformed mouse 3T3 cell double minute 4
655	chr1	133013801	133014600	800	6.85259e-06	Intron (ENSMUST00000186617.6/17248, intron 2 of 10)	17248	ENSMUST00000190312.6	4258	ENSMUSG00000054387	Mdm4	transformed mouse 3T3 cell double minute 4
656	chr1	133014701	133014900	200	4.98719e-05	Intron (ENSMUST00000186617.6/17248, intron 2 of 10)	17248	ENSMUST00000190312.6	3958	ENSMUSG00000054387	Mdm4	transformed mouse 3T3 cell double minute 4
657	chr1	133015301	133015600	300	0.000155807	Intron (ENSMUST00000186617.6/17248, intron 2 of 10)	17248	ENSMUST00000190312.6	3258	ENSMUSG00000054387	Mdm4	transformed mouse 3T3 cell double minute 4
658	chr1	133015801	133016000	200	9.40878e-05	Intron (ENSMUST00000186617.6/17248, intron 2 of 10)	17248	ENSMUST00000190312.6	2858	ENSMUSG00000054387	Mdm4	transformed mouse 3T3 cell double minute 4
659	chr1	133016301	133016400	100	1.18034e-10	Intron (ENSMUST00000186617.6/17248, intron 2 of 10)	17248	ENSMUST00000190312.6	2458	ENSMUSG00000054387	Mdm4	transformed mouse 3T3 cell double minute 4
660	chr1	133016501	133016700	200	8.16397e-08	Intron (ENSMUST00000186617.6/17248, intron 2 of 10)	17248	ENSMUST00000190312.6	2158	ENSMUSG00000054387	Mdm4	transformed mouse 3T3 cell double minute 4
661	chr1	133016801	133017000	200	1.19296e-05	Intron (ENSMUST00000186617.6/17248, intron 2 of 10)	17248	ENSMUST00000190312.6	1858	ENSMUSG00000054387	Mdm4	transformed mouse 3T3 cell double minute 4
662	chr1	133017201	133017600	400	0.000100128	Intron (ENSMUST00000186617.6/17248, intron 2 of 10)	17248	ENSMUST00000190312.6	1258	ENSMUSG00000054387	Mdm4	transformed mouse 3T3 cell double minute 4
663	chr1	133017701	133018000	300	0.000385362	Exon (ENSMUST00000186645.1/17248, exon 2 of 2)	17248	ENSMUST00000190312.6	858	ENSMUSG00000054387	Mdm4	transformed mouse 3T3 cell double minute 4
664	chr1	133018101	133018600	500	0.000131108	Exon (ENSMUST00000186645.1/17248, exon 2 of 2)	17248	ENSMUST00000190312.6	258	ENSMUSG00000054387	Mdm4	transformed mouse 3T3 cell double minute 4
665	chr1	133018901	133019900	1000	5.68763e-05	5' UTR	17248	ENSMUST00000190312.6	-43	ENSMUSG00000054387	Mdm4	transformed mouse 3T3 cell double minute 4
666	chr1	133620201	133620300	100	0.000736488	3' UTR	70579	ENSMUST00000191828.1	6932	ENSMUSG00000102976	Zc3h11a	zinc finger CCCH type containing 11A
667	chr1	133624501	133624600	100	9.07675e-05	3' UTR	70579	ENSMUST00000191828.1	2632	ENSMUSG00000102976	Zc3h11a	zinc finger CCCH type containing 11A
668	chr1	133626801	133626900	100	0.000188117	3' UTR	70579	ENSMUST00000191828.1	332	ENSMUSG00000102976	Zc3h11a	zinc finger CCCH type containing 11A
669	chr1	133654101	133654200	100	0.000736488	5' UTR	667118	ENSMUST00000190574.1	6685	ENSMUSG00000094410	Zbed6	zinc finger, BED type containing 6
670	chr1	133654701	133654800	100	0.000736488	Exon (ENSMUST00000192775.1/70579, exon 2 of 2)	667118	ENSMUST00000190574.1	6085	ENSMUSG00000094410	Zbed6	zinc finger, BED type containing 6
671	chr1	133655301	133655600	300	0.000261141	5' UTR	667118	ENSMUST00000190574.1	5285	ENSMUSG00000094410	Zbed6	zinc finger, BED type containing 6
672	chr1	133655701	133655800	100	0.000188117	3' UTR	667118	ENSMUST00000190574.1	5085	ENSMUSG00000094410	Zbed6	zinc finger, BED type containing 6
673	chr1	133656201	133656400	200	4.09653e-07	3' UTR	667118	ENSMUST00000190574.1	4485	ENSMUSG00000094410	Zbed6	zinc finger, BED type containing 6
674	chr1	133656601	133656700	100	1.98676e-05	3' UTR	667118	ENSMUST00000190574.1	4185	ENSMUSG00000094410	Zbed6	zinc finger, BED type containing 6
675	chr1	133656801	133657000	200	4.50049e-06	Exon (ENSMUST00000179598.3/70579, exon 1 of 17)	667118	ENSMUST00000190574.1	3885	ENSMUSG00000094410	Zbed6	zinc finger, BED type containing 6
676	chr1	133657101	133657200	100	0.000376653	Exon (ENSMUST00000179598.3/70579, exon 1 of 17)	667118	ENSMUST00000190574.1	3685	ENSMUSG00000094410	Zbed6	zinc finger, BED type containing 6
677	chr1	133657301	133657500	200	6.48397e-06	5' UTR	667118	ENSMUST00000190574.1	3385	ENSMUSG00000094410	Zbed6	zinc finger, BED type containing 6
678	chr1	133657601	133657800	200	9.40707e-05	Exon (ENSMUST00000179598.3/70579, exon 1 of 17)	667118	ENSMUST00000190574.1	3085	ENSMUSG00000094410	Zbed6	zinc finger, BED type containing 6
679	chr1	133657901	133658500	600	0.000153813	Exon (ENSMUST00000179598.3/70579, exon 1 of 17)	667118	ENSMUST00000190574.1	2385	ENSMUSG00000094410	Zbed6	zinc finger, BED type containing 6
680	chr1	133658701	133658900	200	1.63468e-07	Exon (ENSMUST00000179598.3/70579, exon 1 of 17)	667118	ENSMUST00000190574.1	1985	ENSMUSG00000094410	Zbed6	zinc finger, BED type containing 6
681	chr1	133659001	133659500	500	0.000223429	Exon (ENSMUST00000179598.3/70579, exon 1 of 17)	667118	ENSMUST00000190574.1	1385	ENSMUSG00000094410	Zbed6	zinc finger, BED type containing 6
682	chr1	133659701	133659900	200	0.000413628	5' UTR	667118	ENSMUST00000190574.1	985	ENSMUSG00000094410	Zbed6	zinc finger, BED type containing 6
683	chr1	133660001	133660100	100	1.98676e-05	5' UTR	667118	ENSMUST00000190574.1	785	ENSMUSG00000094410	Zbed6	zinc finger, BED type containing 6
684	chr1	133660401	133660800	400	5.92016e-05	5' UTR	667118	ENSMUST00000190574.1	85	ENSMUSG00000094410	Zbed6	zinc finger, BED type containing 6
685	chr1	133660901	133661000	100	0.000736488	5' UTR	667118	ENSMUST00000190574.1	-16	ENSMUSG00000094410	Zbed6	zinc finger, BED type containing 6
686	chr1	134518201	134518300	100	0.000376653	Exon (ENSMUST00000179718.1/ENSMUST00000179718.1, exon 1 of 1)	98710	ENSMUST00000047978.8	23553	ENSMUSG00000042229	Rabif	RAB interacting factor
687	chr1	134560201	134560300	100	0.000736488	Promoter	75605	ENSMUST00000112197.2	0	ENSMUSG00000042207	Kdm5b	lysine (K)-specific demethylase 5B
688	chr1	134609101	134609200	100	0.000736488	Intron (ENSMUST00000047714.13/75605, intron 14 of 26)	75605	ENSMUST00000133725.1	-12680	ENSMUSG00000042207	Kdm5b	lysine (K)-specific demethylase 5B
689	chr1	134624701	134624800	100	0.000736488	Exon (ENSMUST00000047714.13/75605, exon 23 of 27)	75605	ENSMUST00000133725.1	2821	ENSMUSG00000042207	Kdm5b	lysine (K)-specific demethylase 5B
690	chr1	134827001	134827100	100	0.000736488	Exon (ENSMUST00000194520.1/ENSMUST00000194520.1, exon 1 of 1)	329251	ENSMUST00000146639.1	8720	ENSMUSG00000073557	Ppp1r12b	protein phosphatase 1, regulatory subunit 12B
691	chr1	135148401	135148500	100	0.000376653	Intron (ENSMUST00000027684.10/68724, intron 1 of 6)	68724	ENSMUST00000125774.1	732	ENSMUSG00000026426	Arl8a	ADP-ribosylation factor-like 8A
692	chr1	135151201	135151300	100	0.000736488	Intron (ENSMUST00000027684.10/68724, intron 1 of 6)	68724	ENSMUST00000123344.1	-782	ENSMUSG00000026426	Arl8a	ADP-ribosylation factor-like 8A
693	chr1	135232001	135232100	100	0.000376653	Exon (ENSMUST00000110798.4/ENSMUST00000110798.4, exon 1 of 1)	13710	ENSMUST00000188895.1	25549	ENSMUSG00000003051	Elf3	E74-like factor 3
694	chr1	135393701	135393800	100	0.000376653	Intron (ENSMUST00000041023.13/226432, intron 15 of 23)	226432	ENSMUST00000159089.1	-3908	ENSMUSG00000041879	Ipo9	importin 9
695	chr1	135766201	135766300	100	9.07675e-05	5' UTR	27280	ENSMUST00000038945.5	82	ENSMUSG00000041801	Phlda3	pleckstrin homology like domain, family A, member 3
696	chr1	137898801	137898900	100	9.07675e-05	Exon (ENSMUST00000187561.1/ENSMUST00000187561.1, exon 1 of 1)	735252	ENSMUST00000083631.1	-67555	ENSMUSG00000065565	Mir181a-1	microRNA 181a-1
697	chr1	137931401	137931500	100	0.000736488	Intron (ENSMUST00000182127.1/ENSMUST00000182127.1, intron 2 of 2)	735252	ENSMUST00000083631.1	-34955	ENSMUSG00000065565	Mir181a-1	microRNA 181a-1
698	chr1	137952601	137952700	100	0.000376653	Exon (ENSMUST00000194483.1/ENSMUST00000194483.1, exon 1 of 1)	735252	ENSMUST00000083631.1	-13755	ENSMUSG00000065565	Mir181a-1	microRNA 181a-1
699	chr1	138499501	138499600	100	0.000376653	Intron (ENSMUST00000186017.6/59125, intron 8 of 9)	59125	ENSMUST00000027642.4	120074	ENSMUSG00000026393	Nek7	NIMA (never in mitosis gene a)-related expressed kinase 7
700	chr1	138590401	138590500	100	0.000736488	Intron (ENSMUST00000186017.6/59125, intron 1 of 9)	59125	ENSMUST00000027642.4	29174	ENSMUSG00000026393	Nek7	NIMA (never in mitosis gene a)-related expressed kinase 7
701	chr1	138618001	138618100	100	4.29435e-05	Intron (ENSMUST00000186017.6/59125, intron 1 of 9)	59125	ENSMUST00000027642.4	1574	ENSMUSG00000026393	Nek7	NIMA (never in mitosis gene a)-related expressed kinase 7
702	chr1	143623701	143623800	100	0.000376653	Intron (ENSMUST00000018337.8/214498, intron 13 of 16)	214498	ENSMUST00000162638.1	16781	ENSMUSG00000026361	Cdc73	cell division cycle 73, Paf1/RNA polymerase II complex component
703	chr1	143683501	143683600	100	9.07675e-05	Exon (ENSMUST00000161973.1/ENSMUST00000161973.1, exon 1 of 1)	214498	ENSMUST00000159794.1	18600	ENSMUSG00000026361	Cdc73	cell division cycle 73, Paf1/RNA polymerase II complex component
704	chr1	150265001	150265100	100	0.000376653	Distal Intergenic	20028	ENSMUST00000165062.7	-54317	ENSMUSG00000006007	Pdc	phosducin
705	chr1	151882901	151883000	100	0.000188117	Intron (ENSMUST00000187716.1/ENSMUST00000187716.1, intron 1 of 1)	69399	ENSMUST00000128433.7	38227	ENSMUSG00000032666	1700025G04Rik	RIKEN cDNA 1700025G04 gene
706	chr1	151885701	151885800	100	0.000376653	3' UTR	69399	ENSMUST00000128433.7	35427	ENSMUSG00000032666	1700025G04Rik	RIKEN cDNA 1700025G04 gene
707	chr1	151890001	151890100	100	0.000736488	3' UTR	69399	ENSMUST00000128433.7	31127	ENSMUSG00000032666	1700025G04Rik	RIKEN cDNA 1700025G04 gene
708	chr1	151890201	151890400	200	0.000188707	3' UTR	69399	ENSMUST00000128433.7	30827	ENSMUSG00000032666	1700025G04Rik	RIKEN cDNA 1700025G04 gene
709	chr1	151891001	151891100	100	0.000188117	3' UTR	69399	ENSMUST00000128433.7	30127	ENSMUSG00000032666	1700025G04Rik	RIKEN cDNA 1700025G04 gene
710	chr1	151891401	151891500	100	0.000188117	3' UTR	69399	ENSMUST00000128433.7	29727	ENSMUSG00000032666	1700025G04Rik	RIKEN cDNA 1700025G04 gene
711	chr1	151892601	151892800	200	0.00023371	3' UTR	69399	ENSMUST00000128433.7	28427	ENSMUSG00000032666	1700025G04Rik	RIKEN cDNA 1700025G04 gene
712	chr1	151906701	151906800	100	0.000188117	Intron (ENSMUST00000187603.6/69399, intron 5 of 6)	69399	ENSMUST00000128433.7	14427	ENSMUSG00000032666	1700025G04Rik	RIKEN cDNA 1700025G04 gene
713	chr1	151907001	151907100	100	0.000376653	Intron (ENSMUST00000187603.6/69399, intron 5 of 6)	69399	ENSMUST00000128433.7	14127	ENSMUSG00000032666	1700025G04Rik	RIKEN cDNA 1700025G04 gene
714	chr1	151966201	151966300	100	0.000376653	Intron (ENSMUST00000187603.6/69399, intron 3 of 6)	69399	ENSMUST00000128433.7	-44974	ENSMUSG00000032666	1700025G04Rik	RIKEN cDNA 1700025G04 gene
715	chr1	151967701	151967800	100	0.000736488	Intron (ENSMUST00000187603.6/69399, intron 3 of 6)	69399	ENSMUST00000128433.7	-46474	ENSMUSG00000032666	1700025G04Rik	RIKEN cDNA 1700025G04 gene
716	chr1	152006501	152006600	100	0.000376653	Exon (ENSMUST00000187603.6/69399, exon 2 of 7)	69399	ENSMUST00000121533.2	48692	ENSMUSG00000032666	1700025G04Rik	RIKEN cDNA 1700025G04 gene
717	chr1	152062401	152062500	100	9.07675e-05	Intron (ENSMUST00000187603.6/69399, intron 1 of 6)	69399	ENSMUST00000121533.2	-7109	ENSMUSG00000032666	1700025G04Rik	RIKEN cDNA 1700025G04 gene
718	chr1	152071301	152071400	100	1.98676e-05	Intron (ENSMUST00000187603.6/69399, intron 1 of 6)	69399	ENSMUST00000121533.2	-16009	ENSMUSG00000032666	1700025G04Rik	RIKEN cDNA 1700025G04 gene
719	chr1	152077601	152077700	100	0.000376653	Intron (ENSMUST00000187603.6/69399, intron 1 of 6)	69399	ENSMUST00000187603.6	12270	ENSMUSG00000032666	1700025G04Rik	RIKEN cDNA 1700025G04 gene
720	chr1	152078201	152078300	100	0.000736488	Intron (ENSMUST00000187603.6/69399, intron 1 of 6)	69399	ENSMUST00000187603.6	11670	ENSMUSG00000032666	1700025G04Rik	RIKEN cDNA 1700025G04 gene
721	chr1	152083201	152083300	100	0.000376653	Intron (ENSMUST00000187603.6/69399, intron 1 of 6)	69399	ENSMUST00000187603.6	6670	ENSMUSG00000032666	1700025G04Rik	RIKEN cDNA 1700025G04 gene
722	chr1	152088901	152089000	100	0.000736488	Intron (ENSMUST00000187603.6/69399, intron 1 of 6)	69399	ENSMUST00000187603.6	970	ENSMUSG00000032666	1700025G04Rik	RIKEN cDNA 1700025G04 gene
723	chr1	152766601	152766700	100	0.000188117	5' UTR	67771	ENSMUST00000097536.5	59	ENSMUSG00000008475	Arpc5	actin related protein 2/3 complex, subunit 5
724	chr1	152774601	152774700	100	0.000736488	3' UTR	67771	ENSMUST00000143008.1	6102	ENSMUSG00000008475	Arpc5	actin related protein 2/3 complex, subunit 5
725	chr1	152837601	152837700	100	0.000376653	3' UTR	226517	ENSMUST00000188937.1	11220	ENSMUSG00000042772	Smg7	Smg-7 homolog, nonsense mediated mRNA decay factor (C. elegans)
726	chr1	152845201	152845300	100	9.07675e-05	Exon (ENSMUST00000073441.12/226517, exon 16 of 22)	226517	ENSMUST00000188937.1	3620	ENSMUSG00000042772	Smg7	Smg-7 homolog, nonsense mediated mRNA decay factor (C. elegans)
727	chr1	152848701	152848800	100	0.000736488	Exon (ENSMUST00000073441.12/226517, exon 14 of 22)	226517	ENSMUST00000188937.1	120	ENSMUSG00000042772	Smg7	Smg-7 homolog, nonsense mediated mRNA decay factor (C. elegans)
728	chr1	152899201	152899300	100	0.000376653	Intron (ENSMUST00000073441.12/226517, intron 1 of 21)	226517	ENSMUST00000073441.12	3322	ENSMUSG00000042772	Smg7	Smg-7 homolog, nonsense mediated mRNA decay factor (C. elegans)
729	chr1	153219601	153219700	100	0.000376653	3' UTR	226519	ENSMUST00000161744.1	9444	ENSMUSG00000026478	Lamc1	laminin, gamma 1
730	chr1	153220701	153220800	100	9.07675e-05	3' UTR	226519	ENSMUST00000161744.1	8344	ENSMUSG00000026478	Lamc1	laminin, gamma 1
731	chr1	153332201	153332300	100	0.000376653	Exon (ENSMUST00000027752.14/226519, exon 1 of 28)	226519	ENSMUST00000027752.14	486	ENSMUSG00000026478	Lamc1	laminin, gamma 1
732	chr1	153899901	153900100	200	0.000413628	Promoter	102466257	ENSMUST00000183582.1	0	ENSMUSG00000099227	Mir8114	microRNA 8114
733	chr1	153900701	153900800	100	0.000376653	5' UTR	14645	ENSMUST00000139476.7	95	ENSMUSG00000026473	Glul	glutamate-ammonia ligase (glutamine synthetase)
734	chr1	153900901	153901100	200	2.34676e-05	5' UTR	14645	ENSMUST00000139476.7	295	ENSMUSG00000026473	Glul	glutamate-ammonia ligase (glutamine synthetase)
735	chr1	153901701	153901800	100	0.000736488	Intron (ENSMUST00000086199.11/14645, intron 1 of 6)	14645	ENSMUST00000139476.7	1095	ENSMUSG00000026473	Glul	glutamate-ammonia ligase (glutamine synthetase)
736	chr1	153902001	153902300	300	0.000311194	Intron (ENSMUST00000086199.11/14645, intron 1 of 6)	14645	ENSMUST00000139476.7	1395	ENSMUSG00000026473	Glul	glutamate-ammonia ligase (glutamine synthetase)
737	chr1	153902901	153903100	200	4.62611e-05	5' UTR	14645	ENSMUST00000153134.2	-698	ENSMUSG00000026473	Glul	glutamate-ammonia ligase (glutamine synthetase)
738	chr1	153903201	153903600	400	3.0093e-05	Intron (ENSMUST00000086199.11/14645, intron 2 of 6)	14645	ENSMUST00000153134.2	-198	ENSMUSG00000026473	Glul	glutamate-ammonia ligase (glutamine synthetase)
739	chr1	153903901	153904100	200	0.000376653	Exon (ENSMUST00000153134.2/14645, exon 1 of 4)	14645	ENSMUST00000153134.2	103	ENSMUSG00000026473	Glul	glutamate-ammonia ligase (glutamine synthetase)
740	chr1	153904201	153904300	100	0.000376653	Intron (ENSMUST00000086199.11/14645, intron 2 of 6)	14645	ENSMUST00000153134.2	403	ENSMUSG00000026473	Glul	glutamate-ammonia ligase (glutamine synthetase)
741	chr1	153904501	153904600	100	0.000376653	Exon (ENSMUST00000086199.11/14645, exon 3 of 7)	14645	ENSMUST00000153134.2	703	ENSMUSG00000026473	Glul	glutamate-ammonia ligase (glutamine synthetase)
742	chr1	153905001	153905300	300	3.15898e-05	Intron (ENSMUST00000086199.11/14645, intron 3 of 6)	14645	ENSMUST00000154576.1	-743	ENSMUSG00000026473	Glul	glutamate-ammonia ligase (glutamine synthetase)
743	chr1	153905401	153905500	100	4.29435e-05	Intron (ENSMUST00000086199.11/14645, intron 3 of 6)	14645	ENSMUST00000154576.1	-543	ENSMUSG00000026473	Glul	glutamate-ammonia ligase (glutamine synthetase)
744	chr1	153905801	153906000	200	0.000188331	Intron (ENSMUST00000086199.11/14645, intron 3 of 6)	14645	ENSMUST00000154576.1	-43	ENSMUSG00000026473	Glul	glutamate-ammonia ligase (glutamine synthetase)
745	chr1	153906501	153906700	200	3.58011e-10	Intron (ENSMUST00000086199.11/14645, intron 4 of 6)	14645	ENSMUST00000154576.1	458	ENSMUSG00000026473	Glul	glutamate-ammonia ligase (glutamine synthetase)
746	chr1	153907101	153907400	300	0.000245605	Exon (ENSMUST00000086199.11/14645, exon 5 of 7)	14645	ENSMUST00000154576.1	1058	ENSMUSG00000026473	Glul	glutamate-ammonia ligase (glutamine synthetase)
747	chr1	153907501	153907600	100	8.97631e-06	Intron (ENSMUST00000086199.11/14645, intron 6 of 6)	14645	ENSMUST00000154576.1	1458	ENSMUSG00000026473	Glul	glutamate-ammonia ligase (glutamine synthetase)
748	chr1	153907801	153908100	300	8.22141e-09	Exon (ENSMUST00000086199.11/14645, exon 7 of 7)	14645	ENSMUST00000154576.1	1758	ENSMUSG00000026473	Glul	glutamate-ammonia ligase (glutamine synthetase)
749	chr1	153908401	153909000	600	0.000124244	3' UTR	14645	ENSMUST00000154576.1	2358	ENSMUSG00000026473	Glul	glutamate-ammonia ligase (glutamine synthetase)
750	chr1	153909201	153909300	100	9.76495e-15	3' UTR	14645	ENSMUST00000154576.1	3158	ENSMUSG00000026473	Glul	glutamate-ammonia ligase (glutamine synthetase)
751	chr1	153909401	153909500	100	0.000188117	3' UTR	14645	ENSMUST00000154576.1	3358	ENSMUSG00000026473	Glul	glutamate-ammonia ligase (glutamine synthetase)
752	chr1	155279801	155279900	100	0.000376653	3' UTR	19775	ENSMUST00000139925.1	29742	ENSMUSG00000026469	Xpr1	xenotropic and polytropic retrovirus receptor 1
753	chr1	155863101	155863200	100	0.000736488	Exon (ENSMUST00000138762.7/74081, exon 34 of 38)	74081	ENSMUST00000132189.1	-1728	ENSMUSG00000033671	Cep350	centrosomal protein 350
754	chr1	156042601	156042700	100	0.000736488	Intron (ENSMUST00000111757.9/240832, intron 2 of 6)	240832	ENSMUST00000097526.2	1684	ENSMUSG00000050565	Tor1aip2	torsin A interacting protein 2
755	chr1	156051301	156051400	100	3.26219e-07	5' UTR	240832	ENSMUST00000097526.2	10384	ENSMUSG00000050565	Tor1aip2	torsin A interacting protein 2
756	chr1	156052401	156052500	100	0.000736488	3' UTR	240832	ENSMUST00000125371.1	-10713	ENSMUSG00000050565	Tor1aip2	torsin A interacting protein 2
757	chr1	156061601	156061700	100	0.000736488	Exon (ENSMUST00000111757.9/240832, exon 5 of 7)	240832	ENSMUST00000125371.1	-1513	ENSMUSG00000050565	Tor1aip2	torsin A interacting protein 2
758	chr1	156066601	156066700	100	0.000736488	3' UTR	240832	ENSMUST00000125371.1	3388	ENSMUSG00000050565	Tor1aip2	torsin A interacting protein 2
759	chr1	156366001	156366100	100	0.000376653	5' UTR	77352	ENSMUST00000179572.1	10392	ENSMUSG00000026601	Axdnd1	axonemal dynein light chain domain containing 1
760	chr1	156366201	156366300	100	7.60547e-07	Exon (ENSMUST00000102782.3/ENSMUST00000102782.3, exon 1 of 1)	77352	ENSMUST00000179572.1	10192	ENSMUSG00000026601	Axdnd1	axonemal dynein light chain domain containing 1
761	chr1	156524001	156524100	100	0.000376653	Exon (ENSMUST00000190422.2/ENSMUST00000190422.2, exon 1 of 1)	11352	ENSMUST00000173929.7	-34686	ENSMUSG00000026596	Abl2	v-abl Abelson murine leukemia viral oncogene 2 (arg, Abelson-related gene)
762	chr1	156524301	156524400	100	0.000188117	Exon (ENSMUST00000190422.2/ENSMUST00000190422.2, exon 1 of 1)	11352	ENSMUST00000173929.7	-34386	ENSMUSG00000026596	Abl2	v-abl Abelson murine leukemia viral oncogene 2 (arg, Abelson-related gene)
763	chr1	156524501	156524700	200	9.85465e-05	Exon (ENSMUST00000190422.2/ENSMUST00000190422.2, exon 1 of 1)	11352	ENSMUST00000173929.7	-34086	ENSMUSG00000026596	Abl2	v-abl Abelson murine leukemia viral oncogene 2 (arg, Abelson-related gene)
764	chr1	156526101	156526200	100	9.07675e-05	Exon (ENSMUST00000190422.2/ENSMUST00000190422.2, exon 1 of 1)	11352	ENSMUST00000173929.7	-32586	ENSMUSG00000026596	Abl2	v-abl Abelson murine leukemia viral oncogene 2 (arg, Abelson-related gene)
765	chr1	156642901	156643000	100	9.07675e-05	3' UTR	30935	ENSMUST00000154353.1	15458	ENSMUSG00000060519	Tor3a	torsin family 3, member A
766	chr1	156808801	156808900	100	0.000736488	3' UTR	78255	ENSMUST00000189208.1	4668	ENSMUSG00000026594	Ralgps2	Ral GEF with PH domain and SH3 binding motif 2
767	chr1	160906401	160906500	100	0.000376653	Promoter	381305	ENSMUST00000161609.7	0	ENSMUSG00000040423	Rc3h1	RING CCCH (C3H) domains 1
768	chr1	161036201	161036300	100	0.000188117	Exon (ENSMUST00000160152.7/14455, exon 4 of 7)	14455	ENSMUST00000160497.1	181	ENSMUSG00000053332	Gas5	growth arrest specific 5
769	chr1	161036801	161036900	100	9.07675e-05	Exon (ENSMUST00000160152.7/14455, exon 6 of 7)	14455	ENSMUST00000161623.7	106	ENSMUSG00000053332	Gas5	growth arrest specific 5
770	chr1	161241001	161241700	700	0.000109215	3' UTR	11758	ENSMUST00000139387.7	8854	ENSMUSG00000026701	Prdx6	peroxiredoxin 6
771	chr1	161248601	161248700	100	0.000736488	Exon (ENSMUST00000194613.1/ENSMUST00000194613.1, exon 1 of 1)	11758	ENSMUST00000139387.7	1854	ENSMUSG00000026701	Prdx6	peroxiredoxin 6
772	chr1	162672501	162672600	100	8.97631e-06	3' UTR	100038657	ENSMUST00000169439.2	-14282	ENSMUSG00000091060	Myocos	myocilin opposite strand
773	chr1	162672901	162673100	200	0.00023371	3' UTR	100038657	ENSMUST00000169439.2	-14682	ENSMUSG00000091060	Myocos	myocilin opposite strand
774	chr1	162673301	162673500	200	0.000188328	3' UTR	226562	ENSMUST00000182535.1	14689	ENSMUSG00000040225	Prrc2c	proline-rich coiled-coil 2C
775	chr1	162673701	162673800	100	1.02522e-08	Intron (ENSMUST00000182149.7/226562, intron 34 of 34)	226562	ENSMUST00000182535.1	14389	ENSMUSG00000040225	Prrc2c	proline-rich coiled-coil 2C
776	chr1	162678001	162678100	100	0.000376653	Exon (ENSMUST00000182149.7/226562, exon 31 of 35)	226562	ENSMUST00000182535.1	10089	ENSMUSG00000040225	Prrc2c	proline-rich coiled-coil 2C
777	chr1	162692501	162692600	100	9.07675e-05	Exon (ENSMUST00000182149.7/226562, exon 22 of 35)	226562	ENSMUST00000182535.1	-4312	ENSMUSG00000040225	Prrc2c	proline-rich coiled-coil 2C
778	chr1	162698001	162698100	100	0.000188117	Exon (ENSMUST00000182149.7/226562, exon 19 of 35)	226562	ENSMUST00000183223.7	6666	ENSMUSG00000040225	Prrc2c	proline-rich coiled-coil 2C
779	chr1	162705101	162705200	100	0.000736488	Promoter	226562	ENSMUST00000182393.7	0	ENSMUSG00000040225	Prrc2c	proline-rich coiled-coil 2C
780	chr1	162705301	162705500	200	0.00037024	Exon (ENSMUST00000182149.7/226562, exon 16 of 35)	226562	ENSMUST00000182393.7	-109	ENSMUSG00000040225	Prrc2c	proline-rich coiled-coil 2C
781	chr1	162705701	162706000	300	0.000265416	Exon (ENSMUST00000182149.7/226562, exon 16 of 35)	226562	ENSMUST00000182393.7	-509	ENSMUSG00000040225	Prrc2c	proline-rich coiled-coil 2C
782	chr1	162706301	162706400	100	0.000188117	Exon (ENSMUST00000182149.7/226562, exon 16 of 35)	226562	ENSMUST00000182393.7	-1109	ENSMUSG00000040225	Prrc2c	proline-rich coiled-coil 2C
783	chr1	162708901	162709000	100	4.24163e-09	Exon (ENSMUST00000182149.7/226562, exon 14 of 35)	226562	ENSMUST00000182393.7	-3709	ENSMUSG00000040225	Prrc2c	proline-rich coiled-coil 2C
784	chr1	162710401	162710500	100	0.000376653	Exon (ENSMUST00000182149.7/226562, exon 12 of 35)	226562	ENSMUST00000182393.7	-5209	ENSMUSG00000040225	Prrc2c	proline-rich coiled-coil 2C
785	chr1	162710601	162710700	100	0.000736488	Exon (ENSMUST00000182149.7/226562, exon 12 of 35)	226562	ENSMUST00000182393.7	-5409	ENSMUSG00000040225	Prrc2c	proline-rich coiled-coil 2C
786	chr1	162718601	162718700	100	0.000736488	Exon (ENSMUST00000182149.7/226562, exon 6 of 35)	226562	ENSMUST00000182308.1	6168	ENSMUSG00000040225	Prrc2c	proline-rich coiled-coil 2C
787	chr1	164224601	164224700	100	1.02522e-08	Distal Intergenic	116914	ENSMUST00000044021.11	-24346	ENSMUSG00000040918	Slc19a2	solute carrier family 19 (thiamine transporter), member 2
788	chr1	164227101	164227200	100	1.98676e-05	Distal Intergenic	116914	ENSMUST00000044021.11	-21846	ENSMUSG00000040918	Slc19a2	solute carrier family 19 (thiamine transporter), member 2
789	chr1	164437401	164437500	100	9.07675e-05	3' UTR	11931	ENSMUST00000193980.1	6219	ENSMUSG00000026576	Atp1b1	ATPase, Na+/K+ transporting, beta 1 polypeptide
790	chr1	164437701	164437800	100	0.000376653	3' UTR	11931	ENSMUST00000193980.1	5919	ENSMUSG00000026576	Atp1b1	ATPase, Na+/K+ transporting, beta 1 polypeptide
791	chr1	164437901	164438000	100	8.97631e-06	3' UTR	11931	ENSMUST00000193980.1	5719	ENSMUSG00000026576	Atp1b1	ATPase, Na+/K+ transporting, beta 1 polypeptide
792	chr1	164438301	164438400	100	1.98676e-05	Exon (ENSMUST00000027863.12/11931, exon 6 of 6)	11931	ENSMUST00000193980.1	5319	ENSMUSG00000026576	Atp1b1	ATPase, Na+/K+ transporting, beta 1 polypeptide
793	chr1	164448401	164448500	100	0.000736488	Intron (ENSMUST00000027863.12/11931, intron 2 of 5)	11931	ENSMUST00000193980.1	-4682	ENSMUSG00000026576	Atp1b1	ATPase, Na+/K+ transporting, beta 1 polypeptide
794	chr1	164457701	164457800	100	0.000736488	Exon (ENSMUST00000027863.12/11931, exon 1 of 6)	11931	ENSMUST00000192522.1	222	ENSMUSG00000026576	Atp1b1	ATPase, Na+/K+ transporting, beta 1 polypeptide
795	chr1	165178201	165178300	100	9.07675e-05	3' UTR	108735	ENSMUST00000192565.1	16017	ENSMUSG00000040848	Sft2d2	SFT2 domain containing 2
796	chr1	165338801	165338900	100	0.000188117	Exon (ENSMUST00000193353.1/74106, exon 4 of 7)	74106	ENSMUST00000193353.1	13098	ENSMUSG00000026571	Dcaf6	DDB1 and CUL4 associated factor 6
797	chr1	165350901	165351000	100	1.98676e-05	Exon (ENSMUST00000027856.12/74106, exon 14 of 19)	74106	ENSMUST00000193353.1	998	ENSMUSG00000026571	Dcaf6	DDB1 and CUL4 associated factor 6
798	chr1	165388601	165388700	100	9.07675e-05	Exon (ENSMUST00000027856.12/74106, exon 10 of 19)	74106	ENSMUST00000194869.5	46	ENSMUSG00000026571	Dcaf6	DDB1 and CUL4 associated factor 6
799	chr1	165445801	165445900	100	0.000376653	Intron (ENSMUST00000027856.12/74106, intron 1 of 18)	74106	ENSMUST00000027856.12	14565	ENSMUSG00000026571	Dcaf6	DDB1 and CUL4 associated factor 6
800	chr1	165461201	165461300	100	9.07675e-05	Promoter	70456	ENSMUST00000128633.1	0	ENSMUSG00000026568	Mpc2	mitochondrial pyruvate carrier 2
801	chr1	165774301	165774400	100	0.000188117	3' UTR	433375	ENSMUST00000040298.4	4825	ENSMUSG00000040713	Creg1	cellular repressor of E1A-stimulated genes 1
802	chr1	167340201	167340500	300	5.23872e-15	Exon (ENSMUST00000157621.1/ENSMUST00000157621.1, exon 1 of 1)	56752	ENSMUST00000028004.10	-9491	ENSMUSG00000026687	Aldh9a1	aldehyde dehydrogenase 9, subfamily A1
803	chr1	167367901	167368000	100	0.000736488	3' UTR	56752	ENSMUST00000191715.1	3735	ENSMUSG00000026687	Aldh9a1	aldehyde dehydrogenase 9, subfamily A1
804	chr1	168289201	168289300	100	9.07675e-05	Intron (ENSMUST00000188912.6/18514, intron 2 of 7)	18514	ENSMUST00000097471.3	-124539	ENSMUSG00000052534	Pbx1	pre B cell leukemia homeobox 1
805	chr1	168292101	168292200	100	0.000376653	Intron (ENSMUST00000188912.6/18514, intron 2 of 7)	18514	ENSMUST00000097471.3	-127439	ENSMUSG00000052534	Pbx1	pre B cell leukemia homeobox 1
806	chr1	168319201	168319300	100	0.000736488	Intron (ENSMUST00000188912.6/18514, intron 2 of 7)	18514	ENSMUST00000064438.10	112204	ENSMUSG00000052534	Pbx1	pre B cell leukemia homeobox 1
807	chr1	168320801	168320900	100	0.000736488	Intron (ENSMUST00000188912.6/18514, intron 2 of 7)	18514	ENSMUST00000064438.10	110604	ENSMUSG00000052534	Pbx1	pre B cell leukemia homeobox 1
808	chr1	168335101	168335200	100	0.000736488	Intron (ENSMUST00000188912.6/18514, intron 2 of 7)	18514	ENSMUST00000064438.10	96304	ENSMUSG00000052534	Pbx1	pre B cell leukemia homeobox 1
809	chr1	168343001	168343100	100	0.000736488	Intron (ENSMUST00000188912.6/18514, intron 2 of 7)	18514	ENSMUST00000064438.10	88404	ENSMUSG00000052534	Pbx1	pre B cell leukemia homeobox 1
810	chr1	168343701	168343800	100	0.000736488	Intron (ENSMUST00000188912.6/18514, intron 2 of 7)	18514	ENSMUST00000064438.10	87704	ENSMUSG00000052534	Pbx1	pre B cell leukemia homeobox 1
811	chr1	168353201	168353300	100	0.000736488	Intron (ENSMUST00000188912.6/18514, intron 2 of 7)	18514	ENSMUST00000064438.10	78204	ENSMUSG00000052534	Pbx1	pre B cell leukemia homeobox 1
812	chr1	168354101	168354200	100	0.000376653	Intron (ENSMUST00000188912.6/18514, intron 2 of 7)	18514	ENSMUST00000064438.10	77304	ENSMUSG00000052534	Pbx1	pre B cell leukemia homeobox 1
813	chr1	168355801	168355900	100	9.07675e-05	Intron (ENSMUST00000188912.6/18514, intron 2 of 7)	18514	ENSMUST00000064438.10	75604	ENSMUSG00000052534	Pbx1	pre B cell leukemia homeobox 1
814	chr1	168359501	168359600	100	0.000736488	Intron (ENSMUST00000188912.6/18514, intron 2 of 7)	18514	ENSMUST00000064438.10	71904	ENSMUSG00000052534	Pbx1	pre B cell leukemia homeobox 1
815	chr1	168391601	168391700	100	4.29435e-05	Intron (ENSMUST00000188912.6/18514, intron 2 of 7)	18514	ENSMUST00000064438.10	39804	ENSMUSG00000052534	Pbx1	pre B cell leukemia homeobox 1
816	chr1	168394501	168394600	100	0.000376653	Intron (ENSMUST00000188912.6/18514, intron 2 of 7)	18514	ENSMUST00000064438.10	36904	ENSMUSG00000052534	Pbx1	pre B cell leukemia homeobox 1
817	chr1	168395901	168396000	100	7.60547e-07	Intron (ENSMUST00000188912.6/18514, intron 2 of 7)	18514	ENSMUST00000064438.10	35504	ENSMUSG00000052534	Pbx1	pre B cell leukemia homeobox 1
818	chr1	168399601	168399700	100	0.000376653	Intron (ENSMUST00000188912.6/18514, intron 2 of 7)	18514	ENSMUST00000064438.10	31804	ENSMUSG00000052534	Pbx1	pre B cell leukemia homeobox 1
819	chr1	168411501	168411600	100	4.29435e-05	Intron (ENSMUST00000188912.6/18514, intron 2 of 7)	18514	ENSMUST00000064438.10	19904	ENSMUSG00000052534	Pbx1	pre B cell leukemia homeobox 1
820	chr1	168417201	168417300	100	0.000376653	Intron (ENSMUST00000188912.6/18514, intron 2 of 7)	18514	ENSMUST00000064438.10	14204	ENSMUSG00000052534	Pbx1	pre B cell leukemia homeobox 1
821	chr1	168423701	168423800	100	0.000736488	Intron (ENSMUST00000188912.6/18514, intron 2 of 7)	18514	ENSMUST00000064438.10	7704	ENSMUSG00000052534	Pbx1	pre B cell leukemia homeobox 1
822	chr1	170197601	170197700	100	0.000376653	3' UTR	16589	ENSMUST00000150821.7	17034	ENSMUSG00000026667	Uhmk1	U2AF homology motif (UHM) kinase 1
823	chr1	170314701	170314900	200	9.94614e-06	Intron (ENSMUST00000161221.7/70729, intron 3 of 3)	70729	ENSMUST00000162709.1	5880	ENSMUSG00000038473	Nos1ap	nitric oxide synthase 1 (neuronal) adaptor protein
824	chr1	170315001	170315100	100	7.15818e-10	Intron (ENSMUST00000161221.7/70729, intron 3 of 3)	70729	ENSMUST00000162709.1	5680	ENSMUSG00000038473	Nos1ap	nitric oxide synthase 1 (neuronal) adaptor protein
825	chr1	170709701	170709800	100	0.000736488	3' UTR	320078	ENSMUST00000046792.8	65169	ENSMUSG00000038463	Olfml2b	olfactomedin-like 2B
826	chr1	170945501	170945600	100	1.98676e-05	Distal Intergenic	14130	ENSMUST00000161503.1	16030	ENSMUSG00000026656	Fcgr2b	Fc receptor, IgG, low affinity IIb
827	chr1	170945701	170945800	100	5.23872e-15	Distal Intergenic	14130	ENSMUST00000161503.1	15830	ENSMUSG00000026656	Fcgr2b	Fc receptor, IgG, low affinity IIb
828	chr1	170947101	170947200	100	5.23872e-15	Distal Intergenic	14130	ENSMUST00000161503.1	14430	ENSMUSG00000026656	Fcgr2b	Fc receptor, IgG, low affinity IIb
829	chr1	171129301	171129400	100	1.38616e-07	3' UTR	75472	ENSMUST00000124157.2	4267	ENSMUSG00000026649	Cfap126	cilia and flagella associated protein 126
830	chr1	171234801	171234900	100	8.97631e-06	3' UTR	14127	ENSMUST00000079957.11	-436	ENSMUSG00000058715	Fcer1g	Fc receptor, IgE, high affinity I, gamma polypeptide
831	chr1	171238701	171238800	100	0.000376653	Exon (ENSMUST00000013737.12/226646, exon 5 of 13)	226646	ENSMUST00000150108.7	-1173	ENSMUSG00000013593	Ndufs2	NADH:ubiquinone oxidoreductase core subunit S2
832	chr1	171288701	171288800	100	0.000736488	3' UTR	30941	ENSMUST00000065941.11	-710	ENSMUSG00000053483	Usp21	ubiquitin specific peptidase 21
833	chr1	171463401	171463500	100	1.98676e-05	3' UTR	16456	ENSMUST00000155913.1	551	ENSMUSG00000038235	F11r	F11 receptor
834	chr1	172069001	172069100	100	0.000736488	Intron (ENSMUST00000003550.10/59287, intron 11 of 16)	59287	ENSMUST00000135928.1	-937	ENSMUSG00000003458	Ncstn	nicastrin
835	chr1	172119501	172119600	100	9.07675e-05	Exon (ENSMUST00000135192.7/12847, exon 30 of 33)	12847	ENSMUST00000142765.1	1399	ENSMUSG00000026553	Copa	coatomer protein complex subunit alpha
836	chr1	172121901	172122000	100	0.000376653	3' UTR	12847	ENSMUST00000142765.1	3799	ENSMUSG00000026553	Copa	coatomer protein complex subunit alpha
837	chr1	172143901	172144000	100	1.98676e-05	Distal Intergenic	98193	ENSMUST00000193638.5	-4084	ENSMUSG00000026554	Dcaf8	DDB1 and CUL4 associated factor 8
838	chr1	172172301	172172400	100	0.000736488	Exon (ENSMUST00000193638.5/98193, exon 4 of 14)	98193	ENSMUST00000194972.1	-1554	ENSMUSG00000026554	Dcaf8	DDB1 and CUL4 associated factor 8
839	chr1	172172501	172172700	200	0.000556571	Exon (ENSMUST00000193638.5/98193, exon 4 of 14)	98193	ENSMUST00000194972.1	-1254	ENSMUSG00000026554	Dcaf8	DDB1 and CUL4 associated factor 8
840	chr1	172175701	172175800	100	0.000736488	Exon (ENSMUST00000194972.1/98193, exon 2 of 2)	98193	ENSMUST00000195345.1	1643	ENSMUSG00000026554	Dcaf8	DDB1 and CUL4 associated factor 8
841	chr1	172187001	172187100	100	0.000376653	Exon (ENSMUST00000192031.1/98193, exon 8 of 9)	98193	ENSMUST00000191891.1	-281	ENSMUSG00000026554	Dcaf8	DDB1 and CUL4 associated factor 8
842	chr1	172187801	172187900	100	0.000376653	Exon (ENSMUST00000195394.5/98193, exon 10 of 10)	98193	ENSMUST00000191891.1	420	ENSMUSG00000026554	Dcaf8	DDB1 and CUL4 associated factor 8
843	chr1	172188201	172188300	100	8.97631e-06	Exon (ENSMUST00000195394.5/98193, exon 10 of 10)	98193	ENSMUST00000191891.1	820	ENSMUSG00000026554	Dcaf8	DDB1 and CUL4 associated factor 8
844	chr1	172188501	172188600	100	0.000188117	Exon (ENSMUST00000195394.5/98193, exon 10 of 10)	98193	ENSMUST00000191891.1	1120	ENSMUSG00000026554	Dcaf8	DDB1 and CUL4 associated factor 8
845	chr1	172189101	172189200	100	0.000376653	Exon (ENSMUST00000195011.5/98193, exon 11 of 11)	98193	ENSMUST00000191891.1	1720	ENSMUSG00000026554	Dcaf8	DDB1 and CUL4 associated factor 8
846	chr1	172194501	172194600	100	0.000376653	3' UTR	18611	ENSMUST00000125361.1	5215	ENSMUSG00000013698	Pea15a	phosphoprotein enriched in astrocytes 15A
847	chr1	172195101	172195200	100	0.000188117	3' UTR	18611	ENSMUST00000125361.1	4615	ENSMUSG00000013698	Pea15a	phosphoprotein enriched in astrocytes 15A
848	chr1	172195501	172195600	100	0.000736488	3' UTR	18611	ENSMUST00000125361.1	4215	ENSMUSG00000013698	Pea15a	phosphoprotein enriched in astrocytes 15A
849	chr1	172195701	172195800	100	0.000188117	3' UTR	18611	ENSMUST00000125361.1	4015	ENSMUSG00000013698	Pea15a	phosphoprotein enriched in astrocytes 15A
850	chr1	172197301	172197400	100	0.000188117	3' UTR	18611	ENSMUST00000125361.1	2415	ENSMUSG00000013698	Pea15a	phosphoprotein enriched in astrocytes 15A
851	chr1	172197601	172198000	400	0.000151126	3' UTR	18611	ENSMUST00000125361.1	1815	ENSMUSG00000013698	Pea15a	phosphoprotein enriched in astrocytes 15A
852	chr1	172199301	172199400	100	0.000188117	Exon (ENSMUST00000125361.1/18611, exon 1 of 2)	18611	ENSMUST00000125361.1	415	ENSMUSG00000013698	Pea15a	phosphoprotein enriched in astrocytes 15A
853	chr1	172201001	172201100	100	0.000736488	Intron (ENSMUST00000013842.11/18611, intron 1 of 3)	18611	ENSMUST00000125361.1	-1186	ENSMUSG00000013698	Pea15a	phosphoprotein enriched in astrocytes 15A
854	chr1	172507001	172507100	100	0.000188117	3' UTR	21346	ENSMUST00000111228.1	5749	ENSMUSG00000026547	Tagln2	transgelin 2
855	chr1	172668701	172668800	100	0.000736488	Distal Intergenic	12944	ENSMUST00000038495.4	-29255	ENSMUSG00000037942	Crp	C-reactive protein, pentraxin-related
856	chr1	176756501	176756700	200	3.14056e-05	Promoter	545389	ENSMUST00000192927.5	0	ENSMUSG00000057335	Cep170	centrosomal protein 170
857	chr1	176784301	176784400	100	0.000188117	Intron (ENSMUST00000057037.12/545389, intron 4 of 19)	545389	ENSMUST00000194371.1	-2001	ENSMUSG00000057335	Cep170	centrosomal protein 170
858	chr1	176788001	176788100	100	0.000736488	Intron (ENSMUST00000057037.12/545389, intron 4 of 19)	545389	ENSMUST00000194727.5	5509	ENSMUSG00000057335	Cep170	centrosomal protein 170
859	chr1	177015001	177015100	100	0.000736488	Intron (ENSMUST00000027785.14/76816, intron 17 of 17)	76816	ENSMUST00000139589.1	16992	ENSMUSG00000026504	Sdccag8	serologically defined colon cancer antigen 8
860	chr1	177020201	177020300	100	0.000736488	3' UTR	76816	ENSMUST00000139589.1	22192	ENSMUSG00000026504	Sdccag8	serologically defined colon cancer antigen 8
861	chr1	177024501	177024600	100	4.29435e-05	3' UTR	76816	ENSMUST00000139589.1	26492	ENSMUSG00000026504	Sdccag8	serologically defined colon cancer antigen 8
862	chr1	177174501	177174600	100	1.98676e-05	Intron (ENSMUST00000019843.14/23797, intron 1 of 12)	23797	ENSMUST00000111160.8	74167	ENSMUSG00000019699	Akt3	thymoma viral proto-oncogene 3
863	chr1	177177901	177178000	100	9.07675e-05	Intron (ENSMUST00000019843.14/23797, intron 1 of 12)	23797	ENSMUST00000111160.8	70767	ENSMUSG00000019699	Akt3	thymoma viral proto-oncogene 3
864	chr1	177209701	177209800	100	0.000376653	Intron (ENSMUST00000019843.14/23797, intron 1 of 12)	23797	ENSMUST00000111160.8	38967	ENSMUSG00000019699	Akt3	thymoma viral proto-oncogene 3
865	chr1	177227401	177227500	100	0.000736488	Intron (ENSMUST00000019843.14/23797, intron 1 of 12)	23797	ENSMUST00000111160.8	21267	ENSMUSG00000019699	Akt3	thymoma viral proto-oncogene 3
866	chr1	177248001	177248100	100	0.000736488	Intron (ENSMUST00000019843.14/23797, intron 1 of 12)	23797	ENSMUST00000111160.8	667	ENSMUSG00000019699	Akt3	thymoma viral proto-oncogene 3
867	chr1	177653301	177653400	100	0.000736488	Distal Intergenic	75589	ENSMUST00000189507.1	-10358	ENSMUSG00000101746	2310043L19Rik	RIKEN cDNA 2310043L19 gene
868	chr1	177763901	177764000	100	3.26219e-07	3' UTR	11566	ENSMUST00000159184.1	4601	ENSMUSG00000015961	Adss	adenylosuccinate synthetase, non muscle
869	chr1	177770801	177770900	100	0.000736488	Intron (ENSMUST00000016105.8/11566, intron 10 of 12)	11566	ENSMUST00000159184.1	-2200	ENSMUSG00000015961	Adss	adenylosuccinate synthetase, non muscle
870	chr1	178321201	178321300	100	1.98676e-05	Exon (ENSMUST00000159117.1/51810, exon 2 of 2)	66359	ENSMUST00000027781.6	2071	ENSMUSG00000026500	Cox20	cytochrome c oxidase assembly protein 20
871	chr1	178321401	178321600	200	1.00031e-05	Exon (ENSMUST00000159117.1/51810, exon 2 of 2)	66359	ENSMUST00000027781.6	2271	ENSMUSG00000026500	Cox20	cytochrome c oxidase assembly protein 20
872	chr1	178321901	178322100	200	9.85465e-05	Exon (ENSMUST00000154437.1/66359, exon 2 of 2)	51810	ENSMUST00000159117.1	2071	ENSMUSG00000039630	Hnrnpu	heterogeneous nuclear ribonucleoprotein U
873	chr1	178322701	178322900	200	4.5764e-05	Exon (ENSMUST00000159117.1/51810, exon 2 of 2)	51810	ENSMUST00000159117.1	1271	ENSMUSG00000039630	Hnrnpu	heterogeneous nuclear ribonucleoprotein U
874	chr1	178323201	178323300	100	0.000376653	Intron (ENSMUST00000159117.1/51810, intron 1 of 1)	51810	ENSMUST00000159117.1	871	ENSMUSG00000039630	Hnrnpu	heterogeneous nuclear ribonucleoprotein U
875	chr1	178324601	178324700	100	0.000736488	3' UTR	51810	ENSMUST00000159117.1	-430	ENSMUSG00000039630	Hnrnpu	heterogeneous nuclear ribonucleoprotein U
876	chr1	178325901	178326000	100	1.98676e-05	3' UTR	51810	ENSMUST00000159117.1	-1730	ENSMUSG00000039630	Hnrnpu	heterogeneous nuclear ribonucleoprotein U
877	chr1	178326601	178326700	100	0.000376653	3' UTR	51810	ENSMUST00000159117.1	-2430	ENSMUSG00000039630	Hnrnpu	heterogeneous nuclear ribonucleoprotein U
878	chr1	178327101	178327200	100	8.97631e-06	3' UTR	51810	ENSMUST00000189450.1	2207	ENSMUSG00000039630	Hnrnpu	heterogeneous nuclear ribonucleoprotein U
879	chr1	178327701	178327800	100	0.000376653	3' UTR	51810	ENSMUST00000189450.1	1607	ENSMUSG00000039630	Hnrnpu	heterogeneous nuclear ribonucleoprotein U
880	chr1	178328001	178328100	100	0.000376653	3' UTR	51810	ENSMUST00000189450.1	1307	ENSMUSG00000039630	Hnrnpu	heterogeneous nuclear ribonucleoprotein U
881	chr1	178329101	178329200	100	0.000188117	3' UTR	51810	ENSMUST00000189450.1	207	ENSMUSG00000039630	Hnrnpu	heterogeneous nuclear ribonucleoprotein U
882	chr1	178330601	178330700	100	2.4663e-08	Promoter	51810	ENSMUST00000188044.6	0	ENSMUSG00000039630	Hnrnpu	heterogeneous nuclear ribonucleoprotein U
883	chr1	178331101	178331200	100	9.07675e-05	Exon (ENSMUST00000161769.7/51810, exon 10 of 17)	51810	ENSMUST00000188044.6	-480	ENSMUSG00000039630	Hnrnpu	heterogeneous nuclear ribonucleoprotein U
884	chr1	178331801	178331900	100	1.98676e-05	Exon (ENSMUST00000161769.7/51810, exon 8 of 17)	51810	ENSMUST00000150825.1	1026	ENSMUSG00000039630	Hnrnpu	heterogeneous nuclear ribonucleoprotein U
885	chr1	178332101	178332200	100	4.29435e-05	Exon (ENSMUST00000161769.7/51810, exon 7 of 17)	51810	ENSMUST00000150825.1	726	ENSMUSG00000039630	Hnrnpu	heterogeneous nuclear ribonucleoprotein U
886	chr1	178334401	178334500	100	4.29435e-05	Exon (ENSMUST00000146362.1/51810, exon 1 of 5)	51810	ENSMUST00000146362.1	46	ENSMUSG00000039630	Hnrnpu	heterogeneous nuclear ribonucleoprotein U
887	chr1	178334601	178334800	200	0.000736488	Intron (ENSMUST00000161769.7/51810, intron 3 of 16)	51810	ENSMUST00000146362.1	-55	ENSMUSG00000039630	Hnrnpu	heterogeneous nuclear ribonucleoprotein U
888	chr1	178335001	178335300	300	0.000257724	Intron (ENSMUST00000161769.7/51810, intron 3 of 16)	51810	ENSMUST00000146362.1	-455	ENSMUSG00000039630	Hnrnpu	heterogeneous nuclear ribonucleoprotein U
889	chr1	178335501	178335700	200	0.00011553	Exon (ENSMUST00000134291.1/51810, exon 2 of 2)	51810	ENSMUST00000134291.1	705	ENSMUSG00000039630	Hnrnpu	heterogeneous nuclear ribonucleoprotein U
890	chr1	178336901	178337200	300	0.000139974	Exon (ENSMUST00000161769.7/51810, exon 1 of 17)	51810	ENSMUST00000134291.1	-496	ENSMUSG00000039630	Hnrnpu	heterogeneous nuclear ribonucleoprotein U
891	chr1	178337301	178337500	200	4.48903e-06	Exon (ENSMUST00000161769.7/51810, exon 1 of 17)	51810	ENSMUST00000161769.7	228	ENSMUSG00000039630	Hnrnpu	heterogeneous nuclear ribonucleoprotein U
892	chr1	179753001	179753100	100	0.000736488	Exon (ENSMUST00000027768.13/226747, exon 33 of 36)	226747	ENSMUST00000151734.1	480	ENSMUSG00000026491	Ahctf1	AT hook containing transcription factor 1
893	chr1	179753301	179753400	100	0.000736488	Exon (ENSMUST00000027768.13/226747, exon 33 of 36)	226747	ENSMUST00000151734.1	180	ENSMUSG00000026491	Ahctf1	AT hook containing transcription factor 1
894	chr1	179795701	179795800	100	0.000736488	Exon (ENSMUST00000027768.13/226747, exon 3 of 36)	226747	ENSMUST00000147137.1	7806	ENSMUSG00000026491	Ahctf1	AT hook containing transcription factor 1
895	chr1	180094001	180094100	100	0.000376653	Exon (ENSMUST00000097453.8/226751, exon 13 of 35)	226751	ENSMUST00000133890.7	-7044	ENSMUSG00000026490	Cdc42bpa	CDC42 binding protein kinase alpha
896	chr1	180097301	180097400	100	0.000376653	Intron (ENSMUST00000097453.8/226751, intron 14 of 34)	226751	ENSMUST00000133890.7	-3744	ENSMUSG00000026490	Cdc42bpa	CDC42 binding protein kinase alpha
897	chr1	180101901	180102000	100	0.000736488	Intron (ENSMUST00000097453.8/226751, intron 15 of 34)	226751	ENSMUST00000133890.7	757	ENSMUSG00000026490	Cdc42bpa	CDC42 binding protein kinase alpha
898	chr1	180162101	180162200	100	4.29435e-05	3' UTR	226751	ENSMUST00000129754.1	1094	ENSMUSG00000026490	Cdc42bpa	CDC42 binding protein kinase alpha
899	chr1	180163101	180163200	100	0.000376653	3' UTR	226751	ENSMUST00000129754.1	2094	ENSMUSG00000026490	Cdc42bpa	CDC42 binding protein kinase alpha
900	chr1	180802601	180802800	200	1.75441e-07	3' UTR	15078	ENSMUST00000159789.1	10734	ENSMUSG00000060743	H3f3a	H3.3 histone A
901	chr1	180802901	180803000	100	0.000736488	3' UTR	15078	ENSMUST00000159789.1	10534	ENSMUSG00000060743	H3f3a	H3.3 histone A
902	chr1	181174601	181174800	200	0.000188396	3' UTR	226757	ENSMUST00000159290.1	8939	ENSMUSG00000038733	Wdr26	WD repeat domain 26
903	chr1	181175101	181175200	100	9.07675e-05	3' UTR	226757	ENSMUST00000159290.1	8539	ENSMUSG00000038733	Wdr26	WD repeat domain 26
904	chr1	181176001	181176300	300	0.000385362	3' UTR	226757	ENSMUST00000159290.1	7439	ENSMUSG00000038733	Wdr26	WD repeat domain 26
905	chr1	181176801	181176900	100	1.75465e-06	3' UTR	226757	ENSMUST00000159290.1	6839	ENSMUSG00000038733	Wdr26	WD repeat domain 26
906	chr1	181177001	181177100	100	0.000736488	3' UTR	226757	ENSMUST00000159290.1	6639	ENSMUSG00000038733	Wdr26	WD repeat domain 26
907	chr1	181177501	181177600	100	1.98676e-05	3' UTR	226757	ENSMUST00000159290.1	6139	ENSMUSG00000038733	Wdr26	WD repeat domain 26
908	chr1	181177901	181178100	200	0.000376653	Intron (ENSMUST00000162819.8/226757, intron 13 of 13)	226757	ENSMUST00000159290.1	5639	ENSMUSG00000038733	Wdr26	WD repeat domain 26
909	chr1	181178301	181178400	100	1.75465e-06	Intron (ENSMUST00000162819.8/226757, intron 13 of 13)	226757	ENSMUST00000159290.1	5339	ENSMUSG00000038733	Wdr26	WD repeat domain 26
910	chr1	181178901	181179000	100	0.000736488	Intron (ENSMUST00000162819.8/226757, intron 13 of 13)	226757	ENSMUST00000159290.1	4739	ENSMUSG00000038733	Wdr26	WD repeat domain 26
911	chr1	181179101	181179200	100	0.000188117	Intron (ENSMUST00000162819.8/226757, intron 13 of 13)	226757	ENSMUST00000159290.1	4539	ENSMUSG00000038733	Wdr26	WD repeat domain 26
912	chr1	181180501	181180600	100	0.000376653	3' UTR	226757	ENSMUST00000159290.1	3139	ENSMUSG00000038733	Wdr26	WD repeat domain 26
913	chr1	181211101	181211200	100	9.07675e-05	Exon (ENSMUST00000162819.8/226757, exon 1 of 14)	226757	ENSMUST00000036329.11	226	ENSMUSG00000038733	Wdr26	WD repeat domain 26
914	chr1	181211401	181211500	100	0.000376653	Promoter	226757	ENSMUST00000162963.7	0	ENSMUSG00000038733	Wdr26	WD repeat domain 26
915	chr1	181241901	181242200	300	6.56977e-05	Exon (ENSMUST00000117444.1/ENSMUST00000117444.1, exon 1 of 1)	226757	ENSMUST00000237749.1	-29900	ENSMUSG00000038733	Wdr26	WD repeat domain 26
916	chr1	182257101	182257300	200	4.53839e-05	Distal Intergenic	13244	ENSMUST00000133052.1	24924	ENSMUSG00000038633	Degs1	delta(4)-desaturase, sphingolipid 1
917	chr1	182259001	182259100	100	3.99162e-06	Distal Intergenic	13244	ENSMUST00000133052.1	23124	ENSMUSG00000038633	Degs1	delta(4)-desaturase, sphingolipid 1
918	chr1	182261801	182261900	100	0.000188117	Distal Intergenic	13244	ENSMUST00000133052.1	20324	ENSMUSG00000038633	Degs1	delta(4)-desaturase, sphingolipid 1
919	chr1	182265001	182265100	100	4.29435e-05	Distal Intergenic	13244	ENSMUST00000133052.1	17124	ENSMUSG00000038633	Degs1	delta(4)-desaturase, sphingolipid 1
920	chr1	182265501	182265600	100	1.75465e-06	Distal Intergenic	13244	ENSMUST00000133052.1	16624	ENSMUSG00000038633	Degs1	delta(4)-desaturase, sphingolipid 1
921	chr1	182482201	182482300	100	0.000736488	Intron (ENSMUST00000068505.9/12334, intron 11 of 20)	12334	ENSMUST00000194961.1	-707	ENSMUSG00000026509	Capn2	calpain 2
922	chr1	182517201	182517300	100	9.07675e-05	Exon (ENSMUST00000068505.9/12334, exon 1 of 21)	12334	ENSMUST00000068505.9	224	ENSMUSG00000026509	Capn2	calpain 2
923	chr1	183299101	183299300	200	9.85465e-05	Intron (ENSMUST00000109166.7/108909, intron 1 of 9)	108909	ENSMUST00000193959.5	1531	ENSMUSG00000042901	Aida	axin interactor, dorsalization associated
924	chr1	183299401	183299500	100	3.26219e-07	Intron (ENSMUST00000109166.7/108909, intron 1 of 9)	108909	ENSMUST00000193959.5	1831	ENSMUSG00000042901	Aida	axin interactor, dorsalization associated
925	chr1	184824401	184824500	100	0.000376653	Intron (ENSMUST00000068725.9/67247, intron 4 of 7)	67247	ENSMUST00000161341.7	-1366	ENSMUSG00000073481	Mtarc2	mitochondrial amidoxime reducing component 2
926	chr1	184872701	184872900	200	0.000462303	3' UTR	226777	ENSMUST00000048308.5	10318	ENSMUSG00000039349	C130074G19Rik	RIKEN cDNA C130074G19 gene
927	chr1	187250801	187250900	100	0.000736488	Intron (ENSMUST00000160481.7/67769, intron 5 of 10)	67769	ENSMUST00000160570.1	24621	ENSMUSG00000039210	Gpatch2	G patch domain containing 2
928	chr1	189728401	189728500	100	0.000376653	5' UTR	19250	ENSMUST00000194127.5	126	ENSMUSG00000026604	Ptpn14	protein tyrosine phosphatase, non-receptor type 14
929	chr1	189869901	189870000	100	0.000376653	Exon (ENSMUST00000097442.8/19250, exon 19 of 19)	19250	ENSMUST00000148129.1	7242	ENSMUSG00000026604	Ptpn14	protein tyrosine phosphatase, non-receptor type 14
930	chr1	189873101	189873200	100	0.000736488	3' UTR	226830	ENSMUST00000132289.1	9172	ENSMUSG00000026603	Smyd2	SET and MYND domain containing 2
931	chr1	189882601	189882700	100	0.000376653	Exon (ENSMUST00000193794.1/ENSMUST00000193794.1, exon 1 of 1)	226830	ENSMUST00000132289.1	-229	ENSMUSG00000026603	Smyd2	SET and MYND domain containing 2
932	chr1	189884901	189885000	100	3.99162e-06	Intron (ENSMUST00000027897.7/226830, intron 9 of 11)	226830	ENSMUST00000132289.1	-2529	ENSMUSG00000026603	Smyd2	SET and MYND domain containing 2
933	chr1	191352401	191352500	100	8.97631e-06	3' UTR	226849	ENSMUST00000191920.1	3965	ENSMUSG00000026626	Ppp2r5a	protein phosphatase 2, regulatory subunit B', alpha
934	chr1	191360501	191360600	100	7.60547e-07	Intron (ENSMUST00000067976.8/226849, intron 4 of 12)	226849	ENSMUST00000191920.1	-4036	ENSMUSG00000026626	Ppp2r5a	protein phosphatase 2, regulatory subunit B', alpha
935	chr1	191780601	191780700	100	9.07675e-05	3' UTR	18005	ENSMUST00000027931.7	-40744	ENSMUSG00000026622	Nek2	NIMA (never in mitosis gene a)-related expressed kinase 2
936	chr1	191780901	191781000	100	8.97631e-06	3' UTR	18005	ENSMUST00000027931.7	-40444	ENSMUSG00000026622	Nek2	NIMA (never in mitosis gene a)-related expressed kinase 2
937	chr1	191781801	191781900	100	9.07675e-05	3' UTR	18005	ENSMUST00000027931.7	-39544	ENSMUSG00000026622	Nek2	NIMA (never in mitosis gene a)-related expressed kinase 2
938	chr1	191782001	191782100	100	4.29435e-05	3' UTR	18005	ENSMUST00000027931.7	-39344	ENSMUSG00000026622	Nek2	NIMA (never in mitosis gene a)-related expressed kinase 2
939	chr1	191933701	191933800	100	0.000736488	Distal Intergenic	98736	ENSMUST00000069573.5	-26174	ENSMUSG00000055833	1700034H15Rik	RIKEN cDNA 1700034H15 gene
940	chr1	191934401	191934500	100	1.75465e-06	Distal Intergenic	98736	ENSMUST00000069573.5	-26874	ENSMUSG00000055833	1700034H15Rik	RIKEN cDNA 1700034H15 gene
941	chr1	191935501	191935600	100	0.000376653	Distal Intergenic	98736	ENSMUST00000069573.5	-27974	ENSMUSG00000055833	1700034H15Rik	RIKEN cDNA 1700034H15 gene
942	chr1	191936701	191936800	100	0.000188117	Distal Intergenic	98736	ENSMUST00000069573.5	-29174	ENSMUSG00000055833	1700034H15Rik	RIKEN cDNA 1700034H15 gene
943	chr1	191937801	191937900	100	0.000188117	Distal Intergenic	98736	ENSMUST00000069573.5	-30274	ENSMUSG00000055833	1700034H15Rik	RIKEN cDNA 1700034H15 gene
944	chr1	192056301	192056400	100	0.000376653	Exon (ENSMUST00000193355.1/22033, exon 3 of 3)	22033	ENSMUST00000195815.1	2762	ENSMUSG00000026637	Traf5	TNF receptor-associated factor 5
945	chr1	192056701	192056800	100	7.60547e-07	Exon (ENSMUST00000193355.1/22033, exon 3 of 3)	22033	ENSMUST00000195815.1	2362	ENSMUSG00000026637	Traf5	TNF receptor-associated factor 5
946	chr1	192089901	192090000	100	0.000736488	Intron (ENSMUST00000085573.11/22033, intron 1 of 11)	22033	ENSMUST00000085573.11	2559	ENSMUSG00000026637	Traf5	TNF receptor-associated factor 5
947	chr1	192137701	192137800	100	0.000736488	Exon (ENSMUST00000110849.9/214742, exon 1 of 11)	214742	ENSMUST00000193144.1	-41	ENSMUSG00000037395	Rcor3	REST corepressor 3
948	chr1	192891401	192891500	100	0.000736488	3' UTR	214791	ENSMUST00000155579.7	-35645	ENSMUSG00000016262	Sertad4	SERTA domain containing 4
949	chr1	192891901	192892100	200	0.000413628	3' UTR	214791	ENSMUST00000155579.7	-36145	ENSMUSG00000016262	Sertad4	SERTA domain containing 4
950	chr1	192892301	192892400	100	0.000736488	3' UTR	214791	ENSMUST00000155579.7	-36545	ENSMUSG00000016262	Sertad4	SERTA domain containing 4
951	chr1	192893701	192893800	100	0.000376653	3' UTR	214791	ENSMUST00000155579.7	-37945	ENSMUSG00000016262	Sertad4	SERTA domain containing 4
952	chr1	192894101	192894200	100	0.000188117	3' UTR	214791	ENSMUST00000155579.7	-38345	ENSMUSG00000016262	Sertad4	SERTA domain containing 4
953	chr1	192895301	192895400	100	0.000736488	3' UTR	214791	ENSMUST00000155579.7	-39545	ENSMUSG00000016262	Sertad4	SERTA domain containing 4
954	chr1	192895701	192895800	100	0.000736488	3' UTR	214791	ENSMUST00000155579.7	-39945	ENSMUSG00000016262	Sertad4	SERTA domain containing 4
955	chr1	192897101	192897400	300	0.000385362	3' UTR	214791	ENSMUST00000155579.7	-41345	ENSMUSG00000016262	Sertad4	SERTA domain containing 4
956	chr1	192911501	192911600	100	0.000736488	Intron (ENSMUST00000195354.5/329324, intron 6 of 7)	214791	ENSMUST00000155579.7	-55745	ENSMUSG00000016262	Sertad4	SERTA domain containing 4
957	chr1	192930301	192930400	100	0.000376653	Exon (ENSMUST00000191907.1/329324, exon 3 of 3)	214791	ENSMUST00000155579.7	-74545	ENSMUSG00000016262	Sertad4	SERTA domain containing 4
958	chr1	192983501	192983600	100	0.000188117	Exon (ENSMUST00000215093.1/329324, exon 4 of 9)	329324	ENSMUST00000191907.1	52044	ENSMUSG00000016200	Syt14	synaptotagmin XIV
959	chr1	192983901	192984000	100	0.000376653	Exon (ENSMUST00000215093.1/329324, exon 4 of 9)	329324	ENSMUST00000191907.1	51644	ENSMUSG00000016200	Syt14	synaptotagmin XIV
960	chr1	192984501	192984600	100	0.000736488	5' UTR	329324	ENSMUST00000191907.1	51044	ENSMUSG00000016200	Syt14	synaptotagmin XIV
961	chr1	192986101	192986200	100	0.000736488	Intron (ENSMUST00000195354.5/329324, intron 3 of 7)	329324	ENSMUST00000191907.1	49444	ENSMUSG00000016200	Syt14	synaptotagmin XIV
962	chr1	192993601	192993700	100	0.000376653	Intron (ENSMUST00000195354.5/329324, intron 2 of 7)	329324	ENSMUST00000191907.1	41944	ENSMUSG00000016200	Syt14	synaptotagmin XIV
963	chr1	192998001	192998100	100	4.29435e-05	Intron (ENSMUST00000195354.5/329324, intron 2 of 7)	329324	ENSMUST00000191907.1	37544	ENSMUSG00000016200	Syt14	synaptotagmin XIV
964	chr1	193005801	193005900	100	0.000736488	Intron (ENSMUST00000195354.5/329324, intron 2 of 7)	329324	ENSMUST00000191907.1	29744	ENSMUSG00000016200	Syt14	synaptotagmin XIV
965	chr1	193007801	193007900	100	4.29435e-05	Intron (ENSMUST00000195354.5/329324, intron 2 of 7)	329324	ENSMUST00000191907.1	27744	ENSMUSG00000016200	Syt14	synaptotagmin XIV
966	chr1	193011201	193011300	100	9.07675e-05	Intron (ENSMUST00000195354.5/329324, intron 2 of 7)	329324	ENSMUST00000191907.1	24344	ENSMUSG00000016200	Syt14	synaptotagmin XIV
967	chr1	193012201	193012300	100	0.000736488	Intron (ENSMUST00000195354.5/329324, intron 2 of 7)	329324	ENSMUST00000191907.1	23344	ENSMUSG00000016200	Syt14	synaptotagmin XIV
968	chr1	193012501	193012600	100	0.000736488	Intron (ENSMUST00000195354.5/329324, intron 2 of 7)	329324	ENSMUST00000191907.1	23044	ENSMUSG00000016200	Syt14	synaptotagmin XIV
969	chr1	193013201	193013300	100	0.000736488	Intron (ENSMUST00000195354.5/329324, intron 2 of 7)	329324	ENSMUST00000191907.1	22344	ENSMUSG00000016200	Syt14	synaptotagmin XIV
970	chr1	193016501	193016600	100	0.000188117	Intron (ENSMUST00000195354.5/329324, intron 2 of 7)	329324	ENSMUST00000191907.1	19044	ENSMUSG00000016200	Syt14	synaptotagmin XIV
971	chr1	193016801	193016900	100	0.000188117	Intron (ENSMUST00000195354.5/329324, intron 2 of 7)	329324	ENSMUST00000191907.1	18744	ENSMUSG00000016200	Syt14	synaptotagmin XIV
972	chr1	193019901	193020000	100	7.60547e-07	Intron (ENSMUST00000195354.5/329324, intron 2 of 7)	329324	ENSMUST00000191907.1	15644	ENSMUSG00000016200	Syt14	synaptotagmin XIV
973	chr1	193020201	193020300	100	9.07675e-05	Intron (ENSMUST00000195354.5/329324, intron 2 of 7)	329324	ENSMUST00000191907.1	15344	ENSMUSG00000016200	Syt14	synaptotagmin XIV
974	chr1	193021601	193021800	200	0.000413628	Intron (ENSMUST00000195354.5/329324, intron 2 of 7)	329324	ENSMUST00000191907.1	13844	ENSMUSG00000016200	Syt14	synaptotagmin XIV
975	chr1	193021901	193022100	200	0.000736488	Intron (ENSMUST00000195354.5/329324, intron 2 of 7)	329324	ENSMUST00000191907.1	13544	ENSMUSG00000016200	Syt14	synaptotagmin XIV
976	chr1	193022201	193022400	200	0.000372732	Intron (ENSMUST00000195354.5/329324, intron 2 of 7)	329324	ENSMUST00000191907.1	13244	ENSMUSG00000016200	Syt14	synaptotagmin XIV
977	chr1	193022601	193022900	300	0.00012566	Intron (ENSMUST00000195354.5/329324, intron 2 of 7)	329324	ENSMUST00000191907.1	12744	ENSMUSG00000016200	Syt14	synaptotagmin XIV
978	chr1	193023501	193024200	700	0.000135791	Intron (ENSMUST00000195354.5/329324, intron 2 of 7)	329324	ENSMUST00000191907.1	11444	ENSMUSG00000016200	Syt14	synaptotagmin XIV
979	chr1	193025601	193025700	100	0.000188117	Intron (ENSMUST00000195354.5/329324, intron 2 of 7)	329324	ENSMUST00000191907.1	9944	ENSMUSG00000016200	Syt14	synaptotagmin XIV
980	chr1	193026301	193026400	100	0.000188117	Intron (ENSMUST00000195354.5/329324, intron 2 of 7)	329324	ENSMUST00000191907.1	9244	ENSMUSG00000016200	Syt14	synaptotagmin XIV
981	chr1	193343501	193343600	100	0.000736488	3' UTR	215303	ENSMUST00000163202.1	16178	ENSMUSG00000016179	Camk1g	calcium/calmodulin-dependent protein kinase I gamma
982	chr1	194619901	194620000	100	0.000736488	5' UTR	18845	ENSMUST00000027952.11	76	ENSMUSG00000026640	Plxna2	plexin A2
983	chr1	194644201	194644300	100	1.75465e-06	Exon (ENSMUST00000027952.11/18845, exon 2 of 32)	18845	ENSMUST00000125381.1	-556	ENSMUSG00000026640	Plxna2	plexin A2
984	chr1	194644501	194644600	100	0.000188117	Exon (ENSMUST00000027952.11/18845, exon 2 of 32)	18845	ENSMUST00000125381.1	-256	ENSMUSG00000026640	Plxna2	plexin A2
985	chr1	194659301	194659400	100	0.000736488	Exon (ENSMUST00000125381.1/18845, exon 3 of 3)	18845	ENSMUST00000125381.1	14445	ENSMUSG00000026640	Plxna2	plexin A2
986	chr1	194813501	194813600	100	0.000376653	3' UTR	100628615	ENSMUST00000174892.1	-8401	ENSMUSG00000092633	Mir3962	microRNA 3962
987	chr1	194976401	194976500	100	1.98676e-05	Exon (ENSMUST00000181226.7/320977, exon 1 of 4)	320977	ENSMUST00000181947.7	16	ENSMUSG00000096929	A330023F24Rik	RIKEN cDNA A330023F24 gene
988	chr1	194977201	194977300	100	0.000376653	Intron (ENSMUST00000181226.7/320977, intron 1 of 3)	320400	ENSMUST00000180780.2	-241	ENSMUSG00000097325	Gm16897	predicted gene, 16897
989	chr1	194979901	194980000	100	0.000736488	Intron (ENSMUST00000181226.7/320977, intron 1 of 3)	320400	ENSMUST00000180780.2	-2941	ENSMUSG00000097325	Gm16897	predicted gene, 16897
990	chr1	194981801	194981900	100	0.000736488	Intron (ENSMUST00000181226.7/320977, intron 1 of 3)	320400	ENSMUST00000180780.2	-4841	ENSMUSG00000097325	Gm16897	predicted gene, 16897
991	chr1	194989001	194989200	200	0.000556571	Exon (ENSMUST00000191885.1/ENSMUST00000191885.1, exon 2 of 2)	320400	ENSMUST00000180780.2	-12041	ENSMUSG00000097325	Gm16897	predicted gene, 16897
992	chr1	194990401	194990500	100	0.000736488	Intron (ENSMUST00000181226.7/320977, intron 2 of 3)	320400	ENSMUST00000180780.2	-13441	ENSMUSG00000097325	Gm16897	predicted gene, 16897
993	chr1	194991301	194991400	100	0.000376653	Intron (ENSMUST00000181226.7/320977, intron 2 of 3)	320400	ENSMUST00000180780.2	-14341	ENSMUSG00000097325	Gm16897	predicted gene, 16897
994	chr1	194995101	194995200	100	0.000376653	Exon (ENSMUST00000192325.1/ENSMUST00000192325.1, exon 1 of 1)	320400	ENSMUST00000180780.2	-18141	ENSMUSG00000097325	Gm16897	predicted gene, 16897
995	chr1	195000801	195000900	100	0.000736488	Intron (ENSMUST00000181226.7/320977, intron 2 of 3)	320977	ENSMUST00000181273.6	-16498	ENSMUSG00000096929	A330023F24Rik	RIKEN cDNA A330023F24 gene
996	chr1	195009301	195009400	100	0.000736488	Intron (ENSMUST00000181226.7/320977, intron 2 of 3)	320977	ENSMUST00000181273.6	-7998	ENSMUSG00000096929	A330023F24Rik	RIKEN cDNA A330023F24 gene
997	chr1	195034701	195034800	100	0.000736488	Exon (ENSMUST00000181273.6/320977, exon 8 of 8)	723963	ENSMUST00000083478.3	-2240	ENSMUSG00000065412	Mir29b-2	microRNA 29b-2
998	chr10	3973101	3973200	100	9.07675e-05	Promoter	270685	ENSMUST00000117291.7	0	ENSMUSG00000040675	Mthfd1l	methylenetetrahydrofolate dehydrogenase (NADP+ dependent) 1-like
999	chr10	4337701	4337800	100	0.000188117	Intron (ENSMUST00000045730.6/83397, intron 2 of 3)	83397	ENSMUST00000216139.1	-9041	ENSMUSG00000038587	Akap12	A kinase (PRKA) anchor protein (gravin) 12
1000	chr10	4353101	4353500	400	0.000186576	5' UTR	83397	ENSMUST00000215696.1	5333	ENSMUSG00000038587	Akap12	A kinase (PRKA) anchor protein (gravin) 12
1001	chr10	4353601	4353900	300	0.000170121	Exon (ENSMUST00000045730.6/83397, exon 3 of 4)	83397	ENSMUST00000215696.1	5833	ENSMUSG00000038587	Akap12	A kinase (PRKA) anchor protein (gravin) 12
1002	chr10	4354101	4354200	100	3.26219e-07	Exon (ENSMUST00000045730.6/83397, exon 3 of 4)	83397	ENSMUST00000215696.1	6333	ENSMUSG00000038587	Akap12	A kinase (PRKA) anchor protein (gravin) 12
1003	chr10	4354401	4354600	200	0.00023371	Exon (ENSMUST00000045730.6/83397, exon 3 of 4)	83397	ENSMUST00000215696.1	6633	ENSMUSG00000038587	Akap12	A kinase (PRKA) anchor protein (gravin) 12
1004	chr10	4355001	4355200	200	0.000556571	Exon (ENSMUST00000045730.6/83397, exon 3 of 4)	83397	ENSMUST00000215696.1	7233	ENSMUSG00000038587	Akap12	A kinase (PRKA) anchor protein (gravin) 12
1005	chr10	4355301	4355400	100	0.000736488	Exon (ENSMUST00000045730.6/83397, exon 3 of 4)	83397	ENSMUST00000215696.1	7533	ENSMUSG00000038587	Akap12	A kinase (PRKA) anchor protein (gravin) 12
1006	chr10	4355701	4355800	100	0.000376653	Exon (ENSMUST00000045730.6/83397, exon 3 of 4)	83397	ENSMUST00000215696.1	7933	ENSMUSG00000038587	Akap12	A kinase (PRKA) anchor protein (gravin) 12
1007	chr10	4356001	4356100	100	0.000188117	Exon (ENSMUST00000045730.6/83397, exon 3 of 4)	83397	ENSMUST00000215696.1	8233	ENSMUSG00000038587	Akap12	A kinase (PRKA) anchor protein (gravin) 12
1008	chr10	4356301	4356600	300	0.000372378	Exon (ENSMUST00000045730.6/83397, exon 3 of 4)	83397	ENSMUST00000215696.1	8533	ENSMUSG00000038587	Akap12	A kinase (PRKA) anchor protein (gravin) 12
1009	chr10	4356701	4356800	100	4.29435e-05	Exon (ENSMUST00000045730.6/83397, exon 3 of 4)	83397	ENSMUST00000215696.1	8933	ENSMUSG00000038587	Akap12	A kinase (PRKA) anchor protein (gravin) 12
1010	chr10	4357001	4357100	100	0.000376653	Exon (ENSMUST00000045730.6/83397, exon 3 of 4)	83397	ENSMUST00000215696.1	9233	ENSMUSG00000038587	Akap12	A kinase (PRKA) anchor protein (gravin) 12
1011	chr10	4357201	4357300	100	1.98676e-05	Exon (ENSMUST00000045730.6/83397, exon 3 of 4)	83397	ENSMUST00000215696.1	9433	ENSMUSG00000038587	Akap12	A kinase (PRKA) anchor protein (gravin) 12
1012	chr10	4357501	4357600	100	9.07675e-05	Exon (ENSMUST00000045730.6/83397, exon 3 of 4)	83397	ENSMUST00000215696.1	9733	ENSMUSG00000038587	Akap12	A kinase (PRKA) anchor protein (gravin) 12
1013	chr10	4358501	4358600	100	0.000736488	3' UTR	83397	ENSMUST00000215696.1	10733	ENSMUSG00000038587	Akap12	A kinase (PRKA) anchor protein (gravin) 12
1014	chr10	4389601	4389700	100	0.000736488	Distal Intergenic	381990	ENSMUST00000100078.9	-1493	ENSMUSG00000075327	Zbtb2	zinc finger and BTB domain containing 2
1015	chr10	4395501	4395600	100	0.000376653	Exon (ENSMUST00000178920.1/ENSMUST00000178920.1, exon 1 of 1)	381990	ENSMUST00000100078.9	-7393	ENSMUSG00000075327	Zbtb2	zinc finger and BTB domain containing 2
1016	chr10	5718001	5718100	100	3.26219e-07	Distal Intergenic	22353	ENSMUST00000217331.1	77649	ENSMUSG00000019772	Vip	vasoactive intestinal polypeptide
1017	chr10	5720501	5720700	200	2.14718e-05	Distal Intergenic	22353	ENSMUST00000217331.1	80149	ENSMUSG00000019772	Vip	vasoactive intestinal polypeptide
1018	chr10	5723401	5723500	100	0.000188117	Distal Intergenic	67141	ENSMUST00000142200.1	81100	ENSMUSG00000019773	Fbxo5	F-box protein 5
1019	chr10	5724901	5725000	100	5.07568e-13	Distal Intergenic	67141	ENSMUST00000142200.1	79600	ENSMUSG00000019773	Fbxo5	F-box protein 5
1020	chr10	5725401	5725500	100	0.000376653	Distal Intergenic	67141	ENSMUST00000142200.1	79100	ENSMUSG00000019773	Fbxo5	F-box protein 5
1021	chr10	5725701	5726000	300	9.61464e-06	Distal Intergenic	67141	ENSMUST00000142200.1	78600	ENSMUSG00000019773	Fbxo5	F-box protein 5
1022	chr10	7712501	7712600	100	0.000736488	Exon (ENSMUST00000165952.8/16798, exon 8 of 8)	23924	ENSMUST00000019929.12	-13400	ENSMUSG00000019794	Katna1	katanin p60 (ATPase-containing) subunit A1
1023	chr10	7920001	7920100	100	0.000376653	Exon (ENSMUST00000146444.7/68652, exon 3 of 7)	68652	ENSMUST00000130322.1	4160	ENSMUSG00000015755	Tab2	TGF-beta activated kinase 1/MAP3K7 binding protein 2
1024	chr10	8548801	8549100	300	0.000308202	Distal Intergenic	338362	ENSMUST00000061601.8	-29976	ENSMUSG00000047712	Ust	uronyl-2-sulfotransferase
1025	chr10	8549301	8549400	100	0.000376653	Distal Intergenic	338362	ENSMUST00000061601.8	-30476	ENSMUSG00000047712	Ust	uronyl-2-sulfotransferase
1026	chr10	8549501	8549600	100	0.000736488	Distal Intergenic	338362	ENSMUST00000061601.8	-30676	ENSMUSG00000047712	Ust	uronyl-2-sulfotransferase
1027	chr10	8549701	8549800	100	0.000188117	Distal Intergenic	338362	ENSMUST00000061601.8	-30876	ENSMUSG00000047712	Ust	uronyl-2-sulfotransferase
1028	chr10	8550101	8550300	200	1.99581e-06	Distal Intergenic	338362	ENSMUST00000061601.8	-31276	ENSMUSG00000047712	Ust	uronyl-2-sulfotransferase
1029	chr10	12796001	12796100	100	0.000376653	Intron (ENSMUST00000076817.4/22288, intron 1 of 73)	22288	ENSMUST00000219163.1	17474	ENSMUSG00000019820	Utrn	utrophin
1030	chr10	12831101	12831200	100	0.000736488	Intron (ENSMUST00000076817.4/22288, intron 1 of 73)	22288	ENSMUST00000219130.1	-4163	ENSMUSG00000019820	Utrn	utrophin
1031	chr10	12836001	12836100	100	0.000376653	Intron (ENSMUST00000076817.4/22288, intron 1 of 73)	22288	ENSMUST00000219130.1	-9063	ENSMUSG00000019820	Utrn	utrophin
1032	chr10	14523001	14523100	100	5.23872e-15	Exon (ENSMUST00000096020.6/ENSMUST00000096020.6, exon 1 of 1)	215798	ENSMUST00000207953.1	21895	ENSMUSG00000039116	Adgrg6	adhesion G protein-coupled receptor G6
1033	chr10	14523301	14523400	100	5.23872e-15	Exon (ENSMUST00000096020.6/ENSMUST00000096020.6, exon 1 of 1)	215798	ENSMUST00000207953.1	21595	ENSMUSG00000039116	Adgrg6	adhesion G protein-coupled receptor G6
1034	chr10	14745301	14745400	100	5.23872e-15	Exon (ENSMUST00000177767.2/ENSMUST00000177767.2, exon 1 of 1)	18101	ENSMUST00000020015.9	-14757	ENSMUSG00000019865	Nmbr	neuromedin B receptor
1035	chr10	14745701	14745800	100	0.000736488	Exon (ENSMUST00000177767.2/ENSMUST00000177767.2, exon 1 of 1)	18101	ENSMUST00000020015.9	-14357	ENSMUSG00000019865	Nmbr	neuromedin B receptor
1036	chr10	17723201	17723300	100	0.000376653	Promoter	17684	ENSMUST00000038107.8	0	ENSMUSG00000039910	Cited2	Cbp/p300-interacting transactivator, with Glu/Asp-rich carboxy-terminal domain, 2
1037	chr10	17725101	17725200	100	0.000376653	3' UTR	17684	ENSMUST00000218370.1	1859	ENSMUSG00000039910	Cited2	Cbp/p300-interacting transactivator, with Glu/Asp-rich carboxy-terminal domain, 2
1038	chr10	18055901	18056000	100	0.000376653	Promoter	19707	ENSMUST00000155284.7	0	ENSMUSG00000019854	Reps1	RalBP1 associated Eps domain containing protein
1039	chr10	18845101	18845200	100	1.74653e-09	5' UTR	64058	ENSMUST00000019998.8	81	ENSMUSG00000019851	Perp	PERP, TP53 apoptosis effector
1040	chr10	18855601	18855800	200	0.000192815	Exon (ENSMUST00000019998.8/64058, exon 3 of 3)	64058	ENSMUST00000019998.8	10581	ENSMUSG00000019851	Perp	PERP, TP53 apoptosis effector
1041	chr10	18856101	18856200	100	9.07675e-05	3' UTR	64058	ENSMUST00000019998.8	11081	ENSMUSG00000019851	Perp	PERP, TP53 apoptosis effector
1042	chr10	18856401	18856700	300	3.5804e-06	3' UTR	64058	ENSMUST00000019998.8	11381	ENSMUSG00000019851	Perp	PERP, TP53 apoptosis effector
1043	chr10	18856801	18856900	100	4.29435e-05	3' UTR	64058	ENSMUST00000019998.8	11781	ENSMUSG00000019851	Perp	PERP, TP53 apoptosis effector
1044	chr10	19004801	19004900	100	0.000376653	Exon (ENSMUST00000019997.10/21929, exon 7 of 9)	21929	ENSMUST00000154749.1	3945	ENSMUSG00000019850	Tnfaip3	tumor necrosis factor, alpha-induced protein 3
1045	chr10	19876601	19876700	100	9.07675e-05	Intron (ENSMUST00000020182.15/18634, intron 8 of 9)	18634	ENSMUST00000125942.1	-6927	ENSMUSG00000020003	Pex7	peroxisomal biogenesis factor 7
1046	chr10	19934701	19934900	200	0.000378178	Exon (ENSMUST00000095806.9/26408, exon 1 of 30)	26408	ENSMUST00000120259.7	175	ENSMUSG00000071369	Map3k5	mitogen-activated protein kinase kinase kinase 5
1047	chr10	19949401	19949600	200	0.000736488	Intron (ENSMUST00000095806.9/26408, intron 1 of 29)	26408	ENSMUST00000152533.1	-1455	ENSMUSG00000071369	Map3k5	mitogen-activated protein kinase kinase kinase 5
1048	chr10	19961201	19961300	100	0.000376653	Intron (ENSMUST00000095806.9/26408, intron 1 of 29)	26408	ENSMUST00000152533.1	10146	ENSMUSG00000071369	Map3k5	mitogen-activated protein kinase kinase kinase 5
1049	chr10	20003701	20003800	100	0.000376653	Intron (ENSMUST00000095806.9/26408, intron 2 of 29)	26408	ENSMUST00000152533.1	52646	ENSMUSG00000071369	Map3k5	mitogen-activated protein kinase kinase kinase 5
1050	chr10	20020601	20020700	100	4.29435e-05	Intron (ENSMUST00000095806.9/26408, intron 3 of 29)	26408	ENSMUST00000152533.1	69546	ENSMUSG00000071369	Map3k5	mitogen-activated protein kinase kinase kinase 5
1051	chr10	20021001	20021100	100	0.000736488	Intron (ENSMUST00000095806.9/26408, intron 3 of 29)	26408	ENSMUST00000152533.1	69946	ENSMUSG00000071369	Map3k5	mitogen-activated protein kinase kinase kinase 5
1052	chr10	20021401	20021500	100	0.000736488	Intron (ENSMUST00000095806.9/26408, intron 3 of 29)	26408	ENSMUST00000152533.1	70346	ENSMUSG00000071369	Map3k5	mitogen-activated protein kinase kinase kinase 5
1053	chr10	20021601	20021700	100	9.07675e-05	Intron (ENSMUST00000095806.9/26408, intron 3 of 29)	26408	ENSMUST00000152533.1	70546	ENSMUSG00000071369	Map3k5	mitogen-activated protein kinase kinase kinase 5
1054	chr10	20021801	20021900	100	0.000736488	Intron (ENSMUST00000095806.9/26408, intron 3 of 29)	26408	ENSMUST00000152533.1	70746	ENSMUSG00000071369	Map3k5	mitogen-activated protein kinase kinase kinase 5
1055	chr10	20022801	20022900	100	0.000188117	Intron (ENSMUST00000095806.9/26408, intron 3 of 29)	26408	ENSMUST00000152533.1	71746	ENSMUSG00000071369	Map3k5	mitogen-activated protein kinase kinase kinase 5
1056	chr10	20023601	20023700	100	8.97631e-06	Exon (ENSMUST00000095806.9/26408, exon 4 of 30)	26408	ENSMUST00000152533.1	72546	ENSMUSG00000071369	Map3k5	mitogen-activated protein kinase kinase kinase 5
1057	chr10	20069201	20069300	100	0.000736488	Intron (ENSMUST00000095806.9/26408, intron 11 of 29)	26408	ENSMUST00000138994.1	-30225	ENSMUSG00000071369	Map3k5	mitogen-activated protein kinase kinase kinase 5
1058	chr10	20109601	20109700	100	0.000376653	Intron (ENSMUST00000095806.9/26408, intron 19 of 29)	26408	ENSMUST00000138994.1	10076	ENSMUSG00000071369	Map3k5	mitogen-activated protein kinase kinase kinase 5
1059	chr10	20113301	20113400	100	0.000736488	Intron (ENSMUST00000095806.9/26408, intron 21 of 29)	26408	ENSMUST00000156369.1	-11401	ENSMUSG00000071369	Map3k5	mitogen-activated protein kinase kinase kinase 5
1060	chr10	20114101	20114200	100	0.000736488	Intron (ENSMUST00000095806.9/26408, intron 21 of 29)	26408	ENSMUST00000156369.1	-10601	ENSMUSG00000071369	Map3k5	mitogen-activated protein kinase kinase kinase 5
1061	chr10	20115701	20115800	100	0.000736488	Intron (ENSMUST00000095806.9/26408, intron 21 of 29)	26408	ENSMUST00000156369.1	-9001	ENSMUSG00000071369	Map3k5	mitogen-activated protein kinase kinase kinase 5
1062	chr10	20117501	20117600	100	0.000736488	Intron (ENSMUST00000095806.9/26408, intron 21 of 29)	26408	ENSMUST00000156369.1	-7201	ENSMUSG00000071369	Map3k5	mitogen-activated protein kinase kinase kinase 5
1063	chr10	20131901	20132100	200	0.000413628	Exon (ENSMUST00000095806.9/26408, exon 26 of 30)	26408	ENSMUST00000156369.1	7100	ENSMUSG00000071369	Map3k5	mitogen-activated protein kinase kinase kinase 5
1064	chr10	20148401	20148500	100	0.000736488	Promoter	17761	ENSMUST00000020173.15	0	ENSMUSG00000019996	Map7	microtubule-associated protein 7
1065	chr10	20323001	20323200	200	4.51753e-06	Exon (ENSMUST00000092678.9/72567, exon 4 of 12)	72567	ENSMUST00000191438.1	-520	ENSMUSG00000037608	Bclaf1	BCL2-associated transcription factor 1
1066	chr10	20323301	20323500	200	9.42215e-05	Exon (ENSMUST00000092678.9/72567, exon 4 of 12)	72567	ENSMUST00000191438.1	-220	ENSMUSG00000037608	Bclaf1	BCL2-associated transcription factor 1
1067	chr10	20325201	20325300	100	7.60547e-07	Exon (ENSMUST00000092678.9/72567, exon 5 of 12)	72567	ENSMUST00000189158.1	-745	ENSMUSG00000037608	Bclaf1	BCL2-associated transcription factor 1
1068	chr10	20325401	20325700	300	0.000107276	Exon (ENSMUST00000092678.9/72567, exon 5 of 12)	72567	ENSMUST00000189158.1	-345	ENSMUSG00000037608	Bclaf1	BCL2-associated transcription factor 1
1069	chr10	20327101	20327200	100	0.000736488	Exon (ENSMUST00000189158.1/72567, exon 2 of 5)	72567	ENSMUST00000189158.1	1056	ENSMUSG00000037608	Bclaf1	BCL2-associated transcription factor 1
1070	chr10	20328401	20328500	100	0.000376653	Intron (ENSMUST00000092678.9/72567, intron 7 of 11)	72567	ENSMUST00000191143.1	-549	ENSMUSG00000037608	Bclaf1	BCL2-associated transcription factor 1
1071	chr10	20330001	20330100	100	4.29435e-05	Intron (ENSMUST00000092678.9/72567, intron 8 of 11)	72567	ENSMUST00000191143.1	952	ENSMUSG00000037608	Bclaf1	BCL2-associated transcription factor 1
1072	chr10	20332501	20332600	100	0.000736488	3' UTR	72567	ENSMUST00000188546.1	-654	ENSMUSG00000037608	Bclaf1	BCL2-associated transcription factor 1
1073	chr10	20332901	20333100	200	5.53176e-05	Exon (ENSMUST00000191143.1/72567, exon 2 of 2)	72567	ENSMUST00000188546.1	-154	ENSMUSG00000037608	Bclaf1	BCL2-associated transcription factor 1
1074	chr10	21341701	21341800	100	0.000376653	Exon (ENSMUST00000020153.9/56422, exon 6 of 18)	73990	ENSMUST00000218108.1	257	ENSMUSG00000112654	4930455C13Rik	RIKEN cDNA 4930455C13 gene
1075	chr10	21724301	21724500	200	0.000139442	Distal Intergenic	432436	ENSMUST00000071008.5	33456	ENSMUSG00000056716	Gm5420	predicted gene 5420
1076	chr10	21724801	21724900	100	0.000376653	Distal Intergenic	432436	ENSMUST00000071008.5	33956	ENSMUSG00000056716	Gm5420	predicted gene 5420
1077	chr10	21725301	21725400	100	0.000376653	Distal Intergenic	432436	ENSMUST00000071008.5	34456	ENSMUSG00000056716	Gm5420	predicted gene 5420
1078	chr10	21725601	21725900	300	0.000306008	Distal Intergenic	432436	ENSMUST00000071008.5	34756	ENSMUSG00000056716	Gm5420	predicted gene 5420
1079	chr10	21727001	21727100	100	0.000736488	Distal Intergenic	432436	ENSMUST00000071008.5	36156	ENSMUSG00000056716	Gm5420	predicted gene 5420
1080	chr10	21728101	21728200	100	0.000188117	Distal Intergenic	432436	ENSMUST00000071008.5	37256	ENSMUSG00000056716	Gm5420	predicted gene 5420
1081	chr10	21728501	21728600	100	0.000376653	Distal Intergenic	432436	ENSMUST00000071008.5	37656	ENSMUSG00000056716	Gm5420	predicted gene 5420
1082	chr10	21730001	21730100	100	1.98676e-05	Distal Intergenic	432436	ENSMUST00000071008.5	39156	ENSMUSG00000056716	Gm5420	predicted gene 5420
1083	chr10	21730701	21730900	200	0.000389716	Distal Intergenic	432436	ENSMUST00000071008.5	39856	ENSMUSG00000056716	Gm5420	predicted gene 5420
1084	chr10	21731001	21731100	100	0.000736488	Distal Intergenic	432436	ENSMUST00000071008.5	40156	ENSMUSG00000056716	Gm5420	predicted gene 5420
1085	chr10	21731201	21731300	100	0.000188117	Distal Intergenic	432436	ENSMUST00000071008.5	40356	ENSMUSG00000056716	Gm5420	predicted gene 5420
1086	chr10	21731601	21731700	100	0.000736488	Distal Intergenic	432436	ENSMUST00000071008.5	40756	ENSMUSG00000056716	Gm5420	predicted gene 5420
1087	chr10	21732401	21732500	100	0.000188117	Distal Intergenic	432436	ENSMUST00000071008.5	41556	ENSMUSG00000056716	Gm5420	predicted gene 5420
1088	chr10	21732901	21733000	100	0.000736488	Distal Intergenic	432436	ENSMUST00000071008.5	42056	ENSMUSG00000056716	Gm5420	predicted gene 5420
1089	chr10	21733201	21733300	100	0.000188117	Distal Intergenic	432436	ENSMUST00000071008.5	42356	ENSMUSG00000056716	Gm5420	predicted gene 5420
1090	chr10	21733501	21734100	600	0.000280559	Distal Intergenic	432436	ENSMUST00000071008.5	42656	ENSMUSG00000056716	Gm5420	predicted gene 5420
1091	chr10	21734201	21734300	100	1.98676e-05	Distal Intergenic	432436	ENSMUST00000071008.5	43356	ENSMUSG00000056716	Gm5420	predicted gene 5420
1092	chr10	21734601	21734700	100	9.07675e-05	Distal Intergenic	432436	ENSMUST00000071008.5	43756	ENSMUSG00000056716	Gm5420	predicted gene 5420
1093	chr10	21734801	21734900	100	9.07675e-05	Distal Intergenic	432436	ENSMUST00000071008.5	43956	ENSMUSG00000056716	Gm5420	predicted gene 5420
1094	chr10	21735001	21735100	100	1.75465e-06	Distal Intergenic	432436	ENSMUST00000071008.5	44156	ENSMUSG00000056716	Gm5420	predicted gene 5420
1095	chr10	21735601	21735900	300	1.17118e-06	Distal Intergenic	432436	ENSMUST00000071008.5	44756	ENSMUSG00000056716	Gm5420	predicted gene 5420
1096	chr10	21736101	21736300	200	4.54531e-05	Distal Intergenic	432436	ENSMUST00000071008.5	45256	ENSMUSG00000056716	Gm5420	predicted gene 5420
1097	chr10	21736401	21736500	100	8.97631e-06	Distal Intergenic	432436	ENSMUST00000071008.5	45556	ENSMUSG00000056716	Gm5420	predicted gene 5420
1098	chr10	21736601	21737300	700	6.35447e-05	Distal Intergenic	432436	ENSMUST00000071008.5	45756	ENSMUSG00000056716	Gm5420	predicted gene 5420
1099	chr10	21737501	21738200	700	6.13215e-05	Distal Intergenic	432436	ENSMUST00000071008.5	46656	ENSMUSG00000056716	Gm5420	predicted gene 5420
1100	chr10	21738301	21738600	300	0.000246089	Distal Intergenic	432436	ENSMUST00000071008.5	47456	ENSMUSG00000056716	Gm5420	predicted gene 5420
1101	chr10	21738701	21739300	600	0.000157486	Distal Intergenic	432436	ENSMUST00000071008.5	47856	ENSMUSG00000056716	Gm5420	predicted gene 5420
1102	chr10	21739401	21739500	100	0.000188117	Distal Intergenic	432436	ENSMUST00000071008.5	48556	ENSMUSG00000056716	Gm5420	predicted gene 5420
1103	chr10	21739701	21739900	200	0.000368624	Distal Intergenic	432436	ENSMUST00000071008.5	48856	ENSMUSG00000056716	Gm5420	predicted gene 5420
1104	chr10	21740101	21740200	100	3.99162e-06	Distal Intergenic	432436	ENSMUST00000071008.5	49256	ENSMUSG00000056716	Gm5420	predicted gene 5420
1105	chr10	21740301	21740500	200	6.68555e-05	Distal Intergenic	432436	ENSMUST00000071008.5	49456	ENSMUSG00000056716	Gm5420	predicted gene 5420
1106	chr10	21740601	21740700	100	0.000188117	Distal Intergenic	432436	ENSMUST00000071008.5	49756	ENSMUSG00000056716	Gm5420	predicted gene 5420
1107	chr10	21740901	21741000	100	9.07675e-05	Distal Intergenic	432436	ENSMUST00000071008.5	50056	ENSMUSG00000056716	Gm5420	predicted gene 5420
1108	chr10	21741101	21741200	100	0.000736488	Distal Intergenic	432436	ENSMUST00000071008.5	50256	ENSMUSG00000056716	Gm5420	predicted gene 5420
1109	chr10	21741301	21741400	100	0.000736488	Distal Intergenic	432436	ENSMUST00000071008.5	50456	ENSMUSG00000056716	Gm5420	predicted gene 5420
1110	chr10	21741501	21741600	100	3.26219e-07	Distal Intergenic	432436	ENSMUST00000071008.5	50656	ENSMUSG00000056716	Gm5420	predicted gene 5420
1111	chr10	21742001	21742200	200	4.49582e-07	Distal Intergenic	432436	ENSMUST00000071008.5	51156	ENSMUSG00000056716	Gm5420	predicted gene 5420
1112	chr10	21742301	21743000	700	0.000212495	Distal Intergenic	432436	ENSMUST00000071008.5	51456	ENSMUSG00000056716	Gm5420	predicted gene 5420
1113	chr10	21743101	21743200	100	2.4663e-08	Distal Intergenic	432436	ENSMUST00000071008.5	52256	ENSMUSG00000056716	Gm5420	predicted gene 5420
1114	chr10	21743301	21743900	600	7.80318e-05	Exon (ENSMUST00000189792.1/ENSMUST00000189792.1, exon 1 of 2)	432436	ENSMUST00000071008.5	52456	ENSMUSG00000056716	Gm5420	predicted gene 5420
1115	chr10	21744301	21744900	600	4.72958e-05	Intron (ENSMUST00000189792.1/ENSMUST00000189792.1, intron 1 of 1)	432436	ENSMUST00000071008.5	53456	ENSMUSG00000056716	Gm5420	predicted gene 5420
1116	chr10	21745101	21745200	100	0.000376653	Intron (ENSMUST00000189792.1/ENSMUST00000189792.1, intron 1 of 1)	432436	ENSMUST00000071008.5	54256	ENSMUSG00000056716	Gm5420	predicted gene 5420
1117	chr10	21745301	21745800	500	4.80191e-05	Intron (ENSMUST00000189792.1/ENSMUST00000189792.1, intron 1 of 1)	432436	ENSMUST00000071008.5	54456	ENSMUSG00000056716	Gm5420	predicted gene 5420
1118	chr10	21745901	21746300	400	5.77687e-05	Intron (ENSMUST00000189792.1/ENSMUST00000189792.1, intron 1 of 1)	432436	ENSMUST00000071008.5	55056	ENSMUSG00000056716	Gm5420	predicted gene 5420
1119	chr10	21746401	21747000	600	0.000155607	Exon (ENSMUST00000189792.1/ENSMUST00000189792.1, exon 2 of 2)	432436	ENSMUST00000071008.5	55556	ENSMUSG00000056716	Gm5420	predicted gene 5420
1120	chr10	21747101	21747200	100	3.26219e-07	Distal Intergenic	432436	ENSMUST00000071008.5	56256	ENSMUSG00000056716	Gm5420	predicted gene 5420
1121	chr10	21747601	21747700	100	4.29435e-05	Distal Intergenic	432436	ENSMUST00000071008.5	56756	ENSMUSG00000056716	Gm5420	predicted gene 5420
1122	chr10	21747901	21748300	400	2.14729e-05	Distal Intergenic	432436	ENSMUST00000071008.5	57056	ENSMUSG00000056716	Gm5420	predicted gene 5420
1123	chr10	21748401	21748600	200	9.40605e-05	Distal Intergenic	432436	ENSMUST00000071008.5	57556	ENSMUSG00000056716	Gm5420	predicted gene 5420
1124	chr10	21748701	21749100	400	0.000191772	Distal Intergenic	432436	ENSMUST00000071008.5	57856	ENSMUSG00000056716	Gm5420	predicted gene 5420
1125	chr10	21749401	21749500	100	0.000376653	Distal Intergenic	432436	ENSMUST00000071008.5	58556	ENSMUSG00000056716	Gm5420	predicted gene 5420
1126	chr10	21749601	21749800	200	0.000413628	Distal Intergenic	432436	ENSMUST00000071008.5	58756	ENSMUSG00000056716	Gm5420	predicted gene 5420
1127	chr10	21749901	21750900	1000	0.000113838	Distal Intergenic	432436	ENSMUST00000071008.5	59056	ENSMUSG00000056716	Gm5420	predicted gene 5420
1128	chr10	21751001	21752400	1400	0.000121383	Distal Intergenic	432436	ENSMUST00000071008.5	60156	ENSMUSG00000056716	Gm5420	predicted gene 5420
1129	chr10	21752501	21753400	900	3.91052e-06	Distal Intergenic	432436	ENSMUST00000071008.5	61656	ENSMUSG00000056716	Gm5420	predicted gene 5420
1130	chr10	21753901	21756500	2600	4.61767e-05	Distal Intergenic	432436	ENSMUST00000071008.5	63056	ENSMUSG00000056716	Gm5420	predicted gene 5420
1131	chr10	21756601	21756900	300	1.33397e-06	Distal Intergenic	432436	ENSMUST00000071008.5	65756	ENSMUSG00000056716	Gm5420	predicted gene 5420
1132	chr10	21757001	21757300	300	6.63737e-08	Distal Intergenic	432436	ENSMUST00000071008.5	66156	ENSMUSG00000056716	Gm5420	predicted gene 5420
1133	chr10	21757501	21758300	800	0.000120952	Distal Intergenic	432436	ENSMUST00000071008.5	66656	ENSMUSG00000056716	Gm5420	predicted gene 5420
1134	chr10	21758401	21758500	100	1.98676e-05	Distal Intergenic	432436	ENSMUST00000071008.5	67556	ENSMUSG00000056716	Gm5420	predicted gene 5420
1135	chr10	21758601	21758700	100	2.4663e-08	Distal Intergenic	432436	ENSMUST00000071008.5	67756	ENSMUSG00000056716	Gm5420	predicted gene 5420
1136	chr10	21758801	21758900	100	9.07675e-05	Distal Intergenic	432436	ENSMUST00000071008.5	67956	ENSMUSG00000056716	Gm5420	predicted gene 5420
1137	chr10	21759001	21761000	2000	0.000101583	Distal Intergenic	432436	ENSMUST00000071008.5	68156	ENSMUSG00000056716	Gm5420	predicted gene 5420
1138	chr10	21761201	21761400	200	1.08111e-05	Distal Intergenic	432436	ENSMUST00000071008.5	70356	ENSMUSG00000056716	Gm5420	predicted gene 5420
1139	chr10	21761501	21761600	100	1.93694e-11	Distal Intergenic	432436	ENSMUST00000071008.5	70656	ENSMUSG00000056716	Gm5420	predicted gene 5420
1140	chr10	21761701	21761900	200	0.000368257	Distal Intergenic	432436	ENSMUST00000071008.5	70856	ENSMUSG00000056716	Gm5420	predicted gene 5420
1141	chr10	21762101	21763200	1100	2.68808e-05	Distal Intergenic	432436	ENSMUST00000071008.5	71256	ENSMUSG00000056716	Gm5420	predicted gene 5420
1142	chr10	21763301	21763500	200	2.39032e-11	Distal Intergenic	432436	ENSMUST00000071008.5	72456	ENSMUSG00000056716	Gm5420	predicted gene 5420
1143	chr10	21763801	21764200	400	0.00039318	Distal Intergenic	432436	ENSMUST00000071008.5	72956	ENSMUSG00000056716	Gm5420	predicted gene 5420
1144	chr10	21764301	21764400	100	0.000188117	Distal Intergenic	432436	ENSMUST00000071008.5	73456	ENSMUSG00000056716	Gm5420	predicted gene 5420
1145	chr10	21764901	21765000	100	0.000188117	Distal Intergenic	432436	ENSMUST00000071008.5	74056	ENSMUSG00000056716	Gm5420	predicted gene 5420
1146	chr10	21765101	21765300	200	2.34676e-05	Distal Intergenic	432436	ENSMUST00000071008.5	74256	ENSMUSG00000056716	Gm5420	predicted gene 5420
1147	chr10	21765501	21765600	100	1.98676e-05	Distal Intergenic	432436	ENSMUST00000071008.5	74656	ENSMUSG00000056716	Gm5420	predicted gene 5420
1148	chr10	21765901	21766000	100	0.000736488	Distal Intergenic	432436	ENSMUST00000071008.5	75056	ENSMUSG00000056716	Gm5420	predicted gene 5420
1149	chr10	21766601	21766700	100	9.07675e-05	Distal Intergenic	432436	ENSMUST00000071008.5	75756	ENSMUSG00000056716	Gm5420	predicted gene 5420
1150	chr10	21766901	21767000	100	0.000376653	Distal Intergenic	432436	ENSMUST00000071008.5	76056	ENSMUSG00000056716	Gm5420	predicted gene 5420
1151	chr10	21767101	21767200	100	1.38616e-07	Distal Intergenic	432436	ENSMUST00000071008.5	76256	ENSMUSG00000056716	Gm5420	predicted gene 5420
1152	chr10	21767701	21767800	100	1.74653e-09	Distal Intergenic	432436	ENSMUST00000071008.5	76856	ENSMUSG00000056716	Gm5420	predicted gene 5420
1153	chr10	21767901	21768000	100	7.60547e-07	Distal Intergenic	432436	ENSMUST00000071008.5	77056	ENSMUSG00000056716	Gm5420	predicted gene 5420
1154	chr10	21768101	21768300	200	0.000368407	Distal Intergenic	432436	ENSMUST00000071008.5	77256	ENSMUSG00000056716	Gm5420	predicted gene 5420
1155	chr10	21769301	21769400	100	0.000736488	Distal Intergenic	432436	ENSMUST00000071008.5	78456	ENSMUSG00000056716	Gm5420	predicted gene 5420
1156	chr10	21770801	21770900	100	0.000376653	Distal Intergenic	432436	ENSMUST00000071008.5	79956	ENSMUSG00000056716	Gm5420	predicted gene 5420
1157	chr10	21772801	21772900	100	1.38616e-07	Distal Intergenic	432436	ENSMUST00000071008.5	81956	ENSMUSG00000056716	Gm5420	predicted gene 5420
1158	chr10	21773101	21773200	100	0.000736488	Distal Intergenic	432436	ENSMUST00000071008.5	82256	ENSMUSG00000056716	Gm5420	predicted gene 5420
1159	chr10	21773301	21773700	400	2.421e-05	Distal Intergenic	432436	ENSMUST00000071008.5	82456	ENSMUSG00000056716	Gm5420	predicted gene 5420
1160	chr10	21774301	21774400	100	9.07675e-05	Distal Intergenic	432436	ENSMUST00000071008.5	83456	ENSMUSG00000056716	Gm5420	predicted gene 5420
1161	chr10	21774501	21774600	100	1.18034e-10	Distal Intergenic	432436	ENSMUST00000071008.5	83656	ENSMUSG00000056716	Gm5420	predicted gene 5420
1162	chr10	21774701	21774800	100	3.99162e-06	Distal Intergenic	432436	ENSMUST00000071008.5	83856	ENSMUSG00000056716	Gm5420	predicted gene 5420
1163	chr10	21775401	21775700	300	0.000277082	Distal Intergenic	432436	ENSMUST00000071008.5	84556	ENSMUSG00000056716	Gm5420	predicted gene 5420
1164	chr10	21776101	21776400	300	8.36426e-05	Distal Intergenic	432436	ENSMUST00000071008.5	85256	ENSMUSG00000056716	Gm5420	predicted gene 5420
1165	chr10	21776501	21776600	100	1.98676e-05	Distal Intergenic	432436	ENSMUST00000071008.5	85656	ENSMUSG00000056716	Gm5420	predicted gene 5420
1166	chr10	21776701	21776800	100	1.38616e-07	Distal Intergenic	432436	ENSMUST00000071008.5	85856	ENSMUSG00000056716	Gm5420	predicted gene 5420
1167	chr10	21777101	21777300	200	0.000282385	Distal Intergenic	432436	ENSMUST00000071008.5	86256	ENSMUSG00000056716	Gm5420	predicted gene 5420
1168	chr10	21777501	21777600	100	9.07675e-05	Distal Intergenic	432436	ENSMUST00000071008.5	86656	ENSMUSG00000056716	Gm5420	predicted gene 5420
1169	chr10	21778101	21778200	100	0.000188117	Distal Intergenic	432436	ENSMUST00000071008.5	87256	ENSMUSG00000056716	Gm5420	predicted gene 5420
1170	chr10	21779501	21779900	400	0.00033605	Distal Intergenic	432436	ENSMUST00000071008.5	88656	ENSMUSG00000056716	Gm5420	predicted gene 5420
1171	chr10	21780201	21780400	200	9.42215e-05	Distal Intergenic	432436	ENSMUST00000071008.5	89356	ENSMUSG00000056716	Gm5420	predicted gene 5420
1172	chr10	21780501	21780600	100	9.07675e-05	Distal Intergenic	432436	ENSMUST00000071008.5	89656	ENSMUSG00000056716	Gm5420	predicted gene 5420
1173	chr10	21780801	21781900	1100	0.000115943	Distal Intergenic	432436	ENSMUST00000071008.5	89956	ENSMUSG00000056716	Gm5420	predicted gene 5420
1174	chr10	21782101	21782500	400	0.000118292	Distal Intergenic	432436	ENSMUST00000071008.5	91256	ENSMUSG00000056716	Gm5420	predicted gene 5420
1175	chr10	21782901	21783300	400	1.4168e-05	Distal Intergenic	432436	ENSMUST00000071008.5	92056	ENSMUSG00000056716	Gm5420	predicted gene 5420
1176	chr10	21783401	21783600	200	4.54531e-05	Distal Intergenic	432436	ENSMUST00000071008.5	92556	ENSMUSG00000056716	Gm5420	predicted gene 5420
1177	chr10	21783901	21784100	200	2.14841e-05	Distal Intergenic	432436	ENSMUST00000071008.5	93056	ENSMUSG00000056716	Gm5420	predicted gene 5420
1178	chr10	21784501	21784600	100	0.000188117	Distal Intergenic	432436	ENSMUST00000071008.5	93656	ENSMUSG00000056716	Gm5420	predicted gene 5420
1179	chr10	21784901	21785400	500	0.000147333	Distal Intergenic	432436	ENSMUST00000071008.5	94056	ENSMUSG00000056716	Gm5420	predicted gene 5420
1180	chr10	21785501	21785600	100	9.07675e-05	Distal Intergenic	432436	ENSMUST00000071008.5	94656	ENSMUSG00000056716	Gm5420	predicted gene 5420
1181	chr10	21993001	21993100	100	0.000736488	Intron (ENSMUST00000120509.7/20393, intron 3 of 13)	20393	ENSMUST00000100036.9	778	ENSMUSG00000019970	Sgk1	serum/glucocorticoid regulated kinase 1
1182	chr10	21994201	21994300	100	3.99162e-06	Intron (ENSMUST00000120509.7/20393, intron 3 of 13)	20393	ENSMUST00000092673.10	311	ENSMUSG00000019970	Sgk1	serum/glucocorticoid regulated kinase 1
1183	chr10	21994701	21995200	500	0.000294595	Promoter	20393	ENSMUST00000126560.1	0	ENSMUSG00000019970	Sgk1	serum/glucocorticoid regulated kinase 1
1184	chr10	21995501	21995700	200	0.000368624	Exon (ENSMUST00000120509.7/20393, exon 5 of 14)	20393	ENSMUST00000124350.1	591	ENSMUSG00000019970	Sgk1	serum/glucocorticoid regulated kinase 1
1185	chr10	21995801	21995900	100	7.60547e-07	Exon (ENSMUST00000120509.7/20393, exon 6 of 14)	20393	ENSMUST00000135195.1	-691	ENSMUSG00000019970	Sgk1	serum/glucocorticoid regulated kinase 1
1186	chr10	21996001	21996200	200	0.000192815	Exon (ENSMUST00000120509.7/20393, exon 7 of 14)	20393	ENSMUST00000135195.1	-391	ENSMUSG00000019970	Sgk1	serum/glucocorticoid regulated kinase 1
1187	chr10	21996301	21996800	500	0.000148161	Promoter	20393	ENSMUST00000135195.1	0	ENSMUSG00000019970	Sgk1	serum/glucocorticoid regulated kinase 1
1188	chr10	21996901	21997700	800	1.66311e-06	Exon (ENSMUST00000120509.7/20393, exon 10 of 14)	20393	ENSMUST00000135195.1	310	ENSMUSG00000019970	Sgk1	serum/glucocorticoid regulated kinase 1
1189	chr10	21997801	21998000	200	9.96319e-06	Exon (ENSMUST00000120509.7/20393, exon 12 of 14)	20393	ENSMUST00000135195.1	1210	ENSMUSG00000019970	Sgk1	serum/glucocorticoid regulated kinase 1
1190	chr10	21998201	21999700	1500	2.77276e-07	3' UTR	20393	ENSMUST00000135195.1	1610	ENSMUSG00000019970	Sgk1	serum/glucocorticoid regulated kinase 1
1191	chr10	21999901	22000100	200	2.15011e-05	3' UTR	20393	ENSMUST00000135195.1	3310	ENSMUSG00000019970	Sgk1	serum/glucocorticoid regulated kinase 1
1192	chr10	22000301	22000500	200	0.000282385	Distal Intergenic	20393	ENSMUST00000135195.1	3710	ENSMUSG00000019970	Sgk1	serum/glucocorticoid regulated kinase 1
1193	chr10	22224401	22224500	100	0.000188117	Intron (ENSMUST00000105522.8/667281, intron 1 of 5)	667281	ENSMUST00000131558.1	-48846	ENSMUSG00000075297	H60b	histocompatibility 60b
1194	chr10	22225801	22225900	100	0.000376653	Intron (ENSMUST00000105522.8/667281, intron 1 of 5)	667281	ENSMUST00000131558.1	-47446	ENSMUSG00000075297	H60b	histocompatibility 60b
1195	chr10	22254001	22254100	100	0.000736488	Intron (ENSMUST00000105522.8/667281, intron 1 of 5)	667281	ENSMUST00000131558.1	-19246	ENSMUSG00000075297	H60b	histocompatibility 60b
1196	chr10	22312301	22312400	100	9.07675e-05	Exon (ENSMUST00000181223.7/606736, exon 3 of 3)	606736	ENSMUST00000181733.1	5093	NA	C920009B18Rik	RIKEN cDNA C920009B18 gene
1197	chr10	22723901	22724000	100	0.000736488	Intron (ENSMUST00000127698.7/237336, intron 1 of 6)	102465768	ENSMUST00000183950.1	5432	ENSMUSG00000098714	Mir7663	microRNA 7663
1198	chr10	22735101	22735200	100	4.29435e-05	Distal Intergenic	237336	ENSMUST00000095794.3	-3163	ENSMUSG00000071359	Tbpl1	TATA box binding protein-like 1
1199	chr10	22735501	22735600	100	0.000736488	Distal Intergenic	237336	ENSMUST00000095794.3	-3563	ENSMUSG00000071359	Tbpl1	TATA box binding protein-like 1
1200	chr10	22736201	22736300	100	0.000188117	Distal Intergenic	237336	ENSMUST00000095794.3	-4263	ENSMUSG00000071359	Tbpl1	TATA box binding protein-like 1
1201	chr10	22738501	22738600	100	4.29435e-05	Distal Intergenic	237336	ENSMUST00000095794.3	-6563	ENSMUSG00000071359	Tbpl1	TATA box binding protein-like 1
1202	chr10	22739701	22739900	200	0.000462303	Distal Intergenic	237336	ENSMUST00000095794.3	-7763	ENSMUSG00000071359	Tbpl1	TATA box binding protein-like 1
1203	chr10	22740401	22740500	100	0.000376653	Distal Intergenic	237336	ENSMUST00000095794.3	-8463	ENSMUSG00000071359	Tbpl1	TATA box binding protein-like 1
1204	chr10	22740801	22741700	900	6.57993e-15	Distal Intergenic	237336	ENSMUST00000095794.3	-8863	ENSMUSG00000071359	Tbpl1	TATA box binding protein-like 1
1205	chr10	22741901	22742300	400	1.07359e-05	Distal Intergenic	237336	ENSMUST00000095794.3	-9963	ENSMUSG00000071359	Tbpl1	TATA box binding protein-like 1
1206	chr10	23786101	23786200	100	0.000188117	Exon (ENSMUST00000220171.1/20042, exon 3 of 3)	20042	ENSMUST00000219783.1	-107	ENSMUSG00000061983	Rps12	ribosomal protein S12
1207	chr10	24155801	24155900	100	0.000376653	Exon (ENSMUST00000218050.1/53331, exon 2 of 2)	53331	ENSMUST00000219553.1	3354	ENSMUSG00000019998	Stx7	syntaxin 7
1208	chr10	24595501	24595600	100	5.23872e-15	5' UTR	14219	ENSMUST00000020171.11	59	ENSMUSG00000019997	Ccn2	cellular communication network factor 2
1209	chr10	24595801	24595900	100	5.87583e-08	Promoter	102638890	ENSMUST00000136908.7	0	NA	Gm15270	predicted gene 15270
1210	chr10	24596301	24596500	200	0.000368244	Exon (ENSMUST00000020171.11/14219, exon 3 of 5)	102638890	ENSMUST00000136908.7	-484	NA	Gm15270	predicted gene 15270
1211	chr10	24596701	24596800	100	1.75465e-06	Exon (ENSMUST00000020171.11/14219, exon 4 of 5)	102638890	ENSMUST00000136908.7	-884	NA	Gm15270	predicted gene 15270
1212	chr10	24596901	24597100	200	1.23315e-08	3' UTR	102638890	ENSMUST00000136908.7	-1084	NA	Gm15270	predicted gene 15270
1213	chr10	24597301	24598000	700	2.94415e-05	3' UTR	102638890	ENSMUST00000136908.7	-1484	NA	Gm15270	predicted gene 15270
1214	chr10	24598301	24598400	100	1.75465e-06	3' UTR	102638890	ENSMUST00000136908.7	-2484	NA	Gm15270	predicted gene 15270
1215	chr10	25443701	25443800	100	0.000736488	Exon (ENSMUST00000053748.15/13822, exon 3 of 20)	13822	ENSMUST00000220121.1	2090	ENSMUSG00000019978	Epb41l2	erythrocyte membrane protein band 4.1 like 2
1216	chr10	25498601	25498700	100	0.000736488	Intron (ENSMUST00000053748.15/13822, intron 14 of 19)	13822	ENSMUST00000219941.1	-1059	ENSMUSG00000019978	Epb41l2	erythrocyte membrane protein band 4.1 like 2
1217	chr10	25501901	25502000	100	0.000376653	Promoter	13822	ENSMUST00000218345.1	0	ENSMUSG00000019978	Epb41l2	erythrocyte membrane protein band 4.1 like 2
1218	chr10	25502101	25502200	100	0.000736488	Exon (ENSMUST00000053748.15/13822, exon 15 of 20)	13822	ENSMUST00000219372.1	-81	ENSMUSG00000019978	Epb41l2	erythrocyte membrane protein band 4.1 like 2
1219	chr10	28074801	28075000	200	1.99617e-06	Promoter	19272	ENSMUST00000166468.1	0	ENSMUSG00000019889	Ptprk	protein tyrosine phosphatase, receptor type, K
1220	chr10	28089501	28089600	100	0.000188117	Intron (ENSMUST00000166468.1/19272, intron 1 of 31)	19272	ENSMUST00000219761.1	14491	ENSMUSG00000019889	Ptprk	protein tyrosine phosphatase, receptor type, K
1221	chr10	28404201	28404300	100	0.000736488	Intron (ENSMUST00000166468.1/19272, intron 7 of 31)	19272	ENSMUST00000219621.1	-155851	ENSMUSG00000019889	Ptprk	protein tyrosine phosphatase, receptor type, K
1222	chr10	28480001	28480100	100	0.000376653	Intron (ENSMUST00000166468.1/19272, intron 10 of 31)	19272	ENSMUST00000219621.1	-80051	ENSMUSG00000019889	Ptprk	protein tyrosine phosphatase, receptor type, K
1223	chr10	29030201	29030300	100	0.000188117	Exon (ENSMUST00000178707.2/ENSMUST00000178707.2, exon 1 of 1)	67719	ENSMUST00000015663.6	-43898	ENSMUSG00000015519	2310057J18Rik	RIKEN cDNA 2310057J18 gene
1224	chr10	29346801	29346900	100	0.000376653	3' UTR	68031	ENSMUST00000162335.7	10813	ENSMUSG00000038876	Rnf146	ring finger protein 146
1225	chr10	29698701	29699200	500	0.000193575	Exon (ENSMUST00000092620.5/ENSMUST00000092620.5, exon 1 of 1)	72780	ENSMUST00000092623.4	-162834	ENSMUSG00000019880	Rspo3	R-spondin 3
1226	chr10	30618201	30618300	100	0.000376653	Exon (ENSMUST00000161074.7/66847, exon 1 of 5)	66847	ENSMUST00000160646.2	33	ENSMUSG00000019791	Hint3	histidine triad nucleotide binding protein 3
1227	chr10	34282601	34282700	100	0.000376653	Exon (ENSMUST00000061372.6/22110, exon 1 of 1)	22110	ENSMUST00000061372.6	411	ENSMUSG00000047514	Tspyl1	testis-specific protein, Y-encoded-like 1
1228	chr10	34483801	34483900	100	9.07675e-05	5' UTR	14302	ENSMUST00000215594.1	269	ENSMUSG00000019779	Frk	fyn-related kinase
1229	chr10	35710401	35710500	100	9.07675e-05	3' UTR	319415	ENSMUST00000167191.7	-796314	ENSMUSG00000044499	Hs3st5	heparan sulfate (glucosamine) 3-O-sulfotransferase 5
1230	chr10	36974501	36974600	100	0.000736488	Promoter	15182	ENSMUST00000019911.13	0	ENSMUSG00000019777	Hdac2	histone deacetylase 2
1231	chr10	39858001	39858100	100	0.000376653	Intron (ENSMUST00000019986.12/19714, intron 26 of 31)	19714	ENSMUST00000123103.1	-825	ENSMUSG00000019841	Rev3l	REV3 like, DNA directed polymerase zeta catalytic subunit
1232	chr10	40258401	40258500	100	5.23872e-15	Promoter	19850	ENSMUST00000196710.1	0	ENSMUSG00000106147	Snord3a	small nucleolar RNA, C/D box 3A
1233	chr10	40289201	40289300	100	4.29435e-05	3' UTR	100041585	ENSMUST00000214698.1	12276	ENSMUSG00000063953	Amd2	S-adenosylmethionine decarboxylase 2
1234	chr10	41436701	41436800	100	9.07675e-05	Distal Intergenic	268294	ENSMUST00000080771.9	-13583	ENSMUSG00000019826	Zbtb24	zinc finger and BTB domain containing 24
1235	chr10	41437801	41437900	100	0.000376653	Distal Intergenic	268294	ENSMUST00000080771.9	-12483	ENSMUSG00000019826	Zbtb24	zinc finger and BTB domain containing 24
1236	chr10	41439701	41439800	100	0.000736488	Distal Intergenic	268294	ENSMUST00000080771.9	-10583	ENSMUSG00000019826	Zbtb24	zinc finger and BTB domain containing 24
1237	chr10	41441401	41441500	100	0.000376653	Distal Intergenic	268294	ENSMUST00000080771.9	-8883	ENSMUSG00000019826	Zbtb24	zinc finger and BTB domain containing 24
1238	chr10	41442701	41442800	100	9.07675e-05	Distal Intergenic	268294	ENSMUST00000080771.9	-7583	ENSMUSG00000019826	Zbtb24	zinc finger and BTB domain containing 24
1239	chr10	41443101	41443300	200	9.40584e-05	Distal Intergenic	268294	ENSMUST00000080771.9	-7083	ENSMUSG00000019826	Zbtb24	zinc finger and BTB domain containing 24
1240	chr10	41444201	41444300	100	0.000376653	Distal Intergenic	268294	ENSMUST00000080771.9	-6083	ENSMUSG00000019826	Zbtb24	zinc finger and BTB domain containing 24
1241	chr10	41489101	41489200	100	4.29435e-05	Exon (ENSMUST00000126833.7/20598, exon 2 of 6)	20598	ENSMUST00000147367.7	479	ENSMUSG00000019822	Smpd2	sphingomyelin phosphodiesterase 2, neutral
1242	chr10	41490001	41490100	100	2.4663e-08	Promoter	20598	ENSMUST00000155411.7	0	ENSMUSG00000019822	Smpd2	sphingomyelin phosphodiesterase 2, neutral
1243	chr10	41528801	41529000	200	1.08111e-05	3' UTR	53599	ENSMUST00000186388.1	8757	ENSMUSG00000019818	Cd164	CD164 antigen
1244	chr10	41529101	41529200	100	3.99162e-06	3' UTR	53599	ENSMUST00000186388.1	9057	ENSMUSG00000019818	Cd164	CD164 antigen
1245	chr10	41529401	41529600	200	0.000413628	3' UTR	53599	ENSMUST00000186388.1	9357	ENSMUSG00000019818	Cd164	CD164 antigen
1246	chr10	41530501	41530700	200	0.00019826	3' UTR	53599	ENSMUST00000186388.1	10457	ENSMUSG00000019818	Cd164	CD164 antigen
1247	chr10	42054901	42055000	100	0.000736488	Exon (ENSMUST00000121229.1/ENSMUST00000121229.1, exon 1 of 1)	213402	ENSMUST00000161927.7	-36459	ENSMUSG00000071324	Armc2	armadillo repeat containing 2
1248	chr10	42186001	42186100	100	0.000376653	3' UTR	56484	ENSMUST00000177542.1	72266	ENSMUSG00000048756	Foxo3	forkhead box O3
1249	chr10	42234101	42234200	100	0.000736488	Intron (ENSMUST00000105502.7/56484, intron 2 of 3)	56484	ENSMUST00000177542.1	24166	ENSMUSG00000048756	Foxo3	forkhead box O3
1250	chr10	42239901	42240000	100	0.000376653	Intron (ENSMUST00000105502.7/56484, intron 2 of 3)	56484	ENSMUST00000177542.1	18366	ENSMUSG00000048756	Foxo3	forkhead box O3
1251	chr10	42246301	42246400	100	4.29435e-05	Intron (ENSMUST00000105502.7/56484, intron 2 of 3)	56484	ENSMUST00000177542.1	11966	ENSMUSG00000048756	Foxo3	forkhead box O3
1252	chr10	42258901	42259000	100	0.000736488	Intron (ENSMUST00000105502.7/56484, intron 2 of 3)	56484	ENSMUST00000177542.1	-535	ENSMUSG00000048756	Foxo3	forkhead box O3
1253	chr10	42263701	42263800	100	0.000736488	Intron (ENSMUST00000105502.7/56484, intron 2 of 3)	56484	ENSMUST00000177542.1	-5335	ENSMUSG00000048756	Foxo3	forkhead box O3
1254	chr10	42266101	42266200	100	0.000736488	Intron (ENSMUST00000105502.7/56484, intron 2 of 3)	56484	ENSMUST00000177542.1	-7735	ENSMUSG00000048756	Foxo3	forkhead box O3
1255	chr10	42268401	42268500	100	0.000736488	Intron (ENSMUST00000105502.7/56484, intron 2 of 3)	56484	ENSMUST00000175881.7	8196	ENSMUSG00000048756	Foxo3	forkhead box O3
1256	chr10	42270001	42270100	100	0.000736488	Intron (ENSMUST00000105502.7/56484, intron 2 of 3)	56484	ENSMUST00000175881.7	6596	ENSMUSG00000048756	Foxo3	forkhead box O3
1257	chr10	42274901	42275100	200	0.000139442	Exon (ENSMUST00000105502.7/56484, exon 2 of 4)	56484	ENSMUST00000175881.7	1596	ENSMUSG00000048756	Foxo3	forkhead box O3
1258	chr10	42275201	42275300	100	0.000188117	Exon (ENSMUST00000105502.7/56484, exon 2 of 4)	56484	ENSMUST00000175881.7	1396	ENSMUSG00000048756	Foxo3	forkhead box O3
1259	chr10	42502201	42502300	100	4.29435e-05	Promoter	54198	ENSMUST00000105499.1	0	ENSMUSG00000019804	Snx3	sorting nexin 3
1260	chr10	42534901	42535000	100	0.000376653	3' UTR	54198	ENSMUST00000105499.1	32611	ENSMUSG00000019804	Snx3	sorting nexin 3
1261	chr10	42678901	42679000	100	9.07675e-05	Promoter	14628	ENSMUST00000040718.5	0	ENSMUSG00000038280	Ostm1	osteopetrosis associated transmembrane protein 1
1262	chr10	42810001	42810100	100	0.000376653	Intron (ENSMUST00000019937.4/140740, intron 13 of 20)	140740	ENSMUST00000124613.7	-7828	ENSMUSG00000019802	Sec63	SEC63-like (S. cerevisiae)
1263	chr10	43582901	43583000	100	1.98676e-05	3' UTR	12484	ENSMUST00000214476.1	2966	ENSMUSG00000047139	Cd24a	CD24a antigen
1264	chr10	43583201	43583500	300	0.000372378	3' UTR	12484	ENSMUST00000214476.1	3266	ENSMUSG00000047139	Cd24a	CD24a antigen
1265	chr10	43583801	43583900	100	0.000736488	3' UTR	12484	ENSMUST00000214476.1	3866	ENSMUSG00000047139	Cd24a	CD24a antigen
1266	chr10	45875501	45875700	200	2.14769e-05	Exon (ENSMUST00000214811.1/ENSMUST00000214811.1, exon 1 of 1)	320363	ENSMUST00000215085.1	37621	ENSMUSG00000110874	D030045P18Rik	RIKEN cDNA D030045P18 gene
1267	chr10	45875801	45875900	100	5.87583e-08	Exon (ENSMUST00000214811.1/ENSMUST00000214811.1, exon 1 of 1)	320363	ENSMUST00000215085.1	37921	ENSMUSG00000110874	D030045P18Rik	RIKEN cDNA D030045P18 gene
1268	chr10	47454701	47454800	100	1.98676e-05	Distal Intergenic	320363	ENSMUST00000215085.1	1616821	ENSMUSG00000110874	D030045P18Rik	RIKEN cDNA D030045P18 gene
1269	chr10	47455201	47455400	200	9.44387e-05	Distal Intergenic	320363	ENSMUST00000215085.1	1617321	ENSMUSG00000110874	D030045P18Rik	RIKEN cDNA D030045P18 gene
1270	chr10	50421701	50422000	300	3.45785e-05	Distal Intergenic	77987	ENSMUST00000035606.9	-170669	ENSMUSG00000038774	Ascc3	activating signal cointegrator 1 complex subunit 3
1271	chr10	50422101	50422300	200	1.56686e-12	Exon (ENSMUST00000215196.1/ENSMUST00000215196.1, exon 1 of 1)	77987	ENSMUST00000035606.9	-170369	ENSMUSG00000038774	Ascc3	activating signal cointegrator 1 complex subunit 3
1272	chr10	50424601	50424800	200	0.000372732	Distal Intergenic	77987	ENSMUST00000035606.9	-167869	ENSMUSG00000038774	Ascc3	activating signal cointegrator 1 complex subunit 3
1273	chr10	50425101	50425200	100	0.000188117	Exon (ENSMUST00000213811.1/ENSMUST00000213811.1, exon 1 of 1)	77987	ENSMUST00000035606.9	-167469	ENSMUSG00000038774	Ascc3	activating signal cointegrator 1 complex subunit 3
1274	chr10	50425401	50425500	100	1.75465e-06	Distal Intergenic	77987	ENSMUST00000035606.9	-167169	ENSMUSG00000038774	Ascc3	activating signal cointegrator 1 complex subunit 3
1275	chr10	50426001	50426100	100	9.07675e-05	Distal Intergenic	77987	ENSMUST00000035606.9	-166569	ENSMUSG00000038774	Ascc3	activating signal cointegrator 1 complex subunit 3
1276	chr10	50426401	50426600	200	0.000368249	Distal Intergenic	77987	ENSMUST00000035606.9	-166069	ENSMUSG00000038774	Ascc3	activating signal cointegrator 1 complex subunit 3
1277	chr10	52057301	52057400	100	0.000736488	Intron (ENSMUST00000219173.1/19886, intron 43 of 44)	215031	ENSMUST00000058347.5	34578	ENSMUSG00000049641	Vgll2	vestigial like family member 2
1278	chr10	56497501	56497600	100	1.98676e-05	Exon (ENSMUST00000219246.1/ENSMUST00000219246.1, exon 1 of 1)	102640560	ENSMUST00000218830.1	65520	ENSMUSG00000112833	Gm36595	predicted gene, 36595
1279	chr10	57516201	57516400	200	0.00011553	3' UTR	15500	ENSMUST00000220162.1	6013	ENSMUSG00000019878	Hsf2	heat shock factor 2
1280	chr10	57516501	57516600	100	0.000376653	3' UTR	15500	ENSMUST00000220162.1	6313	ENSMUSG00000019878	Hsf2	heat shock factor 2
1281	chr10	57523001	57523100	100	0.000188117	Exon (ENSMUST00000020027.10/56442, exon 6 of 9)	56442	ENSMUST00000164400.1	9309	ENSMUSG00000019877	Serinc1	serine incorporator 1
1282	chr10	58423301	58423400	100	0.000736488	3' UTR	110829	ENSMUST00000148799.1	6658	ENSMUSG00000019920	Lims1	LIM and senescent cell antigen-like domains 1
1283	chr10	58478901	58479100	200	0.000389716	Exon (ENSMUST00000003310.6/19386, exon 20 of 29)	76138	ENSMUST00000036576.9	-18848	ENSMUSG00000038010	Ccdc138	coiled-coil domain containing 138
1284	chr10	58479401	58479500	100	9.07675e-05	Exon (ENSMUST00000003310.6/19386, exon 20 of 29)	76138	ENSMUST00000036576.9	-18448	ENSMUSG00000038010	Ccdc138	coiled-coil domain containing 138
1285	chr10	58479601	58479700	100	0.000188117	Exon (ENSMUST00000003310.6/19386, exon 20 of 29)	76138	ENSMUST00000036576.9	-18248	ENSMUSG00000038010	Ccdc138	coiled-coil domain containing 138
1286	chr10	59348601	59348700	100	0.000736488	Intron (ENSMUST00000009789.14/18451, intron 6 of 14)	18451	ENSMUST00000105466.2	25233	ENSMUSG00000019916	P4ha1	procollagen-proline, 2-oxoglutarate 4-dioxygenase (proline 4-hydroxylase), alpha 1 polypeptide
1287	chr10	59352301	59352400	100	0.000736488	Intron (ENSMUST00000009789.14/18451, intron 8 of 14)	18451	ENSMUST00000105466.2	28933	ENSMUSG00000019916	P4ha1	procollagen-proline, 2-oxoglutarate 4-dioxygenase (proline 4-hydroxylase), alpha 1 polypeptide
1288	chr10	59358701	59358800	100	0.000736488	Intron (ENSMUST00000009789.14/18451, intron 9 of 14)	18451	ENSMUST00000105466.2	35333	ENSMUSG00000019916	P4ha1	procollagen-proline, 2-oxoglutarate 4-dioxygenase (proline 4-hydroxylase), alpha 1 polypeptide
1289	chr10	59371601	59371700	100	0.000736488	3' UTR	69836	ENSMUST00000009790.13	-31960	ENSMUSG00000009646	Pla2g12b	phospholipase A2, group XIIB
1290	chr10	59382101	59382200	100	0.000188117	Distal Intergenic	69836	ENSMUST00000009790.13	-21460	ENSMUSG00000009646	Pla2g12b	phospholipase A2, group XIIB
1291	chr10	59396401	59396500	100	0.000188117	Distal Intergenic	69836	ENSMUST00000009790.13	-7160	ENSMUSG00000009646	Pla2g12b	phospholipase A2, group XIIB
1292	chr10	59597501	59597600	100	0.000736488	Intron (ENSMUST00000020312.12/215999, intron 1 of 7)	215999	ENSMUST00000162012.1	19055	ENSMUSG00000009647	Mcu	mitochondrial calcium uniporter
1293	chr10	59897801	59897900	100	0.000376653	3' UTR	56709	ENSMUST00000020309.6	18175	ENSMUSG00000020109	Dnajb12	DnaJ heat shock protein family (Hsp40) member B12
1294	chr10	59949801	59949900	100	9.07675e-05	3' UTR	74747	ENSMUST00000020308.4	1934	ENSMUSG00000020108	Ddit4	DNA-damage-inducible transcript 4
1295	chr10	59950201	59950300	100	4.29435e-05	3' UTR	74747	ENSMUST00000020308.4	1534	ENSMUSG00000020108	Ddit4	DNA-damage-inducible transcript 4
1296	chr10	59950501	59950900	400	4.80271e-05	3' UTR	74747	ENSMUST00000020308.4	934	ENSMUSG00000020108	Ddit4	DNA-damage-inducible transcript 4
1297	chr10	59951301	59951400	100	2.04892e-13	Exon (ENSMUST00000020308.4/74747, exon 2 of 3)	74747	ENSMUST00000020308.4	434	ENSMUSG00000020108	Ddit4	DNA-damage-inducible transcript 4
1298	chr10	59985901	59986000	100	0.000736488	Distal Intergenic	52717	ENSMUST00000182925.1	4383	ENSMUSG00000020107	Anapc16	anaphase promoting complex subunit 16
1299	chr10	59987901	59988000	100	0.000736488	3' UTR	52717	ENSMUST00000182925.1	2383	ENSMUSG00000020107	Anapc16	anaphase promoting complex subunit 16
1300	chr10	59988101	59988200	100	0.000376653	3' UTR	52717	ENSMUST00000182925.1	2183	ENSMUSG00000020107	Anapc16	anaphase promoting complex subunit 16
1301	chr10	59988601	59988700	100	0.000736488	3' UTR	52717	ENSMUST00000182925.1	1683	ENSMUSG00000020107	Anapc16	anaphase promoting complex subunit 16
1302	chr10	60296001	60296100	100	0.000188117	Exon (ENSMUST00000105465.7/19156, exon 7 of 14)	22295	ENSMUST00000156501.1	9549	ENSMUSG00000012819	Cdh23	cadherin 23 (otocadherin)
1303	chr10	60297701	60297800	100	1.98676e-05	Intron (ENSMUST00000105465.7/19156, intron 7 of 13)	22295	ENSMUST00000156501.1	7849	ENSMUSG00000012819	Cdh23	cadherin 23 (otocadherin)
1304	chr10	60300001	60300100	100	0.000736488	Exon (ENSMUST00000105465.7/19156, exon 10 of 14)	22295	ENSMUST00000156501.1	5549	ENSMUSG00000012819	Cdh23	cadherin 23 (otocadherin)
1305	chr10	60301801	60301900	100	8.97631e-06	3' UTR	22295	ENSMUST00000156501.1	3749	ENSMUSG00000012819	Cdh23	cadherin 23 (otocadherin)
1306	chr10	60302201	60302400	200	6.93672e-08	3' UTR	22295	ENSMUST00000156501.1	3249	ENSMUSG00000012819	Cdh23	cadherin 23 (otocadherin)
1307	chr10	61093901	61094000	100	0.000188117	3' UTR	13180	ENSMUST00000020298.7	4542	ENSMUSG00000020098	Pcbd1	pterin 4 alpha carbinolamine dehydratase/dimerization cofactor of hepatocyte nuclear factor 1 alpha (TCF1) 1
1308	chr10	61099901	61100000	100	0.000736488	3' UTR	20397	ENSMUST00000143225.1	3125	ENSMUSG00000020097	Sgpl1	sphingosine phosphate lyase 1
1309	chr10	61429901	61430100	200	0.000188396	3' UTR	18119	ENSMUST00000049339.6	11929	ENSMUSG00000037171	Nodal	nodal
1310	chr10	61430601	61430800	200	2.87313e-06	3' UTR	18119	ENSMUST00000049339.6	12629	ENSMUSG00000037171	Nodal	nodal
1311	chr10	61431501	61431600	100	0.000376653	3' UTR	18119	ENSMUST00000049339.6	13529	ENSMUSG00000037171	Nodal	nodal
1312	chr10	61431901	61432000	100	4.29435e-05	3' UTR	18119	ENSMUST00000049339.6	13929	ENSMUSG00000037171	Nodal	nodal
1313	chr10	61432801	61432900	100	4.29435e-05	3' UTR	18119	ENSMUST00000049339.6	14829	ENSMUSG00000037171	Nodal	nodal
1314	chr10	61433201	61433300	100	9.07675e-05	3' UTR	18119	ENSMUST00000049339.6	15229	ENSMUSG00000037171	Nodal	nodal
1315	chr10	61433601	61433700	100	1.98676e-05	3' UTR	18119	ENSMUST00000049339.6	15629	ENSMUSG00000037171	Nodal	nodal
1316	chr10	62290101	62290200	100	0.000188117	Exon (ENSMUST00000099691.10/15275, exon 9 of 18)	15275	ENSMUST00000161160.1	129	ENSMUSG00000037012	Hk1	hexokinase 1
1317	chr10	62456601	62456700	100	4.29435e-05	3' UTR	338359	ENSMUST00000020273.15	-6863	ENSMUSG00000020079	Supv3l1	suppressor of var1, 3-like 1 (S. cerevisiae)
1318	chr10	62634301	62634400	100	0.000736488	Exon (ENSMUST00000217970.1/94213, exon 1 of 3)	94213	ENSMUST00000217970.1	106	ENSMUSG00000020076	Ddx50	DExD box helicase 50
1319	chr10	62642401	62642500	100	0.000736488	Intron (ENSMUST00000020270.5/94213, intron 4 of 14)	94213	ENSMUST00000219076.1	-1237	ENSMUSG00000020076	Ddx50	DExD box helicase 50
1320	chr10	62764201	62764300	100	0.000736488	Exon (ENSMUST00000218552.1/67500, exon 1 of 4)	67500	ENSMUST00000218786.1	-734	ENSMUSG00000020074	Ccar1	cell division cycle and apoptosis regulator 1
1321	chr10	64539601	64539700	100	0.000188117	Intron (ENSMUST00000105441.7/216033, intron 11 of 17)	216028	ENSMUST00000131945.1	-449324	ENSMUSG00000042846	Lrrtm3	leucine rich repeat transmembrane neuronal 3
1322	chr10	67013101	67013200	100	0.000188117	3' UTR	102634101	ENSMUST00000219739.1	8026	ENSMUSG00000112925	Gm31763	predicted gene, 31763
1323	chr10	67013301	67013400	100	0.000736488	3' UTR	102634101	ENSMUST00000219739.1	8226	ENSMUSG00000112925	Gm31763	predicted gene, 31763
1324	chr10	67096501	67096600	100	7.60547e-07	5' UTR	108829	ENSMUST00000174317.7	9	ENSMUSG00000037876	Jmjd1c	jumonji domain containing 1C
1325	chr10	67220201	67220300	100	0.000188117	Exon (ENSMUST00000174317.7/108829, exon 8 of 10)	108829	ENSMUST00000173187.1	2461	ENSMUSG00000037876	Jmjd1c	jumonji domain containing 1C
1326	chr10	67224701	67224800	100	0.000736488	Exon (ENSMUST00000174317.7/108829, exon 10 of 10)	108829	ENSMUST00000173187.1	6961	ENSMUSG00000037876	Jmjd1c	jumonji domain containing 1C
1327	chr10	67226101	67226200	100	0.000736488	Exon (ENSMUST00000174408.7/108829, exon 10 of 26)	108829	ENSMUST00000173187.1	8361	ENSMUSG00000037876	Jmjd1c	jumonji domain containing 1C
1328	chr10	67253101	67253200	100	0.000376653	Intron (ENSMUST00000174408.7/108829, intron 24 of 25)	108829	ENSMUST00000173236.1	14179	ENSMUSG00000037876	Jmjd1c	jumonji domain containing 1C
1329	chr10	69533801	69533900	100	4.29435e-05	Promoter	11735	ENSMUST00000182373.7	0	ENSMUSG00000069601	Ank3	ankyrin 3, epithelial
1330	chr10	69689601	69689700	100	0.000376653	Intron (ENSMUST00000218680.1/11735, intron 2 of 42)	11735	ENSMUST00000182992.7	-16670	ENSMUSG00000069601	Ank3	ankyrin 3, epithelial
1331	chr10	69988601	69988700	100	0.000736488	Exon (ENSMUST00000182992.7/11735, exon 37 of 43)	11735	ENSMUST00000183023.7	752	ENSMUSG00000069601	Ank3	ankyrin 3, epithelial
1332	chr10	69999801	69999900	100	0.000188117	Intron (ENSMUST00000218680.1/11735, intron 39 of 42)	11735	ENSMUST00000183001.1	5498	ENSMUSG00000069601	Ank3	ankyrin 3, epithelial
1333	chr10	72662101	72662200	100	0.000188117	Intron (ENSMUST00000020081.10/52696, intron 7 of 7)	52696	ENSMUST00000219352.1	5857	ENSMUSG00000019923	Zwint	ZW10 interactor
1334	chr10	72667901	72668000	100	0.000736488	3' UTR	52696	ENSMUST00000219352.1	11657	ENSMUSG00000019923	Zwint	ZW10 interactor
1335	chr10	75245101	75245200	100	0.000736488	Exon (ENSMUST00000218766.1/74392, exon 4 of 16)	74392	ENSMUST00000040105.7	15246	ENSMUSG00000033444	Specc1l	sperm antigen with calponin homology and coiled-coil domains 1-like
1336	chr10	75509601	75509700	100	9.07675e-05	3' UTR	68778	ENSMUST00000129307.1	1564	ENSMUSG00000033416	Gucd1	guanylyl cyclase domain containing 1
1337	chr10	75716701	75716800	100	0.000376653	3' UTR	104248	ENSMUST00000219806.1	-1057	ENSMUSG00000020196	Cabin1	calcineurin binding protein 1
1338	chr10	75717401	75717500	100	3.26219e-07	Exon (ENSMUST00000001712.7/104248, exon 24 of 37)	104248	ENSMUST00000219806.1	-1757	ENSMUSG00000020196	Cabin1	calcineurin binding protein 1
1339	chr10	75859301	75859600	300	3.99162e-06	3' UTR	17319	ENSMUST00000218267.1	592	ENSMUSG00000033307	Mif	macrophage migration inhibitory factor (glycosylation-inhibiting factor)
1340	chr10	75859701	75859800	100	1.98676e-05	Exon (ENSMUST00000038169.7/17319, exon 2 of 3)	17319	ENSMUST00000218267.1	392	ENSMUSG00000033307	Mif	macrophage migration inhibitory factor (glycosylation-inhibiting factor)
1341	chr10	76551901	76552000	100	4.29435e-05	Exon (ENSMUST00000162848.1/16987, exon 1 of 2)	16987	ENSMUST00000162282.1	-271	ENSMUSG00000033105	Lss	lanosterol synthase
1342	chr10	76553001	76553100	100	0.000736488	3' UTR	16987	ENSMUST00000162282.1	730	ENSMUSG00000033105	Lss	lanosterol synthase
1343	chr10	76553201	76553400	200	0.000736488	3' UTR	16987	ENSMUST00000162282.1	930	ENSMUSG00000033105	Lss	lanosterol synthase
1344	chr10	76554301	76554400	100	0.000376653	3' UTR	16987	ENSMUST00000162282.1	2030	ENSMUSG00000033105	Lss	lanosterol synthase
1345	chr10	76709301	76709500	200	0.000209798	3' UTR	12833	ENSMUST00000137599.1	9736	ENSMUSG00000001119	Col6a1	collagen, type VI, alpha 1
1346	chr10	76711301	76711400	100	0.000736488	Exon (ENSMUST00000001147.4/12833, exon 32 of 35)	12833	ENSMUST00000137599.1	7836	ENSMUSG00000001119	Col6a1	collagen, type VI, alpha 1
1347	chr10	76720201	76720300	100	0.000736488	Intron (ENSMUST00000001147.4/12833, intron 8 of 34)	12833	ENSMUST00000137599.1	-965	ENSMUSG00000001119	Col6a1	collagen, type VI, alpha 1
1348	chr10	77052201	77052300	100	0.000188117	3' UTR	12822	ENSMUST00000218407.1	7697	ENSMUSG00000001435	Col18a1	collagen, type XVIII, alpha 1
1349	chr10	77052401	77052700	300	0.000261141	3' UTR	12822	ENSMUST00000218407.1	7297	ENSMUSG00000001435	Col18a1	collagen, type XVIII, alpha 1
1350	chr10	77053101	77053200	100	1.74653e-09	3' UTR	12822	ENSMUST00000218407.1	6797	ENSMUSG00000001435	Col18a1	collagen, type XVIII, alpha 1
1351	chr10	77055601	77055700	100	5.87583e-08	Exon (ENSMUST00000081654.12/12822, exon 39 of 42)	12822	ENSMUST00000218407.1	4297	ENSMUSG00000001435	Col18a1	collagen, type XVIII, alpha 1
1352	chr10	77058701	77058800	100	1.98676e-05	Exon (ENSMUST00000081654.12/12822, exon 37 of 42)	12822	ENSMUST00000218407.1	1197	ENSMUSG00000001435	Col18a1	collagen, type XVIII, alpha 1
1353	chr10	77060501	77060600	100	0.000736488	Intron (ENSMUST00000131031.1/20509, intron 2 of 2)	12822	ENSMUST00000218407.1	-504	ENSMUSG00000001435	Col18a1	collagen, type XVIII, alpha 1
1354	chr10	77060701	77060800	100	0.000376653	3' UTR	12822	ENSMUST00000218407.1	-704	ENSMUSG00000001435	Col18a1	collagen, type XVIII, alpha 1
1355	chr10	77061701	77061800	100	0.000188117	Intron (ENSMUST00000081654.12/12822, intron 32 of 41)	12822	ENSMUST00000218407.1	-1704	ENSMUSG00000001435	Col18a1	collagen, type XVIII, alpha 1
1356	chr10	77062801	77062900	100	0.000736488	Intron (ENSMUST00000081654.12/12822, intron 32 of 41)	12822	ENSMUST00000218407.1	-2804	ENSMUSG00000001435	Col18a1	collagen, type XVIII, alpha 1
1357	chr10	77063201	77063300	100	0.000188117	Intron (ENSMUST00000081654.12/12822, intron 32 of 41)	12822	ENSMUST00000218407.1	-3204	ENSMUSG00000001435	Col18a1	collagen, type XVIII, alpha 1
1358	chr10	77063501	77063600	100	0.000736488	Intron (ENSMUST00000081654.12/12822, intron 32 of 41)	12822	ENSMUST00000218407.1	-3504	ENSMUSG00000001435	Col18a1	collagen, type XVIII, alpha 1
1359	chr10	77072501	77072600	100	0.000736488	Intron (ENSMUST00000081654.12/12822, intron 18 of 41)	12822	ENSMUST00000218407.1	-12504	ENSMUSG00000001435	Col18a1	collagen, type XVIII, alpha 1
1360	chr10	77076301	77076400	100	0.000736488	Intron (ENSMUST00000081654.12/12822, intron 14 of 41)	12822	ENSMUST00000156009.1	13028	ENSMUSG00000001435	Col18a1	collagen, type XVIII, alpha 1
1361	chr10	77076601	77076700	100	0.000376653	Intron (ENSMUST00000081654.12/12822, intron 14 of 41)	12822	ENSMUST00000156009.1	12728	ENSMUSG00000001435	Col18a1	collagen, type XVIII, alpha 1
1362	chr10	77077401	77077500	100	0.000188117	Intron (ENSMUST00000081654.12/12822, intron 13 of 41)	12822	ENSMUST00000156009.1	11928	ENSMUSG00000001435	Col18a1	collagen, type XVIII, alpha 1
1363	chr10	77080601	77080700	100	0.000736488	Exon (ENSMUST00000081654.12/12822, exon 8 of 42)	12822	ENSMUST00000156009.1	8728	ENSMUSG00000001435	Col18a1	collagen, type XVIII, alpha 1
1364	chr10	77096001	77096100	100	0.000188117	Exon (ENSMUST00000081654.12/12822, exon 3 of 42)	12822	ENSMUST00000156009.1	-6573	ENSMUSG00000001435	Col18a1	collagen, type XVIII, alpha 1
1365	chr10	77096301	77096400	100	0.000376653	Exon (ENSMUST00000081654.12/12822, exon 3 of 42)	12822	ENSMUST00000156009.1	-6873	ENSMUSG00000001435	Col18a1	collagen, type XVIII, alpha 1
1366	chr10	77137901	77138000	100	0.000736488	Exon (ENSMUST00000218871.1/ENSMUST00000218871.1, exon 1 of 1)	12822	ENSMUST00000072755.11	-23955	ENSMUSG00000001435	Col18a1	collagen, type XVIII, alpha 1
1367	chr10	77140201	77140300	100	9.07675e-05	Intron (ENSMUST00000081654.12/12822, intron 2 of 41)	12822	ENSMUST00000081654.12	26248	ENSMUSG00000001435	Col18a1	collagen, type XVIII, alpha 1
1368	chr10	77141501	77141600	100	9.07675e-05	Intron (ENSMUST00000081654.12/12822, intron 2 of 41)	12822	ENSMUST00000081654.12	24948	ENSMUSG00000001435	Col18a1	collagen, type XVIII, alpha 1
1369	chr10	77592301	77592400	100	0.000736488	Promoter	108705	ENSMUST00000167006.1	0	ENSMUSG00000009291	Pttg1ip	pituitary tumor-transforming 1 interacting protein
1370	chr10	77597301	77597400	100	9.07675e-05	3' UTR	108705	ENSMUST00000167006.1	4964	ENSMUSG00000009291	Pttg1ip	pituitary tumor-transforming 1 interacting protein
1371	chr10	77597801	77598000	200	0.000556571	3' UTR	108705	ENSMUST00000167006.1	5464	ENSMUSG00000009291	Pttg1ip	pituitary tumor-transforming 1 interacting protein
1372	chr10	77598101	77598200	100	0.000736488	3' UTR	108705	ENSMUST00000167006.1	5764	ENSMUSG00000009291	Pttg1ip	pituitary tumor-transforming 1 interacting protein
1373	chr10	77598301	77598500	200	0.000556571	3' UTR	108705	ENSMUST00000167006.1	5964	ENSMUSG00000009291	Pttg1ip	pituitary tumor-transforming 1 interacting protein
1374	chr10	77616101	77616200	100	9.07675e-05	3' UTR	20610	ENSMUST00000124024.2	2392	ENSMUSG00000020265	Sumo3	small ubiquitin-like modifier 3
1375	chr10	77616601	77616700	100	0.000736488	3' UTR	20610	ENSMUST00000124024.2	2892	ENSMUSG00000020265	Sumo3	small ubiquitin-like modifier 3
1376	chr10	77645301	77645400	100	0.000188117	3' UTR	100316811	ENSMUST00000158799.1	4077	ENSMUSG00000089424	Mir1930	microRNA 1930
1377	chr10	77985701	77985800	100	4.29435e-05	Intron (ENSMUST00000105398.1/67884, intron 7 of 7)	67884	ENSMUST00000129277.1	3939	ENSMUSG00000020284	Cfap410	cilia and flagella associated protein 410
1378	chr10	77987901	77988200	300	0.000139874	3' UTR	18641	ENSMUST00000149271.2	3976	ENSMUSG00000020277	Pfkl	phosphofructokinase, liver, B-type
1379	chr10	77999801	77999900	100	9.07675e-05	3' UTR	18641	ENSMUST00000148818.1	34	ENSMUSG00000020277	Pfkl	phosphofructokinase, liver, B-type
1380	chr10	78007701	78007800	100	0.000736488	Exon (ENSMUST00000220304.1/ENSMUST00000220304.1, exon 1 of 1)	18641	ENSMUST00000218383.1	1927	ENSMUSG00000020277	Pfkl	phosphofructokinase, liver, B-type
1381	chr10	78008501	78008600	100	0.000376653	Exon (ENSMUST00000220304.1/ENSMUST00000220304.1, exon 1 of 1)	18641	ENSMUST00000218383.1	1127	ENSMUSG00000020277	Pfkl	phosphofructokinase, liver, B-type
1382	chr10	78162801	78162900	100	0.000188117	3' UTR	28295	ENSMUST00000220359.1	4542	ENSMUSG00000053329	Gatd3a	glutamine amidotransferase like class 1 domain containing 3A
1383	chr10	78270601	78270700	100	0.000376653	3' UTR	28169	ENSMUST00000146296.1	7736	ENSMUSG00000001211	Agpat3	1-acylglycerol-3-phosphate O-acyltransferase 3
1384	chr10	78272001	78272100	100	4.29435e-05	3' UTR	28169	ENSMUST00000146296.1	6336	ENSMUSG00000001211	Agpat3	1-acylglycerol-3-phosphate O-acyltransferase 3
1385	chr10	78405001	78405200	200	0.000462303	3' UTR	18114	ENSMUST00000218962.1	538	ENSMUSG00000061032	Rrp1	ribosomal RNA processing 1
1386	chr10	78589301	78589400	100	0.000736488	Exon (ENSMUST00000040580.6/71709, exon 3 of 8)	71709	ENSMUST00000040580.6	2564	ENSMUSG00000032714	Syde1	synapse defective 1, Rho GTPase, homolog 1 (C. elegans)
1387	chr10	79405801	79405900	100	0.000736488	Distal Intergenic	624845	ENSMUST00000233963.1	49281	ENSMUSG00000091468	Vmn2r82	vomeronasal 2, receptor 82
1388	chr10	79406201	79406300	100	0.000188117	Distal Intergenic	624845	ENSMUST00000233963.1	49681	ENSMUSG00000091468	Vmn2r82	vomeronasal 2, receptor 82
1389	chr10	79407801	79407900	100	0.000376653	Distal Intergenic	624845	ENSMUST00000233963.1	51281	ENSMUSG00000091468	Vmn2r82	vomeronasal 2, receptor 82
1390	chr10	79408801	79408900	100	1.75465e-06	Distal Intergenic	624845	ENSMUST00000233963.1	52281	ENSMUSG00000091468	Vmn2r82	vomeronasal 2, receptor 82
1391	chr10	79409901	79410000	100	9.07675e-05	Distal Intergenic	624845	ENSMUST00000233963.1	53381	ENSMUSG00000091468	Vmn2r82	vomeronasal 2, receptor 82
1392	chr10	79410501	79410600	100	0.000736488	Distal Intergenic	624845	ENSMUST00000233963.1	53981	ENSMUSG00000091468	Vmn2r82	vomeronasal 2, receptor 82
1393	chr10	79410901	79411100	200	0.000462303	Distal Intergenic	624845	ENSMUST00000233963.1	54381	ENSMUSG00000091468	Vmn2r82	vomeronasal 2, receptor 82
1394	chr10	79412401	79412500	100	4.29435e-05	Distal Intergenic	624845	ENSMUST00000233963.1	55881	ENSMUSG00000091468	Vmn2r82	vomeronasal 2, receptor 82
1395	chr10	79412601	79412800	200	0.000282385	Distal Intergenic	625029	ENSMUST00000233065.1	-55931	ENSMUSG00000091381	Vmn2r83	vomeronasal 2, receptor 83
1396	chr10	79412901	79413800	900	4.20499e-06	Exon (ENSMUST00000217947.1/ENSMUST00000217947.1, exon 2 of 2)	625029	ENSMUST00000233065.1	-54931	ENSMUSG00000091381	Vmn2r83	vomeronasal 2, receptor 83
1397	chr10	79413901	79415300	1400	4.1477e-07	Exon (ENSMUST00000217947.1/ENSMUST00000217947.1, exon 2 of 2)	625029	ENSMUST00000233065.1	-53431	ENSMUSG00000091381	Vmn2r83	vomeronasal 2, receptor 83
1398	chr10	79415401	79415500	100	8.97631e-06	Intron (ENSMUST00000217947.1/ENSMUST00000217947.1, intron 1 of 1)	625029	ENSMUST00000233065.1	-53231	ENSMUSG00000091381	Vmn2r83	vomeronasal 2, receptor 83
1399	chr10	79415601	79416000	400	1.26961e-06	Intron (ENSMUST00000217947.1/ENSMUST00000217947.1, intron 1 of 1)	625029	ENSMUST00000233065.1	-52731	ENSMUSG00000091381	Vmn2r83	vomeronasal 2, receptor 83
1400	chr10	79416101	79416200	100	9.07675e-05	Intron (ENSMUST00000217947.1/ENSMUST00000217947.1, intron 1 of 1)	625029	ENSMUST00000233065.1	-52531	ENSMUSG00000091381	Vmn2r83	vomeronasal 2, receptor 83
1401	chr10	79416301	79417300	1000	4.88092e-06	Intron (ENSMUST00000217947.1/ENSMUST00000217947.1, intron 1 of 1)	625029	ENSMUST00000233065.1	-51431	ENSMUSG00000091381	Vmn2r83	vomeronasal 2, receptor 83
1402	chr10	79417501	79417700	200	0.000368244	Exon (ENSMUST00000217947.1/ENSMUST00000217947.1, exon 1 of 2)	625029	ENSMUST00000233065.1	-51031	ENSMUSG00000091381	Vmn2r83	vomeronasal 2, receptor 83
1403	chr10	79526501	79526600	100	4.29435e-05	3' UTR	102465548	ENSMUST00000184212.1	4490	ENSMUSG00000098414	Mir6909	microRNA 6909
1404	chr10	79527001	79527100	100	8.97631e-06	3' UTR	102465548	ENSMUST00000184212.1	3990	ENSMUSG00000098414	Mir6909	microRNA 6909
1405	chr10	79530501	79530600	100	0.000736488	3' UTR	102465548	ENSMUST00000184212.1	490	ENSMUSG00000098414	Mir6909	microRNA 6909
1406	chr10	79685001	79685100	100	0.000736488	Promoter	216150	ENSMUST00000220328.1	0	ENSMUSG00000020307	Cdc34	cell division cycle 34
1407	chr10	79687801	79687900	100	7.60547e-07	3' UTR	16904	ENSMUST00000020549.3	-1120	ENSMUSG00000054206	Gzmm	granzyme M (lymphocyte met-ase 1)
1408	chr10	79705001	79705100	100	0.000736488	Intron (ENSMUST00000179781.7/12215, intron 1 of 6)	12215	ENSMUST00000178383.7	431	ENSMUSG00000023175	Bsg	basigin
1409	chr10	79706101	79706200	100	0.000376653	Intron (ENSMUST00000179781.7/12215, intron 1 of 6)	12215	ENSMUST00000178383.7	1531	ENSMUSG00000023175	Bsg	basigin
1410	chr10	79707501	79707600	100	1.75465e-06	Intron (ENSMUST00000179781.7/12215, intron 1 of 6)	12215	ENSMUST00000105381.4	-1998	ENSMUSG00000023175	Bsg	basigin
1411	chr10	79707801	79707900	100	8.97631e-06	Intron (ENSMUST00000179781.7/12215, intron 1 of 6)	12215	ENSMUST00000105381.4	-1698	ENSMUSG00000023175	Bsg	basigin
1412	chr10	79708001	79708100	100	0.000736488	Intron (ENSMUST00000179781.7/12215, intron 1 of 6)	12215	ENSMUST00000105381.4	-1498	ENSMUSG00000023175	Bsg	basigin
1413	chr10	79708601	79708700	100	0.000736488	Exon (ENSMUST00000067036.11/12215, exon 2 of 8)	12215	ENSMUST00000105381.4	-898	ENSMUSG00000023175	Bsg	basigin
1414	chr10	79708801	79708900	100	0.000376653	Exon (ENSMUST00000067036.11/12215, exon 2 of 8)	12215	ENSMUST00000105381.4	-698	ENSMUSG00000023175	Bsg	basigin
1415	chr10	79709001	79709200	200	0.000556571	Exon (ENSMUST00000067036.11/12215, exon 2 of 8)	12215	ENSMUST00000105381.4	-398	ENSMUSG00000023175	Bsg	basigin
1416	chr10	79709701	79709800	100	5.23872e-15	5' UTR	12215	ENSMUST00000105381.4	103	ENSMUSG00000023175	Bsg	basigin
1417	chr10	79710601	79710800	200	9.6873e-12	Exon (ENSMUST00000179781.7/12215, exon 5 of 7)	12215	ENSMUST00000180235.1	496	ENSMUSG00000023175	Bsg	basigin
1418	chr10	79711501	79711800	300	6.77067e-15	3' UTR	12215	ENSMUST00000180235.1	1396	ENSMUSG00000023175	Bsg	basigin
1419	chr10	79854801	79854900	100	0.000736488	Exon (ENSMUST00000168521.1/ENSMUST00000168521.1, exon 1 of 2)	414101	ENSMUST00000217802.1	71	ENSMUSG00000091994	E130317F20Rik	RIKEN cDNA E130317F20 gene
1420	chr10	79858901	79859000	100	0.000376653	Promoter	19205	ENSMUST00000171216.1	0	ENSMUSG00000006498	Ptbp1	polypyrimidine tract binding protein 1
1421	chr10	79862101	79862200	100	0.000188117	Exon (ENSMUST00000169580.1/19205, exon 1 of 4)	19205	ENSMUST00000169580.1	84	ENSMUSG00000006498	Ptbp1	polypyrimidine tract binding protein 1
1422	chr10	79863901	79864100	200	0.000462303	3' UTR	102465549	ENSMUST00000184090.1	1314	ENSMUSG00000098562	Mir6910	microRNA 6910
1423	chr10	79888601	79888700	100	2.4663e-08	Distal Intergenic	11537	ENSMUST00000217837.1	-2153	ENSMUSG00000061780	Cfd	complement factor D (adipsin)
1424	chr10	79912101	79912200	100	9.07675e-05	Exon (ENSMUST00000045628.14/109284, exon 6 of 8)	109284	ENSMUST00000219358.1	487	ENSMUSG00000035781	R3hdm4	R3H domain containing 4
1425	chr10	79977501	79977600	100	0.000736488	Exon (ENSMUST00000132080.1/216157, exon 5 of 5)	216157	ENSMUST00000132080.1	1173	ENSMUSG00000013858	Tmem259	transmembrane protein 259
1426	chr10	79979301	79979400	100	0.000736488	Exon (ENSMUST00000052885.13/216157, exon 3 of 11)	216157	ENSMUST00000126383.1	-361	ENSMUSG00000013858	Tmem259	transmembrane protein 259
1427	chr10	80054001	80054100	100	0.000736488	Promoter	625249	ENSMUST00000145703.1	0	ENSMUSG00000075706	Gpx4	glutathione peroxidase 4
1428	chr10	80054801	80054900	100	3.26219e-07	Exon (ENSMUST00000105372.7/625249, exon 3 of 7)	625249	ENSMUST00000183037.1	336	ENSMUSG00000075706	Gpx4	glutathione peroxidase 4
1429	chr10	80056001	80056100	100	3.26219e-07	Exon (ENSMUST00000144698.7/625249, exon 6 of 7)	625249	ENSMUST00000136081.1	3	ENSMUSG00000075706	Gpx4	glutathione peroxidase 4
1430	chr10	80056201	80056300	100	4.29435e-05	3' UTR	625249	ENSMUST00000136081.1	203	ENSMUSG00000075706	Gpx4	glutathione peroxidase 4
1431	chr10	80064901	80065000	100	0.000736488	Intron (ENSMUST00000219260.1/216161, intron 15 of 32)	625249	ENSMUST00000136081.1	8903	ENSMUSG00000075706	Gpx4	glutathione peroxidase 4
1432	chr10	80067901	80068000	100	0.000736488	Intron (ENSMUST00000219260.1/216161, intron 12 of 32)	216161	ENSMUST00000218310.1	7400	ENSMUSG00000035673	Sbno2	strawberry notch 2
1433	chr10	80077601	80077700	100	0.000736488	Intron (ENSMUST00000219260.1/216161, intron 5 of 32)	216161	ENSMUST00000217876.1	-2162	ENSMUSG00000035673	Sbno2	strawberry notch 2
1434	chr10	80081601	80081700	100	0.000736488	Exon (ENSMUST00000217683.1/216161, exon 4 of 4)	216161	ENSMUST00000217876.1	-6162	ENSMUSG00000035673	Sbno2	strawberry notch 2
1435	chr10	80115801	80115900	100	3.99162e-06	Promoter	20869	ENSMUST00000144883.7	0	ENSMUSG00000003068	Stk11	serine/threonine kinase 11
1436	chr10	80116601	80116700	100	0.000376653	Promoter	20869	ENSMUST00000213772.1	0	ENSMUSG00000003068	Stk11	serine/threonine kinase 11
1437	chr10	80142301	80142500	200	1.98676e-05	Promoter	66043	ENSMUST00000003156.14	0	ENSMUSG00000003072	Atp5d	ATP synthase, H+ transporting, mitochondrial F1 complex, delta subunit
1438	chr10	80145401	80145600	200	4.48816e-06	3' UTR	59090	ENSMUST00000099492.9	-2672	ENSMUSG00000035621	Midn	midnolin
1439	chr10	80149701	80149800	100	4.29435e-05	5' UTR	59090	ENSMUST00000124179.1	-86	ENSMUSG00000035621	Midn	midnolin
1440	chr10	80149901	80150000	100	4.29435e-05	5' UTR	59090	ENSMUST00000124179.1	15	ENSMUSG00000035621	Midn	midnolin
1441	chr10	80153801	80153900	100	7.60547e-07	Exon (ENSMUST00000099492.9/59090, exon 5 of 8)	59090	ENSMUST00000144526.1	2563	ENSMUSG00000035621	Midn	midnolin
1442	chr10	80155101	80155200	100	9.07675e-05	Exon (ENSMUST00000099492.9/59090, exon 7 of 8)	59090	ENSMUST00000144526.1	3863	ENSMUSG00000035621	Midn	midnolin
1443	chr10	80157501	80157600	100	9.07675e-05	3' UTR	59090	ENSMUST00000144526.1	6263	ENSMUSG00000035621	Midn	midnolin
1444	chr10	80158001	80158100	100	0.000188117	3' UTR	59090	ENSMUST00000144526.1	6763	ENSMUSG00000035621	Midn	midnolin
1445	chr10	80171301	80171400	100	4.29435e-05	3' UTR	12696	ENSMUST00000147190.1	-582	ENSMUSG00000045193	Cirbp	cold inducible RNA binding protein
1446	chr10	80171701	80171800	100	0.000188117	Intron (ENSMUST00000054666.6/12696, intron 6 of 7)	12696	ENSMUST00000147190.1	-182	ENSMUSG00000045193	Cirbp	cold inducible RNA binding protein
1447	chr10	80172001	80172100	100	0.000188117	Exon (ENSMUST00000147190.1/12696, exon 1 of 2)	12696	ENSMUST00000147190.1	19	ENSMUSG00000045193	Cirbp	cold inducible RNA binding protein
1448	chr10	80279001	80279100	100	1.98676e-05	Intron (ENSMUST00000156935.7/70248, intron 6 of 6)	102466207	ENSMUST00000184241.1	837	ENSMUSG00000098672	Mir6911	microRNA 6911
1449	chr10	80287501	80287600	100	0.000736488	Exon (ENSMUST00000105362.7/70248, exon 12 of 12)	70248	ENSMUST00000151619.1	4634	ENSMUSG00000069565	Dazap1	DAZ associated protein 1
1450	chr10	80293601	80293900	300	1.08978e-07	Exon (ENSMUST00000068408.13/20054, exon 3 of 4)	20054	ENSMUST00000062674.6	956	ENSMUSG00000063457	Rps15	ribosomal protein S15
1451	chr10	80410001	80410100	100	0.000736488	3' UTR	66594	ENSMUST00000020372.5	-3171	ENSMUSG00000020163	Uqcr11	ubiquinol-cytochrome c reductase, complex III subunit XI
1452	chr10	80547801	80547900	100	0.000736488	3' UTR	66932	ENSMUST00000182260.7	21	ENSMUSG00000047417	Rexo1	REX1, RNA exonuclease 1
1453	chr10	80561201	80561300	100	0.000736488	Exon (ENSMUST00000057910.15/66932, exon 1 of 15)	66932	ENSMUST00000057910.15	260	ENSMUSG00000047417	Rexo1	REX1, RNA exonuclease 1
1454	chr10	80583701	80583800	100	0.000188117	3' UTR	216169	ENSMUST00000189605.1	2824	ENSMUSG00000003346	Abhd17a	abhydrolase domain containing 17A
1455	chr10	80586501	80586600	100	9.07675e-05	Exon (ENSMUST00000003436.11/216169, exon 2 of 5)	216169	ENSMUST00000189605.1	24	ENSMUSG00000003346	Abhd17a	abhydrolase domain containing 17A
1456	chr10	80638401	80638500	100	0.000188117	Exon (ENSMUST00000079773.13/103236, exon 5 of 11)	103236	ENSMUST00000218093.1	131	ENSMUSG00000003345	Csnk1g2	casein kinase 1, gamma 2
1457	chr10	80665301	80665700	400	0.000235794	3' UTR	17347	ENSMUST00000003433.10	6276	ENSMUSG00000020190	Mknk2	MAP kinase-interacting serine/threonine kinase 2
1458	chr10	80665901	80666200	300	0.000290066	3' UTR	17347	ENSMUST00000003433.10	5776	ENSMUSG00000020190	Mknk2	MAP kinase-interacting serine/threonine kinase 2
1459	chr10	80666301	80666500	200	2.15411e-05	3' UTR	17347	ENSMUST00000003433.10	5476	ENSMUSG00000020190	Mknk2	MAP kinase-interacting serine/threonine kinase 2
1460	chr10	80667001	80667200	200	4.73796e-05	3' UTR	17347	ENSMUST00000003433.10	4776	ENSMUSG00000020190	Mknk2	MAP kinase-interacting serine/threonine kinase 2
1461	chr10	80669001	80669200	200	0.000209798	Exon (ENSMUST00000200082.4/17347, exon 9 of 14)	17347	ENSMUST00000003433.10	2776	ENSMUSG00000020190	Mknk2	MAP kinase-interacting serine/threonine kinase 2
1462	chr10	80669301	80669400	100	9.07675e-05	Exon (ENSMUST00000200082.4/17347, exon 8 of 14)	17347	ENSMUST00000003433.10	2576	ENSMUSG00000020190	Mknk2	MAP kinase-interacting serine/threonine kinase 2
1463	chr10	80670001	80670100	100	9.07675e-05	Intron (ENSMUST00000200082.4/17347, intron 5 of 13)	17347	ENSMUST00000003433.10	1876	ENSMUSG00000020190	Mknk2	MAP kinase-interacting serine/threonine kinase 2
1464	chr10	80674601	80674700	100	0.000736488	Intron (ENSMUST00000200082.4/17347, intron 2 of 13)	17347	ENSMUST00000200082.4	1593	ENSMUSG00000020190	Mknk2	MAP kinase-interacting serine/threonine kinase 2
1465	chr10	80707701	80707800	100	9.07675e-05	3' UTR	11776	ENSMUST00000219816.1	1258	ENSMUSG00000020198	Ap3d1	adaptor-related protein complex 3, delta 1 subunit
1466	chr10	80709201	80709300	100	9.07675e-05	3' UTR	11776	ENSMUST00000219816.1	-143	ENSMUSG00000020198	Ap3d1	adaptor-related protein complex 3, delta 1 subunit
1467	chr10	80719101	80719200	100	4.29435e-05	Exon (ENSMUST00000020420.8/11776, exon 13 of 31)	11776	ENSMUST00000218125.1	-115	ENSMUSG00000020198	Ap3d1	adaptor-related protein complex 3, delta 1 subunit
1468	chr10	80721201	80721300	100	8.97631e-06	Intron (ENSMUST00000020420.8/11776, intron 10 of 30)	11776	ENSMUST00000220183.1	-11	ENSMUSG00000020198	Ap3d1	adaptor-related protein complex 3, delta 1 subunit
1469	chr10	80792101	80792200	100	0.000376653	3' UTR	208266	ENSMUST00000138505.1	647	ENSMUSG00000061589	Dot1l	DOT1-like, histone H3 methyltransferase (S. cerevisiae)
1470	chr10	80794901	80795000	100	0.000376653	3' UTR	78670	ENSMUST00000219959.1	1817	ENSMUSG00000035278	Plekhj1	pleckstrin homology domain containing, family J member 1
1471	chr10	80826601	80826800	200	1.00969e-05	Promoter	18245	ENSMUST00000060987.14	0	ENSMUSG00000035242	Oaz1	ornithine decarboxylase antizyme 1
1472	chr10	80828401	80828600	200	0.000188326	Promoter	18245	ENSMUST00000179341.1	0	ENSMUSG00000035242	Oaz1	ornithine decarboxylase antizyme 1
1473	chr10	80828701	80828800	100	8.97631e-06	Promoter	100316778	ENSMUST00000157368.1	0	ENSMUSG00000087993	Mir1982	microRNA 1982
1474	chr10	80828901	80829100	200	0.000188117	3' UTR	100316778	ENSMUST00000157368.1	104	ENSMUSG00000087993	Mir1982	microRNA 1982
1475	chr10	80899901	80900000	100	8.97631e-06	3' UTR	30055	ENSMUST00000218149.1	782	ENSMUSG00000020219	Timm13	translocase of inner mitochondrial membrane 13
1476	chr10	81108701	81108800	100	9.07675e-05	5' UTR	26396	ENSMUST00000136743.1	2356	ENSMUSG00000035027	Map2k2	mitogen-activated protein kinase kinase 2
1477	chr10	81120101	81120200	100	0.000736488	Intron (ENSMUST00000143517.7/26396, intron 7 of 10)	26396	ENSMUST00000128937.1	-654	ENSMUSG00000035027	Map2k2	mitogen-activated protein kinase kinase 2
1478	chr10	81122001	81122100	100	0.000736488	Exon (ENSMUST00000128937.1/26396, exon 2 of 2)	26396	ENSMUST00000123241.1	-60	ENSMUSG00000035027	Map2k2	mitogen-activated protein kinase kinase 2
1479	chr10	81144101	81144200	100	0.000188117	Exon (ENSMUST00000125261.1/16969, exon 2 of 2)	16969	ENSMUST00000117956.1	6148	ENSMUSG00000035011	Zbtb7a	zinc finger and BTB domain containing 7a
1480	chr10	81144801	81144900	100	0.000736488	Exon (ENSMUST00000048128.14/16969, exon 2 of 3)	16969	ENSMUST00000117956.1	6848	ENSMUSG00000035011	Zbtb7a	zinc finger and BTB domain containing 7a
1481	chr10	81148101	81148200	100	0.000736488	Exon (ENSMUST00000048128.14/16969, exon 3 of 3)	59004	ENSMUST00000134017.1	7924	ENSMUSG00000004934	Pias4	protein inhibitor of activated STAT 4
1482	chr10	81150301	81150400	100	0.000376653	3' UTR	59004	ENSMUST00000134017.1	5724	ENSMUSG00000004934	Pias4	protein inhibitor of activated STAT 4
1483	chr10	81177601	81177800	200	7.50184e-15	Exon (ENSMUST00000047864.10/13629, exon 2 of 14)	13629	ENSMUST00000047864.10	970	ENSMUSG00000034994	Eef2	eukaryotic translation elongation factor 2
1484	chr10	81178001	81178100	100	5.23872e-15	Exon (ENSMUST00000047864.10/13629, exon 3 of 14)	100217454	ENSMUST00000082507.1	-850	ENSMUSG00000064441	Snord37	small nucleolar RNA, C/D box 37
1485	chr10	81178601	81178800	200	5.12769e-09	Exon (ENSMUST00000047864.10/13629, exon 4 of 14)	100217454	ENSMUST00000082507.1	-150	ENSMUSG00000064441	Snord37	small nucleolar RNA, C/D box 37
1486	chr10	81179001	81180400	1400	2.69038e-05	Promoter	13629	ENSMUST00000219943.1	0	ENSMUSG00000034994	Eef2	eukaryotic translation elongation factor 2
1487	chr10	81180501	81180700	200	5.23872e-15	Exon (ENSMUST00000047864.10/13629, exon 10 of 14)	13629	ENSMUST00000219497.1	-351	ENSMUSG00000034994	Eef2	eukaryotic translation elongation factor 2
1488	chr10	81180801	81181400	600	2.91092e-10	Promoter	13629	ENSMUST00000219497.1	0	ENSMUSG00000034994	Eef2	eukaryotic translation elongation factor 2
1489	chr10	81181501	81181600	100	4.29435e-05	Exon (ENSMUST00000047864.10/13629, exon 13 of 14)	13629	ENSMUST00000219497.1	450	ENSMUSG00000034994	Eef2	eukaryotic translation elongation factor 2
1490	chr10	81181801	81182300	500	2.77233e-08	3' UTR	13144	ENSMUST00000178422.8	-705	ENSMUSG00000034974	Dapk3	death-associated protein kinase 3
1491	chr10	81189901	81190000	100	0.000736488	Exon (ENSMUST00000178422.8/13144, exon 3 of 9)	13144	ENSMUST00000218227.1	-501	ENSMUSG00000034974	Dapk3	death-associated protein kinase 3
1492	chr10	81319101	81319200	100	0.000376653	3' UTR	70312	ENSMUST00000050867.7	-1903	ENSMUSG00000034889	Cactin	cactin, spliceosome C complex subunit
1493	chr10	81529001	81529200	200	0.000462303	3' UTR	14672	ENSMUST00000146984.1	2815	ENSMUSG00000034781	Gna11	guanine nucleotide binding protein, alpha 11
1494	chr10	81565301	81565400	100	2.04892e-13	3' UTR	14797	ENSMUST00000218432.1	39	ENSMUSG00000054452	Tle5	TLE family member 5, transcriptional modulator
1495	chr10	81565701	81565800	100	4.78011e-11	3' UTR	14797	ENSMUST00000218432.1	439	ENSMUSG00000054452	Tle5	TLE family member 5, transcriptional modulator
1496	chr10	81587501	81587600	100	3.99162e-06	Exon (ENSMUST00000140433.7/21886, exon 15 of 19)	21886	ENSMUST00000139135.1	75	ENSMUSG00000034771	Tle2	transducin-like enhancer of split 2
1497	chr10	81717701	81717800	100	0.000376653	Intron (ENSMUST00000200889.3/73610, intron 1 of 3)	73610	ENSMUST00000085664.5	-1119	ENSMUSG00000096795	Zfp433	zinc finger protein 433
1498	chr10	82881701	82881800	100	0.000376653	Exon (ENSMUST00000219368.1/50493, exon 8 of 15)	50493	ENSMUST00000218724.1	-5046	ENSMUSG00000020250	Txnrd1	thioredoxin reductase 1
1499	chr10	82897001	82897200	200	0.000139442	3' UTR	50493	ENSMUST00000218724.1	10155	ENSMUSG00000020250	Txnrd1	thioredoxin reductase 1
1500	chr10	82955101	82955300	200	0.000188326	Distal Intergenic	58250	ENSMUST00000040110.7	-30198	ENSMUSG00000034612	Chst11	carbohydrate sulfotransferase 11
1501	chr10	83603301	83603400	100	1.98676e-05	Promoter	216190	ENSMUST00000141048.1	0	ENSMUSG00000020263	Appl2	adaptor protein, phosphotyrosine interaction, PH domain and leucine zipper containing 2
1502	chr10	83611501	83611700	200	0.00037024	Exon (ENSMUST00000130285.8/216190, exon 1 of 7)	216190	ENSMUST00000150351.1	28	ENSMUSG00000020263	Appl2	adaptor protein, phosphotyrosine interaction, PH domain and leucine zipper containing 2
1503	chr10	83612001	83612100	100	3.26219e-07	Exon (ENSMUST00000147582.7/216190, exon 11 of 14)	216190	ENSMUST00000130285.8	-120	ENSMUSG00000020263	Appl2	adaptor protein, phosphotyrosine interaction, PH domain and leucine zipper containing 2
1504	chr10	83612301	83612500	200	6.68555e-05	Exon (ENSMUST00000147582.7/216190, exon 11 of 14)	216190	ENSMUST00000130285.8	-420	ENSMUSG00000020263	Appl2	adaptor protein, phosphotyrosine interaction, PH domain and leucine zipper containing 2
1505	chr10	83612701	83612800	100	0.000736488	Exon (ENSMUST00000020500.13/216190, exon 11 of 21)	216190	ENSMUST00000130285.8	-820	ENSMUSG00000020263	Appl2	adaptor protein, phosphotyrosine interaction, PH domain and leucine zipper containing 2
1506	chr10	83629901	83630000	100	0.000188117	Intron (ENSMUST00000020500.13/216190, intron 2 of 20)	216190	ENSMUST00000147118.7	-1599	ENSMUSG00000020263	Appl2	adaptor protein, phosphotyrosine interaction, PH domain and leucine zipper containing 2
1507	chr10	83630501	83630600	100	4.29435e-05	Intron (ENSMUST00000020500.13/216190, intron 2 of 20)	216190	ENSMUST00000147118.7	-2199	ENSMUSG00000020263	Appl2	adaptor protein, phosphotyrosine interaction, PH domain and leucine zipper containing 2
1508	chr10	83632301	83632500	200	0.000139442	Intron (ENSMUST00000020500.13/216190, intron 2 of 20)	216190	ENSMUST00000147118.7	-3999	ENSMUSG00000020263	Appl2	adaptor protein, phosphotyrosine interaction, PH domain and leucine zipper containing 2
1509	chr10	83633001	83633200	200	0.000368407	Intron (ENSMUST00000020500.13/216190, intron 2 of 20)	216190	ENSMUST00000133719.2	4243	ENSMUSG00000020263	Appl2	adaptor protein, phosphotyrosine interaction, PH domain and leucine zipper containing 2
1510	chr10	83633301	83633400	100	0.000736488	Intron (ENSMUST00000020500.13/216190, intron 2 of 20)	216190	ENSMUST00000133719.2	4043	ENSMUSG00000020263	Appl2	adaptor protein, phosphotyrosine interaction, PH domain and leucine zipper containing 2
1511	chr10	83634201	83634300	100	9.07675e-05	Intron (ENSMUST00000020500.13/216190, intron 2 of 20)	216190	ENSMUST00000133719.2	3143	ENSMUSG00000020263	Appl2	adaptor protein, phosphotyrosine interaction, PH domain and leucine zipper containing 2
1512	chr10	83636801	83636900	100	0.000376653	Exon (ENSMUST00000133719.2/216190, exon 1 of 8)	216190	ENSMUST00000133719.2	543	ENSMUSG00000020263	Appl2	adaptor protein, phosphotyrosine interaction, PH domain and leucine zipper containing 2
1513	chr10	86693901	86694000	100	0.000736488	Exon (ENSMUST00000129178.7/22027, exon 9 of 13)	22027	ENSMUST00000134515.1	1721	ENSMUSG00000020048	Hsp90b1	heat shock protein 90, beta (Grp94), member 1
1514	chr10	86694301	86694400	100	0.000736488	Exon (ENSMUST00000181587.1/66263, exon 5 of 5)	22027	ENSMUST00000134515.1	1321	ENSMUSG00000020048	Hsp90b1	heat shock protein 90, beta (Grp94), member 1
1515	chr10	86695701	86695800	100	0.000736488	Promoter	22027	ENSMUST00000134515.1	0	ENSMUSG00000020048	Hsp90b1	heat shock protein 90, beta (Grp94), member 1
1516	chr10	86701701	86701800	100	1.98676e-05	Exon (ENSMUST00000129178.7/22027, exon 1 of 13)	22027	ENSMUST00000129178.7	168	ENSMUSG00000020048	Hsp90b1	heat shock protein 90, beta (Grp94), member 1
1517	chr10	88743601	88743700	100	0.000736488	3' UTR	70683	ENSMUST00000218990.1	4131	ENSMUSG00000004356	Utp20	UTP20 small subunit processome component
1518	chr10	89454501	89454600	100	0.000736488	3' UTR	237436	ENSMUST00000105298.2	-10534	ENSMUSG00000074802	Gas2l3	growth arrest-specific 2 like 3
1519	chr10	89458001	89458100	100	0.000188117	Intron (ENSMUST00000058126.14/20186, intron 7 of 8)	237436	ENSMUST00000105298.2	-14034	ENSMUSG00000074802	Gas2l3	growth arrest-specific 2 like 3
1520	chr10	89476601	89476700	100	0.000736488	Intron (ENSMUST00000058126.14/20186, intron 6 of 8)	20186	ENSMUST00000058126.14	29949	ENSMUSG00000047638	Nr1h4	nuclear receptor subfamily 1, group H, member 4
1521	chr10	89481401	89481500	100	9.07675e-05	Intron (ENSMUST00000058126.14/20186, intron 3 of 8)	20186	ENSMUST00000058126.14	25149	ENSMUSG00000047638	Nr1h4	nuclear receptor subfamily 1, group H, member 4
1522	chr10	89482301	89482400	100	1.98676e-05	Intron (ENSMUST00000058126.14/20186, intron 3 of 8)	20186	ENSMUST00000058126.14	24249	ENSMUSG00000047638	Nr1h4	nuclear receptor subfamily 1, group H, member 4
1523	chr10	89483001	89483100	100	0.000376653	Intron (ENSMUST00000058126.14/20186, intron 3 of 8)	20186	ENSMUST00000058126.14	23549	ENSMUSG00000047638	Nr1h4	nuclear receptor subfamily 1, group H, member 4
1524	chr10	89488301	89488400	100	9.07675e-05	Intron (ENSMUST00000058126.14/20186, intron 2 of 8)	20186	ENSMUST00000058126.14	18249	ENSMUSG00000047638	Nr1h4	nuclear receptor subfamily 1, group H, member 4
1525	chr10	89490001	89490100	100	0.000376653	Intron (ENSMUST00000058126.14/20186, intron 2 of 8)	20186	ENSMUST00000058126.14	16549	ENSMUSG00000047638	Nr1h4	nuclear receptor subfamily 1, group H, member 4
1526	chr10	89491401	89491500	100	1.98676e-05	Intron (ENSMUST00000058126.14/20186, intron 2 of 8)	20186	ENSMUST00000058126.14	15149	ENSMUSG00000047638	Nr1h4	nuclear receptor subfamily 1, group H, member 4
1527	chr10	89494101	89494200	100	4.29435e-05	Intron (ENSMUST00000058126.14/20186, intron 2 of 8)	20186	ENSMUST00000058126.14	12449	ENSMUSG00000047638	Nr1h4	nuclear receptor subfamily 1, group H, member 4
1528	chr10	89495101	89495300	200	5.53176e-05	Intron (ENSMUST00000058126.14/20186, intron 2 of 8)	20186	ENSMUST00000058126.14	11349	ENSMUSG00000047638	Nr1h4	nuclear receptor subfamily 1, group H, member 4
1529	chr10	89495501	89495600	100	4.29435e-05	Intron (ENSMUST00000058126.14/20186, intron 2 of 8)	20186	ENSMUST00000058126.14	11049	ENSMUSG00000047638	Nr1h4	nuclear receptor subfamily 1, group H, member 4
1530	chr10	89497001	89497100	100	0.000376653	Intron (ENSMUST00000058126.14/20186, intron 2 of 8)	20186	ENSMUST00000058126.14	9549	ENSMUSG00000047638	Nr1h4	nuclear receptor subfamily 1, group H, member 4
1531	chr10	89498001	89498200	200	1.75441e-07	Exon (ENSMUST00000058126.14/20186, exon 2 of 9)	20186	ENSMUST00000058126.14	8449	ENSMUSG00000047638	Nr1h4	nuclear receptor subfamily 1, group H, member 4
1532	chr10	89745001	89745100	100	0.000736488	5' UTR	75089	ENSMUST00000020112.6	10	ENSMUSG00000019951	Uhrf1bp1l	UHRF1 (ICBP90) binding protein 1-like
1533	chr10	91116801	91117100	300	3.00091e-06	3' UTR	18674	ENSMUST00000167455.7	2737	ENSMUSG00000061904	Slc25a3	solute carrier family 25 (mitochondrial carrier, phosphate carrier), member 3
1534	chr10	91119501	91119600	100	8.97631e-06	3' UTR	18674	ENSMUST00000167455.7	237	ENSMUSG00000061904	Slc25a3	solute carrier family 25 (mitochondrial carrier, phosphate carrier), member 3
1535	chr10	91122101	91122200	100	0.000736488	3' UTR	18674	ENSMUST00000171960.1	23	ENSMUSG00000061904	Slc25a3	solute carrier family 25 (mitochondrial carrier, phosphate carrier), member 3
1536	chr10	91122301	91122400	100	0.000188117	Exon (ENSMUST00000163246.7/18674, exon 3 of 8)	18674	ENSMUST00000171960.1	-78	ENSMUSG00000061904	Slc25a3	solute carrier family 25 (mitochondrial carrier, phosphate carrier), member 3
1537	chr10	91122501	91122600	100	7.60547e-07	Exon (ENSMUST00000172442.1/18674, exon 2 of 2)	18674	ENSMUST00000171960.1	-278	ENSMUSG00000061904	Slc25a3	solute carrier family 25 (mitochondrial carrier, phosphate carrier), member 3
1538	chr10	91122801	91122900	100	1.98676e-05	Exon (ENSMUST00000172442.1/18674, exon 2 of 2)	18674	ENSMUST00000171960.1	-578	ENSMUSG00000061904	Slc25a3	solute carrier family 25 (mitochondrial carrier, phosphate carrier), member 3
1539	chr10	91123201	91123300	100	3.26219e-07	Exon (ENSMUST00000172442.1/18674, exon 2 of 2)	18674	ENSMUST00000164505.1	655	ENSMUSG00000061904	Slc25a3	solute carrier family 25 (mitochondrial carrier, phosphate carrier), member 3
1540	chr10	91123401	91123500	100	1.38616e-07	Exon (ENSMUST00000172442.1/18674, exon 2 of 2)	18674	ENSMUST00000164505.1	455	ENSMUSG00000061904	Slc25a3	solute carrier family 25 (mitochondrial carrier, phosphate carrier), member 3
1541	chr10	91154001	91154100	100	0.000376653	Intron (ENSMUST00000072239.13/21917, intron 4 of 8)	21917	ENSMUST00000213262.1	-307	ENSMUSG00000019961	Tmpo	thymopoietin
1542	chr10	91154501	91154600	100	0.000376653	Intron (ENSMUST00000072239.13/21917, intron 4 of 8)	21917	ENSMUST00000213262.1	-807	ENSMUSG00000019961	Tmpo	thymopoietin
1543	chr10	91154801	91154900	100	0.000736488	Intron (ENSMUST00000072239.13/21917, intron 4 of 8)	21917	ENSMUST00000213262.1	-1107	ENSMUSG00000019961	Tmpo	thymopoietin
1544	chr10	91157701	91157800	100	0.000376653	Exon (ENSMUST00000214391.1/21917, exon 4 of 4)	21917	ENSMUST00000213262.1	-4007	ENSMUSG00000019961	Tmpo	thymopoietin
1545	chr10	91158301	91158400	100	0.000188117	Exon (ENSMUST00000214391.1/21917, exon 4 of 4)	21917	ENSMUST00000213262.1	-4607	ENSMUSG00000019961	Tmpo	thymopoietin
1546	chr10	91162201	91162300	100	0.000376653	Exon (ENSMUST00000020123.6/21917, exon 4 of 4)	21917	ENSMUST00000217449.1	8162	ENSMUSG00000019961	Tmpo	thymopoietin
1547	chr10	91162601	91162700	100	0.000736488	Exon (ENSMUST00000020123.6/21917, exon 4 of 4)	21917	ENSMUST00000217449.1	7762	ENSMUSG00000019961	Tmpo	thymopoietin
1548	chr10	91171301	91171400	100	0.000376653	5' UTR	21917	ENSMUST00000214391.1	124	ENSMUSG00000019961	Tmpo	thymopoietin
1549	chr10	93860901	93861000	100	0.000736488	3' UTR	56307	ENSMUST00000181894.1	3070	ENSMUSG00000036112	Metap2	methionine aminopeptidase 2
1550	chr10	94000901	94001000	100	0.000376653	Intron (ENSMUST00000119818.7/215008, intron 3 of 11)	215008	ENSMUST00000141241.1	-3924	ENSMUSG00000036099	Vezt	vezatin, adherens junctions transmembrane protein
1551	chr10	95547101	95547200	100	3.99162e-06	3' UTR	93765	ENSMUST00000217757.1	5588	ENSMUSG00000074781	Ube2n	ubiquitin-conjugating enzyme E2N
1552	chr10	95548201	95548300	100	0.000188117	3' UTR	93765	ENSMUST00000217757.1	6688	ENSMUSG00000074781	Ube2n	ubiquitin-conjugating enzyme E2N
1553	chr10	95940701	95940800	100	8.97631e-06	Promoter	216238	ENSMUST00000218088.1	0	ENSMUSG00000036499	Eea1	early endosome antigen 1
1554	chr10	95984501	95984700	200	0.000736488	Intron (ENSMUST00000218291.1/216238, intron 2 of 17)	216238	ENSMUST00000218517.1	43744	ENSMUSG00000036499	Eea1	early endosome antigen 1
1555	chr10	95985001	95985100	100	8.97631e-06	Intron (ENSMUST00000218291.1/216238, intron 2 of 17)	216238	ENSMUST00000218517.1	44244	ENSMUSG00000036499	Eea1	early endosome antigen 1
1556	chr10	95985701	95985900	200	4.62611e-05	Intron (ENSMUST00000218291.1/216238, intron 2 of 17)	216238	ENSMUST00000218517.1	44944	ENSMUSG00000036499	Eea1	early endosome antigen 1
1557	chr10	95986101	95986200	100	3.99162e-06	Intron (ENSMUST00000218291.1/216238, intron 2 of 17)	216238	ENSMUST00000218517.1	45344	ENSMUSG00000036499	Eea1	early endosome antigen 1
1558	chr10	95986601	95986700	100	0.000188117	Intron (ENSMUST00000218291.1/216238, intron 2 of 17)	216238	ENSMUST00000218517.1	45844	ENSMUSG00000036499	Eea1	early endosome antigen 1
1559	chr10	96010301	96010400	100	0.000376653	Intron (ENSMUST00000218291.1/216238, intron 9 of 17)	216238	ENSMUST00000218517.1	69544	ENSMUSG00000036499	Eea1	early endosome antigen 1
1560	chr10	96618301	96618400	100	4.29435e-05	5' UTR	12226	ENSMUST00000218953.1	747	ENSMUSG00000036478	Btg1	BTG anti-proliferation factor 1
1561	chr10	96618501	96618700	200	0.000736488	3' UTR	12226	ENSMUST00000218953.1	947	ENSMUSG00000036478	Btg1	BTG anti-proliferation factor 1
1562	chr10	96618801	96619000	200	0.000372732	3' UTR	12226	ENSMUST00000218953.1	1247	ENSMUSG00000036478	Btg1	BTG anti-proliferation factor 1
1563	chr10	96619101	96619200	100	0.000736488	3' UTR	12226	ENSMUST00000218953.1	1547	ENSMUSG00000036478	Btg1	BTG anti-proliferation factor 1
1564	chr10	96619801	96619900	100	0.000376653	3' UTR	12226	ENSMUST00000218953.1	2247	ENSMUSG00000036478	Btg1	BTG anti-proliferation factor 1
1565	chr10	97531601	97531700	100	1.98676e-05	Distal Intergenic	17022	ENSMUST00000038160.5	-33428	ENSMUSG00000036446	Lum	lumican
1566	chr10	99264101	99264200	100	0.000736488	Intron (ENSMUST00000020118.4/67603, intron 1 of 2)	67603	ENSMUST00000219988.1	-77	ENSMUSG00000019960	Dusp6	dual specificity phosphatase 6
1567	chr10	99915301	99915400	100	0.000376653	Distal Intergenic	17311	ENSMUST00000105283.8	-100230	ENSMUSG00000019966	Kitl	kit ligand
1568	chr10	100015801	100015900	100	2.92063e-10	Promoter	17311	ENSMUST00000219050.1	0	ENSMUSG00000019966	Kitl	kit ligand
1569	chr10	100019901	100020000	100	0.000736488	Intron (ENSMUST00000105283.8/17311, intron 1 of 9)	17311	ENSMUST00000020129.7	3985	ENSMUSG00000019966	Kitl	kit ligand
1570	chr10	100029401	100029500	100	0.000188117	Intron (ENSMUST00000105283.8/17311, intron 1 of 9)	17311	ENSMUST00000020129.7	13485	ENSMUSG00000019966	Kitl	kit ligand
1571	chr10	100055301	100055400	100	0.000736488	Intron (ENSMUST00000105283.8/17311, intron 2 of 9)	17311	ENSMUST00000219881.1	-32656	ENSMUSG00000019966	Kitl	kit ligand
1572	chr10	100062301	100062400	100	0.000736488	Intron (ENSMUST00000105283.8/17311, intron 2 of 9)	17311	ENSMUST00000219881.1	-25656	ENSMUSG00000019966	Kitl	kit ligand
1573	chr10	100078301	100078400	100	0.000376653	Intron (ENSMUST00000105283.8/17311, intron 4 of 9)	17311	ENSMUST00000219881.1	-9656	ENSMUSG00000019966	Kitl	kit ligand
1574	chr10	100096001	100096200	200	0.000209798	3' UTR	17311	ENSMUST00000219881.1	7945	ENSMUSG00000019966	Kitl	kit ligand
1575	chr10	100096501	100096700	200	1.19296e-05	3' UTR	17311	ENSMUST00000219881.1	8445	ENSMUSG00000019966	Kitl	kit ligand
1576	chr10	100097701	100097800	100	0.000736488	3' UTR	17311	ENSMUST00000219881.1	9645	ENSMUSG00000019966	Kitl	kit ligand
1577	chr10	103508401	103508500	100	0.000376653	Intron (ENSMUST00000219620.1/ENSMUST00000219620.1, intron 1 of 2)	103098	ENSMUST00000219936.1	114951	ENSMUSG00000019894	Slc6a15	solute carrier family 6 (neurotransmitter transporter), member 15
1578	chr10	103510601	103510700	100	0.000736488	Intron (ENSMUST00000219620.1/ENSMUST00000219620.1, intron 1 of 2)	103098	ENSMUST00000219936.1	117151	ENSMUSG00000019894	Slc6a15	solute carrier family 6 (neurotransmitter transporter), member 15
1579	chr10	103527001	103527100	100	0.000736488	Intron (ENSMUST00000219620.1/ENSMUST00000219620.1, intron 1 of 2)	103098	ENSMUST00000219936.1	133551	ENSMUSG00000019894	Slc6a15	solute carrier family 6 (neurotransmitter transporter), member 15
1580	chr10	103527801	103527900	100	3.99162e-06	Intron (ENSMUST00000219620.1/ENSMUST00000219620.1, intron 1 of 2)	103098	ENSMUST00000219936.1	134351	ENSMUSG00000019894	Slc6a15	solute carrier family 6 (neurotransmitter transporter), member 15
1581	chr10	103530101	103530200	100	9.07675e-05	Intron (ENSMUST00000219620.1/ENSMUST00000219620.1, intron 1 of 2)	103098	ENSMUST00000219936.1	136651	ENSMUSG00000019894	Slc6a15	solute carrier family 6 (neurotransmitter transporter), member 15
1582	chr10	103530301	103530400	100	0.000736488	Intron (ENSMUST00000219620.1/ENSMUST00000219620.1, intron 1 of 2)	103098	ENSMUST00000219936.1	136851	ENSMUSG00000019894	Slc6a15	solute carrier family 6 (neurotransmitter transporter), member 15
1583	chr10	103533601	103533700	100	0.000736488	Intron (ENSMUST00000219620.1/ENSMUST00000219620.1, intron 1 of 2)	103098	ENSMUST00000219936.1	140151	ENSMUSG00000019894	Slc6a15	solute carrier family 6 (neurotransmitter transporter), member 15
1584	chr10	103544101	103544200	100	0.000376653	Intron (ENSMUST00000219620.1/ENSMUST00000219620.1, intron 1 of 2)	103098	ENSMUST00000219936.1	150651	ENSMUSG00000019894	Slc6a15	solute carrier family 6 (neurotransmitter transporter), member 15
1585	chr10	103546301	103546400	100	8.97631e-06	Intron (ENSMUST00000219620.1/ENSMUST00000219620.1, intron 1 of 2)	103098	ENSMUST00000219936.1	152851	ENSMUSG00000019894	Slc6a15	solute carrier family 6 (neurotransmitter transporter), member 15
1586	chr10	103550701	103550800	100	0.000736488	Intron (ENSMUST00000219620.1/ENSMUST00000219620.1, intron 1 of 2)	103098	ENSMUST00000219936.1	157251	ENSMUSG00000019894	Slc6a15	solute carrier family 6 (neurotransmitter transporter), member 15
1587	chr10	103554201	103554300	100	0.000736488	Intron (ENSMUST00000219620.1/ENSMUST00000219620.1, intron 1 of 2)	103098	ENSMUST00000219936.1	160751	ENSMUSG00000019894	Slc6a15	solute carrier family 6 (neurotransmitter transporter), member 15
1588	chr10	103554401	103554500	100	0.000736488	Intron (ENSMUST00000219620.1/ENSMUST00000219620.1, intron 1 of 2)	103098	ENSMUST00000219936.1	160951	ENSMUSG00000019894	Slc6a15	solute carrier family 6 (neurotransmitter transporter), member 15
1589	chr10	103554701	103554800	100	1.98676e-05	Intron (ENSMUST00000219620.1/ENSMUST00000219620.1, intron 1 of 2)	103098	ENSMUST00000219936.1	161251	ENSMUSG00000019894	Slc6a15	solute carrier family 6 (neurotransmitter transporter), member 15
1590	chr10	103554901	103555000	100	0.000736488	Intron (ENSMUST00000219620.1/ENSMUST00000219620.1, intron 1 of 2)	103098	ENSMUST00000219936.1	161451	ENSMUSG00000019894	Slc6a15	solute carrier family 6 (neurotransmitter transporter), member 15
1591	chr10	103557001	103557100	100	0.000376653	Intron (ENSMUST00000219620.1/ENSMUST00000219620.1, intron 1 of 2)	103098	ENSMUST00000219936.1	163551	ENSMUSG00000019894	Slc6a15	solute carrier family 6 (neurotransmitter transporter), member 15
1592	chr10	103557201	103557300	100	0.000376653	Intron (ENSMUST00000219620.1/ENSMUST00000219620.1, intron 1 of 2)	103098	ENSMUST00000219936.1	163751	ENSMUSG00000019894	Slc6a15	solute carrier family 6 (neurotransmitter transporter), member 15
1593	chr10	103558801	103558900	100	0.000376653	Intron (ENSMUST00000219620.1/ENSMUST00000219620.1, intron 1 of 2)	103098	ENSMUST00000219936.1	165351	ENSMUSG00000019894	Slc6a15	solute carrier family 6 (neurotransmitter transporter), member 15
1594	chr10	103560201	103560300	100	0.000736488	Intron (ENSMUST00000219620.1/ENSMUST00000219620.1, intron 1 of 2)	103098	ENSMUST00000219936.1	166751	ENSMUSG00000019894	Slc6a15	solute carrier family 6 (neurotransmitter transporter), member 15
1595	chr10	103561001	103561100	100	0.000736488	Intron (ENSMUST00000219620.1/ENSMUST00000219620.1, intron 1 of 2)	103098	ENSMUST00000219936.1	167551	ENSMUSG00000019894	Slc6a15	solute carrier family 6 (neurotransmitter transporter), member 15
1596	chr10	103562601	103562700	100	0.000376653	Intron (ENSMUST00000219620.1/ENSMUST00000219620.1, intron 1 of 2)	103098	ENSMUST00000219936.1	169151	ENSMUSG00000019894	Slc6a15	solute carrier family 6 (neurotransmitter transporter), member 15
1597	chr10	103563201	103563300	100	8.97631e-06	Intron (ENSMUST00000219620.1/ENSMUST00000219620.1, intron 1 of 2)	103098	ENSMUST00000219936.1	169751	ENSMUSG00000019894	Slc6a15	solute carrier family 6 (neurotransmitter transporter), member 15
1598	chr10	103566201	103566300	100	0.000376653	Exon (ENSMUST00000219620.1/ENSMUST00000219620.1, exon 3 of 3)	103098	ENSMUST00000219936.1	172751	ENSMUSG00000019894	Slc6a15	solute carrier family 6 (neurotransmitter transporter), member 15
1599	chr10	103567001	103567200	200	1.75441e-07	Intron (ENSMUST00000218784.1/ENSMUST00000218784.1, intron 1 of 1)	103098	ENSMUST00000219936.1	173551	ENSMUSG00000019894	Slc6a15	solute carrier family 6 (neurotransmitter transporter), member 15
1600	chr10	103567301	103567400	100	0.000376653	Intron (ENSMUST00000218784.1/ENSMUST00000218784.1, intron 1 of 1)	103098	ENSMUST00000219936.1	173851	ENSMUSG00000019894	Slc6a15	solute carrier family 6 (neurotransmitter transporter), member 15
1601	chr10	103567501	103567800	300	0.000139912	Exon (ENSMUST00000218950.1/ENSMUST00000218950.1, exon 1 of 1)	103098	ENSMUST00000219936.1	174051	ENSMUSG00000019894	Slc6a15	solute carrier family 6 (neurotransmitter transporter), member 15
1602	chr10	103576301	103576400	100	0.000188117	Distal Intergenic	103098	ENSMUST00000219936.1	182851	ENSMUSG00000019894	Slc6a15	solute carrier family 6 (neurotransmitter transporter), member 15
1603	chr10	103577701	103577800	100	0.000188117	Distal Intergenic	103098	ENSMUST00000219936.1	184251	ENSMUSG00000019894	Slc6a15	solute carrier family 6 (neurotransmitter transporter), member 15
1604	chr10	103578101	103578200	100	0.000188117	Distal Intergenic	103098	ENSMUST00000219936.1	184651	ENSMUSG00000019894	Slc6a15	solute carrier family 6 (neurotransmitter transporter), member 15
1605	chr10	103579001	103579100	100	0.000376653	Distal Intergenic	103098	ENSMUST00000219936.1	185551	ENSMUSG00000019894	Slc6a15	solute carrier family 6 (neurotransmitter transporter), member 15
1606	chr10	103579801	103580000	200	0.000103992	Distal Intergenic	103098	ENSMUST00000219936.1	186351	ENSMUSG00000019894	Slc6a15	solute carrier family 6 (neurotransmitter transporter), member 15
1607	chr10	105238301	105238500	200	5.23872e-15	Intron (ENSMUST00000061506.8/278279, intron 11 of 11)	278279	ENSMUST00000130665.1	-3352	ENSMUSG00000036019	Tmtc2	transmembrane and tetratricopeptide repeat containing 2
1608	chr10	108162401	108162500	100	0.000736488	Exon (ENSMUST00000219263.1/17931, exon 1 of 25)	17931	ENSMUST00000070663.5	1	ENSMUSG00000019907	Ppp1r12a	protein phosphatase 1, regulatory subunit 12A
1609	chr10	108249401	108249500	100	0.000736488	Exon (ENSMUST00000219263.1/17931, exon 10 of 25)	17931	ENSMUST00000219759.1	-94	ENSMUSG00000019907	Ppp1r12a	protein phosphatase 1, regulatory subunit 12A
1610	chr10	108253601	108253700	100	0.000736488	Intron (ENSMUST00000219263.1/17931, intron 14 of 24)	17931	ENSMUST00000218161.1	491	ENSMUSG00000019907	Ppp1r12a	protein phosphatase 1, regulatory subunit 12A
1611	chr10	108261801	108261900	100	0.000736488	Exon (ENSMUST00000218161.1/17931, exon 4 of 11)	17931	ENSMUST00000219653.1	-5197	ENSMUSG00000019907	Ppp1r12a	protein phosphatase 1, regulatory subunit 12A
1612	chr10	108264901	108265000	100	8.97631e-06	Intron (ENSMUST00000219263.1/17931, intron 19 of 24)	17931	ENSMUST00000219653.1	-2097	ENSMUSG00000019907	Ppp1r12a	protein phosphatase 1, regulatory subunit 12A
1613	chr10	108278401	108278500	100	0.000376653	3' UTR	17931	ENSMUST00000219559.1	9831	ENSMUSG00000019907	Ppp1r12a	protein phosphatase 1, regulatory subunit 12A
1614	chr10	108332701	108332800	100	0.000188117	5' UTR	114774	ENSMUST00000218332.1	-17	ENSMUSG00000035873	Pawr	PRKC, apoptosis, WT1, regulator
1615	chr10	108384401	108384500	100	0.000736488	Intron (ENSMUST00000095313.4/114774, intron 3 of 6)	102640148	ENSMUST00000217857.1	-32751	ENSMUSG00000112532	Gm36283	predicted gene, 36283
1616	chr10	108397701	108397800	100	0.000188117	Intron (ENSMUST00000095313.4/114774, intron 4 of 6)	102640148	ENSMUST00000217857.1	-19451	ENSMUSG00000112532	Gm36283	predicted gene, 36283
1617	chr10	111126301	111126400	100	4.29435e-05	Exon (ENSMUST00000171120.2/ENSMUST00000171120.2, exon 1 of 1)	237542	ENSMUST00000105275.8	-38352	ENSMUSG00000020189	Osbpl8	oxysterol binding protein-like 8
1618	chr10	111496201	111496300	100	0.000736488	3' UTR	53605	ENSMUST00000219718.1	2297	ENSMUSG00000058799	Nap1l1	nucleosome assembly protein 1-like 1
1619	chr10	112926801	112926900	100	0.000736488	3' UTR	382423	ENSMUST00000099276.3	2095	ENSMUSG00000074748	Atxn7l3b	ataxin 7-like 3B
1620	chr10	115384901	115385500	600	0.000148138	Promoter	216345	ENSMUST00000036044.8	0	ENSMUSG00000034163	Zfc3h1	zinc finger, C3H1-type containing
1621	chr10	115386301	115386400	100	0.000188117	Intron (ENSMUST00000036044.8/216345, intron 1 of 34)	216345	ENSMUST00000036044.8	1342	ENSMUSG00000034163	Zfc3h1	zinc finger, C3H1-type containing
1622	chr10	115387601	115387700	100	9.07675e-05	Intron (ENSMUST00000036044.8/216345, intron 1 of 34)	216345	ENSMUST00000036044.8	2642	ENSMUSG00000034163	Zfc3h1	zinc finger, C3H1-type containing
1623	chr10	115388601	115388700	100	9.07675e-05	Intron (ENSMUST00000036044.8/216345, intron 1 of 34)	216345	ENSMUST00000036044.8	3642	ENSMUSG00000034163	Zfc3h1	zinc finger, C3H1-type containing
1624	chr10	115389301	115389400	100	0.000736488	Intron (ENSMUST00000036044.8/216345, intron 1 of 34)	216345	ENSMUST00000036044.8	4342	ENSMUSG00000034163	Zfc3h1	zinc finger, C3H1-type containing
1625	chr10	115390801	115390900	100	0.000376653	Exon (ENSMUST00000036044.8/216345, exon 2 of 35)	216345	ENSMUST00000036044.8	5842	ENSMUSG00000034163	Zfc3h1	zinc finger, C3H1-type containing
1626	chr10	115411701	115411800	100	0.000736488	Exon (ENSMUST00000036044.8/216345, exon 15 of 35)	216345	ENSMUST00000127283.1	-15505	ENSMUSG00000034163	Zfc3h1	zinc finger, C3H1-type containing
1627	chr10	115431901	115432000	100	9.07675e-05	Exon (ENSMUST00000036044.8/216345, exon 35 of 35)	216345	ENSMUST00000141246.1	822	ENSMUSG00000034163	Zfc3h1	zinc finger, C3H1-type containing
1628	chr10	116485201	116485300	100	0.000736488	3' UTR	100504412	ENSMUST00000123348.1	10856	ENSMUSG00000085837	Kcnmb4os2	potassium large conductance calcium-activated channel, subfamily M, beta member 4, opposite strand 2
1629	chr10	116508801	116508900	100	0.000736488	Intron (ENSMUST00000168036.7/72068, intron 3 of 14)	72068	ENSMUST00000219544.1	-9323	ENSMUSG00000020166	Cnot2	CCR4-NOT transcription complex, subunit 2
1630	chr10	116525301	116525400	100	9.07675e-05	Intron (ENSMUST00000220305.1/ENSMUST00000220305.1, intron 2 of 2)	72068	ENSMUST00000164088.7	23763	ENSMUSG00000020166	Cnot2	CCR4-NOT transcription complex, subunit 2
1631	chr10	116920401	116920500	100	0.000376653	Intron (ENSMUST00000020375.6/216363, intron 3 of 9)	216363	ENSMUST00000219570.1	-468	ENSMUSG00000064181	Rab3ip	RAB3A interacting protein
1632	chr10	116923701	116923800	100	0.000736488	Intron (ENSMUST00000020375.6/216363, intron 3 of 9)	216363	ENSMUST00000219570.1	-3768	ENSMUSG00000064181	Rab3ip	RAB3A interacting protein
1633	chr10	116924201	116924300	100	9.07675e-05	Intron (ENSMUST00000020375.6/216363, intron 3 of 9)	216363	ENSMUST00000219570.1	-4268	ENSMUSG00000064181	Rab3ip	RAB3A interacting protein
1634	chr10	116924401	116924500	100	0.000736488	Intron (ENSMUST00000020375.6/216363, intron 3 of 9)	216363	ENSMUST00000219570.1	-4468	ENSMUSG00000064181	Rab3ip	RAB3A interacting protein
1635	chr10	116925401	116925500	100	0.000376653	Intron (ENSMUST00000020375.6/216363, intron 3 of 9)	216363	ENSMUST00000219570.1	-5468	ENSMUSG00000064181	Rab3ip	RAB3A interacting protein
1636	chr10	116933101	116933200	100	0.000188117	Intron (ENSMUST00000020375.6/216363, intron 3 of 9)	216363	ENSMUST00000219570.1	-13168	ENSMUSG00000064181	Rab3ip	RAB3A interacting protein
1637	chr10	116937401	116937500	100	0.000376653	Exon (ENSMUST00000020375.6/216363, exon 3 of 10)	71086	ENSMUST00000220066.1	-12257	ENSMUSG00000112627	4933412E12Rik	RIKEN cDNA 4933412E12 gene
1638	chr10	117051001	117051100	100	0.000376653	3' UTR	12461	ENSMUST00000219690.1	3801	ENSMUSG00000034024	Cct2	chaperonin containing Tcp1, subunit 2 (beta)
1639	chr10	117215501	117215600	100	0.000376653	3' UTR	64050	ENSMUST00000219609.1	1758	ENSMUSG00000020171	Yeats4	YEATS domain containing 4
1640	chr10	117274701	117274800	100	1.98676e-05	Distal Intergenic	17105	ENSMUST00000092163.8	7521	ENSMUSG00000069516	Lyz2	lysozyme 2
1641	chr10	117355901	117356000	100	0.000736488	3' UTR	432508	ENSMUST00000175888.1	56	ENSMUSG00000055531	Cpsf6	cleavage and polyadenylation specific factor 6
1642	chr10	117360901	117361100	200	0.000736488	Promoter	432508	ENSMUST00000176480.7	0	ENSMUSG00000055531	Cpsf6	cleavage and polyadenylation specific factor 6
1643	chr10	117362501	117362600	100	0.000736488	Exon (ENSMUST00000176567.1/432508, exon 1 of 3)	432508	ENSMUST00000176567.1	633	ENSMUSG00000055531	Cpsf6	cleavage and polyadenylation specific factor 6
1644	chr10	117367801	117367900	100	7.60547e-07	Exon (ENSMUST00000069168.12/432508, exon 2 of 10)	432508	ENSMUST00000176567.1	-4568	ENSMUSG00000055531	Cpsf6	cleavage and polyadenylation specific factor 6
1645	chr10	117689001	117689100	100	0.000376653	3' UTR	17246	ENSMUST00000131627.1	2420	ENSMUSG00000020184	Mdm2	transformed mouse 3T3 cell double minute 2
1646	chr10	117700801	117700900	100	0.000736488	Intron (ENSMUST00000020408.15/17246, intron 6 of 11)	17246	ENSMUST00000155285.7	9122	ENSMUSG00000020184	Mdm2	transformed mouse 3T3 cell double minute 2
1647	chr10	117701101	117701200	100	0.000736488	Intron (ENSMUST00000020408.15/17246, intron 6 of 11)	17246	ENSMUST00000155285.7	8822	ENSMUSG00000020184	Mdm2	transformed mouse 3T3 cell double minute 2
1648	chr10	117701801	117701900	100	4.29435e-05	Intron (ENSMUST00000020408.15/17246, intron 5 of 11)	17246	ENSMUST00000155285.7	8122	ENSMUSG00000020184	Mdm2	transformed mouse 3T3 cell double minute 2
1649	chr10	117707001	117707100	100	0.000736488	Intron (ENSMUST00000020408.15/17246, intron 3 of 11)	17246	ENSMUST00000155285.7	2922	ENSMUSG00000020184	Mdm2	transformed mouse 3T3 cell double minute 2
1650	chr10	117709501	117709600	100	0.000736488	Intron (ENSMUST00000020408.15/17246, intron 3 of 11)	17246	ENSMUST00000155285.7	422	ENSMUSG00000020184	Mdm2	transformed mouse 3T3 cell double minute 2
1651	chr10	117815501	117815600	100	0.000736488	3' UTR	215449	ENSMUST00000220214.1	2940	ENSMUSG00000052681	Rap1b	RAS related protein 1b
1652	chr10	117816501	117816600	100	0.000736488	Intron (ENSMUST00000064667.8/215449, intron 7 of 7)	215449	ENSMUST00000220214.1	1940	ENSMUSG00000052681	Rap1b	RAS related protein 1b
1653	chr10	119213501	119213600	100	4.29435e-05	Exon (ENSMUST00000020315.12/71902, exon 8 of 15)	71902	ENSMUST00000149155.1	-892	ENSMUSG00000020114	Cand1	cullin associated and neddylation disassociated 1
1654	chr10	120361701	120361800	100	0.000188117	3' UTR	320626	ENSMUST00000161291.1	-27723	ENSMUSG00000090191	9230105E05Rik	RIKEN cDNA 9230105E05 gene
1655	chr10	120381501	120381600	100	0.000376653	Intron (ENSMUST00000041178.11/ENSMUST00000041178.11, intron 2 of 2)	320626	ENSMUST00000161291.1	-7923	ENSMUSG00000090191	9230105E05Rik	RIKEN cDNA 9230105E05 gene
1656	chr10	120384701	120384800	100	9.07675e-05	Intron (ENSMUST00000072777.13/15364, intron 3 of 4)	320626	ENSMUST00000161291.1	-4723	ENSMUSG00000090191	9230105E05Rik	RIKEN cDNA 9230105E05 gene
1657	chr10	120389701	120389800	100	0.000376653	Exon (ENSMUST00000161291.1/320626, exon 2 of 3)	320626	ENSMUST00000161291.1	178	ENSMUSG00000090191	9230105E05Rik	RIKEN cDNA 9230105E05 gene
1658	chr10	120424101	120424200	100	0.000376653	Intron (ENSMUST00000072777.13/15364, intron 3 of 4)	791076	ENSMUST00000103249.1	23910	ENSMUSG00000076448	Mir763	microRNA 763
1659	chr10	120428601	120428700	100	1.98676e-05	Intron (ENSMUST00000072777.13/15364, intron 3 of 4)	791076	ENSMUST00000103249.1	19410	ENSMUSG00000076448	Mir763	microRNA 763
1660	chr10	120432001	120432100	100	0.000736488	Intron (ENSMUST00000072777.13/15364, intron 3 of 4)	791076	ENSMUST00000103249.1	16010	ENSMUSG00000076448	Mir763	microRNA 763
1661	chr10	120432801	120432900	100	0.000736488	Intron (ENSMUST00000072777.13/15364, intron 3 of 4)	791076	ENSMUST00000103249.1	15210	ENSMUSG00000076448	Mir763	microRNA 763
1662	chr10	120433601	120433700	100	4.29435e-05	Intron (ENSMUST00000072777.13/15364, intron 3 of 4)	791076	ENSMUST00000103249.1	14410	ENSMUSG00000076448	Mir763	microRNA 763
1663	chr10	120439401	120439500	100	0.000736488	Intron (ENSMUST00000072777.13/15364, intron 3 of 4)	791076	ENSMUST00000103249.1	8610	ENSMUSG00000076448	Mir763	microRNA 763
1664	chr10	120442101	120442200	100	0.000376653	Intron (ENSMUST00000072777.13/15364, intron 3 of 4)	791076	ENSMUST00000103249.1	5910	ENSMUSG00000076448	Mir763	microRNA 763
1665	chr10	120442401	120442500	100	0.000736488	Intron (ENSMUST00000072777.13/15364, intron 3 of 4)	791076	ENSMUST00000103249.1	5610	ENSMUSG00000076448	Mir763	microRNA 763
1666	chr10	120448801	120448900	100	0.000736488	Intron (ENSMUST00000072777.13/15364, intron 3 of 4)	791076	ENSMUST00000103249.1	-691	ENSMUSG00000076448	Mir763	microRNA 763
1667	chr10	120449901	120450000	100	0.000736488	Intron (ENSMUST00000072777.13/15364, intron 3 of 4)	791076	ENSMUST00000103249.1	-1791	ENSMUSG00000076448	Mir763	microRNA 763
1668	chr10	120451501	120451600	100	0.000376653	Intron (ENSMUST00000072777.13/15364, intron 3 of 4)	791076	ENSMUST00000103249.1	-3391	ENSMUSG00000076448	Mir763	microRNA 763
1669	chr10	120453301	120453400	100	9.07675e-05	Intron (ENSMUST00000072777.13/15364, intron 3 of 4)	791076	ENSMUST00000103249.1	-5191	ENSMUSG00000076448	Mir763	microRNA 763
1670	chr10	120459101	120459200	100	0.000736488	Intron (ENSMUST00000072777.13/15364, intron 3 of 4)	791076	ENSMUST00000103249.1	-10991	ENSMUSG00000076448	Mir763	microRNA 763
1671	chr10	120461001	120461100	100	0.000188117	Intron (ENSMUST00000072777.13/15364, intron 3 of 4)	791076	ENSMUST00000103249.1	-12891	ENSMUSG00000076448	Mir763	microRNA 763
1672	chr10	120461601	120461700	100	0.000736488	Intron (ENSMUST00000072777.13/15364, intron 3 of 4)	791076	ENSMUST00000103249.1	-13491	ENSMUSG00000076448	Mir763	microRNA 763
1673	chr10	120461901	120462000	100	0.000376653	Intron (ENSMUST00000072777.13/15364, intron 3 of 4)	791076	ENSMUST00000103249.1	-13791	ENSMUSG00000076448	Mir763	microRNA 763
1674	chr10	120469901	120470000	100	0.000736488	Intron (ENSMUST00000072777.13/15364, intron 2 of 4)	15364	ENSMUST00000159310.1	6292	ENSMUSG00000056758	Hmga2	high mobility group AT-hook 2
1675	chr10	120475901	120476100	200	0.000139442	5' UTR	15364	ENSMUST00000159310.1	192	ENSMUSG00000056758	Hmga2	high mobility group AT-hook 2
1676	chr10	121367401	121367500	100	0.000376653	Intron (ENSMUST00000040344.6/75612, intron 1 of 13)	75612	ENSMUST00000219851.1	2225	ENSMUSG00000034707	Gns	glucosamine (N-acetyl)-6-sulfatase
1677	chr10	121395801	121395900	100	9.07675e-05	3' UTR	75612	ENSMUST00000219216.1	12686	ENSMUSG00000034707	Gns	glucosamine (N-acetyl)-6-sulfatase
1678	chr10	121396501	121396600	100	0.000736488	3' UTR	75612	ENSMUST00000219216.1	13386	ENSMUSG00000034707	Gns	glucosamine (N-acetyl)-6-sulfatase
1679	chr10	121396801	121396900	100	0.000376653	3' UTR	75612	ENSMUST00000219216.1	13686	ENSMUSG00000034707	Gns	glucosamine (N-acetyl)-6-sulfatase
1680	chr10	121546601	121546700	100	3.99162e-06	3' UTR	56480	ENSMUST00000219439.1	5749	ENSMUSG00000020115	Tbk1	TANK-binding kinase 1
1681	chr10	121555101	121555200	100	0.000376653	Intron (ENSMUST00000020316.3/56480, intron 13 of 20)	56480	ENSMUST00000220386.1	-938	ENSMUSG00000020115	Tbk1	TANK-binding kinase 1
1682	chr10	121566001	121566100	100	9.07675e-05	Intron (ENSMUST00000020316.3/56480, intron 7 of 20)	56480	ENSMUST00000218460.1	-1903	ENSMUSG00000020115	Tbk1	TANK-binding kinase 1
1683	chr10	121607001	121607100	100	0.000188117	Exon (ENSMUST00000039810.7/73192, exon 13 of 25)	73192	ENSMUST00000218973.1	-2403	ENSMUSG00000034667	Xpot	exportin, tRNA (nuclear export receptor for tRNAs)
1684	chr10	123008101	123008200	100	0.000736488	Exon (ENSMUST00000073792.10/67074, exon 31 of 36)	67074	ENSMUST00000218735.1	5231	ENSMUSG00000034602	Mon2	MON2 homolog, regulator of endosome to Golgi trafficking
1685	chr10	123125401	123125500	100	0.000736488	Exon (ENSMUST00000220377.1/14479, exon 16 of 22)	14479	ENSMUST00000219937.1	2385	ENSMUSG00000020124	Usp15	ubiquitin specific peptidase 15
1686	chr10	126996701	126996800	100	0.000736488	3' UTR	52468	ENSMUST00000105255.2	1088	ENSMUSG00000078429	Ctdsp2	CTD (carboxy-terminal domain, RNA polymerase II, polypeptide A) small phosphatase 2
1687	chr10	126996901	126997000	100	0.000376653	3' UTR	52468	ENSMUST00000105255.2	1288	ENSMUSG00000078429	Ctdsp2	CTD (carboxy-terminal domain, RNA polymerase II, polypeptide A) small phosphatase 2
1688	chr10	126997201	126997300	100	0.000188117	3' UTR	723882	ENSMUST00000102105.1	-1140	ENSMUSG00000072837	Mir546	microRNA 546
1689	chr10	126998801	126998900	100	0.000736488	3' UTR	723882	ENSMUST00000102105.1	361	ENSMUSG00000072837	Mir546	microRNA 546
1690	chr10	127056101	127056200	100	0.000736488	3' UTR	216438	ENSMUST00000040307.5	3984	ENSMUSG00000040502	Marchf9	membrane associated ring-CH-type finger 9
1691	chr10	127064201	127064300	100	0.000376653	Promoter	12567	ENSMUST00000123456.1	0	ENSMUSG00000006728	Cdk4	cyclin-dependent kinase 4
1692	chr10	127064601	127064700	100	1.38616e-07	Exon (ENSMUST00000006911.11/12567, exon 3 of 8)	12567	ENSMUST00000123456.1	303	ENSMUSG00000006728	Cdk4	cyclin-dependent kinase 4
1693	chr10	127065301	127065400	100	8.97631e-06	Exon (ENSMUST00000140254.7/12567, exon 5 of 7)	12567	ENSMUST00000145670.1	-676	ENSMUSG00000006728	Cdk4	cyclin-dependent kinase 4
1694	chr10	127067501	127067600	100	8.97631e-06	3' UTR	12567	ENSMUST00000145670.1	1425	ENSMUSG00000006728	Cdk4	cyclin-dependent kinase 4
1695	chr10	127069001	127069100	100	1.98676e-05	Intron (ENSMUST00000060991.5/67125, intron 2 of 5)	67125	ENSMUST00000218488.1	300	ENSMUSG00000006736	Tspan31	tetraspanin 31
1696	chr10	127095601	127095700	100	1.98676e-05	3' UTR	216439	ENSMUST00000217941.1	16694	ENSMUSG00000025422	Agap2	ArfGAP with GTPase domain, ankyrin repeat and PH domain 2
1697	chr10	127095901	127096000	100	0.000376653	3' UTR	216439	ENSMUST00000217941.1	16994	ENSMUSG00000025422	Agap2	ArfGAP with GTPase domain, ankyrin repeat and PH domain 2
1698	chr10	127096101	127096200	100	1.98676e-05	3' UTR	216439	ENSMUST00000217941.1	17194	ENSMUSG00000025422	Agap2	ArfGAP with GTPase domain, ankyrin repeat and PH domain 2
1699	chr10	127098301	127098400	100	0.000736488	3' UTR	216439	ENSMUST00000217941.1	19394	ENSMUSG00000025422	Agap2	ArfGAP with GTPase domain, ankyrin repeat and PH domain 2
1700	chr10	127116201	127116300	100	0.000736488	Intron (ENSMUST00000080975.5/216440, intron 5 of 13)	216440	ENSMUST00000218798.1	4815	ENSMUSG00000040462	Os9	amplified in osteosarcoma
1701	chr10	127191201	127191400	200	0.000368407	Exon (ENSMUST00000038217.13/80904, exon 5 of 6)	52666	ENSMUST00000219245.1	-1118	ENSMUSG00000019467	Arhgef25	Rho guanine nucleotide exchange factor (GEF) 25
1702	chr10	127192601	127192700	100	8.97631e-06	Exon (ENSMUST00000038217.13/80904, exon 4 of 6)	80904	ENSMUST00000137151.7	1766	ENSMUSG00000040415	Dtx3	deltex 3, E3 ubiquitin ligase
1703	chr10	127193101	127193200	100	1.38616e-07	Exon (ENSMUST00000038217.13/80904, exon 4 of 6)	80904	ENSMUST00000137151.7	1266	ENSMUSG00000040415	Dtx3	deltex 3, E3 ubiquitin ligase
1704	chr10	127197601	127197700	100	0.000736488	3' UTR	80904	ENSMUST00000144322.7	-1873	ENSMUSG00000040415	Dtx3	deltex 3, E3 ubiquitin ligase
1705	chr10	127285101	127285200	100	0.000736488	Exon (ENSMUST00000126243.8/110962, exon 2 of 8)	110962	ENSMUST00000126243.8	700	ENSMUSG00000025409	Mbd6	methyl-CpG binding domain protein 6
1706	chr10	127285601	127285700	100	0.000188117	Exon (ENSMUST00000126243.8/110962, exon 1 of 8)	110962	ENSMUST00000126243.8	200	ENSMUSG00000025409	Mbd6	methyl-CpG binding domain protein 6
1707	chr10	127286401	127286500	100	0.000736488	Exon (ENSMUST00000026476.12/110962, exon 6 of 13)	110962	ENSMUST00000126243.8	-501	ENSMUSG00000025409	Mbd6	methyl-CpG binding domain protein 6
1708	chr10	127465901	127466000	100	0.000736488	Intron (ENSMUST00000166820.7/71750, intron 14 of 26)	71750	ENSMUST00000171823.1	6366	ENSMUSG00000025404	R3hdm2	R3H domain containing 2
1709	chr10	127471701	127471800	100	0.000376653	3' UTR	71750	ENSMUST00000164469.1	-9514	ENSMUSG00000025404	R3hdm2	R3H domain containing 2
1710	chr10	127660301	127660400	100	0.000736488	3' UTR	20852	ENSMUST00000145470.1	901	ENSMUSG00000002147	Stat6	signal transducer and activator of transcription 6
1711	chr10	128046701	128046800	100	0.000736488	Exon (ENSMUST00000073868.8/17938, exon 4 of 8)	17938	ENSMUST00000092048.12	11066	ENSMUSG00000061315	Naca	nascent polypeptide-associated complex alpha polypeptide
1712	chr10	128047701	128047800	100	1.98676e-05	Exon (ENSMUST00000073868.8/17938, exon 5 of 8)	56351	ENSMUST00000052798.13	-11154	ENSMUSG00000071072	Ptges3	prostaglandin E synthase 3
1713	chr10	128048001	128048100	100	1.73096e-14	Exon (ENSMUST00000073868.8/17938, exon 6 of 8)	56351	ENSMUST00000052798.13	-10854	ENSMUSG00000071072	Ptges3	prostaglandin E synthase 3
1714	chr10	128085401	128085500	100	4.29435e-05	Exon (ENSMUST00000026459.5/11947, exon 5 of 10)	751518	ENSMUST00000175504.1	112	ENSMUSG00000104755	Mir677	microRNA 677
1715	chr10	128086001	128086200	200	8.89654e-07	Exon (ENSMUST00000026459.5/11947, exon 6 of 10)	11947	ENSMUST00000124993.1	-30	ENSMUSG00000025393	Atp5b	ATP synthase, H+ transporting mitochondrial F1 complex, beta subunit
1716	chr10	128088301	128088400	100	2.92063e-10	Exon (ENSMUST00000026459.5/11947, exon 8 of 10)	11947	ENSMUST00000123803.1	-91	ENSMUSG00000025393	Atp5b	ATP synthase, H+ transporting mitochondrial F1 complex, beta subunit
1717	chr10	128088901	128089000	100	0.000376653	Exon (ENSMUST00000026459.5/11947, exon 9 of 10)	11947	ENSMUST00000125992.1	-41	ENSMUSG00000025393	Atp5b	ATP synthase, H+ transporting mitochondrial F1 complex, beta subunit
1718	chr10	128090001	128090100	100	1.2596e-12	Exon (ENSMUST00000026459.5/11947, exon 10 of 10)	11947	ENSMUST00000125992.1	960	ENSMUSG00000025393	Atp5b	ATP synthase, H+ transporting mitochondrial F1 complex, beta subunit
1719	chr10	128110801	128110900	100	0.000188117	Exon (ENSMUST00000218772.1/116848, exon 5 of 11)	116848	ENSMUST00000219980.1	14421	ENSMUSG00000040054	Baz2a	bromodomain adjacent to zinc finger domain, 2A
1720	chr10	128115201	128115300	100	0.000736488	Exon (ENSMUST00000218772.1/116848, exon 9 of 11)	116848	ENSMUST00000219980.1	18821	ENSMUSG00000040054	Baz2a	bromodomain adjacent to zinc finger domain, 2A
1721	chr10	128127801	128127900	100	0.000736488	3' UTR	56516	ENSMUST00000217722.1	6335	ENSMUSG00000040043	Rbms2	RNA binding motif, single stranded interacting protein 2
1722	chr10	128129601	128129700	100	0.000736488	Downstream (<=300bp)	56516	ENSMUST00000217722.1	4535	ENSMUSG00000040043	Rbms2	RNA binding motif, single stranded interacting protein 2
1723	chr10	128283101	128283200	100	0.000736488	Exon (ENSMUST00000085708.2/20847, exon 14 of 24)	20847	ENSMUST00000217727.1	284	ENSMUSG00000040033	Stat2	signal transducer and activator of transcription 2
1724	chr10	128359901	128360000	100	9.07675e-05	Exon (ENSMUST00000005826.8/12974, exon 10 of 11)	210582	ENSMUST00000219934.1	5404	ENSMUSG00000039914	Coq10a	coenzyme Q10A
1725	chr10	128361101	128361200	100	0.000736488	3' UTR	210582	ENSMUST00000219934.1	4204	ENSMUSG00000039914	Coq10a	coenzyme Q10A
1726	chr10	128361401	128361500	100	0.000188117	3' UTR	210582	ENSMUST00000219934.1	3904	ENSMUSG00000039914	Coq10a	coenzyme Q10A
1727	chr10	128484301	128484400	100	9.07675e-05	Exon (ENSMUST00000026433.8/68094, exon 24 of 28)	17904	ENSMUST00000219655.1	8631	ENSMUSG00000090841	Myl6	myosin, light polypeptide 6, alkali, smooth muscle and non-muscle
1728	chr10	128487301	128487500	200	0.000736488	Exon (ENSMUST00000026433.8/68094, exon 26 of 28)	17904	ENSMUST00000219655.1	5531	ENSMUSG00000090841	Myl6	myosin, light polypeptide 6, alkali, smooth muscle and non-muscle
1729	chr10	128489601	128489800	200	0.000462303	3' UTR	17904	ENSMUST00000219655.1	3231	ENSMUSG00000090841	Myl6	myosin, light polypeptide 6, alkali, smooth muscle and non-muscle
1730	chr10	128490801	128490900	100	1.98676e-05	3' UTR	17904	ENSMUST00000219655.1	2131	ENSMUSG00000090841	Myl6	myosin, light polypeptide 6, alkali, smooth muscle and non-muscle
1731	chr10	128491401	128491500	100	0.000736488	3' UTR	17904	ENSMUST00000219655.1	1531	ENSMUSG00000090841	Myl6	myosin, light polypeptide 6, alkali, smooth muscle and non-muscle
1732	chr10	128492001	128492100	100	0.000736488	3' UTR	17904	ENSMUST00000219655.1	931	ENSMUSG00000090841	Myl6	myosin, light polypeptide 6, alkali, smooth muscle and non-muscle
1733	chr10	128492301	128492400	100	0.000188117	3' UTR	17904	ENSMUST00000219655.1	631	ENSMUSG00000090841	Myl6	myosin, light polypeptide 6, alkali, smooth muscle and non-muscle
1734	chr10	128548101	128548300	200	5.23872e-15	3' UTR	103284	ENSMUST00000040572.9	-327	ENSMUSG00000039810	Zc3h10	zinc finger CCCH type containing 10
1735	chr10	128624501	128624700	200	2.14718e-05	3' UTR	27370	ENSMUST00000219591.1	1724	ENSMUSG00000025362	Rps26	ribosomal protein S26
1736	chr10	128677601	128677800	200	0.000462303	3' UTR	211389	ENSMUST00000054764.8	-3528	ENSMUSG00000049858	Suox	sulfite oxidase
1737	chr10	128678601	128678700	100	0.000376653	3' UTR	211389	ENSMUST00000054764.8	-4528	ENSMUSG00000049858	Suox	sulfite oxidase
1738	chr10	128679301	128679400	100	0.000736488	3' UTR	211389	ENSMUST00000054764.8	-5228	ENSMUSG00000049858	Suox	sulfite oxidase
1739	chr10	128765201	128765300	100	0.000736488	Exon (ENSMUST00000163377.9/78428, exon 2 of 3)	78428	ENSMUST00000218218.1	16673	ENSMUSG00000064030	Pym1	PYM homolog 1, exon junction complex associated factor
1740	chr10	128806201	128806300	100	0.000376653	5' UTR	74330	ENSMUST00000218511.1	321	ENSMUSG00000025354	Dnajc14	DnaJ heat shock protein family (Hsp40) member C14
1741	chr10	128807101	128807200	100	0.000376653	Exon (ENSMUST00000217745.1/74330, exon 2 of 7)	74330	ENSMUST00000218765.1	-178	ENSMUSG00000025354	Dnajc14	DnaJ heat shock protein family (Hsp40) member C14
1742	chr10	128912001	128912100	100	1.75465e-06	Exon (ENSMUST00000219317.1/12512, exon 6 of 9)	12512	ENSMUST00000218450.1	1379	ENSMUSG00000025351	Cd63	CD63 antigen
1743	chr10	129970101	129970200	100	0.000376653	Distal Intergenic	100043200	ENSMUST00000167974.1	-3403	ENSMUSG00000094295	Olfr819	olfactory receptor 819
1744	chr10	130413501	130413600	100	0.000736488	Distal Intergenic	623734	ENSMUST00000171811.3	16103	ENSMUSG00000092048	Vmn2r85	vomeronasal 2, receptor 85
1745	chr10	130413701	130413900	200	0.000736488	Distal Intergenic	623734	ENSMUST00000171811.3	15803	ENSMUSG00000092048	Vmn2r85	vomeronasal 2, receptor 85
1746	chr11	3126901	3127200	300	6.41449e-05	Exon (ENSMUST00000132408.7/236604, exon 2 of 4)	236604	ENSMUST00000119128.7	895	NA	Pisd-ps1	phosphatidylserine decarboxylase, pseudogene 1
1747	chr11	3127301	3127400	100	8.97631e-06	Intron (ENSMUST00000145164.7/236604, intron 1 of 2)	236604	ENSMUST00000119128.7	1295	NA	Pisd-ps1	phosphatidylserine decarboxylase, pseudogene 1
1748	chr11	3127801	3128600	800	1.1401e-06	Intron (ENSMUST00000145164.7/236604, intron 2 of 2)	236604	ENSMUST00000152828.1	-372	NA	Pisd-ps1	phosphatidylserine decarboxylase, pseudogene 1
1749	chr11	3129901	3130100	200	2.14769e-05	Exon (ENSMUST00000119128.7/236604, exon 5 of 7)	236604	ENSMUST00000152828.1	929	NA	Pisd-ps1	phosphatidylserine decarboxylase, pseudogene 1
1750	chr11	3131901	3132000	100	1.98676e-05	3' UTR	236604	ENSMUST00000152828.1	2929	NA	Pisd-ps1	phosphatidylserine decarboxylase, pseudogene 1
1751	chr11	3132201	3132400	200	9.44387e-05	3' UTR	236604	ENSMUST00000152828.1	3229	NA	Pisd-ps1	phosphatidylserine decarboxylase, pseudogene 1
1752	chr11	3133501	3133700	200	0.000378178	Exon (ENSMUST00000144447.7/78887, exon 3 of 4)	78887	ENSMUST00000144447.7	2307	ENSMUSG00000023764	Sfi1	Sfi1 homolog, spindle assembly associated (yeast)
1753	chr11	3137201	3137400	200	0.000282385	Intron (ENSMUST00000101655.9/78887, intron 21 of 31)	78887	ENSMUST00000144447.7	-1194	ENSMUSG00000023764	Sfi1	Sfi1 homolog, spindle assembly associated (yeast)
1754	chr11	3150001	3150100	100	3.99162e-06	Exon (ENSMUST00000120853.1/ENSMUST00000120853.1, exon 1 of 1)	78887	ENSMUST00000146888.1	-3279	ENSMUSG00000023764	Sfi1	Sfi1 homolog, spindle assembly associated (yeast)
1755	chr11	3162901	3163000	100	0.000736488	Intron (ENSMUST00000101655.9/78887, intron 8 of 31)	78887	ENSMUST00000126746.8	1597	ENSMUSG00000023764	Sfi1	Sfi1 homolog, spindle assembly associated (yeast)
1756	chr11	3184601	3184700	100	0.000736488	Intron (ENSMUST00000101655.9/78887, intron 3 of 31)	78887	ENSMUST00000155763.7	2655	ENSMUSG00000023764	Sfi1	Sfi1 homolog, spindle assembly associated (yeast)
1757	chr11	3192701	3192800	100	0.000188117	Intron (ENSMUST00000081318.12/78887, intron 1 of 32)	78887	ENSMUST00000081318.12	607	ENSMUSG00000023764	Sfi1	Sfi1 homolog, spindle assembly associated (yeast)
1758	chr11	3193201	3193300	100	0.000188117	Intron (ENSMUST00000081318.12/78887, intron 1 of 32)	78887	ENSMUST00000081318.12	107	ENSMUSG00000023764	Sfi1	Sfi1 homolog, spindle assembly associated (yeast)
1759	chr11	3195601	3195700	100	0.000188117	Intron (ENSMUST00000159304.7/78887, intron 2 of 3)	78887	ENSMUST00000146218.1	-1338	ENSMUSG00000023764	Sfi1	Sfi1 homolog, spindle assembly associated (yeast)
1760	chr11	3290601	3290700	100	0.000376653	5' UTR	56218	ENSMUST00000093402.11	144	ENSMUSG00000020453	Patz1	POZ (BTB) and AT hook containing zinc finger 1
1761	chr11	3302101	3302200	100	9.07675e-05	Intron (ENSMUST00000101644.9/56218, intron 3 of 3)	56218	ENSMUST00000154319.1	3817	ENSMUSG00000020453	Patz1	POZ (BTB) and AT hook containing zinc finger 1
1762	chr11	3345501	3345600	100	0.000188117	3' UTR	16886	ENSMUST00000148771.1	7217	ENSMUSG00000020451	Limk2	LIM motif-containing protein kinase 2
1763	chr11	3517501	3517700	200	0.000368257	3' UTR	114679	ENSMUST00000094469.4	2634	ENSMUSG00000075702	Selenom	selenoprotein M
1764	chr11	3517901	3518000	100	0.000188117	Intron (ENSMUST00000020718.9/29856, intron 8 of 8)	114679	ENSMUST00000094469.4	3034	ENSMUSG00000075702	Selenom	selenoprotein M
1765	chr11	3518101	3518200	100	0.000376653	Intron (ENSMUST00000020718.9/29856, intron 8 of 8)	114679	ENSMUST00000094469.4	3234	ENSMUSG00000075702	Selenom	selenoprotein M
1766	chr11	3518501	3519000	500	0.000308343	Intron (ENSMUST00000020718.9/29856, intron 8 of 8)	29856	ENSMUST00000144635.1	3554	ENSMUSG00000020439	Smtn	smoothelin
1767	chr11	3519201	3519400	200	0.000389716	Intron (ENSMUST00000020718.9/29856, intron 8 of 8)	29856	ENSMUST00000144635.1	3154	ENSMUSG00000020439	Smtn	smoothelin
1768	chr11	3519801	3519900	100	3.99162e-06	Intron (ENSMUST00000020718.9/29856, intron 8 of 8)	29856	ENSMUST00000144635.1	2654	ENSMUSG00000020439	Smtn	smoothelin
1769	chr11	3520101	3520200	100	1.98676e-05	Intron (ENSMUST00000020718.9/29856, intron 8 of 8)	29856	ENSMUST00000144635.1	2354	ENSMUSG00000020439	Smtn	smoothelin
1770	chr11	3520301	3520500	200	0.000378178	Intron (ENSMUST00000020718.9/29856, intron 8 of 8)	29856	ENSMUST00000144635.1	2054	ENSMUSG00000020439	Smtn	smoothelin
1771	chr11	3521501	3521600	100	9.07675e-05	Intron (ENSMUST00000020718.9/29856, intron 7 of 8)	29856	ENSMUST00000144635.1	954	ENSMUSG00000020439	Smtn	smoothelin
1772	chr11	3525601	3525700	100	0.000188117	Intron (ENSMUST00000020718.9/29856, intron 3 of 8)	29856	ENSMUST00000020718.9	2237	ENSMUSG00000020439	Smtn	smoothelin
1773	chr11	3526001	3526100	100	9.07675e-05	Intron (ENSMUST00000020718.9/29856, intron 3 of 8)	29856	ENSMUST00000020718.9	1837	ENSMUSG00000020439	Smtn	smoothelin
1774	chr11	3531201	3531300	100	3.99162e-06	Exon (ENSMUST00000123459.1/ENSMUST00000123459.1, exon 1 of 4)	29856	ENSMUST00000020718.9	-3264	ENSMUSG00000020439	Smtn	smoothelin
1775	chr11	3642801	3642900	100	0.000376653	Exon (ENSMUST00000132077.3/544752, exon 2 of 2)	544752	ENSMUST00000227137.1	4232	ENSMUSG00000056579	Tug1	taurine upregulated gene 1
1776	chr11	3644801	3644900	100	1.98676e-05	Exon (ENSMUST00000132077.3/544752, exon 2 of 2)	544752	ENSMUST00000227137.1	2232	ENSMUSG00000056579	Tug1	taurine upregulated gene 1
1777	chr11	3645101	3645200	100	0.000736488	Exon (ENSMUST00000132077.3/544752, exon 2 of 2)	544752	ENSMUST00000227137.1	1932	ENSMUSG00000056579	Tug1	taurine upregulated gene 1
1778	chr11	3646501	3646600	100	0.000376653	Exon (ENSMUST00000132077.3/544752, exon 1 of 2)	544752	ENSMUST00000227137.1	532	ENSMUSG00000056579	Tug1	taurine upregulated gene 1
1779	chr11	3646801	3646900	100	0.000736488	Exon (ENSMUST00000132077.3/544752, exon 1 of 2)	544752	ENSMUST00000227137.1	232	ENSMUSG00000056579	Tug1	taurine upregulated gene 1
1780	chr11	3649801	3649900	100	0.000188117	5' UTR	74522	ENSMUST00000140242.7	42	ENSMUSG00000034543	Morc2a	microrchidia 2A
1781	chr11	3900401	3900500	100	0.000736488	3' UTR	75219	ENSMUST00000055931.4	5161	ENSMUSG00000047205	Dusp18	dual specificity phosphatase 18
1782	chr11	4186801	4186900	100	3.26219e-07	Promoter	103724	ENSMUST00000180088.1	0	ENSMUSG00000034412	Tbc1d10a	TBC1 domain family, member 10a
1783	chr11	4510601	4510700	100	0.000188117	Intron (ENSMUST00000109943.9/74302, intron 6 of 17)	74302	ENSMUST00000144242.1	-17283	ENSMUSG00000034354	Mtmr3	myotubularin related protein 3
1784	chr11	4531901	4532000	100	4.29435e-05	Intron (ENSMUST00000109943.9/74302, intron 1 of 17)	74302	ENSMUST00000128256.1	-3495	ENSMUSG00000034354	Mtmr3	myotubularin related protein 3
1785	chr11	4546601	4546700	100	0.000736488	Intron (ENSMUST00000109943.9/74302, intron 1 of 17)	74302	ENSMUST00000040448.12	-333	ENSMUSG00000034354	Mtmr3	myotubularin related protein 3
1786	chr11	4549601	4549700	100	0.000736488	Intron (ENSMUST00000109943.9/74302, intron 1 of 17)	74302	ENSMUST00000040448.12	-3333	ENSMUSG00000034354	Mtmr3	myotubularin related protein 3
1787	chr11	4569801	4570000	200	0.000736488	Intron (ENSMUST00000109943.9/74302, intron 1 of 17)	74302	ENSMUST00000040448.12	-23533	ENSMUSG00000034354	Mtmr3	myotubularin related protein 3
1788	chr11	4576401	4576500	100	1.98676e-05	Intron (ENSMUST00000109943.9/74302, intron 1 of 17)	74302	ENSMUST00000109943.9	18315	ENSMUSG00000034354	Mtmr3	myotubularin related protein 3
1789	chr11	4701901	4702000	100	3.99162e-06	3' UTR	66152	ENSMUST00000130236.1	2053	ENSMUSG00000059534	Uqcr10	ubiquinol-cytochrome c reductase, complex III subunit X
1790	chr11	4765901	4766300	400	9.41979e-05	3' UTR	18016	ENSMUST00000141342.2	18807	ENSMUSG00000009073	Nf2	neurofibromin 2
1791	chr11	4766801	4767800	1000	0.000125531	3' UTR	18016	ENSMUST00000141342.2	17307	ENSMUSG00000009073	Nf2	neurofibromin 2
1792	chr11	4768001	4768100	100	0.000736488	3' UTR	18016	ENSMUST00000141342.2	17007	ENSMUSG00000009073	Nf2	neurofibromin 2
1793	chr11	4768501	4768700	200	0.000413628	Intron (ENSMUST00000109910.8/18016, intron 15 of 15)	18016	ENSMUST00000141342.2	16407	ENSMUSG00000009073	Nf2	neurofibromin 2
1794	chr11	4768901	4769100	200	5.53176e-05	Intron (ENSMUST00000109910.8/18016, intron 15 of 15)	18016	ENSMUST00000141342.2	16007	ENSMUSG00000009073	Nf2	neurofibromin 2
1795	chr11	4769301	4769500	200	0.00023371	Intron (ENSMUST00000109910.8/18016, intron 15 of 15)	18016	ENSMUST00000141342.2	15607	ENSMUSG00000009073	Nf2	neurofibromin 2
1796	chr11	4770101	4770200	100	0.000736488	Intron (ENSMUST00000109910.8/18016, intron 15 of 15)	18016	ENSMUST00000141342.2	14907	ENSMUSG00000009073	Nf2	neurofibromin 2
1797	chr11	4770501	4770600	100	1.98676e-05	Intron (ENSMUST00000109910.8/18016, intron 15 of 15)	18016	ENSMUST00000141342.2	14507	ENSMUSG00000009073	Nf2	neurofibromin 2
1798	chr11	4770801	4770900	100	0.000736488	Intron (ENSMUST00000109910.8/18016, intron 15 of 15)	18016	ENSMUST00000141342.2	14207	ENSMUSG00000009073	Nf2	neurofibromin 2
1799	chr11	4771601	4771700	100	0.000376653	Intron (ENSMUST00000109910.8/18016, intron 15 of 15)	18016	ENSMUST00000141342.2	13407	ENSMUSG00000009073	Nf2	neurofibromin 2
1800	chr11	4771901	4772000	100	4.29435e-05	Intron (ENSMUST00000109910.8/18016, intron 15 of 15)	18016	ENSMUST00000141342.2	13107	ENSMUSG00000009073	Nf2	neurofibromin 2
1801	chr11	4772801	4772900	100	0.000736488	Intron (ENSMUST00000109910.8/18016, intron 15 of 15)	18016	ENSMUST00000141342.2	12207	ENSMUSG00000009073	Nf2	neurofibromin 2
1802	chr11	4773301	4773400	100	0.000188117	Intron (ENSMUST00000109910.8/18016, intron 15 of 15)	18016	ENSMUST00000141342.2	11707	ENSMUSG00000009073	Nf2	neurofibromin 2
1803	chr11	4774001	4774100	100	0.000188117	Intron (ENSMUST00000109910.8/18016, intron 15 of 15)	18016	ENSMUST00000141342.2	11007	ENSMUSG00000009073	Nf2	neurofibromin 2
1804	chr11	4774401	4774500	100	8.97631e-06	Intron (ENSMUST00000109910.8/18016, intron 15 of 15)	18016	ENSMUST00000141342.2	10607	ENSMUSG00000009073	Nf2	neurofibromin 2
1805	chr11	4775001	4775100	100	0.000736488	Intron (ENSMUST00000109910.8/18016, intron 15 of 15)	18016	ENSMUST00000141342.2	10007	ENSMUSG00000009073	Nf2	neurofibromin 2
1806	chr11	4775601	4775700	100	0.000376653	Intron (ENSMUST00000109910.8/18016, intron 15 of 15)	18016	ENSMUST00000141342.2	9407	ENSMUSG00000009073	Nf2	neurofibromin 2
1807	chr11	4775901	4776000	100	0.000736488	Intron (ENSMUST00000109910.8/18016, intron 15 of 15)	18016	ENSMUST00000141342.2	9107	ENSMUSG00000009073	Nf2	neurofibromin 2
1808	chr11	4776501	4776600	100	0.000188117	Intron (ENSMUST00000109910.8/18016, intron 15 of 15)	18016	ENSMUST00000141342.2	8507	ENSMUSG00000009073	Nf2	neurofibromin 2
1809	chr11	4776701	4776800	100	0.000736488	Intron (ENSMUST00000109910.8/18016, intron 15 of 15)	18016	ENSMUST00000141342.2	8307	ENSMUSG00000009073	Nf2	neurofibromin 2
1810	chr11	4777301	4777500	200	2.23491e-05	Intron (ENSMUST00000109910.8/18016, intron 15 of 15)	18016	ENSMUST00000141342.2	7607	ENSMUSG00000009073	Nf2	neurofibromin 2
1811	chr11	4778601	4778700	100	0.000736488	Intron (ENSMUST00000109910.8/18016, intron 15 of 15)	18016	ENSMUST00000141342.2	6407	ENSMUSG00000009073	Nf2	neurofibromin 2
1812	chr11	4785201	4785300	100	0.000188117	Intron (ENSMUST00000109910.8/18016, intron 13 of 15)	18016	ENSMUST00000141342.2	-94	ENSMUSG00000009073	Nf2	neurofibromin 2
1813	chr11	4785701	4785800	100	1.98676e-05	Intron (ENSMUST00000109910.8/18016, intron 13 of 15)	18016	ENSMUST00000141342.2	-594	ENSMUSG00000009073	Nf2	neurofibromin 2
1814	chr11	4786601	4786700	100	3.99162e-06	Intron (ENSMUST00000109910.8/18016, intron 13 of 15)	18016	ENSMUST00000141342.2	-1494	ENSMUSG00000009073	Nf2	neurofibromin 2
1815	chr11	4786901	4787000	100	8.97631e-06	Intron (ENSMUST00000109910.8/18016, intron 13 of 15)	18016	ENSMUST00000141342.2	-1794	ENSMUSG00000009073	Nf2	neurofibromin 2
1816	chr11	4787201	4787400	200	0.000462303	Intron (ENSMUST00000109910.8/18016, intron 13 of 15)	18016	ENSMUST00000141342.2	-2094	ENSMUSG00000009073	Nf2	neurofibromin 2
1817	chr11	4788801	4788900	100	0.000736488	Intron (ENSMUST00000109910.8/18016, intron 12 of 15)	18016	ENSMUST00000141342.2	-3694	ENSMUSG00000009073	Nf2	neurofibromin 2
1818	chr11	4789101	4789200	100	0.000736488	Intron (ENSMUST00000109910.8/18016, intron 12 of 15)	18016	ENSMUST00000141342.2	-3994	ENSMUSG00000009073	Nf2	neurofibromin 2
1819	chr11	4789701	4789800	100	4.29435e-05	Exon (ENSMUST00000109910.8/18016, exon 12 of 16)	18016	ENSMUST00000141342.2	-4594	ENSMUSG00000009073	Nf2	neurofibromin 2
1820	chr11	4797001	4797100	100	9.07675e-05	Intron (ENSMUST00000109910.8/18016, intron 8 of 15)	18016	ENSMUST00000141342.2	-11894	ENSMUSG00000009073	Nf2	neurofibromin 2
1821	chr11	4798601	4798700	100	0.000376653	Intron (ENSMUST00000109910.8/18016, intron 8 of 15)	18016	ENSMUST00000141342.2	-13494	ENSMUSG00000009073	Nf2	neurofibromin 2
1822	chr11	4818201	4818300	100	0.000736488	Intron (ENSMUST00000109910.8/18016, intron 3 of 15)	18016	ENSMUST00000137926.8	247	ENSMUSG00000009073	Nf2	neurofibromin 2
1823	chr11	4819701	4819800	100	0.000188117	Intron (ENSMUST00000109910.8/18016, intron 2 of 15)	18016	ENSMUST00000093374.10	596	ENSMUSG00000009073	Nf2	neurofibromin 2
1824	chr11	4829501	4829600	100	0.000376653	Intron (ENSMUST00000109910.8/18016, intron 1 of 15)	18016	ENSMUST00000109908.7	3533	ENSMUSG00000009073	Nf2	neurofibromin 2
1825	chr11	4834001	4834100	100	0.000376653	Intron (ENSMUST00000109910.8/18016, intron 1 of 15)	18016	ENSMUST00000109908.7	-868	ENSMUSG00000009073	Nf2	neurofibromin 2
1826	chr11	4843001	4843100	100	0.000188117	Intron (ENSMUST00000109910.8/18016, intron 1 of 15)	18016	ENSMUST00000056290.12	5885	ENSMUSG00000009073	Nf2	neurofibromin 2
1827	chr11	4844101	4844200	100	0.000736488	Intron (ENSMUST00000109910.8/18016, intron 1 of 15)	18016	ENSMUST00000056290.12	4785	ENSMUSG00000009073	Nf2	neurofibromin 2
1828	chr11	4849001	4849300	300	6.05131e-05	Promoter	18016	ENSMUST00000164190.7	0	ENSMUSG00000009073	Nf2	neurofibromin 2
1829	chr11	4878601	4878700	100	0.000736488	Intron (ENSMUST00000038570.8/18082, intron 1 of 9)	18082	ENSMUST00000139737.1	-4494	ENSMUSG00000034285	Nipsnap1	nipsnap homolog 1
1830	chr11	5032401	5032500	100	0.000736488	Exon (ENSMUST00000109897.7/11764, exon 14 of 21)	11764	ENSMUST00000145704.1	1424	ENSMUSG00000009090	Ap1b1	adaptor protein complex AP-1, beta 1 subunit
1831	chr11	5061101	5061200	100	0.000736488	Exon (ENSMUST00000056649.12/78926, exon 7 of 7)	75668	ENSMUST00000126974.1	2135	ENSMUSG00000034209	Rasl10a	RAS-like, family 10, member A
1832	chr11	5061501	5061600	100	0.000188117	Exon (ENSMUST00000056649.12/78926, exon 7 of 7)	75668	ENSMUST00000126974.1	2535	ENSMUSG00000034209	Rasl10a	RAS-like, family 10, member A
1833	chr11	5063801	5063900	100	9.07675e-05	Exon (ENSMUST00000122886.7/78926, exon 2 of 5)	78926	ENSMUST00000156196.1	951	ENSMUSG00000034201	Gas2l1	growth arrest-specific 2 like 1
1834	chr11	5064801	5064900	100	0.000376653	Promoter	78926	ENSMUST00000156196.1	0	ENSMUSG00000034201	Gas2l1	growth arrest-specific 2 like 1
1835	chr11	5070201	5070300	100	0.000736488	Exon (ENSMUST00000079949.12/14030, exon 16 of 17)	14030	ENSMUST00000130118.1	591	ENSMUSG00000009079	Ewsr1	Ewing sarcoma breakpoint region 1
1836	chr11	5070601	5070700	100	0.000188117	Exon (ENSMUST00000079949.12/14030, exon 15 of 17)	14030	ENSMUST00000130118.1	191	ENSMUSG00000009079	Ewsr1	Ewing sarcoma breakpoint region 1
1837	chr11	5079001	5079200	200	1.75465e-06	Exon (ENSMUST00000141002.7/14030, exon 1 of 5)	14030	ENSMUST00000141002.7	328	ENSMUSG00000009079	Ewsr1	Ewing sarcoma breakpoint region 1
1838	chr11	5079301	5079600	300	2.99552e-06	Promoter	14030	ENSMUST00000141002.7	0	ENSMUSG00000009079	Ewsr1	Ewing sarcoma breakpoint region 1
1839	chr11	5079701	5080400	700	9.88433e-05	Promoter	14030	ENSMUST00000139886.1	0	ENSMUSG00000009079	Ewsr1	Ewing sarcoma breakpoint region 1
1840	chr11	5080601	5080900	300	0.000128589	Exon (ENSMUST00000093365.11/14030, exon 9 of 9)	14030	ENSMUST00000139886.1	-702	ENSMUSG00000009079	Ewsr1	Ewing sarcoma breakpoint region 1
1841	chr11	5081501	5081800	300	2.9922e-06	Intron (ENSMUST00000079949.12/14030, intron 8 of 16)	14030	ENSMUST00000150168.7	540	ENSMUSG00000009079	Ewsr1	Ewing sarcoma breakpoint region 1
1842	chr11	5081901	5082100	200	0.000389716	Exon (ENSMUST00000144238.1/14030, exon 3 of 3)	14030	ENSMUST00000150168.7	240	ENSMUSG00000009079	Ewsr1	Ewing sarcoma breakpoint region 1
1843	chr11	5082301	5082600	300	0.00037767	Promoter	14030	ENSMUST00000150168.7	0	ENSMUSG00000009079	Ewsr1	Ewing sarcoma breakpoint region 1
1844	chr11	5082801	5083000	200	0.000736488	Intron (ENSMUST00000079949.12/14030, intron 7 of 16)	14030	ENSMUST00000150168.7	-461	ENSMUSG00000009079	Ewsr1	Ewing sarcoma breakpoint region 1
1845	chr11	5083301	5083400	100	4.24163e-09	Exon (ENSMUST00000079949.12/14030, exon 7 of 17)	14030	ENSMUST00000150168.7	-961	ENSMUSG00000009079	Ewsr1	Ewing sarcoma breakpoint region 1
1846	chr11	5084001	5084100	100	9.07675e-05	Intron (ENSMUST00000079949.12/14030, intron 6 of 16)	14030	ENSMUST00000150168.7	-1661	ENSMUSG00000009079	Ewsr1	Ewing sarcoma breakpoint region 1
1847	chr11	5087901	5088000	100	0.000188117	Exon (ENSMUST00000079949.12/14030, exon 5 of 17)	14030	ENSMUST00000144238.1	-1865	ENSMUSG00000009079	Ewsr1	Ewing sarcoma breakpoint region 1
1848	chr11	5090401	5090500	100	7.60547e-07	3' UTR	14030	ENSMUST00000144238.1	-4365	ENSMUSG00000009079	Ewsr1	Ewing sarcoma breakpoint region 1
1849	chr11	5098001	5098100	100	0.000188117	Intron (ENSMUST00000079949.12/14030, intron 1 of 16)	279766	ENSMUST00000101610.9	-826	ENSMUSG00000034175	Rhbdd3	rhomboid domain containing 3
1850	chr11	5520901	5521100	200	0.000462303	Promoter	22433	ENSMUST00000239150.1	0	ENSMUSG00000020484	Xbp1	X-box binding protein 1
1851	chr11	5523901	5524000	100	0.000736488	Exon (ENSMUST00000145588.1/22433, exon 3 of 3)	22433	ENSMUST00000149159.2	1978	ENSMUSG00000020484	Xbp1	X-box binding protein 1
1852	chr11	5524801	5525000	200	0.000372732	3' UTR	22433	ENSMUST00000149159.2	2878	ENSMUSG00000020484	Xbp1	X-box binding protein 1
1853	chr11	5554501	5554700	200	0.00023371	Distal Intergenic	104479	ENSMUST00000020776.4	-12314	ENSMUSG00000020482	Ccdc117	coiled-coil domain containing 117
1854	chr11	5555401	5555600	200	0.000188327	Distal Intergenic	104479	ENSMUST00000020776.4	-13214	ENSMUSG00000020482	Ccdc117	coiled-coil domain containing 117
1855	chr11	5740801	5740900	100	0.000376653	Intron (ENSMUST00000093362.11/72046, intron 1 of 5)	72046	ENSMUST00000140922.1	246	ENSMUSG00000049680	Urgcp	upregulator of cell proliferation
1856	chr11	5799901	5800000	100	0.000736488	3' UTR	56012	ENSMUST00000020768.3	3733	ENSMUSG00000020475	Pgam2	phosphoglycerate mutase 2
1857	chr11	5966701	5966800	100	0.000188117	3' UTR	56418	ENSMUST00000143834.1	7397	ENSMUSG00000002741	Ykt6	YKT6 v-SNARE homolog (S. cerevisiae)
1858	chr11	5967101	5967200	100	0.000376653	3' UTR	56418	ENSMUST00000143834.1	7797	ENSMUSG00000002741	Ykt6	YKT6 v-SNARE homolog (S. cerevisiae)
1859	chr11	6006201	6006300	100	9.07675e-05	Intron (ENSMUST00000109813.8/12323, intron 3 of 20)	12323	ENSMUST00000130427.7	-5753	ENSMUSG00000057897	Camk2b	calcium/calmodulin-dependent protein kinase II, beta
1860	chr11	6007401	6007500	100	0.000188117	Intron (ENSMUST00000109813.8/12323, intron 3 of 20)	12323	ENSMUST00000130427.7	-6953	ENSMUSG00000057897	Camk2b	calcium/calmodulin-dependent protein kinase II, beta
1861	chr11	6008801	6008900	100	0.000736488	Intron (ENSMUST00000109813.8/12323, intron 3 of 20)	12323	ENSMUST00000130427.7	-8353	ENSMUSG00000057897	Camk2b	calcium/calmodulin-dependent protein kinase II, beta
1862	chr11	6355301	6355400	100	0.000736488	Exon (ENSMUST00000003461.14/18293, exon 22 of 23)	52915	ENSMUST00000109787.7	-33674	ENSMUSG00000041164	Zmiz2	zinc finger, MIZ-type containing 2
1863	chr11	6355701	6355800	100	0.000376653	3' UTR	52915	ENSMUST00000109787.7	-33274	ENSMUSG00000041164	Zmiz2	zinc finger, MIZ-type containing 2
1864	chr11	6356301	6356400	100	0.000736488	3' UTR	52915	ENSMUST00000109787.7	-32674	ENSMUSG00000041164	Zmiz2	zinc finger, MIZ-type containing 2
1865	chr11	6405701	6405800	100	0.000376653	3' UTR	102465759	ENSMUST00000184154.1	4071	ENSMUSG00000098516	Mir7651	microRNA 7651
1866	chr11	6416801	6416900	100	0.000376653	5' UTR	268373	ENSMUST00000213200.1	489	ENSMUSG00000071866	Ppia	peptidylprolyl isomerase A
1867	chr11	6419101	6419300	200	3.80274e-07	3' UTR	268373	ENSMUST00000213200.1	2789	ENSMUSG00000071866	Ppia	peptidylprolyl isomerase A
1868	chr11	6419401	6419600	200	1.23315e-08	3' UTR	268373	ENSMUST00000213200.1	3089	ENSMUSG00000071866	Ppia	peptidylprolyl isomerase A
1869	chr11	6474301	6474400	100	0.000376653	3' UTR	19291	ENSMUST00000179343.2	1517	ENSMUSG00000094483	Purb	purine rich element binding protein B
1870	chr11	6474901	6475000	100	0.000376653	3' UTR	19291	ENSMUST00000179343.2	917	ENSMUSG00000094483	Purb	purine rich element binding protein B
1871	chr11	6475201	6475300	100	0.000376653	Exon (ENSMUST00000179343.2/19291, exon 1 of 1)	19291	ENSMUST00000179343.2	617	ENSMUSG00000094483	Purb	purine rich element binding protein B
1872	chr11	6475401	6475600	200	0.000190322	Exon (ENSMUST00000127488.1/ENSMUST00000127488.1, exon 1 of 3)	19291	ENSMUST00000179343.2	317	ENSMUSG00000094483	Purb	purine rich element binding protein B
1873	chr11	6620701	6620900	200	0.000189204	Exon (ENSMUST00000156969.7/21379, exon 4 of 13)	21379	ENSMUST00000131477.1	15	ENSMUSG00000000384	Tbrg4	transforming growth factor beta regulated gene 4
1874	chr11	6749601	6749900	300	7.70201e-05	Distal Intergenic	626419	ENSMUST00000139769.1	-29564	ENSMUSG00000086808	Gm11981	predicted gene 11981
1875	chr11	6750001	6750100	100	0.000736488	Distal Intergenic	626419	ENSMUST00000139769.1	-29964	ENSMUSG00000086808	Gm11981	predicted gene 11981
1876	chr11	6750201	6750300	100	0.000188117	Distal Intergenic	626419	ENSMUST00000139769.1	-30164	ENSMUSG00000086808	Gm11981	predicted gene 11981
1877	chr11	6751601	6751800	200	0.000368244	Distal Intergenic	626419	ENSMUST00000139769.1	-31564	ENSMUSG00000086808	Gm11981	predicted gene 11981
1878	chr11	6752001	6752200	200	4.48816e-06	Distal Intergenic	626419	ENSMUST00000139769.1	-31964	ENSMUSG00000086808	Gm11981	predicted gene 11981
1879	chr11	6753001	6753100	100	0.000188117	Distal Intergenic	626419	ENSMUST00000139769.1	-32964	ENSMUSG00000086808	Gm11981	predicted gene 11981
1880	chr11	6753201	6753300	100	8.97631e-06	Distal Intergenic	626419	ENSMUST00000139769.1	-33164	ENSMUSG00000086808	Gm11981	predicted gene 11981
1881	chr11	6753401	6753500	100	0.000736488	Distal Intergenic	626419	ENSMUST00000139769.1	-33364	ENSMUSG00000086808	Gm11981	predicted gene 11981
1882	chr11	6755001	6755100	100	0.000736488	Distal Intergenic	626419	ENSMUST00000139769.1	-34964	ENSMUSG00000086808	Gm11981	predicted gene 11981
1883	chr11	6755401	6755500	100	3.26219e-07	Distal Intergenic	626419	ENSMUST00000139769.1	-35364	ENSMUSG00000086808	Gm11981	predicted gene 11981
1884	chr11	6756201	6756300	100	7.15818e-10	Distal Intergenic	626419	ENSMUST00000139769.1	-36164	ENSMUSG00000086808	Gm11981	predicted gene 11981
1885	chr11	6756801	6756900	100	0.000188117	Distal Intergenic	626419	ENSMUST00000139769.1	-36764	ENSMUSG00000086808	Gm11981	predicted gene 11981
1886	chr11	6757201	6757400	200	0.000368244	Distal Intergenic	626419	ENSMUST00000139769.1	-37164	ENSMUSG00000086808	Gm11981	predicted gene 11981
1887	chr11	6757901	6758100	200	0.000188339	Distal Intergenic	626419	ENSMUST00000139769.1	-37864	ENSMUSG00000086808	Gm11981	predicted gene 11981
1888	chr11	8433301	8433500	200	0.000413628	3' UTR	319939	ENSMUST00000129074.1	35175	ENSMUSG00000020422	Tns3	tensin 3
1889	chr11	8434001	8434100	100	4.29435e-05	3' UTR	319939	ENSMUST00000129074.1	34575	ENSMUSG00000020422	Tns3	tensin 3
1890	chr11	8450801	8451000	200	0.000209798	Exon (ENSMUST00000239091.1/319939, exon 22 of 31)	319939	ENSMUST00000129074.1	17675	ENSMUSG00000020422	Tns3	tensin 3
1891	chr11	8462401	8462500	100	0.000188117	Intron (ENSMUST00000239091.1/319939, intron 20 of 30)	319939	ENSMUST00000129074.1	6175	ENSMUSG00000020422	Tns3	tensin 3
1892	chr11	8492101	8492200	100	0.000376653	Exon (ENSMUST00000239091.1/319939, exon 17 of 31)	319939	ENSMUST00000129074.1	-23426	ENSMUSG00000020422	Tns3	tensin 3
1893	chr11	8534801	8534900	100	0.000188117	Intron (ENSMUST00000239091.1/319939, intron 10 of 30)	319939	ENSMUST00000131941.1	10451	ENSMUSG00000020422	Tns3	tensin 3
1894	chr11	8544301	8544400	100	0.000188117	Intron (ENSMUST00000239091.1/319939, intron 8 of 30)	319939	ENSMUST00000131941.1	951	ENSMUSG00000020422	Tns3	tensin 3
1895	chr11	8566201	8566300	100	0.000736488	Intron (ENSMUST00000239091.1/319939, intron 4 of 30)	319939	ENSMUST00000134823.1	12821	ENSMUSG00000020422	Tns3	tensin 3
1896	chr11	8574301	8574400	100	0.000376653	Intron (ENSMUST00000239091.1/319939, intron 4 of 30)	319939	ENSMUST00000134823.1	4721	ENSMUSG00000020422	Tns3	tensin 3
1897	chr11	8577901	8578000	100	0.000188117	Intron (ENSMUST00000239091.1/319939, intron 4 of 30)	319939	ENSMUST00000134823.1	1121	ENSMUSG00000020422	Tns3	tensin 3
1898	chr11	8622501	8622600	100	0.000736488	Intron (ENSMUST00000239091.1/319939, intron 1 of 30)	319939	ENSMUST00000239091.1	2287	ENSMUSG00000020422	Tns3	tensin 3
1899	chr11	8921101	8921200	100	3.26219e-07	Intron (ENSMUST00000154153.7/ENSMUST00000154153.7, intron 16 of 49)	15574	ENSMUST00000146002.7	89478	ENSMUSG00000020413	Hus1	HUS1 checkpoint clamp component
1900	chr11	8922201	8922300	100	3.26219e-07	Intron (ENSMUST00000154153.7/ENSMUST00000154153.7, intron 16 of 49)	15574	ENSMUST00000146002.7	88378	ENSMUSG00000020413	Hus1	HUS1 checkpoint clamp component
1901	chr11	16769801	16769900	100	0.000188117	Intron (ENSMUST00000102884.9/13649, intron 1 of 15)	13649	ENSMUST00000139722.1	17571	ENSMUSG00000020122	Egfr	epidermal growth factor receptor
1902	chr11	16779501	16779600	100	4.29435e-05	Intron (ENSMUST00000102884.9/13649, intron 1 of 15)	13649	ENSMUST00000139722.1	27271	ENSMUSG00000020122	Egfr	epidermal growth factor receptor
1903	chr11	16911901	16912000	100	9.07675e-05	3' UTR	13649	ENSMUST00000138518.1	6716	ENSMUSG00000020122	Egfr	epidermal growth factor receptor
1904	chr11	16912201	16912300	100	0.000736488	3' UTR	13649	ENSMUST00000138518.1	7016	ENSMUSG00000020122	Egfr	epidermal growth factor receptor
1905	chr11	16913401	16913500	100	0.000376653	3' UTR	13649	ENSMUST00000138518.1	8216	ENSMUSG00000020122	Egfr	epidermal growth factor receptor
1906	chr11	17159301	17159400	100	7.60547e-07	5' UTR	19058	ENSMUST00000102880.4	38	ENSMUSG00000033953	Ppp3r1	protein phosphatase 3, regulatory subunit B, alpha isoform (calcineurin B, type I)
1907	chr11	17198901	17199000	100	0.000188117	3' UTR	19058	ENSMUST00000154425.1	6057	ENSMUSG00000033953	Ppp3r1	protein phosphatase 3, regulatory subunit B, alpha isoform (calcineurin B, type I)
1908	chr11	17199301	17199400	100	8.97631e-06	3' UTR	19058	ENSMUST00000154425.1	6457	ENSMUSG00000033953	Ppp3r1	protein phosphatase 3, regulatory subunit B, alpha isoform (calcineurin B, type I)
1909	chr11	17199801	17199900	100	0.000736488	3' UTR	19058	ENSMUST00000154425.1	6957	ENSMUSG00000033953	Ppp3r1	protein phosphatase 3, regulatory subunit B, alpha isoform (calcineurin B, type I)
1910	chr11	20062801	20062900	100	4.29435e-05	3' UTR	66713	ENSMUST00000132022.1	49967	ENSMUSG00000020152	Actr2	ARP2 actin-related protein 2
1911	chr11	20063701	20063800	100	0.000736488	3' UTR	66713	ENSMUST00000132022.1	49067	ENSMUSG00000020152	Actr2	ARP2 actin-related protein 2
1912	chr11	20064601	20064700	100	0.000376653	3' UTR	66713	ENSMUST00000132022.1	48167	ENSMUSG00000020152	Actr2	ARP2 actin-related protein 2
1913	chr11	20094201	20094300	100	0.000736488	Exon (ENSMUST00000000137.7/66713, exon 3 of 9)	66713	ENSMUST00000132022.1	18567	ENSMUSG00000020152	Actr2	ARP2 actin-related protein 2
1914	chr11	20224701	20224800	100	4.29435e-05	Exon (ENSMUST00000020358.11/19324, exon 6 of 6)	19324	ENSMUST00000152728.1	23092	ENSMUSG00000020149	Rab1a	RAB1A, member RAS oncogene family
1915	chr11	20334801	20335300	500	4.9326e-09	Exon (ENSMUST00000180654.1/ENSMUST00000180654.1, exon 1 of 1)	55963	ENSMUST00000109594.7	-2088	ENSMUSG00000020142	Slc1a4	solute carrier family 1 (glutamate/neutral amino acid transporter), member 4
1916	chr11	20335601	20335900	300	1.43145e-05	Exon (ENSMUST00000180654.1/ENSMUST00000180654.1, exon 1 of 1)	55963	ENSMUST00000109594.7	-2888	ENSMUSG00000020142	Slc1a4	solute carrier family 1 (glutamate/neutral amino acid transporter), member 4
1917	chr11	20725701	20725800	100	0.000736488	Exon (ENSMUST00000146722.8/216549, exon 1 of 9)	216549	ENSMUST00000176782.1	372	ENSMUSG00000049659	Aftph	aftiphilin
1918	chr11	20956001	20956100	100	4.24163e-09	Distal Intergenic	216551	ENSMUST00000154300.7	-124945	ENSMUSG00000042363	Lgalsl	lectin, galactoside binding-like
1919	chr11	20956301	20956400	100	9.76495e-15	Distal Intergenic	216551	ENSMUST00000154300.7	-125245	ENSMUSG00000042363	Lgalsl	lectin, galactoside binding-like
1920	chr11	20956601	20957100	500	0.000163834	Distal Intergenic	216551	ENSMUST00000154300.7	-125545	ENSMUSG00000042363	Lgalsl	lectin, galactoside binding-like
1921	chr11	20957201	20957400	200	0.000188327	Distal Intergenic	216551	ENSMUST00000154300.7	-126145	ENSMUSG00000042363	Lgalsl	lectin, galactoside binding-like
1922	chr11	20957701	20958500	800	1.5466e-05	Distal Intergenic	216551	ENSMUST00000154300.7	-126645	ENSMUSG00000042363	Lgalsl	lectin, galactoside binding-like
1923	chr11	20958701	20959100	400	5.44303e-05	Distal Intergenic	216551	ENSMUST00000154300.7	-127645	ENSMUSG00000042363	Lgalsl	lectin, galactoside binding-like
1924	chr11	20959201	20959300	100	0.000188117	Distal Intergenic	216551	ENSMUST00000154300.7	-128145	ENSMUSG00000042363	Lgalsl	lectin, galactoside binding-like
1925	chr11	20959401	20959500	100	1.98676e-05	Distal Intergenic	216551	ENSMUST00000154300.7	-128345	ENSMUSG00000042363	Lgalsl	lectin, galactoside binding-like
1926	chr11	20959701	20959800	100	0.000376653	Distal Intergenic	216551	ENSMUST00000154300.7	-128645	ENSMUSG00000042363	Lgalsl	lectin, galactoside binding-like
1927	chr11	20959901	20960000	100	9.07675e-05	Distal Intergenic	216551	ENSMUST00000154300.7	-128845	ENSMUSG00000042363	Lgalsl	lectin, galactoside binding-like
1928	chr11	20960101	20960200	100	0.000188117	Distal Intergenic	216551	ENSMUST00000154300.7	-129045	ENSMUSG00000042363	Lgalsl	lectin, galactoside binding-like
1929	chr11	20960901	20961100	200	0.000103992	Distal Intergenic	216551	ENSMUST00000154300.7	-129845	ENSMUSG00000042363	Lgalsl	lectin, galactoside binding-like
1930	chr11	20961201	20961300	100	0.000736488	Distal Intergenic	67245	ENSMUST00000156122.7	-129991	ENSMUSG00000020134	Peli1	pellino 1
1931	chr11	20961601	20961800	200	2.23491e-05	Distal Intergenic	67245	ENSMUST00000156122.7	-129491	ENSMUSG00000020134	Peli1	pellino 1
1932	chr11	20962001	20962100	100	0.000736488	Distal Intergenic	67245	ENSMUST00000156122.7	-129191	ENSMUSG00000020134	Peli1	pellino 1
1933	chr11	20962201	20962700	500	0.000151012	Distal Intergenic	67245	ENSMUST00000156122.7	-128591	ENSMUSG00000020134	Peli1	pellino 1
1934	chr11	20962801	20963000	200	5.48403e-09	Distal Intergenic	67245	ENSMUST00000156122.7	-128291	ENSMUSG00000020134	Peli1	pellino 1
1935	chr11	20963101	20963800	700	0.000186424	Distal Intergenic	67245	ENSMUST00000156122.7	-127491	ENSMUSG00000020134	Peli1	pellino 1
1936	chr11	20963901	20964000	100	1.75465e-06	Distal Intergenic	67245	ENSMUST00000156122.7	-127291	ENSMUSG00000020134	Peli1	pellino 1
1937	chr11	20964101	20965300	1200	0.000141594	Distal Intergenic	67245	ENSMUST00000156122.7	-125991	ENSMUSG00000020134	Peli1	pellino 1
1938	chr11	20965401	20965500	100	0.000376653	Distal Intergenic	67245	ENSMUST00000156122.7	-125791	ENSMUSG00000020134	Peli1	pellino 1
1939	chr11	20965601	20965700	100	1.98676e-05	Distal Intergenic	67245	ENSMUST00000156122.7	-125591	ENSMUSG00000020134	Peli1	pellino 1
1940	chr11	20965901	20966100	200	0.000376653	Distal Intergenic	67245	ENSMUST00000156122.7	-125191	ENSMUSG00000020134	Peli1	pellino 1
1941	chr11	20966501	20966700	200	0.000139442	Distal Intergenic	67245	ENSMUST00000156122.7	-124591	ENSMUSG00000020134	Peli1	pellino 1
1942	chr11	20966801	20967000	200	4.29435e-05	Distal Intergenic	67245	ENSMUST00000156122.7	-124291	ENSMUSG00000020134	Peli1	pellino 1
1943	chr11	20967101	20967200	100	5.87583e-08	Distal Intergenic	67245	ENSMUST00000156122.7	-124091	ENSMUSG00000020134	Peli1	pellino 1
1944	chr11	20967501	20967800	300	2.39292e-05	Distal Intergenic	67245	ENSMUST00000156122.7	-123491	ENSMUSG00000020134	Peli1	pellino 1
1945	chr11	20968001	20968100	100	0.000736488	Distal Intergenic	67245	ENSMUST00000156122.7	-123191	ENSMUSG00000020134	Peli1	pellino 1
1946	chr11	20968401	20968900	500	6.01017e-05	Distal Intergenic	67245	ENSMUST00000156122.7	-122391	ENSMUSG00000020134	Peli1	pellino 1
1947	chr11	20969001	20969400	400	0.000330281	Distal Intergenic	67245	ENSMUST00000156122.7	-121891	ENSMUSG00000020134	Peli1	pellino 1
1948	chr11	20969901	20970000	100	0.000376653	Distal Intergenic	67245	ENSMUST00000156122.7	-121291	ENSMUSG00000020134	Peli1	pellino 1
1949	chr11	20970101	20970200	100	3.99162e-06	Distal Intergenic	67245	ENSMUST00000156122.7	-121091	ENSMUSG00000020134	Peli1	pellino 1
1950	chr11	20970301	20970500	200	0.000190322	Distal Intergenic	67245	ENSMUST00000156122.7	-120791	ENSMUSG00000020134	Peli1	pellino 1
1951	chr11	20970601	20970800	200	0.000376653	Distal Intergenic	67245	ENSMUST00000156122.7	-120491	ENSMUSG00000020134	Peli1	pellino 1
1952	chr11	20970901	20971000	100	1.98676e-05	Distal Intergenic	67245	ENSMUST00000156122.7	-120291	ENSMUSG00000020134	Peli1	pellino 1
1953	chr11	20971301	20971400	100	9.07675e-05	Distal Intergenic	67245	ENSMUST00000156122.7	-119891	ENSMUSG00000020134	Peli1	pellino 1
1954	chr11	20971701	20971900	200	0.000188117	Distal Intergenic	67245	ENSMUST00000156122.7	-119391	ENSMUSG00000020134	Peli1	pellino 1
1955	chr11	20972401	20972600	200	0.000462303	Distal Intergenic	67245	ENSMUST00000156122.7	-118691	ENSMUSG00000020134	Peli1	pellino 1
1956	chr11	20972701	20972800	100	9.07675e-05	Distal Intergenic	67245	ENSMUST00000156122.7	-118491	ENSMUSG00000020134	Peli1	pellino 1
1957	chr11	20973001	20973100	100	0.000188117	Distal Intergenic	67245	ENSMUST00000156122.7	-118191	ENSMUSG00000020134	Peli1	pellino 1
1958	chr11	20973201	20973300	100	0.000736488	Distal Intergenic	67245	ENSMUST00000156122.7	-117991	ENSMUSG00000020134	Peli1	pellino 1
1959	chr11	20973501	20973700	200	0.000378178	Distal Intergenic	67245	ENSMUST00000156122.7	-117591	ENSMUSG00000020134	Peli1	pellino 1
1960	chr11	20975101	20975200	100	9.07675e-05	Distal Intergenic	67245	ENSMUST00000156122.7	-116091	ENSMUSG00000020134	Peli1	pellino 1
1961	chr11	20975301	20975400	100	0.000188117	Distal Intergenic	67245	ENSMUST00000156122.7	-115891	ENSMUSG00000020134	Peli1	pellino 1
1962	chr11	20975501	20975700	200	0.000556571	Distal Intergenic	67245	ENSMUST00000156122.7	-115591	ENSMUSG00000020134	Peli1	pellino 1
1963	chr11	20976201	20976400	200	0.000556571	Distal Intergenic	67245	ENSMUST00000156122.7	-114891	ENSMUSG00000020134	Peli1	pellino 1
1964	chr11	20976501	20976600	100	4.29435e-05	Distal Intergenic	67245	ENSMUST00000156122.7	-114691	ENSMUSG00000020134	Peli1	pellino 1
1965	chr11	20977501	20977600	100	0.000376653	Distal Intergenic	67245	ENSMUST00000156122.7	-113691	ENSMUSG00000020134	Peli1	pellino 1
1966	chr11	20977801	20977900	100	0.000736488	Distal Intergenic	67245	ENSMUST00000156122.7	-113391	ENSMUSG00000020134	Peli1	pellino 1
1967	chr11	20978001	20978100	100	0.000188117	Distal Intergenic	67245	ENSMUST00000156122.7	-113191	ENSMUSG00000020134	Peli1	pellino 1
1968	chr11	20978301	20978500	200	0.000192815	Distal Intergenic	67245	ENSMUST00000156122.7	-112791	ENSMUSG00000020134	Peli1	pellino 1
1969	chr11	20978901	20979300	400	0.000151929	Distal Intergenic	67245	ENSMUST00000156122.7	-111991	ENSMUSG00000020134	Peli1	pellino 1
1970	chr11	20979401	20979500	100	0.000736488	Distal Intergenic	67245	ENSMUST00000156122.7	-111791	ENSMUSG00000020134	Peli1	pellino 1
1971	chr11	20979801	20979900	100	3.26219e-07	Distal Intergenic	67245	ENSMUST00000156122.7	-111391	ENSMUSG00000020134	Peli1	pellino 1
1972	chr11	20980301	20980400	100	4.29435e-05	Distal Intergenic	67245	ENSMUST00000156122.7	-110891	ENSMUSG00000020134	Peli1	pellino 1
1973	chr11	20980501	20980600	100	8.97631e-06	Distal Intergenic	67245	ENSMUST00000156122.7	-110691	ENSMUSG00000020134	Peli1	pellino 1
1974	chr11	20980801	20981000	200	0.000413628	Distal Intergenic	67245	ENSMUST00000156122.7	-110291	ENSMUSG00000020134	Peli1	pellino 1
1975	chr11	20981301	20981400	100	0.000736488	Distal Intergenic	67245	ENSMUST00000156122.7	-109891	ENSMUSG00000020134	Peli1	pellino 1
1976	chr11	20981501	20981800	300	0.000139974	Distal Intergenic	67245	ENSMUST00000156122.7	-109491	ENSMUSG00000020134	Peli1	pellino 1
1977	chr11	20981901	20982200	300	0.000158799	Distal Intergenic	67245	ENSMUST00000156122.7	-109091	ENSMUSG00000020134	Peli1	pellino 1
1978	chr11	20982301	20982400	100	1.75465e-06	Distal Intergenic	67245	ENSMUST00000156122.7	-108891	ENSMUSG00000020134	Peli1	pellino 1
1979	chr11	20982501	20982700	200	0.00019826	Distal Intergenic	67245	ENSMUST00000156122.7	-108591	ENSMUSG00000020134	Peli1	pellino 1
1980	chr11	20983201	20983500	300	0.000521248	Distal Intergenic	67245	ENSMUST00000156122.7	-107791	ENSMUSG00000020134	Peli1	pellino 1
1981	chr11	20983601	20983700	100	9.07675e-05	Distal Intergenic	67245	ENSMUST00000156122.7	-107591	ENSMUSG00000020134	Peli1	pellino 1
1982	chr11	20984101	20984200	100	0.000188117	Distal Intergenic	67245	ENSMUST00000156122.7	-107091	ENSMUSG00000020134	Peli1	pellino 1
1983	chr11	20984301	20984400	100	0.000736488	Distal Intergenic	67245	ENSMUST00000156122.7	-106891	ENSMUSG00000020134	Peli1	pellino 1
1984	chr11	20984501	20984700	200	0.00023371	Distal Intergenic	67245	ENSMUST00000156122.7	-106591	ENSMUSG00000020134	Peli1	pellino 1
1985	chr11	20985001	20985200	200	0.000389716	Distal Intergenic	67245	ENSMUST00000156122.7	-106091	ENSMUSG00000020134	Peli1	pellino 1
1986	chr11	20985301	20985400	100	8.97631e-06	Distal Intergenic	67245	ENSMUST00000156122.7	-105891	ENSMUSG00000020134	Peli1	pellino 1
1987	chr11	20985801	20985900	100	4.29435e-05	Distal Intergenic	67245	ENSMUST00000156122.7	-105391	ENSMUSG00000020134	Peli1	pellino 1
1988	chr11	21091301	21091500	200	4.49582e-07	5' UTR	67245	ENSMUST00000093290.11	10	ENSMUSG00000020134	Peli1	pellino 1
1989	chr11	21092101	21092200	100	9.07675e-05	Promoter	67245	ENSMUST00000149675.1	0	ENSMUSG00000020134	Peli1	pellino 1
1990	chr11	21092401	21092500	100	4.29435e-05	Intron (ENSMUST00000156122.7/67245, intron 1 of 3)	67245	ENSMUST00000149675.1	283	ENSMUSG00000020134	Peli1	pellino 1
1991	chr11	21096001	21096100	100	0.000736488	Intron (ENSMUST00000156122.7/67245, intron 1 of 3)	108167888	ENSMUST00000121233.1	-3434	NA	2610024D14Rik	ATP synthase subunit g, mitochondrial pseudogene
1992	chr11	21096201	21096300	100	0.000736488	Intron (ENSMUST00000156122.7/67245, intron 1 of 3)	108167888	ENSMUST00000121233.1	-3234	NA	2610024D14Rik	ATP synthase subunit g, mitochondrial pseudogene
1993	chr11	21096601	21096900	300	0.000254094	Intron (ENSMUST00000156122.7/67245, intron 1 of 3)	108167888	ENSMUST00000121233.1	-2634	NA	2610024D14Rik	ATP synthase subunit g, mitochondrial pseudogene
1994	chr11	21097901	21098000	100	4.24163e-09	Intron (ENSMUST00000156122.7/67245, intron 1 of 3)	108167888	ENSMUST00000121233.1	-1534	NA	2610024D14Rik	ATP synthase subunit g, mitochondrial pseudogene
1995	chr11	21098401	21098500	100	0.000376653	Intron (ENSMUST00000156122.7/67245, intron 1 of 3)	108167888	ENSMUST00000121233.1	-1034	NA	2610024D14Rik	ATP synthase subunit g, mitochondrial pseudogene
1996	chr11	21098701	21098800	100	9.07675e-05	Intron (ENSMUST00000156122.7/67245, intron 1 of 3)	108167888	ENSMUST00000121233.1	-734	NA	2610024D14Rik	ATP synthase subunit g, mitochondrial pseudogene
1997	chr11	21101201	21101300	100	0.000736488	Intron (ENSMUST00000156122.7/67245, intron 1 of 3)	108167888	ENSMUST00000121233.1	1667	NA	2610024D14Rik	ATP synthase subunit g, mitochondrial pseudogene
1998	chr11	21105501	21105600	100	0.000376653	Intron (ENSMUST00000156122.7/67245, intron 1 of 3)	108167888	ENSMUST00000121233.1	5967	NA	2610024D14Rik	ATP synthase subunit g, mitochondrial pseudogene
1999	chr11	21108001	21108100	100	9.07675e-05	Intron (ENSMUST00000156122.7/67245, intron 1 of 3)	108167888	ENSMUST00000121233.1	8467	NA	2610024D14Rik	ATP synthase subunit g, mitochondrial pseudogene
[truncated: 33,981 more rows]

## Sheet: 5002 binding genes
GeneID	EnsembleID	Symbol	Name	PeakNum
319263	ENSMUSG00000051285	Pcmtd1	protein-L-isoaspartate (D-aspartate) O-methyltransferase domain containing 1	2
71096	ENSMUSG00000025909	Sntg1	syntrophin, gamma 1	7
76187	ENSMUSG00000025911	Adhfe1	alcohol dehydrogenase, iron containing, 1	2
76982	ENSMUSG00000067879	Vxn	vexin	4
73331	NA	1700034P13Rik	RIKEN cDNA 1700034P13 gene	2
73824	ENSMUSG00000098234	Snhg6	small nucleolar RNA host gene 6	4
26754	ENSMUSG00000025917	Cops5	COP9 signalosome subunit 5	2
211660	ENSMUSG00000056763	Cspp1	centrosome and spindle pole associated protein 1	16
211673	ENSMUSG00000067851	Arfgef1	ADP-ribosylation factor guanine nucleotide-exchange factor 1(brefeldin A-inhibited)	5
72265	ENSMUSG00000025935	Tram1	translocating chain-associating membrane protein 1	2
212442	ENSMUSG00000025937	Lactb2	lactamase, beta 2	7
381246	ENSMUSG00000067813	Xkr9	X-linked Kx blood group related 9	24
277328	ENSMUSG00000032769	Trpa1	transient receptor potential cation channel, subfamily A, member 1	3
19989	ENSMUSG00000043716	Rpl7	ribosomal protein L7	7
66799	ENSMUSG00000025939	Ube2w	ubiquitin-conjugating enzyme E2W (putative)	1
75028	ENSMUSG00000089914	4930486I03Rik	RIKEN cDNA 4930486I03 gene	3
241035	ENSMUSG00000043760	Pkhd1	polycystic kidney and hepatic disease 1	27
387225	ENSMUSG00000065405	Mir30a	microRNA 30a	10
723964	ENSMUSG00000065567	Mir30c-2	microRNA 30c-2	7
98366	ENSMUSG00000026155	Smap1	small ArfGAP 1	2
68187	ENSMUSG00000026153	Fam135a	family with sequence similarity 135, member A	9
12823	ENSMUSG00000026141	Col19a1	collagen, type XIX, alpha 1	2
210933	ENSMUSG00000033569	Adgrb3	adhesion G protein-coupled receptor B3	8
213109	ENSMUSG00000048874	Phf3	PHD finger protein 3	11
13518	ENSMUSG00000026131	Dst	dystonin	78
226970	ENSMUSG00000037509	Arhgef4	Rho guanine nucleotide exchange factor (GEF) 4	5
226971	ENSMUSG00000026123	Plekhb2	pleckstrin homology domain containing, family B (evectins) member 2	3
102465541	ENSMUSG00000098680	Mir6898	microRNA 6898	3
226976	ENSMUSG00000010453	Kansl3	KAT8 regulatory NSL complex subunit 3	1
12859	ENSMUSG00000061518	Cox5b	cytochrome c oxidase subunit 5B	1
226977	ENSMUSG00000037351	Actr1b	ARP1 actin-related protein 1B, centractin beta	3
56030	ENSMUSG00000026116	Tmem131	transmembrane protein 131	3
269180	ENSMUSG00000026113	Inpp4a	inositol polyphosphate-4-phosphatase, type I	5
76178	ENSMUSG00000026112	Coa5	cytochrome C oxidase assembly factor 5	2
56210	ENSMUSG00000026082	Rev1	REV1, DNA directed polymerase	3
26921	ENSMUSG00000026074	Map4k4	mitogen-activated protein kinase kinase kinase kinase 4	15
14200	ENSMUSG00000008136	Fhl2	four and a half LIM domains 2	2
22019	ENSMUSG00000041763	Tpp2	tripeptidyl peptidase II	4
227058	ENSMUSG00000041144	Dnah7b	dynein, axonemal, heavy chain 7B	2
442821	ENSMUSG00000101799	9330175M20Rik	RIKEN cDNA 9330175M20 gene	2
14660	ENSMUSG00000026103	Gls	glutaminase	2
17936	ENSMUSG00000002881	Nab1	Ngfi-A binding protein 1	4
627872	ENSMUSG00000096141	Dnah7a	dynein, axonemal, heavy chain 7A	2
329154	ENSMUSG00000052331	Ankrd44	ankyrin repeat domain 44	22
81898	ENSMUSG00000025982	Sf3b1	splicing factor 3b, subunit 1	12
15510	ENSMUSG00000025980	Hspd1	heat shock protein 1 (chaperonin)	1
19070	ENSMUSG00000025979	Mob4	MOB family member 4, phocein	1
227120	ENSMUSG00000038349	Plcl1	phospholipase C-like 1	2
71066	ENSMUSG00000045336	Hsfy2	heat shock transcription factor, Y-linked 2	2
68736	ENSMUSG00000048495	Tyw5	tRNA-yW synthesizing protein 5	1
12747	ENSMUSG00000026034	Clk1	CDC-like kinase 1	9
12633	ENSMUSG00000026031	Cflar	CASP8 and FADD-like apoptosis regulator	2
70827	ENSMUSG00000026028	Trak2	trafficking protein, kinesin binding 2	4
227157	ENSMUSG00000079550	Mpp4	membrane protein, palmitoylated 4 (MAGUK p55 subfamily member 4)	2
381260	ENSMUSG00000047361	Gm973	predicted gene 973	2
55989	ENSMUSG00000026020	Nop58	NOP58 ribonucleoprotein	1
12168	ENSMUSG00000067336	Bmpr2	bone morphogenetic protein receptor, type II (serine/threonine kinase)	4
269198	ENSMUSG00000073664	Nbeal1	neurobeachin like 1	5
12487	ENSMUSG00000026012	Cd28	CD28 antigen	4
227195	ENSMUSG00000040865	Ino80d	INO80 complex subunit D	5
100380944	ENSMUSG00000084799	Ino80dos	INO80 complex subunit D, opposite strand	4
100217464	ENSMUSG00000064602	Snora41	small nucleolar RNA, H/ACA box 41	4
93691	ENSMUSG00000025959	Klf7	Kruppel-like factor 7 (ubiquitous)	3
12912	ENSMUSG00000025958	Creb1	cAMP responsive element binding protein 1	1
67099	ENSMUSG00000025956	Mettl21a	methyltransferase like 21A	1
11363	ENSMUSG00000026003	Acadl	acyl-Coenzyme A dehydrogenase, long-chain	1
381269	ENSMUSG00000039395	Mreg	melanoregulin	5
21961	ENSMUSG00000055322	Tns1	tensin 1	304
76709	ENSMUSG00000006304	Arpc2	actin related protein 2/3 complex, subunit 2	2
227289	ENSMUSG00000064272	Gpbar1	G protein-coupled bile acid receptor 1	4
387219	ENSMUSG00000065468	Mir26b	microRNA 26b	3
67534	ENSMUSG00000033257	Ttll4	tubulin tyrosine ligase-like family, member 4	6
22409	ENSMUSG00000026167	Wnt10a	wingless-type MMTV integration site family, member 10A	11
69171	ENSMUSG00000033159	Cnppd1	cyclin Pas1/PHO80 domain containing 1	2
74577	ENSMUSG00000026200	Glb1l	galactosidase, beta 1-like	2
20872	ENSMUSG00000026201	Stk16	serine/threonine kinase 16	1
56812	ENSMUSG00000026203	Dnajb2	DnaJ heat shock protein family (Hsp40) member B2	1
19275	ENSMUSG00000026204	Ptprn	protein tyrosine phosphatase, receptor type, N	2
13437	ENSMUSG00000026209	Dnpep	aspartyl aminopeptidase	1
74205	ENSMUSG00000032883	Acsl3	acyl-CoA synthetase long-chain family member 3	23
195434	ENSMUSG00000079470	Utp14b	UTP14B small subunit processome component	7
69368	ENSMUSG00000073643	Wdfy1	WD repeat and FYVE domain containing 1	11
26554	ENSMUSG00000004364	Cul3	cullin 3	3
14897	ENSMUSG00000026219	Trip12	thyroid hormone receptor interactor 12	15
381287	ENSMUSG00000089844	A530032D15Rik	RIKEN cDNA A530032D15Rik gene	1
80828	ENSMUSG00000064823	Snord82	small nucleolar RNA, C/D box 82	3
19231	ENSMUSG00000026238	Ptma	prothymosin alpha	8
208718	ENSMUSG00000053333	Dis3l2	DIS3 like 3'-5' exoribonuclease 2	2
11650	ENSMUSG00000026246	Alppl2	alkaline phosphatase, placental-like 2	6
26987	ENSMUSG00000026254	Eif4e2	eukaryotic translation initiation factor 4E member 2	4
77040	ENSMUSG00000026289	Atg16l1	autophagy related 16-like 1 (S. cerevisiae)	2
100217415	ENSMUSG00000089281	Scarna6	small Cajal body-specific RNA 6	3
227333	ENSMUSG00000070738	Dgkd	diacylglycerol kinase, delta	2
227334	ENSMUSG00000005501	Usp40	ubiquitin specific peptidase 40	2
320982	ENSMUSG00000049866	Arl4c	ADP-ribosylation factor-like 4C	1
347722	ENSMUSG00000055013	Agap1	ArfGAP with GTPase domain, ankyrin repeat and PH domain 1	64
74403	NA	4933400F21Rik	RIKEN cDNA 4933400F21 gene	23
14472	ENSMUSG00000034486	Gbx2	gastrulation brain homeobox 2	24
16978	ENSMUSG00000026305	Lrrfip1	leucine rich repeat (in FLII) interacting protein 1	5
67921	ENSMUSG00000034343	Ube2f	ubiquitin-conjugating enzyme E2F (putative)	3
55927	ENSMUSG00000067071	Hes6	hairy and enhancer of split 6	1
18627	ENSMUSG00000055866	Per2	period circadian clock 2	2
404545	ENSMUSG00000034107	Ano7	anoctamin 7	15
110611	ENSMUSG00000034088	Hdlbp	high density lipoprotein (HDL) binding protein	7
227377	ENSMUSG00000034066	Farp2	FERM, RhoGEF and pleckstrin domain protein 2	2
59041	ENSMUSG00000026277	Stk25	serine/threonine kinase 25 (yeast)	5
74689	ENSMUSG00000100518	4930440C22Rik	RIKEN cDNA 4930440C22 gene	2
20452	ENSMUSG00000040710	St8sia4	ST8 alpha-N-acetyl-neuraminide alpha-2,8-sialyltransferase 4	3
75381	ENSMUSG00000100777	4930598F16Rik	RIKEN cDNA 4930598F16 gene	5
67854	ENSMUSG00000045463	Slco6b1	solute carrier organic anion transporter family, member 6b1	3
18484	ENSMUSG00000026335	Pam	peptidylglycine alpha-amidating monooxygenase	6
100504525	ENSMUSG00000100684	Gm20268	predicted gene, 20268	2
100504568	ENSMUSG00000097482	Gm17634	predicted gene, 17634	4
227446	ENSMUSG00000026319	Relch	RAB11 binding and LisH domain, coiled-coil and HEAT repeat containing	5
226352	ENSMUSG00000026383	Epb41l5	erythrocyte membrane protein band 4.1 like 5	6
170706	ENSMUSG00000050777	Tmem37	transmembrane protein 37	1
13167	ENSMUSG00000026385	Dbi	diazepam binding inhibitor	1
72999	ENSMUSG00000003721	Insig2	insulin induced gene 2	5
74117	ENSMUSG00000026341	Actr3	ARP3 actin-related protein 3	3
72949	ENSMUSG00000026349	Ccnt2	cyclin T2	15
226409	ENSMUSG00000036086	Zranb3	zinc finger, RAN-binding domain containing 3	2
226412	ENSMUSG00000056211	R3hdm1	R3H domain containing 1	3
210417	ENSMUSG00000042581	Thsd7b	thrombospondin, type I, domain containing 7B	2
12270	NA	C4bp-ps1	complement component 4 binding protein, pseudogene 1	6
212439	ENSMUSG00000042510	AA986860	expressed sequence AA986860	25
433347	ENSMUSG00000100106	Gm28856	predicted gene 28856	2
17164	ENSMUSG00000016528	Mapkapk2	MAP kinase-activated protein kinase 2	3
16865	ENSMUSG00000026427	Eif2d	eukaryotic translation initiation factor 2D	3
56489	ENSMUSG00000042349	Ikbke	inhibitor of kappaB kinase epsilon	4
14270	ENSMUSG00000026425	Srgap2	SLIT-ROBO Rho GTPase activating protein 2	4
13034	ENSMUSG00000004552	Ctse	cathepsin E	15
212980	ENSMUSG00000026435	Slc45a3	solute carrier family 45, member 3	4
213006	ENSMUSG00000059149	Mfsd4a	major facilitator superfamily domain containing 4A	10
74137	ENSMUSG00000009772	Nuak2	NUAK family, SNF1-like kinase, 2	56
17248	ENSMUSG00000054387	Mdm4	transformed mouse 3T3 cell double minute 4	110
70579	ENSMUSG00000102976	Zc3h11a	zinc finger CCCH type containing 11A	6
667118	ENSMUSG00000094410	Zbed6	zinc finger, BED type containing 6	29
98710	ENSMUSG00000042229	Rabif	RAB interacting factor	2
75605	ENSMUSG00000042207	Kdm5b	lysine (K)-specific demethylase 5B	4
329251	ENSMUSG00000073557	Ppp1r12b	protein phosphatase 1, regulatory subunit 12B	2
68724	ENSMUSG00000026426	Arl8a	ADP-ribosylation factor-like 8A	3
13710	ENSMUSG00000003051	Elf3	E74-like factor 3	1
226432	ENSMUSG00000041879	Ipo9	importin 9	1
27280	ENSMUSG00000041801	Phlda3	pleckstrin homology like domain, family A, member 3	2
735252	ENSMUSG00000065565	Mir181a-1	microRNA 181a-1	5
59125	ENSMUSG00000026393	Nek7	NIMA (never in mitosis gene a)-related expressed kinase 7	9
214498	ENSMUSG00000026361	Cdc73	cell division cycle 73, Paf1/RNA polymerase II complex component	6
20028	ENSMUSG00000006007	Pdc	phosducin	2
69399	ENSMUSG00000032666	1700025G04Rik	RIKEN cDNA 1700025G04 gene	38
67771	ENSMUSG00000008475	Arpc5	actin related protein 2/3 complex, subunit 5	4
226517	ENSMUSG00000042772	Smg7	Smg-7 homolog, nonsense mediated mRNA decay factor (C. elegans)	8
226519	ENSMUSG00000026478	Lamc1	laminin, gamma 1	6
102466257	ENSMUSG00000099227	Mir8114	microRNA 8114	1
14645	ENSMUSG00000026473	Glul	glutamate-ammonia ligase (glutamine synthetase)	41
19775	ENSMUSG00000026469	Xpr1	xenotropic and polytropic retrovirus receptor 1	2
74081	ENSMUSG00000033671	Cep350	centrosomal protein 350	3
240832	ENSMUSG00000050565	Tor1aip2	torsin A interacting protein 2	9
77352	ENSMUSG00000026601	Axdnd1	axonemal dynein light chain domain containing 1	3
11352	ENSMUSG00000026596	Abl2	v-abl Abelson murine leukemia viral oncogene 2 (arg, Abelson-related gene)	8
30935	ENSMUSG00000060519	Tor3a	torsin family 3, member A	2
78255	ENSMUSG00000026594	Ralgps2	Ral GEF with PH domain and SH3 binding motif 2	1
381305	ENSMUSG00000040423	Rc3h1	RING CCCH (C3H) domains 1	1
14455	ENSMUSG00000053332	Gas5	growth arrest specific 5	3
11758	ENSMUSG00000026701	Prdx6	peroxiredoxin 6	4
100038657	ENSMUSG00000091060	Myocos	myocilin opposite strand	5
226562	ENSMUSG00000040225	Prrc2c	proline-rich coiled-coil 2C	28
116914	ENSMUSG00000040918	Slc19a2	solute carrier family 19 (thiamine transporter), member 2	4
11931	ENSMUSG00000026576	Atp1b1	ATPase, Na+/K+ transporting, beta 1 polypeptide	14
108735	ENSMUSG00000040848	Sft2d2	SFT2 domain containing 2	2
74106	ENSMUSG00000026571	Dcaf6	DDB1 and CUL4 associated factor 6	4
70456	ENSMUSG00000026568	Mpc2	mitochondrial pyruvate carrier 2	1
433375	ENSMUSG00000040713	Creg1	cellular repressor of E1A-stimulated genes 1	1
56752	ENSMUSG00000026687	Aldh9a1	aldehyde dehydrogenase 9, subfamily A1	5
18514	ENSMUSG00000052534	Pbx1	pre B cell leukemia homeobox 1	32
16589	ENSMUSG00000026667	Uhmk1	U2AF homology motif (UHM) kinase 1	2
70729	ENSMUSG00000038473	Nos1ap	nitric oxide synthase 1 (neuronal) adaptor protein	4
320078	ENSMUSG00000038463	Olfml2b	olfactomedin-like 2B	1
14130	ENSMUSG00000026656	Fcgr2b	Fc receptor, IgG, low affinity IIb	6
75472	ENSMUSG00000026649	Cfap126	cilia and flagella associated protein 126	2
14127	ENSMUSG00000058715	Fcer1g	Fc receptor, IgE, high affinity I, gamma polypeptide	1
226646	ENSMUSG00000013593	Ndufs2	NADH:ubiquinone oxidoreductase core subunit S2	1
30941	ENSMUSG00000053483	Usp21	ubiquitin specific peptidase 21	1
16456	ENSMUSG00000038235	F11r	F11 receptor	1
59287	ENSMUSG00000003458	Ncstn	nicastrin	2
12847	ENSMUSG00000026553	Copa	coatomer protein complex subunit alpha	3
98193	ENSMUSG00000026554	Dcaf8	DDB1 and CUL4 associated factor 8	15
18611	ENSMUSG00000013698	Pea15a	phosphoprotein enriched in astrocytes 15A	16
21346	ENSMUSG00000026547	Tagln2	transgelin 2	2
12944	ENSMUSG00000037942	Crp	C-reactive protein, pentraxin-related	2
545389	ENSMUSG00000057335	Cep170	centrosomal protein 170	7
76816	ENSMUSG00000026504	Sdccag8	serologically defined colon cancer antigen 8	7
23797	ENSMUSG00000019699	Akt3	thymoma viral proto-oncogene 3	7
75589	ENSMUSG00000101746	2310043L19Rik	RIKEN cDNA 2310043L19 gene	1
11566	ENSMUSG00000015961	Adss	adenylosuccinate synthetase, non muscle	3
66359	ENSMUSG00000026500	Cox20	cytochrome c oxidase assembly protein 20	3
51810	ENSMUSG00000039630	Hnrnpu	heterogeneous nuclear ribonucleoprotein U	38
226747	ENSMUSG00000026491	Ahctf1	AT hook containing transcription factor 1	3
226751	ENSMUSG00000026490	Cdc42bpa	CDC42 binding protein kinase alpha	8
15078	ENSMUSG00000060743	H3f3a	H3.3 histone A	4
226757	ENSMUSG00000038733	Wdr26	WD repeat domain 26	28
13244	ENSMUSG00000038633	Degs1	delta(4)-desaturase, sphingolipid 1	12
12334	ENSMUSG00000026509	Capn2	calpain 2	6
108909	ENSMUSG00000042901	Aida	axin interactor, dorsalization associated	3
67247	ENSMUSG00000073481	Mtarc2	mitochondrial amidoxime reducing component 2	2
226777	ENSMUSG00000039349	C130074G19Rik	RIKEN cDNA C130074G19 gene	2
67769	ENSMUSG00000039210	Gpatch2	G patch domain containing 2	1
19250	ENSMUSG00000026604	Ptpn14	protein tyrosine phosphatase, non-receptor type 14	5
226830	ENSMUSG00000026603	Smyd2	SET and MYND domain containing 2	7
226849	ENSMUSG00000026626	Ppp2r5a	protein phosphatase 2, regulatory subunit B', alpha	5
18005	ENSMUSG00000026622	Nek2	NIMA (never in mitosis gene a)-related expressed kinase 2	9
98736	ENSMUSG00000055833	1700034H15Rik	RIKEN cDNA 1700034H15 gene	12
22033	ENSMUSG00000026637	Traf5	TNF receptor-associated factor 5	5
214742	ENSMUSG00000037395	Rcor3	REST corepressor 3	2
214791	ENSMUSG00000016262	Sertad4	SERTA domain containing 4	21
329324	ENSMUSG00000016200	Syt14	synaptotagmin XIV	42
215303	ENSMUSG00000016179	Camk1g	calcium/calmodulin-dependent protein kinase I gamma	2
18845	ENSMUSG00000026640	Plxna2	plexin A2	11
100628615	ENSMUSG00000092633	Mir3962	microRNA 3962	1
320977	ENSMUSG00000096929	A330023F24Rik	RIKEN cDNA A330023F24 gene	6
320400	ENSMUSG00000097325	Gm16897	predicted gene, 16897	10
723963	ENSMUSG00000065412	Mir29b-2	microRNA 29b-2	1
270685	ENSMUSG00000040675	Mthfd1l	methylenetetrahydrofolate dehydrogenase (NADP+ dependent) 1-like	2
83397	ENSMUSG00000038587	Akap12	A kinase (PRKA) anchor protein (gravin) 12	31
381990	ENSMUSG00000075327	Zbtb2	zinc finger and BTB domain containing 2	3
22353	ENSMUSG00000019772	Vip	vasoactive intestinal polypeptide	4
67141	ENSMUSG00000019773	Fbxo5	F-box protein 5	9
23924	ENSMUSG00000019794	Katna1	katanin p60 (ATPase-containing) subunit A1	3
68652	ENSMUSG00000015755	Tab2	TGF-beta activated kinase 1/MAP3K7 binding protein 2	3
338362	ENSMUSG00000047712	Ust	uronyl-2-sulfotransferase	12
22288	ENSMUSG00000019820	Utrn	utrophin	5
215798	ENSMUSG00000039116	Adgrg6	adhesion G protein-coupled receptor G6	4
18101	ENSMUSG00000019865	Nmbr	neuromedin B receptor	4
17684	ENSMUSG00000039910	Cited2	Cbp/p300-interacting transactivator, with Glu/Asp-rich carboxy-terminal domain, 2	2
19707	ENSMUSG00000019854	Reps1	RalBP1 associated Eps domain containing protein	1
64058	ENSMUSG00000019851	Perp	PERP, TP53 apoptosis effector	11
21929	ENSMUSG00000019850	Tnfaip3	tumor necrosis factor, alpha-induced protein 3	1
18634	ENSMUSG00000020003	Pex7	peroxisomal biogenesis factor 7	2
26408	ENSMUSG00000071369	Map3k5	mitogen-activated protein kinase kinase kinase 5	35
17761	ENSMUSG00000019996	Map7	microtubule-associated protein 7	1
72567	ENSMUSG00000037608	Bclaf1	BCL2-associated transcription factor 1	20
73990	ENSMUSG00000112654	4930455C13Rik	RIKEN cDNA 4930455C13 gene	1
432436	ENSMUSG00000056716	Gm5420	predicted gene 5420	200
20393	ENSMUSG00000019970	Sgk1	serum/glucocorticoid regulated kinase 1	25
667281	ENSMUSG00000075297	H60b	histocompatibility 60b	3
606736	NA	C920009B18Rik	RIKEN cDNA C920009B18 gene	2
102465768	ENSMUSG00000098714	Mir7663	microRNA 7663	1
237336	ENSMUSG00000071359	Tbpl1	TATA box binding protein-like 1	16
20042	ENSMUSG00000061983	Rps12	ribosomal protein S12	2
53331	ENSMUSG00000019998	Stx7	syntaxin 7	2
14219	ENSMUSG00000019997	Ccn2	cellular communication network factor 2	2
102638890	NA	Gm15270	predicted gene 15270	14
13822	ENSMUSG00000019978	Epb41l2	erythrocyte membrane protein band 4.1 like 2	5
19272	ENSMUSG00000019889	Ptprk	protein tyrosine phosphatase, receptor type, K	12
67719	ENSMUSG00000015519	2310057J18Rik	RIKEN cDNA 2310057J18 gene	1
68031	ENSMUSG00000038876	Rnf146	ring finger protein 146	3
72780	ENSMUSG00000019880	Rspo3	R-spondin 3	3
66847	ENSMUSG00000019791	Hint3	histidine triad nucleotide binding protein 3	2
22110	ENSMUSG00000047514	Tspyl1	testis-specific protein, Y-encoded-like 1	3
14302	ENSMUSG00000019779	Frk	fyn-related kinase	2
319415	ENSMUSG00000044499	Hs3st5	heparan sulfate (glucosamine) 3-O-sulfotransferase 5	2
15182	ENSMUSG00000019777	Hdac2	histone deacetylase 2	3
19714	ENSMUSG00000019841	Rev3l	REV3 like, DNA directed polymerase zeta catalytic subunit	2
19850	ENSMUSG00000106147	Snord3a	small nucleolar RNA, C/D box 3A	2
100041585	ENSMUSG00000063953	Amd2	S-adenosylmethionine decarboxylase 2	2
268294	ENSMUSG00000019826	Zbtb24	zinc finger and BTB domain containing 24	11
20598	ENSMUSG00000019822	Smpd2	sphingomyelin phosphodiesterase 2, neutral	3
53599	ENSMUSG00000019818	Cd164	CD164 antigen	8
213402	ENSMUSG00000071324	Armc2	armadillo repeat containing 2	1
56484	ENSMUSG00000048756	Foxo3	forkhead box O3	19
54198	ENSMUSG00000019804	Snx3	sorting nexin 3	3
14628	ENSMUSG00000038280	Ostm1	osteopetrosis associated transmembrane protein 1	1
140740	ENSMUSG00000019802	Sec63	SEC63-like (S. cerevisiae)	3
12484	ENSMUSG00000047139	Cd24a	CD24a antigen	9
320363	ENSMUSG00000110874	D030045P18Rik	RIKEN cDNA D030045P18 gene	7
77987	ENSMUSG00000038774	Ascc3	activating signal cointegrator 1 complex subunit 3	15
215031	ENSMUSG00000049641	Vgll2	vestigial like family member 2	1
102640560	ENSMUSG00000112833	Gm36595	predicted gene, 36595	2
15500	ENSMUSG00000019878	Hsf2	heat shock factor 2	3
56442	ENSMUSG00000019877	Serinc1	serine incorporator 1	1
110829	ENSMUSG00000019920	Lims1	LIM and senescent cell antigen-like domains 1	2
76138	ENSMUSG00000038010	Ccdc138	coiled-coil domain containing 138	6
18451	ENSMUSG00000019916	P4ha1	procollagen-proline, 2-oxoglutarate 4-dioxygenase (proline 4-hydroxylase), alpha 1 polypeptide	4
69836	ENSMUSG00000009646	Pla2g12b	phospholipase A2, group XIIB	5
215999	ENSMUSG00000009647	Mcu	mitochondrial calcium uniporter	1
56709	ENSMUSG00000020109	Dnajb12	DnaJ heat shock protein family (Hsp40) member B12	3
74747	ENSMUSG00000020108	Ddit4	DNA-damage-inducible transcript 4	9
52717	ENSMUSG00000020107	Anapc16	anaphase promoting complex subunit 16	7
22295	ENSMUSG00000012819	Cdh23	cadherin 23 (otocadherin)	11
13180	ENSMUSG00000020098	Pcbd1	pterin 4 alpha carbinolamine dehydratase/dimerization cofactor of hepatocyte nuclear factor 1 alpha (TCF1) 1	2
20397	ENSMUSG00000020097	Sgpl1	sphingosine phosphate lyase 1	1
18119	ENSMUSG00000037171	Nodal	nodal	14
15275	ENSMUSG00000037012	Hk1	hexokinase 1	4
338359	ENSMUSG00000020079	Supv3l1	suppressor of var1, 3-like 1 (S. cerevisiae)	1
94213	ENSMUSG00000020076	Ddx50	DExD box helicase 50	2
67500	ENSMUSG00000020074	Ccar1	cell division cycle and apoptosis regulator 1	4
216028	ENSMUSG00000042846	Lrrtm3	leucine rich repeat transmembrane neuronal 3	1
102634101	ENSMUSG00000112925	Gm31763	predicted gene, 31763	3
108829	ENSMUSG00000037876	Jmjd1c	jumonji domain containing 1C	10
11735	ENSMUSG00000069601	Ank3	ankyrin 3, epithelial	8
52696	ENSMUSG00000019923	Zwint	ZW10 interactor	3
74392	ENSMUSG00000033444	Specc1l	sperm antigen with calponin homology and coiled-coil domains 1-like	2
68778	ENSMUSG00000033416	Gucd1	guanylyl cyclase domain containing 1	1
104248	ENSMUSG00000020196	Cabin1	calcineurin binding protein 1	4
17319	ENSMUSG00000033307	Mif	macrophage migration inhibitory factor (glycosylation-inhibiting factor)	4
16987	ENSMUSG00000033105	Lss	lanosterol synthase	8
12833	ENSMUSG00000001119	Col6a1	collagen, type VI, alpha 1	6
12822	ENSMUSG00000001435	Col18a1	collagen, type XVIII, alpha 1	36
108705	ENSMUSG00000009291	Pttg1ip	pituitary tumor-transforming 1 interacting protein	10
20610	ENSMUSG00000020265	Sumo3	small ubiquitin-like modifier 3	4
100316811	ENSMUSG00000089424	Mir1930	microRNA 1930	2
67884	ENSMUSG00000020284	Cfap410	cilia and flagella associated protein 410	3
18641	ENSMUSG00000020277	Pfkl	phosphofructokinase, liver, B-type	9
28295	ENSMUSG00000053329	Gatd3a	glutamine amidotransferase like class 1 domain containing 3A	4
28169	ENSMUSG00000001211	Agpat3	1-acylglycerol-3-phosphate O-acyltransferase 3	2
18114	ENSMUSG00000061032	Rrp1	ribosomal RNA processing 1	2
71709	ENSMUSG00000032714	Syde1	synapse defective 1, Rho GTPase, homolog 1 (C. elegans)	1
624845	ENSMUSG00000091468	Vmn2r82	vomeronasal 2, receptor 82	15
625029	ENSMUSG00000091381	Vmn2r83	vomeronasal 2, receptor 83	13
102465548	ENSMUSG00000098414	Mir6909	microRNA 6909	7
216150	ENSMUSG00000020307	Cdc34	cell division cycle 34	1
16904	ENSMUSG00000054206	Gzmm	granzyme M (lymphocyte met-ase 1)	2
12215	ENSMUSG00000023175	Bsg	basigin	23
414101	ENSMUSG00000091994	E130317F20Rik	RIKEN cDNA E130317F20 gene	1
19205	ENSMUSG00000006498	Ptbp1	polypyrimidine tract binding protein 1	4
102465549	ENSMUSG00000098562	Mir6910	microRNA 6910	2
11537	ENSMUSG00000061780	Cfd	complement factor D (adipsin)	1
109284	ENSMUSG00000035781	R3hdm4	R3H domain containing 4	1
216157	ENSMUSG00000013858	Tmem259	transmembrane protein 259	2
625249	ENSMUSG00000075706	Gpx4	glutathione peroxidase 4	9
216161	ENSMUSG00000035673	Sbno2	strawberry notch 2	5
20869	ENSMUSG00000003068	Stk11	serine/threonine kinase 11	6
66043	ENSMUSG00000003072	Atp5d	ATP synthase, H+ transporting, mitochondrial F1 complex, delta subunit	2
59090	ENSMUSG00000035621	Midn	midnolin	16
12696	ENSMUSG00000045193	Cirbp	cold inducible RNA binding protein	6
102466207	ENSMUSG00000098672	Mir6911	microRNA 6911	2
70248	ENSMUSG00000069565	Dazap1	DAZ associated protein 1	2
20054	ENSMUSG00000063457	Rps15	ribosomal protein S15	2
66594	ENSMUSG00000020163	Uqcr11	ubiquinol-cytochrome c reductase, complex III subunit XI	1
66932	ENSMUSG00000047417	Rexo1	REX1, RNA exonuclease 1	6
216169	ENSMUSG00000003346	Abhd17a	abhydrolase domain containing 17A	4
103236	ENSMUSG00000003345	Csnk1g2	casein kinase 1, gamma 2	3
17347	ENSMUSG00000020190	Mknk2	MAP kinase-interacting serine/threonine kinase 2	20
11776	ENSMUSG00000020198	Ap3d1	adaptor-related protein complex 3, delta 1 subunit	9
208266	ENSMUSG00000061589	Dot1l	DOT1-like, histone H3 methyltransferase (S. cerevisiae)	1
78670	ENSMUSG00000035278	Plekhj1	pleckstrin homology domain containing, family J member 1	2
18245	ENSMUSG00000035242	Oaz1	ornithine decarboxylase antizyme 1	5
100316778	ENSMUSG00000087993	Mir1982	microRNA 1982	5
30055	ENSMUSG00000020219	Timm13	translocase of inner mitochondrial membrane 13	2
26396	ENSMUSG00000035027	Map2k2	mitogen-activated protein kinase kinase 2	3
16969	ENSMUSG00000035011	Zbtb7a	zinc finger and BTB domain containing 7a	4
59004	ENSMUSG00000004934	Pias4	protein inhibitor of activated STAT 4	3
13629	ENSMUSG00000034994	Eef2	eukaryotic translation elongation factor 2	10
100217454	ENSMUSG00000064441	Snord37	small nucleolar RNA, C/D box 37	5
13144	ENSMUSG00000034974	Dapk3	death-associated protein kinase 3	3
70312	ENSMUSG00000034889	Cactin	cactin, spliceosome C complex subunit	2
14672	ENSMUSG00000034781	Gna11	guanine nucleotide binding protein, alpha 11	3
14797	ENSMUSG00000054452	Tle5	TLE family member 5, transcriptional modulator	4
21886	ENSMUSG00000034771	Tle2	transducin-like enhancer of split 2	3
73610	ENSMUSG00000096795	Zfp433	zinc finger protein 433	2
50493	ENSMUSG00000020250	Txnrd1	thioredoxin reductase 1	5
58250	ENSMUSG00000034612	Chst11	carbohydrate sulfotransferase 11	1
216190	ENSMUSG00000020263	Appl2	adaptor protein, phosphotyrosine interaction, PH domain and leucine zipper containing 2	21
22027	ENSMUSG00000020048	Hsp90b1	heat shock protein 90, beta (Grp94), member 1	5
70683	ENSMUSG00000004356	Utp20	UTP20 small subunit processome component	1
237436	ENSMUSG00000074802	Gas2l3	growth arrest-specific 2 like 3	4
20186	ENSMUSG00000047638	Nr1h4	nuclear receptor subfamily 1, group H, member 4	25
75089	ENSMUSG00000019951	Uhrf1bp1l	UHRF1 (ICBP90) binding protein 1-like	2
18674	ENSMUSG00000061904	Slc25a3	solute carrier family 25 (mitochondrial carrier, phosphate carrier), member 3	15
21917	ENSMUSG00000019961	Tmpo	thymopoietin	14
56307	ENSMUSG00000036112	Metap2	methionine aminopeptidase 2	1
215008	ENSMUSG00000036099	Vezt	vezatin, adherens junctions transmembrane protein	2
93765	ENSMUSG00000074781	Ube2n	ubiquitin-conjugating enzyme E2N	4
216238	ENSMUSG00000036499	Eea1	early endosome antigen 1	16
12226	ENSMUSG00000036478	Btg1	BTG anti-proliferation factor 1	10
17022	ENSMUSG00000036446	Lum	lumican	2
67603	ENSMUSG00000019960	Dusp6	dual specificity phosphatase 6	3
17311	ENSMUSG00000019966	Kitl	kit ligand	22
103098	ENSMUSG00000019894	Slc6a15	solute carrier family 6 (neurotransmitter transporter), member 15	64
278279	ENSMUSG00000036019	Tmtc2	transmembrane and tetratricopeptide repeat containing 2	2
17931	ENSMUSG00000019907	Ppp1r12a	protein phosphatase 1, regulatory subunit 12A	10
114774	ENSMUSG00000035873	Pawr	PRKC, apoptosis, WT1, regulator	3
102640148	ENSMUSG00000112532	Gm36283	predicted gene, 36283	3
237542	ENSMUSG00000020189	Osbpl8	oxysterol binding protein-like 8	3
53605	ENSMUSG00000058799	Nap1l1	nucleosome assembly protein 1-like 1	1
382423	ENSMUSG00000074748	Atxn7l3b	ataxin 7-like 3B	2
216345	ENSMUSG00000034163	Zfc3h1	zinc finger, C3H1-type containing	15
100504412	ENSMUSG00000085837	Kcnmb4os2	potassium large conductance calcium-activated channel, subfamily M, beta member 4, opposite strand 2	1
72068	ENSMUSG00000020166	Cnot2	CCR4-NOT transcription complex, subunit 2	2
216363	ENSMUSG00000064181	Rab3ip	RAB3A interacting protein	13
71086	ENSMUSG00000112627	4933412E12Rik	RIKEN cDNA 4933412E12 gene	2
12461	ENSMUSG00000034024	Cct2	chaperonin containing Tcp1, subunit 2 (beta)	1
64050	ENSMUSG00000020171	Yeats4	YEATS domain containing 4	2
17105	ENSMUSG00000069516	Lyz2	lysozyme 2	2
432508	ENSMUSG00000055531	Cpsf6	cleavage and polyadenylation specific factor 6	8
17246	ENSMUSG00000020184	Mdm2	transformed mouse 3T3 cell double minute 2	12
215449	ENSMUSG00000052681	Rap1b	RAS related protein 1b	2
71902	ENSMUSG00000020114	Cand1	cullin associated and neddylation disassociated 1	3
320626	ENSMUSG00000090191	9230105E05Rik	RIKEN cDNA 9230105E05 gene	9
791076	ENSMUSG00000076448	Mir763	microRNA 763	36
15364	ENSMUSG00000056758	Hmga2	high mobility group AT-hook 2	4
75612	ENSMUSG00000034707	Gns	glucosamine (N-acetyl)-6-sulfatase	6
56480	ENSMUSG00000020115	Tbk1	TANK-binding kinase 1	6
73192	ENSMUSG00000034667	Xpot	exportin, tRNA (nuclear export receptor for tRNAs)	1
67074	ENSMUSG00000034602	Mon2	MON2 homolog, regulator of endosome to Golgi trafficking	2
14479	ENSMUSG00000020124	Usp15	ubiquitin specific peptidase 15	2
52468	ENSMUSG00000078429	Ctdsp2	CTD (carboxy-terminal domain, RNA polymerase II, polypeptide A) small phosphatase 2	3
723882	ENSMUSG00000072837	Mir546	microRNA 546	4
216438	ENSMUSG00000040502	Marchf9	membrane associated ring-CH-type finger 9	1
12567	ENSMUSG00000006728	Cdk4	cyclin-dependent kinase 4	7
67125	ENSMUSG00000006736	Tspan31	tetraspanin 31	3
216439	ENSMUSG00000025422	Agap2	ArfGAP with GTPase domain, ankyrin repeat and PH domain 2	9
216440	ENSMUSG00000040462	Os9	amplified in osteosarcoma	2
52666	ENSMUSG00000019467	Arhgef25	Rho guanine nucleotide exchange factor (GEF) 25	2
80904	ENSMUSG00000040415	Dtx3	deltex 3, E3 ubiquitin ligase	4
110962	ENSMUSG00000025409	Mbd6	methyl-CpG binding domain protein 6	7
71750	ENSMUSG00000025404	R3hdm2	R3H domain containing 2	4
20852	ENSMUSG00000002147	Stat6	signal transducer and activator of transcription 6	1
17938	ENSMUSG00000061315	Naca	nascent polypeptide-associated complex alpha polypeptide	2
56351	ENSMUSG00000071072	Ptges3	prostaglandin E synthase 3	5
751518	ENSMUSG00000104755	Mir677	microRNA 677	1
11947	ENSMUSG00000025393	Atp5b	ATP synthase, H+ transporting mitochondrial F1 complex, beta subunit	10
116848	ENSMUSG00000040054	Baz2a	bromodomain adjacent to zinc finger domain, 2A	3
56516	ENSMUSG00000040043	Rbms2	RNA binding motif, single stranded interacting protein 2	5
20847	ENSMUSG00000040033	Stat2	signal transducer and activator of transcription 2	3
210582	ENSMUSG00000039914	Coq10a	coenzyme Q10A	6
17904	ENSMUSG00000090841	Myl6	myosin, light polypeptide 6, alkali, smooth muscle and non-muscle	10
103284	ENSMUSG00000039810	Zc3h10	zinc finger CCCH type containing 10	2
27370	ENSMUSG00000025362	Rps26	ribosomal protein S26	2
211389	ENSMUSG00000049858	Suox	sulfite oxidase	6
78428	ENSMUSG00000064030	Pym1	PYM homolog 1, exon junction complex associated factor	2
74330	ENSMUSG00000025354	Dnajc14	DnaJ heat shock protein family (Hsp40) member C14	3
12512	ENSMUSG00000025351	Cd63	CD63 antigen	3
100043200	ENSMUSG00000094295	Olfr819	olfactory receptor 819	1
623734	ENSMUSG00000092048	Vmn2r85	vomeronasal 2, receptor 85	3
236604	NA	Pisd-ps1	phosphatidylserine decarboxylase, pseudogene 1	12
78887	ENSMUSG00000023764	Sfi1	Sfi1 homolog, spindle assembly associated (yeast)	16
56218	ENSMUSG00000020453	Patz1	POZ (BTB) and AT hook containing zinc finger 1	5
16886	ENSMUSG00000020451	Limk2	LIM motif-containing protein kinase 2	5
114679	ENSMUSG00000075702	Selenom	selenoprotein M	5
29856	ENSMUSG00000020439	Smtn	smoothelin	23
544752	ENSMUSG00000056579	Tug1	taurine upregulated gene 1	9
74522	ENSMUSG00000034543	Morc2a	microrchidia 2A	2
75219	ENSMUSG00000047205	Dusp18	dual specificity phosphatase 18	2
103724	ENSMUSG00000034412	Tbc1d10a	TBC1 domain family, member 10a	3
74302	ENSMUSG00000034354	Mtmr3	myotubularin related protein 3	12
66152	ENSMUSG00000059534	Uqcr10	ubiquinol-cytochrome c reductase, complex III subunit X	3
18016	ENSMUSG00000009073	Nf2	neurofibromin 2	77
18082	ENSMUSG00000034285	Nipsnap1	nipsnap homolog 1	2
11764	ENSMUSG00000009090	Ap1b1	adaptor protein complex AP-1, beta 1 subunit	2
75668	ENSMUSG00000034209	Rasl10a	RAS-like, family 10, member A	3
78926	ENSMUSG00000034201	Gas2l1	growth arrest-specific 2 like 1	3
14030	ENSMUSG00000009079	Ewsr1	Ewing sarcoma breakpoint region 1	26
279766	ENSMUSG00000034175	Rhbdd3	rhomboid domain containing 3	3
22433	ENSMUSG00000020484	Xbp1	X-box binding protein 1	5
104479	ENSMUSG00000020482	Ccdc117	coiled-coil domain containing 117	5
72046	ENSMUSG00000049680	Urgcp	upregulator of cell proliferation	1
56012	ENSMUSG00000020475	Pgam2	phosphoglycerate mutase 2	2
56418	ENSMUSG00000002741	Ykt6	YKT6 v-SNARE homolog (S. cerevisiae)	3
12323	ENSMUSG00000057897	Camk2b	calcium/calmodulin-dependent protein kinase II, beta	6
52915	ENSMUSG00000041164	Zmiz2	zinc finger, MIZ-type containing 2	6
102465759	ENSMUSG00000098516	Mir7651	microRNA 7651	2
268373	ENSMUSG00000071866	Ppia	peptidylprolyl isomerase A	9
19291	ENSMUSG00000094483	Purb	purine rich element binding protein B	9
21379	ENSMUSG00000000384	Tbrg4	transforming growth factor beta regulated gene 4	3
626419	ENSMUSG00000086808	Gm11981	predicted gene 11981	24
319939	ENSMUSG00000020422	Tns3	tensin 3	21
15574	ENSMUSG00000020413	Hus1	HUS1 checkpoint clamp component	6
13649	ENSMUSG00000020122	Egfr	epidermal growth factor receptor	13
19058	ENSMUSG00000033953	Ppp3r1	protein phosphatase 3, regulatory subunit B, alpha isoform (calcineurin B, type I)	7
66713	ENSMUSG00000020152	Actr2	ARP2 actin-related protein 2	7
19324	ENSMUSG00000020149	Rab1a	RAB1A, member RAS oncogene family	2
55963	ENSMUSG00000020142	Slc1a4	solute carrier family 1 (glutamate/neutral amino acid transporter), member 4	4
216549	ENSMUSG00000049659	Aftph	aftiphilin	2
216551	ENSMUSG00000042363	Lgalsl	lectin, galactoside binding-like	27
67245	ENSMUSG00000020134	Peli1	pellino 1	147
108167888	NA	2610024D14Rik	ATP synthase subunit g, mitochondrial pseudogene	27
245944	ENSMUSG00000020128	Vps54	VPS54 GARP complex subunit	9
17449	ENSMUSG00000020321	Mdh1	malate dehydrogenase 1, NAD (soluble)	1
216560	ENSMUSG00000020319	Wdpcp	WD repeat containing planar cell polarity effector	2
18423	ENSMUSG00000005917	Otx1	orthodenticle homeobox 1	2
216565	ENSMUSG00000042302	Ehbp1	EH domain binding protein 1	3
53625	ENSMUSG00000051650	B3gnt2	UDP-GlcNAc:betaGal beta-1,3-N-acetylglucosaminyltransferase 2	23
12464	ENSMUSG00000007739	Cct4	chaperonin containing Tcp1, subunit 4 (delta)	3
17847	ENSMUSG00000056342	Usp34	ubiquitin specific peptidase 34	9
74467	ENSMUSG00000020280	Pus10	pseudouridylate synthase 10	2
69922	ENSMUSG00000064090	Vrk2	vaccinia related kinase 2	4
216616	ENSMUSG00000020467	Efemp1	epidermal growth factor-containing fibulin-like extracellular matrix protein 1	2
104570	ENSMUSG00000020463	Ppp4r3b	protein phosphatase 4 regulatory subunit 3B	8
76784	ENSMUSG00000020459	Mtif2	mitochondrial translational initiation factor 2	4
78294	ENSMUSG00000020460	Rps27a	ribosomal protein S27A	1
68585	ENSMUSG00000020458	Rtn4	reticulon 4	9
20742	ENSMUSG00000020315	Sptbn1	spectrin beta, non-erythrocytic 1	36
103554	ENSMUSG00000040850	Psme4	proteasome (prosome, macropain) activator subunit 4	12
237716	ENSMUSG00000043999	Gpr75	G protein-coupled receptor 75	1
67579	ENSMUSG00000020300	Cpeb4	cytoplasmic polyadenylation element binding protein 4	23
67592	ENSMUSG00000020299	4930524B15Rik	RIKEN cDNA 4930524B15 gene	30
13650	ENSMUSG00000020282	Rhbdf1	rhomboid 5 homolog 1	6
268395	ENSMUSG00000020287	Mpg	N-methylpurine-DNA glycosylase	1
17168	ENSMUSG00000020289	Nprl3	nitrogen permease regulator-like 3	3
103583	ENSMUSG00000020271	Fbxw11	F-box and WD-40 domain protein 11	2
18148	ENSMUSG00000057113	Npm1	nucleophosmin 1	5
70357	ENSMUSG00000053519	Kcnip1	Kv channel-interacting protein 1	3
723824	ENSMUSG00000065553	Mir103-1	microRNA 103-1	7
104458	ENSMUSG00000018848	Rars	arginyl-tRNA synthetase	1
211652	ENSMUSG00000018849	Wwc1	WW, C2 and coiled-coil domain containing 1	37
108645	ENSMUSG00000042032	Mat2b	methionine adenosyltransferase II, beta	2
12450	ENSMUSG00000020326	Ccng1	cyclin G1	13
193116	ENSMUSG00000020409	Slu7	SLU7 splicing factor homolog (S. cerevisiae)	1
70802	ENSMUSG00000044950	Pwwp2a	PWWP domain containing 2A	25
74315	ENSMUSG00000019189	Rnf145	ring finger protein 145	2
216705	ENSMUSG00000006169	Clint1	clathrin interactor 1	10
14694	ENSMUSG00000020372	Rack1	receptor for activated C kinase 1	6
100216534	ENSMUSG00000064725	Snord96a	small nucleolar RNA, C/D box 96A	5
245240	ENSMUSG00000069892	9930111J21Rik2	RIKEN cDNA 9930111J21 gene 2	2
22720	ENSMUSG00000046311	Zfp62	zinc finger protein 62	2
104625	ENSMUSG00000020362	Cnot6	CCR4-NOT transcription complex, subunit 6	6
18412	ENSMUSG00000015837	Sqstm1	sequestosome 1	12
103806	ENSMUSG00000050567	Maml1	mastermind like transcriptional coactivator 1	1
12330	ENSMUSG00000020368	Canx	calnexin	5
59013	ENSMUSG00000007850	Hnrnph1	heterogeneous nuclear ribonucleoprotein H1	28
12750	ENSMUSG00000020385	Clk4	CDC like kinase 4	2
72947	ENSMUSG00000020359	Phykpl	5-phosphohydroxy-L-lysine phospholyase	5
15384	ENSMUSG00000020358	Hnrnpab	heterogeneous nuclear ribonucleoprotein A/B	3
52530	ENSMUSG00000001056	Nhp2	NHP2 ribonucleoprotein	2
76901	ENSMUSG00000020387	Jade2	jade family PHD finger 2	10
52626	ENSMUSG00000020392	Cdkn2aipnl	CDKN2A interacting protein N-terminal like	2
22210	ENSMUSG00000020390	Ube2b	ubiquitin-conjugating enzyme E2B	34
213084	ENSMUSG00000020389	Cdkl3	cyclin-dependent kinase-like 3	1
19052	ENSMUSG00000020349	Ppp2ca	protein phosphatase 2 (formerly 2A), catalytic subunit, alpha isoform	2
21402	ENSMUSG00000036309	Skp1	S-phase kinase-associated protein 1	4
22333	ENSMUSG00000020402	Vdac1	voltage-dependent anion channel 1	7
213673	ENSMUSG00000036275	9530068E07Rik	RIKEN cDNA 9530068E07 gene	4
15525	ENSMUSG00000020361	Hspa4	heat shock protein 4	2
93736	ENSMUSG00000049470	Aff4	AF4/FMR2 family, member 4	26
259301	ENSMUSG00000036216	Leap2	liver-expressed antimicrobial peptide 2	16
22272	ENSMUSG00000044894	Uqcrq	ubiquinol-cytochrome c reductase, complex III subunit VII	3
71774	ENSMUSG00000018387	Shroom1	shroom family member 1	2
20362	ENSMUSG00000018398	Septin8	septin 8	20
622459	ENSMUSG00000081769	Gm12216	predicted gene 12216	5
20520	ENSMUSG00000018900	Slc22a5	solute carrier family 22 (organic cation transporter), member 5	56
18452	ENSMUSG00000018906	P4ha2	procollagen-proline, 2-oxoglutarate 4-dioxygenase (proline 4-hydroxylase), alpha II polypeptide	5
216742	ENSMUSG00000035992	Fnip1	folliculin interacting protein 1	7
192786	ENSMUSG00000037533	Rapgef6	Rap guanine nucleotide exchange factor (GEF) 6	12
72729	ENSMUSG00000052298	Cdc42se2	CDC42 small effector 2	1
14667	ENSMUSG00000000594	Gm2a	GM2 ganglioside activator protein	4
215335	ENSMUSG00000020261	Slc36a1	solute carrier family 36 (proton/amino acid symporter), member 1	2
20692	ENSMUSG00000018593	Sparc	secreted acidic cysteine rich glycoprotein	3
171212	ENSMUSG00000020520	Galnt10	polypeptide N-acetylgalactosaminyltransferase 10	2
78762	ENSMUSG00000085719	4933424L21Rik	RIKEN cDNA 4933424L21 gene	1
76516	ENSMUSG00000087165	2010001A14Rik	RIKEN cDNA 2010001A14 gene	2
73158	ENSMUSG00000037331	Larp1	La ribonucleoprotein domain family, member 1	16
69125	ENSMUSG00000020515	Cnot8	CCR4-NOT transcription complex, subunit 8	1
380698	ENSMUSG00000061462	Obscn	obscurin, cytoskeletal calmodulin and titin-interacting RhoGEF	3
67862	ENSMUSG00000020441	2310033P09Rik	RIKEN cDNA 2310033P09 gene	5
216797	ENSMUSG00000049291	Prss38	protease, serine 38	2
237775	ENSMUSG00000054519	Zfp867	zinc finger protein 867	2
74476	ENSMUSG00000072893	4933439C10Rik	RIKEN cDNA 4933439C10 gene	1
69320	ENSMUSG00000086330	1700007J10Rik	RIKEN cDNA 1700007J10 gene	8
26936	ENSMUSG00000005417	Mprip	myosin phosphatase Rho interacting protein	12
194908	ENSMUSG00000043648	Pld6	phospholipase D family, member 6	6
216805	ENSMUSG00000032633	Flcn	folliculin	5
19377	ENSMUSG00000062115	Rai1	retinoic acid induced 1	15
102465555	ENSMUSG00000098547	Mir6921	microRNA 6921	11
20787	ENSMUSG00000020538	Srebf1	sterol regulatory element binding transcription factor 1	37
216810	ENSMUSG00000000538	Tom1l2	target of myb1-like 2 (chicken)	15
268420	ENSMUSG00000042650	Alkbh5	alkB homolog 5, RNA demethylase	40
16897	ENSMUSG00000020536	Llgl1	LLGL1 scribble cell polarity complex component	10
14248	ENSMUSG00000002812	Flii	flightless I actin binding protein	2
27078	ENSMUSG00000001039	B9d1	B9 protein domain 1	19
13855	ENSMUSG00000001036	Epn2	epsin 2	113
29869	ENSMUSG00000004798	Ulk2	unc-51 like kinase 2	1
56697	ENSMUSG00000047804	Akap10	A kinase (PRKA) anchor protein 10	2
432572	ENSMUSG00000042331	Specc1	sperm antigen with calponin homology and coiled-coil domains 1	3
11541	ENSMUSG00000018500	Adora2b	adenosine A2b receptor	2
20185	ENSMUSG00000018501	Ncor1	nuclear receptor co-repressor 1	29
22187	ENSMUSG00000019505	Ubb	ubiquitin B	5
100217455	ENSMUSG00000065734	Snord49a	small nucleolar RNA, C/D box 49A	1
68626	ENSMUSG00000020549	Elac2	elaC ribonuclease Z 2	2
237806	ENSMUSG00000056752	Dnah9	dynein, axonemal, heavy chain 9	1
77579	ENSMUSG00000020900	Myh10	myosin, heavy polypeptide 10, non-muscle	5
83431	ENSMUSG00000018736	Ndel1	nudE neurodevelopment protein 1 like 1	2
22318	ENSMUSG00000020894	Vamp2	vesicle-associated membrane protein 2	5
18626	ENSMUSG00000020893	Per1	period circadian clock 1	24
216848	ENSMUSG00000018474	Chd3	chromodomain helicase DNA binding protein 3	10
67020	ENSMUSG00000045377	Tmem88	transmembrane protein 88	1
216850	ENSMUSG00000018476	Kdm6b	KDM1 lysine (K)-specific demethylase 6B	3
22059	ENSMUSG00000059552	Trp53	transformation related protein 53	2
12514	ENSMUSG00000018774	Cd68	CD68 antigen	2
13681	ENSMUSG00000059796	Eif4a1	eukaryotic translation initiation factor 4A1	9
80886	ENSMUSG00000005204	Senp3	SUMO/sentrin specific peptidase 3	2
20020	ENSMUSG00000005198	Polr2a	polymerase (RNA) II (DNA directed) polypeptide A	7
75580	ENSMUSG00000018750	Zbtb4	zinc finger and BTB domain containing 4	8
11443	ENSMUSG00000041189	Chrnb1	cholinergic receptor, nicotinic, beta polypeptide 1 (muscle)	2
216856	ENSMUSG00000051790	Nlgn2	neuroligin 2	2
216860	ENSMUSG00000047284	Neurl4	neuralized E3 ubiquitin protein ligase 4	1
56310	ENSMUSG00000023170	Gps2	G protein pathway suppressor 2	4
276770	ENSMUSG00000078812	Eif5a	eukaryotic translation initiation factor 5A	5
78246	ENSMUSG00000018572	Phf23	PHD finger protein 23	3
13543	ENSMUSG00000020888	Dvl2	dishevelled segment polarity protein 2	1
11370	ENSMUSG00000018574	Acadvl	acyl-Coenzyme A dehydrogenase, very long chain	4
75273	ENSMUSG00000018921	Pelp1	proline, glutamic acid and leucine rich protein 1	1
18806	ENSMUSG00000020828	Pld2	phospholipase D2	1
50932	ENSMUSG00000020827	Mink1	misshapen-like kinase 1 (zebrafish)	7
67863	ENSMUSG00000014606	Slc25a11	solute carrier family 25 (mitochondrial carrier oxoglutarate carrier), member 11	2
70510	ENSMUSG00000040746	Rnf167	ring finger protein 167	3
18643	ENSMUSG00000018293	Pfn1	profilin 1	11
16562	ENSMUSG00000020821	Kif1c	kinesin family member 1C	1
102465557	ENSMUSG00000105932	Mir6925	microRNA 6925	8
19069	ENSMUSG00000040667	Nup88	nucleoporin 88	4
216877	ENSMUSG00000040620	Dhx33	DEAH (Asp-Glu-Ala-His) box polypeptide 33	2
18432	ENSMUSG00000040463	Mybbp1a	MYB binding protein (P160) 1a	4
216892	ENSMUSG00000040447	Spns2	spinster homolog 2	17
77577	ENSMUSG00000020798	Spns3	spinster homolog 3	13
67128	ENSMUSG00000020794	Ube2g1	ubiquitin-conjugating enzyme E2G 1	14
11736	ENSMUSG00000020790	Ankfy1	ankyrin repeat and FYVE domain containing 1	3
16407	ENSMUSG00000005947	Itgae	integrin alpha E, epithelial-associated	2
66048	ENSMUSG00000047260	Emc6	ER membrane protein complex subunit 6	2
76281	ENSMUSG00000040158	Tax1bp3	Tax1 (human T cell leukemia virus type I) binding protein 3	3
83429	ENSMUSG00000005949	Ctns	cystinosis, nephropathic	6
74148	ENSMUSG00000020741	Cluh	clustered mitochondria (cluA/CLU1) homolog	8
18472	ENSMUSG00000020745	Pafah1b1	platelet-activating factor acetylhydrolase, isoform 1b, subunit 1	3
17428	ENSMUSG00000000282	Mnt	max binding protein	3
97761	ENSMUSG00000038351	Sgsm2	small G protein signaling modulator 2	2
100217469	NA	Snord91a	small nucleolar RNA, C/D box 91A	1
103677	ENSMUSG00000038290	Smg6	Smg-6 homolog, nonsense mediated mRNA decay factor (C. elegans)	7
380712	ENSMUSG00000038217	Tlcd2	TLC domain containing 2	5
387141	ENSMUSG00000065529	Mir22	microRNA 22	12
192159	ENSMUSG00000020850	Prpf8	pre-mRNA processing factor 8	10
280408	ENSMUSG00000038195	Rilp	Rab interacting lysosomal protein	1
654359	NA	Gm12338	cytochrome c oxidase, subunit VIIc pseudogene	6
19062	ENSMUSG00000006127	Inpp5k	inositol polyphosphate 5-phosphatase K	7
17913	ENSMUSG00000017774	Myo1c	myosin IC	7
12928	ENSMUSG00000017776	Crk	v-crk avian sarcoma virus CT10 oncogene homolog	18
22627	ENSMUSG00000020849	Ywhae	tyrosine 3-monooxygenase/tryptophan 5-monooxygenase activation protein, epsilon polypeptide	11
109934	ENSMUSG00000017631	Abr	active BCR-related gene	14
12874	ENSMUSG00000020841	Cpd	carboxypeptidase D	2
67477	ENSMUSG00000000686	Abhd15	abhydrolase domain containing 15	8
68564	ENSMUSG00000037857	Nufip2	nuclear fragile X mental retardation protein interacting protein 2	11
12957	ENSMUSG00000000724	Cryba1	crystallin, beta A1	6
360013	ENSMUSG00000000631	Myo18a	myosin XVIIIA	62
268448	ENSMUSG00000037791	Phf12	PHD finger protein 12	10
387162	ENSMUSG00000065401	Mir144	microRNA 144	2
22032	ENSMUSG00000017386	Traf4	TNF receptor associated factor 4	5
140859	ENSMUSG00000017405	Nek8	NIMA (never in mitosis gene a)-related expressed kinase 8	1
102465761	ENSMUSG00000099101	Mir7653	microRNA 7653	2
100529076	NA	Snord42a	small nucleolar RNA, C/D box 42A	4
19376	ENSMUSG00000002059	Rab34	RAB34, member RAS oncogene family	2
216974	ENSMUSG00000044122	Proca1	protein interacting with cyclin A1	2
72503	ENSMUSG00000010277	2610507B11Rik	RIKEN cDNA 2610507B11 gene	19
216976	ENSMUSG00000037593	Rskr	ribosomal protein S6 kinase related	2
18099	ENSMUSG00000017376	Nlk	nemo like kinase	4
16706	ENSMUSG00000018334	Ksr1	kinase suppressor of ras 1	4
78889	ENSMUSG00000017677	Wsb1	WD repeat and SOCS box-containing 1	6
104522	ENSMUSG00000091523	AU040972	expressed sequence AU040972	2
52615	ENSMUSG00000017548	Suz12	SUZ12 polycomb repressive complex 2 subunit	2
59040	ENSMUSG00000017686	Rhot1	ras homolog family member T1	1
22680	ENSMUSG00000017421	Zfp207	zinc finger protein 207	35
77417	ENSMUSG00000085078	C030013C21Rik	RIKEN cDNA C030013C21 gene	2
16882	ENSMUSG00000020697	Lig3	ligase III, DNA, ATP-dependent	4
67338	ENSMUSG00000020696	Rffl	ring finger and FYVE like domain containing protein	2
237890	ENSMUSG00000082101	Slfn14	schlafen 14	2
276952	ENSMUSG00000020684	Rasl10b	RAS-like, family 10, member B	4
70439	ENSMUSG00000020680	Taf15	TATA-box binding protein associated factor 15	31
217026	ENSMUSG00000000976	Heatr6	HEAT repeat containing 6	2
21410	ENSMUSG00000020679	Hnf1b	HNF1 homeobox B	12
78394	ENSMUSG00000020677	Ddx52	DExD box helicase 52	2
217030	ENSMUSG00000034940	Synrg	synergin, gamma	3
56321	ENSMUSG00000018697	Aatf	apoptosis antagonizing transcription factor	5
217039	ENSMUSG00000020530	Ggnbp2	gametogenetin binding protein 2	3
237898	ENSMUSG00000000804	Usp32	ubiquitin specific peptidase 32	6
66884	ENSMUSG00000018481	Appbp2	amyloid beta precursor protein (cytoplasmic tail) binding protein 2	3
71489	ENSMUSG00000086199	Bcas3os1	breast carcinoma amplified sequence 3, opposite strand 1	1
327987	ENSMUSG00000034297	Med13	mediator complex subunit 13	16
72508	ENSMUSG00000020516	Rps6kb1	ribosomal protein S6 kinase, polypeptide 1	2
387140	ENSMUSG00000065455	Mir21a	microRNA 21a	12
75909	ENSMUSG00000018171	Vmp1	vacuole membrane protein 1	6
67300	ENSMUSG00000047126	Cltc	clathrin, heavy polypeptide (Hc)	10
67487	ENSMUSG00000018425	Dhx40	DEAH (Asp-Glu-Ala-His) box polypeptide 40	29
77864	ENSMUSG00000018427	Ypel2	yippee like 2	5
83560	ENSMUSG00000010342	Tex14	testis expressed gene 14	8
327992	ENSMUSG00000070345	Hsf5	heat shock transcription factor family member 5	4
68097	ENSMUSG00000020483	Dynll2	dynein light chain LC8-type 2	4
110809	ENSMUSG00000018379	Srsf1	serine and arginine-rich splicing factor 1	19
22344	ENSMUSG00000018377	Vezf1	vascular endothelial zinc finger 1	12
70393	ENSMUSG00000018378	2210416O15Rik	RIKEN cDNA 2210416O15 gene	3
103841	ENSMUSG00000018378	Cuedc1	CUE domain containing 1	29
100628571	ENSMUSG00000092985	Mir378b	microRNA 378b	12
76626	ENSMUSG00000069769	Msi2	musashi RNA-binding protein 2	18
11640	ENSMUSG00000018428	Akap1	A kinase (PRKA) anchor protein 1	16
75285	ENSMUSG00000092399	4930556N13Rik	RIKEN cDNA 4930556N13 gene	2
73921	ENSMUSG00000087338	Scpep1os	serine carboxypeptidase 1, opposite strand	5
74617	ENSMUSG00000000278	Scpep1	serine carboxypeptidase 1	1
217109	ENSMUSG00000054079	Utp18	UTP18 small subunit processome component	2
103537	ENSMUSG00000059474	Mbtd1	mbt domain containing 1	3
18103	ENSMUSG00000020857	Nme2	NME/NM23 nucleoside diphosphate kinase 2	2
70834	ENSMUSG00000020859	Spag9	sperm associated antigen 9	3
22057	ENSMUSG00000037573	Tob1	transducer of ErbB-2.1	1
67684	ENSMUSG00000020863	Luc7l3	LUC7-like 3 (S. cerevisiae)	18
71452	ENSMUSG00000020864	Ankrd40	ankyrin repeat domain 40	4
76408	ENSMUSG00000020865	Abcc3	ATP-binding cassette, sub-family C (CFTR/MRP), member 3	11
217116	ENSMUSG00000020867	Spata20	spermatogenesis associated 20	8
268465	ENSMUSG00000039055	Eme1	essential meiotic structure-specific endonuclease 1	4
217124	ENSMUSG00000038976	Ppp1r9b	protein phosphatase 1, regulatory subunit 9B	4
217125	ENSMUSG00000047181	Samd14	sterile alpha motif domain containing 14	2
18604	ENSMUSG00000038967	Pdk2	pyruvate dehydrogenase kinase, isoenzyme 2	6
16400	ENSMUSG00000001507	Itga3	integrin alpha 3	62
13393	ENSMUSG00000001510	Dlx3	distal-less homeobox 3	4
217127	ENSMUSG00000038909	Kat7	K(lysine) acetyltransferase 7	3
20747	ENSMUSG00000057522	Spop	speckle-type BTB/POZ protein	4
268469	ENSMUSG00000075595	Zfp652	zinc finger protein 652	4
100526468	ENSMUSG00000093358	Mir3063	microRNA 3063	6
12412	ENSMUSG00000018666	Cbx1	chromobox 1	2
18023	ENSMUSG00000038615	Nfe2l1	nuclear factor, erythroid derived 2,-like 1	15
16211	ENSMUSG00000001440	Kpnb1	karyopherin (importin) beta 1	10
19155	ENSMUSG00000001441	Npepps	aminopeptidase puromycin sensitive	36
67036	ENSMUSG00000018882	Mrpl45	mitochondrial ribosomal protein L45	3
58996	ENSMUSG00000049807	Arhgap23	Rho GTPase activating protein 23	3
246198	ENSMUSG00000038437	Mllt6	myeloid/lymphoid or mixed-lineage leukemia; translocated to, 6	6
102465559	ENSMUSG00000098881	Mir6927	microRNA 6927	9
217149	ENSMUSG00000078695	Cisd3	CDGSH iron sulfur domain 3	8
65019	ENSMUSG00000071415	Rpl23	ribosomal protein L23	1
16796	ENSMUSG00000038366	Lasp1	LIM and SH3 protein 1	9
68127	NA	B230217C12Rik	RIKEN cDNA B230217C12 gene	4
19921	ENSMUSG00000017404	Rpl19	ribosomal protein L19	4
72194	ENSMUSG00000020883	Fbxl20	F-box and leucine-rich repeat protein 20	13
19014	ENSMUSG00000018160	Med1	mediator complex subunit 1	12
69131	ENSMUSG00000003119	Cdk12	cyclin-dependent kinase 12	11
100628613	ENSMUSG00000093176	Mir5119	microRNA 5119	2
14786	ENSMUSG00000019312	Grb7	growth factor receptor bound protein 7	6
22123	ENSMUSG00000017221	Psmd3	proteasome (prosome, macropain) 26S subunit, non-ATPase, 3	3
74026	ENSMUSG00000052915	Msl1	male specific lethal 1	5
192160	ENSMUSG00000078676	Casc3	cancer susceptibility candidate 3	3
23834	ENSMUSG00000017499	Cdc6	cell division cycle 6	1
16010	ENSMUSG00000017493	Igfbp4	insulin-like growth factor binding protein 4	10
57376	ENSMUSG00000037935	Smarce1	SWI/SNF related, matrix associated, actin dependent regulator of chromatin, subfamily e, member 1	1
268482	ENSMUSG00000020912	Krt12	keratin 12	2
66809	ENSMUSG00000035775	Krt20	keratin 20	12
16669	ENSMUSG00000020911	Krt19	keratin 19	11
20918	ENSMUSG00000035530	Eif1	eukaryotic translation initiation factor 1	5
16480	ENSMUSG00000001552	Jup	junction plakoglobin	12
102465671	ENSMUSG00000104854	Mir7116	microRNA 7116	2
75482	ENSMUSG00000017832	Hspb9	heat shock protein, alpha-crystallin-related, B9	4
20848	ENSMUSG00000004040	Stat3	signal transducer and activator of transcription 3	5
19285	ENSMUSG00000004044	Cavin1	caveolae associated 1	14
11975	ENSMUSG00000019302	Atp6v0a1	ATPase, H+ transporting, lysosomal V0 subunit A1	8
27419	ENSMUSG00000001751	Naglu	alpha-N-acetylglucosaminidase (Sanfilippo disease IIIB)	4
19183	ENSMUSG00000019303	Psmc3ip	proteasome (prosome, macropain) 26S subunit, ATPase 3, interacting protein	3
52469	ENSMUSG00000017188	Coa3	cytochrome C oxidase assembly factor 3	2
56208	ENSMUSG00000035086	Becn1	beclin 1, autophagy related	3
19192	ENSMUSG00000078652	Psme3	proteaseome (prosome, macropain) activator subunit 3 (PA28 gamma, Ki)	2
19942	ENSMUSG00000063316	Rpl27	ribosomal protein L27	3
70110	ENSMUSG00000010358	Ifi35	interferon-induced protein 35	1
17966	ENSMUSG00000017119	Nbr1	NBR1, autophagy cargo receptor	6
667306	ENSMUSG00000085486	Gm11634	predicted gene 11634	2
66599	ENSMUSG00000010362	Rdm1	RAD52 motif 1	6
80981	ENSMUSG00000034936	Arl4d	ADP-ribosylation factor-like 4D	11
21429	ENSMUSG00000020923	Ubtf	upstream binding transcription factor, RNA polymerase I	4
68066	ENSMUSG00000018677	Slc25a39	solute carrier family 25, member 39	5
14824	ENSMUSG00000034708	Grn	granulin	5
16399	ENSMUSG00000034664	Itga2b	integrin alpha 2b	8
237943	ENSMUSG00000034621	Gpatch8	G patch domain containing 8	19
72469	ENSMUSG00000020937	Plcd3	phospholipase C, delta 3	47
67131	ENSMUSG00000056938	Acbd4	acyl-Coenzyme A binding domain containing 4	2
192231	ENSMUSG00000048878	Hexim1	hexamethylene bis-acetamide inducible 1	2
71059	ENSMUSG00000043372	Hexim2	hexamethylene bis-acetamide inducible 2	5
544817	ENSMUSG00000034255	Arhgap27	Rho GTPase activating protein 27	2
56494	ENSMUSG00000020946	Gosr2	golgi SNAP receptor complex member 2	2
76719	ENSMUSG00000018412	Kansl1	KAT8 regulatory NSL complex subunit 1	12
217232	ENSMUSG00000020687	Cdc27	cell division cycle 27	1
24086	ENSMUSG00000020694	Tlk2	tousled-like kinase 2 (Arabidopsis)	8
26406	ENSMUSG00000020700	Map3k3	mitogen-activated protein kinase kinase kinase 3	5
72047	ENSMUSG00000020705	Ddx42	DEAD box helicase 42	4
56095	ENSMUSG00000020706	Ftsj3	FtsJ RNA methyltransferase homolog 3 (E. coli)	1
50776	ENSMUSG00000020718	Polg2	polymerase (DNA directed), gamma 2, accessory subunit	2
100526469	ENSMUSG00000093273	Mir3064	microRNA 3064	6
13207	ENSMUSG00000020719	Ddx5	DEAD box helicase 5	17
207165	ENSMUSG00000040481	Bptf	bromodomain PHD finger transcription factor	16
66997	ENSMUSG00000020720	Psmd12	proteasome (prosome, macropain) 26S subunit, non-ATPase, 12	1
140723	ENSMUSG00000040373	Cacng5	calcium channel, voltage-dependent, gamma subunit 5	1
18750	ENSMUSG00000050965	Prkca	protein kinase C, alpha	10
11818	ENSMUSG00000000049	Apoh	apolipoprotein H	10
12006	ENSMUSG00000000142	Axin2	axin 2	2
13929	ENSMUSG00000020610	Amz2	archaelysin family metallopeptidase 2	2
19084	ENSMUSG00000020612	Prkar1a	protein kinase, cAMP dependent regulatory, type I, alpha	10
16834	ENSMUSG00000018661	Cog1	component of oligomeric golgi complex 1	2
70355	ENSMUSG00000051043	Gprc5c	G protein-coupled receptor, family C, group 5, member C	7
26941	ENSMUSG00000020733	Slc9a3r1	solute carrier family 9 (sodium/hydrogen exchanger), member 3 regulator 1	2
68572	ENSMUSG00000018858	Mrpl58	mitochondrial ribosomal protein L58	1
50773	ENSMUSG00000020736	Nt5c	5',3'-nucleotidase, cytosolic	2
102634812	NA	Gm11694	ribosomal protein L39 pseudogene	2
15374	ENSMUSG00000020737	Jpt1	Jupiter microtubule associated homolog 1	2
50529	ENSMUSG00000046756	Mrps7	mitchondrial ribosomal protein S7	2
69674	ENSMUSG00000020743	Mif4gd	MIF4G domain containing	1
71947	ENSMUSG00000020747	Tmem94	transmembrane protein 94	3
100885833	ENSMUSG00000093539	Mir5621	microRNA 5621	1
140721	ENSMUSG00000034471	Caskin2	CASK-interacting protein 2	1
217325	ENSMUSG00000020782	Llgl2	LLGL2 scribble cell polarity complex component	14
170472	ENSMUSG00000020752	Recql5	RecQ protein-like 5	1
15081	ENSMUSG00000016559	H3f3b	H3.3 histone B	8
70450	ENSMUSG00000057948	Unc13d	unc-13 homolog D	4
22378	ENSMUSG00000034341	Wbp2	WW domain binding protein 2	1
217335	ENSMUSG00000020776	Fbf1	Fas (TNFRSF6) binding factor 1	6
11430	ENSMUSG00000020777	Acox1	acyl-Coenzyme A oxidase 1, palmitoyl	12
14027	ENSMUSG00000034282	Evpl	envoplakin	1
217337	ENSMUSG00000020780	Srp68	signal recognition particle 68	3
217342	ENSMUSG00000020802	Ube2o	ubiquitin-conjugating enzyme E2O	3
107817	ENSMUSG00000056962	Jmjd6	jumonji domain containing 6	2
74319	ENSMUSG00000090266	Mettl23	methyltransferase like 23	3
20382	ENSMUSG00000034120	Srsf2	serine and arginine-rich splicing factor 2	7
69900	ENSMUSG00000020818	Mfsd11	major facilitator superfamily domain containing 11	2
102465258	ENSMUSG00000104740	Mir6516	microRNA 6516	4
74136	ENSMUSG00000020823	Sec14l1	SEC14-like lipid binding 1	3
53860	ENSMUSG00000059248	Septin9	septin 9	4
217351	ENSMUSG00000025571	Tnrc6c	trinucleotide repeat containing 6C	18
20973	ENSMUSG00000048277	Syngr2	synaptogyrin 2	4
21877	ENSMUSG00000025574	Tk1	thymidine kinase 1	3
102466768	ENSMUSG00000098958	Mir6933	microRNA 6933	3
74451	ENSMUSG00000017715	Pgs1	phosphatidylglycerophosphate synthase 1	2
72344	ENSMUSG00000033909	Usp36	ubiquitin specific peptidase 36	18
58251	ENSMUSG00000076433	Cep295nl	CEP295 N-terminal like	4
21858	ENSMUSG00000017466	Timp2	tissue inhibitor of metalloproteinase 2	4
102465563	ENSMUSG00000098704	Mir6934	microRNA 6934	12
207592	ENSMUSG00000039976	Tbc1d16	TBC1 domain family, member 16	3
672511	ENSMUSG00000070327	Rnf213	ring finger protein 213	5
78439	ENSMUSG00000109408	A930037H05Rik	RIKEN cDNA A930037H05 gene	2
108100	ENSMUSG00000025372	Baiap2	brain-specific angiogenesis inhibitor 1-associated protein 2	20
11302	ENSMUSG00000025375	Aatk	apoptosis-associated tyrosine kinase	3
100042332	NA	2810410L24Rik	RIKEN cDNA 2810410L24 gene	2
102640779	NA	2900052L18Rik	RIKEN cDNA 2900052L18 gene	3
11465	ENSMUSG00000062825	Actg1	actin, gamma, cytoplasmic 1	7
102465564	ENSMUSG00000098955	Mir6935	microRNA 6935	2
217365	ENSMUSG00000039703	Nploc4	NPL4 homolog, ubiquitin recognition factor	4
15239	ENSMUSG00000025793	Hgs	HGF-regulated tyrosine kinase substrate	1
68701	ENSMUSG00000025129	Ppp1r27	protein phosphatase 1, regulatory subunit 27	7
[truncated: 4,168 more rows]

## Sheet: 611 AS and binding targets
Gene symbol	Name	PeakNum	Dominant AS type
[truncated: 611 more rows]
