# Supplementary material for: Spliceosome component Usp39 contributes to hepatic lipid homeostasis through the regulation of lipophagy
Source: Research Square preprint supplement (doi:10.21203/rs.3.rs-2182223/v1), 2023-03-02
Supplement: Supplementary file 6 [file bce7fc945e5abdfe19646a16.docx]

**Table S5 Sequence information**

| **Genotype-PCR primers** | | | | |
| --- | --- | --- | --- | --- |
| Name | Forward primer 5'-3' | | Reverse primer 5'-3' | |
| Usp39 | CATCTCACTTGCCTGGATTCC | | CTCCAGCATCATAAATGGAGGAC | |
| Cre | CCCGCAGAACCTGAAGATG | | GACCCGGCAAAACAGGTAG | |
| **RT-PCR primers** | | | | |
| Name | Forward primer 5'-3' | | Reverse primer 5'-3' | |
| Usp39 | GTCACTGCCCGTACTTGGATA | | GTATGCGTTGATGTGCGAGAG | |
| Ki67 | AACGGGGTTACTATAGATGAGCCTG | | CTGGAAATTCTGTTGGCTTGCTTC | |
| Pcna | TTGCACGTATATGCCGAGACC | | GGTGAACAGGCTCATTCATCTCT | |
| Alb | GAAGTGGGTAACCTTTCTCC | | ACAGCAGTCAGCCAGTTCACC | |
| H19 | CAACATCCCACCCACCGTAA | | GCTCACCAAGAAGGCTGGAT | |
| Afp | CTTCCCTCATCCTCCTGCTAC | | ACAAACTGGGTAAAGGTGATGG | |
| Collagen1a1 | TCACCTACAGCACCCTTGTG | | GGTGGAGGGAGTTTACACGA | |
| α-Sma | GGAGAAGCCCAGCCAGTCGC | | AGCCGGCCTTACAGAGCCCA | |
| Tgfb1 | TTGCTTCAGCTCCACAGAGA | | TGGTTGTAGAGGGCAAGGAC | |
| Tnf-α | CATCTTCTCAAAATTCGAGTGACAA | | TGGGAGTAGACAAGGTACAACCC | |
| Ulk1 | ACCATTGTCTACCAGTGT | | AGTGTCTTGTTCTTCTCATAA | |
| Atg3 | TCACAACACAGGTATTACAG | | CTTCCTCGTCTTCTTCATC | |
| Atg5 | TGTGCTTCGAGATGTGTGGTT | | ACCAACGTCAAATAGCTGACTC | |
| Atg7 | CAGAAGAAGTTGAACGAGTA | | CAGAGTCACCATTGTAGTAAT | |
| Srebp1C | GGAGCCATGGATTGCACATT | | GGAAGTCACTGTCTTGGTTGTTGA | |
| Srebp2 | CCGCTCTCGAATCCTCTTAT | | CAGCACCTGACTCCAGTGAC | |
| Chrebpα | CGACACTCACCCACCTCTTC | | TTGTTCAGCCGGATCTTGTC | |
| Chrebpβ | TCTGCAGATCGCGYGGAG | | CTTGTCCCGGCATAGCAAC | |
| Acc1 | TGAATCTCACGCGCCTACTATG | | ATGACCCTGTTGCCTCCAAAC | |
| Scd1 | TTCTTGCGATACACTCTGGTGC | | CGGGATTGAATGTTCTTGTCGT | |
| Elovl6 | TGCCATGTTCATCACCTTGT | | TGCTGCATCCAGTTGAAGAC | |
| Fasn | AAGTTGCCCGAGTCAGAGAA | | CGTCGAACTTGGAGAGATCC | |
| Pklr | GAACATTGCACGACTCAACTTC | | CAGTGCGTATCTCGGGACC | |
| Atgl | CCAACGCCACTCACATCTAC | | GCCTCCTTGGACACCTCAAT | |
| Hsl | ACGCTACACAAAGGCTGCTT | | TCTCGTTGCGTTTGTAGTGC | |
| Lpl | TGGCCCATAGCAGGTCT | | AAGGCCAGGTGTTTCAATC | |
| Lipa | GAACACTCGGTCCTGACAGGAGAT | | AAGCCGTGCTGAAGATACACAACT | |
| Cpt1α | ATCGTGGTGGTGGGTGTGATAT | | ACGCCACTCACGATGTTCTTC | |
| Gapdh | AGGTCGGTGTGAACGGATTTG | | TGTAGACCATGTAGTTGAGGTCA | |
| Actb | GTGACGTTGACATCCGTAAAGA | | GCCGGACTCATCGTACTCC | |
| Hsf1-qPCR | GGGAAACAGGAGTGTATGGACT | | CTTGTTGACAACTTTTTGCTGCT | |
| Hsf1-NMD | CTCACTGGTGCAGTCGAACC | | GGACAGTGTAGACATTCCCAGA | |
| Hsf1-FL | TGACAGCAACTCAGCACACTC | | TGCTCCAGGGAGTACTGTCG | |
| **RIP-PCR primers** | | | | |
| Name | Forward primer 5'-3' | | Reverse primer 5'-3' | |
| RIP-PCR- Hsf1-E5-E6 | CCAGCAGCAAAAAGTTGTCA | | CTGCACCAGTGAGATCAGGA | |
| RIP-PCR- Hsf1-E6-E7 | ATCCTGGGGGTGAAGAGAAA | | GGCACAGAGTGTGCTGAGTT | |
| RIP-PCR- Hsf1-E7 | TGAGTGACAGCAACTCAGCA | | TGCTCCAGGGAGTACTGTCG | |
| RIP-PCR-Hsf1-E7-E8 | TGAGTGACAGCAACTCAGCA | | TGAGTGACAGCAACTCAGCA | |
| RIP-PCR-U6 snRNA | CGCTTCGGCAGCACATATAC | | TTCACGAATTTGCGTGTCAT | |
| RIP-PCR-Ptbp1-E4 | GTCCCTTCCAGAGTCATCCA | | CATCTCAATGAAGGCCTGGT | |
| **Semiquantitative RT-PCR primers** | | | | |
| Name | Forward primer 5'-3' | | Reverse primer 5'-3' | |
| Ulk3 | AATCAGGCCCTGCTAAGACA | | GGAGGCGTGGTTTGTCAC | |
| Nrbp2 | AGCCTCAAGCAGTTCCTCAA | | GTGCAGACAGGATCTGCGTA | |
| Hsf1-Sei-FL | TGAGAAAGATCCCTCTGATGTTG | | CGACCATACTTGGGCACAG | |
| Hsf1-Sei-NMD | TCTCACTGGTGCAGTCGAAC | | GCCCAGGATATACAGCAAGC | |
| Trp53inp1 | TCTCAGTGAGGCGAGTTGTG | | CGACGGAGACCATTTCTGTT | |
| Tcirg1 | GTGGCAGCTGACCATACTGA | | CTTGTAGGGCTCCACAGCA | |
| **RNA-p­ull down Primers** | | | | |
| Name | Forward primer 5'-3' | | Reverse primer 5'-3' | |
| Hsf1-E5-I7 | TAATACGACTCACTATAGGGGAGAACGAGGCCCTGTGG | | TGGGAGCCAGCTCAGTGATA | |
| **Primers for plasmid construction** | | | | |
| Name | Forward primer 5'-3' | | Reverse primer 5'-3' | |
| Usp39-pT3G-3FPS | ACGAAGGGCGGAGGAGGATCCATGTCTAGCCGGTCCAAGCG | | CCGTCATAGCGCGTTAATTAATCAAGCCCCCTGCTGGTT | |
| Hsf1-pLenti- C-Myc-DDK-IRES-Puro | AGGAGATCTGCCGCCGCGATCGCATGGATCTGGCCGTGGGC | | CTCGAGCGGCCGCGTacgcgtGGAGACAGTGGGGTCCTTGG | |
| **siRNA sequence** | | | | |
| Name | Sequence (5′ - 3′) | | | Manufacturer |
| siNC | UUCUCCGAACGUGUCACGUTT | | | Guangzhou RiboBio Co., Ltd. |
| siUpf1#1 | GAUGCAGUUCCGCUCCAUU | | | Guangzhou RiboBio Co., Ltd. |
| siUpf1#2 | AGAGCGCATTGAAAACGTT | | | Guangzhou RiboBio Co., Ltd. |
| siUSP39#1 | GCATCAAGAGATTTACTAA | | | Guangzhou RiboBio Co., Ltd. |
| siUsp39#2 | CAAGTGGTATGAATTACAA | | | Guangzhou RiboBio Co., Ltd. |
| siHsf1 #1 | CCTGAAGAGTGAGGACATA | | | Guangzhou RiboBio Co., Ltd. |
| siHsf1 #2 | GGACACAACCGGAGCCCAA | | | Guangzhou RiboBio Co., Ltd. |
| **shRNA targeting sequence** | | | | |
| Name | | Sequence (5′ - 3′) | | Manufacturer |
| PLKO.1-shUsp39#2 | | TRCCCTGACAACTATGAAATCATT | | Jinan WZ Biosciences INC |
| PLKO.1-shUsp39#4 | | CCCGCTCTATAAGGATGAGAA | | Jinan WZ Biosciences INC |

**Note**: Primer sequences are all produced by Sangon Biotech (Shanghai) Co., Ltd., unless the manufacturer is specifically indicated in the table.
