# Supplementary material for: Spliceosome component Usp39 contributes to hepatic lipid homeostasis through the regulation of lipophagy
Source: Research Square preprint supplement (doi:10.21203/rs.3.rs-2182223/v1), 2023-03-02
Supplement: Supplementary file 7 [file c3bc6f516220e184805acae7.xlsx]

## Sheet: Table S1 Gene expression profil
GeneID	Length	A468_NC_counts	A469_HKO_counts	A470_HKO_counts	A471_HKO_counts	A472_NC_counts	A473_NC_counts	A474_HKO_counts	A475_NC_counts	SYMBOL	A468_NC_FPKM	A469_HKO_FPKM	A470_HKO_FPKM	A471_HKO_FPKM	A472_NC_FPKM	A473_NC_FPKM	A474_HKO_FPKM	A475_NC_FPKM	baseMean	log2FoldChange	lfcSE	stat	pvalue	padj	change
ENSMUSG00000000001	3262	912	867	1088	1116	723	731	1202	864	Gnai3	30.4505	27.3483	32.7157	35.8562	22.359	26.0891	38.8701	25.423	922	0.113622	0.131417	0.86459	0.387264	0.598793	NOT
ENSMUSG00000000003	902	0	0	0	0	0	0	0	0	Pbsn	0	0	0	0	0	0	0	0	0	NA	NA	NA	NA	NA	NA
ENSMUSG00000000028	3506	11	27	23	26	12	14	42	14	Cdc45	0.341715	0.792405	0.643469	0.777223	0.345277	0.464881	1.26367	0.383277	20.1948	0.919508	0.364402	2.52333	0.0116249	0.0516095	UP
ENSMUSG00000000031	2460	15	1685	2259	764	135	23	19477	61	H19	0.664109	70.4791	90.0726	32.5494	5.53601	1.08847	835.184	2.38008	2596.95	6.37415	1.09276	5.83306	5.44e-09	2.81e-07	UP
ENSMUSG00000000037	6397	1	3	2	3	1	0	7	2	Scml2	0.0170258	0.0482548	0.0306666	0.0491506	0.0157696	0	0.11543	0.0300089	2.18058	1.63672	1.12065	1.46051	0.144149	NA	NOT
ENSMUSG00000000049	1594	12470	13058	10006	9763	14114	13172	9143	15467	Apoh	852.042	842.915	615.721	641.918	893.223	962.03	605.056	931.354	12311.3	-0.664281	0.154728	-4.29321	1.76e-05	0.000273603	DOWN
ENSMUSG00000000056	4806	544	623	579	565	667	602	612	675	Narf	12.3282	13.3383	11.817	12.3211	14.0004	14.5827	13.4327	13.4808	608.475	-0.343656	0.116069	-2.96078	0.00306857	0.0180422	NOT
ENSMUSG00000000058	3335	87	92	158	111	62	56	144	74	Cav2	2.84123	2.83849	4.647	3.48828	1.8754	1.95487	4.55472	2.12977	94.4715	0.562199	0.214488	2.62112	0.00876403	0.041639	UP
ENSMUSG00000000078	4391	190	502	595	769	176	134	843	237	Klf6	4.71274	11.7635	13.2912	18.3547	4.04341	3.55277	20.2516	5.18062	403.173	1.60204	0.180935	8.85421	8.43e-19	5.07e-16	UP
ENSMUSG00000000085	7731	179	213	233	240	172	169	252	224	Scmh1	2.52174	2.83491	2.95619	3.25357	2.24435	2.54493	3.43843	2.78105	206.939	0.0546816	0.134796	0.405663	0.68499	0.826863	NOT
ENSMUSG00000000088	2101	857	1142	1133	1033	912	820	1206	1016	Cox5a	44.4261	55.9288	52.8951	51.5298	43.7892	45.4374	60.5503	46.4157	1000.13	0.0446596	0.0935458	0.477409	0.633071	0.791448	NOT
ENSMUSG00000000093	3626	89	217	146	156	151	94	254	97	Tbx2	2.67328	6.15783	3.94945	4.50901	4.20095	3.01804	7.38926	2.56768	145.703	0.561403	0.231713	2.42284	0.0153997	0.0639863	UP
ENSMUSG00000000094	3401	1	1	0	0	0	0	1	0	Tbx4	0.0320241	0.0302544	0	0	0	0	0.0310162	0	0.367498	0.428923	2.59815	0.165088	0.868875	NA	NOT
ENSMUSG00000000103	3107	0	0	0	0	0	0	0	0	Zfy2	0	0	0	0	0	0	0	0	0	NA	NA	NA	NA	NA	NA
ENSMUSG00000000120	3446	62	46	81	86	53	66	98	86	Ngfr	1.95956	1.37353	2.30559	2.61558	1.55152	2.22974	2.99989	2.39541	71.1099	-0.0705417	0.245382	-0.287478	0.773747	0.88062	NOT
ENSMUSG00000000125	3076	0	0	0	0	0	0	0	0	Wnt3	0	0	0	0	0	0	0	0	0	NA	NA	NA	NA	NA	NA
ENSMUSG00000000126	3329	11	16	12	14	12	4	15	9	Wnt9a	0.359883	0.49454	0.353573	0.440756	0.363635	0.139885	0.475305	0.259493	11.3058	0.394483	0.465696	0.847082	0.396949	0.607856	NOT
ENSMUSG00000000127	4680	141	81	136	103	100	114	150	148	Fer	3.28138	1.78088	2.85039	2.30662	2.15552	2.83586	3.38096	3.03538	121.096	-0.394247	0.205675	-1.91684	0.0552576	0.163848	NOT
ENSMUSG00000000131	16920	777	811	846	695	662	646	850	802	Xpo6	5.00154	4.93192	4.90435	4.30496	3.9469	4.44485	5.29924	4.54958	754.989	-0.134294	0.117322	-1.14465	0.252352	0.459281	NOT
ENSMUSG00000000134	9261	331	375	557	499	383	310	521	387	Tfe3	3.89272	4.16648	5.89941	5.64712	4.17195	3.89699	5.93438	4.01098	411.069	0.18369	0.128176	1.4331	0.15183	0.330415	NOT
ENSMUSG00000000142	5506	117	187	233	198	185	124	247	144	Axin2	2.31437	3.49463	4.1508	3.76889	3.38948	2.62187	4.73212	2.51029	174.511	0.318331	0.163092	1.95185	0.050956	0.154824	NOT
ENSMUSG00000000148	6179	149	161	205	201	152	146	170	188	Brat1	2.62634	2.68104	3.25422	3.40928	2.48155	2.75081	2.90219	2.92036	169.648	-0.0629811	0.154377	-0.40797	0.683296	0.825508	NOT
ENSMUSG00000000149	3416	1619	2172	2068	2055	1845	1734	1926	2311	Gna12	51.6193	65.4241	59.3806	63.049	54.485	59.0958	59.4749	64.935	1951.27	-0.138953	0.122487	-1.13443	0.256615	0.464485	NOT
ENSMUSG00000000154	1699	745	674	702	657	729	629	536	859	Slc22a18	47.758	40.819	40.528	40.5281	43.2845	43.1005	33.2787	48.5285	694.333	-0.475432	0.139102	-3.41786	0.000631166	0.00520272	NOT
ENSMUSG00000000157	4324	75	57	77	52	88	49	52	46	Itgb2l	1.88912	1.35639	1.74669	1.26038	2.05303	1.31928	1.26857	1.0211	62.1672	-0.403243	0.270995	-1.48801	0.136749	0.308756	NOT
ENSMUSG00000000159	2523	184	202	232	207	183	135	223	158	Igsf5	7.94298	8.23815	9.0195	8.59879	7.31698	6.22934	9.32358	6.01086	187.453	0.104825	0.148991	0.703564	0.481705	0.678486	NOT
ENSMUSG00000000167	2813	9	5	3	6	6	9	4	4	Pih1d2	0.348462	0.182892	0.104608	0.223545	0.215169	0.372476	0.149998	0.136486	5.99247	-0.935148	0.648527	-1.44196	0.149315	0.32629	NOT
ENSMUSG00000000168	4886	549	636	627	583	661	520	778	553	Dlat	12.2378	13.3937	12.5871	12.5055	13.6473	12.3901	16.7966	10.8635	607.038	-0.0863093	0.124497	-0.693264	0.488144	0.682867	NOT
ENSMUSG00000000171	1231	2020	2412	2239	2622	2619	1857	2644	2029	Sdhd	178.721	201.611	178.405	223.233	214.623	175.622	226.568	158.205	2283.57	-0.0605505	0.131927	-0.458971	0.646255	0.799848	NOT
ENSMUSG00000000182	1814	0	0	0	0	0	0	1	0	Fgf23	0	0	0	0	0	0	0.0581511	0	0.104124	0.43757	3.53381	0.123824	0.901455	NA	NOT
ENSMUSG00000000183	4657	0	0	0	0	0	0	0	0	Fgf6	0	0	0	0	0	0	0	0	0	NA	NA	NA	NA	NA	NA
ENSMUSG00000000184	9409	93	92	199	166	106	65	230	98	Ccnd2	1.07652	1.0061	2.07454	1.84905	1.13648	0.804258	2.57857	0.999723	125.302	0.631311	0.238904	2.64253	0.00822903	0.039622	UP
ENSMUSG00000000194	12766	345	356	439	368	381	322	424	362	Gpr107	2.94339	2.8694	3.37304	3.02118	3.01071	2.93647	3.50353	2.72176	370.998	-0.115454	0.112446	-1.02675	0.304538	0.51736	NOT
ENSMUSG00000000197	14715	0	0	0	3	1	0	2	0	Nalcn	0	0	0	0.0213671	0.00685548	0	0.0143372	0	0.693088	1.75646	2.15467	0.815188	0.414964	NA	NOT
ENSMUSG00000000202	3187	0	0	0	0	0	0	0	0	Btbd17	0	0	0	0	0	0	0	0	0	NA	NA	NA	NA	NA	NA
ENSMUSG00000000204	3964	7	21	14	7	14	7	19	15	Slfn4	0.19233	0.545106	0.346422	0.185075	0.356281	0.205584	0.505609	0.363207	12.6091	0.241139	0.479638	0.502752	0.615139	0.780299	NOT
ENSMUSG00000000214	2364	0	0	0	0	0	0	0	0	Th	0	0	0	0	0	0	0	0	0	NA	NA	NA	NA	NA	NA
ENSMUSG00000000215	1312	0	0	0	0	0	0	0	1	Ins2	0	0	0	0	0	0	0	0.0731582	0.122645	-1.0051	3.53381	-0.284424	0.776085	NA	NOT
ENSMUSG00000000216	2991	0	1	0	1	0	0	2	0	Scnn1g	0	0.0344016	0	0.0350403	0	0	0.0705357	0	0.447004	2.15019	2.37452	0.905524	0.365188	NA	NOT
ENSMUSG00000000223	8553	1	2	5	2	0	0	2	0	Drp2	0.012734	0.0240606	0.0573407	0.0245073	0	0	0.0246665	0	1.36841	2.88652	1.49057	1.93653	0.0528033	NA	NOT
ENSMUSG00000000244	6234	12	8	13	6	9	7	15	15	Tspan32	0.209651	0.132044	0.204545	0.100872	0.145638	0.130724	0.253816	0.230952	10.4464	-0.319617	0.485149	-0.658803	0.510022	0.701431	NOT
ENSMUSG00000000247	4393	55	119	142	136	89	56	159	80	Lhx2	1.36359	2.78728	3.17058	3.24461	2.04375	1.48406	3.81796	1.74794	100.252	0.712341	0.186039	3.82898	0.000128673	0.00143077	UP
ENSMUSG00000000248	2847	3	2	1	2	0	0	2	0	Clec2g	0.114767	0.0722833	0.0344528	0.0736253	0	0	0.0741033	0	1.22082	0.9183	1.52467	0.602293	0.546979	NA	NOT
ENSMUSG00000000253	2323	22	24	33	26	35	21	32	20	Gmpr	1.03147	1.06306	1.3934	1.17303	1.51991	1.05244	1.4531	0.826376	26.2739	-0.0566582	0.31529	-0.179702	0.857387	0.930289	NOT
ENSMUSG00000000263	2414	0	0	0	0	0	0	0	0	Glra1	0	0	0	0	0	0	0	0	0	NA	NA	NA	NA	NA	NA
ENSMUSG00000000266	8114	170	235	307	194	161	157	356	177	Mid2	2.2819	2.98008	3.71121	2.50583	2.00165	2.25263	4.62818	2.0938	212.681	0.417763	0.174452	2.39471	0.0166334	0.0679401	NOT
ENSMUSG00000000275	5754	1649	2331	2164	2173	2304	1663	1970	2055	Trim25	31.2129	41.6839	36.8892	39.5798	40.3934	33.6471	36.1153	34.2798	2021.81	-0.0974197	0.134131	-0.726305	0.467652	0.667666	NOT
ENSMUSG00000000276	8387	68	140	116	111	87	54	162	87	Dgke	0.88305	1.71758	1.35663	1.38708	1.04643	0.74957	2.03753	0.995656	99.4932	0.563852	0.196951	2.8629	0.00419783	0.0232009	UP
ENSMUSG00000000278	2097	405	516	596	520	483	322	572	433	Scpep1	21.0349	25.319	27.8779	25.989	23.2352	17.8765	28.7735	19.8192	471.315	0.145915	0.119309	1.223	0.221329	0.423202	NOT
ENSMUSG00000000282	4627	135	255	197	275	159	177	263	191	Mnt	3.17773	5.67069	4.17617	6.22899	3.46654	4.45347	5.99586	3.96215	202.601	0.303149	0.180052	1.68368	0.0922433	0.23653	NOT
ENSMUSG00000000290	3052	153	408	366	331	241	143	487	234	Itgb2	5.45997	13.7553	11.7627	11.3665	7.96582	5.45477	16.8322	7.35916	282.726	0.77593	0.173419	4.47432	7.67e-06	0.000135449	UP
ENSMUSG00000000295	3508	23	29	34	22	17	15	35	28	Hddc2	0.714087	0.850617	0.950672	0.657275	0.488863	0.497802	1.05246	0.766117	24.6626	0.252347	0.322329	0.782887	0.433694	0.640005	NOT
ENSMUSG00000000296	1323	65	102	63	86	69	65	66	85	Tpd52l1	5.35102	7.93297	4.67081	6.81276	5.26123	5.71977	5.26235	6.16674	74.8695	-0.104601	0.237887	-0.43971	0.660147	0.809675	NOT
ENSMUSG00000000301	2104	1837	2162	2657	2297	2541	1823	2480	2339	Pemt	95.0925	105.732	123.868	114.419	121.831	100.871	124.337	106.704	2239.64	-0.109438	0.108371	-1.00985	0.312569	0.524851	NOT
ENSMUSG00000000303	4574	806	829	1734	1225	760	767	1992	688	Cdh1	19.1921	18.6489	37.1847	28.0688	16.7616	19.522	45.9397	14.4374	1056.01	0.618497	0.210263	2.94153	0.00326592	0.019031	UP
ENSMUSG00000000305	7257	10	20	26	35	14	17	23	30	Cdh4	0.150081	0.283575	0.351421	0.50547	0.194612	0.27272	0.334323	0.39679	21.2957	0.288934	0.388185	0.74432	0.456683	0.658997	NOT
ENSMUSG00000000308	2496	0	0	1	0	0	0	5	1	Ckmt1	0	0	0.0392977	0	0	0	0.21131	0.038455	0.751328	1.93831	2.16078	0.897041	0.369697	NA	NOT
ENSMUSG00000000317	3719	53	52	72	89	74	35	92	44	Bcl6b	1.55215	1.43871	1.89897	2.50812	2.00726	1.09564	2.6095	1.13559	62.1773	0.282917	0.26665	1.06101	0.288686	0.500399	NOT
ENSMUSG00000000318	2899	6	4	16	14	9	5	15	5	Clec10a	0.225417	0.141973	0.541356	0.506132	0.313179	0.200792	0.545806	0.165546	8.8414	0.673368	0.560004	1.20243	0.229195	0.431956	NOT
ENSMUSG00000000320	4085	9	15	21	19	24	9	38	22	Alox12	0.239957	0.377828	0.504242	0.487468	0.592676	0.256493	0.981266	0.516925	18.7967	0.264232	0.426229	0.619929	0.535304	0.721	NOT
ENSMUSG00000000325	6715	215	460	400	406	351	206	510	279	Arvcf	3.48719	7.04867	5.84286	6.33672	5.27302	3.57147	8.0116	3.988	342.398	0.48503	0.165211	2.93583	0.00332655	0.0192965	NOT
ENSMUSG00000000326	2532	3255	2778	4940	4579	4303	2968	3620	3627	Comt	140.014	112.892	191.37	189.536	171.437	136.466	150.813	137.493	3715.46	-0.111424	0.172239	-0.646916	0.517686	0.70747	NOT
ENSMUSG00000000339	1880	116	179	148	185	170	99	186	151	Rtca	6.72021	9.79694	7.72174	10.3133	9.12198	6.13059	10.4364	7.70932	151.387	0.11442	0.18138	0.630833	0.52815	0.715866	NOT
ENSMUSG00000000340	3348	1263	1558	1363	1024	1110	1474	1590	1896	Dbt	41.0867	47.8826	39.9321	32.0552	33.4453	51.2551	50.0964	54.3563	1406.23	-0.334466	0.182207	-1.83563	0.0664118	0.187177	NOT
ENSMUSG00000000346	2900	1692	2416	1928	2290	1737	1631	2230	1837	Dazap2	63.5456	85.7224	65.211	82.7602	60.4227	65.4759	81.1152	60.8006	1947.25	0.0856213	0.127395	0.672095	0.501524	0.694617	NOT
ENSMUSG00000000355	1571	220	206	232	218	242	221	229	230	Mcts1	15.2521	13.4923	14.4852	14.5434	15.5395	16.3773	15.3764	14.0523	224.754	-0.330343	0.129505	-2.55082	0.0107471	0.0485432	NOT
ENSMUSG00000000359	2156	3	13	31	21	8	7	28	7	Rem1	0.15155	0.620426	1.41034	1.02083	0.374317	0.377985	1.36995	0.311635	13.7223	1.60084	0.476453	3.35991	0.000779689	0.00614743	UP
ENSMUSG00000000365	6241	1	5	0	1	1	3	3	1	Rnf17	0.0174513	0.0824349	0	0.0167931	0.0161638	0.0559619	0.0507063	0.0153795	1.89148	0.290118	1.2035	0.241062	0.809507	NA	NOT
ENSMUSG00000000374	8128	403	569	483	449	431	361	592	493	Trappc10	5.40013	7.20318	5.82874	5.78958	5.34923	5.17069	7.68304	5.82184	465.443	0.0343357	0.129361	0.265426	0.790681	0.891197	NOT
ENSMUSG00000000378	3666	225	292	339	360	277	181	309	265	Ccm2	6.68456	8.1957	9.07024	10.2919	7.62229	5.74793	8.89122	6.93826	275.259	0.184434	0.145653	1.26625	0.205422	0.40392	NOT
ENSMUSG00000000381	1008	0	0	0	0	0	0	0	0	Wap	0	0	0	0	0	0	0	0	0	NA	NA	NA	NA	NA	NA
ENSMUSG00000000384	3696	536	863	771	682	703	544	744	756	Tbrg4	15.7949	24.0256	20.4613	19.3391	19.1876	17.1353	21.2342	19.633	690.443	0.00134247	0.135661	0.00989575	0.992104	0.996113	NOT
ENSMUSG00000000385	7302	104	236	297	167	114	97	282	121	Tmprss2	1.55122	3.32557	3.98957	2.39695	1.57493	1.54652	4.07383	1.59052	169.196	0.883118	0.180988	4.87941	1.06e-06	2.54e-05	UP
ENSMUSG00000000386	3785	23	36	34	30	14	24	31	36	Mx1	0.661828	0.978661	0.881099	0.830691	0.37313	0.738194	0.863955	0.912922	27.9997	0.159838	0.325609	0.490889	0.623505	0.785944	NOT
ENSMUSG00000000392	5662	3	8	5	8	5	3	13	2	Fap	0.0577078	0.145384	0.0866187	0.148083	0.0890837	0.0616846	0.242197	0.0339045	5.59427	1.09592	0.676531	1.61991	0.105252	0.258672	NOT
ENSMUSG00000000394	1494	0	0	0	0	0	0	0	0	Gcg	0	0	0	0	0	0	0	0	0	NA	NA	NA	NA	NA	NA
ENSMUSG00000000399	2101	834	1012	1077	980	1014	768	1073	993	Ndufa9	43.2338	49.5621	50.2807	48.886	48.6867	42.556	53.8727	45.3649	957.632	-0.0781173	0.0959246	-0.814362	0.415438	0.623803	NOT
ENSMUSG00000000402	2704	2	0	2	3	2	0	2	0	Egfl6	0.0805576	0	0.0725496	0.116278	0.0746142	0	0.0780223	0	1.32558	0.510392	1.44603	0.352962	0.724117	NA	NOT
ENSMUSG00000000409	2929	18	36	30	28	27	23	33	19	Lck	0.669324	1.26467	1.00465	1.0019	0.929913	0.914184	1.18847	0.622632	26.3025	0.262272	0.311596	0.841703	0.399954	0.61058	NOT
ENSMUSG00000000411	1280	0	1	0	2	1	0	0	1	Tssk3	0	0.0803869	0	0.163759	0.0788112	0	0	0.0749872	0.610813	0.376359	2.07658	0.181239	0.85618	NA	NOT
ENSMUSG00000000416	8829	6	11	20	8	8	1	30	4	Cttnbp2	0.0740155	0.128197	0.222193	0.0949648	0.0914064	0.013186	0.358431	0.0434856	10.1095	1.56172	0.610178	2.55945	0.0104839	0.0477899	UP
ENSMUSG00000000420	5519	726	717	872	698	722	606	770	790	Galnt1	14.3271	13.3676	15.4977	13.255	13.197	12.7831	14.7172	13.7393	731.488	-0.176896	0.104333	-1.6955	0.08998	0.232494	NOT
ENSMUSG00000000435	2083	0	0	0	0	0	0	0	0	Myf5	0	0	0	0	0	0	0	0	0	NA	NA	NA	NA	NA	NA
ENSMUSG00000000439	7005	173	220	189	191	199	162	195	222	Mkrn2	2.68981	3.23154	2.64646	2.85765	2.86578	2.69235	2.93644	3.04188	192.713	-0.198717	0.147824	-1.34428	0.178858	0.368447	NOT
ENSMUSG00000000440	2953	117	254	257	179	124	132	253	212	Pparg	4.31524	8.85046	8.53653	6.35293	4.236	5.20398	9.03758	6.89079	185.134	0.41745	0.194326	2.14819	0.0316984	0.109676	NOT
ENSMUSG00000000441	6845	445	418	563	466	407	453	528	515	Raf1	7.08059	6.28345	8.06764	7.13505	5.99817	7.7046	8.13684	7.22155	470.755	-0.171744	0.125537	-1.36807	0.171289	0.35842	NOT
ENSMUSG00000000486	2763	22	50	55	44	42	25	59	41	2022-09-01	0.867211	1.86202	1.95251	1.669	1.53344	1.05338	2.25251	1.42429	40.8387	0.405325	0.264028	1.53516	0.124745	0.291291	NOT
ENSMUSG00000000486	2763	22	50	55	44	42	25	59	41	Gm4532	0.867211	1.86202	1.95251	1.669	1.53344	1.05338	2.25251	1.42429	40.8387	0.405325	0.264028	1.53516	0.124745	0.291291	NOT
ENSMUSG00000000489	4161	28	53	69	66	32	21	74	36	Pdgfb	0.732898	1.31061	1.62653	1.66238	0.775801	0.587553	1.87598	0.830427	45.1774	0.884974	0.243644	3.63224	0.000280968	0.00272043	UP
ENSMUSG00000000530	4265	64	75	113	111	100	51	126	70	Acvrl1	1.63435	1.80941	2.59879	2.72765	2.36526	1.39212	3.11635	1.57535	86.1511	0.294741	0.224735	1.31151	0.189687	0.3834	NOT
ENSMUSG00000000531	2033	19	59	31	39	35	16	38	28	Grasp	1.01789	2.98614	1.49567	2.01053	1.73672	0.916237	1.9717	1.32196	32.2375	0.516479	0.338744	1.52469	0.127336	0.295093	NOT
ENSMUSG00000000532	4418	307	494	329	325	358	291	349	362	Acvr1b	7.56825	11.5053	7.30435	7.70978	8.17439	7.66818	8.33288	7.86466	349.758	-0.0828804	0.179962	-0.460544	0.645126	0.799154	NOT
ENSMUSG00000000538	8764	472	513	511	544	584	468	497	573	Tom1l2	5.86574	6.02297	5.71913	6.5055	6.72216	6.21683	5.98204	6.27551	519.153	-0.296509	0.118674	-2.49851	0.0124715	0.0545916	NOT
ENSMUSG00000000544	2742	0	0	0	0	0	0	0	0	Gpa33	0	0	0	0	0	0	0	0	0	NA	NA	NA	NA	NA	NA
ENSMUSG00000000552	2515	206	539	359	508	381	197	540	255	Zfp385a	8.92097	22.0519	14.0013	21.1695	15.2822	9.11913	22.6491	9.73193	361.009	0.641423	0.214608	2.98881	0.00280065	0.0168309	UP
ENSMUSG00000000555	4933	513	596	777	616	603	476	773	620	Itga5	11.3263	12.4317	15.4498	13.0874	12.3312	11.2337	16.5296	12.0636	610.485	0.0367514	0.10714	0.343024	0.731581	0.856081	NOT
ENSMUSG00000000560	7640	0	0	0	0	0	0	0	0	Gabra2	0	0	0	0	0	0	0	0	0	NA	NA	NA	NA	NA	NA
ENSMUSG00000000561	4841	138	198	239	199	170	118	202	132	Wdr77	3.10475	4.20848	4.84255	4.30826	3.54252	2.83774	4.40161	2.61719	170.545	0.305037	0.158673	1.92242	0.0545529	0.162272	NOT
ENSMUSG00000000562	3729	1	3	3	1	0	0	1	0	Adora3	0.0292072	0.0827798	0.0789115	0.0281055	0	0	0.028288	0	1.05149	2.44709	1.61695	1.5134	0.130179	NA	NOT
ENSMUSG00000000562	3729	1	3	3	1	0	0	1	0	Tmigd3	0.0292072	0.0827798	0.0789115	0.0281055	0	0	0.028288	0	1.05149	2.44709	1.61695	1.5134	0.130179	NA	NOT
ENSMUSG00000000563	4105	3131	3567	3702	3817	3186	2684	4089	2774	Atp5pb	83.0717	89.4099	88.4575	97.4526	78.2944	76.1193	105.075	64.862	3323.44	0.0786124	0.111146	0.707288	0.479388	0.676833	NOT
ENSMUSG00000000567	4135	52	62	180	153	55	63	290	91	Sox9	1.36965	1.54281	4.26981	3.87793	1.34179	1.77374	7.39806	2.11233	110.617	1.08516	0.33572	3.23234	0.00122781	0.00874035	UP
ENSMUSG00000000568	7354	506	653	558	486	605	491	578	576	Hnrnpd	7.49393	9.13661	7.44256	6.92623	8.29908	7.7729	8.29086	7.51789	554.28	-0.213461	0.13468	-1.58495	0.112977	0.271367	NOT
ENSMUSG00000000579	3777	10	16	59	60	16	12	43	11	Dynlt1c	0.288361	0.435882	1.5322	1.6649	0.427338	0.369879	1.20093	0.279539	26.5702	1.56738	0.425119	3.68693	0.000226973	0.00229657	UP
ENSMUSG00000000581	3995	313	443	392	449	282	266	398	351	C1d	8.53317	11.4099	9.62456	11.7791	7.12083	7.75158	10.509	8.4331	355.758	0.20019	0.141413	1.41564	0.156881	0.337659	NOT
ENSMUSG00000000594	4127	656	828	1150	1109	600	541	1073	768	Gm2a	17.3122	20.6439	27.3322	28.1632	14.6661	15.2612	27.4259	17.8617	816.211	0.417455	0.126373	3.30335	0.000955374	0.00722834	NOT
ENSMUSG00000000600	21853	286	251	376	270	226	244	359	284	Krit1	1.4254	1.18184	1.68767	1.2949	1.04327	1.29988	1.73292	1.2474	282.852	-0.0230212	0.155566	-0.147984	0.882356	0.943367	NOT
ENSMUSG00000000605	8575	738	641	727	721	776	662	669	812	Clcn4	9.37357	7.69165	8.31595	8.81222	9.12905	8.98771	8.22976	9.08906	718.906	-0.39437	0.103908	-3.79539	0.000147414	0.00160301	NOT
ENSMUSG00000000606	4597	0	0	0	0	0	0	0	0	Vmn2r88	0	0	0	0	0	0	0	0	0	NA	NA	NA	NA	NA	NA
ENSMUSG00000000617	5421	0	0	0	0	0	0	0	0	Grm6	0	0	0	0	0	0	0	0	0	NA	NA	NA	NA	NA	NA
ENSMUSG00000000627	5290	1	1	3	3	1	3	4	1	Sema4f	0.0205886	0.0194509	0.0556259	0.059436	0.0190696	0.0660223	0.0797626	0.0181443	2.07106	0.549627	1.05309	0.52192	0.601726	NA	NOT
ENSMUSG00000000628	5969	32	49	66	61	42	27	77	47	Hk2	0.58389	0.844676	1.08456	1.07106	0.709816	0.526608	1.36077	0.755776	48.2472	0.495324	0.240019	2.06369	0.0390471	0.127586	NOT
ENSMUSG00000000631	16037	1082	1091	1277	1116	1518	988	1264	1372	Myo18a	7.3483	6.99998	7.81051	7.29332	9.54875	7.17231	8.31418	8.2116	1206.56	-0.337944	0.117635	-2.87283	0.00406818	0.022588	NOT
ENSMUSG00000000632	5779	0	0	0	1	0	0	1	0	Sez6	0	0	0	0.0181356	0	0	0.0182533	0	0.221838	1.14892	3.46409	0.331666	0.740141	NA	NOT
ENSMUSG00000000673	4681	1963	1714	1400	1205	2072	2055	1092	2651	Haao	45.6735	37.6762	29.336	26.9794	44.6529	51.1091	24.6082	54.3586	1806.48	-0.956973	0.172991	-5.53193	3.17e-08	1.27e-06	DOWN
ENSMUSG00000000682	1187	61	127	160	180	110	61	161	75	Cd52	5.59709	11.009	13.2215	15.893	9.34846	5.9828	14.3077	6.06467	112.326	0.757184	0.211207	3.58503	0.000337035	0.00314798	UP
ENSMUSG00000000686	3035	291	496	225	372	368	260	311	303	Abhd15	10.4428	16.8158	7.27169	12.846	12.2317	9.97332	10.8093	9.58254	327.392	-0.0572602	0.239914	-0.23867	0.811361	0.90425	NOT
ENSMUSG00000000690	1964	0	1	1	1	3	0	1	0	Hoxb6	0	0.0523907	0.0499425	0.0533633	0.154091	0	0.0537098	0	0.846038	0.16372	1.73926	0.094132	0.925004	NA	NOT
ENSMUSG00000000693	4603	25	43	55	68	43	32	65	27	Loxl3	0.591537	0.96122	1.17202	1.54829	0.942379	0.809346	1.48959	0.563015	43.3551	0.575651	0.274803	2.09477	0.036191	0.12107	UP
ENSMUSG00000000701	1055	0	0	0	0	0	0	0	0	Tcl1b5	0	0	0	0	0	0	0	0	0	NA	NA	NA	NA	NA	NA
ENSMUSG00000000706	4119	0	1	0	1	0	0	5	0	Btn1a1	0	0.0249806	0	0.0254444	0	0	0.128048	0	0.759376	2.92178	2.08572	1.40085	0.161258	NA	NOT
ENSMUSG00000000708	4867	1320	1031	1567	1235	1316	1263	1402	1532	Kat2b	29.539	21.7968	31.5805	26.5944	27.2768	30.2111	30.3866	30.213	1328.03	-0.342326	0.11769	-2.90872	0.00362909	0.0205771	NOT
ENSMUSG00000000711	4201	958	1013	962	1113	1093	842	1036	1079	Rab5b	24.8368	24.8115	22.4613	27.7669	26.2461	23.3338	26.0137	24.6528	1007.06	-0.219285	0.113412	-1.93354	0.0531702	0.159568	NOT
ENSMUSG00000000724	1594	1	1	0	0	0	2	0	0	Cryba1	0.0683274	0.0645516	0	0	0	0.146072	0	0	0.569714	-1.68216	2.29669	-0.732428	0.463907	NA	NOT
ENSMUSG00000000730	2988	0	0	0	0	0	0	0	0	Dnmt3l	0	0	0	0	0	0	0	0	0	NA	NA	NA	NA	NA	NA
ENSMUSG00000000731	3825	0	0	0	0	0	0	0	0	Aire	0	0	0	0	0	0	0	0	0	NA	NA	NA	NA	NA	NA
ENSMUSG00000000732	4620	10	41	47	52	17	13	55	22	Icosl	0.235744	0.91314	0.997855	1.17963	0.371197	0.327587	1.25579	0.457065	30.2413	1.37955	0.30897	4.46501	8.01e-06	0.00014015	UP
ENSMUSG00000000738	4518	384	463	598	487	504	358	473	466	Spg7	9.25695	10.5446	12.9827	11.2971	11.2534	9.22491	11.0436	9.90003	460.261	-0.0370223	0.131705	-0.281099	0.778635	0.883558	NOT
ENSMUSG00000000739	4419	50	8	15	14	24	53	3	53	Sult5a1	1.23234	0.186278	0.33295	0.332038	0.54788	1.39629	0.0716131	1.15119	29.4452	-2.45675	0.443136	-5.54401	2.96e-08	1.2e-06	DOWN
ENSMUSG00000000740	2595	1833	3472	2516	3766	3055	1992	3133	2644	Rpl13	76.9322	137.67	95.1009	152.099	118.76	89.367	127.356	97.796	2754.3	0.177077	0.182512	0.970222	0.331936	0.545046	NOT
ENSMUSG00000000743	3272	685	997	1022	1105	901	654	951	939	Chmp1a	22.8013	31.3529	30.6372	35.3943	27.7786	23.2696	30.6593	27.5454	891.71	0.0918204	0.128401	0.715106	0.474544	0.672959	NOT
ENSMUSG00000000751	5578	265	391	386	333	292	297	360	315	Rpa1	5.17429	7.21263	6.78766	6.25677	5.28083	6.19874	6.80799	5.42037	326.022	0.0484601	0.133437	0.363167	0.71648	0.846548	NOT
ENSMUSG00000000753	2359	5958	4584	5283	4868	6377	6087	3749	7529	Serpinf1	275.078	199.946	219.667	216.275	272.701	300.4	167.642	306.342	5632.74	-0.762392	0.138726	-5.49565	3.89e-08	1.51e-06	DOWN
ENSMUSG00000000759	8568	228	282	290	221	264	260	304	308	Tubgcp3	2.89827	3.38661	3.31994	2.70332	3.1083	3.5328	3.74274	3.45039	267.96	-0.233494	0.140488	-1.66201	0.09651	0.243616	NOT
ENSMUSG00000000766	8037	0	0	0	0	0	0	0	0	Oprm1	0	0	0	0	0	0	0	0	0	NA	NA	NA	NA	NA	NA
ENSMUSG00000000776	2854	79	156	124	135	127	50	123	111	Polr3d	3.01478	5.62427	4.26166	4.95752	4.48898	2.03958	4.54618	3.73307	110.223	0.301675	0.241425	1.24956	0.21146	0.411162	NOT
ENSMUSG00000000782	3019	45	135	132	115	67	53	194	80	Tcf7	1.62343	4.60115	4.28867	3.99226	2.23877	2.0438	6.7785	2.54345	97.5006	0.953619	0.212512	4.48736	7.21e-06	0.000128358	UP
ENSMUSG00000000787	5277	3704	3539	3737	3261	3403	2981	3966	3883	Ddx3x	76.4481	69.0063	69.462	64.7661	65.0538	65.7658	79.2795	70.628	3537.22	-0.22819	0.0945511	-2.4134	0.0158045	0.0652983	NOT
ENSMUSG00000000791	4105	11	13	6	11	6	7	10	9	Il12rb1	0.291852	0.325856	0.143367	0.280843	0.147447	0.198523	0.25697	0.210439	9.08986	0.00365787	0.518385	0.00705627	0.99437	0.997388	NOT
ENSMUSG00000000792	2928	2	1	1	1	0	0	2	0	Slc5a5	0.0743947	0.0351418	0.0334997	0.0357942	0	0	0.0720533	0	0.839733	0.993992	1.74576	0.569375	0.569102	NA	NOT
ENSMUSG00000000794	10451	2	5	7	6	1	2	8	0	Kcnn3	0.0208428	0.0492275	0.0656979	0.0601697	0.00965251	0.0222791	0.0807472	0	3.62364	2.06536	0.914476	2.25852	0.0239134	0.0888295	UP
ENSMUSG00000000804	7680	466	398	588	468	408	449	606	544	Usp32	6.60857	5.33233	7.50979	6.38659	5.35916	6.80629	8.32351	6.79884	485.457	-0.151136	0.140628	-1.07473	0.282497	0.49404	NOT
ENSMUSG00000000805	1966	1	0	0	0	0	0	0	0	Car4	0.0553987	0	0	0	0	0	0	0	0.142333	-1.0051	3.53381	-0.284424	0.776085	NA	NOT
ENSMUSG00000000811	2836	68	121	68	50	89	40	99	83	Txnrd3	2.61147	4.3901	2.35188	1.84777	3.16579	1.64202	3.68234	2.80911	75.8944	0.0136448	0.300239	0.0454463	0.963752	0.983471	NOT
ENSMUSG00000000817	1937	3	7	6	4	4	4	9	2	Fasl	0.168684	0.371847	0.303832	0.216429	0.208319	0.240412	0.490126	0.0991054	4.71541	0.699986	0.701612	0.997683	0.318433	0.531257	NOT
ENSMUSG00000000823	6810	434	448	523	398	536	395	432	460	Zfp512b	6.94106	6.76903	7.53297	6.1252	7.93991	6.75267	6.69163	6.48347	451.857	-0.299526	0.132117	-2.26713	0.0233822	0.0873373	NOT
ENSMUSG00000000826	6953	888	1360	1234	1333	1035	902	1416	1110	Dnajc5	13.9099	20.1262	17.4082	20.0929	15.0164	15.1029	21.4826	15.3231	1139.31	0.165206	0.10513	1.57145	0.116078	0.27696	NOT
ENSMUSG00000000827	4982	256	290	370	322	285	235	392	313	Tpd52l2	5.59654	5.98949	7.28466	6.77386	5.77084	5.49148	8.29999	6.03028	302.16	0.0523553	0.11852	0.441743	0.658676	0.808681	NOT
ENSMUSG00000000838	8966	389	425	495	387	303	357	544	387	Fmr1	4.72535	4.87737	5.41524	4.52373	3.40912	4.63548	6.40023	4.14294	404.55	0.0713026	0.144457	0.493591	0.621595	0.78496	NOT
ENSMUSG00000000861	13175	4	1	12	5	6	4	15	5	Bcl11a	0.0330668	0.00780989	0.0893392	0.0397744	0.0459408	0.0353455	0.120098	0.0364264	6.15366	0.478478	0.712574	0.671479	0.501916	0.694974	NOT
ENSMUSG00000000869	1227	1	0	3	1	2	3	4	1	Il4	0.0887643	0	0.239822	0.0854161	0.164431	0.284644	0.343883	0.0782262	1.84628	-0.154775	1.158	-0.133657	0.893674	NA	NOT
ENSMUSG00000000876	3114	2645	2308	3011	2469	2888	2346	2396	3367	Pxmp4	92.5103	76.2628	94.8427	83.0973	93.5571	87.7071	81.164	103.782	2673.96	-0.417712	0.111534	-3.74515	0.000180289	0.0018959	NOT
ENSMUSG00000000881	5844	247	280	222	218	245	283	278	307	Dlg3	4.6033	4.92996	3.7261	3.90958	4.22916	5.63769	5.01799	5.04226	260.911	-0.399628	0.159801	-2.50077	0.0123922	0.0542726	NOT
ENSMUSG00000000884	4219	20	43	34	40	25	27	22	18	Gnb1l	0.516302	1.04871	0.790462	0.993653	0.597762	0.74504	0.550058	0.409506	28.3606	0.34896	0.348048	1.00262	0.316043	0.528804	NOT
ENSMUSG00000000889	2692	0	0	0	0	0	0	0	0	Dbh	0	0	0	0	0	0	0	0	0	NA	NA	NA	NA	NA	NA
ENSMUSG00000000901	2778	13	14	27	23	8	22	27	12	Mmp11	0.509676	0.518551	0.95333	0.86772	0.290506	0.921968	1.02524	0.414616	17.8765	0.408704	0.422443	0.967477	0.333305	0.546469	NOT
ENSMUSG00000000902	7930	218	155	345	224	188	204	289	257	Smarcb1	2.9941	2.01119	4.26734	2.96046	2.39157	2.9949	3.84432	3.11069	231.057	-0.0735779	0.203902	-0.360849	0.718213	0.847704	NOT
ENSMUSG00000000903	859	4	5	3	6	1	3	3	7	Vpreb3	0.507166	0.598925	0.342562	0.732053	0.117437	0.406587	0.368403	0.782171	3.96711	-0.0716112	0.787381	-0.0909486	0.927533	0.964733	NOT
ENSMUSG00000000915	7369	456	522	402	273	582	394	348	522	Hip1r	6.73968	7.28882	5.35093	3.88274	7.96732	6.22462	4.98157	6.79922	440.918	-0.60475	0.20143	-3.00229	0.00267958	0.0162345	DOWN
ENSMUSG00000000916	4317	79	142	143	154	115	83	120	126	Nsun5	1.9931	3.38456	3.24912	3.73872	2.68729	2.23832	2.93221	2.80147	117.82	0.20804	0.19053	1.0919	0.274876	0.485599	NOT
ENSMUSG00000000934	2043	212	228	225	209	250	208	160	305	Top1mt	11.3019	11.4832	10.8025	10.7217	12.3444	11.8528	8.26127	14.3294	225.539	-0.50974	0.175051	-2.91195	0.00359186	0.020418	DOWN
ENSMUSG00000000938	3270	0	0	0	0	0	0	0	0	Hoxa10	0	0	0	0	0	0	0	0	0	NA	NA	NA	NA	NA	NA
ENSMUSG00000000942	1594	8	6	8	2	7	8	12	6	Hoxa4	0.546619	0.38731	0.492281	0.1315	0.443004	0.584288	0.794124	0.361293	7.09745	-0.364899	0.602839	-0.605301	0.544979	0.727257	NOT
ENSMUSG00000000948	5216	31	32	28	11	12	21	41	18	NA	0.647302	0.631259	0.526541	0.221024	0.232082	0.468713	0.829166	0.331232	23.8799	0.136535	0.430076	0.317466	0.75089	0.868039	NOT
ENSMUSG00000000957	5960	708	1392	1379	1122	1297	786	1548	1108	Mmp14	12.9381	24.0319	22.695	19.7302	21.9529	15.3533	27.3981	17.8439	1138.64	0.209997	0.166224	1.26334	0.206468	0.405287	NOT
ENSMUSG00000000958	3315	57	41	103	69	43	54	98	55	Slc7a7	1.87273	1.27261	3.04765	2.18147	1.30853	1.89642	3.11844	1.59249	63.2123	0.264998	0.274301	0.966086	0.334001	0.547281	NOT
ENSMUSG00000000959	4457	691	800	837	674	818	766	807	862	Oxa1l	16.8857	18.469	18.4202	15.849	18.5144	20.0084	19.0997	18.5636	779.779	-0.291238	0.113199	-2.57279	0.0100883	0.0464243	NOT
ENSMUSG00000000976	6419	212	213	299	266	250	205	323	251	Heatr6	3.59709	3.41435	4.56894	4.34309	3.9289	3.71802	5.30799	3.75321	248.32	-0.024665	0.13597	-0.1814	0.856054	0.929498	NOT
ENSMUSG00000000982	766	0	3	5	5	5	2	8	3	Ccl3	0	0.402984	0.640255	0.684109	0.658475	0.303967	1.10168	0.375915	3.65777	0.791858	0.846025	0.935974	0.349287	0.56263	NOT
ENSMUSG00000000983	1220	4	2	2	2	0	0	6	1	Wfdc18	0.357095	0.168681	0.160798	0.171812	0	0	0.518784	0.0786751	2.01036	0.947182	1.2161	0.778867	0.436058	NA	NOT
ENSMUSG00000001014	1110	0	0	0	0	0	0	0	0	Icam4	0	0	0	0	0	0	0	0	0	NA	NA	NA	NA	NA	NA
ENSMUSG00000001016	8580	102	194	195	231	144	103	240	130	Ilf2	1.29478	2.32654	2.22925	2.82169	1.69306	1.39758	2.95066	1.4543	161.939	0.567314	0.160151	3.54238	0.00039654	0.00357267	UP
ENSMUSG00000001017	3637	723	934	792	875	722	585	807	726	Chtop	21.651	26.424	21.3596	25.2144	20.0259	18.7257	23.4059	19.1598	762.304	0.0335259	0.132575	0.252882	0.800359	0.897877	NOT
ENSMUSG00000001018	2290	236	253	310	236	230	228	316	296	Snapin	11.2243	11.3679	13.2782	10.8009	10.1319	11.5911	14.5562	12.4066	259.914	-0.113374	0.132579	-0.855146	0.392471	0.604245	NOT
ENSMUSG00000001020	584	0	1	1	0	1	1	1	0	S100a4	0	0.176191	0.167957	0	0.172737	0.199348	0.180627	0	0.618098	0.276453	1.91664	0.144239	0.885312	NA	NOT
ENSMUSG00000001021	2670	0	0	1	0	1	0	0	0	S100a3	0	0	0.0367367	0	0.0377822	0	0	0	0.239762	-0.283769	3.37626	-0.0840484	0.933018	NA	NOT
ENSMUSG00000001023	432	0	0	0	0	0	0	0	0	S100a5	0	0	0	0	0	0	0	0	0	NA	NA	NA	NA	NA	NA
ENSMUSG00000001025	1367	21	35	37	33	12	10	47	15	S100a6	1.67315	2.63448	2.65488	2.53005	0.885545	0.851641	3.62681	1.05322	24.954	1.1027	0.336379	3.27816	0.00104485	0.00773517	UP
ENSMUSG00000001027	7041	2	1	1	1	0	0	1	5	Scn4a	0.030937	0.0146137	0.0139308	0.014885	0	0	0.0149817	0.0681605	1.34883	-1.0267	1.42762	-0.719168	0.472038	NA	NOT
ENSMUSG00000001029	1904	39	52	61	62	51	38	56	37	Icam2	2.2309	2.81017	3.14249	3.41279	2.7021	2.3235	3.10253	1.86523	48.6412	0.20266	0.236102	0.858355	0.390697	0.602173	NOT
ENSMUSG00000001034	4394	30	58	73	78	50	29	87	38	Mapk7	0.743608	1.3582	1.62958	1.86045	1.14791	0.768357	2.0886	0.830081	53.1069	0.729589	0.241233	3.02441	0.00249116	0.0153389	UP
ENSMUSG00000001036	5228	152	234	267	224	154	140	265	191	Epn2	3.16658	4.60549	5.00942	4.49052	2.97155	3.11758	5.34694	3.50667	197.923	0.356058	0.132856	2.68004	0.00736136	0.0362684	NOT
ENSMUSG00000001039	1593	5	9	11	10	6	2	5	6	B9d1	0.341851	0.581329	0.677312	0.657913	0.379956	0.146164	0.331093	0.36152	6.5199	0.623358	0.612347	1.01798	0.308687	0.521658	NOT
ENSMUSG00000001052	6020	419	340	556	345	382	384	479	452	Sec24b	7.58055	5.81136	9.0592	6.0063	6.40125	7.42609	8.39333	7.20674	415.923	-0.224104	0.155105	-1.44485	0.148501	0.325059	NOT
ENSMUSG00000001053	2728	21	33	49	34	44	20	28	32	N4bp3	0.838413	1.2447	1.76183	1.30623	1.62707	0.853514	1.0827	1.12591	31.979	0.0322194	0.32319	0.0996919	0.920589	0.961128	NOT
ENSMUSG00000001054	2161	124	224	193	192	149	110	175	190	Rmnd5b	6.24957	10.6657	8.7602	9.31174	6.95552	5.92602	8.54237	8.43909	166.216	0.19241	0.179913	1.06946	0.284862	0.496424	NOT
ENSMUSG00000001056	1146	134	407	273	506	285	136	368	226	Nhp2	12.7351	36.5431	23.3663	46.2754	25.0876	13.8159	33.8734	18.9287	281.802	0.745899	0.252892	2.94948	0.00318309	0.0186375	UP
ENSMUSG00000001062	5153	183	217	194	182	202	211	164	260	Vps9d1	3.86789	4.33306	3.69278	3.70165	3.95448	4.76703	3.35721	4.84295	202.587	-0.448984	0.169701	-2.64574	0.00815136	0.0393605	NOT
ENSMUSG00000001065	5530	162	240	181	192	214	182	179	294	Zfp276	3.1906	4.46562	3.21044	3.63882	3.90379	3.83152	3.41447	5.10292	205.025	-0.36204	0.194265	-1.86363	0.0623731	0.178753	NOT
ENSMUSG00000001076	1474	1	0	1	0	5	1	0	0	C1ql4	0.07389	0	0.0665448	0	0.342193	0.0789819	0	0	1.06206	-2.8066	1.80902	-1.55145	0.120795	NA	NOT
ENSMUSG00000001082	2894	39	115	91	130	59	44	112	58	Mfsd10	1.46774	4.08879	3.08428	4.70792	2.05661	1.77002	4.08239	1.92365	77.8924	0.895231	0.221089	4.04918	5.14e-05	0.000671105	UP
ENSMUSG00000001089	8112	367	548	606	511	382	295	616	461	Luzp1	4.92744	6.95101	7.32751	6.60203	4.75044	4.23369	8.01029	5.45469	460.379	0.324665	0.115814	2.80334	0.00505764	0.0269033	NOT
ENSMUSG00000001095	2412	15	7	5	6	8	10	4	21	Slc13a2	0.677325	0.298618	0.203331	0.26071	0.334588	0.482667	0.174935	0.835678	9.8062	-1.55631	0.538906	-2.88791	0.0038781	0.0217472	DOWN
ENSMUSG00000001098	4039	100	154	167	191	111	81	159	116	Kctd10	2.69655	3.92322	4.05559	4.95614	2.77234	2.33473	4.15258	2.75665	131.212	0.445132	0.16784	2.65212	0.00799879	0.0387858	NOT
ENSMUSG00000001100	3783	970	890	1104	927	1162	897	951	1150	Poldip2	27.9266	24.2075	28.6249	25.6819	30.9862	27.6046	26.5179	29.1782	1004.7	-0.388513	0.103124	-3.76743	0.000164936	0.00176978	NOT
ENSMUSG00000001103	1359	3	2	0	1	1	1	5	6	Sebox	0.240428	0.151428	0	0.0771196	0.0742299	0.0856655	0.388102	0.423769	2.32815	-0.723565	1.11235	-0.650483	0.51538	NA	NOT
ENSMUSG00000001105	1525	288	205	304	265	345	278	274	380	Ift20	20.5686	13.8318	19.5531	18.2121	22.8217	21.2227	18.9529	23.9172	293.003	-0.581149	0.135167	-4.29949	1.71e-05	0.000267451	DOWN
ENSMUSG00000001119	4380	174	265	488	317	160	116	403	139	Col6a1	4.32671	6.2254	10.9284	7.58524	3.68505	3.08325	9.70568	3.04605	244.741	1.02631	0.192622	5.32808	9.93e-08	3.41e-06	UP
ENSMUSG00000001120	2933	15	23	27	19	19	19	26	19	Pcbp3	0.557009	0.806884	0.902949	0.678931	0.653491	0.754166	0.935097	0.621782	20.5232	0.112958	0.334375	0.337818	0.7355	0.858729	NOT
ENSMUSG00000001123	2137	4639	4054	5669	4658	4937	4354	4293	5160	Lgals9	236.43	195.198	260.204	228.444	233.054	237.197	211.91	231.762	4708.86	-0.314694	0.116859	-2.69293	0.00708281	0.0351518	NOT
ENSMUSG00000001127	6541	1027	838	926	743	1047	975	858	1211	Araf	17.1005	13.1824	13.886	11.905	16.1473	17.3534	13.8369	17.7704	960.227	-0.621363	0.100748	-6.16753	6.94e-10	4.7e-08	DOWN
ENSMUSG00000001128	1736	474	946	620	847	741	443	983	506	Cfp	29.738	56.0708	35.0311	51.135	43.0593	29.7084	59.7309	27.9768	678.529	0.378483	0.194604	1.94489	0.051788	0.156872	NOT
ENSMUSG00000001131	888	0	7	8	8	2	1	11	0	Timp1	0	0.811112	0.883667	0.944194	0.227204	0.131103	1.3067	0	4.21545	3.21063	1.03437	3.10394	0.00190964	0.0123811	UP
ENSMUSG00000001134	1639	106	153	139	100	111	108	112	111	Uxt	7.04385	9.60523	8.31855	6.39448	6.83191	7.67132	7.20832	6.50041	116.835	-0.0713541	0.196739	-0.362683	0.716842	0.846738	NOT
ENSMUSG00000001138	6420	336	232	255	301	269	385	273	366	Cnnm3	5.70016	3.71833	3.89598	4.91378	4.22684	6.98154	4.48562	5.47196	306.605	-0.645764	0.174797	-3.69436	0.000220438	0.00223447	DOWN
ENSMUSG00000001143	7359	171	81	155	138	177	152	114	171	Lman2l	2.53081	1.13256	2.06597	1.96537	2.42635	2.40464	1.63411	2.23036	146.572	-0.747707	0.193796	-3.85821	0.00011422	0.00128924	DOWN
ENSMUSG00000001150	7197	300	316	409	328	330	278	389	343	Mcm3ap	4.53997	4.51784	5.57421	4.77646	4.62552	4.49695	5.70156	4.57446	332.37	-0.0794385	0.11481	-0.691914	0.488991	0.683493	NOT
ENSMUSG00000001151	12154	211	224	195	213	225	184	254	248	Pcnt	1.8908	1.89638	1.57372	1.83673	1.8675	1.76248	2.2045	1.95853	217.97	-0.247706	0.138278	-1.79136	0.0732362	0.200223	NOT
ENSMUSG00000001155	3192	3867	5851	4547	3953	4415	4424	4846	5642	Ftcd	131.945	188.609	139.725	129.792	139.529	161.353	160.146	169.655	4670.92	-0.20549	0.155075	-1.32511	0.185136	0.377963	NOT
ENSMUSG00000001156	7072	106	173	128	130	97	132	160	158	Mxd1	1.63248	2.51709	1.77533	1.92657	1.38365	2.17299	2.38656	2.14443	134.193	-0.0160264	0.205262	-0.0780779	0.937766	0.970549	NOT
ENSMUSG00000001157	6493	151	108	148	123	135	135	149	142	Gmcl1	2.53288	1.71149	2.23577	1.98538	2.09743	2.42055	2.42067	2.09913	136.424	-0.385002	0.16116	-2.38895	0.0168967	0.0686996	NOT
ENSMUSG00000001158	1837	115	138	138	149	130	95	151	115	Snrnp27	6.81823	7.72975	7.36854	8.50083	7.13892	6.0206	8.67088	6.00877	127.023	0.0610152	0.159738	0.381972	0.702482	0.837761	NOT
ENSMUSG00000001166	2405	13	17	14	22	12	10	24	13	Oas1c	0.588723	0.727326	0.570985	0.95872	0.503343	0.484072	1.05267	0.51883	15.2161	0.400866	0.395644	1.0132	0.310966	0.523724	NOT
ENSMUSG00000001168	1703	2	2	1	0	1	0	0	1	Oas1h	0.127908	0.12084	0.0575966	0	0.0592357	0	0	0.0563615	0.889156	-0.655405	1.69649	-0.386329	0.699253	NA	NOT
ENSMUSG00000001173	9486	187	179	206	192	154	188	278	203	Ocrl	2.14705	1.94163	2.13008	2.1213	1.63771	2.30728	3.09141	2.05404	196.066	-0.0718706	0.167921	-0.428003	0.668649	0.814998	NOT
ENSMUSG00000001175	4706	1751	1684	2264	1663	1323	1453	2108	1710	Calm1	40.5245	36.8202	47.1885	37.036	28.36	35.945	47.2513	34.8772	1719.48	0.0138562	0.135972	0.101905	0.918832	0.960551	NOT
ENSMUSG00000001175	4706	1751	1684	2264	1663	1323	1453	2108	1710	Calm2	40.5245	36.8202	47.1885	37.036	28.36	35.945	47.2513	34.8772	1719.48	0.0138562	0.135972	0.101905	0.918832	0.960551	NOT
ENSMUSG00000001211	7790	4639	5438	6080	5886	6291	4537	5034	6085	Agpat3	64.859	71.8286	76.5557	79.1894	81.4667	67.8042	68.1665	74.9756	5462.3	-0.210628	0.124939	-1.68585	0.0918252	0.235816	NOT
ENSMUSG00000001225	6369	0	0	0	0	0	0	0	0	Slc26a3	0	0	0	0	0	0	0	0	0	NA	NA	NA	NA	NA	NA
ENSMUSG00000001227	3968	70	146	99	107	143	99	116	106	Sema6b	1.92136	3.78597	2.44723	2.82616	3.63549	2.90462	3.08377	2.56408	110.004	-0.105385	0.235707	-0.447101	0.654802	0.80587	NOT
ENSMUSG00000001228	4259	8	25	23	17	15	3	38	2	Uhrf1	0.204581	0.603987	0.529702	0.418336	0.355289	0.0820047	0.941177	0.0450733	15.2883	1.58687	0.53325	2.97584	0.00292183	0.0174163	UP
ENSMUSG00000001229	7883	610	734	845	709	770	499	554	718	Dpp9	8.42794	9.58076	10.5142	9.42625	9.85365	7.36944	7.41333	8.74238	674.024	-0.135555	0.164983	-0.821633	0.411286	0.619908	NOT
ENSMUSG00000001240	3301	83	134	202	158	117	83	172	97	Ramp2	2.73852	4.17691	6.0023	5.01644	3.57551	2.92724	5.4964	2.82048	126.389	0.525092	0.17606	2.98246	0.00285938	0.0170863	UP
ENSMUSG00000001247	2172	721	533	992	964	648	735	787	888	Lsr	36.1542	25.2501	44.7985	46.5159	30.0963	39.3961	38.2217	39.2419	776.587	-0.157061	0.183741	-0.854796	0.392664	0.604322	NOT
ENSMUSG00000001248	5239	174	216	291	250	222	180	286	218	Gramd1a	3.61729	4.24229	5.44824	5.00122	4.27467	3.9999	5.75855	3.99397	225.11	0.109569	0.134008	0.817632	0.413567	0.622011	NOT
ENSMUSG00000001249	4101	3206	4158	3398	4229	4569	3404	3044	4398	Hpn	85.1445	104.325	81.2728	108.077	112.39	96.6329	78.2979	102.935	3804.09	-0.330512	0.167442	-1.97389	0.0483941	0.14952	NOT
ENSMUSG00000001260	7869	0	0	0	0	0	0	0	0	Gabrg1	0	0	0	0	0	0	0	0	0	NA	NA	NA	NA	NA	NA
ENSMUSG00000001270	2895	92	142	228	226	138	97	301	103	Ckb	3.46116	5.04702	7.72499	8.18171	4.80871	3.90075	10.9676	3.41496	158.53	0.765595	0.211699	3.61642	0.000298701	0.00285767	UP
ENSMUSG00000001280	8262	729	872	883	801	678	738	1014	857	Sp1	9.61004	10.8599	10.483	10.1609	8.27833	10.3991	12.9464	9.95617	812.037	-0.0362154	0.113872	-0.318037	0.750457	0.867896	NOT
ENSMUSG00000001281	2770	23	48	69	66	38	32	67	29	Itgb7	0.904339	1.78302	2.44332	2.49717	1.38389	1.34492	2.55147	1.00488	44.7482	0.747364	0.256376	2.91511	0.0035556	0.0202694	UP
ENSMUSG00000001285	2823	165	207	207	165	180	175	186	237	Myg1	6.36585	7.54493	7.19235	6.12572	6.4322	7.21693	6.9502	8.05813	189.277	-0.259397	0.155649	-1.66655	0.0956036	0.241962	NOT
ENSMUSG00000001288	4261	87	140	188	199	115	84	227	80	Rarg	2.22377	3.38074	4.32771	4.8947	2.7226	2.29505	5.61965	1.80209	134.529	0.750957	0.1911	3.92965	8.51e-05	0.00101057	UP
ENSMUSG00000001289	1394	333	456	365	543	417	308	454	406	Pfdn5	26.0174	33.6587	25.6828	40.8245	30.1767	25.7225	34.3549	27.955	405.114	0.0451449	0.162359	0.278057	0.780969	0.885147	NOT
ENSMUSG00000001300	6855	53	90	64	72	60	52	79	65	Efnb2	0.842076	1.35092	0.915765	1.1008	0.882962	0.883123	1.21567	0.910129	65.8933	0.133502	0.215163	0.620471	0.534948	0.720857	NOT
ENSMUSG00000001305	3239	85	157	107	128	132	67	131	98	Rrp15	2.85819	4.98751	3.24029	4.14174	4.11113	2.40818	4.26634	2.9041	111.038	0.190789	0.222852	0.856125	0.391929	0.603521	NOT
ENSMUSG00000001313	1990	71	105	85	69	114	64	68	101	Rnd2	3.88587	5.42915	4.18965	3.63396	5.77896	3.74414	3.60455	4.87153	84.4067	-0.357164	0.238231	-1.49923	0.133813	0.304495	NOT
ENSMUSG00000001323	4560	561	357	515	531	504	442	453	502	Srr	13.3993	8.05562	11.0778	12.2043	11.1497	11.2845	10.4792	10.5666	484.032	-0.401176	0.15188	-2.64141	0.00825618	0.0397301	NOT
ENSMUSG00000001333	2862	3	11	1	2	1	0	2	3	Sync	0.114165	0.395475	0.0342722	0.0732394	0.0352475	0	0.073715	0.100612	2.80983	0.987684	1.11603	0.884996	0.376159	NA	NOT
ENSMUSG00000001334	2763	1	3	10	7	2	2	6	1	Fndc5	0.0394187	0.111721	0.355002	0.265523	0.0730209	0.0842703	0.229069	0.0347389	3.72722	1.81572	0.878696	2.06638	0.0387929	0.127052	UP
ENSMUSG00000001348	2030	581	786	847	808	644	513	886	619	Acp5	31.1719	39.8402	40.926	41.7157	32.0028	29.4203	46.0397	29.2679	696.038	0.216063	0.0957665	2.25614	0.0240617	0.0891447	NOT
ENSMUSG00000001349	2736	2	1	0	1	0	2	2	1	Cnn1	0.0796154	0.0376079	0	0.0383061	0	0.0851019	0.0771097	0.0350817	1.16065	-0.645335	1.44703	-0.445972	0.655617	NA	NOT
ENSMUSG00000001366	3103	810	541	843	655	799	786	661	862	Fbxo9	28.4306	17.9395	26.6476	22.123	25.9755	29.4894	22.4706	26.6638	749.137	-0.561278	0.133152	-4.21531	2.49e-05	0.000363097	DOWN
ENSMUSG00000001376	10856	175	144	200	153	125	160	182	166	Vps50	1.7557	1.36486	1.80706	1.47709	1.16155	1.71583	1.76847	1.46769	162.24	-0.178405	0.176139	-1.01287	0.311123	0.523831	NOT
ENSMUSG00000001380	2447	285	387	370	422	397	281	363	369	Hars	12.6851	16.2732	14.8313	18.0744	16.3665	13.369	15.6483	14.474	355.445	-0.0576226	0.144363	-0.39915	0.689783	0.829836	NOT
ENSMUSG00000001383	2592	286	346	260	334	335	228	265	321	Zmat2	12.0175	13.7353	9.83898	13.505	13.0379	10.2406	10.7847	11.8869	296.004	-0.219669	0.174066	-1.26199	0.206954	0.40589	NOT
ENSMUSG00000001403	2600	27	247	245	113	52	18	218	39	Ube2c	1.13103	9.77505	9.24282	4.55501	2.01757	0.80598	8.8446	1.43975	110.605	2.33291	0.30178	7.73049	1.07e-14	2.74e-12	UP
ENSMUSG00000001415	6956	499	683	825	973	658	472	877	653	Smg5	7.81311	10.1031	11.6334	14.6601	9.54255	7.89965	13.2995	9.01053	687.741	0.283803	0.137851	2.05877	0.0395161	0.128616	NOT
ENSMUSG00000001416	6370	1147	1326	1584	1596	1263	1012	1595	1182	Cct3	19.6113	21.419	24.3909	26.259	20.0015	18.4955	26.4129	17.8105	1315.19	0.123201	0.101099	1.21862	0.222989	0.424882	NOT
ENSMUSG00000001418	6291	522	573	680	715	665	466	624	625	Glmp	9.0372	9.37196	10.6023	11.9116	10.6635	8.62366	10.4631	9.5358	601.886	-0.0869686	0.127472	-0.682255	0.495078	0.689029	NOT
ENSMUSG00000001419	5985	958	1121	1144	1178	1162	873	1281	926	Mef2d	17.4335	19.2725	18.7488	20.6284	19.5857	16.9815	22.5777	14.8506	1068.04	-0.0141872	0.11839	-0.119834	0.904614	0.954732	NOT
ENSMUSG00000001420	2912	18	19	23	24	25	21	28	26	Tmem79	0.673231	0.671363	0.774726	0.863782	0.866058	0.839563	1.01429	0.856996	22.7856	-0.219398	0.317436	-0.691157	0.489467	0.683931	NOT
ENSMUSG00000001424	9757	848	1052	1026	1129	963	809	1186	1013	Snd1	9.46591	11.0942	10.3144	12.1272	9.95653	9.65289	12.8222	9.96529	990.277	-0.0035769	0.0990505	-0.0361119	0.971193	0.986066	NOT
ENSMUSG00000001435	7021	8555	8930	7425	7331	12258	9378	6076	12761	Col18a1	132.71	130.872	103.731	109.433	176.124	155.502	91.2881	174.455	9212.4	-0.787913	0.166312	-4.73757	2.16e-06	4.58e-05	DOWN
ENSMUSG00000001436	4644	142	208	159	126	241	151	173	180	Slc19a1	3.33027	4.60857	3.35828	2.84356	5.23508	3.78538	3.92961	3.72029	172.359	-0.371311	0.209272	-1.7743	0.0760143	0.205744	NOT
ENSMUSG00000001440	6590	1563	1724	2285	2021	1513	1481	2168	1687	Kpnb1	25.8319	26.9183	34.0104	32.1414	23.1607	26.1634	34.7032	24.5712	1774.71	0.104204	0.100542	1.03642	0.300007	0.512689	NOT
ENSMUSG00000001441	7206	309	238	380	297	361	275	353	314	Npepps	4.67033	3.39843	5.1725	4.31963	5.05372	4.44287	5.16744	4.18246	313.745	-0.28038	0.146634	-1.91211	0.0558622	0.165147	NOT
ENSMUSG00000001444	2488	5	9	7	9	4	6	14	7	Tbx21	0.218878	0.37221	0.275968	0.37912	0.162184	0.280754	0.593571	0.27005	7.37897	0.538409	0.559928	0.961568	0.336267	0.549215	NOT
ENSMUSG00000001445	1708	305	430	524	442	404	317	398	470	Mrpl10	19.4489	25.9046	30.0923	27.1218	23.8612	21.6071	24.5805	26.4123	404.96	-0.00652602	0.146429	-0.0445678	0.964452	0.983549	NOT
ENSMUSG00000001467	4415	269	438	454	519	428	208	483	236	Cyp51	6.63597	10.208	10.0864	12.3203	9.77938	5.48476	11.5402	5.13072	368.921	0.456808	0.202219	2.25898	0.0238847	0.0887424	NOT
ENSMUSG00000001472	5390	1808	2177	2251	2006	2176	1875	2052	2543	Tcf25	36.5336	41.559	40.9636	39.0056	40.7257	40.4984	40.1591	45.285	2099.55	-0.257301	0.109088	-2.35865	0.0183413	0.0730921	NOT
ENSMUSG00000001473	2437	85	524	542	594	192	62	602	94	Tubb6	3.7988	22.1244	21.815	25.5455	7.94774	2.96184	26.0577	3.70228	313.011	2.12112	0.253048	8.38228	5.19e-17	1.82e-14	UP
ENSMUSG00000001482	4408	686	1025	846	818	843	746	669	901	Def8	16.9498	23.9264	18.8252	19.4489	19.2923	19.7026	16.0096	19.6191	814.868	-0.18506	0.167835	-1.10263	0.270188	0.480236	NOT
ENSMUSG00000001493	2228	2	1	1	1	0	0	2	1	Meox1	0.0977682	0.0461828	0.0440247	0.0470402	0	0	0.0946913	0.0430806	0.962378	0.448264	1.54065	0.290958	0.771084	NA	NOT
ENSMUSG00000001494	2066	0	0	0	0	1	0	3	0	Sost	0	0	0	0	0.0488279	0	0.153174	0	0.44407	0.931973	2.81248	0.331371	0.740365	NA	NOT
ENSMUSG00000001496	2842	0	0	0	0	0	0	0	0	Nkx2-1	0	0	0	0	0	0	0	0	0	NA	NA	NA	NA	NA	NA
ENSMUSG00000001497	5056	3	2	0	4	3	5	1	5	Pax9	0.0646245	0.0407023	0	0.0829158	0.0598566	0.11513	0.0208635	0.0949205	3.01823	-1.45531	0.956083	-1.52216	0.127969	0.29607	NOT
ENSMUSG00000001504	3282	0	0	0	0	0	0	0	0	Irx2	0	0	0	0	0	0	0	0	0	NA	NA	NA	NA	NA	NA
ENSMUSG00000001506	6563	287	364	960	752	199	144	977	132	Col1a1	4.7628	5.70682	14.3476	12.0088	3.05878	2.55438	15.7032	1.93049	443.354	1.68401	0.292076	5.76566	8.13e-09	4e-07	UP
ENSMUSG00000001507	5710	94	115	178	169	93	71	257	110	Itga3	1.79298	2.07232	3.0577	3.10195	1.64303	1.4476	4.7478	1.84907	129.802	0.675443	0.21373	3.16026	0.00157626	0.0106412	UP
ENSMUSG00000001508	1735	0	0	0	0	1	0	0	0	Sgca	0	0	0	0	0.0581432	0	0	0	0.131698	-1.0051	3.53381	-0.284424	0.776085	NA	NOT
ENSMUSG00000001510	2607	0	0	0	0	0	0	0	0	Dlx3	0	0	0	0	0	0	0	0	0	NA	NA	NA	NA	NA	NA
ENSMUSG00000001517	5754	15	72	68	53	36	9	110	16	Foxm1	0.283926	1.28753	1.15918	0.965362	0.631147	0.182095	2.01659	0.266899	43.9728	1.71679	0.361051	4.75498	1.98e-06	4.27e-05	UP
ENSMUSG00000001518	7096	110	161	143	115	135	110	122	136	Itfg2	1.68835	2.33457	1.97667	1.69851	1.91919	1.8047	1.8136	1.83959	128.145	-0.133025	0.180759	-0.735922	0.461778	0.662823	NOT
ENSMUSG00000001520	3757	8	5	11	5	9	6	15	4	Nrip2	0.231917	0.136938	0.287186	0.13948	0.241657	0.185924	0.421158	0.102192	7.67788	0.0996316	0.585525	0.170158	0.864886	0.934217	NOT
ENSMUSG00000001521	9342	32	63	75	47	34	13	102	32	Tulp3	0.373072	0.693899	0.787468	0.527281	0.367145	0.162005	1.15174	0.328781	46.8319	1.08812	0.305415	3.56274	0.000367005	0.00336399	UP
ENSMUSG00000001524	3313	113	127	119	124	146	158	110	150	Gtf2h4	3.71484	3.94437	3.5232	3.92269	4.44559	5.55215	3.50241	4.34577	132.191	-0.521576	0.184478	-2.82731	0.00469403	0.0253433	DOWN
ENSMUSG00000001525	3327	402	879	1103	957	525	305	1106	436	Tubb5	13.16	27.1851	32.5188	30.147	15.9186	10.6727	35.0669	12.5785	679.953	1.00007	0.135723	7.36849	1.73e-13	3.34e-11	UP
ENSMUSG00000001542	9828	1395	933	1243	1179	1121	1322	1058	1443	Ell2	15.4594	9.76814	12.4056	12.5728	11.5064	15.66	11.3557	14.0928	1221.86	-0.548023	0.140391	-3.90354	9.48e-05	0.00110511	DOWN
ENSMUSG00000001552	6436	481	834	848	759	698	552	890	698	Jup	8.13977	13.3335	12.9238	12.3598	10.9405	9.985	14.5871	10.4097	705.145	0.179862	0.122362	1.46992	0.141584	0.315783	NOT
ENSMUSG00000001555	2935	17	34	63	61	19	16	86	36	Fkbp10	0.630847	1.19197	2.10545	2.17824	0.653046	0.634654	3.0909	1.17731	38.8465	1.19186	0.329943	3.61233	0.000303458	0.00289169	UP
ENSMUSG00000001558	2161	1	0	1	2	0	0	1	0	Klhl10	0.0503997	0	0.0453896	0.0969973	0	0	0.0488136	0	0.589949	1.43137	2.02819	0.705739	0.480351	NA	NOT
ENSMUSG00000001566	2250	0	0	0	0	0	0	0	0	Mnx1	0	0	0	0	0	0	0	0	0	NA	NA	NA	NA	NA	NA
ENSMUSG00000001569	9232	287	442	421	381	382	280	343	374	Nom1	3.38586	4.92631	4.47299	4.32527	4.17413	3.53092	3.91917	3.88842	359.474	-0.00483515	0.15168	-0.0318774	0.97457	0.987234	NOT
ENSMUSG00000001576	8888	565	550	682	611	593	515	674	655	Ergic1	6.92353	6.36728	7.52648	7.20479	6.73052	6.74572	7.99928	7.0735	600.105	-0.16994	0.0966108	-1.75902	0.0785741	0.210677	NOT
ENSMUSG00000001583	3329	0	0	2	0	0	1	2	1	Tnk1	0	0	0.0589288	0	0	0.0349713	0.063374	0.0288326	0.70019	0.671235	1.9721	0.340366	0.733581	NA	NOT
ENSMUSG00000001588	4878	45	53	55	47	57	41	87	53	Acap1	1.00474	1.11797	1.10594	1.00981	1.17878	0.978515	1.88136	1.04287	53.642	0.0162633	0.241583	0.0673198	0.946327	0.974301	NOT
ENSMUSG00000001604	1400	293	125	368	210	165	251	240	357	Tcea3	22.7941	9.18708	25.7829	15.7208	11.8892	20.8723	18.0833	24.4758	250.271	-0.47647	0.279284	-1.70604	0.0880005	0.228818	NOT
ENSMUSG00000001622	4152	0	0	0	0	0	0	1	0	Csn3	0	0	0	0	0	0	0.0254061	0	0.104124	0.43757	3.53381	0.123824	0.901455	NA	NOT
ENSMUSG00000001627	5858	355	490	483	524	354	370	670	342	Ifrd1	6.60027	8.60681	8.08741	9.37489	6.0961	7.35322	12.0648	5.60368	438.717	0.313588	0.143565	2.1843	0.0289402	0.102575	NOT
ENSMUSG00000001630	4880	137	116	104	109	154	115	96	119	Stk38l	3.05762	2.44587	2.09038	2.34094	3.18346	2.74349	2.07514	2.34058	120.097	-0.58328	0.186015	-3.13566	0.00171466	0.0113483	DOWN
ENSMUSG00000001632	6779	266	346	278	284	295	210	313	329	Brpf1	4.27365	5.25177	4.02245	4.39073	4.3899	3.60644	4.8705	4.6583	287.171	-0.11631	0.149813	-0.77637	0.437531	0.642573	NOT
ENSMUSG00000001642	8384	42	124	174	150	57	62	246	79	Akr1b3	0.545608	1.52183	2.03568	1.8751	0.685838	0.860926	3.09513	0.904425	109.754	1.23956	0.230215	5.38438	7.27e-08	2.62e-06	UP
ENSMUSG00000001655	2461	0	0	0	0	0	0	0	0	Hoxc13	0	0	0	0	0	0	0	0	0	NA	NA	NA	NA	NA	NA
ENSMUSG00000001656	2021	0	0	0	0	0	0	0	0	Hoxc11	0	0	0	0	0	0	0	0	0	NA	NA	NA	NA	NA	NA
ENSMUSG00000001657	2832	0	0	0	0	0	0	0	0	Hoxc8	0	0	0	0	0	0	0	0	0	NA	NA	NA	NA	NA	NA
ENSMUSG00000001661	2408	0	0	1	0	0	0	0	0	Hoxc6	0	0	0.0407338	0	0	0	0	0	0.108064	0.43757	3.53381	0.123824	0.901455	NA	NOT
ENSMUSG00000001663	1528	825	1665	1678	1822	1074	770	1778	1071	Gstt1	58.8049	112.121	107.716	124.971	70.9054	58.6668	122.745	67.2764	1290.63	0.621911	0.112316	5.53716	3.07e-08	1.24e-06	UP
ENSMUSG00000001665	3842	180	580	281	199	202	221	393	340	Gstt3	5.10268	15.5334	7.17399	5.4285	5.30386	6.69669	10.7902	8.49412	292.689	0.367132	0.293113	1.25253	0.210377	0.410075	NOT
ENSMUSG00000001666	773	313	464	378	442	381	283	313	407	Ddt	44.1009	61.7638	47.9649	59.9276	49.7214	42.6218	42.713	50.5373	369.623	-0.0518083	0.178014	-0.291035	0.771025	0.879211	NOT
ENSMUSG00000001670	2405	28289	42128	16590	19658	28459	27613	14912	32258	Tat	1281.11	1802.4	676.617	856.66	1193.72	1336.67	654.058	1287.42	26718.9	-0.568977	0.392258	-1.45052	0.146914	0.322885	NOT
ENSMUSG00000001672	3284	13	18	34	26	22	10	40	21	Marveld3	0.431145	0.563981	1.01552	0.829764	0.675799	0.354505	1.28485	0.61378	21.9334	0.557323	0.363829	1.53183	0.125565	0.292477	NOT
ENSMUSG00000001674	2483	241	337	303	280	269	211	353	290	Ddx18	10.5712	13.9652	11.9695	11.8186	10.9288	9.89307	14.9966	11.2103	280.865	0.0563114	0.130665	0.430961	0.666496	0.813904	NOT
ENSMUSG00000001687	8098	710	1064	1062	1088	747	680	1149	901	Ubl3	9.54913	13.5195	12.8635	14.0811	9.30553	9.77589	14.9671	10.6793	905.357	0.245902	0.0984672	2.4973	0.0125145	0.0546944	NOT
ENSMUSG00000001700	5679	454	346	543	386	380	423	407	455	Gramd3	8.70697	6.26902	9.37863	7.1236	6.75009	8.67149	7.55993	7.69018	423.634	-0.319206	0.155327	-2.05506	0.0398731	0.129457	NOT
ENSMUSG00000001707	3257	87	143	113	113	98	82	109	72	Eef1e1	2.90927	4.51766	3.40308	3.63618	3.03533	2.93104	3.53024	2.12184	100.851	0.215268	0.20852	1.03236	0.301903	0.514655	NOT
ENSMUSG00000001729	4098	682	1000	1044	1042	982	693	1114	840	Akt1	18.1257	25.1087	24.9885	26.6489	24.1734	19.6873	28.6753	19.6745	908.079	0.117002	0.11928	0.980906	0.326639	0.539872	NOT
ENSMUSG00000001739	2124	0	5	12	3	5	6	13	3	Cldn15	0	0.242221	0.554164	0.14803	0.237473	0.328868	0.645631	0.13557	5.55417	0.912249	0.783448	1.1644	0.244261	0.450048	NOT
ENSMUSG00000001741	7865	42	70	64	62	63	49	77	49	Il16	0.581612	0.915788	0.798165	0.826185	0.808053	0.725308	1.03273	0.59799	58.4947	0.144754	0.220793	0.655611	0.512075	0.702837	NOT
ENSMUSG00000001750	4603	455	519	603	527	495	432	678	494	Tcirg1	10.766	11.6017	12.8495	11.9992	10.8483	10.9262	15.5376	10.3011	517.322	0.023119	0.105319	0.219515	0.826249	0.912669	NOT
ENSMUSG00000001751	2658	363	352	290	284	405	349	294	410	Naglu	14.8742	13.6265	10.7017	11.1982	15.3709	15.2861	11.6678	14.8056	346.734	-0.598668	0.139482	-4.29209	1.77e-05	0.000274738	DOWN
ENSMUSG00000001755	2867	1354	1007	1521	1281	1904	1348	1054	1811	Coasy	51.4368	36.1408	52.0371	46.828	66.9942	54.7378	38.78	60.63	1418.85	-0.673652	0.153557	-4.38699	1.15e-05	0.000191629	DOWN
ENSMUSG00000001761	5621	143	295	267	226	207	171	297	206	Smo	2.7708	5.40013	4.65918	4.21385	3.71497	3.54167	5.57363	3.51763	221.161	0.300394	0.156668	1.9174	0.0551876	0.163698	NOT
ENSMUSG00000001763	5195	113	89	92	117	120	98	83	146	Tspan33	2.36906	1.76279	1.73706	2.36039	2.3302	2.19617	1.68534	2.69752	107.934	-0.592377	0.190447	-3.11046	0.00186796	0.0121529	DOWN
ENSMUSG00000001767	3844	205	233	256	238	231	177	286	277	Crnkl1	5.80836	6.23689	6.53233	6.489	6.06215	5.36062	7.84834	6.91661	234.347	-0.0887295	0.131698	-0.673733	0.500481	0.693743	NOT
ENSMUSG00000001768	11271	456	486	507	497	489	423	581	487	Rin2	4.40641	4.43679	4.41222	4.62145	4.37668	4.36921	5.43762	4.14728	486.437	-0.125229	0.103406	-1.21105	0.225877	0.428157	NOT
ENSMUSG00000001768	11271	456	486	507	497	489	423	581	487	BC039771	4.40641	4.43679	4.41222	4.62145	4.37668	4.36921	5.43762	4.14728	486.437	-0.125229	0.103406	-1.21105	0.225877	0.428157	NOT
ENSMUSG00000001773	3210	1	3	2	1	1	0	1	1	Folh1	0.0339295	0.0961638	0.0611134	0.0326497	0.0314263	0	0.0328617	0.0299014	1.19777	0.974708	1.38553	0.703493	0.481748	NA	NOT
ENSMUSG00000001774	7498	327	189	511	385	353	238	350	230	Chordc1	4.74991	2.59365	6.68478	5.38145	4.74928	3.69536	4.924	2.94428	317.556	0.0206967	0.251803	0.0821938	0.934493	0.96841	NOT
ENSMUSG00000001783	2615	506	777	675	851	726	504	790	633	Rtcb	21.0747	30.5735	25.3188	34.1069	28.0068	22.438	31.8677	23.2343	671.89	0.114924	0.14487	0.793287	0.427611	0.635198	NOT
ENSMUSG00000001785	2942	159	277	230	264	237	144	258	228	Pwp1	5.88623	9.68797	7.66826	9.40471	8.1265	5.6983	9.25065	7.43856	220.187	0.15955	0.169925	0.938942	0.347761	0.56103	NOT
ENSMUSG00000001786	6180	181	162	168	166	159	165	191	208	Fbxo7	3.18987	2.69726	2.66644	2.81517	2.59541	3.10828	3.26017	3.23051	174.677	-0.33622	0.143687	-2.33994	0.0192867	0.0760682	NOT
ENSMUSG00000001794	2477	1110	1020	1371	1327	1034	959	1407	1048	Capns1	48.8068	42.3711	54.2904	56.1473	42.1107	45.0731	59.9188	40.6099	1143.91	0.0126553	0.119294	0.106085	0.915515	0.959336	NOT
ENSMUSG00000001802	4700	144	201	182	233	191	146	131	214	Lrp3	3.33693	4.40042	3.79826	5.19568	4.09953	3.61643	2.94014	4.37032	179.324	-0.151655	0.213903	-0.70899	0.478331	0.676083	NOT
ENSMUSG00000001804	3478	0	0	0	0	0	0	0	0	Dsg4	0	0	0	0	0	0	0	0	0	NA	NA	NA	NA	NA	NA
ENSMUSG00000001815	4191	0	0	0	0	0	0	0	0	Evx2	0	0	0	0	0	0	0	0	0	NA	NA	NA	NA	NA	NA
ENSMUSG00000001819	2483	0	0	0	0	0	0	0	0	Hoxd13	0	0	0	0	0	0	0	0	0	NA	NA	NA	NA	NA	NA
ENSMUSG00000001823	2534	0	0	0	0	0	0	0	0	Hoxd12	0	0	0	0	0	0	0	0	0	NA	NA	NA	NA	NA	NA
ENSMUSG00000001827	2297	0	2	1	2	1	1	6	1	Folr1	0	0.089591	0.0427022	0.0912543	0.0439174	0.0506832	0.275541	0.0417865	1.61783	1.57596	1.29801	1.21413	0.224699	NA	NOT
ENSMUSG00000001829	9960	381	375	618	469	444	314	507	520	Clpb	4.16628	3.87407	6.08612	4.93512	4.49699	3.67025	5.36962	5.01119	444.746	-0.029256	0.153146	-0.191033	0.848499	0.924813	NOT
ENSMUSG00000001833	11631	566	605	847	604	504	478	947	515	2022-09-07	5.30008	5.35222	7.14296	5.44257	4.37131	4.78449	8.58871	4.24998	617.778	0.24098	0.148882	1.6186	0.105534	0.259073	NOT
ENSMUSG00000001844	2864	204	282	239	196	220	204	267	295	Zdhhc4	7.75783	10.1314	8.18534	7.17245	7.74904	8.29244	9.83407	9.88658	236.27	-0.180299	0.162007	-1.11291	0.265747	0.474796	NOT
ENSMUSG00000001847	4496	1533	1602	1940	1803	1424	1376	2029	1575	Rac1	37.1363	36.6633	42.324	42.0294	31.9508	35.6301	47.6048	33.6241	1636.72	0.0312228	0.096173	0.324652	0.745444	0.864945	NOT
ENSMUSG00000001855	9659	234	307	258	232	211	217	276	236	Nup214	2.63856	3.27041	2.61999	2.51733	2.20368	2.61549	3.0142	2.34518	244.364	-0.0254361	0.153199	-0.166033	0.868131	0.9363	NOT
ENSMUSG00000001864	4032	3	6	12	4	3	3	24	4	Aif1l	0.0810371	0.153118	0.291926	0.103974	0.0750583	0.0866216	0.627893	0.0952218	6.76503	1.50531	0.70706	2.12897	0.0332564	0.11372	UP
ENSMUSG00000001865	1517	0	0	0	1	0	1	0	0	Cpa3	0	0	0	0.0690874	0	0.0767432	0	0	0.270884	-0.283771	3.23787	-0.0876412	0.930162	NA	NOT
ENSMUSG00000001870	10691	35	75	121	78	39	47	107	36	Ltbp1	0.35656	0.721836	1.11014	0.764646	0.367997	0.511805	1.05575	0.323207	64.2089	0.977429	0.240115	4.07067	4.69e-05	0.00061796	UP
ENSMUSG00000001891	3069	2800	2253	3103	2202	1991	2455	2801	2626	Ugp2	99.3675	75.537	99.1737	75.1977	65.4444	93.1279	96.2745	82.1287	2517.73	-0.229311	0.151669	-1.51192	0.130555	0.300158	NOT
ENSMUSG00000001901	3549	1	0	0	0	0	0	0	0	Kcnh6	0.0306886	0	0	0	0	0	0	0	0.142333	-1.0051	3.53381	-0.284424	0.776085	NA	NOT
ENSMUSG00000001909	6306	357	489	409	474	481	395	395	541	Trmt1	6.16591	7.97904	6.36181	7.87787	7.69466	7.29236	6.60752	8.23456	441.325	-0.26874	0.15752	-1.70607	0.0879956	0.228818	NOT
ENSMUSG00000001910	4673	352	502	576	601	539	336	629	439	Nacc1	8.20408	11.0536	12.0903	13.4792	11.6357	8.37083	14.1987	9.01707	485.64	0.194637	0.142935	1.36172	0.173287	0.361022	NOT
ENSMUSG00000001911	7351	1158	986	1063	1110	1135	1110	993	1499	Nfix	17.1571	13.8015	14.184	15.8256	15.5757	17.5793	14.2494	19.5728	1136.44	-0.513373	0.117066	-4.38532	1.16e-05	0.000192721	DOWN
ENSMUSG00000001918	4173	32	92	81	53	57	54	74	44	Slc1a5	0.835189	2.26848	1.90392	1.3311	1.37792	1.50651	1.87059	1.01205	59.562	0.397189	0.26825	1.48067	0.138696	0.311566	NOT
ENSMUSG00000001924	4819	2263	2177	2707	2145	2490	2001	2444	2428	Uba1	51.1459	46.4833	55.0989	46.6503	52.1243	48.341	53.4982	48.3603	2317.31	-0.23862	0.0940999	-2.53582	0.0112185	0.0501085	NOT
ENSMUSG00000001930	16064	238	339	384	400	328	185	436	198	Vwf	1.61364	2.17141	2.34471	2.6097	2.05977	1.34074	2.86304	1.18306	304.706	0.432475	0.179756	2.4059	0.0161328	0.0663132	NOT
ENSMUSG00000001942	10497	664	340	798	593	451	534	832	589	Siae	6.88947	3.3328	7.45674	5.92071	4.3342	5.92245	8.36091	5.38576	591.76	-0.116552	0.227133	-0.513145	0.60785	0.775195	NOT
ENSMUSG00000001943	1979	11	13	15	9	13	13	12	18	Vsig2	0.605383	0.675916	0.743459	0.47663	0.662667	0.764756	0.639633	0.873019	12.98	-0.444533	0.418998	-1.06094	0.288716	0.5004	NOT
ENSMUSG00000001946	2867	159	276	185	214	189	154	216	160	Esam	6.04022	9.90551	6.3293	7.82295	6.65016	6.25343	7.94733	5.3566	191.814	0.154765	0.185857	0.83271	0.405008	0.614761	NOT
ENSMUSG00000001948	1061	5	12	4	5	6	6	13	7	Spa17	0.51326	1.16375	0.369791	0.4939	0.570472	0.658356	1.29248	0.633256	7.10632	0.222101	0.602591	0.368577	0.712443	0.843552	NOT
ENSMUSG00000001962	2288	117	173	161	173	179	93	187	119	Fam50a	5.56946	7.78011	6.9021	7.92455	7.89215	4.73208	8.62146	4.99215	147.241	0.176493	0.192271	0.917936	0.358653	0.57151	NOT
ENSMUSG00000001964	2517	209	238	218	245	167	199	238	213	Emd	9.0437	9.72947	8.49542	10.2016	6.69316	9.20439	9.97445	8.12257	214.333	-0.0308283	0.15753	-0.195698	0.844847	0.922882	NOT
ENSMUSG00000001983	1383	205	177	246	193	220	185	193	251	Taco1	16.1441	13.1688	17.4472	14.6258	16.0472	15.5731	14.7208	17.42	208.095	-0.369302	0.142571	-2.5903	0.00958925	0.0446413	NOT
ENSMUSG00000001985	8973	0	3	0	0	2	0	0	0	Grik3	0	0.0344016	0	0	0.0224849	0	0	0	0.626522	0.385545	2.59752	0.148428	0.882005	NA	NOT
ENSMUSG00000001986	9859	40	94	158	195	36	63	194	43	Gria3	0.441886	0.981048	1.57194	2.07294	0.368356	0.743931	2.0757	0.418632	96.9642	1.50643	0.278429	5.41045	6.29e-08	2.3e-06	UP
ENSMUSG00000001988	3009	1	1	6	3	2	0	3	2	Npas1	0.036196	0.0341958	0.195587	0.104492	0.0670511	0	0.105171	0.0637977	2.08596	1.10905	1.10747	1.00142	0.316622	NA	NOT
ENSMUSG00000001995	9617	78	178	99	88	88	61	121	140	Sipa1l2	0.883361	1.90448	1.00973	0.959019	0.923084	0.73844	1.32721	1.39729	104.407	0.160189	0.276399	0.579558	0.562212	0.740813	NOT
ENSMUSG00000001998	9810	138	129	180	155	113	135	186	132	Ap4e1	1.53212	1.35306	1.79976	1.65595	1.162	1.6021	2.00004	1.29152	144.069	0.0310003	0.170756	0.181547	0.855938	0.929498	NOT
ENSMUSG00000001999	2446	115	136	140	160	101	104	203	122	Blvra	5.12064	5.72108	5.61414	6.85564	4.16546	4.94996	8.75457	4.78741	132.124	0.243333	0.173309	1.40404	0.160306	0.342147	NOT
ENSMUSG00000002006	3970	11	14	18	12	1	4	20	7	Pdzd4	0.301776	0.362855	0.444727	0.316793	0.0254102	0.117299	0.531416	0.169241	10.3033	1.18003	0.560623	2.10486	0.0353038	0.118881	UP
ENSMUSG00000002007	2784	6	13	3	2	4	1	6	9	Srpk3	0.234728	0.480474	0.105697	0.0752913	0.14494	0.0418173	0.227341	0.310292	5.39567	0.0378182	0.788765	0.047946	0.961759	0.982509	NOT
ENSMUSG00000002010	2701	614	704	995	694	656	691	807	874	Idh3g	24.7586	26.8191	36.1335	26.9289	24.5006	29.7837	31.517	31.0587	745.277	-0.109576	0.138771	-0.789618	0.429751	0.636751	NOT
ENSMUSG00000002012	1971	3	1	5	1	1	0	7	3	Pnck	0.165774	0.0522046	0.248826	0.0531738	0.0511813	0	0.374634	0.146094	2.43457	0.699857	1.08728	0.643677	0.519785	NA	NOT
ENSMUSG00000002014	3096	601	833	743	915	933	604	696	771	Ssr4	21.1425	27.6847	23.5396	30.9745	30.4004	22.7123	23.7139	23.9029	756.788	-0.131383	0.168308	-0.780611	0.435031	0.641022	NOT
ENSMUSG00000002015	1219	1091	1069	1237	1187	1056	872	1073	1103	Bcap31	97.4774	90.2338	99.5354	102.054	87.3893	83.2795	92.852	86.8498	1077.72	-0.130671	0.112914	-1.15726	0.247168	0.453473	NOT
ENSMUSG00000002017	3564	312	307	508	342	331	272	454	291	Fam98a	9.53454	8.86331	13.981	10.0571	9.3689	8.88498	13.4373	7.83704	344.938	0.121128	0.157231	0.770385	0.441072	0.645524	NOT
ENSMUSG00000002020	8184	27	35	88	44	25	21	86	19	Ltbp2	0.35932	0.440046	1.0547	0.563471	0.308157	0.29873	1.10848	0.222836	40.5624	1.146	0.334437	3.42665	0.000611081	0.00505943	UP
ENSMUSG00000002028	16670	616	747	854	765	631	663	1125	776	Kmt2a	4.02465	4.61084	5.02497	4.80961	3.81849	4.63024	7.11889	4.4681	757.398	0.0862253	0.131591	0.655253	0.512305	0.702965	NOT
ENSMUSG00000002031	6416	249	287	360	378	262	260	385	347	Ift46	4.22686	4.6027	5.50364	6.17464	4.11941	4.71774	6.32982	5.19113	310.553	0.0545795	0.136798	0.398978	0.689909	0.82987	NOT
ENSMUSG00000002032	3212	235	92	218	113	228	259	136	308	Tmem25	7.96848	2.94719	6.65721	3.68712	7.16073	9.38749	4.46641	9.2039	203.077	-1.1784	0.223571	-5.2708	1.36e-07	4.41e-06	DOWN
ENSMUSG00000002033	3269	16	24	17	17	10	3	22	13	Cd3g	0.533075	0.755426	0.510089	0.545027	0.308591	0.106839	0.70991	0.381703	14.6822	0.665269	0.453954	1.4655	0.142785	0.317203	NOT
ENSMUSG00000002043	1589	114	156	132	169	136	90	154	104	Trappc6a	7.81383	10.1017	8.1482	11.1467	8.63402	6.59392	10.2233	6.28212	129.753	0.185301	0.185535	0.998739	0.317921	0.530709	NOT
ENSMUSG00000002052	7095	748	921	956	902	986	651	903	946	Supt6	11.4824	13.3568	13.2165	13.3241	14.0192	10.682	13.4255	12.7978	867.045	-0.124566	0.120979	-1.02965	0.303174	0.515902	NOT
ENSMUSG00000002055	5624	10	67	63	44	28	11	81	8	Spag5	0.193659	1.22582	1.09877	0.819958	0.502239	0.227705	1.51927	0.136534	36.3082	1.87507	0.374718	5.00395	5.62e-07	1.48e-05	UP
ENSMUSG00000002057	3214	0	0	0	0	0	0	1	0	Foxn1	0	0	0	0	0	0	0.0328208	0	0.104124	0.43757	3.53381	0.123824	0.901455	NA	NOT
ENSMUSG00000002058	2448	233	226	573	286	284	183	584	216	Unc119	10.3664	9.49932	22.9591	12.2444	11.7032	8.70292	25.165	8.46914	308.838	0.555943	0.255393	2.17682	0.0294944	0.10397	UP
ENSMUSG00000002059	2385	126	132	156	131	143	103	168	127	Rab34	5.75394	5.69483	6.41576	5.75661	6.04847	5.02775	7.43047	5.11107	133.868	-0.050062	0.155733	-0.32146	0.747862	0.866381	NOT
ENSMUSG00000002064	1515	193	218	255	245	266	202	206	284	Sdf2	13.8748	14.8061	16.5097	16.9488	17.712	15.5226	14.3433	17.993	232.506	-0.302106	0.153298	-1.97071	0.0487571	0.150201	NOT
ENSMUSG00000002068	2662	14	42	26	23	12	9	53	14	Ccne1	0.5728	1.62344	0.958025	0.905532	0.454749	0.393604	2.10021	0.504797	22.788	1.27207	0.387041	3.28665	0.00101388	0.00756695	UP
ENSMUSG00000002076	3589	2	3	8	6	2	0	13	2	Hsf2bp	0.0606931	0.0860089	0.218639	0.175211	0.0562153	0	0.38209	0.0534876	4.08088	2.02983	0.889925	2.2809	0.0225542	0.0850743	UP
ENSMUSG00000002083	2124	50	85	99	206	63	80	92	80	Bbc3	2.56388	4.11775	4.57185	10.1648	2.99216	4.38491	4.56908	3.6152	92.2942	0.548346	0.313773	1.74759	0.0805356	0.214584	NOT
ENSMUSG00000002100	4163	0	1	1	6	1	1	4	3	Mybpc3	0	0.0247166	0.0235616	0.151053	0.0242321	0.0279653	0.101356	0.069169	2.00469	1.01658	1.18476	0.858044	0.390868	NA	NOT
ENSMUSG00000002102	2607	1092	1119	1475	1414	1340	957	1168	1379	Psmc3	45.621	44.1656	55.4961	56.845	51.8516	42.7362	47.2604	50.7715	1230.52	-0.152411	0.132592	-1.14947	0.250361	0.457044	NOT
ENSMUSG00000002103	5186	672	634	776	699	673	623	785	728	Acp2	14.113	12.5792	14.6771	14.1263	13.0912	13.9856	15.9673	13.474	693.608	-0.183923	0.096369	-1.90853	0.0563228	0.166072	NOT
ENSMUSG00000002104	1802	0	1	3	0	0	0	1	0	Rapsn	0	0.0571006	0.163297	0	0	0	0.0585383	0	0.549358	2.45266	2.24404	1.09297	0.274407	NA	NOT
ENSMUSG00000002105	4869	150	176	236	215	203	174	200	224	Slc39a13	3.35532	3.71936	4.75427	4.62789	4.20586	4.1604	4.33297	4.41576	195.148	-0.13825	0.153109	-0.902949	0.366553	0.57924	NOT
ENSMUSG00000002107	25884	370	393	361	336	378	332	499	424	Celf2	1.55687	1.56227	1.368	1.36048	1.47319	1.49325	2.03359	1.57229	383.389	-0.204724	0.133908	-1.52884	0.126305	0.29355	NOT
ENSMUSG00000002108	2515	832	770	1044	784	1049	844	836	1124	Nr1h3	36.0303	31.5027	40.7168	32.671	42.0761	39.0688	35.0642	42.8968	909.056	-0.442777	0.120961	-3.66049	0.000251733	0.00248606	NOT
ENSMUSG00000002109	2736	54	49	75	63	51	47	74	66	Ddb2	2.14961	1.84279	2.68879	2.41329	1.88041	1.99989	2.85306	2.31539	58.8531	-0.0247957	0.215204	-0.11522	0.908271	0.956263	NOT
ENSMUSG00000002111	2695	93	300	239	252	156	106	326	145	Spi1	3.75844	11.454	8.69863	9.8	5.83934	4.57902	12.7601	5.16424	193.55	0.888378	0.180658	4.91745	8.77e-07	2.15e-05	UP
ENSMUSG00000002129	6147	294	333	445	397	349	289	407	302	Sf3a1	5.20915	5.57412	7.10082	6.7688	5.72744	5.47343	6.98436	4.71564	346.619	0.0712045	0.128976	0.552076	0.580896	0.755774	NOT
ENSMUSG00000002147	4402	827	663	1122	1017	881	743	1003	877	Stat6	20.4615	15.4974	25.0008	24.2134	20.1894	19.6501	24.0351	19.1226	880.75	-0.0960523	0.144292	-0.665678	0.505617	0.697641	NOT
ENSMUSG00000002190	4025	0	0	0	0	0	0	0	0	Clgn	0	0	0	0	0	0	0	0	0	NA	NA	NA	NA	NA	NA
ENSMUSG00000002204	2660	11	20	18	19	10	10	21	13	Napsa	0.450396	0.773649	0.663747	0.748611	0.379242	0.437667	0.832785	0.469093	14.7979	0.547084	0.389956	1.40294	0.160636	0.342677	NOT
ENSMUSG00000002205	6744	291	249	422	364	299	278	346	330	Vrk3	4.69957	3.79907	6.13771	5.65676	4.47251	4.79902	5.41195	4.6967	318.468	-0.082621	0.152779	-0.540788	0.588653	0.761396	NOT
ENSMUSG00000002210	3702	83	125	162	180	102	94	156	128	Smg9	2.44188	3.47431	4.2923	5.09589	2.77947	2.95608	4.44512	3.31872	125.412	0.338383	0.179234	1.88795	0.0590331	0.171899	NOT
ENSMUSG00000002221	10271	238	279	286	271	270	249	282	307	Paxip1	2.52376	2.79503	2.73127	2.76529	2.65185	2.82236	2.89622	2.86895	271.165	-0.206608	0.122827	-1.68211	0.0925474	0.237023	NOT
ENSMUSG00000002222	6783	2648	2773	2952	2697	2238	2487	2753	3076	Rmnd5a	42.5186	42.0653	42.688	41.6719	33.2841	42.6854	42.8134	43.5273	2688.61	-0.18381	0.11785	-1.55969	0.118833	0.281642	NOT
ENSMUSG00000002227	5607	328	240	352	253	274	280	325	351	Mov10	6.37127	4.40429	6.15777	4.72905	4.92967	5.8137	6.11432	6.0086	299.417	-0.366277	0.145568	-2.51619	0.011863	0.0524318	NOT
ENSMUSG00000002228	1814	7	7	11	7	6	2	9	6	Ppm1j	0.420285	0.39706	0.594795	0.404432	0.333666	0.128357	0.52336	0.317476	6.62583	0.417527	0.589952	0.707731	0.479112	0.676585	NOT
ENSMUSG00000002233	1618	134	296	420	424	243	117	375	139	Rhoc	9.02006	18.8239	25.4614	27.4645	15.1505	8.41846	24.4483	8.24581	256.216	0.982833	0.214109	4.59035	4.43e-06	8.47e-05	UP
ENSMUSG00000002240	1337	0	0	0	0	0	0	0	0	Prr27	0	0	0	0	0	0	0	0	0	NA	NA	NA	NA	NA	NA
ENSMUSG00000002249	6714	161	199	150	172	189	153	179	178	Tead3	2.61173	3.04977	2.1914	2.68492	2.83974	2.65299	2.81233	2.54469	172.254	-0.235181	0.162487	-1.44738	0.147789	0.324043	NOT
ENSMUSG00000002250	7514	136	136	153	129	169	100	162	156	Ppard	1.97129	1.86236	1.99725	1.7993	2.26889	1.54937	2.27425	1.99274	141.112	-0.228026	0.163933	-1.39097	0.164234	0.3478	NOT
ENSMUSG00000002250	7514	136	136	153	129	169	100	162	156	1810013A23Rik	1.97129	1.86236	1.99725	1.7993	2.26889	1.54937	2.27425	1.99274	141.112	-0.228026	0.163933	-1.39097	0.164234	0.3478	NOT
ENSMUSG00000002257	2672	7	19	14	15	14	7	11	17	Def6	0.285328	0.731666	0.513929	0.588354	0.528554	0.304991	0.434262	0.610674	12.721	0.142578	0.455491	0.31302	0.754266	0.869616	NOT
ENSMUSG00000002265	13616	798	693	909	527	1329	1015	1434	1212	Peg3	6.38317	5.23696	6.54826	4.05644	9.84631	8.67844	11.1095	8.54378	986.182	-0.590679	0.234817	-2.51548	0.0118869	0.0525238	DOWN
ENSMUSG00000002266	8086	3	3	12	2	3	4	20	1	Zim1	0.0404083	0.0381753	0.145566	0.0259227	0.0374271	0.0575906	0.26091	0.0118703	5.53522	1.38893	0.839163	1.65513	0.0978974	0.246013	NOT
ENSMUSG00000002274	3771	45	42	36	46	45	32	35	49	Metrn	1.29969	1.14601	0.936392	1.27846	1.2038	0.987913	0.979054	1.2472	41.2756	-0.374023	0.257236	-1.45401	0.145945	0.321719	NOT
ENSMUSG00000002279	13589	336	309	306	274	304	286	240	384	Lmf1	2.69299	2.33973	2.20874	2.11323	2.25675	2.45021	1.86303	2.71232	306.475	-0.486802	0.15215	-3.19949	0.00137673	0.00957405	NOT
ENSMUSG00000002280	6223	225	346	376	308	301	274	337	352	Ciao3	3.93791	5.721	5.92652	5.18723	4.87938	5.12597	5.71249	5.42925	310.664	-0.0284949	0.141634	-0.201187	0.840553	0.921177	NOT
ENSMUSG00000002289	3541	2582	4420	3565	4540	3749	2736	3820	3976	Angptl4	79.417	128.437	98.7518	134.374	106.804	89.9529	113.797	107.775	3620.38	0.0670746	0.156001	0.429961	0.667224	0.813967	NOT
ENSMUSG00000002297	8728	28	110	119	101	43	21	174	36	Dbf4	0.349403	1.2968	1.33735	1.2128	0.496995	0.280111	2.10295	0.395899	73.461	1.6953	0.246087	6.88901	5.62e-12	6.91e-10	UP
ENSMUSG00000002307	3151	222	213	243	268	190	186	215	219	Daxx	7.6734	6.95547	7.56431	8.91396	6.0828	6.8721	7.19756	6.67103	217.945	-0.0794677	0.155529	-0.51095	0.609386	0.776039	NOT
ENSMUSG00000002308	2883	20	41	53	45	40	22	43	37	Cd320	0.755559	1.4633	1.8032	1.63588	1.39963	0.888389	1.57333	1.23184	36.4867	0.34424	0.281056	1.22481	0.220646	0.42228	NOT
ENSMUSG00000002319	4669	194	186	231	215	236	167	211	206	Ipo4	4.52544	4.09906	4.85288	4.82613	5.09901	4.16407	4.7671	4.23487	204.293	-0.209787	0.141333	-1.48434	0.137718	0.310363	NOT
ENSMUSG00000002320	3880	469	542	502	539	555	461	530	604	Tm9sf1	13.1651	14.3735	12.6906	14.5593	14.4298	13.8323	14.4092	14.9418	523.021	-0.256206	0.115935	-2.20991	0.0271113	0.097486	NOT
ENSMUSG00000002324	2935	10	9	7	5	13	8	9	8	Rec8	0.371086	0.315522	0.233938	0.178544	0.446821	0.317327	0.323467	0.261625	8.71343	-0.662793	0.515396	-1.28599	0.198447	0.394214	NOT
ENSMUSG00000002325	5386	427	359	469	495	436	361	338	468	Irf9	8.63465	6.85841	8.54118	9.63215	8.16617	7.80308	6.61981	8.3402	418.487	-0.300353	0.16111	-1.86427	0.0622833	0.178617	NOT
ENSMUSG00000002326	3925	48	42	87	50	39	50	66	52	Gmpr2	1.33194	1.10105	2.17416	1.3351	1.00236	1.48305	1.77378	1.27163	53.2474	0.0746682	0.260926	0.286166	0.774751	0.881253	NOT
ENSMUSG00000002329	2032	125	161	151	171	150	94	130	139	Mdp1	6.69992	8.15263	7.28895	8.81976	7.44673	5.38554	6.74862	6.56581	138.462	0.00550682	0.185119	0.0297475	0.976268	0.987461	NOT
ENSMUSG00000002332	2760	1272	685	1287	939	1039	962	905	1261	Dhrs1	50.1951	25.5374	45.7384	35.6567	37.9756	40.5781	34.5887	43.8534	1046.64	-0.53827	0.170279	-3.1611	0.00157175	0.0106192	DOWN
ENSMUSG00000002341	7195	0	0	0	1	0	0	0	0	Ncan	0	0	0	0.0145664	0	0	0	0	0.117714	0.43757	3.53381	0.123824	0.901455	NA	NOT
ENSMUSG00000002342	3673	191	256	213	266	266	178	217	245	Tmem161a	5.66364	7.17157	5.68814	7.59006	7.30565	5.64189	6.23209	6.40239	227.441	-0.150756	0.170078	-0.886398	0.375403	0.58752	NOT
ENSMUSG00000002343	3262	41	70	69	74	58	32	72	51	Armc6	1.36894	2.20805	2.0748	2.37756	1.79367	1.14207	2.32833	1.50066	56.7675	0.376509	0.224732	1.67537	0.0938626	0.23919	NOT
ENSMUSG00000002345	1468	90	108	142	149	104	85	119	90	Borcs8	6.67728	7.56995	9.48798	10.6376	7.1467	6.7409	8.55098	5.88455	108.912	0.20724	0.184326	1.12431	0.260882	0.469343	NOT
ENSMUSG00000002346	5996	2250	1515	2250	1633	2116	2275	1359	3112	Slc25a42	40.8699	25.9984	36.8072	28.5436	35.6002	44.1718	23.9085	49.8167	2089.31	-0.805917	0.169866	-4.74444	2.09e-06	4.47e-05	DOWN
ENSMUSG00000002365	3617	666	742	788	583	682	774	699	1122	Snx9	20.0544	21.1082	21.3693	16.8929	19.021	24.9125	20.3856	29.7743	757.15	-0.478794	0.164591	-2.909	0.00362592	0.0205729	NOT
ENSMUSG00000002372	6960	285	421	450	427	416	246	412	385	Ranbp3	4.45983	6.22398	6.34183	6.42988	6.02951	4.11482	6.24429	5.30944	373	0.0943172	0.148448	0.635354	0.525198	0.713397	NOT
ENSMUSG00000002379	1092	239	452	244	402	341	191	354	277	Ndufa11	23.8374	42.5904	21.9169	38.5823	31.5014	20.3627	34.196	24.3475	307.414	0.215365	0.223567	0.963313	0.33539	0.548421	NOT
ENSMUSG00000002384	3880	3	6	63	44	2	6	27	0	Bmp8b	0.0842117	0.159116	1.59265	1.18852	0.0519992	0.18003	0.734053	0	17.1345	3.32158	0.746223	4.45119	8.54e-06	0.000147794	UP
ENSMUSG00000002393	2983	432	642	490	744	783	456	482	536	Nr2f6	15.773	22.1451	16.1122	26.1399	26.4793	17.7966	17.0447	17.2468	568.617	-0.162277	0.219634	-0.738852	0.459997	0.661336	NOT
ENSMUSG00000002395	2203	377	401	437	402	495	367	412	575	Use1	18.6385	18.7295	19.4571	19.1248	22.6667	19.3944	19.7278	25.0525	431.566	-0.403182	0.130245	-3.09556	0.00196442	0.0126583	NOT
ENSMUSG00000002396	7133	226	176	286	244	243	207	238	292	Ocel1	3.4508	2.53884	3.93283	3.5851	3.43662	3.3785	3.51965	3.92923	237.402	-0.317011	0.152931	-2.07291	0.0381808	0.125559	NOT
ENSMUSG00000002409	2695	167	194	176	230	181	161	198	186	Dyrk1b	6.74902	7.40693	6.40568	8.94444	6.77513	6.95492	7.75	6.62447	185.271	-0.0773429	0.155955	-0.495929	0.619944	0.783977	NOT
ENSMUSG00000002413	13862	563	554	534	397	451	472	574	607	Braf	4.42349	4.11225	3.77857	3.00157	3.28208	3.96407	4.36799	4.203	517.534	-0.307605	0.149448	-2.05827	0.0395643	0.128678	NOT
ENSMUSG00000002416	5628	116	108	127	143	107	88	116	87	Ndufb2	2.24485	1.97454	2.21341	2.66297	1.91791	1.82035	2.1742	1.48375	110.459	0.0264897	0.195421	0.135552	0.892175	0.948485	NOT
ENSMUSG00000002428	5931	161	141	214	172	115	156	221	163	Hltf	2.95652	2.44617	3.53914	3.03938	1.956	3.06212	3.93061	2.63789	165.397	0.0304484	0.186414	0.163338	0.870253	0.937191	NOT
ENSMUSG00000002455	3859	722	626	672	581	799	618	582	826	Prpf6	20.3772	16.6915	17.0807	15.7792	20.8867	18.644	15.909	20.5448	681.337	-0.543331	0.112159	-4.84429	1.27e-06	2.96e-05	DOWN
ENSMUSG00000002458	2230	19	36	86	55	35	35	75	38	Rgs19	0.927965	1.66109	3.78273	2.58489	1.58329	1.82721	3.54774	1.63559	45.2698	0.692347	0.305549	2.26591	0.0234569	0.0874872	UP
ENSMUSG00000002459	4239	1	2	0	0	0	0	3	1	Rgs20	0.0256933	0.048547	0	0	0	0	0.074654	0.022643	0.819433	1.03468	1.90952	0.541852	0.587921	NA	NOT
ENSMUSG00000002475	2334	678	448	587	474	796	633	356	782	Abhd3	31.6382	19.7503	24.6688	21.2844	34.4041	31.5739	16.0896	32.159	604.723	-0.905558	0.161144	-5.61956	1.91e-08	8.34e-07	DOWN
ENSMUSG00000002477	2052	82	138	167	144	96	109	193	140	Snrpd1	4.35231	6.91986	7.98272	7.35478	4.71946	6.18407	9.92145	6.54859	129.977	0.304157	0.181743	1.67356	0.0942174	0.239732	NOT
ENSMUSG00000002486	7397	16	46	40	45	43	25	41	29	Tchp	0.235585	0.639879	0.530415	0.637589	0.586423	0.393468	0.584687	0.376304	34.783	0.337955	0.308523	1.0954	0.273342	0.484106	NOT
ENSMUSG00000002489	10048	28	19	57	34	34	15	58	35	Tiam1	0.303502	0.194567	0.556425	0.354637	0.341348	0.173795	0.608897	0.334338	33.5541	0.296942	0.358025	0.829389	0.406884	0.616392	NOT
ENSMUSG00000002496	9620	645	495	725	511	649	575	654	773	Tsc2	7.30243	5.29451	7.39221	5.56711	6.80562	6.95854	7.1713	7.71261	626.665	-0.433774	0.124271	-3.49056	0.000482011	0.0041926	NOT
ENSMUSG00000002500	1643	0	4	3	0	0	1	3	1	Rpl3l	0	0.250506	0.1791	0	0	0.0708578	0.19261	0.0584197	1.39655	2.04288	1.53872	1.32765	0.184294	NA	NOT
ENSMUSG00000002504	2646	147	239	345	268	235	176	319	199	Slc9a3r2	6.05077	9.29402	12.7891	10.6152	8.95934	7.74369	12.7173	7.21872	234.21	0.343908	0.160743	2.13949	0.0323964	0.111405	NOT
ENSMUSG00000002524	4748	569	833	769	830	744	527	738	700	Puf60	13.0522	18.0522	15.8865	18.3211	15.8074	12.9219	16.3961	14.1509	704.018	0.051784	0.132551	0.390673	0.696039	0.83403	NOT
ENSMUSG00000002546	5500	465	627	688	604	666	473	639	645	Golga2	9.20817	11.7301	12.2698	11.5096	12.2155	10.0121	12.2556	11.2563	593.326	-0.0866999	0.123844	-0.700072	0.483882	0.679904	NOT
ENSMUSG00000002550	2751	412	537	615	595	550	304	425	658	Uck1	16.3113	20.0853	21.9279	22.6679	20.1683	12.865	16.2965	22.9579	504.09	-0.0739098	0.198928	-0.371541	0.710235	0.842443	NOT
ENSMUSG00000002565	2999	0	0	1	0	1	0	0	0	Scin	0	0	0.0327066	0	0.0336373	0	0	0	0.239762	-0.283769	3.37626	-0.0840484	0.933018	NA	NOT
ENSMUSG00000002578	6461	11	12	23	8	15	8	22	13	Ikzf4	0.185428	0.191107	0.349172	0.12977	0.234201	0.14415	0.359185	0.193126	13.5313	0.176316	0.448556	0.393074	0.694265	0.832974	NOT
ENSMUSG00000002580	747	43	87	41	120	110	24	46	41	Mien1	6.26947	11.9838	5.38363	16.8362	14.8549	3.74038	6.4958	5.26817	63.1882	0.203825	0.44488	0.458157	0.64684	0.800395	NOT
ENSMUSG00000002588	2898	7761	5660	5870	3619	7150	7581	3925	9459	Pon1	291.677	200.962	198.679	130.88	248.889	304.546	142.869	313.288	6521.69	-1.01977	0.179192	-5.69091	1.26e-08	5.84e-07	DOWN
ENSMUSG00000002602	5033	460	892	1072	1064	667	450	1432	585	Axl	9.95437	18.2362	20.892	22.1564	13.3689	10.409	30.0131	11.1564	792.156	0.760691	0.145835	5.21609	1.83e-07	5.72e-06	UP
ENSMUSG00000002603	5042	162	263	279	319	229	150	377	173	Tgfb1	3.49941	5.36721	5.42766	6.63089	4.58174	3.46349	7.8874	3.29337	236.199	0.51079	0.164195	3.11088	0.00186529	0.0121449	UP
ENSMUSG00000002608	3939	243	280	401	316	303	237	341	288	Ccdc97	6.71898	7.31421	9.9855	8.40786	7.75988	7.00467	9.13195	7.01784	296.044	0.0375993	0.133102	0.282484	0.777572	0.88278	NOT
ENSMUSG00000002617	4482	21	61	80	66	24	16	87	38	Zfp40	0.510306	1.4004	1.75077	1.54332	0.540179	0.415598	2.04759	0.813783	46.1175	1.29708	0.264951	4.89553	9.8e-07	2.37e-05	UP
ENSMUSG00000002625	5073	273	328	308	275	373	298	395	357	Akap8l	5.86112	6.6528	5.95521	5.68136	7.41724	6.83875	8.21349	6.75461	323.895	-0.276293	0.140751	-1.96299	0.0496478	0.152211	NOT
ENSMUSG00000002633	2847	0	2	0	0	1	0	0	0	Shh	0	0.0722833	0	0	0.0354332	0	0	0	0.373782	0.491043	2.96968	0.165352	0.868667	NA	NOT
ENSMUSG00000002635	1549	105	116	115	121	105	89	119	96	Pdcd2l	7.3828	7.70552	7.28212	8.18688	6.83811	6.68904	8.10384	5.94863	107.282	-0.0283781	0.169966	-0.166963	0.867399	0.935851	NOT
ENSMUSG00000002658	1717	128	225	173	255	215	121	183	176	Gtf2f1	8.11938	13.4837	9.88297	15.5652	12.6318	8.20428	11.2428	9.83873	181.654	0.129136	0.214877	0.600977	0.547855	0.729709	NOT
ENSMUSG00000002660	1223	415	413	406	467	484	395	365	473	Clpp	36.9577	34.7471	32.562	40.0198	39.9224	37.6007	31.482	37.122	428.165	-0.370463	0.139743	-2.65103	0.00802477	0.0388717	NOT
ENSMUSG00000002661	1029	71	99	69	86	90	69	68	78	Alkbh7	7.51495	9.89955	6.57726	8.75926	8.82318	7.80655	6.9709	7.27572	78.7368	-0.204575	0.223347	-0.915951	0.359692	0.572449	NOT
ENSMUSG00000002664	474	1	3	1	3	2	1	3	1	Pspn	0.229776	0.651236	0.206935	0.663326	0.425647	0.24561	0.667634	0.202497	1.81825	0.729105	1.10387	0.660501	0.508932	NA	NOT
ENSMUSG00000002668	5109	72	81	92	73	98	76	112	74	Dennd1c	1.5349	1.63134	1.7663	1.49752	1.93503	1.73182	2.31248	1.39025	83.8722	-0.129167	0.200002	-0.645826	0.518392	0.708179	NOT
ENSMUSG00000002679	1447	86	102	124	91	110	103	124	106	Med6	6.47311	7.25316	8.40552	6.59109	7.66871	8.28694	9.03958	7.03128	104.874	-0.165595	0.17549	-0.943616	0.345366	0.558825	NOT
ENSMUSG00000002688	3653	3	7	1	2	4	4	7	3	Prkd1	0.0894447	0.197171	0.0268511	0.0573805	0.110461	0.127478	0.202136	0.0788258	3.85406	-0.00698361	0.818707	-0.00853005	0.993194	0.996564	NOT
ENSMUSG00000002699	4459	138	215	220	165	133	105	286	147	Lcp2	3.37074	4.96131	4.83946	3.8782	3.00893	2.74143	6.76587	3.16429	170.27	0.474635	0.172315	2.75446	0.00587891	0.0303923	NOT
ENSMUSG00000002718	5273	417	449	571	449	346	382	573	482	Cse1l	8.61314	8.76161	10.6216	8.92427	6.61937	8.43395	11.4628	8.77377	451.115	0.0395877	0.131718	0.300548	0.763759	0.875234	NOT
ENSMUSG00000002728	3705	150	286	317	291	151	137	365	188	Naa20	4.40947	7.94279	8.39233	8.23169	4.11137	4.30485	10.392	4.87042	226.412	0.726383	0.130791	5.55378	2.8e-08	1.14e-06	UP
ENSMUSG00000002731	2028	139	94	184	131	124	174	145	212	Prkra	7.465	4.76931	8.89941	6.76998	6.16811	9.98864	7.54215	10.0338	150.547	-0.520677	0.219399	-2.3732	0.0176349	0.0708128	DOWN
ENSMUSG00000002732	1485	24	40	44	30	27	25	51	20	Fkbp7	1.76022	2.77159	2.90628	2.11728	1.83415	1.95992	3.62275	1.29271	31.6922	0.486006	0.292031	1.66423	0.0960669	0.242878	NOT
ENSMUSG00000002733	3126	261	310	314	327	218	207	330	264	Plekha3	9.09357	10.2039	9.85263	10.9633	7.03502	7.70915	11.1358	8.1061	274.252	0.151118	0.133385	1.13294	0.257239	0.465208	NOT
ENSMUSG00000002741	2984	662	809	977	913	829	652	879	864	Ykt6	24.1625	27.8962	32.115	32.0668	28.0255	25.4375	31.0732	27.7915	811.733	-0.0246827	0.107551	-0.229497	0.818483	0.907589	NOT
ENSMUSG00000002748	13667	867	854	1047	1033	942	685	1157	916	Baz1b	6.90922	6.42954	7.51424	7.92157	6.95306	5.83502	8.93008	6.43308	923.308	-0.0192452	0.110202	-0.174635	0.861366	0.932209	NOT
ENSMUSG00000002763	3796	843	562	806	838	1072	825	581	963	Pex6	24.1871	15.2337	20.8267	23.1367	28.4883	25.3019	16.1453	24.3499	819.904	-0.686406	0.163907	-4.18777	2.82e-05	0.000402779	DOWN
ENSMUSG00000002767	1170	301	362	295	344	442	262	310	327	Mrpl2	28.0197	31.836	24.7313	30.8146	38.1096	26.07	27.9493	26.8262	329.756	-0.289902	0.174605	-1.66033	0.0968482	0.244177	NOT
ENSMUSG00000002768	1844	134	207	230	245	271	145	174	267	Mea1	7.91456	11.5506	12.2343	13.9248	14.8254	9.15445	9.95368	13.8978	206.586	-0.183157	0.225368	-0.812699	0.41639	0.624355	NOT
ENSMUSG00000002769	1206	8241	11131	7325	7473	9052	9424	5162	12439	Gnmt	744.244	949.691	595.761	649.429	757.173	909.731	451.508	990	8890.19	-0.585051	0.227838	-2.56784	0.0102335	0.0469149	DOWN
ENSMUSG00000002771	6658	2	11	2	4	3	2	3	4	Grin2d	0.0327167	0.169998	0.0294644	0.0629652	0.0454544	0.0349713	0.0475305	0.0576651	3.8075	0.629798	0.846994	0.743569	0.457137	0.659247	NOT
ENSMUSG00000002778	1874	867	914	1148	1057	851	911	1115	1119	Kdelr1	50.3886	50.1848	60.0875	59.1139	45.8098	56.5945	62.7625	57.3136	987.466	-0.108004	0.112415	-0.96076	0.336673	0.549612	NOT
ENSMUSG00000002781	7518	159	102	159	153	178	156	136	166	Tmem143	2.30344	1.39603	2.07447	2.13291	2.38845	2.41573	1.90823	2.11935	152.026	-0.548086	0.169245	-3.23842	0.00120192	0.00861427	DOWN
ENSMUSG00000002791	3119	3	1	1	1	5	3	2	1	Pdxk-ps	0.104758	0.0329898	0.0314482	0.0336023	0.161716	0.111978	0.067641	0.0307738	2.22271	-1.56769	1.06694	-1.46934	0.14174	NA	NOT
ENSMUSG00000002797	7745	85	142	153	163	82	117	164	132	Ggct	1.19531	1.88652	1.93768	2.20572	1.06805	1.75869	2.23366	1.63587	126.993	0.297145	0.192556	1.54317	0.12279	0.288203	NOT
ENSMUSG00000002799	6965	5	15	9	9	8	2	25	2	Jag2	0.0781865	0.221598	0.126746	0.135427	0.115869	0.0334298	0.378629	0.0275617	8.76761	1.47819	0.626676	2.35878	0.0183352	0.073085	UP
ENSMUSG00000002803	2324	167	172	146	150	150	157	188	200	Btbd6	7.82642	7.61531	6.16209	6.76456	6.51108	7.86482	8.5333	8.2602	165.93	-0.319389	0.158054	-2.02075	0.0433052	0.13746	NOT
ENSMUSG00000002804	1587	101	105	115	107	94	88	142	116	Nudt14	6.9315	6.80782	7.10776	7.06628	5.97515	6.45552	9.43858	7.01581	106.979	-0.0510768	0.167467	-0.304997	0.760369	0.87319	NOT
ENSMUSG00000002808	2745	19	37	163	103	21	21	235	26	Epdr1	0.753866	1.38693	5.82448	3.93259	0.771747	0.89064	9.03069	0.909134	70.562	2.30747	0.407945	5.65632	1.55e-08	6.95e-07	UP
ENSMUSG00000002812	5039	663	527	805	542	680	619	674	883	Flii	14.3302	10.7612	15.6698	11.273	13.6133	14.3012	14.1095	16.8195	671.79	-0.442419	0.137427	-3.2193	0.00128505	0.00905229	NOT
ENSMUSG00000002814	4599	96	123	97	116	80	78	125	91	Top3a	2.27348	2.75193	2.06881	2.6435	1.75479	1.9745	2.86709	1.89922	99.3484	0.137643	0.18812	0.731674	0.464367	0.664802	NOT
ENSMUSG00000002820	7264	325	417	270	329	426	291	339	358	Atg4d	4.87293	5.90685	3.64586	4.74684	5.91605	4.66383	4.92288	4.73047	344.518	-0.314062	0.179172	-1.75285	0.0796278	0.212757	NOT
ENSMUSG00000002825	1973	28	68	62	63	37	43	69	34	Qtrt1	1.54566	3.54632	3.08231	3.34655	1.89179	2.53727	3.68907	1.65405	49.1457	0.596379	0.245406	2.43017	0.0150916	0.0630014	UP
ENSMUSG00000002831	6350	168	234	106	140	205	73	56	180	Plin4	2.8815	3.79173	1.63736	2.31067	3.2567	1.33836	0.930271	2.72079	146.257	-0.440736	0.520404	-0.846913	0.397044	0.607899	NOT
ENSMUSG00000002833	4876	287	421	351	466	359	288	387	474	Hdgfl2	6.41064	8.88411	7.06082	10.0163	7.42726	6.87629	8.37226	9.33064	374.415	-0.0512772	0.169915	-0.301782	0.762818	0.87475	NOT
ENSMUSG00000002835	8854	12	32	36	35	14	6	37	15	Chaf1a	0.147613	0.371883	0.398818	0.414298	0.15951	0.0788927	0.440816	0.162611	22.0467	1.30346	0.348424	3.74101	0.000183279	0.00192375	UP
ENSMUSG00000002844	2966	70	94	122	123	112	78	120	97	Adprh	2.57045	3.26101	4.0346	4.34629	3.8093	3.0616	4.26781	3.13904	100.093	0.0843065	0.187514	0.449602	0.652997	0.804471	NOT
ENSMUSG00000002845	4094	113	152	140	164	113	112	195	148	Tmem39a	3.00617	3.82025	3.35422	4.19837	2.78438	3.1849	5.02437	3.46985	139.408	0.141683	0.164756	0.859958	0.389812	0.601431	NOT
ENSMUSG00000002846	1784	210	197	268	271	274	175	216	199	Timmdc1	12.8206	11.3623	14.735	15.9206	15.4937	11.4201	12.7719	10.7067	224.384	-0.129017	0.177766	-0.725768	0.467981	0.667747	NOT
ENSMUSG00000002847	2009	452	677	418	433	613	425	521	521	Pla1a	24.5043	34.674	20.4084	22.5888	30.7807	24.6283	27.356	24.8917	506.395	-0.23925	0.18933	-1.26367	0.20635	0.405223	NOT
ENSMUSG00000002870	6956	43	94	101	52	50	41	112	44	Mcm2	0.673274	1.39048	1.42421	0.78348	0.725118	0.686198	1.69845	0.607142	64.4569	0.720249	0.251332	2.86572	0.00416062	0.0230406	UP
ENSMUSG00000002871	4171	177	249	332	274	208	213	349	260	Tpra1	4.62185	6.14263	7.80745	6.88485	5.03062	5.94518	8.82634	5.98315	251.708	0.202261	0.144089	1.40372	0.160402	0.342308	NOT
ENSMUSG00000002881	4100	939	1119	1523	1156	939	837	1453	1028	Nab1	24.9439	28.0829	36.4357	29.5501	23.1036	23.7666	37.3832	24.0661	1098.99	0.199924	0.105815	1.88937	0.0588424	0.171491	NOT
ENSMUSG00000002885	3757	285	412	588	439	286	219	714	340	Adgre5	8.26203	11.2837	15.3514	12.2464	7.67932	6.78622	20.0471	8.6863	392.906	0.641689	0.161314	3.97788	6.95e-05	0.000865666	UP
ENSMUSG00000002897	8662	224	344	319	302	229	275	383	298	Il17ra	2.81652	4.08635	3.6123	3.65404	2.66695	3.69607	4.66419	3.30214	292.251	0.108077	0.148897	0.725847	0.467932	0.667734	NOT
ENSMUSG00000002900	9917	139	278	514	453	249	151	645	165	Lamb1	1.52657	2.88443	5.08387	4.78743	2.53289	1.77265	6.8608	1.59698	305.621	1.1284	0.228374	4.94102	7.77e-07	1.96e-05	UP
ENSMUSG00000002908	4587	105	99	73	71	106	103	59	112	Kcnn1	2.49312	2.22076	1.56101	1.62224	2.33118	2.61417	1.35681	2.34361	92.7904	-0.769	0.218621	-3.51751	0.000435619	0.00386079	DOWN
ENSMUSG00000002910	3232	53	149	111	119	74	55	127	93	Arrdc2	1.78602	4.74363	3.36871	3.85887	2.30972	1.98115	4.14503	2.7619	94.3816	0.618105	0.211323	2.92493	0.00344533	0.0197813	UP
ENSMUSG00000002930	1757	0	0	0	0	0	0	0	0	Ppp1r17	0	0	0	0	0	0	0	0	0	NA	NA	NA	NA	NA	NA
ENSMUSG00000002944	3590	1073	2873	5018	3155	1996	883	5195	1293	Cd36	32.5528	82.3449	137.103	92.1063	56.0873	28.6346	152.646	34.5701	2511.75	1.345	0.222805	6.03668	1.57e-09	9.54e-08	UP
ENSMUSG00000002948	3829	235	317	308	240	302	253	319	298	Map2k7	6.68445	8.51862	7.89	6.56916	7.95646	7.69237	8.78821	7.47012	281.642	-0.158226	0.139942	-1.13065	0.258201	0.466256	NOT
ENSMUSG00000002949	3664	386	443	581	428	471	376	460	516	Timm44	11.474	12.4407	15.5536	12.2426	12.9677	11.947	13.2433	13.5173	452.532	-0.148518	0.128676	-1.1542	0.248417	0.454924	NOT
ENSMUSG00000002957	5663	1204	841	1460	1004	1115	1076	1197	1320	Ap2a2	23.156	15.2808	25.2882	18.5811	19.8622	22.1203	22.2968	22.373	1147.3	-0.359744	0.144615	-2.4876	0.0128607	0.055702	NOT
ENSMUSG00000002963	3250	253	263	235	217	319	243	221	334	Pnkp	8.47852	8.3266	7.09245	6.99779	9.9016	8.70459	7.17305	9.86416	261.99	-0.565235	0.14538	-3.88798	0.000101083	0.00116152	DOWN
ENSMUSG00000002968	7629	489	624	503	539	626	507	531	661	Med25	6.98111	8.41613	6.46714	7.40466	8.27761	7.73688	7.34213	8.31631	559.393	-0.323313	0.139586	-2.31623	0.0205454	0.0794655	NOT
ENSMUSG00000002980	3199	48	70	140	131	57	41	193	42	Bcam	1.63422	2.25154	4.29265	4.29182	1.79746	1.49209	6.36412	1.26018	84.8881	1.20191	0.269801	4.45479	8.4e-06	0.000145934	UP
ENSMUSG00000002981	6210	1354	1447	1452	1614	1474	1296	1595	1458	Clptm1	23.7471	23.9758	22.9344	27.2393	23.9444	24.2962	27.0935	22.5353	1452.29	-0.151219	0.101076	-1.49609	0.13463	0.305569	NOT
ENSMUSG00000002983	3885	43	67	64	79	43	52	111	41	Relb	1.20548	1.77451	1.61585	2.13118	1.11654	1.55825	3.01389	1.01295	60.6596	0.542815	0.248655	2.183	0.0290357	0.102719	UP
ENSMUSG00000002984	4513	369	805	541	582	462	377	650	532	Tomm40	8.90521	18.3538	11.7583	13.5158	10.327	9.72526	15.193	11.3147	528.449	0.304143	0.169123	1.79836	0.0721202	0.197873	NOT
ENSMUSG00000002985	2138	38952	59497	38155	56385	63378	37088	33023	47510	Apoe	1984.29	2863.41	1750.47	2764.01	2990.4	2019.53	1629.31	2132.92	46799.1	-0.247106	0.230381	-1.0726	0.283453	0.494941	NOT
ENSMUSG00000002992	813	52	54	80	30	60	74	53	79	Apoc2	6.9662	6.83437	9.65186	3.86736	7.4449	10.5966	6.87671	9.32682	60.558	-0.580722	0.281664	-2.06175	0.0392311	0.127939	DOWN
ENSMUSG00000002996	6167	616	668	721	739	583	578	776	689	Hbp1	10.879	11.1455	11.4676	12.559	9.53658	10.9114	13.2734	10.7236	664.052	-0.0471398	0.103396	-0.455916	0.648451	0.801447	NOT
ENSMUSG00000002997	3652	6	9	24	18	12	11	30	14	Prkar2b	0.178938	0.253575	0.644603	0.516566	0.331473	0.350661	0.866534	0.367955	14.7617	0.617613	0.451205	1.36881	0.17106	0.358175	NOT
ENSMUSG00000003031	4552	273	443	504	392	295	323	560	438	Cdkn1b	6.53196	10.0138	10.8603	9.02543	6.53759	8.26086	12.9772	9.23568	393.439	0.232583	0.151634	1.53385	0.125067	0.291639	NOT
ENSMUSG00000003032	3049	36	77	70	100	61	28	100	35	Klf4	1.28596	2.59854	2.25192	3.43737	2.01823	1.06912	3.45969	1.10181	60.8074	0.842357	0.265143	3.17699	0.00148812	0.0101683	UP
ENSMUSG00000003033	3184	430	533	585	482	452	394	545	474	Ap1m1	14.7088	17.2246	18.0216	15.8657	14.3207	14.4062	18.0559	14.289	480.431	0.012108	0.107227	0.11292	0.910094	0.957213	NOT
ENSMUSG00000003037	4678	525	607	737	737	741	576	654	741	Rab8a	12.2231	13.3513	15.4532	16.5117	15.9792	14.3347	14.7473	15.2039	659.386	-0.191177	0.130449	-1.46554	0.142774	0.317203	NOT
ENSMUSG00000003038	3060	142	219	203	157	66	112	238	201	Hmgn2	5.05417	7.36407	6.50708	5.37728	2.17581	4.2611	8.20447	6.3048	162.418	0.374363	0.265102	1.41215	0.157907	0.33926	NOT
ENSMUSG00000003039	4409	560	640	592	704	625	481	681	607	Fam32a	13.8335	14.936	13.1702	16.7347	14.3001	12.7008	16.293	13.2143	605.357	-0.0719517	0.120329	-0.597956	0.549869	0.730947	NOT
ENSMUSG00000003051	2217	4	15	23	32	10	10	36	5	Elf3	0.196507	0.696179	1.01759	1.51275	0.455022	0.525121	1.7129	0.216472	15.8476	1.56777	0.470589	3.3315	0.000863781	0.00668538	UP
ENSMUSG00000003053	3061	3434	5671	4810	5505	4553	3181	4581	3956	Cyp2c29	122.186	190.63	154.132	188.486	150.049	120.983	157.867	124.048	4392.03	0.177713	0.145428	1.222	0.221706	0.423538	NOT
ENSMUSG00000003062	5600	115	136	122	186	95	121	147	118	Stard3nl	2.23662	2.49889	2.1369	3.48104	1.71133	2.51549	2.76901	2.02251	128.732	0.112575	0.205673	0.54735	0.584138	0.758089	NOT
ENSMUSG00000003068	4580	854	926	791	1059	1000	706	742	909	Stk11	20.3084	20.8037	16.9404	24.2334	22.0258	17.9459	17.0897	19.05	872.354	-0.244102	0.165587	-1.47417	0.140436	0.313929	NOT
ENSMUSG00000003070	2131	0	3	3	6	2	0	3	2	Efna2	0	0.144855	0.138086	0.295088	0.094677	0	0.148502	0.0900831	2.21466	1.6747	1.13825	1.4713	0.14121	NA	NOT
ENSMUSG00000003072	1928	2088	2981	2254	3054	2941	1885	2446	2159	Atp5d	117.952	159.093	114.672	166.015	153.881	113.823	133.827	107.484	2456.62	-0.0230483	0.175177	-0.131572	0.895323	0.950048	NOT
ENSMUSG00000003099	3136	426	502	536	495	476	382	557	415	Ppp5c	14.7951	16.4711	16.7649	16.543	15.3119	14.1812	18.7359	12.7019	467.681	0.0143451	0.113229	0.12669	0.899186	0.952049	NOT
ENSMUSG00000003119	11730	569	688	629	632	411	456	818	582	Cdk12	5.2832	6.03512	5.25974	5.64681	3.53461	4.52577	7.35615	4.76236	587.157	0.170024	0.148697	1.14342	0.252863	0.459821	NOT
ENSMUSG00000003123	5886	172	239	211	178	235	172	168	250	Lipe	3.18267	4.17805	3.5162	3.16945	4.02759	3.40199	3.01082	4.07677	202.613	-0.321714	0.180766	-1.77972	0.0751214	0.203982	NOT
ENSMUSG00000003131	8266	422	585	605	602	472	405	746	449	Pafah1b2	5.56032	7.28209	7.17913	7.63283	5.76029	5.70407	9.52004	5.21372	524.056	0.251585	0.11111	2.26429	0.0235564	0.0876659	NOT
ENSMUSG00000003134	5239	483	621	693	503	803	543	355	632	Tbc1d8	10.0411	12.1966	12.9747	10.0625	15.462	12.0664	7.14785	11.5789	581.412	-0.445584	0.220219	-2.02337	0.0430349	0.136901	NOT
ENSMUSG00000003135	3508	214	280	277	264	236	198	272	262	Cnot11	6.64412	8.21285	7.74518	7.8873	6.78657	6.57099	8.17908	7.16867	247.224	-0.0111341	0.126171	-0.0882461	0.929681	0.966114	NOT
ENSMUSG00000003153	7245	24	42	21	25	29	9	30	15	Slc2a3	0.360791	0.596494	0.28431	0.361648	0.403792	0.14462	0.436795	0.198724	23.8731	0.352999	0.403818	0.874152	0.382035	0.593984	NOT
ENSMUSG00000003154	5346	151	217	221	229	176	138	254	178	Foxj2	3.07632	4.17663	4.05485	4.48943	3.3211	3.00521	5.01187	3.19586	191.191	0.239459	0.133645	1.79175	0.0731728	0.200109	NOT
ENSMUSG00000003161	4852	359	437	554	455	352	357	529	431	Sri	8.05855	9.26736	11.1995	9.82822	7.31846	8.56589	11.5009	8.52616	426.401	0.112144	0.114122	0.98267	0.32577	0.538907	NOT
ENSMUSG00000003166	6853	421	510	446	455	443	360	469	470	Dgcr2	6.6909	7.65746	6.3836	6.95849	6.5211	6.11571	7.21917	6.58285	443.37	-0.123353	0.123272	-1.00066	0.31699	0.529682	NOT
ENSMUSG00000003184	3442	392	339	490	425	449	354	357	539	Irf3	12.4039	10.1341	13.9636	12.9408	13.1593	11.9734	10.9409	15.0305	416.44	-0.377907	0.149198	-2.53292	0.0113118	0.0504186	NOT
ENSMUSG00000003190	1976	20	24	30	31	29	27	29	29	Bcl2l12	1.10237	1.24974	1.48918	1.64422	1.4805	1.59075	1.54813	1.40867	27.1738	-0.163262	0.296432	-0.550756	0.581801	0.756337	NOT
ENSMUSG00000003198	2448	117	92	75	90	106	80	108	136	Zfp959	5.20544	3.86698	3.00512	3.85314	4.3681	3.80455	4.6538	5.33242	100.626	-0.538982	0.193757	-2.78174	0.00540682	0.02842	DOWN
ENSMUSG00000003199	2305	375	396	369	273	476	395	270	624	Mpnd	17.7192	17.6775	15.7024	12.413	20.8322	19.9504	12.3563	25.9843	401.153	-0.77531	0.186545	-4.15614	3.24e-05	0.00045467	DOWN
ENSMUSG00000003200	5012	204	372	366	393	283	214	459	265	Sh3gl1	4.43304	7.63708	7.16278	8.21799	5.69605	4.97082	9.66044	5.07495	310.219	0.440177	0.133452	3.29839	0.000972419	0.00732442	NOT
ENSMUSG00000003206	1154	7	20	11	13	15	9	18	14	Ebi3	0.660656	1.78328	0.934972	1.18065	1.31124	0.90795	1.64536	1.16445	13.0814	0.197167	0.441682	0.446401	0.655308	0.806021	NOT
ENSMUSG00000003208	4956	43	65	71	77	65	52	77	66	Yju2	0.944975	1.34951	1.4052	1.62833	1.32306	1.22151	1.63891	1.27823	63.3618	0.0829234	0.209592	0.395642	0.692369	0.831524	NOT
ENSMUSG00000003226	11728	2043	1710	2282	1930	1729	1660	2369	2238	Ranbp2	18.9726	15.0026	19.0855	17.2472	14.872	16.4782	21.3077	18.3161	1974.67	-0.175021	0.116526	-1.50199	0.133101	0.303692	NOT
ENSMUSG00000003227	3637	2	0	0	1	0	2	1	1	Edar	0.0598921	0	0	0.0288165	0	0.0640194	0.0290036	0.0263909	0.935487	-1.64851	1.71731	-0.959933	0.337089	NA	NOT
ENSMUSG00000003228	7055	111	119	187	161	110	98	255	127	Grk5	1.7136	1.73558	2.5999	2.39174	1.57287	1.61716	3.81275	1.72784	140.988	0.398927	0.199137	2.00328	0.0451476	0.142014	NOT
ENSMUSG00000003233	6410	297	371	410	326	359	295	437	389	Dvl3	5.0464	5.95541	6.2739	5.3302	5.64982	5.35783	7.19149	5.8249	355.536	-0.0762487	0.119483	-0.638153	0.523374	0.711608	NOT
ENSMUSG00000003234	3558	536	463	553	432	665	500	430	731	Abcf3	16.4075	13.3897	15.2451	12.7251	18.8544	16.3602	12.7485	19.7201	541.535	-0.644013	0.131993	-4.87916	1.07e-06	2.54e-05	DOWN
ENSMUSG00000003235	2595	409	507	523	562	480	417	497	556	Eif2b5	17.166	20.1032	19.7686	22.6978	18.6596	18.7079	20.2029	20.5653	489.282	-0.105906	0.123073	-0.860518	0.389504	0.60116	NOT
ENSMUSG00000003269	3445	166	260	248	299	252	163	253	220	Cyth2	5.2481	7.76568	7.06113	9.09633	7.3792	5.50838	7.74687	6.12957	228.574	0.13674	0.165726	0.825094	0.409318	0.618085	NOT
ENSMUSG00000003271	3950	2	3	6	5	1	1	15	0	Sult2b1	0.0551462	0.0781483	0.148993	0.132665	0.0255388	0.0294733	0.40058	0	3.73147	2.52442	1.02195	2.47021	0.0135034	0.0578613	UP
ENSMUSG00000003271	3950	2	3	6	5	1	1	15	0	Gm5897	0.0551462	0.0781483	0.148993	0.132665	0.0255388	0.0294733	0.40058	0	3.73147	2.52442	1.02195	2.47021	0.0135034	0.0578613	UP
ENSMUSG00000003273	1926	0	2	6	4	3	1	3	0	Car11	0	0.106849	0.305567	0.217665	0.157131	0.0604462	0.164309	0	2.22196	1.61565	1.16341	1.38872	0.164919	NA	NOT
ENSMUSG00000003279	17890	12	2	16	15	8	13	6	18	Dlgap1	0.0730557	0.0115031	0.0877246	0.087875	0.0451105	0.0845976	0.0353782	0.0965737	11.3219	-0.671787	0.569475	-1.17966	0.238135	0.442536	NOT
ENSMUSG00000003282	8487	9	13	8	5	8	16	10	24	Plag1	0.115497	0.15761	0.0924586	0.0617448	0.0950898	0.219478	0.124291	0.271428	11.7966	-0.931954	0.515429	-1.80811	0.070589	0.194813	NOT
ENSMUSG00000003283	2092	92	154	181	143	106	76	194	99	Hck	4.78971	7.57451	8.4865	7.16405	5.11143	4.22938	9.78217	4.54224	126.071	0.565656	0.161091	3.51142	0.000445721	0.00393584	UP
ENSMUSG00000003299	2617	349	382	395	375	426	315	369	400	Mrpl4	14.5246	15.0195	14.8049	15.018	16.4212	14.013	14.8737	14.6708	374.572	-0.245482	0.121149	-2.02628	0.0427365	0.136221	NOT
ENSMUSG00000003308	4693	503	650	576	776	726	370	652	455	Keap1	11.6735	14.2514	12.0388	17.3299	15.6057	9.1786	14.6552	9.30589	579.839	0.101248	0.195543	0.51778	0.604612	0.77323	NOT
ENSMUSG00000003309	3140	4	5	13	2	0	2	20	3	Ap1m2	0.138744	0.163846	0.406093	0.0667551	0	0.0741525	0.671886	0.091704	5.57155	1.81788	0.872591	2.08331	0.0372229	0.123371	UP
ENSMUSG00000003316	7090	1008	872	1109	796	1033	848	1135	1056	Glg1	15.4845	12.6551	15.3425	11.7666	14.6978	13.9243	16.8867	14.296	976.189	-0.300918	0.115541	-2.60442	0.00920296	0.043249	NOT
ENSMUSG00000003341	4713	0	0	0	0	1	0	0	0	Atp8b3	0	0	0	0	0.0214043	0	0	0	0.131698	-1.0051	3.53381	-0.284424	0.776085	NA	NOT
ENSMUSG00000003344	3586	225	177	207	220	233	215	212	247	Btbd2	6.83369	5.07877	5.66202	6.42979	6.55456	6.97997	6.23621	6.61125	217.7	-0.456127	0.132872	-3.43283	0.000597317	0.00497479	NOT
ENSMUSG00000003345	4835	649	877	898	935	1007	681	842	930	Csnk1g2	14.6195	18.6637	18.2176	20.2675	21.0102	16.3974	18.3701	18.4622	844.292	-0.146109	0.141108	-1.03544	0.300464	0.512903	NOT
ENSMUSG00000003346	1547	518	744	514	734	727	456	626	605	Abhd17a	36.4689	49.4855	32.59	49.7267	47.407	34.3162	42.6854	37.5372	610.702	-0.078312	0.179864	-0.435397	0.663275	0.811754	NOT
ENSMUSG00000003348	3254	43	92	139	127	51	45	150	48	Mob3a	1.43924	2.90915	4.18995	4.09044	1.58107	1.60998	4.8626	1.41586	82.3415	1.15121	0.204323	5.63427	1.76e-08	7.74e-07	UP
ENSMUSG00000003352	4010	9	11	62	33	11	7	58	17	Cacnb3	0.244445	0.282256	1.51656	0.86249	0.276724	0.203226	1.52573	0.406913	23.842	1.60339	0.48112	3.33261	0.000860354	0.00666498	UP
ENSMUSG00000003354	1992	0	1	0	1	0	0	2	0	Ccdc65	0	0.0516543	0	0.0526132	0	0	0.10591	0	0.447004	2.15019	2.37452	0.905524	0.365188	NA	NOT
ENSMUSG00000003355	2706	100	91	154	125	94	63	156	89	Fkbp11	4.0249	3.46026	5.58219	4.84135	3.50427	2.71043	6.08124	3.15689	105.792	0.314814	0.202868	1.55181	0.120707	0.284702	NOT
ENSMUSG00000003360	6229	530	656	614	782	700	468	755	545	Ddx23	9.26703	10.8363	9.66856	13.1575	11.3365	8.74687	12.7857	8.39798	622.57	0.0471683	0.147799	0.319139	0.749621	0.867369	NOT
ENSMUSG00000003363	2924	266	326	496	513	310	269	578	298	Pld3	9.90803	11.4719	16.6386	18.3876	10.695	10.7103	20.8519	9.78218	370.068	0.450812	0.158133	2.85083	0.00436053	0.023912	NOT
ENSMUSG00000003378	5168	135	133	90	131	147	174	140	217	Grik5	2.84508	2.64804	1.70817	2.65664	2.86941	3.91969	2.8576	4.03027	147.662	-0.719935	0.206439	-3.48739	0.000487754	0.00423604	DOWN
ENSMUSG00000003379	1457	22	13	21	8	20	17	21	13	Cd79a	1.64455	0.918077	1.41375	0.575459	1.38474	1.35836	1.52039	0.856408	16.9347	-0.500444	0.411465	-1.21625	0.22389	0.426021	NOT
ENSMUSG00000003380	1523	543	722	583	794	766	489	560	722	Rabac1	38.8314	48.779	37.5474	54.6393	50.7373	37.3796	38.7867	45.5024	643.785	-0.178372	0.179822	-0.991941	0.321226	0.534225	NOT
ENSMUSG00000003382	10274	260	380	279	378	309	269	435	324	Etv3	2.75624	3.80574	2.66364	3.856	3.03401	3.04816	4.46627	3.02693	324.576	0.0642622	0.158822	0.404619	0.685758	0.827119	NOT
ENSMUSG00000003402	4275	1031	1366	1193	1245	1309	926	1060	1336	Prkcsh	26.2667	32.8784	27.3726	30.5223	30.8888	25.2174	26.1556	29.9963	1176.02	-0.181776	0.144922	-1.2543	0.209733	0.409341	NOT
ENSMUSG00000003410	6890	0	0	0	1	0	0	1	0	Elavl3	0	0	0	0.0152113	0	0	0.01531	0	0.221838	1.14892	3.46409	0.331666	0.740141	NA	NOT
ENSMUSG00000003411	3524	4	5	30	15	2	1	32	5	Rab3b	0.123625	0.145992	0.83502	0.446108	0.0572522	0.0330361	0.957876	0.136186	10.5439	2.47083	0.686402	3.59969	0.000318598	0.00300805	UP
ENSMUSG00000003418	7664	1	2	8	2	1	0	2	1	St8sia6	0.0142111	0.0268516	0.102387	0.0273501	0.0131626	0	0.0275277	0.012524	1.94695	1.94147	1.25043	1.55264	0.12051	NA	NOT
ENSMUSG00000003420	2102	1972	2193	2472	2428	2821	1859	1918	2724	Fcgrt	102.178	107.35	115.353	121.06	135.384	102.961	96.2523	124.386	2289.13	-0.320506	0.147503	-2.17288	0.0297894	0.10466	NOT
ENSMUSG00000003421	2800	196	277	286	318	229	191	307	261	Nosip	7.62397	10.1793	10.0189	11.9029	8.25041	7.94146	11.5658	8.94704	253.156	0.163398	0.130639	1.25076	0.211022	0.410573	NOT
ENSMUSG00000003423	2020	234	320	286	294	303	206	289	293	Pih1d1	12.6167	16.3002	13.8876	15.2539	15.1318	11.8725	15.0918	13.9224	275.038	-0.0696956	0.143766	-0.484785	0.627829	0.788246	NOT
ENSMUSG00000003429	865	693	944	915	1013	784	755	1102	1017	Rps11	87.257	112.293	103.757	122.738	91.432	101.615	134.388	112.85	889.392	0.0152991	0.120706	0.126747	0.89914	0.952049	NOT
ENSMUSG00000003435	5764	656	825	782	695	998	680	822	779	Supt5	12.3955	14.7274	13.3074	12.637	17.4665	13.7344	15.0433	12.9721	776.267	-0.271533	0.141785	-1.9151	0.0554797	0.164333	NOT
ENSMUSG00000003436	2850	0	0	0	0	0	0	0	0	Dll3	0	0	0	0	0	0	0	0	0	NA	NA	NA	NA	NA	NA
ENSMUSG00000003437	3438	267	327	285	305	354	277	302	297	Paf1	8.4584	9.78672	8.13112	9.29776	10.3871	9.37992	9.26609	8.29177	301.205	-0.248212	0.144901	-1.71298	0.0867166	0.226773	NOT
ENSMUSG00000003438	2684	284	365	384	289	390	293	402	345	Timm50	11.5244	13.9928	14.0333	11.2849	14.6582	12.709	15.7993	12.3377	340.53	-0.147726	0.139119	-1.06186	0.288299	0.500036	NOT
ENSMUSG00000003444	1281	85	110	85	98	99	66	100	104	Med29	7.22691	8.83566	6.50851	8.01791	7.79622	5.99819	8.23467	7.79258	92.449	-0.11699	0.193087	-0.605891	0.544587	0.726964	NOT
ENSMUSG00000003452	27373	5	3	20	6	8	5	21	5	Bicd1	0.0198944	0.011277	0.071667	0.0229728	0.0294826	0.0212654	0.0809268	0.0175325	8.56161	0.797845	0.641518	1.24368	0.213616	0.413575	NOT
ENSMUSG00000003458	3975	729	778	986	746	747	734	1033	902	Ncstn	19.9744	20.139	24.3305	19.6692	18.9575	21.4973	27.4131	21.7804	821.287	-0.10149	0.113998	-0.890278	0.373316	0.585885	NOT
ENSMUSG00000003464	3815	2013	2997	3129	3058	2789	1827	3044	2624	Pex19	57.4688	80.8328	80.4494	84.0093	73.7483	55.7531	84.1677	66.0186	2633.3	0.133737	0.118542	1.12818	0.259245	0.467427	NOT
ENSMUSG00000003469	2910	1	3	5	3	2	4	1	1	Phyhip	0.0374274	0.106078	0.168534	0.108047	0.0693322	0.160027	0.0362495	0.032984	2.50176	0.27963	0.98902	0.282735	0.77738	NA	NOT
ENSMUSG00000003476	5115	0	1	0	0	2	0	0	0	Crhr2	0	0.0201164	0	0	0.0394441	0	0	0	0.384438	-1.00415	2.93222	-0.342456	0.732008	NA	NOT
ENSMUSG00000003477	1600	1147	1312	1188	913	1477	964	893	1763	Inmt	78.0776	84.3741	72.8296	59.8047	93.1234	70.1427	58.8744	105.762	1209.29	-0.566228	0.184081	-3.07596	0.00209823	0.0133572	DOWN
ENSMUSG00000003484	1855	14	31	47	23	10	10	46	9	Cyp4f18	0.821991	1.71954	2.48522	1.29948	0.543819	0.627598	2.61583	0.465688	22.2736	1.47147	0.379368	3.87876	0.000104992	0.00119908	UP
ENSMUSG00000003500	3294	43	86	119	109	103	43	136	56	Impdh1	1.42177	2.6864	3.54352	3.46806	3.15436	1.51974	4.35522	1.63178	83.4005	0.598684	0.26644	2.24697	0.0246419	0.0908747	UP
ENSMUSG00000003505	3232	0	0	0	0	0	1	0	0	Psg18	0	0	0	0	0	0.0360208	0	0	0.15317	-1.0051	3.53381	-0.284424	0.776085	NA	NOT
ENSMUSG00000003518	4682	649	901	1313	1306	970	548	1189	712	Dusp3	15.0972	19.8011	27.5071	29.2345	20.8996	13.6262	26.7883	14.5964	919.866	0.432975	0.16795	2.578	0.0099374	0.0458693	NOT
ENSMUSG00000003526	7797	1119	2020	736	1013	1485	1339	837	2087	Prodh	15.631	26.6575	9.25895	13.6165	19.2131	19.993	11.3238	25.6916	1346.33	-0.621443	0.413323	-1.50353	0.132703	0.30336	NOT
ENSMUSG00000003527	4231	83	102	106	99	81	62	114	113	Ess2	2.13657	2.48058	2.45739	2.45232	1.93126	1.70598	2.84222	2.56349	93.1614	0.0408799	0.184766	0.221252	0.824896	0.911762	NOT
ENSMUSG00000003528	2164	1215	1294	1411	1447	1770	1099	1109	1330	Slc25a1	61.1508	61.528	63.956	70.0802	82.5114	59.1243	54.0592	58.9917	1332.4	-0.310348	0.161992	-1.91582	0.0553882	0.16412	NOT
ENSMUSG00000003531	2985	218	256	225	302	302	191	223	292	Dgcr6	7.95418	8.82452	7.39349	10.6034	10.2061	7.44928	7.88054	9.38935	249.939	-0.255527	0.179422	-1.42417	0.154398	0.333892	NOT
ENSMUSG00000003534	4774	28	110	192	230	52	27	326	34	Ddr1	0.638791	2.37086	3.94485	5.04928	1.0988	0.658425	7.20328	0.683586	114.221	2.31127	0.300342	7.69545	1.41e-14	3.44e-12	UP
ENSMUSG00000003541	1131	12	34	47	68	21	12	84	17	Ier3	1.15558	3.09323	4.07612	6.30131	1.87307	1.23522	7.83451	1.44272	34.342	1.62444	0.349505	4.64784	3.35e-06	6.67e-05	UP
ENSMUSG00000003545	6243	21	6	16	30	6	7	25	4	Fosb	0.366361	0.0988902	0.251384	0.503631	0.0969518	0.130536	0.422418	0.0614984	13.9317	0.697675	0.606892	1.14959	0.250315	0.457008	NOT
ENSMUSG00000003546	2377	523	577	601	615	622	523	491	725	Klc4	23.9638	24.9771	24.8003	27.1163	26.3973	25.6152	21.7895	29.2756	583.688	-0.334473	0.138451	-2.41582	0.0157	0.0649377	NOT
ENSMUSG00000003549	3111	31	27	52	37	35	31	44	40	Ercc1	1.08529	0.893016	1.63951	1.24648	1.13492	1.16008	1.49193	1.23412	36.5001	-0.0636358	0.269656	-0.235989	0.813441	0.905154	NOT
ENSMUSG00000003555	2769	554	1239	2257	781	1503	1591	690	1279	Cyp17a1	21.7906	46.0409	79.9503	29.5605	54.7563	66.8917	26.2858	44.3348	1235	-0.280496	0.502772	-0.557899	0.576914	0.75242	NOT
ENSMUSG00000003559	3212	819	666	820	554	982	928	515	990	As3mt	27.771	21.3351	25.0409	18.0767	30.8414	33.6355	16.9132	29.584	797.521	-0.822668	0.16423	-5.00924	5.46e-07	1.45e-05	DOWN
ENSMUSG00000003573	3440	17	31	50	40	30	15	56	20	Homer3	0.538237	0.927254	1.42568	1.21867	0.879753	0.507643	1.71722	0.558044	30.816	0.823735	0.311331	2.64585	0.0081487	0.0393589	UP
ENSMUSG00000003575	11182	120	165	148	150	176	112	189	190	Crtc1	1.16881	1.51831	1.29824	1.40591	1.58778	1.16607	1.78294	1.63091	154.018	-0.143097	0.174872	-0.818298	0.413187	0.621773	NOT
ENSMUSG00000003581	2232	122	170	183	175	150	112	146	150	Rnf215	5.95317	7.83701	8.04208	8.21728	6.77946	5.84183	6.90008	6.45051	148.826	0.0642043	0.163141	0.393552	0.693912	0.832902	NOT
ENSMUSG00000003585	3505	5935	3430	6515	5677	6846	5278	4543	6568	Sec14l2	184.423	100.694	182.322	169.752	197.037	175.31	136.726	179.863	5620.82	-0.571929	0.170418	-3.35604	0.000790684	0.00621668	DOWN
ENSMUSG00000003604	5001	124	135	135	182	173	116	102	124	Aven	2.70052	2.77762	2.64782	3.81416	3.48969	2.70039	2.15149	2.37992	136.383	-0.223455	0.226784	-0.985321	0.324467	0.537546	NOT
ENSMUSG00000003617	9566	13223	15458	16493	13229	15152	13489	17385	14983	Cp	150.551	166.272	169.115	144.938	159.786	164.163	191.708	150.337	14802	-0.148327	0.0969964	-1.5292	0.126215	0.293383	NOT
ENSMUSG00000003623	5456	15591	9473	21839	16354	15156	13811	14465	15231	Crot	311.231	178.652	392.618	314.148	280.226	294.697	279.666	267.948	15136.4	-0.240845	0.193414	-1.24523	0.213047	0.412935	NOT
ENSMUSG00000003644	4258	215	197	309	234	211	149	241	220	Rps6ka1	5.49941	4.76054	7.11811	5.75963	4.99891	4.07386	5.97044	4.95923	218.07	0.0219853	0.162191	0.135552	0.892176	0.948485	NOT
ENSMUSG00000003657	1743	0	0	0	0	0	0	0	0	Calb2	0	0	0	0	0	0	0	0	0	NA	NA	NA	NA	NA	NA
ENSMUSG00000003660	7819	1227	1308	1543	1377	1210	1175	1601	1394	Snrnp200	17.0913	17.2128	19.3565	18.4572	15.6111	17.4949	21.5991	17.1123	1338.8	-0.0664591	0.0885886	-0.750199	0.453135	0.656397	NOT
ENSMUSG00000003662	3197	443	456	577	491	499	447	493	519	Ciao1	15.0919	14.6763	17.7029	16.0962	15.7455	16.2776	16.2667	15.5819	487.569	-0.202494	0.111764	-1.8118	0.0700178	0.193744	NOT
ENSMUSG00000003665	4518	0	1	2	0	0	0	4	1	Has1	0	0.0227745	0.0434206	0	0	0	0.0933919	0.0212447	0.87631	2.19563	1.82831	1.20091	0.229786	NA	NOT
ENSMUSG00000003680	5017	20	42	43	54	56	36	53	29	Taf6l	0.434179	0.861392	0.84069	1.12806	1.12601	0.835379	1.11436	0.554818	40.8982	0.163591	0.314115	0.5208	0.602506	0.771605	NOT
ENSMUSG00000003680	5017	20	42	43	54	56	36	53	29	Gm2518	0.434179	0.861392	0.84069	1.12806	1.12601	0.835379	1.11436	0.554818	40.8982	0.163591	0.314115	0.5208	0.602506	0.771605	NOT
ENSMUSG00000003721	3473	9710	14760	11070	12735	13193	8651	9706	10395	Insig2	304.507	437.298	312.647	384.307	383.21	289.993	294.802	287.287	11212.1	-0.0584669	0.180739	-0.323488	0.746326	0.865412	NOT
ENSMUSG00000003731	6729	803	847	1105	912	835	700	983	975	Kpna6	12.9971	12.9517	16.1073	14.2046	12.518	12.1108	15.4098	13.9076	882.701	-0.06377	0.102883	-0.619834	0.535367	0.721	NOT
ENSMUSG00000003746	9647	2239	2200	2520	2166	2382	2108	1914	2723	Man1a	25.2781	23.4653	25.6224	23.5315	24.9085	25.4392	20.9288	27.0927	2282.11	-0.377066	0.120245	-3.1358	0.00171383	0.0113483	NOT
ENSMUSG00000003752	5285	58	67	81	77	65	56	78	69	Itpkc	1.19527	1.30444	1.50332	1.52697	1.2407	1.23358	1.55684	1.25314	67.9043	0.00796451	0.19292	0.041284	0.96707	0.984354	NOT
ENSMUSG00000003762	5586	119	316	175	204	151	112	217	152	Coq8b	2.32022	5.82079	3.0729	3.82748	2.72693	2.33422	4.09783	2.6118	176.39	0.512158	0.218452	2.34449	0.0190533	0.0753369	UP
ENSMUSG00000003778	10633	286	391	380	353	243	253	447	277	Brd8	2.9295	3.7837	3.50541	3.47939	2.30541	2.77006	4.43452	2.50047	321.922	0.280973	0.133118	2.11071	0.0347974	0.117619	NOT
ENSMUSG00000003779	4338	25	157	167	139	26	18	216	35	Kif20a	0.627673	3.72397	3.77606	3.35822	0.604619	0.483068	5.25242	0.774418	89.9354	2.42667	0.227277	10.6772	1.3e-26	2.44e-23	UP
ENSMUSG00000003808	4538	176	217	284	245	284	185	259	213	Farsa	4.22407	4.92029	6.13854	5.6583	6.31323	4.74605	6.02047	4.50518	229.677	-0.0524356	0.162521	-0.322639	0.746968	0.865693	NOT
ENSMUSG00000003809	2754	4039	4379	3925	3438	4996	3971	3001	5288	Gcdh	159.732	163.609	139.794	130.836	183.002	167.865	114.947	184.3	4161	-0.575097	0.154478	-3.72283	0.000197001	0.00203483	DOWN
ENSMUSG00000003810	8049	277	346	461	436	279	240	438	316	Mast2	3.74818	4.42313	5.61786	5.67713	3.49672	3.47132	5.74021	3.76827	340.314	0.314433	0.122249	2.57206	0.0101095	0.0464853	NOT
ENSMUSG00000003812	5389	235	213	370	334	273	239	316	250	Dnase2a	4.74944	4.06693	6.7345	6.49565	5.11037	5.16315	6.18549	4.45275	274.656	0.0153879	0.166039	0.0926766	0.926161	0.96382	NOT
ENSMUSG00000003812	5389	235	213	370	334	273	239	316	250	Gm38426	4.74944	4.06693	6.7345	6.49565	5.11037	5.16315	6.18549	4.45275	274.656	0.0153879	0.166039	0.0926766	0.926161	0.96382	NOT
ENSMUSG00000003813	2577	360	297	462	369	471	351	355	448	Rad23a	15.215	11.8587	17.5849	15.0071	18.4376	15.8569	14.5315	16.6863	388.252	-0.416912	0.144902	-2.8772	0.00401221	0.0223361	NOT
ENSMUSG00000003814	2880	4981	3386	3214	3398	4912	4714	3399	5609	Calr	188.368	120.973	109.462	123.656	172.054	190.556	124.496	186.935	4276.89	-0.872253	0.0985806	-8.84812	8.9e-19	5.17e-16	DOWN
ENSMUSG00000003824	1968	65	62	86	54	78	64	55	72	Syce2	3.59726	3.24162	4.28632	2.87576	3.99823	3.786	2.94804	3.51159	67.0388	-0.401234	0.219998	-1.8238	0.0681819	0.190794	NOT
ENSMUSG00000003847	18378	765	752	966	742	614	768	1212	850	Nfat5	4.53363	4.21032	5.15573	4.23146	3.3703	4.86506	6.95664	4.43933	820.585	-0.00837737	0.161624	-0.0518326	0.958662	0.98089	NOT
ENSMUSG00000003848	3486	103	229	175	241	167	83	216	129	Nob1	3.21805	6.75933	4.92405	7.24559	4.83267	2.77189	6.53614	3.55189	162.678	0.576558	0.209388	2.75354	0.00589546	0.0304566	UP
ENSMUSG00000003849	1553	115	154	201	189	95	78	331	100	Nqo1	8.06509	10.2034	12.6951	12.7548	6.17092	5.84721	22.4829	6.18053	150.166	0.87306	0.220474	3.95993	7.5e-05	0.000914469	UP
ENSMUSG00000003863	7899	1	1	0	0	1	0	3	0	Ppfia3	0.0137883	0.0130264	0	0	0.012771	0	0.0400631	0	0.707444	0.662799	2.00141	0.331165	0.74052	NA	NOT
ENSMUSG00000003865	4789	37	42	43	39	45	46	51	49	Gys1	0.841472	0.902402	0.880715	0.853501	0.947907	1.11825	1.12336	0.982083	43.8798	-0.301756	0.238443	-1.26553	0.205682	0.40429	NOT
ENSMUSG00000003868	2902	86	146	128	144	135	88	144	128	Ruvbl2	3.22763	5.17668	4.32637	5.20055	4.69283	3.53029	5.23432	4.2336	122.646	0.0951175	0.181274	0.524716	0.59978	0.769503	NOT
ENSMUSG00000003872	1463	1	0	0	1	0	0	0	1	Lin7b	0.0744455	0	0	0.0716374	0	0	0	0.0656074	0.382691	-0.988665	2.566	-0.385294	0.70002	NA	NOT
ENSMUSG00000003873	1576	103	309	239	404	186	101	301	153	Bax	7.1181	20.1743	14.8749	26.8664	11.9057	7.46089	20.1468	9.3182	215.518	0.950355	0.225154	4.22091	2.43e-05	0.000356043	UP
ENSMUSG00000003882	4663	23	32	32	15	16	16	34	37	Il7r	0.537212	0.706123	0.673126	0.33714	0.346141	0.399466	0.769146	0.761611	25.0067	0.025558	0.368495	0.0693578	0.944705	0.973308	NOT
ENSMUSG00000003923	4438	581	729	707	629	612	496	661	683	Tfam	14.2584	16.9019	15.6259	14.8541	13.9111	13.0113	15.7112	14.7717	630.542	-0.072237	0.116035	-0.622547	0.533582	0.720086	NOT
ENSMUSG00000003929	6790	42	37	87	53	29	59	102	46	Zfp81	0.673694	0.560696	1.25679	0.81807	0.43085	1.0116	1.58462	0.650257	55.2155	0.33865	0.328513	1.03086	0.302607	0.515153	NOT
ENSMUSG00000003934	3183	4	3	1	3	0	3	3	2	Efnb3	0.136869	0.0969795	0.0308159	0.09878	0	0.109726	0.0994214	0.0603101	2.41083	-0.149338	1.02143	-0.146204	0.88376	NA	NOT
ENSMUSG00000003948	3581	1495	1101	1972	1669	1532	1249	1488	1514	Mmd	45.4695	31.6358	54.015	48.8468	43.1571	40.6054	43.8323	40.5806	1489.31	-0.181737	0.155543	-1.1684	0.242644	0.448497	NOT
ENSMUSG00000003949	6681	615	736	567	451	670	541	481	898	Hlf	10.0257	11.3353	8.3244	7.07488	10.1165	9.42716	7.59449	12.9012	622.304	-0.54181	0.189804	-2.85457	0.00430951	0.0236939	DOWN
ENSMUSG00000003955	850	314	324	359	377	346	234	320	330	Fam162a	40.234	39.2213	41.4273	46.4843	41.0634	32.0496	39.7124	37.2642	322.285	-0.0991231	0.142137	-0.697379	0.485565	0.68136	NOT
ENSMUSG00000003970	1359	1771	3323	2494	3212	3153	1971	2438	2824	Rpl8	141.933	251.598	180.007	247.708	234.047	168.847	189.238	199.454	2619.25	-0.0133948	0.19321	-0.0693277	0.944729	0.973308	NOT
ENSMUSG00000003974	3049	0	0	0	0	0	0	0	0	Grm3	0	0	0	0	0	0	0	0	0	NA	NA	NA	NA	NA	NA
ENSMUSG00000003992	7985	22	26	17	26	23	17	29	10	Ssbp2	0.300076	0.335038	0.208826	0.341258	0.29057	0.247856	0.383105	0.120205	21.055	0.153239	0.38186	0.401296	0.688202	0.828467	NOT
ENSMUSG00000004018	3372	67	67	53	58	73	57	64	81	Fancl	2.16406	2.04448	1.5417	1.80271	2.1839	1.96794	2.00211	2.30566	65.1437	-0.473585	0.20665	-2.29172	0.0219218	0.0832101	NOT
ENSMUSG00000004031	8767	0	0	0	0	0	0	0	1	Brinp2	0	0	0	0	0	0	0	0.0109483	0.122645	-1.0051	3.53381	-0.284424	0.776085	NA	NOT
ENSMUSG00000004032	1278	51	82	129	78	62	48	103	86	Gstm5	4.34633	6.60205	9.9008	6.39658	4.89394	4.37256	8.50162	6.45899	77.096	0.390027	0.222592	1.7522	0.0797388	0.21302	NOT
ENSMUSG00000004035	1601	345	460	479	338	458	419	512	549	Gstm7	23.4699	29.5639	29.3465	22.1263	28.8584	30.4683	33.7345	32.9138	441.473	-0.264912	0.153486	-1.72596	0.0843539	0.22184	NOT
ENSMUSG00000004038	1311	94	648	3505	3116	90	46	4976	104	Gstm3	7.80923	50.859	262.239	249.103	6.92529	4.08489	400.38	7.61426	1387.15	4.89667	0.557674	8.78051	1.63e-18	9.14e-16	UP
ENSMUSG00000004040	9527	1887	2261	1855	1222	1516	2030	1789	2839	Stat3	21.5724	24.4197	19.0985	13.4431	16.0524	24.8065	19.8084	28.6026	1931.62	-0.487321	0.210707	-2.31279	0.0207342	0.0800173	NOT
ENSMUSG00000004043	7133	196	213	304	232	240	164	258	259	Stat5a	2.99273	3.07258	4.18035	3.40879	3.3942	2.67668	3.81542	3.48517	229.197	-0.0467612	0.148286	-0.315345	0.7525	0.869066	NOT
ENSMUSG00000004044	3587	111	164	303	268	143	114	334	134	Cavin1	3.37035	4.70444	8.28558	7.83047	4.02164	3.69997	9.82224	3.58567	187.446	0.796767	0.193718	4.11302	3.91e-05	0.000532173	UP
ENSMUSG00000004054	4393	406	628	660	621	567	396	616	550	Map3k11	10.0658	14.7094	14.7365	14.8154	13.0203	10.4944	14.7916	12.0171	545.147	0.125549	0.12543	1.00094	0.316854	0.529671	NOT
ENSMUSG00000004056	7131	952	1039	1083	1026	1217	978	1006	1224	Akt2	14.5402	14.992	14.8967	15.0793	17.2162	15.9666	14.8814	16.4751	1064.01	-0.347747	0.107287	-3.24128	0.00118993	0.00855111	NOT
ENSMUSG00000004069	3912	1489	1353	1725	1441	1710	1500	1459	1786	Dnaja3	41.4552	35.5873	43.2516	38.6055	44.0956	44.6393	39.3416	43.8207	1557.66	-0.399294	0.100187	-3.98549	6.73e-05	0.000843434	NOT
ENSMUSG00000004070	2217	447	506	489	506	599	447	467	634	Hmox2	21.9596	23.4844	21.6349	23.9204	27.2558	23.4729	22.2201	27.4486	511.013	-0.379269	0.131413	-2.88609	0.00390061	0.021823	NOT
ENSMUSG00000004071	10094	1826	2026	1243	1330	2449	1826	1212	2390	Cdip1	19.7025	20.6525	12.0787	13.8093	24.475	21.0602	12.6659	22.7264	1817.55	-0.803054	0.19728	-4.07063	4.69e-05	0.00061796	DOWN
ENSMUSG00000004085	10175	164	300	306	316	167	162	308	189	Map3k20	1.75547	3.03377	2.94984	3.25489	1.65569	1.85356	3.19309	1.78289	231.977	0.571124	0.131073	4.3573	1.32e-05	0.000215909	UP
ENSMUSG00000004096	1571	411	462	526	567	472	381	605	511	Cwc15	28.4937	30.2595	32.8414	37.8261	30.3085	28.2341	40.6232	31.2206	484.191	0.00425897	0.11285	0.0377401	0.969895	0.985343	NOT
ENSMUSG00000004098	6809	251	185	230	160	306	217	200	274	Col5a3	4.01489	2.79566	3.31326	2.46275	4.53353	3.71024	3.09843	3.86246	229.774	-0.717043	0.145815	-4.91749	8.77e-07	2.15e-05	DOWN
ENSMUSG00000004099	7377	138	140	227	163	171	155	251	143	Dnmt1	2.03743	1.95274	3.01827	2.31575	2.33838	2.44612	3.58913	1.8606	170.241	0.0612132	0.187158	0.327067	0.743617	0.863898	NOT
ENSMUSG00000004100	4004	157	369	233	344	175	109	352	168	Ppan	4.2706	9.48261	5.70786	9.00427	4.40902	3.16926	9.2735	4.02728	229.682	0.827401	0.197159	4.19661	2.71e-05	0.000390687	UP
ENSMUSG00000004105	6286	158	183	355	298	211	153	299	195	Angptl2	2.73757	2.99552	5.53944	4.96851	3.38615	2.83362	5.01755	2.97754	224.353	0.376688	0.184991	2.03625	0.0417252	0.134015	NOT
ENSMUSG00000004110	25228	4	5	8	5	6	4	9	9	Cacna1e	0.0172687	0.0203931	0.0311042	0.0207717	0.023992	0.0184588	0.0376318	0.0342418	6.07141	-0.0446434	0.60438	-0.0738665	0.941117	0.972009	NOT
ENSMUSG00000004113	9942	0	16	15	23	3	1	127	1	Cacna1b	0	0.165593	0.147989	0.242459	0.0304401	0.0117099	1.34749	0.00965435	20.1597	4.84661	0.914553	5.29943	1.16e-07	3.87e-06	UP
ENSMUSG00000004127	7976	53	54	65	52	49	51	65	55	Trmt10a	0.723725	0.696633	0.799355	0.683286	0.619739	0.744407	0.859654	0.661873	55.0036	-0.105751	0.214139	-0.493844	0.621416	0.784895	NOT
ENSMUSG00000004151	13296	12	5	20	19	19	16	33	13	Etv1	0.0982977	0.0386941	0.147544	0.149767	0.144155	0.140096	0.261811	0.0938467	16.6945	0.0442132	0.472751	0.0935232	0.925488	0.963519	NOT
ENSMUSG00000004187	3932	42	26	42	20	71	70	36	88	Kifc2	1.16337	0.680386	1.04773	0.53309	1.82156	2.07257	0.965793	2.14816	50.6317	-1.41361	0.287022	-4.9251	8.43e-07	2.09e-05	DOWN
ENSMUSG00000004207	2744	7668	8624	10978	10882	9373	6752	11220	8163	Psap	304.355	323.385	392.42	415.632	344.582	286.466	431.324	285.537	9040.59	0.101622	0.110284	0.921459	0.356811	0.570179	NOT
ENSMUSG00000004221	8110	1557	1023	1333	1234	1115	716	1258	923	Ikbkg	20.9098	12.9793	16.1221	15.947	13.8692	10.2782	16.3627	10.9239	1135.45	-0.119886	0.206831	-0.579633	0.562162	0.740804	NOT
ENSMUSG00000004231	5409	0	0	0	1	0	0	0	0	Pax2	0	0	0	0.0193761	0	0	0	0	0.117714	0.43757	3.53381	0.123824	0.901455	NA	NOT
ENSMUSG00000004233	5946	52	54	88	71	68	52	62	69	Wars2	0.952492	0.934468	1.45167	1.25146	1.15367	1.01813	1.09992	1.11384	63.6433	-0.088568	0.220175	-0.402263	0.687491	0.828143	NOT
ENSMUSG00000004263	4600	31	29	32	46	27	18	32	22	Atn1	0.733984	0.648688	0.682345	1.04806	0.592112	0.455554	0.733816	0.459052	29.1385	0.226035	0.316782	0.713534	0.475515	0.673593	NOT
ENSMUSG00000004264	3718	1811	2639	2249	2271	2470	1797	2189	2438	Phb2	53.0508	73.0341	59.3324	64.0165	67.0171	56.2683	62.1057	62.9392	2215.03	-0.13025	0.136209	-0.956247	0.338947	0.551935	NOT
ENSMUSG00000004266	2802	348	393	422	366	385	276	434	393	Ptpn6	13.5268	14.4318	14.7726	13.6898	13.8609	11.4674	16.3387	13.4624	372.155	-0.0731321	0.116294	-0.628856	0.529443	0.716623	NOT
ENSMUSG00000004267	4705	0	2	5	6	2	1	7	2	Eno2	0	0.0437387	0.104237	0.133652	0.0428814	0.0247438	0.15694	0.0408007	2.87941	1.72166	0.993066	1.73368	0.0829752	NA	NOT
ENSMUSG00000004268	4632	372	380	490	410	413	395	435	470	Emg1	8.74697	8.44132	10.3762	9.27683	8.99455	9.92782	9.9064	9.73927	417.988	-0.22761	0.115332	-1.97352	0.048436	0.149594	NOT
ENSMUSG00000004270	3268	1241	1305	1458	1392	1270	1171	1361	1589	Lpcat3	41.3593	41.0888	43.761	44.6418	39.203	41.7158	43.931	46.6701	1339.22	-0.209931	0.0999273	-2.10083	0.0356557	0.119707	NOT
ENSMUSG00000004285	1063	338	438	428	541	444	301	376	375	Atp6v1f	34.6311	42.3971	39.4932	53.3394	42.1355	32.9654	37.3121	33.8606	400.78	0.0232901	0.170007	0.136995	0.891035	0.947884	NOT
ENSMUSG00000004296	1967	1	0	0	2	0	1	1	0	Il12b	0.0553705	0	0	0.106564	0	0.0591863	0.0536279	0	0.635054	0.264281	2.06056	0.128257	0.897946	NA	NOT
ENSMUSG00000004317	11452	112	133	165	106	116	64	139	121	Clcn5	1.06517	1.19499	1.41323	0.970083	1.02182	0.650615	1.28035	1.01415	116.741	0.121201	0.201915	0.600257	0.548335	0.730059	NOT
ENSMUSG00000004319	17071	1077	906	1213	1056	1042	878	1226	1040	Clcn3	6.87131	5.46091	6.96969	6.4832	6.15753	5.98771	7.57577	5.84751	1045.26	-0.164719	0.109829	-1.49978	0.133671	0.304399	NOT
ENSMUSG00000004328	6710	9	10	11	0	15	7	11	6	Hif3a	0.146084	0.153346	0.160798	0	0.225511	0.121451	0.172928	0.0858273	8.60901	-0.508642	0.669272	-0.759993	0.447259	0.651412	NOT
ENSMUSG00000004341	1368	5	8	5	4	4	5	6	18	Gpx6	0.398077	0.601727	0.358505	0.306449	0.294966	0.425509	0.462658	1.26294	6.81616	-0.715409	0.653436	-1.09484	0.273586	0.484436	NOT
ENSMUSG00000004344	1674	0	0	0	0	0	0	1	0	Gpx5	0	0	0	0	0	0	0.0630144	0	0.104124	0.43757	3.53381	0.123824	0.901455	NA	NOT
ENSMUSG00000004347	20520	7	5	15	8	8	4	17	9	Pde1c	0.0371538	0.025072	0.071701	0.0408599	0.0393288	0.0226938	0.087391	0.0420981	8.70438	0.392492	0.547007	0.717526	0.47305	0.671795	NOT
ENSMUSG00000004356	10199	322	497	398	392	364	317	418	388	Utp20	3.4386	5.01411	3.82769	4.02822	3.60033	3.61849	4.32329	3.6515	382.745	0.0208292	0.141433	0.147273	0.882917	0.943652	NOT
ENSMUSG00000004359	3841	46	78	100	68	60	45	142	65	Spic	1.30436	2.08952	2.55368	1.85545	1.57581	1.36393	3.89977	1.6243	72.3515	0.555019	0.238396	2.32814	0.0199046	0.0778557	UP
ENSMUSG00000004360	5767	0	0	0	0	0	1	0	0	9330159F19Rik	0	0	0	0	0	0.0201872	0	0	0.15317	-1.0051	3.53381	-0.284424	0.776085	NA	NOT
ENSMUSG00000004364	4873	864	965	1190	1032	782	913	1238	1139	Cul3	19.3108	20.3763	23.9531	22.1956	16.1886	21.8122	26.7991	22.4349	1001.29	-0.0275858	0.126141	-0.218691	0.826891	0.913068	NOT
ENSMUSG00000004366	721	0	0	0	0	0	0	0	0	Sst	0	0	0	0	0	0	0	0	0	NA	NA	NA	NA	NA	NA
ENSMUSG00000004371	2081	0	0	2	1	1	0	2	3	Il11	0	0	0.0942691	0.0503631	0.0484759	0	0.10138	0.138371	1.04172	0.0820222	1.58245	0.0518322	0.958662	NA	NOT
ENSMUSG00000004383	7976	118	126	155	163	111	91	161	119	Large1	1.61131	1.62548	1.90615	2.14184	1.4039	1.32826	2.1293	1.43205	127.899	0.180919	0.161303	1.12161	0.262028	0.470796	NOT
ENSMUSG00000004393	2533	291	441	393	321	410	308	323	341	Ddx56	12.5124	17.9143	15.2184	13.2817	16.3285	14.156	13.4512	12.9216	351.68	-0.141777	0.170629	-0.830908	0.406026	0.615794	NOT
ENSMUSG00000004394	2178	1126	981	1359	1031	1532	1043	931	1269	Tmed4	56.3071	46.3454	61.2031	49.6118	70.9576	55.7509	45.0907	55.9243	1161.32	-0.485511	0.151121	-3.21274	0.00131476	0.00922687	NOT
ENSMUSG00000004415	8176	0	0	0	0	0	0	0	0	Col26a1	0	0	0	0	0	0	0	0	0	NA	NA	NA	NA	NA	NA
ENSMUSG00000004446	3550	95	147	101	77	109	99	127	96	Bid	2.9146	4.26073	2.79065	2.27325	3.09739	3.24662	3.77373	2.59561	105.81	-0.103629	0.224763	-0.46106	0.644755	0.79893	NOT
ENSMUSG00000004451	4930	180	205	283	235	188	125	251	145	Ralb	3.97657	4.27861	5.63055	4.9958	3.84688	2.95181	5.37059	2.82305	196.502	0.323727	0.166968	1.93885	0.0525196	0.158178	NOT
ENSMUSG00000004455	3424	640	979	843	949	805	662	876	831	Ppp1cc	20.3577	29.4201	24.1493	29.048	23.717	22.5087	26.9877	23.2951	812.947	0.0420322	0.128504	0.327088	0.743601	0.863898	NOT
ENSMUSG00000004455	3424	640	979	843	949	805	662	876	831	Ppp1ccb	20.3577	29.4201	24.1493	29.048	23.717	22.5087	26.9877	23.2951	812.947	0.0420322	0.128504	0.327088	0.743601	0.863898	NOT
ENSMUSG00000004460	3236	545	623	546	615	718	617	597	715	Dnajb11	18.343	19.8096	16.5499	19.9182	22.3828	22.1974	19.4608	21.2077	623.295	-0.398462	0.12961	-3.07431	0.00210992	0.0134184	NOT
ENSMUSG00000004462	6939	203	220	187	174	232	230	203	279	Tbccd1	3.18627	3.26228	2.64336	2.62807	3.37279	3.85883	3.08599	3.85926	217.351	-0.544521	0.151329	-3.59827	0.000320344	0.00302185	DOWN
ENSMUSG00000004473	2978	12	23	28	22	19	22	20	20	Clec11a	0.438874	0.794692	0.922242	0.774252	0.643616	0.860049	0.708436	0.644618	20.5148	0.0658822	0.351407	0.187481	0.851283	0.926529	NOT
ENSMUSG00000004500	4776	48	50	75	47	67	47	52	60	Zfp324	1.09461	1.07721	1.54031	1.03138	1.41517	1.14567	1.14851	1.20582	55.3173	-0.267731	0.233449	-1.14685	0.251443	0.458324	NOT
ENSMUSG00000004508	6168	90	156	152	160	95	56	250	96	Gab2	1.58921	2.60241	2.41719	2.71869	1.55374	1.05699	4.27554	1.49391	125.846	0.809974	0.206043	3.93109	8.46e-05	0.00100694	UP
ENSMUSG00000004530	9664	314	480	552	546	362	245	759	301	Coro1c	3.5388	5.11069	5.60265	5.92134	3.77876	2.95144	8.28476	2.98955	427.863	0.646655	0.151042	4.2813	1.86e-05	0.000286036	UP
ENSMUSG00000004535	9991	2351	2374	2930	2566	1946	2157	2955	2476	Tax1bp1	25.6287	24.4493	28.7654	26.9173	19.6486	25.1343	31.1992	23.7869	2438.69	-0.0129624	0.113138	-0.114572	0.908784	0.956621	NOT
ENSMUSG00000004540	2100	0	0	1	0	0	0	0	0	Psg17	0	0	0.0467081	0	0	0	0	0	0.108064	0.43757	3.53381	0.123824	0.901455	NA	NOT
ENSMUSG00000004542	3205	0	0	0	0	0	0	0	0	Psg19	0	0	0	0	0	0	0	0	0	NA	NA	NA	NA	NA	NA
ENSMUSG00000004552	3170	21	18	33	19	23	23	34	31	Ctse	0.721511	0.584263	1.0211	0.628172	0.731925	0.844683	1.1314	0.938641	24.8646	-0.205393	0.325256	-0.631479	0.527727	0.71568	NOT
ENSMUSG00000004558	3397	10002	8790	9155	8243	10601	10339	7600	11981	Ndrg2	320.682	266.25	264.347	254.316	314.811	354.33	236.001	338.528	9687.71	-0.622422	0.115376	-5.39473	6.86e-08	2.49e-06	DOWN
ENSMUSG00000004561	3970	103	80	102	91	110	90	98	121	Mettl17	2.82572	2.07346	2.52012	2.40234	2.79512	2.63923	2.60394	2.92544	99.3943	-0.473377	0.166709	-2.83954	0.00451789	0.0246307	NOT
ENSMUSG00000004562	10366	168	192	172	159	199	168	213	206	Arhgef40	1.76515	1.90584	1.62753	1.60757	1.9366	1.88679	2.16752	1.90745	183.839	-0.290149	0.145149	-1.99897	0.0456116	0.143153	NOT
ENSMUSG00000004565	9698	253	275	273	243	325	270	239	335	Pnpla6	2.84133	2.91774	2.76116	2.62608	3.38064	3.24121	2.59963	3.31558	277.532	-0.473654	0.138686	-3.41531	0.000637101	0.00523883	NOT
ENSMUSG00000004567	7555	327	278	368	336	373	318	345	384	Mcoln1	4.71407	3.78622	4.77777	4.66111	4.98049	4.90025	4.81704	4.87858	340.362	-0.362363	0.117438	-3.08558	0.00203157	0.0130263	NOT
ENSMUSG00000004568	13889	489	473	527	440	519	511	451	634	Arhgef18	3.83461	3.50417	3.72178	3.32021	3.76959	4.28327	3.42532	4.38142	506.935	-0.465624	0.120038	-3.87896	0.000104904	0.00119889	NOT
ENSMUSG00000004591	12877	606	555	772	560	562	571	728	671	Pkn2	5.12556	4.4348	5.8805	4.55782	4.40271	5.16234	5.96365	5.00155	622.348	-0.173736	0.123642	-1.40515	0.159976	0.34179	NOT
ENSMUSG00000004609	7771	33	66	83	59	39	36	136	46	Cd33	0.462509	0.873902	1.04764	0.795718	0.506274	0.539325	1.84611	0.568169	59.053	0.862074	0.271012	3.18094	0.00146798	0.0100511	UP
ENSMUSG00000004610	1164	167	383	222	453	340	169	272	193	Etfb	15.626	33.8564	18.7073	40.7877	29.4662	16.9028	24.6497	15.9148	270.098	0.362523	0.279307	1.29794	0.194309	0.389241	NOT
ENSMUSG00000004612	914	14	23	31	25	19	11	20	21	Nkg7	1.66826	2.58927	3.3268	2.86667	2.09703	1.40111	2.30823	2.20531	19.9146	0.338905	0.353403	0.958976	0.337571	0.550459	NOT
ENSMUSG00000004626	4159	425	441	482	439	497	396	505	515	Stxbp2	11.1297	10.9105	11.3676	11.0627	12.055	11.0849	12.8085	11.8854	459.488	-0.252722	0.101354	-2.49345	0.0126509	0.0550621	NOT
ENSMUSG00000004630	1828	0	0	0	0	0	1	0	0	Pcp2	0	0	0	0	0	0.0636867	0	0	0.15317	-1.0051	3.53381	-0.284424	0.776085	NA	NOT
ENSMUSG00000004631	10612	85	94	191	113	122	97	171	99	Sgce	0.872378	0.911436	1.76542	1.116	1.15974	1.06414	1.69979	0.895437	118.29	0.198067	0.221056	0.896002	0.370252	0.583029	NOT
ENSMUSG00000004633	5812	406	482	353	433	395	371	342	431	Chn2	7.60823	8.5333	5.95745	7.80812	6.85598	7.43145	6.2072	7.11785	402.563	-0.262958	0.17084	-1.5392	0.123754	0.289861	NOT
ENSMUSG00000004637	10173	62	88	105	112	73	86	135	88	Wwox	0.663782	0.89008	1.0124	1.15386	0.723889	0.98418	1.39985	0.830291	91.643	0.219591	0.199091	1.10297	0.270041	0.480025	NOT
ENSMUSG00000004642	6076	112	129	169	124	129	99	191	133	Slbp	2.00763	2.18458	2.72823	2.13889	2.14176	1.89689	3.31597	2.10102	132.767	0.0874313	0.166114	0.526331	0.598658	0.769087	NOT
ENSMUSG00000004651	7108	0	0	0	0	0	0	0	0	Tyr	0	0	0	0	0	0	0	0	0	NA	NA	NA	NA	NA	NA
ENSMUSG00000004654	3487	1	2	0	1	1	1	2	2	Ghrhr	0.0312342	0.0590165	0	0.0300561	0.0289298	0.0333867	0.0605025	0.0550522	1.24054	-0.261764	1.32244	-0.19794	0.843092	NA	NOT
ENSMUSG00000004655	2627	1192	1665	2490	2249	1532	1149	2283	1450	Aqp1	49.4196	65.2153	92.9717	89.725	58.8297	50.9196	91.6729	52.9791	1698.32	0.424044	0.125091	3.38988	0.000699232	0.0056451	NOT
ENSMUSG00000004661	7976	38	52	59	48	57	39	70	53	Arid3b	0.518897	0.670832	0.725569	0.630725	0.720921	0.569252	0.925781	0.637805	50.9981	0.0113838	0.229584	0.0495845	0.960454	0.981651	NOT
ENSMUSG00000004665	2460	71	88	162	141	111	68	163	83	Cnn2	3.14345	3.68081	6.45939	6.00715	4.55183	3.2181	6.98953	3.23847	107.047	0.446524	0.218462	2.04394	0.0409595	0.132144	NOT
ENSMUSG00000004667	2670	225	269	298	319	293	198	324	299	Polr2e	9.17813	10.3666	10.9475	12.5217	11.0702	8.63335	12.8006	10.7487	273.661	-0.0189682	0.136168	-0.1393	0.889213	0.947122	NOT
ENSMUSG00000004668	19737	2	1	2	0	3	0	6	0	Abca13	0.0110365	0.00521332	0.00993941	0	0.0153334	0	0.0320675	0	1.64167	0.515429	1.42367	0.362042	0.717321	NA	NOT
ENSMUSG00000004677	7496	553	621	773	731	631	452	857	640	Myo9b	8.03486	8.52428	10.1149	10.2205	8.49176	7.01995	12.06	8.19497	643.52	0.109303	0.112561	0.971052	0.331522	0.544556	NOT
ENSMUSG00000004698	14838	44	29	45	43	23	29	62	35	Hdac9	0.322969	0.201103	0.297474	0.303723	0.156369	0.227535	0.44077	0.226407	37.9167	0.149823	0.303816	0.493136	0.621917	0.785174	NOT
ENSMUSG00000004707	3307	47	59	112	85	30	26	146	41	Ly9	1.54791	1.83575	3.32197	2.69382	0.915135	0.915302	4.65708	1.19	64.1038	1.18062	0.285854	4.13013	3.63e-05	0.00049931	UP
ENSMUSG00000004709	4876	12	10	15	16	10	10	20	11	Cd244a	0.268041	0.211024	0.301744	0.343907	0.206888	0.23876	0.432675	0.216534	12.703	0.211839	0.425307	0.498085	0.618424	0.782758	NOT
ENSMUSG00000004730	3238	477	511	786	617	533	369	944	455	Adgre1	16.0444	16.2383	23.8099	19.9707	16.6054	13.2671	30.7532	13.4875	568.124	0.344205	0.165146	2.08425	0.0371376	0.12321	NOT
ENSMUSG00000004748	1738	147	153	146	179	176	126	143	194	Mtfp1	9.21193	9.0581	8.23976	10.7941	10.2155	8.44007	8.67924	10.7139	157.451	-0.316271	0.168506	-1.8769	0.0605312	0.175051	NOT
ENSMUSG00000004768	8285	74	121	162	121	69	98	150	90	Rab23	0.972797	1.50276	1.91794	1.53065	0.840146	1.37708	1.90983	1.04267	107.683	0.447408	0.195137	2.29279	0.0218599	0.0830687	NOT
ENSMUSG00000004771	2992	545	546	700	622	523	502	757	541	Rab11a	19.8389	18.777	22.9482	21.7878	17.6335	19.5329	26.6888	17.3553	583.465	0.0219271	0.114824	0.190963	0.848554	0.924813	NOT
ENSMUSG00000004788	1885	183	325	230	270	222	190	236	225	Eif2b2	10.5736	17.7406	11.9682	15.0119	11.8806	11.7346	13.2067	11.4569	232.531	0.104357	0.177329	0.588493	0.556201	0.735825	NOT
ENSMUSG00000004789	9559	4061	3918	4550	3101	3992	3675	4029	4165	Dlst	46.2704	42.1743	46.6886	33.9996	42.1285	44.7579	44.4611	41.8215	3927.94	-0.314785	0.120092	-2.6212	0.00876208	0.041639	NOT
ENSMUSG00000004791	2903	1	1	1	3	1	0	0	1	Pgf	0.0375177	0.0354445	0.0337882	0.108307	0.0347497	0	0	0.0330636	0.978923	0.509842	1.56459	0.325863	0.744528	NA	NOT
ENSMUSG00000004798	5977	804	382	743	599	670	690	562	816	Ulk2	14.6506	6.57621	12.1932	10.5033	11.3081	13.4397	9.91855	13.104	663.996	-0.675767	0.174292	-3.87721	0.000105662	0.0012051	DOWN
ENSMUSG00000004814	1295	66	33	59	84	52	36	87	48	Ccl24	5.55082	2.62204	4.46883	6.7982	4.05071	3.23637	7.08671	3.55769	56.9602	0.0872856	0.304961	0.286219	0.77471	0.881253	NOT
ENSMUSG00000004815	7189	191	237	201	206	278	161	177	218	Dgkq	2.89366	3.39215	2.74245	3.00319	3.90099	2.60725	2.59717	2.91062	208.281	-0.310489	0.187181	-1.65877	0.0971631	0.244752	NOT
ENSMUSG00000004821	763	0	0	0	0	0	0	0	1	Tmed11	0	0	0	0	0	0	0	0.125798	0.122645	-1.0051	3.53381	-0.284424	0.776085	NA	NOT
ENSMUSG00000004837	1793	41	88	73	60	53	34	66	68	Grap	2.4905	5.05008	3.9935	3.50716	2.9819	2.20762	3.88292	3.6402	58.8386	0.290981	0.247246	1.17689	0.23924	0.44406	NOT
ENSMUSG00000004842	3891	0	0	0	0	0	1	2	0	Pou1f1	0	0	0	0	0	0.0299202	0.0542206	0	0.361418	0.399702	2.98906	0.133722	0.893623	NA	NOT
ENSMUSG00000004843	1928	344	649	635	689	406	365	665	412	Chmp2b	19.4328	34.6364	32.3056	37.4538	21.2431	22.04	36.384	20.511	506.393	0.510261	0.116419	4.38297	1.17e-05	0.00019462	UP
ENSMUSG00000004846	4519	198	197	248	230	272	217	223	236	Plod3	4.77206	4.48559	5.38296	5.33421	6.0719	5.5904	5.20544	5.01264	227.125	-0.321847	0.143458	-2.24348	0.0248656	0.0913599	NOT
ENSMUSG00000004849	2198	258	312	393	466	347	251	430	271	Ap1s1	12.7842	14.6057	17.5379	22.2199	15.9257	13.2945	20.6365	11.8342	333.966	0.223243	0.1601	1.3944	0.163197	0.346388	NOT
ENSMUSG00000004864	3150	9	14	25	11	16	14	34	16	Mapk13	0.311182	0.457312	0.778468	0.365988	0.512398	0.517419	1.13858	0.487536	16.7261	0.309096	0.427863	0.722417	0.470038	0.669501	NOT
ENSMUSG00000004865	12376	290	258	357	304	267	198	336	280	Srpk1	2.55212	2.14504	2.82943	2.57441	2.17635	1.86256	2.86388	2.17157	281.686	-0.00522662	0.142082	-0.0367859	0.970656	0.985743	NOT
ENSMUSG00000004872	6187	0	0	0	0	0	0	0	0	Pax3	0	0	0	0	0	0	0	0	0	NA	NA	NA	NA	NA	NA
ENSMUSG00000004880	4761	130	244	167	212	166	115	235	116	Lbr	2.97391	5.27336	3.44057	4.66683	3.51729	2.81206	5.20673	2.3386	169.212	0.425557	0.19658	2.1648	0.0304029	0.106284	NOT
ENSMUSG00000004885	1322	0	0	0	1	0	0	0	0	Crabp2	0	0	0	0.079278	0	0	0	0	0.117714	0.43757	3.53381	0.123824	0.901455	NA	NOT
ENSMUSG00000004891	6416	12	14	67	45	30	5	72	16	Nes	0.203704	0.224522	1.02429	0.735076	0.471688	0.0907258	1.18376	0.239361	30.116	1.36698	0.497431	2.74808	0.0059945	0.0308265	UP
ENSMUSG00000004892	4064	0	1	0	0	0	0	0	0	Bcan	0	0.0253187	0	0	0	0	0	0	0.121042	0.43757	3.53381	0.123824	0.901455	NA	NOT
ENSMUSG00000004894	2371	0	0	0	1	0	0	0	0	Hapln2	0	0	0	0.0442031	0	0	0	0	0.117714	0.43757	3.53381	0.123824	0.901455	NA	NOT
ENSMUSG00000004895	2099	225	240	266	263	271	189	261	262	Prcc	11.6749	11.7651	12.4303	13.1319	13.0243	10.4827	13.1167	11.9808	244.727	-0.15403	0.130446	-1.18079	0.237685	0.44209	NOT
ENSMUSG00000004896	6342	99	120	133	106	138	91	146	139	Rrnad1	1.70017	1.94693	2.05701	1.75172	2.19508	1.67048	2.42841	2.10371	119.829	-0.163363	0.171287	-0.953736	0.340217	0.553576	NOT
ENSMUSG00000004897	2873	1288	1702	1913	2289	1818	1301	1814	1719	Hdgf	48.8274	60.9564	65.3117	83.5015	63.8346	52.719	66.6035	57.4298	1703.92	0.0643438	0.142741	0.450772	0.652154	0.804079	NOT
ENSMUSG00000004902	1911	6	10	7	7	6	6	5	16	Slc25a18	0.341959	0.538437	0.359293	0.383903	0.31673	0.365524	0.275997	0.80363	7.837	-0.474395	0.574814	-0.825301	0.409201	0.618085	NOT
ENSMUSG00000004929	5059	97	96	114	142	108	91	151	100	Thop1	2.08829	1.95255	2.2103	2.94176	2.15356	2.09412	3.14853	1.89728	110.61	0.0580369	0.184846	0.313975	0.75354	0.869353	NOT
ENSMUSG00000004931	2890	307	305	365	286	488	270	240	356	Apba3	11.5697	10.8592	12.3882	10.3718	17.0341	10.8766	8.76009	11.8236	327.999	-0.516656	0.192715	-2.68093	0.00734171	0.0361975	DOWN
ENSMUSG00000004933	4594	6	19	20	17	16	11	30	13	Matk	0.142247	0.425557	0.427022	0.387831	0.35134	0.278758	0.688851	0.271612	15.8263	0.61857	0.408644	1.51371	0.130099	0.299527	NOT
ENSMUSG00000004934	3695	185	241	191	220	222	186	239	183	Pias4	5.45306	6.71117	5.07026	6.24011	6.06089	5.86035	6.82305	4.75372	207.096	-0.0822138	0.160631	-0.511816	0.60878	0.775442	NOT
ENSMUSG00000004936	3391	470	449	572	538	519	394	550	540	Map2k1	15.0957	13.6243	16.5455	16.628	15.4397	13.5268	17.1092	15.2849	498.583	-0.145761	0.110653	-1.31728	0.187745	0.381258	NOT
ENSMUSG00000004937	2876	712	860	1077	954	885	702	1064	933	Sgta	26.9634	30.7684	36.7315	34.7651	31.0422	28.4167	39.0255	31.1379	883.414	0.0118155	0.0995593	0.118678	0.905531	0.955168	NOT
ENSMUSG00000004939	1854	0	0	0	0	0	0	0	0	Nmrk2	0	0	0	0	0	0	0	0	0	NA	NA	NA	NA	NA	NA
ENSMUSG00000004945	1837	232	284	291	314	267	223	309	261	Tmem242	13.755	15.9076	15.538	17.9145	14.6622	14.1326	17.7437	13.6373	269.311	0.00594496	0.124204	0.0478645	0.961824	0.982516	NOT
ENSMUSG00000004947	7032	57	68	68	74	65	51	98	50	Dtx2	0.882834	0.995006	0.948509	1.1029	0.932465	0.844338	1.47009	0.682477	65.1114	0.176165	0.21685	0.812381	0.416573	0.624378	NOT
ENSMUSG00000004948	1323	0	0	0	0	0	0	0	0	Zp3	0	0	0	0	0	0	0	0	0	NA	NA	NA	NA	NA	NA
ENSMUSG00000004951	1031	95	103	325	731	43	91	309	78	Hspb1	10.0357	10.2795	30.9198	74.3093	4.20734	10.2756	31.6151	7.26161	208.501	1.95852	0.604049	3.24232	0.00118561	0.00853731	UP
ENSMUSG00000004952	7485	38	71	94	85	53	42	111	39	Rasa4	0.552936	0.976027	1.23182	1.19018	0.714302	0.653255	1.56432	0.500115	63.9203	0.777707	0.221669	3.50842	0.000450782	0.00397014	UP
ENSMUSG00000004961	2380	0	0	2	1	0	0	2	0	Syt5	0	0	0.0824261	0.0440359	0	0	0.0886438	0	0.54209	2.43759	2.21615	1.09992	0.271368	NA	NOT
ENSMUSG00000004980	6584	3018	2979	3655	3271	3322	2835	3655	3272	Hnrnpa2b1	49.9243	46.5561	54.4514	52.0685	50.8988	50.1289	58.5589	47.7002	3223.76	-0.16233	0.0825278	-1.96697	0.0491864	0.151192	NOT
ENSMUSG00000004988	1957	0	1	2	1	0	0	0	0	Fxyd4	0	0.0525781	0.100242	0.0535542	0	0	0	0	0.454884	2.17075	2.36565	0.917615	0.35882	NA	NOT
ENSMUSG00000004994	2694	58	71	59	62	64	48	78	57	Ccdc130	2.34484	2.71179	2.14816	2.41201	2.39652	2.07429	3.05416	2.03083	61.4165	-0.0305253	0.212464	-0.143673	0.885759	0.945015	NOT
ENSMUSG00000004996	3273	303	328	304	315	360	256	250	355	Mri1	10.0828	10.3115	9.11044	10.0867	11.0957	9.10582	8.05729	10.4107	308.952	-0.355689	0.156988	-2.26571	0.023469	0.0874872	NOT
ENSMUSG00000005034	8772	771	753	897	780	651	735	858	897	Prkacb	9.57279	8.83267	10.0301	9.31923	7.48653	9.7547	10.3177	9.81501	787.299	-0.178751	0.1199	-1.49083	0.136005	0.307613	NOT
ENSMUSG00000005043	4414	124	161	138	155	131	118	155	130	Sgsh	3.05965	3.75309	3.06661	3.6803	2.9939	3.11225	3.7042	2.82688	137.705	-0.00340384	0.159664	-0.0213187	0.982991	0.991046	NOT
ENSMUSG00000005045	9583	1	3	1	2	2	3	5	1	Chd5	0.0113653	0.0322118	0.0102355	0.0218732	0.0210536	0.0364456	0.0550381	0.010016	2.21512	0.341104	1.02558	0.332596	0.73944	NA	NOT
ENSMUSG00000005054	603	206	378	410	468	338	243	464	269	Cstb	37.2077	64.5015	66.6927	81.3416	56.5454	46.9153	81.1701	42.8185	337.51	0.425124	0.157304	2.70257	0.00688061	0.0344173	NOT
ENSMUSG00000005057	5406	33	47	49	45	23	24	75	28	Sh2b2	0.664846	0.894576	0.889061	0.87241	0.42919	0.516845	1.46346	0.49714	38.9267	0.706142	0.277443	2.54518	0.0109221	0.0491625	UP
ENSMUSG00000005069	3943	1637	1892	1813	1827	2133	1405	1366	1750	Pex5	45.2173	49.373	45.1006	48.5619	54.571	41.4834	36.5443	42.5999	1725.97	-0.271178	0.163781	-1.65573	0.0977759	0.245839	NOT
ENSMUSG00000005078	2692	224	247	335	329	240	199	338	263	Jkamp	9.06267	9.44099	12.2062	12.8087	8.99361	8.60604	13.2445	9.3773	266.247	0.149646	0.131533	1.13771	0.255243	0.46277	NOT
ENSMUSG00000005087	6776	281	378	564	422	282	224	794	273	Cd44	4.51664	5.74003	8.16427	6.52715	4.1983	3.84857	12.3607	3.86711	383.978	0.723289	0.19053	3.7962	0.000146932	0.00160169	UP
ENSMUSG00000005089	13133	2059	1810	430	597	1996	1782	222	2520	Slc1a2	17.0756	14.1811	3.21156	4.76425	15.3319	15.7968	1.78314	18.4176	1496.89	-1.6648	0.653607	-2.54709	0.0108625	0.048973	DOWN
ENSMUSG00000005102	7457	134	199	158	137	149	149	189	147	Eif2ak4	1.95715	2.7459	2.07828	1.92549	2.01567	2.3262	2.67358	1.89213	156.514	-0.0464395	0.176256	-0.263477	0.792183	0.892206	NOT
ENSMUSG00000005103	8899	617	682	913	725	627	564	996	675	Wdr1	7.55139	7.88567	10.0633	8.53849	7.10762	7.37842	11.8063	7.28047	709.83	0.125984	0.115567	1.09014	0.275654	0.486335	NOT
ENSMUSG00000005107	5083	481	307	422	360	474	488	390	603	Slc2a9	10.3064	6.21461	8.14337	7.42278	9.40711	11.177	8.09356	11.3866	445.337	-0.753444	0.122821	-6.13451	8.54e-10	5.56e-08	DOWN
ENSMUSG00000005124	5565	30	8	42	26	19	24	24	38	Ccn4	0.587137	0.147918	0.740279	0.489658	0.344419	0.502078	0.454927	0.655413	26.1754	-0.444568	0.413318	-1.07561	0.282103	0.493761	NOT
ENSMUSG00000005125	6596	231	166	459	307	246	182	519	273	Ndrg1	3.8143	2.58954	6.82564	4.878	3.76229	3.2123	8.30007	3.97264	286.508	0.337056	0.25303	1.33208	0.182835	0.374383	NOT
ENSMUSG00000005131	3539	2	1	1	1	1	1	1	1	4930550C14Rik	0.0615506	0.0290747	0.027716	0.0296145	0.0285048	0.0328961	0.0298068	0.0271217	1.14312	-0.611547	1.33003	-0.459798	0.645661	NA	NOT
ENSMUSG00000005142	8026	1676	1952	2081	1826	1879	1390	2316	2170	Man2b1	22.7435	25.0251	25.4322	23.8444	23.6171	20.1623	30.4393	25.9512	1882.31	-0.0737353	0.10475	-0.703919	0.481483	0.678455	NOT
ENSMUSG00000005148	5201	12	8	14	8	6	4	27	6	Klf5	0.251291	0.15827	0.26403	0.161208	0.116376	0.0895361	0.547611	0.110729	10.081	0.709754	0.568795	1.24782	0.212097	0.411903	NOT
ENSMUSG00000005150	2818	145	153	177	178	223	128	129	216	Wdr83	5.60415	5.58658	6.1609	6.62008	7.98292	5.28803	4.82885	7.35715	168.136	-0.420124	0.196779	-2.13501	0.0327604	0.112404	NOT
ENSMUSG00000005161	3050	782	911	1225	1093	898	807	1094	1018	Prdx2	27.9248	30.7336	39.3956	37.5582	29.7012	30.8034	37.8367	32.0365	963.25	0.0215268	0.108085	0.199165	0.842134	0.921626	NOT
ENSMUSG00000005198	7067	750	1005	1056	803	909	750	1210	1043	Polr2a	11.5587	14.6328	14.6568	11.9087	12.9756	12.3552	18.0612	14.166	925.536	-0.0406688	0.12565	-0.323667	0.74619	0.865412	NOT
ENSMUSG00000005202	1506	0	0	1	0	0	0	0	0	Shbg	0	0	0.0651308	0	0	0	0	0	0.108064	0.43757	3.53381	0.123824	0.901455	NA	NOT
ENSMUSG00000005204	3632	384	448	521	544	488	351	482	416	Senp3	11.5151	12.6919	14.0703	15.6977	13.5541	11.2509	13.999	10.9937	448.459	0.00611077	0.131577	0.0464426	0.962957	0.982999	NOT
ENSMUSG00000005220	5400	21	26	53	25	11	17	29	12	Corin	0.423554	0.495422	0.962706	0.485211	0.205493	0.366505	0.566499	0.213297	23.3502	0.816324	0.39002	2.09303	0.0363464	0.121373	UP
ENSMUSG00000005225	7005	583	553	785	635	729	449	785	532	Plekha8	9.06449	8.12293	10.9919	9.50057	10.4983	7.46214	11.8211	7.28954	621.26	-0.0217068	0.153038	-0.141839	0.887207	0.945961	NOT
ENSMUSG00000005232	1974	6	7	24	23	7	1	22	8	G6pc2	0.331045	0.364877	1.19255	1.22114	0.357725	0.0589764	1.17563	0.388991	11.3492	1.51651	0.564979	2.68419	0.00727049	0.0359093	UP
ENSMUSG00000005233	3188	94	194	340	210	114	73	333	84	Spc25	3.21139	6.26151	10.461	6.90375	3.60732	2.66581	11.0185	2.52905	169.493	1.26377	0.207468	6.09139	1.12e-09	7.01e-08	UP
ENSMUSG00000005237	14968	4	7	19	4	5	5	14	6	Dnah2	0.0291058	0.0481205	0.124509	0.0280079	0.033698	0.0388894	0.0986642	0.0384755	7.55864	0.833192	0.615114	1.35453	0.175567	0.363891	NOT
ENSMUSG00000005251	3591	98	128	132	118	127	98	151	90	Ripk4	2.97231	3.66767	3.60554	3.4439	3.56768	3.17714	4.43564	2.4056	116.094	0.0685842	0.179138	0.382858	0.701825	0.837427	NOT
ENSMUSG00000005262	4336	511	584	715	621	588	476	636	579	Ufd1	12.8356	13.8586	16.1744	15.0102	13.68	12.7804	15.4726	12.817	581.368	-0.0339396	0.10439	-0.325125	0.745087	0.864826	NOT
ENSMUSG00000005267	7632	9	10	16	9	13	4	23	6	Zfp287	0.128436	0.134821	0.205633	0.123591	0.171832	0.0610164	0.317896	0.0754588	10.7353	0.561963	0.51734	1.08625	0.277367	0.48831	NOT
ENSMUSG00000005268	15339	896	965	961	777	1189	787	574	1235	Prlr	6.362	6.4733	6.14523	5.30895	7.81957	5.97314	3.94739	7.72799	928.016	-0.581382	0.193522	-3.00421	0.00266271	0.0161537	DOWN
ENSMUSG00000005299	9650	753	774	928	765	992	682	650	906	Letm1	8.49866	8.25295	9.43262	8.30842	10.3701	8.22777	7.10528	9.01151	805.1	-0.367136	0.147464	-2.48967	0.0127862	0.055465	NOT
ENSMUSG00000005312	4406	2524	2280	3113	2477	2470	2221	2818	2729	Ubqln1	62.3918	53.2459	69.3021	58.9204	56.5523	58.6853	67.4671	59.4506	2556.81	-0.182885	0.0991608	-1.84433	0.0651354	0.18482	NOT
ENSMUSG00000005320	3542	350	331	363	253	353	333	319	428	Fgfr4	10.7622	9.61557	10.0524	7.48611	10.0537	10.9451	9.5003	11.5982	342.093	-0.489955	0.136924	-3.57829	0.000345845	0.00320853	NOT
ENSMUSG00000005338	7248	49	83	68	90	74	50	76	72	Cadm3	0.73631	1.1783	0.920243	1.30139	1.02994	0.803114	1.10609	0.953479	69.1114	0.105624	0.220253	0.47956	0.63154	0.790985	NOT
ENSMUSG00000005339	998	0	0	0	0	0	0	0	0	Fcer1a	0	0	0	0	0	0	0	0	0	NA	NA	NA	NA	NA	NA
ENSMUSG00000005354	4208	1535	1727	2019	1888	1650	1507	2059	1935	Txn2	39.7297	42.2291	47.0622	47.023	39.5554	41.693	51.615	44.1369	1767.78	-0.0654713	0.0842632	-0.776986	0.437167	0.642487	NOT
ENSMUSG00000005355	2394	0	0	0	0	0	0	0	0	Casp14	0	0	0	0	0	0	0	0	0	NA	NA	NA	NA	NA	NA
ENSMUSG00000005357	2152	0	2	1	1	0	0	4	0	Slc1a6	0	0.0956276	0.0455795	0.0487015	0	0	0.196071	0	0.884358	3.13829	1.75883	1.7843	0.0743741	NA	NOT
ENSMUSG00000005360	8537	6	10	17	15	9	6	9	6	Slc1a3	0.0765471	0.120529	0.195324	0.184149	0.106349	0.0818222	0.111207	0.0674595	9.4445	0.638005	0.508895	1.25371	0.209949	0.409619	NOT
ENSMUSG00000005362	6982	349	438	410	424	377	368	438	395	Crbn	5.44413	6.4549	5.75991	6.36459	5.44703	6.13611	6.61743	5.43018	396.975	-0.0819247	0.120767	-0.678371	0.497537	0.691139	NOT
ENSMUSG00000005364	3575	0	0	2	1	1	0	2	0	Il5ra	0	0	0.0548739	0.0293162	0.0282177	0	0.0590132	0	0.673788	1.72008	1.93389	0.889436	0.373769	NA	NOT
ENSMUSG00000005370	4346	158	162	156	154	130	149	177	163	Msh6	3.95959	3.83549	3.52084	3.71377	3.01753	3.99137	4.29614	3.59994	155.447	-0.172792	0.156958	-1.10088	0.27095	0.481083	NOT
ENSMUSG00000005371	4397	386	470	485	440	369	399	559	435	Fbxo11	9.56123	10.9986	10.8192	10.4877	8.4658	10.5643	13.4107	9.49576	437.302	0.0100576	0.119753	0.0839867	0.933067	0.96792	NOT
ENSMUSG00000005373	5538	923	830	892	940	1205	829	730	1129	Mlxipl	18.1523	15.4213	15.7988	17.7893	21.9499	17.4272	13.9048	19.5676	939.032	-0.535412	0.14156	-3.78222	0.000155437	0.00167747	DOWN
ENSMUSG00000005374	7855	306	347	366	301	387	283	334	347	Tbl2	4.24286	4.54547	4.57032	4.0161	4.97007	4.19436	4.48534	4.24014	332.188	-0.250556	0.129653	-1.93251	0.0532967	0.159833	NOT
ENSMUSG00000005378	3386	228	252	256	237	321	207	249	310	Bud23	7.33383	7.65789	7.41591	7.33577	9.56348	7.11719	7.75725	8.78763	256.445	-0.370181	0.144569	-2.56058	0.0104497	0.0476726	NOT
ENSMUSG00000005397	6943	652	1140	1732	1362	680	566	2310	643	Nid1	10.2278	16.8948	24.4688	20.5596	9.88007	9.49062	35.0962	8.88916	1073.92	1.06189	0.169766	6.25503	3.97e-10	2.92e-08	UP
ENSMUSG00000005410	3993	13	94	78	65	36	8	112	22	Mcm5	0.35459	2.42228	1.91605	1.70608	0.909497	0.233247	2.95879	0.528835	49.6352	1.88117	0.345457	5.44547	5.17e-08	1.92e-06	UP
ENSMUSG00000005413	1751	393	814	884	826	453	394	1639	532	Hmox1	24.445	47.8337	49.5197	49.44	26.0982	26.196	98.7388	29.1623	703.139	0.937772	0.194281	4.82688	1.39e-06	3.19e-05	UP
ENSMUSG00000005417	13327	1381	1519	1723	1538	1553	1329	1742	1869	Mprip	11.2861	11.7279	12.6813	12.0951	11.7554	11.6096	13.7883	13.4609	1566.36	-0.18746	0.0913407	-2.05232	0.040139	0.13006	NOT
ENSMUSG00000005442	10294	397	693	578	663	570	401	760	537	Cic	4.20039	6.92699	5.50751	6.75015	5.58584	4.53509	7.78798	5.00711	562.377	0.228541	0.14117	1.6189	0.105468	0.259014	NOT
ENSMUSG00000005447	2107	15	21	40	29	28	12	36	19	Pafah1b3	0.775371	1.02553	1.86212	1.44251	1.34058	0.663043	1.80233	0.865538	24.0174	0.486279	0.347388	1.39981	0.161569	0.344189	NOT
ENSMUSG00000005465	3495	20	27	36	27	30	11	32	17	Il27ra	0.623255	0.794899	1.01034	0.809657	0.865909	0.366413	0.965824	0.466873	24.2361	0.367194	0.342001	1.07366	0.282974	0.494471	NOT
ENSMUSG00000005469	2488	685	703	800	762	736	720	726	872	Prkaca	29.9863	29.0737	31.5392	32.0988	29.8418	33.6905	30.7809	33.6405	748.492	-0.289652	0.108309	-2.67432	0.00748815	0.0367582	NOT
ENSMUSG00000005470	2338	3	22	16	11	7	3	24	4	Asf1b	0.139753	0.968219	0.671254	0.493097	0.302031	0.149383	1.08283	0.164215	10.4847	1.82381	0.547852	3.32902	0.000871527	0.00673605	UP
ENSMUSG00000005474	1203	0	0	0	0	0	0	0	0	Myl10	0	0	0	0	0	0	0	0	0	NA	NA	NA	NA	NA	NA
ENSMUSG00000005481	5155	171	288	297	363	232	169	350	182	Ddx39	3.61285	5.74856	5.65118	7.3801	4.54002	3.81666	7.162	3.38875	249.228	0.503158	0.155602	3.23361	0.00122235	0.00871621	UP
ENSMUSG00000005483	3204	184	211	365	318	288	197	298	268	Dnajb1	6.25473	6.77619	11.1741	10.402	9.06772	7.15812	9.81113	8.02859	260.607	0.068968	0.179814	0.383553	0.70131	0.837295	NOT
ENSMUSG00000005493	6895	0	3	3	0	0	2	2	1	Msh4	0	0.0447695	0.0426775	0	0	0.0337692	0.0305979	0.0139207	1.32455	1.09939	1.48848	0.738598	0.460151	NA	NOT
ENSMUSG00000005501	11871	588	503	768	614	680	514	703	672	Usp40	5.39477	4.3599	6.34579	5.42082	5.77856	5.04082	6.24688	5.43349	623.745	-0.208327	0.124819	-1.66904	0.0951102	0.241275	NOT
ENSMUSG00000005503	2877	0	0	0	0	0	0	0	0	Evx1	0	0	0	0	0	0	0	0	0	NA	NA	NA	NA	NA	NA
ENSMUSG00000005505	3139	66	53	47	66	42	51	62	66	Kbtbd4	2.29	1.73732	1.46865	2.20362	1.34976	1.89149	2.08351	2.01813	56.5505	-0.261753	0.244463	-1.07073	0.284292	0.495751	NOT
ENSMUSG00000005506	8446	1582	1408	1731	1648	1522	1434	1661	1688	Celf1	20.4004	17.1533	20.1028	20.4499	18.1787	19.7662	20.745	19.1831	1576.71	-0.234224	0.0960919	-2.4375	0.0147893	0.0619696	NOT
ENSMUSG00000005510	2178	775	895	935	837	994	741	884	979	Ndufs3	38.7549	42.2825	42.1081	40.2765	46.0391	39.6082	42.8144	43.1441	874.728	-0.24836	0.10794	-2.30091	0.0213965	0.0817871	NOT
ENSMUSG00000005514	4021	6508	11764	8790	10250	10320	7081	9064	9779	Por	176.277	301.035	214.421	267.162	258.907	205.015	237.783	233.43	9093.53	-0.0144354	0.168444	-0.0856984	0.931706	0.967238	NOT
ENSMUSG00000005533	16791	108	154	134	106	103	84	202	72	Igf1r	0.700536	0.943712	0.78278	0.661628	0.618812	0.582409	1.26902	0.411579	117.265	0.399941	0.229436	1.74315	0.0813076	0.215981	NOT
ENSMUSG00000005534	13746	3066	2082	2558	1782	2537	2971	2128	3305	Insr	24.2929	15.5848	18.2531	13.5868	18.6184	25.1624	16.3302	23.0777	2590.7	-0.764728	0.137665	-5.55497	2.78e-08	1.14e-06	DOWN
ENSMUSG00000005540	3092	3	5	4	5	6	5	1	5	Fcer2a	0.105673	0.16639	0.126891	0.169479	0.195754	0.188259	0.0341158	0.155213	4.32642	-0.602625	0.745403	-0.808456	0.418828	0.626681	NOT
ENSMUSG00000005547	2073	2521	3602	2499	5491	1142	1334	3275	1960	Cyp2a5	132.451	178.789	118.244	277.611	55.5731	74.9172	166.651	90.7515	2647.35	0.827967	0.385816	2.14601	0.0318719	0.110163	UP
ENSMUSG00000005553	3761	6	4	14	20	4	10	30	7	Atp4a	0.173752	0.109434	0.365121	0.557328	0.107289	0.309544	0.841421	0.178645	11.2461	1.00662	0.592568	1.69875	0.0893666	0.231299	NOT
ENSMUSG00000005566	4158	673	836	942	930	839	686	982	837	Trim28	17.6284	20.6879	22.2217	23.4414	20.3552	19.2072	24.9128	19.3214	828.724	0.00217433	0.0975106	0.0222984	0.98221	0.990732	NOT
ENSMUSG00000005575	2357	384	452	542	539	547	367	492	424	Ube2m	17.7441	19.7321	22.5554	23.967	23.4113	18.1272	22.0192	17.2665	462.868	-0.043835	0.142845	-0.306871	0.758941	0.872496	NOT
ENSMUSG00000005580	5197	523	670	300	263	462	538	307	644	Adcy9	10.9605	13.2653	5.66213	5.3038	8.96783	12.0519	6.23133	11.8941	473.115	-0.750535	0.281028	-2.67068	0.00756974	0.0370724	DOWN
ENSMUSG00000005583	15715	74	83	106	85	56	71	122	66	Mef2c	0.512862	0.54345	0.661612	0.566877	0.359478	0.52598	0.818918	0.403113	81.0874	0.269701	0.207211	1.30158	0.193061	0.387432	NOT
ENSMUSG00000005609	8000	399	438	606	498	424	384	637	422	Ctr9	5.43208	5.63352	7.43009	6.52415	5.34655	5.58813	8.39933	5.06313	466.656	0.127179	0.121694	1.04507	0.295991	0.508512	NOT
ENSMUSG00000005610	10166	6321	6296	7968	6738	5999	5973	7869	6953	Eif4g2	67.7203	63.725	76.8795	69.4649	59.5288	68.4018	81.6516	65.6476	6693.01	-0.095477	0.09218	-1.03577	0.300311	0.512821	NOT
ENSMUSG00000005611	6827	35	29	74	41	40	31	93	28	Mrvi1	0.558369	0.437083	1.0632	0.629417	0.591055	0.528636	1.43697	0.393663	44.4486	0.505533	0.335599	1.50636	0.131975	0.302269	NOT
ENSMUSG00000005615	7412	1099	1111	1169	1168	1045	982	1086	1256	Pcyt1a	16.149	15.4232	15.47	16.5155	14.2226	15.4242	15.4557	16.2649	1109.88	-0.227388	0.106968	-2.12576	0.0335231	0.114339	NOT
ENSMUSG00000005621	7412	468	635	542	402	584	498	519	678	Zfp592	6.87691	8.81523	7.17258	5.68427	7.94832	7.82202	7.3863	8.77993	539.749	-0.356401	0.162273	-2.19631	0.0280701	0.100143	NOT
ENSMUSG00000005625	2808	1431	2010	2015	1707	1852	1331	1527	1791	Psmd4	55.5042	73.6537	70.3865	63.7119	66.5337	55.1831	57.3637	61.2203	1692.09	-0.085955	0.144484	-0.594908	0.551905	0.732383	NOT
ENSMUSG00000005628	1717	3	3	1	3	3	6	3	2	Tmod4	0.190298	0.179782	0.057127	0.18312	0.176258	0.406824	0.184309	0.111804	3.1231	-0.790956	0.875619	-0.903311	0.366361	0.579175	NOT
ENSMUSG00000005640	5714	0	0	1	0	0	0	0	1	Insrr	0	0	0.0171661	0	0	0	0	0.016798	0.230709	-0.283769	3.42151	-0.0829368	0.933902	NA	NOT
ENSMUSG00000005649	2526	0	0	1	0	0	0	0	0	Cabp5	0	0	0.038831	0	0	0	0	0	0.108064	0.43757	3.53381	0.123824	0.901455	NA	NOT
ENSMUSG00000005656	2998	254	225	385	253	205	243	385	273	Snx6	9.22752	7.72229	12.5962	8.8445	6.89795	9.43626	13.5464	8.74033	272.561	0.0540803	0.181495	0.297971	0.765725	0.876593	NOT
ENSMUSG00000005667	3487	13	20	27	26	15	8	24	12	Mthfd2	0.406045	0.590165	0.759492	0.781458	0.433948	0.267093	0.72603	0.330313	17.421	0.736475	0.372249	1.97845	0.0478784	0.148252	UP
ENSMUSG00000005672	8911	154	176	303	221	162	138	281	147	Kit	1.88225	2.03227	3.33525	2.59926	1.83395	1.80293	3.3264	1.58339	191.741	0.410704	0.17043	2.40981	0.0159609	0.0657669	NOT
ENSMUSG00000005674	5135	131	164	97	91	248	177	102	218	Tomm40l	2.77852	3.28624	1.85286	1.85731	4.87202	4.0129	2.09534	4.07486	156.82	-1.02861	0.248059	-4.14661	3.37e-05	0.000471259	DOWN
ENSMUSG00000005677	4414	381	278	254	195	577	388	195	580	Nr1i3	9.40103	6.48049	5.64434	4.63006	13.1869	10.2335	4.66012	12.6122	365.139	-1.32357	0.183401	-7.21678	5.32e-13	9.25e-11	DOWN
ENSMUSG00000005681	537	12115	12320	9978	11460	14894	11086	8962	12883	Apoa2	2457.15	2360.65	1822.56	2236.63	2797.92	2403.4	1760.46	2302.71	11815.6	-0.521486	0.156318	-3.33605	0.000849778	0.0065891	DOWN
ENSMUSG00000005682	8472	354	453	421	430	429	332	501	501	Pan2	4.55093	5.50184	4.87425	5.31945	5.10822	4.56223	6.23802	5.67608	422.292	-0.111819	0.124743	-0.896397	0.370041	0.582806	NOT
ENSMUSG00000005683	5779	1292	1761	2348	2402	1478	1107	2342	1403	Cs	24.3497	31.3547	39.8526	43.5617	25.8	22.3008	42.7493	23.3025	1713.67	0.464128	0.116914	3.96983	7.19e-05	0.000889527	NOT
ENSMUSG00000005686	5627	23	45	45	42	28	19	69	26	Ampd3	0.445178	0.82287	0.784417	0.78227	0.501972	0.393099	1.2935	0.4435	35.4985	0.780899	0.279221	2.79671	0.00516264	0.0273668	UP
ENSMUSG00000005687	4390	281	323	345	351	300	266	325	363	Bcas2	6.97148	7.57066	7.70843	8.37967	6.89374	7.05411	7.80934	7.93668	316.305	-0.122653	0.123906	-0.989887	0.32223	0.535155	NOT
ENSMUSG00000005696	5505	0	1	0	3	0	1	4	3	Sh2d1a	0	0.0186912	0	0.0571147	0	0.0211479	0.0766475	0.0523071	1.41178	0.748718	1.48048	0.505728	0.613048	NA	NOT
ENSMUSG00000005698	4860	407	512	492	465	415	401	507	561	Ctcf	9.12097	10.84	9.9298	10.0277	8.6141	9.6058	11.0044	11.0796	465.478	-0.126177	0.123892	-1.01844	0.308469	0.521477	NOT
ENSMUSG00000005699	1582	27	24	31	47	30	19	29	33	Pard6a	1.85883	1.56099	1.92206	3.11369	1.91299	1.39821	1.93369	2.00219	29.5586	-0.0021611	0.318085	-0.0067941	0.994579	0.997407	NOT
ENSMUSG00000005705	1013	0	2	3	0	1	1	2	4	Agrp	0	0.20315	0.290485	0	0.0995838	0.114925	0.208265	0.379007	1.54997	-0.0256469	1.29923	-0.01974	0.984251	NA	NOT
ENSMUSG00000005716	1041	0	0	0	0	0	0	0	0	Pvalb	0	0	0	0	0	0	0	0	0	NA	NA	NA	NA	NA	NA
ENSMUSG00000005718	2541	27	55	51	44	28	31	35	46	Tfap4	1.15729	2.22717	1.96869	1.81481	1.11161	1.42031	1.45298	1.7376	38.9128	0.221331	0.285634	0.774875	0.438413	0.643417	NOT
ENSMUSG00000005732	1666	111	147	191	177	93	102	220	153	Ranbp1	7.25656	9.079	11.2453	11.1348	5.63127	7.12772	13.9297	8.81482	144.611	0.396357	0.17626	2.2487	0.0245315	0.0905469	NOT
ENSMUSG00000005763	5329	4	2	4	7	8	5	10	4	Cd247	0.0817518	0.0386171	0.0736251	0.137669	0.151441	0.109232	0.197947	0.0720462	5.41892	-0.168945	0.683054	-0.247338	0.804647	0.900061	NOT
ENSMUSG00000005774	5497	80	112	132	110	135	84	123	91	Rfx5	1.58507	2.09647	2.35537	2.09725	2.47746	1.77901	2.36034	1.58896	106.77	0.00987107	0.195668	0.0504481	0.959765	0.981387	NOT
ENSMUSG00000005779	1951	1527	1558	1531	1531	1958	1362	1382	1566	Psmb4	85.2442	82.1686	76.9714	82.2436	101.24	81.2728	74.7216	77.0427	1554.03	-0.369466	0.133913	-2.75899	0.00579795	0.0300726	NOT
ENSMUSG00000005800	2425	3	30	18	6	14	8	13	12	Mmp8	0.134739	1.27293	0.728069	0.259313	0.582391	0.384064	0.565492	0.47497	12.6042	0.608244	0.573519	1.06055	0.288896	0.500557	NOT
ENSMUSG00000005802	5482	216	313	291	282	172	190	431	242	Slc30a4	4.29139	5.8749	5.20674	5.39131	3.1651	4.03497	8.29342	4.23714	259.584	0.395162	0.16596	2.38107	0.0172624	0.0697155	NOT
ENSMUSG00000005803	4084	719	663	823	716	762	754	773	918	Sqor	19.1746	16.7041	19.7663	18.3743	18.8221	21.4937	19.9659	21.5752	764.727	-0.36694	0.103434	-3.54757	0.000388809	0.00352374	NOT
ENSMUSG00000005804	3899	212	196	230	188	161	151	205	219	Bloc1s6	5.92196	5.17247	5.7861	5.05346	4.16553	4.50868	5.5462	5.39123	193.42	-0.139443	0.157386	-0.885992	0.375622	0.587651	NOT
ENSMUSG00000005813	7000	465	497	568	547	469	418	597	433	Metap1	7.23499	7.30557	7.95906	8.1898	6.75885	6.9519	8.99646	5.93727	493.171	0.0190224	0.11432	0.166396	0.867845	0.936203	NOT
ENSMUSG00000005823	2862	234	343	247	279	245	250	264	318	Gpr108	8.9049	12.3316	8.46523	10.2169	8.63564	10.1694	9.73037	10.6648	271.405	-0.154281	0.171258	-0.900865	0.36766	0.580496	NOT
ENSMUSG00000005824	1847	3	8	11	4	3	1	4	3	Tnfsf14	0.176904	0.445675	0.584167	0.226975	0.163852	0.0630316	0.228449	0.155902	4.38759	1.16485	0.775166	1.50272	0.132912	0.303496	NOT
ENSMUSG00000005836	6508	119	286	197	178	172	137	262	169	Gata6	1.99151	4.52183	2.96914	2.86653	2.66612	2.45075	4.24667	2.49251	185.441	0.355747	0.196183	1.81334	0.0697791	0.193235	NOT
ENSMUSG00000005846	2258	537	773	760	697	569	527	771	666	Rsl1d1	25.902	35.225	33.0142	32.3514	25.4206	27.1714	36.0185	28.3105	651.791	0.106845	0.104891	1.01863	0.30838	0.5214	NOT
ENSMUSG00000005864	3095	0	0	1	0	0	0	2	1	Cnga2	0	0	0.0316921	0	0	0	0.0681655	0.0310125	0.438957	0.952428	2.44739	0.38916	0.697158	NA	NOT
ENSMUSG00000005871	16116	679	778	916	768	635	591	972	791	Apc	4.58876	4.96727	5.57506	4.99446	3.97479	4.26929	6.36215	4.71103	752.577	0.0653255	0.103931	0.628549	0.529645	0.7167	NOT
ENSMUSG00000005873	3151	199	264	440	394	244	187	420	225	Reep5	6.8784	8.62087	13.6967	13.1049	7.81159	6.90905	14.0603	6.85379	286.311	0.540298	0.157966	3.42034	0.00062543	0.00516049	UP
ENSMUSG00000005881	2121	473	530	653	620	635	500	623	585	Ergic3	24.2887	25.7117	30.1984	30.6362	30.2017	27.4445	30.9844	26.4735	571.853	-0.135004	0.116523	-1.1586	0.24662	0.452714	NOT
ENSMUSG00000005882	6044	300	405	436	414	407	296	406	368	Uqcc1	5.40605	6.89487	7.07577	7.17894	6.7931	5.70154	7.08593	5.84414	373.918	0.00155677	0.126075	0.012348	0.990148	0.995107	NOT
ENSMUSG00000005883	3921	0	3	1	0	0	1	1	0	Spo11	0	0.0787263	0.0250158	0	0	0.0296912	0.0269029	0	0.728484	1.78232	1.9394	0.919004	0.358093	NA	NOT
ENSMUSG00000005886	15642	878	1043	1107	981	791	828	1161	1056	Ncoa2	6.11343	6.861	6.94172	6.57296	5.10132	6.16259	7.82952	6.4799	967.717	-0.00953897	0.108327	-0.088057	0.929831	0.966169	NOT
ENSMUSG00000005891	876	0	0	0	0	0	0	0	0	Prl4a1	0	0	0	0	0	0	0	0	0	NA	NA	NA	NA	NA	NA
ENSMUSG00000005892	1384	0	0	0	0	0	0	1	0	Trh	0	0	0	0	0	0	0.0762183	0	0.104124	0.43757	3.53381	0.123824	0.901455	NA	NOT
ENSMUSG00000005893	14935	282	291	233	268	266	281	346	275	Nr2c2	2.05649	2.00486	1.53025	1.88068	1.7967	2.19041	2.4438	1.76736	279.914	-0.246156	0.158663	-1.55144	0.120797	0.284833	NOT
ENSMUSG00000005897	4607	182	265	199	229	179	182	282	238	Nr2c1	4.30265	5.91866	4.23688	5.20957	3.91952	4.59916	6.45693	4.95856	216.445	0.0437347	0.162887	0.268497	0.788317	0.889473	NOT
ENSMUSG00000005899	9034	222	270	290	290	228	200	311	265	Smpd4	2.67643	3.07524	3.14869	3.36436	2.54597	2.57736	3.63141	2.81555	255.299	0.0644122	0.119868	0.537357	0.591021	0.763202	NOT
ENSMUSG00000005907	10356	488	445	555	470	505	371	527	526	Pex1	5.13229	4.42144	5.25669	4.75653	4.91923	4.17068	5.36802	4.87518	481.341	-0.200186	0.113835	-1.75857	0.0786507	0.210803	NOT
ENSMUSG00000005917	5422	0	0	0	0	0	0	0	0	Otx1	0	0	0	0	0	0	0	0	0	NA	NA	NA	NA	NA	NA
ENSMUSG00000005936	7821	555	724	753	740	589	555	814	683	Kctd20	7.72883	9.52515	9.44375	9.91639	7.59716	8.26144	10.9789	8.38215	666.212	0.0671715	0.0968996	0.693208	0.488179	0.682867	NOT
ENSMUSG00000005947	4581	10	12	23	8	8	5	25	8	Itgae	0.237751	0.269536	0.492469	0.183026	0.176168	0.127068	0.575672	0.16762	11.7067	0.832005	0.499562	1.66547	0.0958191	0.242344	NOT
ENSMUSG00000005949	3391	188	216	213	209	196	192	241	217	Ctns	6.03828	6.55423	6.16117	6.45956	5.83078	6.59172	7.49695	6.14227	207.453	-0.134663	0.131363	-1.02512	0.305308	0.518234	NOT
ENSMUSG00000005950	2395	3	1	2	5	2	0	2	1	P2rx5	0.136427	0.0429625	0.0819098	0.218801	0.0842408	0	0.0880886	0.0400766	1.94703	0.468682	1.13604	0.412559	0.67993	NA	NOT
ENSMUSG00000005951	2985	490	559	405	419	665	462	339	747	Shpk	17.8787	19.2692	13.3083	14.7114	22.4737	18.0187	11.9798	24.02	515.751	-0.707355	0.196202	-3.60523	0.000311876	0.00295188	DOWN
ENSMUSG00000005952	3681	1	0	0	0	0	4	0	1	Trpv1	0.0295881	0	0	0	0	0.126508	0	0.0260754	0.877656	-3.38607	2.01305	-1.68206	0.0925576	NA	NOT
ENSMUSG00000005958	6641	7	10	16	20	6	5	21	8	Ephb3	0.114802	0.154939	0.236319	0.315632	0.0911414	0.087652	0.333565	0.115625	11.0138	1.08126	0.482068	2.24297	0.0248987	0.0914217	UP
ENSMUSG00000005968	3117	48	90	125	114	48	31	157	69	Tuft1	1.67721	2.97099	3.93355	3.83312	1.55347	1.15784	5.31322	2.12476	80.5328	1.03308	0.228068	4.52969	5.91e-06	0.000108824	UP
ENSMUSG00000005973	3196	96	142	208	199	142	74	219	131	Rcn1	3.2715	4.57169	6.38364	6.52575	4.48208	2.69557	7.22824	3.93425	145.66	0.519909	0.192692	2.69813	0.00697294	0.0347451	UP
ENSMUSG00000005980	3083	19	8	15	17	12	11	14	14	Dnase1	0.671217	0.267	0.477232	0.577909	0.39265	0.415379	0.479016	0.435864	13.7348	-0.341019	0.427109	-0.798436	0.424618	0.632313	NOT
ENSMUSG00000005981	2573	1500	1619	2096	1502	1795	1509	1638	2132	Trap1	63.4943	64.7445	79.903	61.1807	70.3757	68.277	67.1536	79.5324	1712.34	-0.292196	0.125484	-2.32854	0.0198833	0.0778025	NOT
ENSMUSG00000005982	3765	681	659	669	707	708	644	649	815	Naa60	19.7	18.0101	17.429	19.6806	18.97	19.9134	18.1834	20.7773	691.629	-0.361098	0.109416	-3.30023	0.000966049	0.00728947	NOT
ENSMUSG00000005983	3227	10	12	8	7	10	6	20	11	1700037C18Rik	0.337508	0.382629	0.243166	0.227344	0.312607	0.21646	0.653772	0.327183	10.2319	0.0606506	0.502259	0.120756	0.903885	0.954612	NOT
ENSMUSG00000005983	3227	10	12	8	7	10	6	20	11	Gm41410	0.337508	0.382629	0.243166	0.227344	0.312607	0.21646	0.653772	0.327183	10.2319	0.0606506	0.502259	0.120756	0.903885	0.954612	NOT
ENSMUSG00000005986	2460	6	10	11	7	6	12	10	11	Ankrd13d	0.265643	0.418274	0.438601	0.298227	0.246045	0.567899	0.428805	0.429195	9.09567	-0.171857	0.512021	-0.335645	0.737139	0.85957	NOT
ENSMUSG00000005994	2828	0	0	0	0	0	0	0	0	Tyrp1	0	0	0	0	0	0	0	0	0	NA	NA	NA	NA	NA	NA
ENSMUSG00000006005	10496	1301	1302	2095	1411	1274	1229	1915	1292	Tpr	13.5001	12.7639	19.5782	14.0892	12.2446	13.6318	19.246	11.8151	1449.14	0.0999238	0.140543	0.710984	0.477094	0.674923	NOT
ENSMUSG00000006007	3350	0	1	1	0	0	0	1	0	Pdc	0	0.030715	0.0292797	0	0	0	0.0314884	0	0.33323	1.72852	2.60784	0.662816	0.507449	NA	NOT
ENSMUSG00000006010	4100	394	291	451	322	291	391	417	444	Odr4	10.4664	7.30306	10.7896	8.23107	7.1599	11.1024	10.7287	10.3943	374.03	-0.335055	0.17199	-1.9481	0.0514024	0.155984	NOT
ENSMUSG00000006014	4280	238	823	355	352	341	227	461	348	Prg4	6.05642	19.7857	8.13572	8.61952	8.03727	6.17458	11.3619	7.80427	383.651	0.54033	0.271198	1.99238	0.0463291	0.144698	UP
ENSMUSG00000006019	4596	117	149	156	144	139	155	157	190	Dhx34	2.77261	3.33581	3.32932	3.28372	3.05093	3.92624	3.60342	3.96799	150.194	-0.266715	0.168175	-1.58593	0.112754	0.27091	NOT
ENSMUSG00000006021	3341	105	97	116	96	112	108	90	161	Kptn	3.42291	2.98738	3.4056	3.01147	3.38174	3.76333	2.84159	4.62537	110.931	-0.557045	0.183335	-3.0384	0.00237835	0.014792	DOWN
ENSMUSG00000006024	3786	735	850	992	875	842	721	833	1061	Napa	21.1441	23.1012	25.7006	24.2221	22.4352	22.1707	23.2092	26.8987	855.886	-0.19084	0.120748	-1.58048	0.113997	0.273214	NOT
ENSMUSG00000006050	2279	615	604	642	663	722	672	626	809	Sra1	29.391	27.2702	27.6314	30.4897	31.9588	34.3281	28.9751	34.0723	670.483	-0.430008	0.111328	-3.86253	0.000112217	0.00127041	NOT
ENSMUSG00000006056	1621	0	0	0	0	0	0	0	0	Calcoco2	0	0	0	0	0	0	0	0	0	NA	NA	NA	NA	NA	NA
ENSMUSG00000006057	4912	861	1131	1476	1077	1062	847	1366	1187	Atp5g1	19.091	23.6919	29.474	22.9796	21.8104	20.0748	29.3351	23.1947	1103.14	0.0722095	0.114773	0.62915	0.529251	0.716481	NOT
ENSMUSG00000006058	2677	215	261	247	231	267	200	205	359	Snf8	8.74728	10.032	9.05024	9.04374	10.0615	8.69775	8.07794	12.8719	247.249	-0.398353	0.176424	-2.25793	0.0239501	0.0889071	NOT
ENSMUSG00000006095	1442	168	155	169	162	150	164	188	210	Tbcb	12.689	11.0602	11.4956	11.7743	10.4936	13.2405	13.7527	13.9782	170.211	-0.320657	0.14829	-2.16236	0.0305902	0.106784	NOT
ENSMUSG00000006127	5728	232	332	321	279	266	247	360	336	Inpp5k	4.41131	5.9639	5.49685	5.10488	4.68465	5.02018	6.62971	5.63032	292.296	-0.0197696	0.134412	-0.147082	0.883068	0.943669	NOT
ENSMUSG00000006134	5042	610	610	685	660	676	535	730	530	Crkl	13.1768	12.4487	13.326	13.7191	13.5251	12.3531	15.2727	10.0895	624.359	-0.0973392	0.126845	-0.767387	0.442851	0.647342	NOT
ENSMUSG00000006143	1303	0	0	0	0	0	0	0	0	Upk3bl	0	0	0	0	0	0	0	0	0	NA	NA	NA	NA	NA	NA
ENSMUSG00000006154	6036	17	10	38	43	30	16	47	41	Eps8l1	0.306749	0.170469	0.617513	0.746627	0.501384	0.3086	0.82138	0.651976	29.1221	0.136969	0.423882	0.323131	0.746596	0.865475	NOT
ENSMUSG00000006169	7033	1211	1320	1671	1406	1304	1146	1532	1341	Clint1	18.7537	19.3121	23.3049	20.9522	18.704	18.9701	22.9781	18.3014	1349.47	-0.0396677	0.0912214	-0.434851	0.663671	0.811924	NOT
ENSMUSG00000006179	4183	0	0	1	0	0	0	2	1	Prss16	0	0	0.023449	0	0	0	0.0504356	0.0229461	0.438957	0.952428	2.44739	0.38916	0.697158	NA	NOT
ENSMUSG00000006191	12799	139	82	134	102	109	112	128	147	Cdkal1	1.18283	0.659224	1.02693	0.835234	0.85911	1.01875	1.05494	1.1024	119.064	-0.475555	0.185553	-2.56291	0.01038	0.0474163	NOT
ENSMUSG00000006200	1010	0	0	0	0	0	0	0	0	Rhox6	0	0	0	0	0	0	0	0	0	NA	NA	NA	NA	NA	NA
ENSMUSG00000006204	9202	0	0	0	0	0	0	0	2	Cdcp3	0	0	0	0	0	0	0	0.0208615	0.24529	-1.6663	3.53134	-0.471862	0.637025	NA	NOT
ENSMUSG00000006205	2879	17	24	49	39	16	16	40	26	Htra1	0.643117	0.857759	1.66942	1.41973	0.56063	0.646999	1.46559	0.866819	27.1222	0.736491	0.324505	2.26958	0.0232328	0.0869941	UP
ENSMUSG00000006215	3877	77	125	99	152	135	80	118	128	Zbtb17	2.16311	3.31749	2.50467	4.10896	3.51266	2.40226	3.21056	3.16892	112.699	-0.0229846	0.225058	-0.102128	0.918655	0.960551	NOT
ENSMUSG00000006216	2639	0	0	0	0	0	0	0	0	Clcnkb	0	0	0	0	0	0	0	0	0	NA	NA	NA	NA	NA	NA
ENSMUSG00000006218	1433	86	99	204	122	116	69	113	88	Fam131c	6.53635	7.10861	13.9635	8.92273	8.16601	5.60568	8.31816	5.89432	109.034	0.299552	0.24117	1.24208	0.214206	0.414458	NOT
ENSMUSG00000006219	4457	30	51	186	133	39	23	265	34	Fblim1	0.733097	1.1774	4.09338	3.12747	0.882714	0.600773	6.27189	0.732206	86.6209	2.02355	0.366602	5.51974	3.39e-08	1.35e-06	UP
ENSMUSG00000006221	2769	0	1	3	1	0	0	2	0	Hspb7	0	0.0371597	0.10627	0.0378496	0	0	0.0761908	0	0.771196	2.94254	1.80633	1.62902	0.103309	NA	NOT
ENSMUSG00000006235	1989	16	47	28	37	31	24	32	27	Epor	0.876129	2.43141	1.38081	1.94963	1.57226	1.40476	1.69711	1.30294	29.7496	0.290233	0.325345	0.892078	0.372351	0.584806	NOT
ENSMUSG00000006241	2183	53	20	53	41	39	53	40	58	Ccdc159	2.64427	0.942696	2.38141	1.9684	1.80222	2.82649	1.93286	2.55018	45.0507	-0.696649	0.292632	-2.38063	0.017283	0.0697817	DOWN
ENSMUSG00000006262	15033	728	849	836	810	633	594	906	630	Mob1b	5.27435	5.81109	5.45472	5.64708	4.24772	4.60009	6.35737	4.02246	738.023	0.108501	0.123121	0.881252	0.378182	0.590005	NOT
ENSMUSG00000006269	4381	0	0	0	0	0	0	0	0	Atp6v1b1	0	0	0	0	0	0	0	0	0	NA	NA	NA	NA	NA	NA
ENSMUSG00000006270	1117	0	0	0	0	0	0	0	0	Vax1	0	0	0	0	0	0	0	0	0	NA	NA	NA	NA	NA	NA
ENSMUSG00000006273	5305	646	785	1066	831	702	639	999	842	Atp6v1b2	13.2626	15.2258	19.7099	16.4172	13.349	14.023	19.8644	15.2343	797.595	0.0961597	0.109309	0.879708	0.379017	0.591065	NOT
ENSMUSG00000006276	6739	223	215	292	200	231	214	300	252	Eps15l1	3.60406	3.28276	4.2501	3.11042	3.45792	3.69695	4.69592	3.58924	238.206	-0.161001	0.144392	-1.11503	0.264838	0.473623	NOT
ENSMUSG00000006281	9568	302	225	416	288	277	244	396	290	Tep1	3.43771	2.41967	4.26465	3.15468	2.9205	2.96889	4.36585	2.9092	299.729	-0.0468194	0.172752	-0.271021	0.786375	0.888407	NOT
ENSMUSG00000006288	4065	137	180	156	162	156	128	195	134	Ttc5	3.67065	4.55625	3.76423	4.17675	3.87135	3.66585	5.06022	3.16403	154.104	0.0370231	0.158118	0.234148	0.81487	0.905787	NOT
ENSMUSG00000006289	4933	92	140	128	165	124	116	162	144	Osgep	2.03123	2.9202	2.54513	3.50556	2.53576	2.73761	3.46417	2.80187	131.923	0.0466414	0.177857	0.26224	0.793136	0.892993	NOT
ENSMUSG00000006299	3458	831	1072	1013	1151	1201	798	900	1227	Aamp	26.1733	31.8981	28.734	34.8847	35.0361	26.866	27.4545	34.0578	1017.59	-0.230417	0.156717	-1.47027	0.141488	0.315652	NOT
ENSMUSG00000006301	12659	653	871	1062	1314	718	607	905	787	Tmbim1	5.61819	7.07969	8.2288	10.8788	5.72167	5.58232	7.54127	5.96722	846.098	0.314897	0.156492	2.01222	0.0441963	0.139543	NOT
ENSMUSG00000006304	2033	1143	1148	1537	1354	1103	1076	1644	1305	Arpc2	61.2339	58.1032	74.1563	69.8016	54.7314	61.6169	85.3021	61.6127	1268.43	0.00699222	0.107474	0.0650596	0.948127	0.975274	NOT
ENSMUSG00000006307	9596	455	889	578	576	608	475	649	684	Kmt2b	5.16421	9.5325	5.90812	6.29095	6.39163	5.76273	7.13427	6.84168	606.925	0.0177153	0.184695	0.0959162	0.923587	0.962589	NOT
ENSMUSG00000006310	2357	30	34	16	25	36	32	25	38	Zbtb32	1.38626	1.48428	0.665843	1.11164	1.54078	1.58058	1.11886	1.54747	29.9634	-0.713292	0.314416	-2.26863	0.0232911	0.0871128	DOWN
ENSMUSG00000006311	1048	0	0	0	0	0	0	0	0	Etv2	0	0	0	0	0	0	0	0	0	NA	NA	NA	NA	NA	NA
ENSMUSG00000006313	1421	0	6	4	3	3	2	5	0	Upk1a	0	0.434463	0.276107	0.221264	0.212973	0.163856	0.371169	0	2.7337	1.55546	1.04265	1.49183	0.135743	NA	NOT
ENSMUSG00000006315	1112	639	741	740	782	764	576	688	649	Tmem147	62.5863	68.566	65.2737	73.7032	69.3085	60.3036	65.2648	56.0192	692.739	-0.109014	0.129027	-0.844886	0.398174	0.608966	NOT
ENSMUSG00000006333	2522	2022	3494	2441	3577	3219	1980	2805	2717	Rps9	87.3211	142.552	94.9367	148.648	128.758	91.3998	117.323	103.405	2748.07	0.0539095	0.187295	0.287832	0.773475	0.880442	NOT
ENSMUSG00000006335	1201	43	96	62	105	92	44	69	65	Tfpt	3.8995	8.22477	5.06361	9.16285	7.72757	4.26516	6.0604	5.19478	70.8124	0.194006	0.289581	0.669954	0.502887	0.69595	NOT
ENSMUSG00000006342	3435	56	99	165	88	65	42	137	46	Susd2	1.7756	2.96554	4.7116	2.68497	1.90891	1.42347	4.20716	1.28537	83.0433	0.931437	0.237342	3.92445	8.69e-05	0.00102976	UP
ENSMUSG00000006344	5922	36	70	73	56	43	45	81	48	Ggt5	0.66209	1.21626	1.20911	0.991069	0.732484	0.884646	1.44282	0.777982	54.9542	0.416833	0.223654	1.86374	0.0623587	0.178742	NOT
ENSMUSG00000006345	3411	0	3	5	6	2	1	12	7	Ggt1	0	0.0904972	0.14378	0.184355	0.0591489	0.0341306	0.371103	0.196976	4.1343	1.127	0.89377	1.26095	0.207326	0.406336	NOT
ENSMUSG00000006356	2099	935	1596	1461	1326	1050	858	1627	1258	Crip2	48.5157	78.2377	68.2731	66.2087	50.4632	47.5883	81.7655	57.5261	1233.63	0.279636	0.114409	2.44417	0.0145184	0.0610622	NOT
ENSMUSG00000006360	2280	11	41	58	84	34	13	75	30	Crip1	0.525461	1.85031	2.4952	3.86126	1.50433	0.663795	3.46994	1.26294	40.6416	1.29204	0.354464	3.64505	0.000267344	0.00261708	UP
ENSMUSG00000006362	8373	64	155	226	211	142	71	172	104	Cbfa2t3	0.832495	1.90479	2.64752	2.6411	1.71082	0.987194	2.16692	1.1922	137.371	0.736856	0.231945	3.17686	0.00148881	0.0101689	UP
ENSMUSG00000006369	4368	18	34	76	49	16	17	68	18	Fbln1	0.448821	0.800925	1.70664	1.1757	0.369518	0.453097	1.64218	0.395537	34.6573	1.41798	0.317594	4.46476	8.02e-06	0.000140172	UP
ENSMUSG00000006373	1857	7172	6943	7761	8227	6992	5422	6513	6808	Pgrmc1	420.641	384.708	409.937	464.316	379.829	339.917	369.968	351.888	6932.76	-0.117245	0.132821	-0.88273	0.377382	0.58912	NOT
ENSMUSG00000006378	2384	62	83	89	81	90	71	65	110	Gcat	2.83249	3.58234	3.66181	3.56093	3.80833	3.46719	2.87609	4.42877	81.0105	-0.330913	0.215815	-1.53332	0.125197	0.29186	NOT
ENSMUSG00000006386	4712	264	327	404	332	264	243	382	262	Tek	6.10213	7.14065	8.40984	7.38443	5.65193	6.0038	8.55172	5.33695	303.792	0.196186	0.121649	1.61273	0.106804	0.260776	NOT
ENSMUSG00000006389	3155	1	1	0	0	3	0	2	0	Mpl	0.034521	0.0326134	0	0	0.0959224	0	0.0668692	0	0.866716	-0.7036	1.86731	-0.376799	0.706323	NA	NOT
ENSMUSG00000006390	2726	265	481	529	597	361	316	561	342	Elovl1	10.5877	18.1558	19.0345	22.9526	13.3592	13.4954	21.7086	12.042	419.683	0.475105	0.135135	3.51577	0.000438483	0.00388006	NOT
ENSMUSG00000006392	3001	317	509	373	443	380	284	378	406	Med8	11.5047	17.4521	12.1914	15.4711	12.7737	11.0174	13.2868	12.9854	381.883	0.0353632	0.16696	0.211807	0.832258	0.915875	NOT
ENSMUSG00000006395	2209	214	304	209	266	364	238	228	347	Hyi	10.5512	14.1603	9.2803	12.6203	16.6228	12.5431	10.8877	15.0775	271.844	-0.462841	0.200736	-2.30572	0.0211263	0.0811037	NOT
ENSMUSG00000006398	1868	11	311	194	227	55	15	279	24	Cdc20	0.641355	17.1309	10.1868	12.736	2.97019	0.934845	15.7552	1.23319	128.43	3.01608	0.351967	8.56921	1.04e-17	4.5e-15	UP
ENSMUSG00000006403	4810	21	25	58	56	23	15	55	9	Adamts4	0.475507	0.534799	1.18275	1.22019	0.482371	0.363054	1.20618	0.179595	31.0319	1.20792	0.37271	3.24091	0.0011915	0.00855421	UP
ENSMUSG00000006411	3746	5	6	11	9	8	4	18	9	Nectin4	0.145373	0.164808	0.288029	0.251802	0.215437	0.124313	0.506874	0.230607	8.33034	0.47402	0.548296	0.864533	0.387295	0.598793	NOT
ENSMUSG00000006412	1937	200	279	172	303	270	156	180	246	Pfdn2	11.2456	14.8207	8.70984	16.3945	14.0615	9.37606	9.80253	12.19	224.857	-0.148381	0.239488	-0.619577	0.535536	0.721016	NOT
ENSMUSG00000006418	3356	584	810	843	790	791	647	697	873	Rnf114	18.9528	24.8347	24.6387	24.6712	23.7768	22.4444	21.9082	24.9683	748.175	-0.150634	0.137301	-1.09711	0.272594	0.483138	NOT
ENSMUSG00000006423	7424	350	291	376	343	320	318	380	386	C330007P06Rik	5.13468	4.03321	4.96777	4.84217	4.34821	4.98671	5.39934	4.99052	343.807	-0.269769	0.121039	-2.22877	0.025829	0.0941813	NOT
ENSMUSG00000006435	7284	2	8	5	12	6	5	18	5	Neurl1a	0.0299049	0.11301	0.0673305	0.172662	0.0830959	0.0799144	0.260674	0.0658866	7.24938	0.968751	0.626905	1.54529	0.122275	0.287355	NOT
ENSMUSG00000006442	1599	163	433	337	454	280	171	361	238	Srm	11.1025	27.8635	20.6725	29.7572	17.6648	12.4501	23.8152	14.2865	295.317	0.63706	0.193836	3.2866	0.00101404	0.00756695	UP
ENSMUSG00000006445	4674	748	617	980	1038	1036	746	946	671	Epha2	17.4299	13.5829	20.566	23.2752	22.3599	18.5813	21.35	13.7794	840.737	-0.130755	0.18631	-0.701813	0.482796	0.679227	NOT
ENSMUSG00000006456	3910	159	244	189	196	110	139	229	183	Rbm14	4.42898	6.42109	4.74129	5.25368	2.83801	4.13869	6.17809	4.49233	177.727	0.260433	0.189424	1.37486	0.169174	0.355366	NOT
ENSMUSG00000006457	2901	1	1	2	1	1	0	1	1	Actn3	0.0375435	0.0354689	0.0676229	0.0361274	0.0347737	0	0.036362	0.0330864	0.955683	0.470657	1.47294	0.319536	0.74932	NA	NOT
ENSMUSG00000006462	5964	7	11	10	9	4	6	4	11	A530013C23Rik	0.127833	0.18978	0.164465	0.158157	0.0676582	0.117122	0.0707486	0.177032	7.67925	0.0220193	0.57942	0.0380023	0.969686	0.985343	NOT
ENSMUSG00000006463	2916	42	61	50	45	52	36	57	47	Zdhhc24	1.56872	2.15247	1.68188	1.61737	1.79893	1.43728	2.06197	1.54706	48.1236	-0.00884315	0.236361	-0.0374137	0.970155	0.985531	NOT
ENSMUSG00000006464	7674	25	45	35	40	33	29	49	52	Bbs1	0.354814	0.603373	0.447361	0.546289	0.433801	0.439948	0.67355	0.650397	37.7636	0.0156919	0.280208	0.0560009	0.955341	0.979224	NOT
ENSMUSG00000006469	2358	0	0	0	0	0	0	1	0	Slc34a3	0	0	0	0	0	0	0.0447354	0	0.104124	0.43757	3.53381	0.123824	0.901455	NA	NOT
ENSMUSG00000006471	5835	61	69	76	71	75	64	108	71	Ndor1	1.1386	1.21676	1.27757	1.27527	1.29664	1.27692	1.95244	1.16792	73.2381	-0.0317076	0.203424	-0.15587	0.876136	0.939924	NOT
ENSMUSG00000006476	4896	1122	1085	1167	1021	1591	979	891	1446	Nsmf	24.9594	22.8026	23.3798	21.8559	32.7814	23.2791	19.1969	28.3481	1166.93	-0.567012	0.152155	-3.72653	0.000194134	0.00201138	DOWN
ENSMUSG00000006488	1621	0	0	0	0	0	0	0	0	Prl7a1	0	0	0	0	0	0	0	0	0	NA	NA	NA	NA	NA	NA
ENSMUSG00000006490	942	0	0	0	0	0	0	0	0	Prl8a9	0	0	0	0	0	0	0	0	0	NA	NA	NA	NA	NA	NA
ENSMUSG00000006494	7779	864	671	518	471	802	863	496	1151	Pdk1	12.0969	8.87553	6.53157	6.34573	10.4004	12.9155	6.72594	14.202	746.232	-1.03986	0.167013	-6.22621	4.78e-10	3.43e-08	DOWN
ENSMUSG00000006498	4740	909	1049	1229	1212	861	884	1531	1097	Ptbp1	20.8866	22.7716	25.4323	26.7984	18.3241	21.712	34.0716	22.2139	1074.58	0.132567	0.117426	1.12894	0.258924	0.46711	NOT
ENSMUSG00000006517	1859	9	45	28	51	32	15	55	16	Mvd	0.527286	2.49074	1.47737	2.87525	1.73648	0.939371	3.12089	0.826109	29.9581	1.04491	0.383414	2.72527	0.00642496	0.0325144	UP
ENSMUSG00000006519	1039	104	270	239	257	182	89	361	125	Cyba	10.9019	26.7389	22.5628	25.924	17.6707	9.9724	36.6511	11.5476	194.084	0.897415	0.206116	4.35394	1.34e-05	0.0002182	UP
ENSMUSG00000006522	3638	15259	17136	10966	8385	14206	16229	8485	22599	Itih3	456.821	484.666	295.663	241.56	393.919	519.343	246.028	596.243	14429.9	-0.858417	0.238999	-3.59172	0.000328498	0.00308323	DOWN
ENSMUSG00000006526	4362	207	220	190	181	211	172	208	210	Stimate	5.16854	5.18958	4.27247	4.34888	4.87972	4.59058	5.03006	4.62094	199.477	-0.280134	0.145504	-1.92526	0.0541966	0.161498	NOT
ENSMUSG00000006527	8637	570	601	596	513	481	460	591	511	Sfmbt1	7.18778	7.1599	6.76854	6.22499	5.61798	6.20041	7.21805	5.67878	536.683	-0.0990961	0.130484	-0.759451	0.447583	0.65149	NOT
ENSMUSG00000006529	3293	8794	5348	5199	3897	8849	7999	2766	12005	Itih1	290.856	167.107	154.86	124.029	271.082	282.793	88.6045	349.919	7070.52	-1.38691	0.209271	-6.62733	3.42e-11	3.53e-09	DOWN
ENSMUSG00000006538	3048	10	13	15	29	10	5	40	5	Ihh	0.357329	0.438858	0.482712	0.997166	0.330966	0.190977	1.38433	0.157453	14.8925	1.39355	0.503434	2.76809	0.00563862	0.0294	UP
ENSMUSG00000006542	3682	5	3	3	1	6	7	3	1	Prkag3	0.1479	0.0838365	0.0799188	0.0284643	0.164386	0.22133	0.0859474	0.0260683	3.81409	-1.24848	0.850807	-1.4674	0.142266	0.316541	NOT
ENSMUSG00000006546	1193	0	0	0	0	0	0	0	0	Cryba2	0	0	0	0	0	0	0	0	0	NA	NA	NA	NA	NA	NA
ENSMUSG00000006567	6505	498	416	561	385	572	462	492	585	Atp7b	8.33806	6.58024	8.45916	6.20294	8.87047	8.26837	7.97835	8.63188	496.251	-0.475856	0.12277	-3.87601	0.000106185	0.00120944	NOT
ENSMUSG00000006570	305	0	0	0	0	0	0	0	0	Defb2	0	0	0	0	0	0	0	0	0	NA	NA	NA	NA	NA	NA
ENSMUSG00000006574	4891	11	4	10	3	53	12	1	19	Slc4a1	0.24495	0.0841507	0.200546	0.0642847	1.09314	0.285633	0.0215674	0.372866	14.736	-2.65631	0.664484	-3.99756	6.4e-05	0.000806912	DOWN
ENSMUSG00000006575	2941	161	277	226	258	232	178	208	218	Rundc3a	5.9623	9.69126	7.53746	9.19409	7.95776	7.04612	7.46042	7.11473	217.449	0.0306733	0.176827	0.173465	0.862286	0.932577	NOT
ENSMUSG00000006576	8599	5	14	27	15	6	12	40	7	Slc4a3	0.0633294	0.167523	0.307983	0.182822	0.0703884	0.162465	0.49069	0.0781352	14.7414	1.35293	0.495163	2.7323	0.00628947	0.0319824	UP
ENSMUSG00000006585	3140	47	82	73	84	67	62	83	66	Cdt1	1.63024	2.68707	2.28037	2.80372	2.1525	2.29873	2.78833	2.01749	69.4488	0.133694	0.207498	0.644312	0.519373	0.708763	NOT
ENSMUSG00000006586	7959	3	4	11	9	4	4	12	4	Runx1t1	0.0410531	0.0517127	0.135564	0.118514	0.050699	0.0585095	0.159044	0.048239	6.03883	0.964765	0.63773	1.51281	0.130328	0.2998	NOT
ENSMUSG00000006587	1628	0	11	3	7	11	0	9	2	Snai3	0	0.695238	0.18075	0.450638	0.681611	0	0.583154	0.117916	5.11073	0.986194	0.977861	1.00852	0.313204	0.525551	NOT
ENSMUSG00000006589	1615	551	819	797	811	806	619	885	625	Aprt	37.1588	52.1803	48.4058	52.6299	50.3455	44.6214	57.8051	37.1453	728.915	0.0667368	0.135475	0.492614	0.622285	0.785315	NOT
ENSMUSG00000006599	2984	280	340	376	454	311	278	414	379	Gtf2h1	10.2198	11.724	12.3595	15.9456	10.5138	10.846	14.6351	12.1909	348.211	0.0689598	0.136975	0.50345	0.614648	0.779853	NOT
ENSMUSG00000006611	3572	734	807	900	766	701	608	857	898	Hfe	22.3804	23.2465	24.714	22.4751	19.7972	19.8161	25.3084	24.1302	774.396	-0.0965885	0.108365	-0.891329	0.372753	0.585219	NOT
ENSMUSG00000006638	1352	5	6	4	13	7	8	6	4	Abhd1	0.402788	0.456636	0.290198	1.00775	0.522299	0.688872	0.468134	0.283975	6.66302	-0.0113858	0.630701	-0.0180526	0.985597	0.992582	NOT
ENSMUSG00000006641	3991	102	177	146	108	111	56	118	110	Slc5a6	2.78357	4.56338	3.58825	2.83613	2.80569	1.63355	3.11886	2.6455	113.406	0.275915	0.238574	1.15652	0.247469	0.453827	NOT
ENSMUSG00000006642	4116	1	0	5	4	1	1	9	3	Tcf23	0.0264611	0	0.119153	0.101852	0.0245088	0.0282846	0.230655	0.0699589	2.74343	1.28555	1.06551	1.20651	0.227623	NA	NOT
ENSMUSG00000006649	6620	0	0	0	0	0	0	0	0	Nphs1	0	0	0	0	0	0	0	0	0	NA	NA	NA	NA	NA	NA
ENSMUSG00000006651	3017	9	4	19	17	6	5	24	4	Aplp1	0.3249	0.136421	0.617717	0.590552	0.20062	0.192939	0.839134	0.127257	10.3651	1.0973	0.57939	1.89388	0.0582407	0.170209	NOT
ENSMUSG00000006673	7918	527	611	750	669	520	440	881	673	Qrich1	7.249	7.94001	9.29089	8.85513	6.625	6.46938	11.737	8.15824	618.915	0.149345	0.122815	1.21602	0.223978	0.426104	NOT
ENSMUSG00000006675	3890	1	2	12	7	2	1	11	2	P4htm	0.0279984	0.0529025	0.302582	0.188596	0.0518655	0.0299279	0.29829	0.0493489	4.3124	2.11714	0.881633	2.40138	0.0163333	0.0669415	UP
ENSMUSG00000006676	7048	960	1041	1247	978	1184	907	1071	1205	Usp19	14.835	15.1978	17.3545	14.5431	16.9467	14.9819	16.0295	16.4104	1066.68	-0.249587	0.108006	-2.31086	0.0208406	0.0802996	NOT
ENSMUSG00000006678	8813	26	42	58	65	27	24	52	24	Pola1	0.321316	0.490367	0.645529	0.77299	0.309057	0.317039	0.622407	0.261387	38.2934	0.818956	0.271384	3.0177	0.00254701	0.0156014	UP
ENSMUSG00000006699	2966	1708	1922	2679	2282	1692	1567	2840	1528	Cdc42	62.7191	66.6773	88.5958	80.636	57.5476	61.5068	101.005	49.448	1979.84	0.282967	0.127641	2.2169	0.0266302	0.0962489	NOT
ENSMUSG00000006705	6933	220	200	275	229	246	221	230	253	Pknox1	3.45609	2.96828	3.89066	3.46177	3.57941	3.71105	3.49947	3.50265	233.421	-0.293682	0.134505	-2.18343	0.0290041	0.102628	NOT
ENSMUSG00000006711	5276	45	36	48	27	80	27	49	43	D130043K22Rik	0.928947	0.702091	0.892376	0.536344	1.52962	0.595778	0.979685	0.782277	44.175	-0.564561	0.321185	-1.75774	0.0787916	0.210991	NOT
ENSMUSG00000006715	1465	64	128	79	117	56	46	139	71	Gmnn	4.75801	8.99017	5.28933	8.37014	3.8561	3.65549	10.0086	4.65176	84.5142	0.694322	0.23124	3.0026	0.00267686	0.0162316	UP
ENSMUSG00000006717	744	367	237	528	437	378	272	528	376	Acot13	53.725	32.7771	69.6101	61.5592	51.2527	42.5619	74.8611	48.5078	381.958	0.0186209	0.203644	0.0914385	0.927144	0.964507	NOT
ENSMUSG00000006720	3513	2	5	3	2	0	1	9	2	Zfp184	0.0620062	0.146449	0.0837635	0.0596673	0	0.0331396	0.270246	0.0546448	2.78507	1.62875	1.02903	1.5828	0.113468	NA	NOT
ENSMUSG00000006724	2574	0	0	2	2	1	0	3	2	Cyp27b1	0	0	0.0762137	0.081434	0.0391913	0	0.122944	0.0745793	1.14092	0.969048	1.53445	0.631528	0.527696	NA	NOT
ENSMUSG00000006728	3249	326	561	536	532	498	357	552	526	Cdk4	10.9283	17.7668	16.1818	17.1611	15.4624	12.7922	17.9219	15.5394	477.106	0.0873354	0.143206	0.609858	0.541956	0.72506	NOT
ENSMUSG00000006731	3454	756	1001	797	744	1112	772	677	983	B4galnt1	23.8387	29.82	22.6333	22.5754	32.4773	26.0208	20.6758	27.3167	858.219	-0.432691	0.174387	-2.48121	0.0130937	0.0565371	NOT
ENSMUSG00000006732	2907	100	165	115	107	142	118	133	144	Mettl1	3.74661	5.84029	3.88029	3.85765	4.92767	4.72566	4.82616	4.7546	127.512	-0.225533	0.2002	-1.12654	0.259937	0.468337	NOT
ENSMUSG00000006736	2193	2772	2056	3372	2582	3069	2711	2199	2762	Tspan31	137.669	96.4673	150.821	123.396	141.175	143.918	105.775	120.888	2698.87	-0.437856	0.15682	-2.79209	0.00523696	0.0276825	NOT
ENSMUSG00000006740	7981	764	919	1072	894	770	673	1131	806	Kif5b	10.426	11.8482	13.175	11.7399	9.73266	9.81709	14.9486	9.69337	862.167	0.127989	0.0956353	1.3383	0.180798	0.371083	NOT
ENSMUSG00000006763	8080	51	60	67	65	54	59	71	85	Saal1	0.687451	0.764074	0.813345	0.843114	0.674187	0.850092	0.92692	1.00973	63.3795	-0.197711	0.21514	-0.918987	0.358102	0.57101	NOT
ENSMUSG00000006764	2879	0	0	0	0	0	0	0	0	Tph2	0	0	0	0	0	0	0	0	0	NA	NA	NA	NA	NA	NA
ENSMUSG00000006777	1565	58	32	158	180	20	38	218	87	Krt23	4.03642	2.10393	9.90272	12.0543	1.28918	2.8268	14.6939	5.33583	92.2148	1.24334	0.634628	1.95916	0.0500938	0.152985	NOT
ENSMUSG00000006782	3639	94	109	164	124	99	120	153	88	Cnp	2.81338	3.08205	4.42052	3.57128	2.74442	3.83906	4.43511	2.32112	117.034	0.15149	0.20093	0.753948	0.45088	0.654463	NOT
ENSMUSG00000006784	6147	3	2	2	3	1	3	6	6	Ttc25	0.0531546	0.0334782	0.0319138	0.0511496	0.016411	0.0568177	0.102963	0.0936882	3.19017	-0.284959	0.864778	-0.329517	0.741765	0.86254	NOT
ENSMUSG00000006800	5871	404	746	856	934	564	418	824	576	Sulf2	7.49467	13.0744	14.3012	16.6732	9.69092	8.28876	14.8051	9.41689	644.991	0.505403	0.132442	3.81604	0.000135608	0.00149702	UP
ENSMUSG00000006818	10008	1857	1947	1975	1838	1823	1511	1968	2065	Sod2	20.2091	20.0177	19.3567	19.2479	18.3754	17.5769	20.7431	19.8048	1859.47	-0.184864	0.0956194	-1.93333	0.0531954	0.159614	NOT
ENSMUSG00000006850	3363	56	98	96	147	78	72	108	69	Tmco6	1.81361	2.99844	2.79999	4.58115	2.33973	2.49248	3.3876	1.96933	88.5194	0.428769	0.224302	1.91157	0.0559314	0.165265	NOT
ENSMUSG00000006906	10426	175	162	197	177	138	176	191	204	Stambp	1.82811	1.5988	1.85336	1.77926	1.33524	1.96526	1.93246	1.87806	176.68	-0.21803	0.160877	-1.35527	0.175333	0.36379	NOT
ENSMUSG00000006920	7440	324	351	432	377	294	327	409	359	Ezh1	4.74302	4.85433	5.69538	5.31071	3.98632	5.11682	5.7989	4.63147	355.085	-0.0211617	0.124955	-0.169354	0.865518	0.93442	NOT
ENSMUSG00000006930	3766	31	39	56	51	29	23	82	31	Hap1	0.896529	1.06556	1.45854	1.4193	0.776812	0.711005	2.29683	0.790093	40.8702	0.706616	0.276175	2.55858	0.01051	0.0478508	UP
ENSMUSG00000006931	2178	18	56	42	50	38	11	69	28	P3h4	0.900114	2.64561	1.89149	2.406	1.76005	0.587977	3.34185	1.23395	37.0727	0.930632	0.330938	2.8121	0.00492186	0.0263139	UP
ENSMUSG00000006932	5192	1849	1855	2536	2124	1942	1725	2667	2070	Ctnnb1	38.7869	36.7625	47.91	42.875	37.7322	38.6794	54.1856	38.2677	2063.33	-0.0145715	0.101991	-0.14287	0.886393	0.94547	NOT
ENSMUSG00000006941	1125	137	172	134	163	134	134	180	176	Eif1b	13.2633	15.7315	11.6833	15.1852	12.0157	13.8668	16.8778	15.0161	152.487	-0.115883	0.167011	-0.693865	0.487767	0.682744	NOT
ENSMUSG00000006948	1249	0	0	0	0	0	0	0	0	Klk4	0	0	0	0	0	0	0	0	0	NA	NA	NA	NA	NA	NA
ENSMUSG00000006958	6258	80	78	52	41	96	84	45	111	Chrd	1.39231	1.28249	0.815041	0.686645	1.54751	1.56268	0.758529	1.70249	75.0819	-1.04573	0.246751	-4.23799	2.26e-05	0.000335258	DOWN
ENSMUSG00000006998	4038	2287	1939	2423	2284	2666	1984	1956	2264	Psmd2	61.6855	49.4091	58.8571	59.2808	66.6027	57.2006	51.0973	53.8155	2227.24	-0.376741	0.127622	-2.952	0.00315728	0.0185185	NOT
ENSMUSG00000007021	2071	3	3	1	5	1	2	5	5	Syngr3	0.15777	0.149052	0.0473622	0.253031	0.04871	0.112428	0.254674	0.231732	3.05864	0.0834181	0.890902	0.0936334	0.9254	0.963519	NOT
ENSMUSG00000007029	5608	374	512	564	453	606	399	583	458	Vars	7.26351	9.39415	9.86467	8.46593	10.9009	8.28305	10.9662	7.83889	487.278	-0.0794023	0.150685	-0.526941	0.598234	0.768845	NOT
ENSMUSG00000007030	4313	3	5	10	4	3	0	8	2	Vwa7	0.0757574	0.119285	0.227422	0.0971997	0.0701681	0	0.195662	0.044509	4.05708	1.47131	0.827317	1.77841	0.0753371	0.204395	NOT
ENSMUSG00000007033	2472	6	6	12	17	3	7	10	8	Hspa1l	0.264354	0.249746	0.476151	0.72075	0.122425	0.329666	0.426724	0.310626	8.36783	0.622228	0.566375	1.09862	0.271936	0.482376	NOT
ENSMUSG00000007034	3112	6	8	9	4	3	1	11	4	Slc44a4	0.209988	0.264512	0.283671	0.134711	0.0972478	0.0374098	0.372862	0.123372	5.44997	0.906995	0.691326	1.31196	0.189533	0.383377	NOT
ENSMUSG00000007035	5526	12	14	19	10	13	7	14	16	Msh5	0.236512	0.260683	0.337252	0.189659	0.237318	0.147473	0.267247	0.277911	12.8372	-0.0244345	0.430218	-0.0567955	0.954708	0.979043	NOT
ENSMUSG00000007036	3220	345	414	470	443	480	364	386	551	Abhd16a	11.6693	13.2294	14.3171	14.4189	15.0378	13.1605	12.6452	16.4245	428.891	-0.288196	0.147138	-1.95867	0.0501515	0.15307	NOT
ENSMUSG00000007038	3733	501	459	596	563	588	449	557	623	Neu1	14.6172	12.6517	15.6603	15.8065	15.8898	14.0028	15.7396	16.0187	538.162	-0.26794	0.113364	-2.36354	0.0181015	0.0723067	NOT
ENSMUSG00000007039	1593	20	49	78	81	35	30	89	32	Ddah2	1.36741	3.16502	4.80275	5.3291	2.21641	2.19246	5.89345	1.92811	49.1377	1.05594	0.266265	3.96575	7.32e-05	0.000902235	UP
ENSMUSG00000007041	1799	186	310	381	373	235	172	425	193	Clic1	11.2607	17.7307	20.7733	21.7301	13.1776	11.1307	24.9203	10.2973	274.294	0.636003	0.13753	4.62446	3.76e-06	7.37e-05	UP
ENSMUSG00000007050	3152	110	143	214	190	122	98	199	125	Lsm2	3.80093	4.66816	6.65946	6.31759	3.90456	3.61964	6.65981	3.80645	145.586	0.429076	0.158801	2.70198	0.00689286	0.0344377	NOT
ENSMUSG00000007080	11160	15	47	42	31	14	18	71	24	Pole	0.14639	0.43334	0.369145	0.291127	0.12655	0.187773	0.671103	0.206416	30.9489	1.13807	0.334797	3.39927	0.000675663	0.00549163	UP
ENSMUSG00000007097	7038	18	19	49	34	15	9	47	18	Atp1a2	0.278552	0.277779	0.682902	0.506307	0.215001	0.148874	0.70444	0.245482	24.6146	1.02124	0.369802	2.76157	0.00575235	0.0298821	UP
ENSMUSG00000007107	3667	2	3	3	3	6	1	5	6	Atp1a4	0.0594021	0.0841794	0.0802457	0.0857422	0.165059	0.0317479	0.143832	0.15705	3.52497	-0.353291	0.815169	-0.433397	0.664726	0.812685	NOT
ENSMUSG00000007122	1951	8	3	11	9	12	2	24	3	Casq1	0.446597	0.158219	0.553028	0.48347	0.620472	0.119343	1.29763	0.147591	8.50354	0.596688	0.692418	0.861745	0.388828	0.600501	NOT
ENSMUSG00000007207	2666	4	9	16	13	3	3	19	9	Stx1a	0.163412	0.347358	0.588669	0.511055	0.113517	0.131005	0.751776	0.324026	8.85477	1.30787	0.557885	2.34434	0.019061	0.0753369	UP
ENSMUSG00000007209	1411	0	0	0	0	0	0	0	0	Ceacam9	0	0	0	0	0	0	0	0	0	NA	NA	NA	NA	NA	NA
ENSMUSG00000007216	4244	48	32	41	52	43	45	45	42	Zfp775	1.23182	0.775836	0.947589	1.28414	1.02209	1.23442	1.11849	0.949885	43.6494	-0.356058	0.255691	-1.39253	0.163761	0.347061	NOT
ENSMUSG00000007279	4153	0	0	1	2	0	0	0	0	Scube2	0	0	0.0236184	0.0504722	0	0	0	0	0.343492	1.76488	2.98587	0.591076	0.554469	NA	NOT
ENSMUSG00000007338	1876	208	170	219	241	224	173	234	207	Mrpl49	12.0757	9.3242	11.4505	13.4638	12.0452	10.7359	13.1576	10.5909	207.969	-0.194166	0.149725	-1.29682	0.194695	0.389651	NOT
ENSMUSG00000007379	6858	24	25	42	42	22	20	42	12	Dennd2c	0.381151	0.375092	0.600708	0.641854	0.323611	0.339514	0.646022	0.16795	27.7304	0.65084	0.336474	1.9343	0.0530764	0.159371	NOT
ENSMUSG00000007411	9700	546	718	770	784	655	504	754	617	Mark3	6.13061	7.61637	7.78629	8.47088	6.81189	6.04901	8.19964	6.10535	657.76	0.10497	0.107496	0.976495	0.328819	0.541989	NOT
ENSMUSG00000007415	4168	535	614	521	680	617	427	603	504	Gatad1	13.9801	15.1578	12.2609	17.0988	14.9333	11.9268	15.2611	11.6065	558.075	-0.0584342	0.152981	-0.381971	0.702483	0.837761	NOT
ENSMUSG00000007440	5359	0	0	0	0	0	0	0	0	Pcdha10	0	0	0	0	0	0	0	0	0	NA	NA	NA	NA	NA	NA
ENSMUSG00000007457	1603	0	0	0	0	0	0	0	0	NA	0	0	0	0	0	0	0	0	0	NA	NA	NA	NA	NA	NA
ENSMUSG00000007458	4170	1042	1427	1490	1485	1085	935	1614	1253	M6pr	27.2154	35.2114	35.0479	37.3228	26.2477	26.1036	40.8284	28.8411	1264.69	0.201801	0.0872798	2.31211	0.0207715	0.0801106	NOT
ENSMUSG00000007476	4308	116	153	154	170	119	113	174	144	Lrrc8a	2.93268	3.65436	3.50636	4.13578	2.78657	3.05371	4.26058	3.20836	140.442	0.125166	0.1511	0.828369	0.407462	0.616569	NOT
ENSMUSG00000007480	3904	0	0	0	1	0	0	0	0	Mc5r	0	0	0	0.0268457	0	0	0	0	0.117714	0.43757	3.53381	0.123824	0.901455	NA	NOT
ENSMUSG00000007564	3411	881	1525	1329	1382	978	820	1464	1007	Ppp2r1a	28.1305	46.0027	38.2168	42.463	28.9238	27.9871	45.2746	28.3364	1146.62	0.353717	0.109806	3.22129	0.00127615	0.00900088	NOT
ENSMUSG00000007570	3192	78	146	79	113	115	99	87	94	Fance	2.66143	4.70636	2.42759	3.71022	3.6344	3.61075	2.87509	2.82658	101.509	-0.126956	0.254434	-0.498973	0.617798	0.782143	NOT
ENSMUSG00000007589	4938	109	165	162	140	120	95	157	129	Tinf2	2.40413	3.43818	3.21792	2.9714	2.45148	2.23974	3.35385	2.50747	131.996	0.18597	0.155937	1.1926	0.233028	0.43655	NOT
ENSMUSG00000007591	1717	5	2	3	1	1	2	4	1	Tssk4	0.317163	0.119855	0.171381	0.0610399	0.0587527	0.135608	0.245745	0.0559019	2.37283	-0.175553	1.00777	-0.174199	0.861709	NA	NOT
ENSMUSG00000007594	3924	56	79	109	53	58	67	82	54	Hapln4	1.55433	2.07154	2.72464	1.41557	1.49107	1.98779	2.20435	1.32087	68.6126	0.159139	0.247208	0.643747	0.51974	0.708848	NOT
ENSMUSG00000007603	2944	142	206	170	147	200	127	170	182	Dus3l	5.25332	7.19987	5.66399	5.23316	6.85315	5.02217	6.09125	5.93377	166.635	-0.177134	0.179401	-0.987364	0.323464	0.53636	NOT
ENSMUSG00000007610	3984	128	191	128	157	165	122	115	125	Gtpbp3	3.49924	4.93298	3.15139	4.13014	4.17794	3.56505	3.0449	3.01153	141.373	-0.136414	0.223614	-0.610041	0.541834	0.724966	NOT
ENSMUSG00000007613	6534	390	599	656	576	423	366	821	443	Tgfbr1	6.50083	9.43286	9.84773	9.23906	6.53069	6.5212	13.2544	6.50761	518.293	0.421785	0.116712	3.61389	0.000301635	0.0028792	NOT
ENSMUSG00000007617	11976	141	127	171	105	127	115	182	137	Homer1	1.2823	1.09116	1.40054	0.918886	1.06977	1.11792	1.60308	1.09801	136.373	-0.124437	0.182208	-0.682941	0.494644	0.688618	NOT
ENSMUSG00000007646	4384	4	5	9	8	3	6	8	4	Rad51c	0.0993739	0.117353	0.201365	0.191251	0.0690317	0.159333	0.192493	0.0875762	5.72651	0.51895	0.630418	0.823184	0.410403	0.619352	NOT
ENSMUSG00000007653	6360	0	0	0	0	0	0	0	0	Gabrb2	0	0	0	0	0	0	0	0	0	NA	NA	NA	NA	NA	NA
ENSMUSG00000007655	3444	52	35	98	56	24	22	82	32	Cav1	1.64446	1.04568	2.79109	1.70416	0.702985	0.743678	2.51157	0.891833	47.8133	0.751534	0.350915	2.14164	0.0322222	0.11101	UP
ENSMUSG00000007656	4957	379	429	624	720	421	227	511	334	Arpp19	8.32728	8.905	12.3474	15.2229	8.56764	5.33129	10.8742	6.46732	442.442	0.474428	0.203168	2.33515	0.0195357	0.0768525	NOT
ENSMUSG00000007659	4586	367	720	447	658	423	380	563	492	Bcl2l1	8.71596	16.1545	9.5606	15.0375	9.30474	9.64661	12.95	10.2974	498.022	0.260581	0.1829	1.42471	0.15424	0.333687	NOT
ENSMUSG00000007670	4319	426	566	601	626	625	477	656	528	Khsrp	10.7426	13.4843	13.6491	15.1906	14.5981	12.8576	16.022	11.734	556.214	-0.0277308	0.128908	-0.215121	0.829673	0.914572	NOT
ENSMUSG00000007682	5815	1	0	0	0	0	0	4	0	Dio2	0.0187298	0	0	0	0	0	0.0725614	0	0.558828	1.3444	2.64484	0.508313	0.611234	NA	NOT
ENSMUSG00000007721	1696	183	283	216	332	297	155	220	282	Ccdc124	11.7519	17.1694	12.4922	20.5162	17.6656	10.6397	13.6833	15.9595	243.073	-0.0496292	0.224502	-0.221063	0.825043	0.911817	NOT
ENSMUSG00000007739	4201	964	1056	1236	1269	1081	918	1308	1047	Cct4	24.9924	25.8647	28.8587	31.6587	25.958	25.4399	32.8436	23.9216	1095.55	-0.00400036	0.098281	-0.0407033	0.967532	0.984498	NOT
ENSMUSG00000007777	998	158	146	188	197	176	135	193	192	0610009B22Rik	17.2429	15.0528	18.4773	20.6881	17.7902	15.7481	20.3996	18.4658	171.167	-0.14678	0.148401	-0.989073	0.322627	0.535478	NOT
ENSMUSG00000007783	5605	1	10	28	8	5	3	25	6	Cpt1c	0.0194315	0.183578	0.489998	0.149589	0.0899896	0.0623119	0.4705	0.102748	9.77722	1.95011	0.633003	3.08072	0.00206498	0.0131854	UP
ENSMUSG00000007805	3174	0	2	3	3	0	1	2	1	Twist2	0	0.0648364	0.0927099	0.0990601	0	0.0366791	0.0664689	0.0302406	1.40348	2.04778	1.42407	1.43797	0.150442	NA	NOT
ENSMUSG00000007812	5598	766	776	880	727	547	568	907	780	Zfp655	14.9032	14.2634	15.4192	13.6109	9.85718	11.8125	17.0911	13.3739	732.772	0.0211929	0.140271	0.151086	0.879908	0.942052	NOT
ENSMUSG00000007815	7494	1321	1461	1753	1717	1266	1230	1996	1341	Rhoa	19.1987	20.0601	22.9446	24.0127	17.0419	19.1081	28.0958	17.1756	1483.84	0.134207	0.104838	1.28013	0.200498	0.396922	NOT
ENSMUSG00000007817	12523	624	1031	867	905	686	592	1145	896	Zmiz1	5.42699	8.47122	6.79082	7.57399	5.52604	5.50349	9.64478	6.86747	823.965	0.225522	0.133391	1.69069	0.0908967	0.234217	NOT
ENSMUSG00000007827	7253	90	95	86	61	86	96	91	76	Ankrd26	1.35147	1.34773	1.16303	0.881447	1.19613	1.54092	1.32348	1.00576	85.6096	-0.358594	0.218957	-1.63774	0.101477	0.2523	NOT
ENSMUSG00000007833	5622	533	668	481	423	706	544	415	754	Aldh16a1	10.3257	12.2259	8.39201	7.88558	12.6681	11.2651	7.78668	12.8729	570.48	-0.611104	0.18999	-3.21651	0.00129762	0.00912935	DOWN
ENSMUSG00000007836	2678	791	1840	1001	1740	1538	779	1268	896	Hnrnpa0	32.1698	70.6973	36.6636	68.0962	57.9354	33.8651	49.9464	32.114	1212.09	0.29439	0.253179	1.16277	0.244922	0.450627	NOT
ENSMUSG00000007837	2581	246	253	285	339	275	195	260	288	Prrg2	10.3808	10.0862	10.831	13.7656	10.7484	8.79573	10.6263	10.7103	264.82	-0.0897745	0.156213	-0.574691	0.5655	0.74317	NOT
ENSMUSG00000007850	5842	1068	1055	1561	1242	1130	957	1722	1095	Hnrnph1	19.911	18.5817	26.2091	22.2815	19.5126	19.0711	31.0933	17.9908	1203.6	0.0970671	0.130024	0.746534	0.455345	0.657884	NOT
ENSMUSG00000007867	1651	24	32	38	40	38	17	38	35	Ift43	1.58324	1.99434	2.25761	2.5392	2.32185	1.19875	2.42791	2.03478	31.962	0.109631	0.292395	0.374941	0.707705	0.840954	NOT
ENSMUSG00000007872	1791	315	866	871	1397	559	221	1263	637	Id3	19.1557	49.7528	47.7017	81.7495	31.4858	14.3655	74.388	34.1382	725.33	1.10137	0.25744	4.27817	1.88e-05	0.000289298	UP
ENSMUSG00000007877	948	0	0	0	0	0	0	0	0	Tcap	0	0	0	0	0	0	0	0	0	NA	NA	NA	NA	NA	NA
ENSMUSG00000007880	11476	871	1283	1049	1049	1168	880	1216	1159	Arid1a	8.26629	11.5035	8.96595	9.58008	10.2672	8.92724	11.1773	9.6937	1073.48	-0.0974117	0.131393	-0.741376	0.458465	0.659979	NOT
ENSMUSG00000007888	1644	2	0	0	1	1	1	1	0	Crlf1	0.132499	0	0	0.0637503	0.0613615	0.0708147	0.0641643	0	0.791371	-1.32428	1.80053	-0.735491	0.46204	NA	NOT
ENSMUSG00000007891	2351	2469	3391	3449	3876	2986	2229	3938	2436	Ctsd	114.38	148.413	143.897	172.789	128.125	110.378	176.693	99.4538	3034.31	0.252293	0.118056	2.13706	0.0325935	0.111968	NOT
ENSMUSG00000007892	499	2102	3736	2704	4220	3261	2078	3490	2367	Rplp1	458.791	770.374	531.518	886.331	659.247	484.809	737.769	455.297	2941.8	0.262778	0.186281	1.41066	0.158346	0.339945	NOT
ENSMUSG00000007907	1505	0	0	0	0	0	0	0	0	Cabs1	0	0	0	0	0	0	0	0	0	NA	NA	NA	NA	NA	NA
ENSMUSG00000007908	5449	0	0	3	0	0	1	6	2	Hmgcll1	0	0	0.0540028	0	0	0.0213653	0.116153	0.0352298	1.34739	1.25573	1.67954	0.747659	0.454666	NA	NOT
ENSMUSG00000007944	2052	0	1	0	0	0	0	1	0	Ttc9b	0	0.0501439	0	0	0	0	0.0514065	0	0.225166	1.14894	3.44656	0.333358	0.738864	NA	NOT
ENSMUSG00000007946	2035	0	0	0	0	0	0	0	0	Phox2a	0	0	0	0	0	0	0	0	0	NA	NA	NA	NA	NA	NA
ENSMUSG00000007950	4079	44	55	72	66	65	44	70	58	Abhd8	1.17485	1.38741	1.73137	1.6958	1.60753	1.25581	1.81025	1.36481	58.1716	0.0387287	0.215127	0.180028	0.857131	0.930071	NOT
ENSMUSG00000007987	3608	41	42	66	69	53	33	53	39	Ift22	1.23766	1.19778	1.79427	2.00432	1.48186	1.06481	1.54955	1.03752	48.5102	0.190102	0.25714	0.739294	0.459728	0.661114	NOT
ENSMUSG00000007989	12804	4	9	13	11	5	4	26	3	Fzd3	0.0340249	0.0723256	0.0995885	0.0900391	0.0393933	0.0363697	0.214202	0.0224891	8.70472	1.57385	0.588172	2.67584	0.00745424	0.036631	UP
ENSMUSG00000008028	3675	1	0	0	1	0	3	2	1	1700008O03Rik	0.0296364	0	0	0.0285185	0	0.0950362	0.0574074	0.026118	1.05045	-1.10029	1.64116	-0.670435	0.50258	NA	NOT
ENSMUSG00000008035	2128	50	79	70	77	70	30	74	60	Mid1ip1	2.55907	3.81989	3.22655	3.79231	3.31837	1.64125	3.66822	2.7063	62.1852	0.252108	0.241284	1.04486	0.296086	0.50854	NOT
ENSMUSG00000008036	1472	437	493	582	617	566	440	529	590	Ap2s1	32.3338	34.4615	38.7817	43.93	38.7888	34.7993	37.9091	38.4717	526.773	-0.144906	0.128742	-1.12555	0.260357	0.468818	NOT
ENSMUSG00000008090	2782	379	516	238	262	342	319	308	460	Fgfrl1	14.8376	19.0848	8.39134	9.87026	12.4013	13.3493	11.6785	15.8708	355.351	-0.436402	0.244512	-1.78479	0.0742949	0.202437	NOT
ENSMUSG00000008129	2406	1	1	5	2	0	2	1	3	4930432K21Rik	0.0452676	0.0427661	0.203838	0.0871202	0	0.0967742	0.0438429	0.11968	1.81752	0.298446	1.17995	0.25293	0.800322	NA	NOT
ENSMUSG00000008136	1897	15	6	39	29	13	6	50	7	Fhl2	0.861206	0.325446	2.01655	1.60219	0.691312	0.368222	2.78034	0.354183	19.1852	1.27643	0.539599	2.36552	0.0180048	0.0719894	UP
ENSMUSG00000008140	2917	688	854	730	832	996	638	799	701	Emc10	25.6883	30.1243	24.547	29.8931	34.4446	25.463	28.8939	23.0663	776.182	-0.184393	0.158679	-1.16205	0.245214	0.451018	NOT
ENSMUSG00000008153	5867	195	125	175	105	354	123	85	173	Clstn3	3.61994	2.19225	2.92573	1.87567	6.08675	2.4407	1.52826	2.83026	169.685	-1.0517	0.297453	-3.53569	0.000406707	0.00364868	DOWN
ENSMUSG00000008167	3383	208	217	229	301	205	195	208	209	Fbxw9	6.69645	6.60014	6.63965	9.325	6.11294	6.71055	6.4857	5.92982	220.207	-0.052816	0.17449	-0.302688	0.762128	0.874315	NOT
ENSMUSG00000008193	2868	16	9	16	16	13	9	12	11	Spib	0.607608	0.322893	0.547208	0.584689	0.457259	0.365333	0.441364	0.368138	12.6683	-0.17206	0.436267	-0.39439	0.693293	0.832396	NOT
ENSMUSG00000008200	6583	368	461	459	370	371	372	574	459	Fnbp4	6.08845	7.20564	6.83912	5.89064	5.68523	6.57876	9.19779	6.69246	423.234	-0.0387364	0.136666	-0.28344	0.77684	0.882391	NOT
ENSMUSG00000008206	12264	55	65	76	64	73	53	105	58	Cers4	0.488443	0.545352	0.607845	0.54693	0.600467	0.503117	0.903134	0.453934	67.2209	0.0843102	0.219023	0.384938	0.700284	0.836543	NOT
ENSMUSG00000008226	4815	566	393	563	519	508	536	495	668	Scrn3	12.8027	8.39831	11.469	11.2968	10.643	12.9597	10.8444	13.3161	532.533	-0.494369	0.134335	-3.68012	0.000233125	0.00234474	NOT
ENSMUSG00000008301	2223	181	278	259	340	240	169	243	272	Phax	8.86793	12.8677	11.428	16.0296	10.8911	8.8506	11.5309	11.7443	243.578	0.119199	0.179947	0.662414	0.507706	0.699296	NOT
ENSMUSG00000008305	8711	695	1018	863	941	1032	638	884	936	Tle1	8.6896	12.0247	9.7175	11.3215	11.9512	8.52664	10.7048	10.3135	866.646	-0.0945505	0.152755	-0.618968	0.535938	0.721321	NOT
ENSMUSG00000008307	3062	32	49	34	42	19	16	57	17	1700109H08Rik	1.13822	1.64659	1.08914	1.43757	0.62596	0.608331	1.96365	0.532894	32.0769	0.826447	0.32966	2.50697	0.0121772	0.0535675	UP
ENSMUSG00000008318	3280	14	32	12	20	25	22	36	14	Relt	0.464876	1.00386	0.358855	0.639058	0.76889	0.780862	1.15777	0.409686	21.6447	0.124289	0.418908	0.296697	0.766698	0.876886	NOT
ENSMUSG00000008333	2857	124	142	176	145	119	121	180	157	Snrpb2	4.7271	5.11415	6.04246	5.31915	4.20179	4.93061	6.64596	5.27456	143.128	0.0194938	0.151842	0.128382	0.897847	0.951494	NOT
ENSMUSG00000008348	2893	1544	1374	2213	1331	1800	1706	1761	2909	Ubc	58.1275	48.869	75.0317	48.2185	62.7657	68.6524	64.2105	96.5144	1820.4	-0.527984	0.183657	-2.87484	0.00404232	0.0224667	DOWN
ENSMUSG00000008373	5439	116	173	138	169	150	113	135	121	Prpf31	2.32285	3.27282	2.48869	3.25651	2.78208	2.41871	2.61824	2.13532	138.217	0.0267997	0.189719	0.14126	0.887665	0.946197	NOT
ENSMUSG00000008384	1344	38	107	123	140	61	44	138	75	Sertad1	3.07941	8.19181	8.97671	10.9172	4.57856	3.81135	10.8312	5.35623	86.4725	0.95127	0.211374	4.50041	6.78e-06	0.000121628	UP
ENSMUSG00000008393	2858	990	1150	1327	1315	1074	942	1275	1238	Carhsp1	37.7273	41.4029	45.5429	48.2223	37.9088	38.372	47.0591	41.5772	1148.62	-0.0213581	0.0955016	-0.223641	0.823036	0.910661	NOT
ENSMUSG00000008398	4550	181	164	298	278	191	155	290	143	Elk3	4.33262	3.70875	6.42416	6.4035	4.23467	3.96593	6.72329	3.01663	207.17	0.321175	0.198202	1.62044	0.105137	0.25848	NOT
ENSMUSG00000008429	5857	538	510	656	512	492	567	637	652	Herpud2	10.0044	8.95964	10.986	9.16176	8.47399	11.2702	11.4725	10.6849	567.4	-0.248442	0.1278	-1.94399	0.0518965	0.157059	NOT
ENSMUSG00000008435	6595	114	283	234	197	195	120	242	178	Rdh13	1.88267	4.41537	3.48027	3.13066	2.98276	2.11832	3.87076	2.59061	190.048	0.390981	0.192275	2.03345	0.0420073	0.134649	NOT
ENSMUSG00000008438	2911	1	1	0	0	0	0	0	0	Adam21	0.0374146	0.0353471	0	0	0	0	0	0	0.263375	-0.28377	3.26906	-0.0868049	0.930827	NA	NOT
ENSMUSG00000008450	2034	100	153	193	169	132	120	213	150	Nutf2	5.35466	7.73991	9.30718	8.70803	6.54668	6.8684	11.0465	7.07843	149.842	0.252585	0.1571	1.6078	0.107879	0.262677	NOT
ENSMUSG00000008461	2786	4	4	4	6	7	6	2	4	Fut1	0.156373	0.147732	0.140828	0.225712	0.253463	0.250724	0.0757258	0.137808	4.73177	-0.669712	0.704598	-0.950487	0.341865	0.55523	NOT
ENSMUSG00000008475	2276	953	1250	1408	1415	1050	956	1341	1129	Arpc5	45.6041	56.511	60.6795	65.1581	46.5388	48.9002	62.1515	47.6122	1168.47	0.125522	0.0976086	1.28597	0.198452	0.394214	NOT
ENSMUSG00000008482	1195	0	1	1	1	0	0	0	0	Rnf151	0	0.0861048	0.0820812	0.0877034	0	0	0	0	0.34682	1.77413	2.58243	0.686999	0.492083	NA	NOT
ENSMUSG00000008489	8313	1	0	0	0	0	0	0	0	Elavl2	0.0131016	0	0	0	0	0	0	0	0.142333	-1.0051	3.53381	-0.284424	0.776085	NA	NOT
ENSMUSG00000008496	8243	44	72	95	63	75	55	113	62	Pou2f2	0.581367	0.898758	1.13045	0.801013	0.917855	0.776788	1.44607	0.721944	70.3314	0.249087	0.23145	1.0762	0.281837	0.493496	NOT
ENSMUSG00000008540	2013	15928	13074	13044	15493	16933	13748	10871	15530	Mgst1	861.788	668.283	635.592	806.633	848.571	795.099	569.667	740.499	14455.3	-0.516432	0.14942	-3.45624	0.000547777	0.00464481	DOWN
ENSMUSG00000008575	14957	1305	789	1116	914	906	1089	1132	1117	Nfib	9.50274	5.42785	7.31866	6.40451	6.11057	8.47635	7.98357	7.16812	1050.42	-0.462655	0.157291	-2.9414	0.00326728	0.019031	NOT
ENSMUSG00000008590	2411	0	0	0	0	0	0	0	0	Htr3b	0	0	0	0	0	0	0	0	0	NA	NA	NA	NA	NA	NA
ENSMUSG00000008601	1673	3	4	4	2	2	4	4	1	Rab25	0.195303	0.246014	0.234518	0.125291	0.120596	0.278349	0.252208	0.0573721	2.99406	0.170357	0.869854	0.195846	0.844731	0.922882	NOT
ENSMUSG00000008604	4147	454	418	509	441	509	380	405	514	Ubqln4	11.9235	10.3714	12.0391	11.1452	12.3817	10.6678	10.3019	11.8967	452.579	-0.341948	0.125379	-2.72731	0.00638535	0.0323626	NOT
ENSMUSG00000008658	4400	0	1	0	0	3	0	1	0	Rbfox1	0	0.0233853	0	0	0.0687807	0	0.0239741	0	0.62026	-0.836576	2.301	-0.363571	0.716178	NA	NOT
ENSMUSG00000008668	2451	1778	2593	2113	2584	2563	2014	2292	2311	Rps18	79.0081	108.857	84.5605	110.493	105.488	95.6624	98.6431	90.501	2267.55	-0.124391	0.146613	-0.848433	0.396197	0.607043	NOT
ENSMUSG00000008682	2053	3034	4449	3912	4352	3842	3359	3860	4202	Rpl10	160.957	222.982	186.905	222.169	188.785	190.479	198.332	196.455	3843.14	-0.0694321	0.129126	-0.537709	0.590778	0.76312	NOT
ENSMUSG00000008683	6270	892	1372	1371	1621	1078	946	1640	969	Rps15a	15.4946	22.5155	21.4477	27.0957	17.344	17.565	27.5913	14.8338	1208.48	0.343652	0.121253	2.83418	0.00459439	0.0249438	NOT
ENSMUSG00000008690	4198	428	558	603	510	600	509	531	587	Ncaph2	11.1041	13.6769	14.0892	12.7325	14.4181	14.1156	13.3428	13.4212	537.921	-0.225482	0.130232	-1.73139	0.0833825	0.220232	NOT
ENSMUSG00000008730	10914	1115	1222	1301	1154	1055	1046	1353	1233	Hipk1	11.1269	11.5208	11.6924	11.0817	9.75139	11.1577	13.077	10.8437	1174.3	-0.107432	0.0950757	-1.12996	0.258494	0.466394	NOT
ENSMUSG00000008734	4630	15	24	64	35	18	13	88	13	Gprc5b	0.352853	0.533367	1.35585	0.792267	0.392184	0.326879	2.00492	0.2695	31.1951	1.52163	0.398303	3.8203	0.000133292	0.00147725	UP
ENSMUSG00000008763	7969	718	777	959	752	793	661	984	819	Man1a2	9.81304	10.0326	11.8039	9.89005	10.0385	9.65657	13.0253	9.86454	796.984	-0.0706211	0.100309	-0.704033	0.481412	0.678455	NOT
ENSMUSG00000008789	3273	0	0	0	0	0	0	0	0	Ceacam5	0	0	0	0	0	0	0	0	0	NA	NA	NA	NA	NA	NA
ENSMUSG00000008813	742	0	0	0	0	0	0	0	0	Tppp2	0	0	0	0	0	0	0	0	0	NA	NA	NA	NA	NA	NA
ENSMUSG00000008822	1380	29	34	48	65	51	20	37	38	Acyp1	2.28877	2.5351	3.41172	4.93649	3.72811	1.68724	2.82825	2.64303	39.3746	0.155985	0.324506	0.480684	0.630741	0.790587	NOT
ENSMUSG00000008843	1067	0	0	0	0	0	0	0	0	Cldn13	0	0	0	0	0	0	0	0	0	NA	NA	NA	NA	NA	NA
ENSMUSG00000008845	5461	312	408	201	213	412	235	381	276	Cd163	6.22251	7.68747	3.61023	4.08782	7.61067	5.00981	7.3595	4.85103	304.362	-0.311396	0.254768	-1.22227	0.221606	0.423538	NOT
ENSMUSG00000008855	8780	497	517	574	907	554	560	683	629	Hdac5	6.16517	6.05887	6.41252	10.8267	6.36522	7.42538	8.20581	6.87627	609.109	-0.0196059	0.18294	-0.107171	0.914653	0.959148	NOT
ENSMUSG00000008859	2899	254	250	307	314	288	246	304	286	Rala	9.54264	8.87334	10.3873	11.3518	10.0217	9.87898	11.0617	9.46923	278.89	-0.152771	0.125246	-1.21976	0.222555	0.424489	NOT
ENSMUSG00000008874	591	0	0	0	0	0	0	0	0	Clec3a	0	0	0	0	0	0	0	0	0	NA	NA	NA	NA	NA	NA
ENSMUSG00000008892	5420	824	963	1172	1037	844	858	1145	935	Vdac3	16.5581	18.2819	21.21	20.0523	15.7087	18.4295	22.2844	16.5581	959.033	0.0309145	0.0996285	0.310298	0.756334	0.87098	NOT
ENSMUSG00000008932	3360	0	0	2	1	1	3	1	1	Slc1a7	0	0	0.0583851	0.0311921	0.0300233	0.103946	0.0313947	0.0285665	1.15182	-0.660743	1.47172	-0.44896	0.65346	NA	NOT
ENSMUSG00000008958	3639	105	171	135	185	176	111	170	128	Vps72	3.14261	4.83515	3.63884	5.32812	4.87898	3.55113	4.9279	3.37617	145.589	0.0757372	0.200207	0.378294	0.705213	0.839657	NOT
ENSMUSG00000008976	5687	626	659	675	600	598	604	718	668	Gabpa	11.9888	11.9233	11.6421	11.0574	10.6076	12.3646	13.3179	11.2743	640.396	-0.198657	0.107354	-1.85049	0.0642431	0.18293	NOT
ENSMUSG00000008999	4019	12	19	27	9	9	3	51	17	Bmp7	0.325197	0.486442	0.658957	0.234698	0.225903	0.0869017	1.33859	0.406002	17.025	1.08385	0.541532	2.00146	0.0453434	0.14247	UP
ENSMUSG00000009013	3890	120	132	467	304	129	105	482	157	Dynll1	3.35981	3.49156	11.7755	8.19046	3.34532	3.14243	13.0705	3.87389	221.823	1.13532	0.288809	3.93103	8.46e-05	0.00100694	UP
ENSMUSG00000009030	3751	236	274	250	327	220	195	252	278	Pdcl	6.85248	7.51621	6.53739	9.13661	5.91662	6.05219	7.08678	7.11368	251.441	-0.0207829	0.162393	-0.127979	0.898166	0.951686	NOT
ENSMUSG00000009035	4702	291	211	381	290	274	227	352	260	Tmem184b	6.74052	4.61738	7.94793	6.46397	5.87849	5.62042	7.89688	5.30747	281.662	-0.0661682	0.169944	-0.389352	0.697016	0.83437	NOT
ENSMUSG00000009047	833	0	0	0	0	0	0	0	0	Gm5965	0	0	0	0	0	0	0	0	0	NA	NA	NA	NA	NA	NA
ENSMUSG00000009070	3012	1	1	0	0	0	1	0	1	Rsph14	0.03616	0.0341618	0	0	0	0.0386518	0	0.0318671	0.539189	-1.60443	2.10089	-0.763689	0.445053	NA	NOT
ENSMUSG00000009073	6825	392	387	478	376	418	354	442	445	Nf2	6.25556	5.8345	6.86968	5.7739	6.17834	6.03846	6.83148	6.25827	408.424	-0.21807	0.109389	-1.99352	0.0462042	0.14453	NOT
ENSMUSG00000009075	2628	1	0	0	0	0	1	0	0	Cabp7	0.0414436	0	0	0	0	0.0442996	0	0	0.295502	-1.79436	3.15093	-0.569469	0.569038	NA	NOT
ENSMUSG00000009076	1248	30	19	24	29	29	30	30	35	Zmat5	2.61812	1.56651	1.88629	2.43539	2.34413	2.79854	2.53572	2.69185	28.4076	-0.567364	0.29293	-1.93686	0.0527627	0.158733	NOT
ENSMUSG00000009079	5907	1043	1454	1170	1274	1439	859	1407	1094	Ewsr1	19.2309	25.3275	19.4281	22.6041	24.5749	16.9298	25.1259	17.7765	1202.61	-0.0119952	0.154434	-0.0776723	0.938089	0.97074	NOT
ENSMUSG00000009090	4957	1045	987	1260	918	1150	948	1082	1147	Ap1b1	22.9604	20.4877	24.9323	19.4092	23.4033	22.2646	23.0252	22.2096	1062.42	-0.298795	0.108391	-2.75663	0.00583999	0.0302256	NOT
ENSMUSG00000009092	1993	10	1	17	8	13	9	19	7	Derl3	0.546482	0.0516283	0.836668	0.420695	0.658013	0.525727	1.00564	0.337122	10.2506	-0.122537	0.614161	-0.19952	0.841856	0.921523	NOT
ENSMUSG00000009093	989	0	0	0	1	1	0	0	0	Gstt4	0	0	0	0.105971	0.102	0	0	0	0.249412	-0.28377	3.33071	-0.085198	0.932104	NA	NOT
ENSMUSG00000009097	3517	0	4	3	6	2	0	16	0	Tbx1	0	0.117026	0.0836682	0.178798	0.0573662	0	0.479891	0	3.44402	3.5453	1.29894	2.72937	0.00634549	0.0321896	UP
ENSMUSG00000009108	2995	4	1	6	8	1	2	4	2	Gnat2	0.145461	0.0343557	0.196502	0.279948	0.0336823	0.0777425	0.140883	0.0640959	3.38029	0.77963	0.893914	0.872154	0.383124	0.595009	NOT
ENSMUSG00000009112	9089	840	1157	1361	1185	1085	714	1451	1021	Bcl2l13	10.0658	13.0982	14.6877	13.6643	12.0424	9.1455	16.8402	10.7822	1074.73	0.216437	0.112489	1.92407	0.0543461	0.1618	NOT
ENSMUSG00000009114	1705	0	1	0	0	0	1	0	2	2610028H24Rik	0	0.0603491	0	0	0	0.0682812	0	0.112591	0.519501	-1.55504	2.33928	-0.664752	0.506209	NA	NOT
ENSMUSG00000009115	1332	4	0	1	1	1	2	0	2	Spatc1l	0.327069	0	0.0736389	0.0786828	0.0757345	0.174804	0	0.144119	1.47844	-2.46388	1.45821	-1.68966	0.0910928	NA	NOT
ENSMUSG00000009145	3419	170	160	197	130	151	185	168	236	Dqx1	5.41543	4.81522	5.65169	3.985	4.45529	6.29938	5.18329	6.62536	174.814	-0.463899	0.177907	-2.60754	0.00911953	0.0429168	NOT
ENSMUSG00000009185	511	2	5	5	1	1	0	3	0	Ccl8	0.426277	1.0068	0.959756	0.205099	0.197414	0	0.619292	0	1.99198	1.93263	1.26711	1.52523	0.127202	NA	NOT
ENSMUSG00000009207	9154	104	108	123	82	66	73	148	101	Lnpk	1.23739	1.21397	1.31797	0.938831	0.727329	0.928404	1.70548	1.05903	98.4905	0.130561	0.220076	0.593254	0.553011	0.733389	NOT
ENSMUSG00000009210	1724	1	0	0	1	1	0	3	0	Prr29	0.0631751	0	0	0.0607921	0.0585141	0	0.18356	0	0.704116	0.65545	2.00263	0.327295	0.743444	NA	NOT
ENSMUSG00000009214	1511	0	0	0	0	0	0	0	0	Mymk	0	0	0	0	0	0	0	0	0	NA	NA	NA	NA	NA	NA
ENSMUSG00000009216	2959	0	1	0	0	0	0	2	0	Fam163b	0	0.0347737	0	0	0	0	0.0712985	0	0.32929	1.71302	3.02104	0.56703	0.570694	NA	NOT
ENSMUSG00000009246	6398	22	12	4	3	20	20	1	14	Trpm5	0.374508	0.192989	0.0613236	0.049143	0.315343	0.363924	0.0164874	0.21003	12.8877	-2.1954	0.586736	-3.74171	0.00018277	0.00191959	DOWN
ENSMUSG00000009248	1623	0	0	0	0	0	0	0	0	Ascl2	0	0	0	0	0	0	0	0	0	NA	NA	NA	NA	NA	NA
ENSMUSG00000009281	2656	1210	2501	1674	2374	1751	1071	1703	1536	Rarres2	49.6181	96.8905	61.8214	93.6778	66.5053	46.9447	67.6366	55.5086	1695.65	0.315856	0.196637	1.60629	0.10821	0.26318	NOT
ENSMUSG00000009291	3877	3653	3938	3761	3404	3327	3616	3545	4402	Pttg1ip	102.621	104.514	95.1523	92.0191	86.5675	108.582	96.453	108.981	3704.75	-0.311974	0.122159	-2.55385	0.010654	0.0482781	NOT
ENSMUSG00000009292	12459	151	265	205	183	263	171	286	211	Trpm2	1.32001	2.18856	1.61392	1.5394	2.12947	1.59786	2.42146	1.62553	213.749	-0.0368088	0.197052	-0.186798	0.851819	0.926831	NOT
ENSMUSG00000009293	2431	311	530	429	553	426	277	459	380	Ube2g2	13.9334	22.433	17.3095	23.841	17.6776	13.2654	19.917	15.0036	412.802	0.23633	0.163552	1.44498	0.148463	0.325018	NOT
ENSMUSG00000009350	3424	6	22	7	0	26	7	22	14	Mpo	0.190854	0.661126	0.200528	0	0.766016	0.238007	0.677773	0.392456	12.7775	-0.312354	0.749906	-0.416524	0.677027	0.821531	NOT
ENSMUSG00000009356	3135	0	0	0	0	0	0	0	0	Lpo	0	0	0	0	0	0	0	0	0	NA	NA	NA	NA	NA	NA
ENSMUSG00000009376	7679	1458	856	1442	835	1314	1538	1158	1557	Met	20.6793	11.47	18.4193	11.3964	17.2619	23.3172	15.9074	19.4617	1285.41	-0.754133	0.166617	-4.52615	6.01e-06	0.000110061	DOWN
ENSMUSG00000009378	4170	558	534	500	592	665	510	540	511	Slc16a12	14.5741	13.1765	11.761	14.8789	16.0873	14.2383	13.6601	11.762	552.371	-0.331774	0.144617	-2.29415	0.0217817	0.082846	NOT
ENSMUSG00000009394	7031	1	7	5	8	7	1	10	3	Syn2	0.0154905	0.102442	0.0697533	0.11925	0.100434	0.016558	0.15003	0.0409544	4.95589	1.06214	0.750061	1.41606	0.156757	0.337477	NOT
ENSMUSG00000009406	5381	76	101	103	85	88	72	129	88	Elk1	1.53827	1.93132	1.87753	1.65554	1.64975	1.55774	2.52884	1.5697	91.0212	0.0827509	0.181493	0.455945	0.64843	0.801447	NOT
ENSMUSG00000009418	18814	143	206	282	234	169	171	440	187	Nav1	0.827824	1.12663	1.47021	1.30352	0.906157	1.05813	2.46699	0.95402	220.505	0.491627	0.203946	2.41057	0.0159276	0.0656617	NOT
ENSMUSG00000009470	11212	1452	1292	1677	1412	1150	1300	1791	1401	Tnpo1	14.1048	11.857	14.6711	13.1988	10.347	13.4985	16.8503	11.9937	1419.37	-0.0780882	0.130053	-0.600433	0.548218	0.730019	NOT
ENSMUSG00000009471	1861	0	0	0	0	0	0	0	0	Myod1	0	0	0	0	0	0	0	0	0	NA	NA	NA	NA	NA	NA
ENSMUSG00000009487	10349	0	0	0	0	0	0	0	0	Otog	0	0	0	0	0	0	0	0	0	NA	NA	NA	NA	NA	NA
ENSMUSG00000009535	7339	238	329	310	297	200	192	354	248	Rnmt	3.53202	4.61269	4.1432	4.24135	2.7491	3.04572	5.08817	3.24348	265.183	0.274018	0.135586	2.02099	0.0432812	0.137425	NOT
ENSMUSG00000009545	4093	15	17	32	28	35	16	51	28	Kcnq1	0.399147	0.427369	0.766867	0.716969	0.86263	0.455096	1.31439	0.656619	26.7513	0.160286	0.375804	0.426516	0.669732	0.815787	NOT
ENSMUSG00000009549	1195	285	284	406	409	294	245	316	323	Srp14	25.9753	24.4538	33.325	35.8707	24.8186	23.8684	27.8942	25.9437	315.723	0.0256491	0.154159	0.166381	0.867857	0.936203	NOT
ENSMUSG00000009551	1431	3	2	4	0	2	1	5	2	6330409D20Rik	0.228331	0.143809	0.274178	0	0.14099	0.0813553	0.368575	0.134149	2.28381	0.150007	1.04175	0.143995	0.885504	NA	NOT
ENSMUSG00000009555	4611	403	608	513	549	484	367	566	489	Cdk9	9.51904	13.5676	10.9127	12.4785	10.5888	9.26608	12.9484	10.1791	489.878	0.0885812	0.127781	0.693225	0.488168	0.682867	NOT
ENSMUSG00000009563	3050	306	467	339	384	426	314	353	415	Tor2a	10.9271	15.7548	10.9021	13.1952	14.0899	11.9855	12.2087	13.0601	373.768	-0.183897	0.169374	-1.08574	0.277593	0.488504	NOT
ENSMUSG00000009566	3802	2591	2237	2443	2983	3316	2359	1907	3222	Fpgs	74.223	60.541	63.0265	82.2291	87.9834	72.2339	52.9095	81.3412	2646.46	-0.526659	0.164979	-3.19228	0.00141156	0.00976382	DOWN
ENSMUSG00000009569	8990	485	392	809	768	355	424	774	595	Mrtfb	5.87577	4.48665	8.82674	8.95335	3.98352	5.49075	9.0819	6.35264	559.57	0.270163	0.211381	1.27809	0.201219	0.397929	NOT
ENSMUSG00000009575	9006	407	475	468	405	308	314	606	441	Cbx5	4.92204	5.42697	5.09713	4.71311	3.44998	4.05904	7.098	4.70006	419.516	0.125404	0.153653	0.816152	0.414413	0.622784	NOT
ENSMUSG00000009580	1376	0	0	0	0	0	0	0	0	Odam	0	0	0	0	0	0	0	0	0	NA	NA	NA	NA	NA	NA
ENSMUSG00000009585	9454	66	145	159	124	90	81	279	99	Apobec3	0.760346	1.57815	1.64965	1.37464	0.96034	0.997458	3.11303	1.00512	124.176	0.777	0.2353	3.30217	0.00095941	0.00725236	UP
ENSMUSG00000009588	2392	0	0	0	0	0	0	0	0	St6galnac1	0	0	0	0	0	0	0	0	0	NA	NA	NA	NA	NA	NA
ENSMUSG00000009596	2245	0	1	0	0	0	0	0	0	Taf7l	0	0.0458331	0	0	0	0	0	0	0.121042	0.43757	3.53381	0.123824	0.901455	NA	NOT
ENSMUSG00000009614	5432	7834	7926	6129	6160	7607	7824	4945	11045	Sardh	157.075	150.138	110.673	118.852	141.271	167.685	96.0289	195.165	7531.58	-0.706607	0.180784	-3.90857	9.28e-05	0.00108563	DOWN
ENSMUSG00000009621	6915	631	747	839	722	688	636	849	830	Vav2	9.93848	11.1154	11.9009	10.9428	10.0368	10.7076	12.9512	11.5208	734.106	-0.0991371	0.0983954	-1.00754	0.313676	0.526238	NOT
ENSMUSG00000009628	9622	2	0	1	3	2	0	2	0	Tex15	0.0226385	0	0.010194	0.0326768	0.0209683	0	0.021926	0	1.21751	0.292325	1.50897	0.193725	0.846391	NA	NOT
ENSMUSG00000009630	1469	342	560	543	591	437	321	582	432	Ppp2cb	25.3564	39.2249	36.2568	42.1648	30.0094	25.4395	41.7923	28.2266	465.011	0.298763	0.120493	2.47951	0.0131563	0.0567055	NOT
ENSMUSG00000009633	871	3048	2403	3051	3092	4019	3160	2408	3488	G0s2	381.136	283.878	343.586	372.054	465.477	422.371	291.631	384.375	3110.19	-0.602085	0.139682	-4.3104	1.63e-05	0.000256012	DOWN
ENSMUSG00000009640	2636	131	132	163	138	114	112	129	159	Dmap1	5.41264	5.15257	6.06532	5.48678	4.36272	4.9465	5.16226	5.7896	133.583	-0.153864	0.1678	-0.916948	0.35917	0.571991	NOT
ENSMUSG00000009646	1182	405	643	506	582	500	384	514	524	Pla2g12b	37.3182	55.9743	41.9899	51.6048	42.6727	37.8215	45.8713	42.5511	501.116	0.044174	0.150024	0.294446	0.768417	0.877691	NOT
ENSMUSG00000009647	6936	190	165	229	192	178	141	227	215	Mcu	2.98351	2.44777	3.23846	2.90119	2.58886	2.36666	3.45233	2.97527	189.407	-0.114384	0.148109	-0.772296	0.439939	0.644482	NOT
ENSMUSG00000009654	2788	516	598	625	496	626	496	516	707	Oit3	20.1577	22.0701	21.9887	18.6455	22.6506	20.7116	19.5233	24.3402	570.606	-0.339279	0.132759	-2.55561	0.0106002	0.0481379	NOT
ENSMUSG00000009670	3624	0	0	0	0	0	0	0	1	Tex11	0	0	0	0	0	0	0	0.0264855	0.122645	-1.0051	3.53381	-0.284424	0.776085	NA	NOT
ENSMUSG00000009681	8191	592	364	574	448	596	506	511	635	Bcr	7.87169	4.57257	6.87364	5.73225	7.34019	7.19182	6.58081	7.44104	530.167	-0.584343	0.128905	-4.53313	5.81e-06	0.000107303	DOWN
ENSMUSG00000009687	4192	33	91	98	80	58	39	139	46	Fxyd5	0.857385	2.23365	2.29307	2.00011	1.39574	1.0831	3.49775	1.05325	69.4462	0.925992	0.235632	3.92983	8.5e-05	0.00101056	UP
ENSMUSG00000009731	5287	1	5	8	7	2	3	7	2	Kcnd1	0.0206003	0.0973097	0.14842	0.138763	0.0381609	0.0660598	0.139664	0.0363093	4.13311	1.46253	0.781874	1.87055	0.0614078	0.176963	NOT
ENSMUSG00000009733	8063	103	110	130	92	121	117	115	134	Tfcp2	1.39131	1.40376	1.58146	1.19585	1.51386	1.68933	1.50451	1.59516	115.118	-0.371431	0.169425	-2.1923	0.0283581	0.100957	NOT
ENSMUSG00000009734	6985	0	0	0	0	0	0	0	0	Pou6f2	0	0	0	0	0	0	0	0	0	NA	NA	NA	NA	NA	NA
ENSMUSG00000009739	6949	180	318	231	246	200	191	310	251	Pou6f1	2.8212	4.70869	3.26063	3.7102	2.90339	3.1999	4.70581	3.46696	236.689	0.153441	0.164901	0.930505	0.35211	0.565341	NOT
ENSMUSG00000009741	4757	722	996	910	874	746	679	908	906	Ubp1	16.5305	21.5438	18.7638	19.2558	15.8199	16.6174	20.1348	18.2807	832.452	-0.000161053	0.115572	-0.00139354	0.998888	0.999303	NOT
ENSMUSG00000009772	3920	141	214	163	186	217	159	180	224	Nuak2	3.91756	5.61724	4.07862	4.97292	5.58434	4.72211	4.84375	5.48478	184.628	-0.25947	0.180595	-1.43675	0.150789	0.328744	NOT
ENSMUSG00000009828	11524	192	177	369	308	217	186	317	216	Ick	1.8146	1.58039	3.14076	2.80112	1.89957	1.87904	2.90169	1.79907	241.45	0.2371	0.188765	1.25605	0.209096	0.408428	NOT
ENSMUSG00000009863	2239	1446	1890	1692	1474	1666	1511	1706	1761	Sdhb	70.3392	86.8567	74.1238	68.9966	75.0618	78.5662	80.3748	75.4922	1635.4	-0.194336	0.11923	-1.62992	0.103118	0.255326	NOT
ENSMUSG00000009876	788	0	2	4	5	0	1	1	1	Cox4i2	0	0.261156	0.497904	0.66501	0	0.14774	0.133866	0.121807	1.64285	2.32188	1.42296	1.63173	0.102737	NA	NOT
ENSMUSG00000009894	2651	699	499	607	589	611	628	530	862	Snap47	28.7178	19.3681	22.459	23.2857	23.2504	27.5788	21.0893	31.21	632.382	-0.608632	0.131093	-4.64276	3.44e-06	6.79e-05	DOWN
ENSMUSG00000009900	2761	0	0	0	0	0	0	0	0	Wnt3a	0	0	0	0	0	0	0	0	0	NA	NA	NA	NA	NA	NA
ENSMUSG00000009905	8147	459	309	540	379	561	362	398	461	Kdsr	6.13618	3.90262	6.50141	4.87557	6.94646	5.17292	5.15324	5.43125	433.011	-0.466025	0.168439	-2.76673	0.00566225	0.0295141	NOT
ENSMUSG00000009907	8905	854	819	1036	785	778	746	932	955	Vps4b	10.445	9.46336	11.4114	9.23889	8.81341	9.75282	11.0402	10.2936	855.94	-0.184842	0.111414	-1.65906	0.0971041	0.244676	NOT
ENSMUSG00000009927	2691	1355	2084	1871	2106	1700	1431	2078	1789	Rps25	54.8414	79.6855	68.198	82.0217	63.7284	61.9086	81.4568	63.8107	1774.06	0.102723	0.113816	0.902528	0.366776	0.579452	NOT
ENSMUSG00000009941	2568	1	1	0	0	0	0	1	0	Nxf2	0.0424119	0.0400683	0	0	0	0	0.0410771	0	0.367498	0.428923	2.59815	0.165088	0.868875	NA	NOT
ENSMUSG00000009995	5364	285	310	255	338	355	261	344	335	Taz	5.78681	5.9466	4.66297	6.60408	6.67633	5.6647	6.76495	5.9945	309.066	-0.260755	0.148322	-1.75803	0.0787418	0.210925	NOT
ENSMUSG00000010021	4068	5	8	5	8	5	5	14	8	Kif19a	0.133867	0.202351	0.120559	0.206107	0.12399	0.143092	0.36303	0.188758	7.02526	0.324411	0.580274	0.559065	0.576117	0.751673	NOT
ENSMUSG00000010025	5619	7020	5675	14563	9338	8991	5549	7452	6966	Aldh3a2	136.07	103.921	254.216	174.172	161.416	114.969	139.897	118.993	8023.35	0.0893111	0.231888	0.385148	0.700128	0.836543	NOT
ENSMUSG00000010044	2129	2	0	3	1	1	3	2	2	Zmynd10	0.102315	0	0.138216	0.0492276	0.047383	0.164048	0.0990945	0.0901677	1.77132	-0.743813	1.15333	-0.644925	0.518976	NA	NOT
ENSMUSG00000010045	2194	276	334	324	349	351	215	339	309	Tmem115	13.7011	15.6641	14.485	16.6714	16.1387	11.4085	16.2989	13.5182	308.159	-0.0445978	0.144028	-0.309647	0.756829	0.87112	NOT
ENSMUSG00000010047	3293	649	857	833	995	859	656	823	823	Hyal2	21.4653	26.7784	24.8122	31.6676	26.3148	23.192	26.3635	23.9886	803.488	-0.0380133	0.134255	-0.283143	0.777068	0.882542	NOT
ENSMUSG00000010048	2637	271	340	386	323	378	280	384	327	Ifrd2	11.1929	13.2667	14.3578	12.8374	14.4604	12.3616	15.3609	11.9024	332.218	-0.0911146	0.128319	-0.710061	0.477666	0.675505	NOT
ENSMUSG00000010051	3777	402	371	375	340	420	377	373	481	Hyal1	11.5921	10.107	9.73859	9.43444	11.2176	11.6204	10.4173	12.2235	393.559	-0.481716	0.11054	-4.35786	1.31e-05	0.000215583	NOT
ENSMUSG00000010054	1785	210	302	346	342	263	247	346	312	Tusc2	12.8134	17.4086	19.0129	20.0804	14.8633	16.1096	20.4472	16.777	290.854	0.0945265	0.131261	0.720139	0.471439	0.670355	NOT
ENSMUSG00000010057	2013	105	79	119	121	118	94	94	101	Nprl2	5.68105	4.03812	5.79849	6.29979	5.91339	5.43637	4.92583	4.81587	103.723	-0.301207	0.195533	-1.54044	0.123453	0.289436	NOT
ENSMUSG00000010064	5277	9517	9341	7364	6438	8508	8750	7297	10852	Slc38a3	196.425	182.139	136.879	127.864	162.644	193.04	145.865	197.387	8590.31	-0.579454	0.151071	-3.83565	0.000125234	0.00140025	DOWN
ENSMUSG00000010066	7947	0	0	0	0	1	0	1	1	Cacna2d2	0	0	0	0	0.0126939	0	0.0132737	0.012078	0.358467	-0.977971	2.61521	-0.373954	0.708438	NA	NOT
ENSMUSG00000010067	5845	60	115	140	176	79	55	197	69	Rassf1	1.11802	2.02446	2.34939	3.15582	1.36345	1.09548	3.55531	1.13308	106.11	0.971723	0.205012	4.73984	2.14e-06	4.54e-05	UP
ENSMUSG00000010080	4067	2	15	21	13	7	4	38	8	Epn3	0.0535598	0.379501	0.506473	0.335007	0.173629	0.114501	0.985609	0.188805	12.3724	1.76152	0.540112	3.26141	0.00110861	0.00811456	UP
ENSMUSG00000010086	3923	0	0	0	0	0	0	0	0	Rnf112	0	0	0	0	0	0	0	0	0	NA	NA	NA	NA	NA	NA
ENSMUSG00000010095	3529	401	902	591	864	557	342	675	489	Slc3a2	12.3759	26.2997	16.4266	25.6594	15.9221	11.2824	20.1766	13.3001	587.823	0.505786	0.193855	2.60909	0.00907839	0.042759	UP
ENSMUSG00000010097	4427	577	542	713	489	566	506	673	639	Nxf1	14.1955	12.5975	15.7976	11.5767	12.8975	13.3066	16.0362	13.8544	582.833	-0.208688	0.122227	-1.70738	0.0877516	0.228488	NOT
ENSMUSG00000010110	5808	472	489	650	563	543	473	598	676	Stx5a	8.85112	8.66319	10.9774	10.1594	9.43129	9.48112	10.861	11.1716	552.02	-0.189452	0.11862	-1.59714	0.110236	0.266567	NOT
ENSMUSG00000010122	3383	1186	927	1199	791	1161	1229	1002	1467	Slc47a1	38.1826	28.1951	34.7639	24.5052	34.6201	42.2936	31.2436	41.6222	1129.09	-0.651032	0.131999	-4.9321	8.14e-07	2.03e-05	DOWN
ENSMUSG00000010136	1127	0	0	0	0	0	0	0	0	Pifo	0	0	0	0	0	0	0	0	0	NA	NA	NA	NA	NA	NA
ENSMUSG00000010142	2836	9	17	22	16	8	13	27	10	Tnfrsf13b	0.345636	0.616791	0.760901	0.591287	0.284565	0.533657	1.00428	0.338447	14.6821	0.734874	0.413052	1.77913	0.0752177	0.204211	NOT
ENSMUSG00000010154	2510	3	6	35	29	7	3	27	7	Spire2	0.130176	0.245965	1.36775	1.2109	0.281334	0.139147	1.13471	0.267683	13.4004	1.99557	0.580357	3.43853	0.000584887	0.00488694	UP
ENSMUSG00000010175	8390	2586	1806	2344	1880	2616	1958	2061	3370	Prox1	33.5699	22.1489	27.4036	23.4844	31.4539	27.1691	25.9126	38.5536	2333.62	-0.651581	0.124966	-5.21408	1.85e-07	5.76e-06	DOWN
ENSMUSG00000010205	3470	0	0	0	0	0	0	0	0	Raver1	0	0	0	0	0	0	0	0	0	NA	NA	NA	NA	NA	NA
ENSMUSG00000010277	8798	2428	2034	2464	2182	2314	2128	2394	2887	2610507B11Rik	30.0571	23.7882	27.4706	25.9929	26.5325	28.1587	28.7035	31.4963	2348.95	-0.385265	0.0915988	-4.20601	2.6e-05	0.000376095	NOT
ENSMUSG00000010290	3458	123	165	156	158	131	147	216	138	AI597479	3.87403	4.90969	4.42498	4.78869	3.82159	4.949	6.58907	3.83046	152.12	0.0743256	0.169215	0.439236	0.66049	0.809796	NOT
ENSMUSG00000010307	1887	257	296	516	367	384	295	455	354	Tmem86a	14.8335	16.1404	26.8219	20.3835	20.5285	18.2002	25.4352	18.0065	357.92	0.052412	0.166832	0.31416	0.753399	0.869353	NOT
ENSMUSG00000010311	2575	1	1	1	0	0	0	2	0	Optc	0.0422966	0.0399593	0.0380921	0	0	0	0.081931	0	0.579686	1.4073	2.03331	0.692124	0.48886	NA	NOT
ENSMUSG00000010342	5014	5	10	12	5	5	6	12	7	Tex14	0.10861	0.205216	0.234752	0.104513	0.100597	0.139313	0.25246	0.134002	7.49293	0.471778	0.557205	0.846687	0.397169	0.608033	NOT
ENSMUSG00000010358	1727	101	116	138	104	141	92	106	144	Ifi35	6.3696	6.91132	7.83787	6.31139	8.23616	6.20184	6.47454	8.00326	116.931	-0.312903	0.182787	-1.71184	0.0869264	0.227146	NOT
ENSMUSG00000010362	1575	34	35	48	50	44	39	39	53	Rdm1	2.35116	2.28656	2.98932	3.32716	2.81819	2.88277	2.61204	3.22992	42.4779	-0.258178	0.252736	-1.02153	0.307003	0.520376	NOT
ENSMUSG00000010376	1261	325	450	489	529	467	334	491	437	Nedd8	28.0706	36.7192	38.0369	43.9668	37.3594	30.8359	41.0735	33.2631	433.223	0.0531526	0.132989	0.399677	0.689394	0.829441	NOT
ENSMUSG00000010392	4289	637	724	835	753	711	679	692	813	Gosr1	16.1758	17.3691	19.096	18.4002	16.7229	18.4306	17.0194	18.1941	726.576	-0.197027	0.116989	-1.68415	0.0921529	0.23637	NOT
ENSMUSG00000010406	1109	266	395	344	385	356	266	405	367	Mrpl52	26.1236	36.6489	30.4256	36.3843	32.383	27.9239	38.5229	31.7637	342.974	0.0144413	0.135924	0.106245	0.915388	0.959265	NOT
ENSMUSG00000010435	979	0	0	0	0	0	0	0	0	Spaca7	0	0	0	0	0	0	0	0	0	NA	NA	NA	NA	NA	NA
ENSMUSG00000010453	6742	736	850	1060	1085	702	712	1005	902	Kansl3	11.8897	12.9726	15.4216	16.8665	10.5038	12.2947	15.7243	12.8415	866.689	0.109611	0.118667	0.923686	0.35565	0.568996	NOT
ENSMUSG00000010461	9419	6	23	14	13	9	8	30	3	Eya4	0.0693792	0.251257	0.145792	0.144651	0.0963908	0.0988804	0.335979	0.0305713	12.5834	1.31886	0.510283	2.58457	0.00974995	0.0451912	UP
ENSMUSG00000010476	9227	2	4	1	1	0	2	4	2	Ebf3	0.0236076	0.0446062	0.0106304	0.0113586	0	0.0252345	0.0457293	0.0208049	1.96274	0.443002	1.12878	0.392461	0.694718	NA	NOT
ENSMUSG00000010492	2522	15	8	15	10	14	7	9	7	Uckl1os	0.647782	0.326393	0.583388	0.415565	0.559991	0.323131	0.376437	0.26641	10.613	-0.324273	0.495155	-0.654893	0.512537	0.703111	NOT
ENSMUSG00000010505	7191	0	0	0	0	0	0	0	0	Myt1	0	0	0	0	0	0	0	0	0	NA	NA	NA	NA	NA	NA
ENSMUSG00000010517	5093	481	432	481	410	439	465	421	523	Faf1	10.2862	8.72782	9.26367	8.43712	8.69539	10.6293	8.71974	9.85655	458.012	-0.413627	0.123171	-3.35814	0.000784682	0.00617813	NOT
ENSMUSG00000010529	1215	0	0	0	1	0	0	3	0	Gm266	0	0	0	0.0862597	0	0	0.26046	0	0.430086	2.10267	2.7795	0.756492	0.449354	NA	NOT
ENSMUSG00000010538	1112	6	6	4	4	5	2	3	10	Tsacc	0.587665	0.55519	0.352831	0.376998	0.45359	0.209387	0.284585	0.863162	4.98701	-0.678405	0.70051	-0.968444	0.332822	0.545917	NOT
ENSMUSG00000010554	13817	132	190	180	221	99	94	199	116	Mettl16	1.0405	1.41493	1.27782	1.67634	0.722802	0.792026	1.51927	0.805826	149.636	0.561313	0.17716	3.16839	0.00153283	0.0104189	UP
ENSMUSG00000010592	3820	1	2	0	0	0	0	0	0	Dazl	0.0285115	0.0538719	0	0	0	0	0	0	0.384417	0.490569	2.94329	0.166674	0.867627	NA	NOT
ENSMUSG00000010601	3029	841	375	651	427	393	681	586	891	Apol7a	30.2399	12.7388	21.0811	14.7745	13.0885	26.1742	20.4077	28.2342	612.065	-0.761513	0.237441	-3.20716	0.00134051	0.00936465	DOWN
ENSMUSG00000010607	777	102	82	75	110	99	63	115	103	Pigyl	14.2976	10.859	9.46786	14.8373	12.8532	9.43941	15.6125	12.7237	92.7912	-0.216953	0.21375	-1.01498	0.310115	0.522847	NOT
ENSMUSG00000010608	17376	786	794	1060	906	747	658	1166	822	Rbm25	4.9267	4.70182	5.98367	5.46465	4.33679	4.40861	7.07854	4.54066	850.564	0.0919492	0.113825	0.807812	0.419199	0.626737	NOT
ENSMUSG00000010609	4332	1386	1187	1392	1207	1537	1467	1019	1771	Psen2	34.8464	28.1941	31.5183	29.2014	35.7918	39.4246	24.8131	39.2398	1383.88	-0.63436	0.131644	-4.81875	1.44e-06	3.3e-05	DOWN
ENSMUSG00000010651	1962	16605	12305	16085	17582	26683	11991	8919	14047	Acaa1b	921.771	645.324	804.144	939.19	1371.94	711.511	479.526	687.197	15662.9	-0.60005	0.255064	-2.35254	0.0186456	0.0740246	DOWN
ENSMUSG00000010660	3093	10	28	37	22	17	10	43	13	Plcd1	0.35213	0.93148	1.17337	0.745465	0.554456	0.376396	1.46651	0.403423	21.2428	1.09042	0.363562	2.99926	0.00270636	0.0163663	UP
ENSMUSG00000010663	4812	2821	2916	3573	2596	3527	2427	3095	3063	Fads1	63.8499	62.353	72.8315	56.541	73.9397	58.7177	67.8469	61.0968	2980.34	-0.239238	0.121086	-1.97576	0.048182	0.149028	NOT
ENSMUSG00000010721	5850	85	67	104	82	92	101	76	102	Lmbr1	1.58251	1.17846	1.74377	1.46907	1.58646	2.00998	1.37042	1.67356	89.1088	-0.496535	0.198291	-2.50407	0.0122773	0.0539093	NOT
ENSMUSG00000010751	4217	15	36	18	18	7	12	25	12	Tnfrsf22	0.38741	0.878404	0.418678	0.447356	0.167453	0.331286	0.625362	0.273133	17.3913	0.796128	0.428943	1.85602	0.0634502	0.181146	NOT
ENSMUSG00000010755	6583	164	134	262	158	178	150	212	163	Cars	2.71333	2.09448	3.90381	2.51546	2.72769	2.65273	3.39709	2.37662	174.957	-0.0719132	0.190411	-0.377673	0.705673	0.839849	NOT
ENSMUSG00000010760	1121	1	0	5	1	3	0	8	0	Phlda2	0.0971577	0	0.437498	0.0934929	0.269969	0	0.7528	0	2.02845	1.47503	1.40225	1.0519	0.292844	NA	NOT
ENSMUSG00000010796	2829	0	0	3	5	0	0	3	1	Asz1	0	0	0.104016	0.185234	0	0	0.111862	0.0339284	1.34778	2.88495	1.62743	1.77271	0.0762775	NA	NOT
ENSMUSG00000010797	2255	32	70	112	99	76	45	63	56	Wnt2	1.54556	3.19409	4.87173	4.60122	3.39989	2.32322	2.94706	2.38363	67.114	0.45027	0.284367	1.58341	0.113327	0.271976	NOT
ENSMUSG00000010803	7326	0	0	0	0	0	0	0	0	Gabra1	0	0	0	0	0	0	0	0	0	NA	NA	NA	NA	NA	NA
ENSMUSG00000010825	6773	0	0	1	0	0	0	1	1	Grid2ip	0	0	0.0144821	0	0	0	0.0155745	0.0141715	0.334833	0.415724	2.66821	0.155806	0.876186	NA	NOT
ENSMUSG00000010830	1411	3	6	14	16	6	4	28	6	Kdelr3	0.231567	0.437542	0.973224	1.18844	0.428965	0.330034	2.09327	0.408151	9.60378	1.45526	0.583802	2.49272	0.0126769	0.055141	UP
ENSMUSG00000010841	798	2	2	3	6	2	1	2	2	Cfap97d1	0.272967	0.257883	0.368748	0.788012	0.252828	0.145889	0.264376	0.24056	2.42733	0.629921	0.969982	0.649415	0.51607	NA	NOT
ENSMUSG00000010911	1000	106	78	99	92	89	92	78	130	Apip	11.5449	8.02583	9.71062	9.64211	8.97818	10.7106	8.22792	12.4779	95.9348	-0.542008	0.190541	-2.84458	0.00444706	0.0242995	DOWN
ENSMUSG00000010914	3930	287	301	403	326	354	252	316	350	Pdhx	7.95376	7.88078	10.0583	8.69379	9.08675	7.46506	8.48183	8.54815	320.256	-0.161142	0.136517	-1.18039	0.237846	0.44234	NOT
ENSMUSG00000010936	6960	232	295	325	300	294	228	317	304	Vac14	3.63046	4.36122	4.58021	4.51748	4.26124	3.81374	4.80447	4.19239	283.097	-0.0507016	0.12112	-0.418605	0.675505	0.820565	NOT
ENSMUSG00000011008	3288	7	10	14	10	2	8	22	13	Mcoln2	0.231872	0.312942	0.417645	0.318752	0.0613615	0.283259	0.705807	0.379497	10.2706	0.606606	0.544941	1.11316	0.26564	0.474654	NOT
ENSMUSG00000011034	4104	16	29	50	49	19	14	86	15	Slc5a1	0.424615	0.727087	1.19502	1.25133	0.46703	0.397142	2.21048	0.350817	32.3997	1.43787	0.352364	4.08065	4.49e-05	0.000597519	UP
ENSMUSG00000011096	3072	428	710	625	749	653	482	545	689	Akt1s1	15.1742	23.7811	19.9559	25.5532	21.4432	18.2663	18.7142	21.5276	603.642	-0.0341295	0.17544	-0.194537	0.845756	0.923332	NOT
ENSMUSG00000011114	3901	539	1004	871	864	598	544	879	733	Tbrg1	15.0486	26.4822	21.9005	23.2125	15.4641	16.2348	23.7688	18.0354	737.575	0.313936	0.128126	2.45022	0.014277	0.0602423	NOT
ENSMUSG00000011118	3434	0	0	0	0	0	0	0	0	Panx3	0	0	0	0	0	0	0	0	0	NA	NA	NA	NA	NA	NA
ENSMUSG00000011148	2090	199	246	171	151	191	205	162	269	Adssl1	10.3703	12.1111	8.0253	7.57208	9.21903	11.4191	8.17643	12.3539	200.768	-0.509999	0.203331	-2.50822	0.012134	0.0534053	DOWN
ENSMUSG00000011154	3188	0	0	0	0	0	0	0	0	Cfap161	0	0	0	0	0	0	0	0	0	NA	NA	NA	NA	NA	NA
ENSMUSG00000011158	7788	254	275	282	239	335	261	296	304	Brf1	3.55215	3.63331	3.55169	3.2163	4.33927	3.90157	4.00923	3.74666	280.248	-0.36057	0.130061	-2.77232	0.00556588	0.0290837	NOT
ENSMUSG00000011171	4463	0	0	2	0	1	0	2	1	Vipr2	0	0	0.0439556	0	0.0226033	0	0.0472714	0.0215065	0.678718	0.680099	1.98692	0.342288	0.732134	NA	NOT
ENSMUSG00000011179	3405	755	1192	794	845	860	663	998	973	Odc1	24.1498	36.0209	22.8726	26.009	25.4788	22.6684	30.9178	27.4279	875.075	-0.0276628	0.162784	-0.169935	0.865061	0.934253	NOT
ENSMUSG00000011254	3015	33	50	56	55	43	31	64	61	Thg1l	1.19209	1.70639	1.82185	1.91188	1.43873	1.19702	2.23917	1.94196	47.8315	0.152077	0.244131	0.622931	0.53333	0.720034	NOT
ENSMUSG00000011256	7115	35	51	80	46	30	27	78	45	Adam19	0.535767	0.737549	1.10288	0.67759	0.425348	0.441788	1.15642	0.607064	46.9419	0.609627	0.261781	2.32876	0.0198715	0.0777925	UP
ENSMUSG00000011257	4027	605	869	673	712	937	608	733	892	Pabpc4	16.3628	22.2041	16.3925	18.5303	23.4723	17.5771	19.2007	21.2608	750.086	-0.286738	0.162529	-1.76423	0.0776936	0.208754	NOT
ENSMUSG00000011263	4016	152	199	200	200	198	135	194	171	Exoc3l2	4.12224	5.09865	4.88481	5.2194	4.97359	3.9135	5.09569	4.08695	178.804	-0.00109174	0.149987	-0.00727887	0.994192	0.997302	NOT
ENSMUSG00000011267	2037	1	6	6	3	3	4	4	3	Zfp296	0.0534678	0.303079	0.288916	0.154353	0.148569	0.228609	0.20714	0.14136	3.66231	0.504395	0.793876	0.635357	0.525196	0.713397	NOT
ENSMUSG00000011305	2087	1261	3358	1809	1943	2141	1404	1546	1650	Plin5	65.8075	165.559	85.0213	97.5741	103.489	78.3195	78.1416	75.8854	1870.5	0.173924	0.251963	0.690275	0.490022	0.684441	NOT
ENSMUSG00000011306	6109	188	203	244	261	241	175	248	254	Sugp1	3.35174	3.41918	3.9177	4.4777	3.97965	3.33498	4.2823	3.9908	223.939	-0.117931	0.142273	-0.828907	0.407157	0.616557	NOT
ENSMUSG00000011349	1619	0	0	0	0	0	0	0	0	Dmrtc2	0	0	0	0	0	0	0	0	0	NA	NA	NA	NA	NA	NA
ENSMUSG00000011350	2087	0	1	0	0	1	0	0	0	Gm5893	0	0.049303	0	0	0.0483365	0	0	0	0.25274	-0.28377	3.31594	-0.0855775	0.931802	NA	NOT
ENSMUSG00000011382	7408	1872	943	1596	1349	1498	1743	1365	2046	Dhdh	27.5225	13.098	21.1321	19.0851	20.399	27.3919	19.4369	26.5095	1569.17	-0.740138	0.156451	-4.73078	2.24e-06	4.71e-05	DOWN
ENSMUSG00000011427	3658	101	117	94	124	101	86	136	141	Zfp790	3.00719	3.29107	2.52055	3.55273	2.78532	2.73703	3.92185	3.69975	111.22	-0.135485	0.189574	-0.714682	0.474806	0.673097	NOT
ENSMUSG00000011463	3284	2	1	2	0	0	0	2	967	Cpb1	0.06633	0.0313323	0.0597363	0	0	0	0.0642424	28.2631	119.428	-7.76357	2.78272	-2.78992	NA	NA	NA
ENSMUSG00000011486	1331	0	0	0	0	0	0	0	1	Slc25a41	0	0	0	0	0	0	0	0.0721139	0.122645	-1.0051	3.53381	-0.284424	0.776085	NA	NOT
ENSMUSG00000011589	2493	2	3	2	3	2	4	1	2	Fsd1	0.0873757	0.123821	0.07869	0.12612	0.0809293	0.186794	0.0423129	0.0770025	2.44255	-0.437403	0.955581	-0.457735	0.647143	NA	NOT
ENSMUSG00000011632	843	0	0	0	0	0	0	0	1	Pinlyp	0	0	0	0	0	0	0	0.11386	0.122645	-1.0051	3.53381	-0.284424	0.776085	NA	NOT
ENSMUSG00000011658	5003	47	43	56	54	62	52	40	68	Fuz	1.02318	0.884369	1.09792	1.13122	1.25014	1.21004	0.843383	1.30459	52.9375	-0.520847	0.233479	-2.23081	0.0256936	0.09385	DOWN
ENSMUSG00000011751	9563	0	2	2	1	0	0	1	1	Sptbn4	0	0.0215195	0.0205139	0.0109595	0	0	0.0110306	0.010037	0.802695	2.02892	1.71188	1.1852	0.235937	NA	NOT
ENSMUSG00000011752	1982	1306	1997	1919	1827	1352	1184	1922	1405	Pgam1	71.7666	103.674	94.9692	96.6093	68.8131	69.5462	102.293	68.0408	1581.9	0.268192	0.0990809	2.7068	0.00679359	0.0340501	NOT
ENSMUSG00000011831	8060	1994	1256	2334	1723	1599	1905	2025	2011	Evi5	26.9447	16.0343	28.4039	22.4045	20.013	27.516	26.5024	23.9483	1850.75	-0.336112	0.168471	-1.99508	0.0460346	0.144239	NOT
ENSMUSG00000011832	8524	91	98	81	98	82	81	95	104	Evi5l	1.16274	1.18298	0.93208	1.20494	0.97044	1.10628	1.17564	1.17108	90.9563	-0.220826	0.186838	-1.18192	0.237239	0.441649	NOT
ENSMUSG00000011837	1769	117	133	144	157	105	97	151	137	Snapc2	7.20346	7.73605	7.98447	9.30157	5.98769	6.38365	9.00418	7.43344	128.005	0.0821183	0.160848	0.510533	0.609678	0.77614	NOT
ENSMUSG00000011877	4838	158	332	330	291	236	175	403	263	Git1	3.55692	7.06102	6.69052	6.30393	4.9209	4.21112	8.78687	5.21779	264.693	0.430969	0.155286	2.77531	0.00551484	0.0288617	NOT
ENSMUSG00000011884	1762	72	135	166	151	97	58	195	80	Gltp	4.45051	7.88358	9.24089	8.98163	5.55346	3.83219	11.6741	4.35794	114.076	0.793155	0.180013	4.4061	1.05e-05	0.000177414	UP
ENSMUSG00000011958	3455	477	442	516	446	431	401	598	463	Bnip2	15.0367	13.1634	14.6492	13.5292	12.5842	13.5121	18.2578	12.8626	466.888	-0.1148	0.120578	-0.952074	0.341059	0.554477	NOT
ENSMUSG00000011960	9157	508	471	515	537	469	428	606	495	Ccnt1	6.04218	5.29253	5.51653	6.14618	5.16675	5.44146	6.98095	5.18858	499.312	-0.12256	0.115602	-1.06019	0.289059	0.500736	NOT
ENSMUSG00000012017	3839	65	163	163	207	130	64	247	96	Scarf2	1.84407	4.36883	4.16467	5.65115	3.41604	1.94083	6.78694	2.40021	135.379	0.863397	0.225221	3.83356	0.000126304	0.00140907	UP
ENSMUSG00000012042	2379	2	11	9	21	3	6	5	5	4930579F01Rik	0.0915627	0.475766	0.371073	0.925144	0.127211	0.293618	0.221703	0.201731	7.50865	1.26076	0.670038	1.88163	0.0598863	0.173704	NOT
ENSMUSG00000012076	3455	46	45	68	65	40	50	53	40	Brms1l	1.45008	1.34017	1.93051	1.97174	1.16791	1.6848	1.61817	1.11124	50.3447	0.0981865	0.251678	0.390127	0.696443	0.834094	NOT
ENSMUSG00000012114	11642	543	572	808	716	641	512	755	683	Med15	5.0799	5.0555	6.80762	6.44569	5.55429	5.11997	6.84092	5.63106	643.343	-0.0200462	0.114714	-0.174749	0.861277	0.932209	NOT
ENSMUSG00000012117	3784	300	326	289	331	283	291	301	285	Dhdds	8.63482	8.86466	7.49132	9.16772	7.54455	8.95297	8.39094	7.22921	300.491	-0.177472	0.148408	-1.19584	0.231759	0.435136	NOT
ENSMUSG00000012123	7801	10	17	11	13	25	11	20	17	Crybg2	0.139615	0.22423	0.13831	0.174654	0.323287	0.16416	0.270443	0.209168	15.3448	-0.315238	0.424245	-0.743055	0.457448	0.659415	NOT
ENSMUSG00000012126	4742	4	6	4	9	1	2	12	3	Ubxn11	0.0918716	0.130192	0.082739	0.198914	0.0212734	0.0491014	0.266941	0.0607235	4.84272	1.34212	0.754898	1.77789	0.0754226	0.204537	NOT
ENSMUSG00000012187	1558	4	9	18	12	11	6	8	7	Mogat1	0.279625	0.594389	1.13323	0.807231	0.712235	0.448342	0.541649	0.431248	9.07563	0.471381	0.53595	0.879524	0.379117	0.591137	NOT
ENSMUSG00000012211	1270	0	0	0	2	0	0	1	0	Tex22	0	0	0	0.165048	0	0	0.0830599	0	0.339552	1.7506	2.99455	0.584595	0.55882	NA	NOT
ENSMUSG00000012282	1746	0	0	0	1	0	0	0	0	Wnt8a	0	0	0	0.0600261	0	0	0	0	0.117714	0.43757	3.53381	0.123824	0.901455	NA	NOT
ENSMUSG00000012296	4701	90	130	131	138	131	94	157	92	Tjap1	2.08514	2.84543	2.73333	3.07661	2.81112	2.32789	3.52294	1.87843	118.227	0.165747	0.181018	0.91564	0.359856	0.5725	NOT
ENSMUSG00000012350	5576	16	16	73	53	26	8	137	12	Ehf	0.312522	0.295252	1.28414	0.996179	0.47038	0.167029	2.59175	0.206564	38.7277	1.85248	0.503774	3.6772	0.000235805	0.00236605	UP
ENSMUSG00000012396	2242	0	0	0	0	0	0	0	0	Nanog	0	0	0	0	0	0	0	0	0	NA	NA	NA	NA	NA	NA
ENSMUSG00000012405	2473	1091	1855	1657	2157	1668	1010	1821	1610	Rpl15	48.0489	77.1819	65.7219	91.4135	68.0409	47.5469	77.675	62.4883	1574.23	0.219727	0.162205	1.35463	0.175536	0.363891	NOT
ENSMUSG00000012422	10807	557	629	742	712	625	449	701	506	Tmem167	5.61349	5.98882	6.73458	6.90493	5.83409	4.83689	6.84239	4.4941	605.544	0.0988172	0.127213	0.776783	0.437287	0.642495	NOT
ENSMUSG00000012428	3155	617	1309	1339	961	594	618	1480	702	Steap4	21.2995	42.6909	41.6287	31.9233	18.9926	22.8042	49.4832	21.3567	917.171	0.718399	0.135821	5.28932	1.23e-07	4.06e-06	UP
ENSMUSG00000012429	4503	118	118	144	167	105	117	134	141	Mplkip	2.85406	2.69635	3.13669	3.88686	2.35226	3.02489	3.13905	3.00548	129.292	-0.0531858	0.179269	-0.296682	0.766709	0.876886	NOT
ENSMUSG00000012443	7461	24	108	108	61	37	17	127	28	Kif11	0.350346	1.48944	1.41984	0.856874	0.500268	0.265263	1.79557	0.360212	59.4745	1.65072	0.28406	5.81116	6.2e-09	3.16e-07	UP
ENSMUSG00000012483	1136	34	32	53	34	34	36	46	39	Rpa3	3.25974	2.89846	4.57624	3.13679	3.01925	3.68935	4.27144	3.29521	38.007	-0.0856595	0.262039	-0.326896	0.743747	0.863989	NOT
ENSMUSG00000012519	2303	71	105	174	162	92	61	187	60	Mlkl	3.35774	4.69127	7.41083	7.37234	4.02988	3.08362	8.56531	2.50066	108.977	0.850802	0.21603	3.93835	8.2e-05	0.00098366	UP
ENSMUSG00000012520	3645	0	0	0	0	0	0	0	0	Phox2b	0	0	0	0	0	0	0	0	0	NA	NA	NA	NA	NA	NA
ENSMUSG00000012535	13100	604	548	597	548	539	545	664	641	Tnpo3	5.02168	4.30432	4.47007	4.38423	4.15064	4.8434	5.34678	4.6966	583.538	-0.269593	0.10876	-2.47879	0.013183	0.056777	NOT
ENSMUSG00000012609	15875	115	63	89	81	109	81	100	95	Ttll5	0.788982	0.40834	0.549905	0.534756	0.692645	0.594014	0.664479	0.57439	91.9719	-0.555043	0.196164	-2.82948	0.00466237	0.0252226	DOWN
ENSMUSG00000012640	5119	200	248	262	229	182	183	285	203	Zfp715	4.25528	4.98496	5.02028	4.68851	3.58661	4.1619	5.87293	3.80634	220.325	0.128042	0.133191	0.961347	0.336378	0.549343	NOT
ENSMUSG00000012705	1579	0	0	0	0	0	0	0	0	Retn	0	0	0	0	0	0	0	0	0	NA	NA	NA	NA	NA	NA
ENSMUSG00000012777	1749	1	0	0	0	0	0	1	0	Acp4	0.0622721	0	0	0	0	0	0.0603122	0	0.246456	-0.28377	3.34438	-0.0848497	0.932381	NA	NOT
ENSMUSG00000012819	16939	2	3	0	3	1	2	3	0	Cdh23	0.0128595	0.0182234	0	0.0185617	0.00595539	0.0137457	0.0186822	0	1.75134	0.538656	1.24209	0.433669	0.664529	NA	NOT
ENSMUSG00000012848	1734	1905	2995	2387	3110	2505	1894	2783	2199	Rps5	119.654	177.723	135.025	187.973	145.733	127.162	169.301	121.723	2437.18	0.136624	0.143114	0.954654	0.339753	0.552961	NOT
ENSMUSG00000012889	3549	7	1	3	3	6	5	5	3	Podnl1	0.21482	0.0289928	0.0829138	0.088593	0.170547	0.164017	0.148614	0.0811357	4.23929	-1.12012	0.763402	-1.46728	0.1423	0.316541	NOT
ENSMUSG00000013033	8587	85	145	155	143	134	99	228	97	Adgrl1	1.0781	1.73749	1.77052	1.74534	1.57421	1.34221	2.80084	1.08424	131.681	0.400804	0.199558	2.00846	0.0445949	0.14059	NOT
ENSMUSG00000013076	10064	222	278	333	268	315	195	437	217	Amotl1	2.40251	2.8423	3.24553	2.79093	3.15746	2.25574	4.58043	2.0696	276.249	0.180029	0.180406	0.997913	0.318321	0.531124	NOT
ENSMUSG00000013083	616	0	0	1	0	0	0	0	0	2200002J24Rik	0	0	0.159232	0	0	0	0	0	0.108064	0.43757	3.53381	0.123824	0.901455	NA	NOT
ENSMUSG00000013089	4103	52	64	121	108	53	32	187	53	Etv5	1.38034	1.605	2.89265	2.75871	1.30308	0.907975	4.80768	1.23986	78.7896	1.04033	0.281251	3.69895	0.000216491	0.00219975	UP
ENSMUSG00000013091	871	1	1	1	3	1	1	3	1	Tmem190	0.125045	0.118135	0.112614	0.360984	0.115819	0.133662	0.363328	0.110199	1.44446	0.710725	1.22833	0.578613	0.56285	NA	NOT
ENSMUSG00000013150	4608	88	97	123	129	138	105	77	141	Gfod2	2.07995	2.16598	2.61821	2.93401	3.0211	2.65279	1.76268	2.937	112.311	-0.413287	0.222367	-1.85858	0.0630865	0.180337	NOT
ENSMUSG00000013155	3659	4	4	14	11	6	9	13	2	Enkd1	0.119064	0.112485	0.375299	0.315075	0.16542	0.286355	0.37478	0.0524644	7.62886	0.670556	0.629512	1.0652	0.286785	0.498488	NOT
ENSMUSG00000013158	1487	0	0	2	3	4	0	2	2	4933405L10Rik	0	0	0.131926	0.211444	0.271361	0	0.141878	0.129097	1.5496	-0.0169529	1.3821	-0.012266	0.990213	NA	NOT
ENSMUSG00000013160	1793	749	730	1058	901	761	749	871	997	Atp6v0d1	45.4972	41.8927	57.8785	52.6658	42.8156	48.6325	51.2428	53.3718	843.275	-0.15202	0.128196	-1.18584	0.235685	0.43968	NOT
ENSMUSG00000013236	14990	143	121	206	147	155	131	271	147	Ptprs	1.039	0.830576	1.34796	1.02778	1.04311	1.01741	1.90705	0.941266	161.29	0.0673696	0.208509	0.323102	0.746618	0.865475	NOT
ENSMUSG00000013275	4912	73	141	118	122	80	73	144	79	Slc41a1	1.61863	2.95363	2.35633	2.60307	1.64297	1.73017	3.09243	1.54371	100.97	0.50231	0.178031	2.82148	0.00478022	0.0256952	UP
ENSMUSG00000013338	6896	0	0	0	0	0	0	0	0	Fer1l4	0	0	0	0	0	0	0	0	0	NA	NA	NA	NA	NA	NA
ENSMUSG00000013353	5633	0	0	0	0	0	0	1	0	4931406B18Rik	0	0	0	0	0	0	0.0187265	0	0.104124	0.43757	3.53381	0.123824	0.901455	NA	NOT
ENSMUSG00000013367	2622	2	4	5	2	3	1	2	2	Iglon5	0.0830769	0.156972	0.187046	0.0799432	0.115421	0.044401	0.0804623	0.073214	2.54638	0.431634	0.933293	0.462485	0.643733	NA	NOT
ENSMUSG00000013415	9682	1	0	2	1	0	0	1	0	Igf2bp1	0.0112491	0	0.0202617	0.0108248	0	0	0.0108951	0	0.580298	1.40929	2.03306	0.693186	0.488193	NA	NOT
ENSMUSG00000013418	1722	2	1	4	2	0	2	6	5	B4galnt2	0.126497	0.0597534	0.227844	0.121725	0	0.135214	0.367547	0.278698	2.6177	0.235857	1.01242	0.232965	0.815789	NA	NOT
ENSMUSG00000013419	7063	24	60	40	45	31	18	100	25	Zfp651	0.370088	0.874093	0.555498	0.66774	0.442762	0.296694	1.4935	0.339741	40.6164	1.03442	0.32874	3.14663	0.00165165	0.0110512	UP
ENSMUSG00000013465	3432	231	321	320	328	266	216	325	234	Nelfb	7.33074	9.62395	9.14564	10.0164	7.81866	7.32709	9.98921	6.54433	275.579	0.169749	0.130181	1.30395	0.192251	0.38645	NOT
ENSMUSG00000013483	4605	5	9	5	5	10	10	6	8	Card14	0.118256	0.201098	0.106501	0.113795	0.219063	0.252811	0.137441	0.166747	7.38451	-0.679468	0.570178	-1.19168	0.233388	0.436941	NOT
ENSMUSG00000013495	5928	128	98	125	118	101	110	136	143	Tmem175	2.35172	1.70104	2.0683	2.08621	1.71874	2.16028	2.42006	2.31539	119.328	-0.301023	0.171951	-1.75063	0.0800093	0.213506	NOT
ENSMUSG00000013523	3775	0	1	1	0	0	1	2	2	Bcas1	0	0.027257	0.0259833	0	0	0.0308396	0.0558867	0.0508522	0.835813	0.132833	1.71352	0.0775202	0.93821	NA	NOT
ENSMUSG00000013539	7910	629	869	794	621	756	653	708	778	Tango2	8.66078	11.3042	9.8459	8.2281	9.64147	9.61085	9.44174	9.44061	722.337	-0.187379	0.141129	-1.32772	0.18427	0.376469	NOT
ENSMUSG00000013562	1373	0	0	0	0	0	0	2	1	NA	0	0	0	0	0	0	0.153658	0.0699079	0.330893	0.399263	3.07562	0.129816	0.896712	NA	NOT
ENSMUSG00000013584	2264	1	3	2	4	3	3	6	3	Aldh1a2	0.0481068	0.136345	0.0866493	0.185169	0.133673	0.154266	0.279557	0.127187	3.03972	0.298928	0.858266	0.348293	0.72762	0.853252	NOT
ENSMUSG00000013593	2313	1898	2131	2443	2117	2227	1882	2330	2127	Ndufs2	89.3724	94.7989	103.6	95.9245	97.1276	94.726	106.261	88.265	2126.32	-0.13406	0.0885915	-1.51324	0.13022	0.29967	NOT
ENSMUSG00000013611	2935	0	0	1	0	0	0	0	1	Snx31	0	0	0.0334198	0	0	0	0	0.0327031	0.230709	-0.283769	3.42151	-0.0829368	0.933902	NA	NOT
ENSMUSG00000013622	2082	648	677	836	667	766	716	687	885	Atraid	33.8983	33.4583	39.3856	33.576	37.1147	40.0366	34.8074	40.7999	733.658	-0.351894	0.118779	-2.96259	0.00305066	0.0179619	NOT
ENSMUSG00000013629	8183	99	119	171	144	128	87	160	115	Cad	1.31767	1.49634	2.04972	1.84431	1.57796	1.23775	2.06254	1.34891	124.872	0.187452	0.166996	1.12249	0.261653	0.470248	NOT
ENSMUSG00000013643	1284	0	0	0	0	0	0	0	0	Lypd8	0	0	0	0	0	0	0	0	0	NA	NA	NA	NA	NA	NA
ENSMUSG00000013646	6352	195	203	284	262	359	188	218	236	Sh3bp5l	3.34354	3.28837	4.3855	4.3229	5.70141	3.44566	3.62027	3.56614	241.576	-0.288422	0.204603	-1.40966	0.158639	0.340487	NOT
ENSMUSG00000013653	926	0	0	0	0	0	0	0	0	1810065E05Rik	0	0	0	0	0	0	0	0	0	NA	NA	NA	NA	NA	NA
ENSMUSG00000013662	5995	590	754	762	701	536	629	871	729	Atad1	10.7188	12.9413	12.4674	12.255	9.01932	12.2148	15.3258	11.6717	687.138	0.0279067	0.125686	0.222034	0.824287	0.911268	NOT
ENSMUSG00000013663	11507	1668	1205	1641	1382	1219	1296	1613	1596	Pten	15.7876	10.7751	13.9881	12.5872	10.6866	13.112	14.7866	13.3127	1446.02	-0.276549	0.13712	-2.01684	0.0437118	0.138341	NOT
ENSMUSG00000013668	1826	0	0	0	0	0	0	0	0	4933402N03Rik	0	0	0	0	0	0	0	0	0	NA	NA	NA	NA	NA	NA
ENSMUSG00000013698	3861	194	239	408	400	229	169	510	245	Pea15a	5.47249	6.36933	10.3651	10.8579	5.9832	5.0958	13.9337	6.09064	286.913	0.607327	0.187084	3.24627	0.00116926	0.00845933	UP
ENSMUSG00000013701	1786	467	1085	571	760	634	427	647	666	Timm23	28.4786	62.5092	31.3593	44.5981	35.8101	27.8337	38.2136	35.7923	646.917	0.234954	0.221646	1.06004	0.289126	0.50075	NOT
ENSMUSG00000013707	1122	23	57	50	68	33	22	54	39	Tnfaip8l2	2.23264	5.2273	4.37108	6.35185	2.96701	2.28273	5.07687	3.33633	41.7024	0.705883	0.26909	2.62323	0.00871014	0.0414305	UP
ENSMUSG00000013736	4413	209	279	262	271	189	179	334	236	Trnt1	5.15817	6.50528	5.82343	6.43605	4.32042	4.7222	7.98377	5.13304	239.761	0.214072	0.136648	1.56659	0.117209	0.278981	NOT
ENSMUSG00000013766	1273	2	1	5	0	1	1	5	4	Ly6g6e	0.171114	0.080829	0.385259	0	0.0792446	0.0914528	0.414321	0.301598	2.24209	0.161495	1.10613	0.146	0.883922	NA	NOT
ENSMUSG00000013787	5489	826	812	900	841	1071	771	860	869	Ehmt2	16.3897	15.2215	16.0828	16.0578	19.6831	16.3526	16.5272	15.1958	867.375	-0.33162	0.118088	-2.80825	0.00498111	0.026569	NOT
ENSMUSG00000013822	1702	241	302	354	373	286	255	321	295	Elof1	15.422	18.2576	20.4012	22.9685	16.9514	17.4424	19.8949	16.6364	299.347	0.0471374	0.133348	0.353492	0.72372	0.850688	NOT
ENSMUSG00000013833	4663	314	409	339	318	430	355	371	424	Med16	7.33411	9.02513	7.13092	7.14736	9.30253	8.86315	8.39274	8.72765	369.902	-0.357864	0.145766	-2.45506	0.014086	0.0596751	NOT
ENSMUSG00000013846	6851	1332	1425	1776	1342	1690	1118	1776	1459	St3gal1	21.1755	21.4021	25.4273	20.5297	24.8846	18.9982	27.3454	20.4408	1469.64	-0.108106	0.121923	-0.886679	0.375252	0.58752	NOT
ENSMUSG00000013858	4663	1264	1776	1499	1935	2004	1255	1615	1335	Tmem259	29.5233	39.1898	31.5317	43.491	43.3541	31.3331	36.5344	27.4797	1572.69	-0.049593	0.17681	-0.280488	0.779103	0.883864	NOT
ENSMUSG00000013878	6237	176	129	138	158	128	150	166	158	Rnf170	3.07341	2.12819	2.17028	2.65501	2.0703	2.79989	2.80755	2.43152	150.672	-0.340892	0.175437	-1.9431	0.0520045	0.157216	NOT
ENSMUSG00000013921	3935	9	12	35	23	10	16	55	16	Clip3	0.249104	0.313785	0.872439	0.612586	0.256362	0.47337	1.47439	0.390276	20.68	0.974469	0.454857	2.14236	0.0321644	0.110901	UP
ENSMUSG00000013928	2432	0	0	2	0	0	0	0	1	LOC108167416	0	0	0.0806637	0	0	0	0	0.0394669	0.338773	0.429099	3.05257	0.14057	0.88821	NA	NOT
ENSMUSG00000013936	1950	0	0	0	0	0	0	0	0	Myl2	0	0	0	0	0	0	0	0	0	NA	NA	NA	NA	NA	NA
ENSMUSG00000013973	5861	64	75	81	67	52	64	68	69	Dedd	1.1893	1.31669	1.35558	1.19808	0.895014	1.27126	1.22386	1.12999	67.0215	-0.0592883	0.210838	-0.281203	0.778555	0.883558	NOT
ENSMUSG00000013974	1494	1	8	6	3	6	4	7	0	Mcemp1	0.0729008	0.550979	0.393924	0.210453	0.405134	0.311698	0.494245	0	4.24393	0.821832	0.856747	0.959247	0.337434	0.550429	NOT
ENSMUSG00000013997	4932	755	742	815	766	964	867	750	1083	Nit1	16.6727	15.4802	16.2086	16.2776	19.7175	20.4654	16.0411	21.0767	846.188	-0.531242	0.115376	-4.60446	4.14e-06	7.99e-05	DOWN
ENSMUSG00000014030	8853	33	19	16	12	8	12	33	23	Pax5	0.405982	0.22083	0.177272	0.142061	0.0911586	0.157803	0.393205	0.249364	19.2869	-0.224733	0.475876	-0.472251	0.636747	0.79387	NOT
ENSMUSG00000014039	11349	67	103	120	112	77	70	118	81	Prdm15	0.642984	0.933846	1.03713	1.0343	0.684433	0.718068	1.09678	0.685053	91.2387	0.336635	0.172166	1.95529	0.0505485	0.153947	NOT
ENSMUSG00000014074	4462	189	183	226	185	166	160	258	181	Rnf168	4.61334	4.22004	4.9681	4.34537	3.75298	4.17461	6.09938	3.89355	190.683	-0.0004136	0.148432	-0.00278646	0.997777	0.998784	NOT
ENSMUSG00000014075	2385	14	19	21	11	8	19	25	18	Tctex1d2	0.639326	0.819711	0.863659	0.48338	0.338376	0.92745	1.10572	0.724404	16.6312	0.0643443	0.417883	0.153977	0.877628	0.940627	NOT
ENSMUSG00000014077	3499	5405	6377	6347	6403	6294	5412	5912	6298	Chp1	168.242	187.529	177.925	191.789	181.46	180.069	178.232	172.765	6026.66	-0.178663	0.104124	-1.71586	0.0861884	0.225532	NOT
ENSMUSG00000014104	1208	0	0	0	0	0	0	0	0	Sval2	0	0	0	0	0	0	0	0	0	NA	NA	NA	NA	NA	NA
ENSMUSG00000014158	4076	6	17	21	14	9	11	43	11	Trpv4	0.160325	0.429151	0.505355	0.35998	0.222744	0.314184	1.11283	0.259033	15.5256	1.05334	0.463584	2.27218	0.0230759	0.0865726	UP
ENSMUSG00000014164	7322	197	178	207	169	231	220	235	226	Klhl3	2.93035	2.50142	2.77301	2.41903	3.18259	3.49799	3.38558	2.96262	208.154	-0.438362	0.142115	-3.08456	0.00203853	0.013061	NOT
ENSMUSG00000014177	2235	177	156	212	213	165	174	197	194	Tvp23b	8.62539	7.18195	9.304	9.98818	7.4474	9.06352	9.29788	8.33146	184.745	-0.154434	0.152883	-1.01015	0.312425	0.524661	NOT
ENSMUSG00000014195	4863	342	477	431	446	451	366	523	496	Dnajc7	7.65958	10.0928	8.6933	9.61202	9.35557	8.76198	11.3447	9.78981	436.235	-0.0919768	0.127811	-0.719632	0.471752	0.67046	NOT
ENSMUSG00000014198	3101	0	0	0	0	0	0	0	0	Zfp385c	0	0	0	0	0	0	0	0	0	NA	NA	NA	NA	NA	NA
ENSMUSG00000014226	2390	201	186	323	287	204	187	301	218	Cacybp	9.1597	8.00775	13.2561	12.5854	8.61054	9.10896	13.2851	8.75499	233.398	0.146506	0.163132	0.898084	0.369141	0.581987	NOT
ENSMUSG00000014232	2279	37	51	36	48	65	46	47	50	Cluap1	1.76824	2.30262	1.54942	2.2074	2.87718	2.34984	2.17545	2.10583	47.6123	-0.394452	0.25955	-1.51975	0.128573	0.29702	NOT
ENSMUSG00000014243	732	65	89	107	96	80	84	107	115	Zswim7	9.67131	12.5105	14.3379	13.745	11.025	13.3596	15.4194	15.0794	91.5352	-0.0638448	0.192355	-0.331912	0.739956	0.861564	NOT
ENSMUSG00000014245	2268	73	116	99	113	72	85	107	82	Pigl	3.5056	5.26272	4.28158	5.22179	3.20249	4.36316	4.97664	3.47031	92.131	0.19714	0.193523	1.01869	0.308352	0.5214	NOT
ENSMUSG00000014294	572	337	738	410	722	810	328	418	434	Ndufa2	64.1678	132.757	70.3071	132.29	142.852	66.758	77.086	72.8267	520.257	0.0214401	0.297323	0.0721104	0.942514	0.972118	NOT
ENSMUSG00000014301	2435	163	213	275	205	186	159	257	232	Pam16	7.29074	9.0007	11.0776	8.82346	7.7057	7.60192	11.1334	9.14505	206.894	0.0811389	0.142581	0.569074	0.569306	0.746599	NOT
ENSMUSG00000014303	4373	34	49	75	82	38	24	165	42	Glis2	0.846803	1.15295	1.68226	1.96525	0.876602	0.638935	3.98015	0.921864	59.5398	1.12999	0.326037	3.46583	0.000528588	0.00450931	UP
ENSMUSG00000014313	3567	1170	1560	1833	1522	1429	1271	1614	1769	Cox6c	35.7245	45.0005	50.4047	44.7194	40.4136	41.4828	47.7305	47.6016	1500.49	-0.0624061	0.115765	-0.539077	0.589834	0.762311	NOT
ENSMUSG00000014329	7441	85	200	433	347	85	82	839	92	Bicc1	1.24414	2.76563	5.70779	4.88745	1.15235	1.28294	11.8939	1.18673	246.343	2.08102	0.304513	6.83395	8.26e-12	9.74e-10	UP
ENSMUSG00000014349	3997	598	697	690	704	706	569	761	663	Ube2z	16.2948	17.943	16.9327	18.4596	17.8184	16.5731	20.0838	15.9212	667.6	-0.110607	0.10322	-1.07157	0.283915	0.495491	NOT
ENSMUSG00000014351	687	0	0	0	0	0	0	0	0	Gip	0	0	0	0	0	0	0	0	0	NA	NA	NA	NA	NA	NA
ENSMUSG00000014353	8395	704	937	675	651	693	665	739	825	Tmem87b	9.13345	11.4846	7.88669	8.12727	8.32742	9.22202	9.28579	9.43257	734.448	-0.215361	0.156647	-1.37482	0.169188	0.355366	NOT
ENSMUSG00000014355	16714	702	565	804	642	618	669	754	790	Anapc1	4.57446	3.47827	4.71832	4.02568	3.72998	4.65984	4.75868	4.53674	690.021	-0.298227	0.125899	-2.36878	0.0178466	0.0714755	NOT
ENSMUSG00000014361	4336	485	717	701	591	613	472	950	561	Mertk	12.1825	17.0147	15.8577	14.2851	14.2616	12.673	23.1116	12.4185	621.889	0.186965	0.139786	1.33751	0.181056	0.37149	NOT
ENSMUSG00000014402	2730	403	394	531	448	403	390	498	448	Tsg101	16.0778	14.8501	19.0785	17.1989	14.8916	16.6313	19.2425	15.7511	434.777	-0.101136	0.114199	-0.88561	0.375828	0.587714	NOT
ENSMUSG00000014418	6497	216	181	248	188	244	226	230	270	Hps5	3.62096	2.86656	3.74413	3.0327	3.78857	4.04968	3.73431	3.98885	225.396	-0.460736	0.134622	-3.42244	0.000620616	0.00513081	NOT
ENSMUSG00000014426	10181	239	207	216	173	240	248	251	272	Map3k4	2.55676	2.09207	2.08101	1.7809	2.37804	2.83587	2.60063	2.56434	231.868	-0.5272	0.140732	-3.74613	0.000179583	0.00188986	DOWN
ENSMUSG00000014444	9935	100	236	243	192	152	117	304	148	Piezo1	1.09626	2.44422	2.39911	2.02543	1.54338	1.37102	3.22776	1.42985	179.404	0.632835	0.170435	3.71307	0.000204763	0.00210726	UP
ENSMUSG00000014453	2698	20	15	11	20	15	11	19	19	Blk	0.807367	0.572064	0.39991	0.776913	0.560851	0.474653	0.74286	0.675941	16.1742	-0.274016	0.394797	-0.694068	0.48764	0.682623	NOT
ENSMUSG00000014470	1985	138	238	170	181	216	129	244	150	Rnf166	7.57184	12.3371	8.4004	9.55658	10.9772	7.56579	12.9666	7.25317	180.136	0.12129	0.200575	0.604711	0.545371	0.727723	NOT
ENSMUSG00000014496	12233	800	767	697	537	679	714	737	929	Ankrd28	7.12262	6.45146	5.58871	4.60072	5.59931	6.79502	6.35521	7.2892	734.701	-0.469502	0.146415	-3.20665	0.0013429	0.00936971	NOT
ENSMUSG00000014498	8401	597	793	809	794	756	510	796	701	Ankrd52	7.73974	9.71265	9.44559	9.90544	9.07797	7.06748	9.99487	8.0091	708.384	0.0441346	0.11719	0.376608	0.706465	0.840488	NOT
ENSMUSG00000014503	5804	56	55	75	53	58	56	55	74	Pkd2l2	1.05086	0.975059	1.26749	0.957046	1.00809	1.12327	0.99961	1.22377	59.9901	-0.316069	0.216267	-1.46147	0.143885	0.318638	NOT
ENSMUSG00000014504	3630	167	182	253	254	169	151	269	208	Srp19	5.01064	5.15894	6.83637	7.3335	4.69654	4.84279	7.81701	5.49988	201.944	0.180553	0.148365	1.21696	0.223621	0.425749	NOT
ENSMUSG00000014529	2345	0	0	0	0	0	0	0	0	Tmbim7	0	0	0	0	0	0	0	0	0	NA	NA	NA	NA	NA	NA
ENSMUSG00000014542	2471	1732	2599	3032	2822	2159	1615	3463	2307	Clec4f	76.3411	108.225	120.356	119.693	88.141	76.0896	147.834	89.6131	2396.17	0.330935	0.100835	3.28194	0.00103094	0.00766251	NOT
ENSMUSG00000014543	1192	0	1	3	2	0	1	3	1	Klra17	0	0.0863216	0.246863	0.175848	0	0.0976673	0.265485	0.0805231	1.26885	1.87546	1.47182	1.27425	0.202574	NA	NOT
ENSMUSG00000014547	9185	350	364	363	323	304	299	397	346	Wdfy2	4.15023	4.07772	3.87649	3.6856	3.33882	3.78981	4.55939	3.61571	340.731	-0.12985	0.125931	-1.03112	0.302487	0.515052	NOT
ENSMUSG00000014550	8783	170	255	266	273	196	155	297	227	Rbsn	2.10809	2.9874	2.97064	3.25765	2.25119	2.05454	3.56705	2.48073	224.262	0.269347	0.130419	2.06524	0.0389007	0.127162	NOT
ENSMUSG00000014551	6576	57	63	69	74	71	37	74	61	Mrps25	0.944052	0.985767	1.0292	1.17938	1.08917	0.655036	1.18704	0.890359	62.1102	0.0360224	0.220457	0.163399	0.870205	0.937191	NOT
ENSMUSG00000014554	4611	114	142	154	108	160	125	148	144	Dguok	2.69273	3.16876	3.27595	2.45478	3.50044	3.15602	3.3858	2.99753	136.058	-0.258259	0.169844	-1.52057	0.128368	0.29671	NOT
ENSMUSG00000014592	14570	46	53	55	58	46	35	64	55	Camta1	0.34386	0.374293	0.370267	0.417208	0.31849	0.279662	0.463357	0.362326	50.5619	0.0610801	0.222537	0.274471	0.783722	0.887015	NOT
ENSMUSG00000014599	5281	142	254	226	202	177	123	253	125	Csf1	2.92857	4.94895	4.19763	4.00885	3.38108	2.71153	5.05359	2.27191	182.981	0.43899	0.171768	2.55572	0.0105968	0.0481354	NOT
ENSMUSG00000014601	5453	192	170	224	189	184	162	224	208	Strip1	3.83485	3.20781	4.02925	3.63254	3.40393	3.45864	4.33319	3.66121	192.239	-0.171783	0.136035	-1.26279	0.206665	0.405512	NOT
ENSMUSG00000014602	9330	6	3	25	11	8	2	23	2	Kif1a	0.070041	0.0330853	0.262827	0.123565	0.0864981	0.0249559	0.260041	0.0205753	9.21364	1.46486	0.692582	2.11507	0.0344243	0.116618	UP
ENSMUSG00000014603	1892	0	0	0	0	0	0	0	0	Alx3	0	0	0	0	0	0	0	0	0	NA	NA	NA	NA	NA	NA
ENSMUSG00000014606	2120	1152	1084	1285	865	997	1024	1302	1176	Slc25a11	59.1834	52.6125	59.4537	42.7626	47.4414	56.2328	64.7844	53.2437	1103.81	-0.232217	0.134466	-1.72695	0.0841763	0.221574	NOT
ENSMUSG00000014609	1690	1	0	0	0	0	1	2	1	Chrne	0.064446	0	0	0	0	0.0688872	0.124836	0.056795	0.626395	-0.912564	2.0647	-0.441984	0.658501	NA	NOT
ENSMUSG00000014633	2043	60	64	73	67	80	48	94	99	Cmc2	3.19864	3.22335	3.50482	3.43709	3.95021	2.73526	4.8535	4.65119	71.8796	-0.216334	0.221571	-0.976367	0.328882	0.541989	NOT
ENSMUSG00000014668	4437	230	210	248	234	224	231	223	262	Chfr	5.64575	4.86996	5.48244	5.52727	5.0928	6.06105	5.30165	5.66772	232.735	-0.332714	0.133461	-2.49297	0.0126678	0.0551218	NOT
ENSMUSG00000014686	1635	1	2	1	2	0	0	2	3	Ceacam16	0.066614	0.125866	0.0599921	0.128202	0	0	0.129035	0.176117	1.30409	0.582463	1.36779	0.425843	0.670222	NA	NOT
ENSMUSG00000014704	1775	7	7	17	16	9	13	12	3	Hoxa2	0.429519	0.405784	0.939425	0.944726	0.511496	0.852649	0.713145	0.162226	10.358	0.381023	0.54842	0.694766	0.487202	0.682292	NOT
ENSMUSG00000014725	9184	0	0	0	0	0	0	0	0	Adam28	0	0	0	0	0	0	0	0	0	NA	NA	NA	NA	NA	NA
ENSMUSG00000014747	1739	0	2	0	1	0	0	1	0	Ankrd53	0	0.118338	0	0.0602677	0	0	0.0606591	0	0.463922	2.19304	2.35569	0.930955	0.351877	NA	NOT
ENSMUSG00000014748	4088	765	1111	954	1088	1018	841	1006	1053	Tex261	20.3814	27.964	22.8902	27.8935	25.1209	23.9503	25.9587	24.7238	971.306	-0.0914531	0.132563	-0.689883	0.490268	0.684483	NOT
ENSMUSG00000014763	8345	307	283	411	362	313	330	366	402	Fam120b	4.00678	3.48944	4.83089	4.54639	3.78369	4.60376	4.62647	4.62377	344.158	-0.212314	0.137962	-1.53892	0.123823	0.289941	NOT
ENSMUSG00000014767	13576	153	231	224	199	161	177	254	199	Tbp	1.22745	1.7508	1.61841	1.53626	1.19633	1.51784	1.97359	1.40695	196.537	0.111963	0.147091	0.761185	0.446546	0.650755	NOT
ENSMUSG00000014769	4595	1216	1316	1380	1409	1365	1214	1401	1485	Psmb1	28.8225	29.469	29.4581	32.1373	29.9671	30.758	32.1624	31.0197	1341.08	-0.217532	0.0916817	-2.37269	0.017659	0.0708926	NOT
ENSMUSG00000014771	2582	0	0	0	0	0	0	0	0	Pdcd2	0	0	0	0	0	0	0	0	0	NA	NA	NA	NA	NA	NA
ENSMUSG00000014773	4219	37	69	91	83	56	48	97	54	Dll1	0.955158	1.68281	2.11565	2.06183	1.33899	1.32452	2.42526	1.22852	64.6724	0.517356	0.211051	2.45133	0.0142328	0.0601006	UP
ENSMUSG00000014776	3176	14	11	17	10	9	7	24	17	Nol3	0.480099	0.356375	0.525025	0.329992	0.285864	0.256592	0.797124	0.513766	13.1798	0.112623	0.453616	0.248278	0.80392	0.899764	NOT
ENSMUSG00000014778	4666	100	146	198	134	127	93	178	127	Fhod1	2.3342	3.21961	4.16229	3.00985	2.74573	2.3204	4.02412	2.6125	134.156	0.271308	0.165778	1.63657	0.10172	0.252718	NOT
ENSMUSG00000014782	5478	1	0	1	1	3	0	2	1	Plekhg4	0.019882	0	0.0179056	0.0191321	0.0552456	0	0.0385126	0.0175216	1.0941	-0.602769	1.47689	-0.408135	0.683174	NA	NOT
ENSMUSG00000014786	5240	4	9	18	4	14	7	17	8	Slc9a5	0.0831403	0.176729	0.33694	0.0800042	0.269522	0.155522	0.342226	0.14654	9.74194	0.244485	0.571089	0.428103	0.668576	0.814968	NOT
ENSMUSG00000014791	3485	268	227	286	194	341	312	178	400	Elmo3	8.37558	6.70222	8.04961	5.83423	9.87074	10.4226	5.38781	11.0168	279.654	-0.851785	0.177316	-4.80378	1.56e-06	3.5e-05	DOWN
ENSMUSG00000014813	4197	7	4	11	12	1	4	11	4	Stc1	0.181653	0.0980656	0.257078	0.299658	0.0240358	0.110955	0.276471	0.0914783	6.46209	0.942061	0.669223	1.4077	0.159221	0.341194	NOT
ENSMUSG00000014837	4045	20	8	12	8	19	13	12	2	4931428F04Rik	0.538511	0.203501	0.290987	0.207279	0.473842	0.374154	0.312938	0.0474579	12.0417	-0.754683	0.576603	-1.30884	0.190587	0.38439	NOT
ENSMUSG00000014846	1848	4	24	16	8	3	17	31	8	Tppp3	0.235744	1.3363	0.849238	0.453704	0.163764	1.07096	1.76952	0.415513	13.3531	0.973802	0.597524	1.62973	0.103159	0.255389	NOT
ENSMUSG00000014850	11254	208	159	177	144	172	186	179	208	Msh3	2.01298	1.45374	1.54269	1.34103	1.54177	1.92412	1.6778	1.774	180.219	-0.520404	0.149457	-3.48197	0.000497731	0.00429828	DOWN
ENSMUSG00000014852	4925	65	70	94	84	109	73	85	79	Adamts13	1.43744	1.46247	1.87212	1.78755	2.23264	1.72561	1.82057	1.53963	81.8465	-0.251162	0.207147	-1.21249	0.225327	0.427547	NOT
ENSMUSG00000014856	1511	180	326	254	318	278	190	209	246	Tmem208	12.9745	22.1998	16.4885	22.057	18.56	14.6391	14.5907	15.6267	247.608	0.0510919	0.206502	0.247416	0.804586	0.900061	NOT
ENSMUSG00000014859	2452	216	300	353	305	284	194	296	312	E2f4	9.59437	12.5891	14.121	13.0366	11.6841	9.21099	12.734	12.2132	277.309	0.0495673	0.144693	0.342569	0.731922	0.856081	NOT
ENSMUSG00000014867	3281	2639	2564	3106	2884	2915	2510	2981	2876	Surf4	87.6024	80.4095	92.8553	92.1241	89.6253	89.0621	95.8409	84.1356	2792.58	-0.207709	0.0861324	-2.41151	0.0158867	0.0655897	NOT
ENSMUSG00000014873	3408	147	172	148	138	130	97	162	127	Surf2	4.69787	5.19307	4.25965	4.24389	3.84806	3.31358	5.0143	3.57685	138.402	0.0291305	0.176474	0.16507	0.868889	0.936489	NOT
ENSMUSG00000014905	2549	455	570	793	721	563	507	793	784	Dnajb9	19.4413	23.0091	30.5151	29.6449	22.2811	23.156	32.817	29.5218	634.849	0.0422024	0.147259	0.286586	0.774429	0.881171	NOT
ENSMUSG00000014907	3094	69	122	101	80	81	71	118	95	Naf1	2.42891	4.05728	3.20194	2.7099	2.64097	2.67155	4.02306	2.94714	90.4001	0.137472	0.19836	0.693042	0.488283	0.682956	NOT
ENSMUSG00000014932	7508	336	222	409	294	283	342	373	357	Yes1	4.87414	3.04246	5.34331	4.104	3.80242	5.30307	5.24059	4.56395	325.778	-0.324427	0.177762	-1.82506	0.0679913	0.190419	NOT
ENSMUSG00000014956	10913	1370	1410	2046	1554	1153	1255	1883	1405	Ppp1cb	13.6729	13.2945	18.3896	14.9242	10.6582	13.3883	18.2013	12.3575	1482.15	0.116275	0.12867	0.903672	0.366169	0.578943	NOT
ENSMUSG00000014959	4145	912	1106	1120	1072	1075	932	1080	1150	Gorasp2	23.9637	27.4553	26.5036	27.1053	26.1627	26.1768	27.4849	26.6299	1048.73	-0.17033	0.100431	-1.69599	0.0898878	0.232292	NOT
ENSMUSG00000014980	4195	52	77	71	101	49	39	90	64	Tsen15	1.35006	1.88866	1.66011	2.52333	1.17832	1.08233	2.26311	1.46435	65.9304	0.461629	0.222583	2.07396	0.038083	0.125421	NOT
ENSMUSG00000015001	1912	0	0	0	1	0	0	0	0	Oc90	0	0	0	0.0548146	0	0	0	0	0.117714	0.43757	3.53381	0.123824	0.901455	NA	NOT
ENSMUSG00000015002	11399	779	656	940	754	773	678	904	797	Efr3a	7.4431	5.92151	8.08859	6.93248	6.84086	6.9245	8.3656	6.71102	778.145	-0.186178	0.114567	-1.62505	0.104152	0.256977	NOT
ENSMUSG00000015013	1950	107	132	132	173	151	111	132	140	Trappc2l	5.9763	6.96522	6.63974	9.29813	7.81161	6.62695	7.1406	6.89113	133.639	-0.109824	0.183253	-0.599302	0.548971	0.73054	NOT
ENSMUSG00000015016	3747	445	551	503	453	530	417	444	496	Acsf3	12.9348	15.1309	13.1673	12.6706	14.2689	12.9562	12.4996	12.7056	478.447	-0.226061	0.13788	-1.63954	0.101101	0.251699	NOT
ENSMUSG00000015023	2957	280	357	366	370	347	235	383	375	Ddx19a	10.3131	12.4226	12.1406	13.114	11.8379	9.25213	13.6629	12.1724	333.736	-0.0145213	0.129866	-0.111818	0.910968	0.957727	NOT
ENSMUSG00000015027	2650	111	177	256	182	118	82	211	136	Galns	4.56205	6.87263	9.47558	7.19797	4.49194	3.60241	8.39908	4.92595	153.062	0.60796	0.168026	3.61825	0.000296597	0.00284237	UP
ENSMUSG00000015053	5398	22	48	18	28	26	8	20	26	Gata2	0.443887	0.914964	0.327078	0.543637	0.485891	0.172537	0.390834	0.462314	24.1032	0.244629	0.43746	0.559202	0.576024	0.751667	NOT
ENSMUSG00000015083	1493	2164	1576	1789	1615	2554	1976	1058	2310	C8g	157.863	108.616	117.534	113.37	172.568	154.082	74.7517	148.508	1914.7	-0.846492	0.175834	-4.81415	1.48e-06	3.36e-05	DOWN
ENSMUSG00000015085	2128	34	60	50	79	23	35	55	31	Entpd2	1.74016	2.90118	2.30468	3.89081	1.09032	1.91479	2.72638	1.39826	44.7232	0.705597	0.286798	2.46026	0.0138838	0.0591159	UP
ENSMUSG00000015087	6379	215	316	314	333	309	217	388	285	Rabl6	3.67087	5.09718	4.82824	5.47112	4.88657	3.96034	6.41615	4.28834	291.268	0.120486	0.138062	0.872696	0.382829	0.594778	NOT
ENSMUSG00000015090	1649	9	44	7	71	27	10	9	3	Ptgds	0.594436	2.74554	0.416379	4.51255	1.65174	0.706	0.575728	0.174621	22.1136	1.18925	0.964004	1.23366	0.217331	0.418166	NOT
ENSMUSG00000015092	1317	594	1204	680	1129	1226	520	638	801	Edf1	49.1229	94.0668	50.6448	89.8447	93.908	45.9666	51.1011	58.3772	842.442	-0.0190411	0.279001	-0.0682475	0.945589	0.97366	NOT
ENSMUSG00000015093	1012	4	4	12	14	7	5	10	7	Clic3	0.430489	0.406701	1.16309	1.44988	0.697775	0.575195	1.04235	0.663918	7.58575	0.518166	0.577535	0.897204	0.36961	0.582318	NOT
ENSMUSG00000015094	3906	43	82	172	202	72	41	208	51	Npdc1	1.199	2.16012	4.31924	5.42005	1.85951	1.22202	5.61728	1.25324	102.086	1.39351	0.279191	4.99127	6e-07	1.57e-05	UP
ENSMUSG00000015095	3052	514	735	696	736	671	559	722	658	Fbxw5	18.3426	24.7798	22.3685	25.2742	22.1787	21.3232	24.9544	20.6937	653.844	-0.00890805	0.118572	-0.0751279	0.940113	0.971415	NOT
ENSMUSG00000015112	3798	4383	2919	4884	3258	4428	4248	3556	5099	Slc25a13	125.69	79.0814	126.134	89.9043	117.612	130.213	98.7648	128.863	4117.92	-0.602793	0.140658	-4.28552	1.82e-05	0.000281687	DOWN
ENSMUSG00000015120	5474	628	1001	915	875	742	645	1095	820	Ube2i	12.495	18.8159	16.3956	16.7528	13.6741	13.7177	21.1011	14.3782	823.525	0.177063	0.110793	1.59814	0.110012	0.266169	NOT
ENSMUSG00000015126	1192	122	163	123	150	158	106	111	140	Tsr3	11.1472	14.0704	10.1214	13.1886	13.3715	10.3527	9.82295	11.2732	133.816	-0.206175	0.202611	-1.01759	0.308873	0.521815	NOT
ENSMUSG00000015127	5673	133	180	198	169	139	134	198	169	Unkl	2.55342	3.26479	3.42345	3.12218	2.47172	2.7499	3.68169	2.85937	162.182	0.0925974	0.140944	0.65698	0.511194	0.702207	NOT
ENSMUSG00000015133	10307	282	320	415	272	296	222	427	295	Lrrk1	2.97989	3.19458	3.94937	2.7658	2.89706	2.50753	4.37009	2.74718	309.363	0.101206	0.148015	0.683753	0.494131	0.68811	NOT
ENSMUSG00000015134	4617	15	62	57	49	29	20	76	25	Aldh1a3	0.353846	1.38174	1.21095	1.1123	0.633631	0.504307	1.7364	0.519729	39.4294	1.17506	0.27941	4.20551	2.6e-05	0.000376606	UP
ENSMUSG00000015143	5533	296	250	500	415	303	330	618	336	Actn1	5.82658	4.64916	8.86382	7.86089	5.52434	6.9435	11.7821	5.82875	371.282	0.186295	0.208074	0.89533	0.370611	0.583377	NOT
ENSMUSG00000015149	5035	526	526	540	538	616	492	428	643	Sirt2	11.3781	10.7493	10.5198	11.1987	12.3418	11.376	8.96684	12.2577	540.131	-0.433542	0.138155	-3.13808	0.00170059	0.0112861	NOT
ENSMUSG00000015165	5953	1698	2295	2093	1938	1662	1618	2406	1788	Hnrnpl	31.066	39.6682	34.4862	34.1195	28.1639	31.6423	42.6339	28.8289	1910.3	0.0832134	0.109342	0.761037	0.446635	0.650755	NOT
ENSMUSG00000015176	3971	356	566	482	493	376	270	522	408	Nolc1	9.76412	14.666	11.9058	13.0116	9.55182	7.9157	13.8665	9.86182	424.566	0.280239	0.136136	2.05853	0.0395398	0.128622	NOT
ENSMUSG00000015189	4037	454	236	369	263	335	396	323	410	Casd1	12.2484	6.01518	8.9656	6.82781	8.37113	11.4199	8.43993	9.74815	352.71	-0.721375	0.16671	-4.32712	1.51e-05	0.000240705	DOWN
ENSMUSG00000015202	3837	148	244	249	211	227	145	281	167	Cnksr3	4.201	6.54325	6.3653	5.76335	5.96805	4.39948	7.7252	4.17755	204.191	0.238776	0.164301	1.45328	0.146146	0.321925	NOT
ENSMUSG00000015214	5859	765	456	796	547	655	617	680	714	Mtmr1	14.2207	8.00824	13.326	9.78471	11.2776	12.2599	12.2428	11.6969	653.629	-0.447479	0.15608	-2.86699	0.00414401	0.0229637	NOT
ENSMUSG00000015217	2234	118	227	127	164	160	106	216	125	Hmgb3	5.75283	10.4553	5.57612	7.69387	7.22495	5.52393	10.1992	5.37061	152.43	0.25592	0.220077	1.16287	0.244883	0.450627	NOT
ENSMUSG00000015222	16456	9	23	55	41	13	10	67	12	Map2	0.0595664	0.143813	0.327831	0.261122	0.0796924	0.0707458	0.429483	0.0699929	26.5266	1.77949	0.383231	4.64339	3.43e-06	6.78e-05	UP
ENSMUSG00000015224	3337	157	121	141	108	191	129	149	233	Cyp2j9	5.1242	3.73099	4.14452	3.39197	5.77398	4.50048	4.71005	6.70188	153.946	-0.724071	0.169716	-4.26636	1.99e-05	0.000302555	DOWN
ENSMUSG00000015242	1733	0	0	0	0	0	0	0	0	Nipsnap3a	0	0	0	0	0	0	0	0	0	NA	NA	NA	NA	NA	NA
ENSMUSG00000015243	10363	3137	3931	3294	2333	2823	2979	3280	4219	Abca1	32.9695	39.0313	31.1781	23.5946	27.4804	33.4665	33.3875	39.077	3239.94	-0.307684	0.172143	-1.78738	0.0738761	0.201542	NOT
ENSMUSG00000015247	1687	771	734	1148	935	947	727	903	825	Nipsnap3b	49.7763	44.7689	66.748	58.0872	56.6282	50.1701	56.4635	46.9392	863.981	-0.0999503	0.138013	-0.72421	0.468937	0.668714	NOT
ENSMUSG00000015289	2021	100	103	118	160	140	97	133	151	Lage3	5.38911	5.24404	5.727	8.29732	6.98811	5.58767	6.94194	7.17146	123.949	-0.1936	0.194733	-0.99418	0.320135	0.533057	NOT
ENSMUSG00000015290	3142	271	477	464	544	289	256	553	366	Ubl4a	9.3939	15.621	14.4852	18.1458	9.27876	9.48547	18.5658	11.1808	390.228	0.512217	0.128521	3.98547	6.73e-05	0.000843434	UP
ENSMUSG00000015290	3142	271	477	464	544	289	256	553	366	Gm44504	9.3939	15.621	14.4852	18.1458	9.27876	9.48547	18.5658	11.1808	390.228	0.512217	0.128521	3.98547	6.73e-05	0.000843434	UP
ENSMUSG00000015291	4296	585	505	677	552	641	497	593	641	Gdi1	14.8311	12.0955	15.4574	13.4666	15.0519	13.4684	14.5608	14.3216	583.433	-0.304785	0.110901	-2.74825	0.00599142	0.03082	NOT
ENSMUSG00000015305	8568	806	999	968	956	730	905	1211	965	Sash1	10.2456	11.9972	11.0817	11.694	8.59491	12.2969	14.9094	10.8105	931.986	-0.0107229	0.13506	-0.0793937	0.936719	0.969859	NOT
ENSMUSG00000015312	1589	90	123	290	189	420	124	298	188	Gadd45b	6.16881	7.96483	17.9013	12.4659	26.6639	9.08496	19.7828	11.3561	209.677	-0.147105	0.510243	-0.288305	0.773114	0.880396	NOT
ENSMUSG00000015314	10832	18	13	18	13	10	12	36	13	Slamf6	0.180987	0.12349	0.162995	0.125782	0.09313	0.128973	0.350582	0.115194	16.1088	0.281309	0.441399	0.637314	0.52392	0.712064	NOT
ENSMUSG00000015316	6156	3	4	4	3	2	4	11	3	Slamf1	0.0530769	0.0668585	0.0637343	0.0510748	0.032774	0.0756461	0.18849	0.0467756	4.08594	0.55806	0.775826	0.719311	0.471949	0.670627	NOT
ENSMUSG00000015335	1785	123	138	172	130	169	137	138	172	Zdhhc12	7.50499	7.95493	9.45152	7.6329	9.55095	8.93527	8.15523	9.24884	146.806	-0.334401	0.161673	-2.06838	0.0386042	0.126556	NOT
ENSMUSG00000015337	1063	130	225	173	219	243	180	154	245	Endog	13.3197	21.7793	15.9634	21.5921	23.0606	19.7135	15.2821	22.1223	195.868	-0.304465	0.222585	-1.36786	0.171357	0.358517	NOT
ENSMUSG00000015340	5808	437	704	883	764	472	377	1205	447	Cybb	8.19479	12.4722	14.9123	13.7864	8.19811	7.55684	21.8855	7.38717	632.965	0.742061	0.146741	5.05693	4.26e-07	1.18e-05	UP
ENSMUSG00000015341	6726	691	769	1002	832	578	611	935	769	Golga7	11.1893	11.7643	14.6124	12.9643	8.669	10.5757	14.6639	10.974	759.029	0.130985	0.119832	1.09307	0.274365	0.485222	NOT
ENSMUSG00000015342	5076	100	84	108	108	61	73	142	123	Xk	2.14566	1.70276	2.08696	2.22991	1.21229	1.67427	2.95095	2.32584	97.8707	0.0241253	0.229395	0.105169	0.916241	0.959535	NOT
ENSMUSG00000015354	4625	52	64	70	89	44	38	85	46	Pcolce2	1.22454	1.42385	1.48456	2.0168	0.959708	0.956527	1.93866	0.954647	59.2964	0.491726	0.225104	2.18444	0.0289301	0.102561	NOT
ENSMUSG00000015355	1189	38	47	93	65	37	29	116	51	Cd48	3.48085	4.06735	7.67207	5.72949	3.13919	2.8395	10.2913	4.11704	56.447	0.758117	0.277105	2.73585	0.00622192	0.0317346	UP
ENSMUSG00000015357	3494	4844	4217	5164	4120	4516	5188	3907	6581	Clpx	150.996	124.187	144.969	123.583	130.385	172.863	117.955	180.786	4846.25	-0.558033	0.140853	-3.96182	7.44e-05	0.000911875	DOWN
ENSMUSG00000015363	5591	675	773	640	693	1065	756	589	935	Trabd	13.1491	14.2261	11.228	12.9906	19.2158	15.7419	11.1127	16.0516	772.433	-0.612009	0.166178	-3.68284	0.00023065	0.00232818	DOWN
ENSMUSG00000015365	4183	0	1	0	0	0	0	0	0	Mov10l1	0	0.0245984	0	0	0	0	0	0	0.121042	0.43757	3.53381	0.123824	0.901455	NA	NOT
ENSMUSG00000015377	5896	87	124	96	95	109	120	71	145	Dennd6b	1.60711	2.16401	1.59708	1.68869	1.86495	2.36946	1.27027	2.36052	106.861	-0.52069	0.235217	-2.21366	0.0268525	0.0968034	DOWN
ENSMUSG00000015396	2572	58	124	188	162	87	67	282	68	Cd83	2.45607	4.96074	7.16966	6.60128	3.41229	3.0327	11.5657	2.53767	122.073	1.13133	0.233454	4.84608	1.26e-06	2.94e-05	UP
ENSMUSG00000015401	1544	0	1	4	2	1	0	5	0	Cltrn	0	0.066642	0.254111	0.135758	0.0653357	0	0.3416	0	1.44104	2.9891	1.49096	2.00481	0.0449831	NA	UP
ENSMUSG00000015405	3762	11	12	19	10	10	11	17	10	Ace2	0.318461	0.328215	0.495389	0.27859	0.268151	0.340408	0.476678	0.25514	12.2469	0.168465	0.434376	0.387833	0.69814	0.835221	NOT
ENSMUSG00000015437	1436	20	17	21	36	22	21	12	16	Gzmb	1.51691	1.21812	1.43442	2.62744	1.54549	1.70251	0.881499	1.06945	20.7371	-0.155278	0.411013	-0.377793	0.705584	0.839849	NOT
ENSMUSG00000015441	919	0	0	0	0	0	0	0	0	Gzmf	0	0	0	0	0	0	0	0	0	NA	NA	NA	NA	NA	NA
ENSMUSG00000015443	990	0	0	0	0	0	0	0	0	Gzmn	0	0	0	0	0	0	0	0	0	NA	NA	NA	NA	NA	NA
ENSMUSG00000015451	6206	136	100	38	47	178	123	32	219	C4a	2.38677	1.658	0.600597	0.793726	2.89339	2.30738	0.543918	3.38711	113.574	-1.82712	0.330613	-5.52647	3.27e-08	1.31e-06	DOWN
ENSMUSG00000015452	2141	4	15	9	5	4	7	21	9	Ager	0.203482	0.720892	0.412323	0.244758	0.18847	0.380633	1.03466	0.403481	8.83549	0.769089	0.588367	1.30716	0.191159	0.385098	NOT
ENSMUSG00000015461	2757	244	256	282	285	279	241	276	320	Atf6b	9.63909	9.5543	10.0328	10.8341	10.2086	10.1767	10.5601	11.1406	271.381	-0.256332	0.12324	-2.07994	0.0375307	0.124147	NOT
ENSMUSG00000015467	1761	5	4	7	6	3	1	7	8	Egfl8	0.309239	0.23372	0.389897	0.357089	0.171854	0.0661098	0.419309	0.436041	4.91685	0.235956	0.702725	0.335772	0.737043	0.859559	NOT
ENSMUSG00000015468	8061	64	58	79	70	85	49	69	65	Notch4	0.864717	0.740346	0.96128	0.910109	1.06372	0.707673	0.902933	0.773965	66.7629	-0.209367	0.215158	-0.973085	0.330511	0.543554	NOT
ENSMUSG00000015474	2614	164	251	267	241	211	179	229	258	Ppt2	6.83315	9.88015	10.0188	9.66264	8.14282	7.9721	9.24113	9.47351	221.639	0.013393	0.151076	0.0886508	0.929359	0.965917	NOT
ENSMUSG00000015476	2306	4	7	15	8	9	8	25	9	Prrt1	0.188923	0.312345	0.638034	0.363593	0.393714	0.403883	1.1436	0.374611	10.0968	0.568128	0.542532	1.04718	0.295017	0.507408	NOT
ENSMUSG00000015478	1483	216	186	144	176	346	162	147	235	Rnf5	15.8634	12.9053	9.5243	12.4381	23.536	12.7174	10.4561	15.2098	204.045	-0.813469	0.217654	-3.73743	0.000185909	0.00194529	DOWN
ENSMUSG00000015484	3882	1	6	6	15	1	0	18	2	Fam163a	0.0280561	0.159034	0.151603	0.404967	0.0259862	0	0.489116	0.0494506	5.5339	3.21806	0.946839	3.39874	0.000676972	0.00549962	UP
ENSMUSG00000015488	4693	261	277	280	370	337	251	299	301	Cacfd1	6.05721	6.0733	5.8522	8.26296	7.24398	6.22656	6.72072	6.1562	295.366	-0.181455	0.155805	-1.16463	0.24417	0.450048	NOT
ENSMUSG00000015501	13720	159	145	162	123	113	150	192	184	Hivep2	1.26219	1.08745	1.15817	0.939583	0.83085	1.27281	1.47619	1.28724	152.583	-0.25397	0.188274	-1.34894	0.177358	0.366252	NOT
ENSMUSG00000015519	1858	0	0	0	0	0	0	0	0	2310057J18Rik	0	0	0	0	0	0	0	0	0	NA	NA	NA	NA	NA	NA
ENSMUSG00000015522	8007	581	595	713	663	582	595	769	602	Arnt	7.90295	7.64615	8.73436	8.67817	7.33249	8.65112	10.131	7.21645	631.497	-0.0766032	0.111967	-0.684159	0.493875	0.68798	NOT
ENSMUSG00000015533	7133	46	130	54	45	133	94	64	97	Itga2	0.702374	1.87528	0.742563	0.661187	1.88095	1.5342	0.946462	1.30526	83.8896	-0.589841	0.368079	-1.60248	0.109049	0.26457	NOT
ENSMUSG00000015536	9054	1044	1092	1140	1018	1153	1040	1113	1394	Mocs2	12.5587	12.4102	12.3503	11.784	12.8466	13.3727	12.9673	14.7781	1121.8	-0.361555	0.0994114	-3.63696	0.000275874	0.00267881	NOT
ENSMUSG00000015542	2066	248	251	270	249	266	248	239	377	Nat9	13.0739	12.5008	12.8187	12.6315	12.9882	13.9748	12.2029	17.5149	268.309	-0.444619	0.146336	-3.03833	0.0023789	0.014792	NOT
ENSMUSG00000015568	10478	1300	2381	3923	2289	1534	1389	5785	1547	Lpl	13.5129	23.3817	36.7241	22.8956	14.7688	15.433	58.2398	14.1713	2373.48	1.00465	0.222817	4.50886	6.52e-06	0.000117632	UP
ENSMUSG00000015575	3712	325	502	701	665	370	371	682	427	Atp6v0e	9.53583	13.9153	18.5234	18.7758	10.0552	11.6357	19.3808	11.0412	489.99	0.486003	0.13	3.7385	0.000185122	0.00193859	NOT
ENSMUSG00000015579	1719	0	0	0	0	0	0	0	0	Nkx2-5	0	0	0	0	0	0	0	0	0	NA	NA	NA	NA	NA	NA
ENSMUSG00000015597	13804	451	420	511	419	370	409	573	530	Zfp318	3.5584	3.13069	3.63101	3.18122	2.70393	3.4494	4.3787	3.68526	455.612	-0.160806	0.136695	-1.17638	0.239441	0.444229	NOT
ENSMUSG00000015599	14097	9	12	5	11	10	8	7	14	Ttbk1	0.0695343	0.0875891	0.03479	0.0817806	0.0715602	0.0660676	0.0523801	0.0953231	9.5569	-0.48351	0.510381	-0.947352	0.34346	0.55697	NOT
ENSMUSG00000015605	2893	187	307	201	275	309	180	314	203	Srf	7.04006	10.9191	6.8149	9.9625	10.7748	7.24351	11.4492	6.73511	243.725	0.0482096	0.209926	0.229651	0.818363	0.907523	NOT
ENSMUSG00000015619	3978	8	11	15	14	5	5	20	8	Gata3	0.219032	0.284527	0.369861	0.368848	0.126795	0.146329	0.530347	0.193029	10.2271	0.918205	0.485736	1.89034	0.058713	0.171203	NOT
ENSMUSG00000015627	3277	2	2	2	0	2	1	1	0	Gata5	0.0664717	0.0627985	0.0598639	0	0.0615675	0.0355262	0.0321898	0	1.26357	-0.303877	1.38558	-0.219315	0.826405	NA	NOT
ENSMUSG00000015647	11388	126	323	425	328	179	102	794	144	Lama5	1.20505	2.91844	3.66061	3.01864	1.58564	1.04274	7.35476	1.2137	281.1	1.46376	0.250946	5.83296	5.45e-09	2.81e-07	UP
ENSMUSG00000015652	1377	3	0	1	1	0	0	2	0	Steap1	0.237285	0	0.0712324	0.0761115	0	0	0.153211	0	0.861023	0.0597724	1.87304	0.0319119	0.974542	NA	NOT
ENSMUSG00000015653	12144	216	241	346	229	246	227	400	226	Steap2	1.9372	2.04198	2.79464	1.97632	2.04348	2.17615	3.47451	1.78626	260.796	0.108607	0.171791	0.632204	0.527253	0.715325	NOT
ENSMUSG00000015656	4301	10077	11369	17594	15837	13800	10574	14058	12443	Hspa8	255.179	271.987	401.242	385.912	323.674	286.217	344.786	277.685	13002.8	0.0461636	0.140419	0.328757	0.74234	0.862949	NOT
ENSMUSG00000015659	4576	43	66	69	53	65	35	63	61	Serac1	1.02345	1.48407	1.47902	1.21388	1.43293	0.890445	1.45228	1.2795	55.7668	0.0300844	0.233485	0.128849	0.897477	0.951408	NOT
ENSMUSG00000015665	1390	0	0	0	0	0	0	0	0	Awat1	0	0	0	0	0	0	0	0	0	NA	NA	NA	NA	NA	NA
ENSMUSG00000015668	2127	109	159	166	181	132	134	215	130	Pdzd11	5.58139	7.69175	7.65512	8.91857	6.26044	7.33437	10.6627	5.86641	150.244	0.22461	0.16292	1.37865	0.168002	0.353426	NOT
ENSMUSG00000015671	3673	715	817	883	878	740	626	836	738	Psma2	21.2016	22.8874	23.5804	25.0529	20.324	19.8417	24.0094	19.2856	770.333	-0.00356397	0.104376	-0.0341456	0.972761	0.986819	NOT
ENSMUSG00000015672	4982	190	209	233	212	192	199	224	251	Mrpl32	4.15368	4.31656	4.58737	4.45981	3.88773	4.65023	4.74285	4.83578	212.35	-0.202311	0.135592	-1.49206	0.135683	0.307009	NOT
ENSMUSG00000015697	6853	364	309	406	323	304	327	386	400	Setdb1	5.785	4.63952	5.81108	4.93976	4.47498	5.5551	5.94158	5.60243	350.479	-0.258583	0.132115	-1.95726	0.0503174	0.153465	NOT
ENSMUSG00000015702	2073	16	10	32	20	15	13	36	25	Anxa9	0.840628	0.496359	1.51413	1.01115	0.729945	0.730078	1.83189	1.15754	20.0813	0.213251	0.407307	0.523563	0.600582	0.77018	NOT
ENSMUSG00000015709	7689	1	1	12	3	0	1	31	0	Arnt2	0.0141649	0.0133821	0.153082	0.0408917	0	0.015141	0.425292	0	5.2943	4.18284	1.34062	3.12007	0.00180809	0.0118503	UP
ENSMUSG00000015711	3618	517	551	901	836	426	371	887	447	Prune1	15.5634	15.6703	24.4269	24.2171	11.8779	11.938	25.8613	11.8587	596.164	0.55689	0.162464	3.42777	0.000608561	0.00504352	UP
ENSMUSG00000015714	3676	2561	2902	3080	2954	2289	2587	3227	3241	Cers2	75.8782	81.2302	82.1839	84.2208	62.8157	81.9306	92.6016	84.6253	2827.55	-0.0937576	0.113894	-0.823203	0.410393	0.619352	NOT
ENSMUSG00000015721	4847	0	0	0	0	0	0	0	0	Nlrp5	0	0	0	0	0	0	0	0	0	NA	NA	NA	NA	NA	NA
ENSMUSG00000015733	5890	1076	1174	1288	1173	919	913	1396	957	Capza2	19.8967	20.5092	21.4493	20.8721	15.7398	18.046	25.0015	15.5953	1096.12	0.0886061	0.11611	0.763124	0.44539	0.649869	NOT
ENSMUSG00000015745	2172	65	130	156	150	77	54	152	90	Plekho1	3.25939	6.15856	7.04492	7.23795	3.57626	2.8944	7.38208	3.97722	104.779	0.766109	0.174287	4.39567	1.1e-05	0.000185226	UP
ENSMUSG00000015747	3991	90	49	108	81	64	84	90	79	Vps45	2.45609	1.26331	2.65432	2.1271	1.61769	2.45032	2.37879	1.89995	80.3017	-0.255943	0.246189	-1.03962	0.298518	0.511289	NOT
ENSMUSG00000015748	5661	66	174	155	202	120	72	191	93	Prpf3	1.2698	3.16265	2.68565	3.73975	2.13839	1.48069	3.55906	1.57684	129.109	0.770954	0.201263	3.83059	0.000127837	0.00142362	UP
ENSMUSG00000015749	3566	314	391	363	328	295	283	343	343	Anp32e	9.59028	11.2821	9.98474	9.63999	8.34524	9.23911	10.1463	9.23229	329.837	-0.07133	0.133543	-0.534134	0.593249	0.765141	NOT
ENSMUSG00000015750	3450	726	862	643	793	826	704	705	843	Aph1a	22.9193	25.7089	18.2811	24.0901	24.1523	23.7563	21.5559	23.4534	763.915	-0.314659	0.146991	-2.14067	0.0323006	0.111205	NOT
ENSMUSG00000015755	6135	1671	1834	2074	1519	1352	1873	2264	2153	Tab2	29.665	30.7596	33.1593	25.9494	22.2311	35.5425	38.9276	33.6842	1827.49	-0.167538	0.160797	-1.04192	0.297447	0.510181	NOT
ENSMUSG00000015757	6450	262	338	313	328	228	191	368	243	Ppil4	4.4241	5.39203	4.75988	5.32965	3.56593	3.44746	6.01843	3.61613	278.04	0.263064	0.138492	1.89949	0.0575	0.168746	NOT
ENSMUSG00000015759	1623	466	521	615	552	399	423	584	494	Cnih1	31.2716	33.0305	37.1679	35.6455	24.8	30.3422	37.9568	29.215	499.56	0.0647875	0.117243	0.552591	0.580544	0.755595	NOT
ENSMUSG00000015766	12355	45	65	112	84	55	47	152	60	Eps8	0.396691	0.541335	0.889174	0.712559	0.449074	0.442874	1.29777	0.466128	73.8917	0.699001	0.246428	2.83653	0.0045606	0.0248154	UP
ENSMUSG00000015776	3614	306	422	461	511	406	257	472	345	Med22	9.22181	12.0149	12.5119	14.8189	11.3328	8.27885	13.7768	9.16279	388.896	0.232758	0.140567	1.65585	0.0977519	0.245839	NOT
ENSMUSG00000015787	1920	0	0	0	0	0	0	0	0	Abo	0	0	0	0	0	0	0	0	0	NA	NA	NA	NA	NA	NA
ENSMUSG00000015790	1753	259	194	265	313	301	244	216	331	Surf1	16.0917	11.3872	14.8278	18.7131	17.3214	16.2044	12.9977	18.1235	265.928	-0.472277	0.172892	-2.73162	0.0063023	0.0320186	NOT
ENSMUSG00000015804	5011	212	265	247	238	225	198	226	248	Med28	4.60781	5.44148	4.83486	4.97779	4.52956	4.60009	4.75751	4.75033	230.866	-0.129953	0.140234	-0.926691	0.354087	0.567111	NOT
ENSMUSG00000015806	1788	1496	1661	1407	1324	1617	1563	1134	1781	Qdpr	91.127	95.5867	77.1859	77.6077	91.2306	101.769	66.9023	95.6078	1510.75	-0.495406	0.156199	-3.17162	0.00151589	0.0103121	NOT
ENSMUSG00000015812	642	8	5	12	6	5	6	13	7	Gnrh1	1.35718	0.801365	1.8334	0.979491	0.785657	1.08803	2.13601	1.04655	7.53655	0.164961	0.562633	0.293196	0.769373	0.87823	NOT
ENSMUSG00000015829	12867	1	0	0	0	0	1	0	0	Tnr	0.00846459	0	0	0	0	0.0090479	0	0	0.295502	-1.79436	3.15093	-0.569469	0.569038	NA	NOT
ENSMUSG00000015837	3356	4652	5919	7388	9194	5111	3719	6584	5049	Sqstm1	150.974	181.477	215.932	287.122	153.632	129.012	206.949	144.404	5806.75	0.379006	0.15416	2.45853	0.0139508	0.0592736	NOT
ENSMUSG00000015839	3796	837	1289	1533	1429	923	721	1516	1097	Nfe2l2	24.015	34.9399	39.6121	39.4539	24.5286	22.1123	42.1277	27.7381	1133.42	0.414548	0.100968	4.10573	4.03e-05	0.000544829	NOT
ENSMUSG00000015843	2297	63	85	60	50	79	55	58	53	Rxrg	2.98719	3.80762	2.56213	2.28136	3.46948	2.78758	2.66356	2.21468	62.9929	-0.259118	0.256297	-1.011	0.312015	0.524238	NOT
ENSMUSG00000015846	6303	5088	6687	5341	5530	6578	4897	4699	6547	Rxra	87.919	109.164	83.1164	91.9522	105.28	90.4499	78.6418	99.6993	5670.34	-0.315222	0.155484	-2.02736	0.0426257	0.135984	NOT
ENSMUSG00000015850	4198	38	92	70	101	85	40	77	54	Adamtsl4	0.98588	2.25497	1.63556	2.52152	2.04256	1.10928	1.93483	1.23466	67.9596	0.389286	0.275339	1.41384	0.157408	0.338478	NOT
ENSMUSG00000015852	2334	0	0	0	1	0	0	2	0	Fcrls	0	0	0	0.0449038	0	0	0.0903908	0	0.325962	1.70103	3.02997	0.561402	0.574524	NA	NOT
ENSMUSG00000015854	2036	2130	4084	3807	4475	2691	1779	5465	2256	Cd5l	113.942	206.397	183.407	230.356	133.332	101.724	283.144	106.355	3208.29	0.729918	0.137239	5.31858	1.05e-07	3.55e-06	UP
ENSMUSG00000015869	3407	890	745	914	797	828	711	708	859	Prpsap1	28.4512	22.4999	26.3139	24.5172	24.5164	24.2953	21.9208	24.2001	806.462	-0.336106	0.128296	-2.61976	0.0087991	0.0417366	NOT
ENSMUSG00000015879	8598	5	2	2	1	6	1	0	2	Fam184b	0.0633367	0.0239347	0.0228162	0.0121895	0.0703966	0.0135403	0	0.022327	2.47624	-1.74634	1.09054	-1.60136	0.109297	NA	NOT
ENSMUSG00000015880	7066	7	38	68	37	16	3	68	14	Ncapg	0.107897	0.553357	0.943945	0.548798	0.228425	0.049428	1.01515	0.190174	28.6638	2.1245	0.402666	5.27609	1.32e-07	4.31e-06	UP
ENSMUSG00000015882	19019	172	174	331	265	148	143	293	182	Lcorl	0.984972	0.941363	1.70707	1.4603	0.785004	0.875334	1.62508	0.918503	206.73	0.42827	0.181984	2.35334	0.0186054	0.0738826	NOT
ENSMUSG00000015882	19019	172	174	331	265	148	143	293	182	Gm3414	0.984972	0.941363	1.70707	1.4603	0.785004	0.875334	1.62508	0.918503	206.73	0.42827	0.181984	2.35334	0.0186054	0.0738826	NOT
ENSMUSG00000015889	6102	353	335	413	312	315	339	352	434	Lta4h	6.30065	5.64895	6.6388	5.35879	5.20759	6.46774	6.08507	6.82676	355.438	-0.311993	0.135933	-2.29521	0.0217212	0.0827265	NOT
ENSMUSG00000015890	2421	2363	3176	2896	2647	2842	2812	2474	3708	Amdhd1	106.305	134.984	117.332	114.589	118.421	135.222	107.795	147.008	2862.67	-0.333846	0.150007	-2.22553	0.0260455	0.094786	NOT
ENSMUSG00000015932	1911	1740	2294	2118	1902	1676	1698	2189	2044	Dstn	99.168	123.517	108.712	104.312	88.4731	103.443	120.832	102.664	1937.52	-0.0310031	0.112755	-0.274961	0.783346	0.886774	NOT
ENSMUSG00000015937	6809	570	732	898	851	738	573	846	750	Macroh2a1	9.11747	11.0617	12.9361	13.0988	10.9338	9.79708	13.1064	10.5724	731.98	0.0617678	0.109143	0.565933	0.571439	0.748059	NOT
ENSMUSG00000015942	6200	73	62	97	56	93	44	93	68	Gtf2ird2	1.28237	1.02895	1.53459	0.946631	1.51318	0.826202	1.58229	1.05272	71.9798	-0.137943	0.248063	-0.55608	0.578156	0.753632	NOT
ENSMUSG00000015943	1082	125	187	158	200	207	142	154	248	Bola1	12.5825	17.7832	14.3232	19.3726	19.2993	15.2787	15.0137	21.9999	176.506	-0.298677	0.209184	-1.42782	0.153344	0.332512	NOT
ENSMUSG00000015944	7560	67	68	102	112	88	69	103	101	Castor2	0.965242	0.925513	1.3234	1.55267	1.17425	1.06256	1.43718	1.28232	87.2436	-0.0324116	0.203871	-0.158981	0.873684	0.938667	NOT
ENSMUSG00000015947	2589	53	112	122	140	85	44	153	78	Fcgr1	2.2296	4.45124	4.6221	5.66735	3.31196	1.97854	6.23383	2.89174	94.1951	0.748967	0.207537	3.60884	0.000307566	0.00292257	UP
ENSMUSG00000015950	3663	66	84	159	112	112	62	166	74	Ncf1	1.96241	2.3596	4.25767	3.20454	3.08446	1.97052	4.78042	1.93906	100.535	0.438019	0.240061	1.82461	0.0680594	0.190514	NOT
ENSMUSG00000015957	4137	0	25	2	2	4	0	3	3	Wnt11	0	0.621799	0.0474194	0.0506674	0.0975377	0	0.0764946	0.0696037	4.6847	2.0358	1.15891	1.75665	0.0789769	0.211387	NOT
ENSMUSG00000015961	4531	527	713	792	758	524	452	800	595	Adss	12.6678	16.1916	17.1452	17.5331	11.6664	11.6137	18.6248	12.6043	630.641	0.26656	0.0966256	2.75869	0.00580344	0.0300919	NOT
ENSMUSG00000015962	768	1	3	9	18	0	1	9	1	1700016C15Rik	0.141815	0.401935	1.14946	2.45638	0	0.151588	1.23617	0.124979	4.80982	3.41575	1.07033	3.1913	0.00141636	0.00978071	UP
ENSMUSG00000015966	3707	251	163	236	161	154	276	151	322	Il17rb	7.37453	4.52439	6.24455	4.55185	4.19079	8.66786	4.29684	8.33739	217.681	-0.785166	0.233809	-3.35815	0.000784666	0.00617813	DOWN
ENSMUSG00000015968	15183	66	27	48	52	42	61	44	84	Cacna1d	0.473445	0.182979	0.310095	0.358947	0.279055	0.467732	0.305696	0.531029	53.7286	-0.849934	0.276997	-3.06839	0.00215219	0.0136184	DOWN
ENSMUSG00000015970	6217	3212	2253	3582	3186	3218	2744	2573	3853	Chdh	56.2701	37.2886	56.514	53.7093	52.216	51.3841	43.657	59.486	3076.56	-0.44537	0.147144	-3.02677	0.00247183	0.0152424	NOT
ENSMUSG00000015971	9009	320	258	315	246	298	318	251	373	Actr8	3.86862	2.94672	3.42962	2.86182	3.33686	4.10937	2.93895	3.97401	299.609	-0.574177	0.138519	-4.14512	3.4e-05	0.000473555	DOWN
ENSMUSG00000015980	3637	4	6	8	8	8	3	19	7	Lrrc27	0.119784	0.169748	0.215754	0.230532	0.221894	0.0960292	0.551068	0.184736	7.45177	0.612103	0.599835	1.02045	0.307514	0.520772	NOT
ENSMUSG00000015981	2302	4	7	12	3	8	2	3	3	Stk32c	0.189251	0.312887	0.511314	0.136584	0.350576	0.101146	0.137471	0.125087	5.10676	0.283473	0.747492	0.379231	0.704516	0.839354	NOT
ENSMUSG00000015994	3012	377	407	422	399	364	353	455	491	Fnta	13.6323	13.9038	13.7426	13.8836	12.1911	13.6441	15.935	15.6467	405.096	-0.191077	0.117764	-1.62254	0.104688	0.257873	NOT
ENSMUSG00000016018	6404	247	278	382	249	263	242	321	286	Mtrex	4.20077	4.46672	5.85091	4.07504	4.14288	4.39936	5.28748	4.28659	279.601	-0.0426944	0.141096	-0.302591	0.762202	0.874341	NOT
ENSMUSG00000016024	4831	2473	3140	1849	1389	3257	3031	1625	3768	Lbp	55.7532	66.8787	37.5415	30.1335	68.0109	73.0422	35.4823	74.8636	2619.9	-0.903897	0.24094	-3.75155	0.000175743	0.00185736	DOWN
ENSMUSG00000016028	11007	270	114	247	140	399	248	209	328	Celsr1	2.67164	1.06569	2.2011	1.33304	3.65681	2.62306	2.00296	2.86024	247.923	-1.10175	0.211422	-5.21114	1.88e-07	5.83e-06	DOWN
ENSMUSG00000016087	3486	72	72	74	65	72	39	111	72	Fli1	2.24951	2.1252	2.08217	1.95421	2.08355	1.30245	3.35885	1.98245	70.4552	0.0555473	0.236099	0.235271	0.813998	0.905236	NOT
ENSMUSG00000016128	8594	296	258	435	267	265	306	276	379	Stard13	3.75128	3.08901	4.96484	3.25612	3.11063	4.14526	3.38773	4.23293	308.787	-0.299112	0.184354	-1.62249	0.104699	0.257873	NOT
ENSMUSG00000016150	17747	1	0	0	0	0	0	0	0	Tenm1	0.00613703	0	0	0	0	0	0	0	0.142333	-1.0051	3.53381	-0.284424	0.776085	NA	NOT
ENSMUSG00000016179	2759	0	0	0	0	3	0	1	0	Camk1g	0	0	0	0	0.10969	0	0.0382335	0	0.499218	-1.54522	2.71718	-0.568685	0.56957	NA	NOT
ENSMUSG00000016181	6530	92	127	132	118	106	99	127	108	Utp25	1.53447	2.00118	1.98277	1.89388	1.63754	1.76501	2.05157	1.58748	112.215	0.0336622	0.162145	0.207605	0.835537	0.917861	NOT
ENSMUSG00000016194	4251	4124	4959	2214	2601	5074	4076	1673	5118	Hsd11b1	105.66	120.032	51.0856	64.1259	120.409	111.627	41.5145	115.56	3827.1	-0.925788	0.384921	-2.40514	0.0161663	0.0664184	DOWN
ENSMUSG00000016200	11932	1	11	14	20	5	7	42	7	Syt14	0.00912788	0.0948582	0.115087	0.175671	0.0422722	0.0682983	0.371305	0.0563095	12.3034	1.81548	0.593723	3.05779	0.00222972	0.0140458	UP
ENSMUSG00000016206	1438	41	86	89	81	64	48	94	66	H2-M3	3.10533	6.15368	6.07075	5.90351	4.48972	3.88604	6.89548	4.40537	69.0608	0.401128	0.203456	1.97157	0.0486585	0.150007	NOT
ENSMUSG00000016239	3812	74	54	60	90	44	59	96	87	Lonrf3	2.11428	1.45759	1.54387	2.47442	1.16439	1.80187	2.65652	2.1906	69.6447	-0.0996769	0.265526	-0.375394	0.707368	0.840891	NOT
ENSMUSG00000016252	1756	679	1040	659	1150	1118	565	842	587	Atp5e	42.1142	60.9403	36.8106	68.6369	64.2267	37.4584	50.5805	32.0856	822.557	0.061776	0.244343	0.252825	0.800404	0.897877	NOT
ENSMUSG00000016253	2883	329	406	369	314	428	282	331	350	Nelfcd	12.4289	14.4903	12.5543	11.4148	14.976	11.3875	12.111	11.6525	349.76	-0.240078	0.157311	-1.52613	0.126977	0.294626	NOT
ENSMUSG00000016255	1406	1	2	1	1	9	3	4	2	Tubb1	0.0774636	0.146366	0.0697632	0.0745416	0.645736	0.248405	0.300103	0.136534	2.91677	-1.19401	0.994516	-1.20059	0.22991	NA	NOT
ENSMUSG00000016256	1441	2010	2506	2245	2260	2836	1740	1987	2260	Ctsz	151.92	178.942	152.814	164.372	198.536	140.576	145.455	150.536	2222.14	-0.240347	0.155367	-1.54696	0.121872	0.286768	NOT
ENSMUSG00000016257	1860	376	510	513	523	450	301	574	436	Prelid3b	22.017	28.2132	27.053	29.4695	24.4061	18.8399	32.5532	22.4994	450.858	0.165817	0.119834	1.38372	0.166444	0.350894	NOT
ENSMUSG00000016262	3850	1	4	5	4	3	2	4	1	Sertad4	0.0282893	0.106904	0.127386	0.108889	0.0786065	0.0604776	0.109596	0.0249308	2.87825	0.9932	0.895342	1.1093	0.267302	NA	NOT
ENSMUSG00000016283	1551	1	0	3	1	1	0	3	0	H2-M2	0.0702217	0	0.189723	0.0675729	0.0650409	0	0.204035	0	1.02831	1.46883	1.66311	0.883181	0.377139	NA	NOT
ENSMUSG00000016308	2272	239	235	339	297	212	227	316	278	Ube2a	11.457	10.6428	14.6353	13.7004	9.41295	11.6317	14.6715	11.7445	263.745	0.0249284	0.142342	0.175131	0.860977	0.932209	NOT
ENSMUSG00000016319	1646	3575	5365	4625	4728	4398	3355	5258	4164	Slc25a5	236.553	335.379	275.609	301.045	269.54	237.295	336.966	242.816	4365.85	0.0928096	0.111641	0.831322	0.405792	0.6157	NOT
ENSMUSG00000016327	4201	0	1	1	1	0	1	0	0	Atp1b4	0	0.024493	0.0233485	0.0249478	0	0.0277123	0	0	0.49999	1.04837	2.13913	0.490092	0.624069	NA	NOT
ENSMUSG00000016344	1336	450	498	428	476	500	454	393	682	Ppdpf	36.685	38.3547	31.4231	37.3409	37.7539	39.5617	31.03	48.9976	486.564	-0.478175	0.15827	-3.02126	0.00251725	0.0154626	NOT
ENSMUSG00000016346	16273	0	0	0	0	0	0	0	0	Kcnq2	0	0	0	0	0	0	0	0	0	NA	NA	NA	NA	NA	NA
ENSMUSG00000016349	2084	0	0	1	0	0	0	0	0	Eef1a2	0	0	0.0470667	0	0	0	0	0	0.108064	0.43757	3.53381	0.123824	0.901455	NA	NOT
ENSMUSG00000016356	5142	9	15	8	6	17	25	10	24	Col20a1	0.190631	0.300161	0.152605	0.122294	0.333515	0.566022	0.205146	0.447998	14.7202	-1.22108	0.477582	-2.5568	0.010564	0.0480509	DOWN
ENSMUSG00000016382	4238	872	525	719	550	715	749	714	909	Pls3	22.4098	12.7466	16.641	13.6015	17.0194	20.5753	17.7718	20.5873	724.818	-0.663927	0.129746	-5.11715	3.1e-07	8.95e-06	DOWN
ENSMUSG00000016386	3425	3	8	8	6	7	6	11	10	Mpped2	0.095399	0.240339	0.229108	0.183601	0.206175	0.203946	0.338787	0.280244	7.17884	0.0695398	0.56748	0.122541	0.90247	0.954024	NOT
ENSMUSG00000016409	4326	172	177	197	164	139	158	178	193	Nkap	4.33037	4.21	4.46675	3.97321	3.24135	4.25203	4.34039	4.28221	171.211	-0.169836	0.155682	-1.09091	0.275311	0.486067	NOT
ENSMUSG00000016427	419	246	387	287	461	473	230	265	279	Ndufa1	63.9446	95.0369	67.1861	115.311	113.879	63.9056	66.7156	63.9127	326.47	-0.063671	0.255703	-0.249004	0.803358	0.899367	NOT
ENSMUSG00000016458	6195	7	5	18	14	2	10	24	5	Wt1	0.123066	0.083047	0.284999	0.236849	0.0325677	0.187925	0.408663	0.0774686	10.102	1.00654	0.602834	1.66967	0.094984	0.241121	NOT
ENSMUSG00000016477	5429	157	235	234	228	155	161	303	195	E2f3	3.14965	4.45393	4.22773	4.40149	2.88012	3.45248	5.88733	3.44756	203.456	0.297056	0.143837	2.06522	0.0389022	0.127162	NOT
ENSMUSG00000016481	10349	513	576	726	634	440	394	679	543	Cr1l	5.39886	5.7269	6.88097	6.42059	4.28896	4.43224	6.92096	5.03615	551.414	0.186548	0.118374	1.57592	0.115043	0.275232	NOT
ENSMUSG00000016487	11135	690	829	1043	708	891	593	1006	784	Ppfibp1	6.74904	7.66055	9.18768	6.66388	8.07208	6.19997	9.53022	6.75807	803.68	-0.00501279	0.135782	-0.036918	0.97055	0.985695	NOT
ENSMUSG00000016493	7603	25	21	34	25	12	28	40	30	Cd46	0.358128	0.284204	0.438637	0.344619	0.159219	0.428744	0.554971	0.378733	26.4306	0.0340154	0.35421	0.0960316	0.923495	0.962589	NOT
ENSMUSG00000016494	7290	26	27	112	58	22	15	101	16	Cd34	0.388444	0.381094	1.50696	0.833844	0.304434	0.239546	1.46147	0.210664	43.5731	1.59734	0.394257	4.05151	5.09e-05	0.000665431	UP
ENSMUSG00000016495	3799	89	86	134	105	83	93	166	104	Plgrkt	2.55155	2.3293	3.45977	2.8967	2.20398	2.84996	4.60929	2.62761	105.133	0.113365	0.202844	0.55888	0.576243	0.751721	NOT
ENSMUSG00000016496	3622	63	69	75	52	50	37	104	45	Cd274	1.89441	1.96018	2.03107	1.50466	1.39258	1.18926	3.02887	1.19251	60.1449	0.325656	0.256523	1.2695	0.204262	0.402195	NOT
ENSMUSG00000016498	1961	4	1	0	1	1	1	5	0	Pdcd1lg2	0.22216	0.0524708	0	0.0534449	0.0514423	0.0593673	0.26896	0	1.61357	-0.133782	1.37703	-0.0971522	0.922606	NA	NOT
ENSMUSG00000016503	2548	33	32	28	25	36	18	30	40	Gtf3a	1.41058	1.29225	1.07788	1.02831	1.42528	0.822429	1.24199	1.50681	30.0666	-0.409266	0.299892	-1.36471	0.172345	0.359547	NOT
ENSMUSG00000016510	5127	199	146	229	174	219	176	135	226	Mtif3	4.22739	2.93012	4.38111	3.55689	4.30902	3.99645	2.77757	4.23099	188.799	-0.539925	0.181627	-2.97271	0.00295181	0.017533	DOWN
ENSMUSG00000016520	4557	649	650	646	632	639	483	705	631	Lnx2	15.5113	14.6767	13.9048	14.5352	14.1456	12.3394	16.3194	13.2907	624.188	-0.14666	0.114272	-1.28343	0.19934	0.395513	NOT
ENSMUSG00000016524	1149	0	0	0	0	0	0	0	0	Il19	0	0	0	0	0	0	0	0	0	NA	NA	NA	NA	NA	NA
ENSMUSG00000016526	3178	9	46	47	77	19	10	83	11	Dyrk3	0.308441	1.48936	1.45063	2.53934	0.603112	0.366329	2.75499	0.332228	35.0173	2.08644	0.354906	5.87883	4.13e-09	2.19e-07	UP
ENSMUSG00000016528	3041	1198	1900	1553	1991	1679	1217	1676	1270	Mapkapk2	42.9065	64.2884	50.0918	68.6182	55.6971	46.5907	58.137	40.0852	1540.49	0.136403	0.159765	0.853776	0.393229	0.60475	NOT
ENSMUSG00000016529	1310	4	2	5	4	5	3	9	6	Il10	0.332561	0.157092	0.374378	0.320017	0.385032	0.266609	0.724714	0.439619	4.61357	-0.139222	0.706014	-0.197194	0.843676	0.922196	NOT
ENSMUSG00000016534	9552	8377	6572	8821	6861	7358	8154	6750	9049	Lamp2	95.5162	70.7944	90.5806	75.2796	77.7076	99.3806	74.5426	90.9292	7779.3	-0.471788	0.12892	-3.65953	0.000252675	0.00249376	NOT
ENSMUSG00000016541	1937	1124	956	1436	1315	986	975	1212	1142	Atxn10	63.2004	50.7836	72.7171	71.1509	51.3506	58.6004	66.0037	56.5892	1131.12	-0.0693963	0.135111	-0.513623	0.607516	0.775055	NOT
ENSMUSG00000016552	5939	5	6	8	5	8	7	10	9	Foxred2	0.0916937	0.103952	0.132126	0.088235	0.135886	0.137218	0.177616	0.145454	7.16181	-0.286541	0.553549	-0.517644	0.604707	0.773234	NOT
ENSMUSG00000016554	4968	399	649	523	619	504	346	482	472	Eif3d	8.74731	13.4418	10.326	13.0585	10.234	8.10811	10.2344	9.11921	492.178	0.139671	0.165345	0.844721	0.398266	0.609052	NOT
ENSMUSG00000016559	2976	2177	4006	2688	3338	2214	2087	3045	2926	H3f3b	79.6725	138.508	88.5947	117.554	75.0486	81.6422	107.932	94.3709	2765.32	0.214458	0.165229	1.29794	0.194306	0.389241	NOT
ENSMUSG00000016619	4894	497	796	752	769	580	497	808	607	Nup50	11.0605	16.7357	15.0718	16.4682	11.9553	11.8227	17.4158	11.9048	649.963	0.242168	0.105819	2.28851	0.0221077	0.0837273	NOT
ENSMUSG00000016624	4264	5	8	9	7	10	7	14	4	Phf21b	0.127713	0.193049	0.207032	0.172054	0.236582	0.19112	0.346343	0.0900409	7.81405	0.24728	0.557271	0.443733	0.657236	0.807509	NOT
ENSMUSG00000016626	3537	0	0	0	0	0	0	0	0	Nlrp14	0	0	0	0	0	0	0	0	0	NA	NA	NA	NA	NA	NA
ENSMUSG00000016637	2864	60	51	49	58	60	45	54	53	Ift27	2.28171	1.83228	1.67816	2.12246	2.11337	1.82921	1.98891	1.77623	53.753	-0.320192	0.224477	-1.42639	0.153755	0.333101	NOT
ENSMUSG00000016664	4908	599	568	734	609	561	487	726	661	Pacsin2	13.2925	11.908	14.6691	13.0046	11.5307	11.5518	15.6037	12.9269	610.154	-0.0916558	0.108906	-0.841605	0.400009	0.610598	NOT
ENSMUSG00000016756	10660	2616	332	1632	1054	1985	1779	412	2072	Cmah	26.7278	3.20462	15.0167	10.3626	18.7846	19.4287	4.07695	18.6565	1543.89	-1.59718	0.516998	-3.08933	0.00200607	0.0128873	DOWN
ENSMUSG00000016757	4039	91	81	145	112	104	76	118	120	Ttll12	2.45386	2.06351	3.52132	2.90622	2.59751	2.19061	3.08179	2.8517	103.951	-0.0581091	0.194107	-0.299367	0.76466	0.875971	NOT
ENSMUSG00000016758	1591	72	54	47	56	75	89	30	93	Bik	4.92885	3.49236	2.89761	3.68894	4.75542	6.51246	1.98905	5.6106	66.4943	-1.08726	0.257651	-4.21991	2.44e-05	0.000357315	DOWN
ENSMUSG00000016763	9829	13	45	126	88	38	12	178	11	Scube1	0.144051	0.471084	1.2574	0.938334	0.390007	0.142134	1.91032	0.107419	57.9978	2.25479	0.42951	5.24968	1.52e-07	4.89e-06	UP
ENSMUSG00000016831	6950	475	649	660	663	477	468	771	578	Tox4	7.44375	9.6085	9.31474	9.998	6.9236	7.83946	11.7021	7.98252	581.202	0.175176	0.1055	1.66043	0.0968278	0.244163	NOT
ENSMUSG00000016833	1076	79	91	116	110	87	72	99	107	Mrps18c	7.99646	8.70211	10.5744	10.7143	8.15652	7.79014	9.70551	9.54483	93.6603	-0.00487735	0.179849	-0.0271192	0.978365	0.988628	NOT
ENSMUSG00000016918	11294	24	21	37	13	7	12	27	16	Sulf1	0.231444	0.191323	0.321341	0.120637	0.0625242	0.123697	0.25218	0.135978	19.0201	0.427822	0.446226	0.958756	0.337682	0.550459	NOT
ENSMUSG00000016921	4810	1119	1582	1752	1536	1453	1059	1792	1427	Srsf6	25.3377	33.8421	35.7273	33.468	30.4732	25.6316	39.2996	28.4758	1436.06	0.120886	0.0986652	1.22521	0.220494	0.422132	NOT
ENSMUSG00000016933	7857	584	456	537	419	616	469	445	680	Plcg1	8.09541	5.97178	6.70392	5.5891	7.90901	6.9493	5.97446	8.30709	528.366	-0.614038	0.121771	-5.04255	4.59e-07	1.26e-05	DOWN
ENSMUSG00000016940	3009	217	207	260	231	282	197	235	226	Kctd2	7.85454	7.07854	8.47545	8.04589	9.4542	7.62201	8.23836	7.20913	230.731	-0.264674	0.143998	-1.83804	0.0660569	0.186394	NOT
ENSMUSG00000016942	3359	4317	4027	4360	4049	5810	4607	3280	5631	Tmprss6	139.976	123.358	127.317	126.335	174.487	159.674	103.005	160.906	4552.63	-0.643858	0.138336	-4.65432	3.25e-06	6.51e-05	DOWN
ENSMUSG00000016946	3730	76	127	116	125	90	83	156	80	Kctd5	2.21916	3.50341	3.05043	3.51225	2.43406	2.59057	4.41175	2.05863	104.06	0.384435	0.179412	2.14275	0.0321331	0.110878	NOT
ENSMUSG00000016982	3534	0	0	0	0	0	0	0	0	Pom121l2	0	0	0	0	0	0	0	0	0	NA	NA	NA	NA	NA	NA
ENSMUSG00000016984	4185	24	47	70	85	23	40	96	46	Etaa1	0.624595	1.15557	1.64064	2.12867	0.554409	1.11273	2.41975	1.05502	51.4685	0.872136	0.299662	2.9104	0.00360969	0.0204946	UP
ENSMUSG00000016995	5174	0	0	3	0	1	0	0	0	Matn4	0	0	0.056873	0	0.0194972	0	0	0	0.45589	0.975478	2.7945	0.349071	0.727036	NA	NOT
ENSMUSG00000016998	731	0	0	0	0	0	0	0	0	Svs4	0	0	0	0	0	0	0	0	0	NA	NA	NA	NA	NA	NA
ENSMUSG00000017000	535	0	0	0	0	0	0	0	0	Svs6	0	0	0	0	0	0	0	0	0	NA	NA	NA	NA	NA	NA
ENSMUSG00000017002	1180	15	102	85	89	19	19	141	7	Slpi	1.3845	8.89434	7.06559	7.90482	1.62431	1.87455	12.6047	0.569394	55.0957	2.49356	0.318335	7.83313	4.76e-15	1.36e-12	UP
ENSMUSG00000017003	1200	0	0	0	0	0	0	0	0	Svs3a	0	0	0	0	0	0	0	0	0	NA	NA	NA	NA	NA	NA
ENSMUSG00000017004	646	0	0	0	0	0	0	0	0	Svs5	0	0	0	0	0	0	0	0	0	NA	NA	NA	NA	NA	NA
ENSMUSG00000017007	5732	0	0	0	1	0	0	0	2	Rbpjl	0	0	0	0.0182843	0	0	0	0.0334904	0.363004	-0.947879	2.98465	-0.317584	0.7508	NA	NOT
ENSMUSG00000017009	2547	2915	3310	2370	2453	3689	3117	1945	4043	Sdc4	124.65	133.719	91.2706	100.938	146.109	142.473	80.5538	152.36	3022.05	-0.707239	0.185839	-3.80565	0.000141434	0.00155218	DOWN
ENSMUSG00000017049	1115	0	0	0	0	0	0	0	0	Ccdc70	0	0	0	0	0	0	0	0	0	NA	NA	NA	NA	NA	NA
ENSMUSG00000017057	3712	380	389	341	270	288	343	419	465	Il13ra1	11.1496	10.7829	9.01069	7.62325	7.82677	10.7575	11.907	12.0238	360.928	-0.3391	0.175657	-1.93047	0.0535492	0.160362	NOT
ENSMUSG00000017064	1061	0	0	0	0	0	0	0	0	Prl5a1	0	0	0	0	0	0	0	0	0	NA	NA	NA	NA	NA	NA
ENSMUSG00000017119	6871	3248	2373	3803	2700	3033	3293	2912	3766	Nbr1	51.4848	35.5364	54.2898	41.184	44.5298	55.7952	44.7061	52.6087	3147.24	-0.47037	0.139252	-3.37782	0.000730617	0.00583421	NOT
ENSMUSG00000017132	3905	576	766	482	595	660	501	490	752	Cyth1	16.0651	20.1838	12.107	15.9691	17.0499	14.9363	13.2364	18.4839	603.737	-0.347172	0.190827	-1.81931	0.0688645	0.191971	NOT
ENSMUSG00000017144	4432	276	538	545	603	280	232	797	275	Rnd3	6.78254	12.4904	12.0617	14.2594	6.37318	6.09415	18.9694	5.95566	423.406	0.935663	0.141639	6.60599	3.95e-11	3.94e-09	UP
ENSMUSG00000017146	8533	16	64	38	27	38	39	42	41	Brca1	0.204221	0.771745	0.436811	0.331624	0.449242	0.532094	0.51921	0.461189	37.6885	0.0829885	0.358667	0.231381	0.817019	0.90686	NOT
ENSMUSG00000017165	460	0	0	0	0	0	0	0	0	Gast	0	0	0	0	0	0	0	0	0	NA	NA	NA	NA	NA	NA
ENSMUSG00000017167	5875	604	360	1105	470	656	512	411	522	Cntnap1	11.1973	6.30507	18.4487	8.38444	11.264	10.1458	7.37954	8.52824	575.912	-0.269359	0.28441	-0.947081	0.343597	0.557086	NOT
ENSMUSG00000017176	3420	42	66	93	80	44	35	116	49	Nt5c3b	1.33754	1.9857	2.66728	2.45159	1.29785	1.19143	3.57789	1.3752	62.6774	0.774088	0.222076	3.48569	0.000490876	0.00424699	UP
ENSMUSG00000017188	886	309	325	408	460	375	228	354	305	Coa3	37.9846	37.7438	45.1687	54.4137	42.6968	29.9589	42.1468	33.0417	340.134	0.0730935	0.16954	0.43113	0.666374	0.813872	NOT
ENSMUSG00000017195	1683	6	0	3	1	1	2	1	0	Zpbp2	0.388285	0	0.174843	0.0622731	0.0599396	0.138347	0.0626774	0	1.83806	-1.20492	1.32789	-0.907397	0.364197	NA	NOT
ENSMUSG00000017204	2726	0	0	0	0	0	0	0	0	Gsdma	0	0	0	0	0	0	0	0	0	NA	NA	NA	NA	NA	NA
ENSMUSG00000017210	6528	236	228	298	271	245	220	311	310	Med24	3.93745	3.59377	4.47762	4.35084	3.78603	3.92345	5.02546	4.55804	261.657	-0.148995	0.129652	-1.14919	0.250477	0.457077	NOT
ENSMUSG00000017211	3083	0	0	0	0	0	0	0	0	Gsdma2	0	0	0	0	0	0	0	0	0	NA	NA	NA	NA	NA	NA
ENSMUSG00000017221	4967	1611	1642	1670	1529	1845	1552	1505	1997	Psmd3	35.3252	34.0153	32.9787	32.2625	37.4714	36.3767	31.9623	38.5905	1670.83	-0.416102	0.103578	-4.01726	5.89e-05	0.000751906	NOT
ENSMUSG00000017264	3594	265	474	425	446	318	277	486	365	Exosc10	8.03065	13.5705	11.5991	13.0059	8.9258	8.97278	14.2644	9.74791	373.197	0.305888	0.125302	2.4412	0.0146385	0.0614164	NOT
ENSMUSG00000017286	6005	313	280	394	376	296	331	366	432	Glod4	5.67694	4.79778	6.43569	6.56235	4.97252	6.41712	6.42929	6.90506	346.053	-0.236848	0.149205	-1.5874	0.112422	0.270304	NOT
ENSMUSG00000017288	5203	399	343	434	345	436	401	365	481	Vps53	8.35222	6.78322	8.18177	6.94944	8.45339	8.97255	7.40004	8.87336	401.658	-0.489939	0.116915	-4.19057	2.78e-05	0.00039953	NOT
ENSMUSG00000017291	12421	1004	1074	1261	1058	782	851	1352	949	Taok1	8.8036	8.89699	9.95795	8.92716	6.35109	7.97624	11.4819	7.33342	1024.21	0.11066	0.126277	0.876326	0.380853	0.592911	NOT
ENSMUSG00000017299	2122	103	162	123	150	139	107	152	83	Dnttip1	5.28658	7.85534	5.68553	7.4085	6.60796	5.87035	7.55603	3.75431	125.92	0.158165	0.213415	0.741116	0.458623	0.660149	NOT
ENSMUSG00000017300	800	0	0	0	0	0	0	0	0	Tnnc2	0	0	0	0	0	0	0	0	0	NA	NA	NA	NA	NA	NA
ENSMUSG00000017307	1997	307	339	362	331	369	257	288	327	Acot8	16.7434	17.467	17.7804	17.3714	18.64	14.9824	15.2128	15.7169	320.866	-0.20569	0.146089	-1.40798	0.159138	0.341194	NOT
ENSMUSG00000017309	2737	187	360	391	303	225	238	316	312	Cd300lg	7.44132	13.5339	14.0124	11.6025	8.29289	10.1234	12.1789	10.9415	285.366	0.236426	0.165554	1.42809	0.153265	0.332509	NOT
ENSMUSG00000017310	751	0	0	0	0	0	0	0	0	Spint4	0	0	0	0	0	0	0	0	0	NA	NA	NA	NA	NA	NA
ENSMUSG00000017311	631	0	0	0	0	0	0	0	0	Pyy	0	0	0	0	0	0	0	0	0	NA	NA	NA	NA	NA	NA
ENSMUSG00000017314	4807	4	11	18	13	5	3	23	9	Mpp2	0.0906294	0.235458	0.367291	0.283435	0.104929	0.0726561	0.504718	0.179707	9.99288	1.35115	0.525145	2.57291	0.0100848	0.0464243	UP
ENSMUSG00000017316	500	0	0	0	0	0	0	0	0	Ppy	0	0	0	0	0	0	0	0	0	NA	NA	NA	NA	NA	NA
ENSMUSG00000017344	2030	15920	17397	14816	16084	18626	15986	12039	18996	Vtn	854.142	881.808	715.89	830.39	925.596	916.788	625.59	898.179	16351	-0.470673	0.154514	-3.04615	0.00231793	0.0144922	NOT
ENSMUSG00000017376	5447	188	166	211	189	158	150	196	185	Nlk	3.7591	3.13578	3.79959	3.63654	2.92616	3.20597	3.79572	3.25995	178.782	-0.122734	0.146273	-0.839076	0.401426	0.611941	NOT
ENSMUSG00000017386	3292	434	487	561	689	581	458	581	475	Traf4	14.3586	15.2218	16.7153	21.9353	17.8039	16.1969	18.6171	13.8494	527.869	-0.030182	0.151079	-0.199777	0.841655	0.921497	NOT
ENSMUSG00000017390	3263	128	101	76	64	129	124	113	111	Aldoc	4.27244	3.18493	2.28459	2.05564	3.98814	4.42415	3.65306	3.26515	107.552	-0.768375	0.213653	-3.59637	0.000322694	0.00304061	DOWN
ENSMUSG00000017400	3139	4	0	0	1	0	2	2	2	Stac2	0.138788	0	0	0.0333882	0	0.0741761	0.06721	0.0611555	1.44692	-1.7454	1.4777	-1.18116	0.237539	NA	NOT
ENSMUSG00000017404	1022	1712	2379	1941	2544	2023	1640	2533	1797	Rpl19	182.447	239.518	186.289	260.886	199.684	186.818	261.445	168.77	2042.61	0.111907	0.134545	0.831745	0.405553	0.615394	NOT
ENSMUSG00000017405	5222	82	70	86	77	101	63	98	92	Nek8	1.71025	1.37929	1.61537	1.54539	1.95111	1.40452	1.97963	1.69102	82.9403	-0.310602	0.189965	-1.63505	0.102038	0.253248	NOT
ENSMUSG00000017412	8963	21	9	14	24	14	10	11	15	Cacnb4	0.255181	0.10332	0.15321	0.280635	0.15757	0.129889	0.12946	0.160633	14.7769	-0.323657	0.451964	-0.716113	0.473922	0.672616	NOT
ENSMUSG00000017417	4836	16	13	18	21	17	10	7	16	Plxdc1	0.360344	0.2766	0.365088	0.455111	0.354618	0.240735	0.152689	0.317563	14.7298	-0.263598	0.441568	-0.596959	0.550535	0.731371	NOT
ENSMUSG00000017418	10428	594	666	644	557	511	542	798	631	Arl5b	6.20395	6.57156	6.05754	5.59807	4.94331	6.05095	8.0723	5.80798	611.115	-0.0623895	0.131311	-0.475127	0.634697	0.792407	NOT
ENSMUSG00000017421	6658	1057	1009	1592	1172	952	1085	1423	1285	Zfp207	17.2908	15.5935	23.4537	18.4488	14.4242	18.9719	22.5453	18.5249	1179.91	-0.0466538	0.141434	-0.329863	0.741504	0.862465	NOT
ENSMUSG00000017428	6383	1541	1279	1798	1645	1398	1126	1634	1551	Psmd11	26.2943	20.6177	27.6297	27.01	22.0943	20.5371	27.0036	23.323	1479.03	-0.1039	0.12427	-0.836083	0.403108	0.613506	NOT
ENSMUSG00000017446	3131	264	447	462	436	409	294	451	408	C1qtnf1	9.18341	14.6899	14.4734	14.5944	13.1777	10.9317	15.1946	12.5076	388.826	0.115436	0.14031	0.82272	0.410667	0.619432	NOT
ENSMUSG00000017453	2470	1809	1803	1985	1911	1891	1791	1859	2735	Pipox	79.7672	75.1094	78.827	81.0864	77.2312	84.4158	79.3922	106.281	1967.54	-0.39143	0.123871	-3.15999	0.00157776	0.0106471	NOT
ENSMUSG00000017466	3896	244	424	734	595	256	232	976	211	Timp2	6.82109	11.198	18.4794	16.006	6.62856	6.93257	26.4257	5.19829	432.163	1.22109	0.203989	5.98609	2.15e-09	1.24e-07	UP
ENSMUSG00000017478	9190	573	717	758	728	747	548	706	727	Zc3h18	6.79082	8.02785	8.09031	8.30233	8.1998	6.94209	8.10372	7.59304	680.942	-0.107717	0.114408	-0.94152	0.346438	0.5597	NOT
ENSMUSG00000017485	14613	938	719	879	718	739	853	934	889	Top2b	6.99112	5.06273	5.90012	5.14955	5.10156	6.79571	6.74222	5.83928	834.306	-0.37	0.133574	-2.77	0.00560564	0.0292462	NOT
ENSMUSG00000017491	5265	32	49	68	37	38	30	67	27	Rarb	0.661964	0.95762	1.26684	0.736525	0.728087	0.663358	1.34237	0.492223	42.0768	0.502314	0.273292	1.83801	0.0660613	0.186394	NOT
ENSMUSG00000017493	4416	12714	12371	10249	12421	15847	12565	8638	14421	Igfbp4	313.571	288.251	227.648	294.789	362.006	331.252	206.338	313.446	12556.4	-0.611901	0.165215	-3.70366	0.00021251	0.00216714	DOWN
ENSMUSG00000017499	5229	3	7	10	5	1	1	11	4	Cdc6	0.0624864	0.137745	0.187583	0.100216	0.0192921	0.0222642	0.221906	0.073424	4.86431	1.59254	0.75402	2.11207	0.0346805	0.117297	UP
ENSMUSG00000017548	4945	419	538	559	481	381	416	658	482	Suz12	9.22849	11.1947	11.0881	10.1944	7.77243	9.79382	14.0364	9.35573	483.31	0.108777	0.125223	0.868666	0.38503	0.596885	NOT
ENSMUSG00000017550	7532	34	48	33	44	17	48	52	35	Atad5	0.491645	0.655732	0.429749	0.612247	0.227686	0.741918	0.728263	0.44602	38.6929	0.100525	0.340285	0.295414	0.767678	0.877398	NOT
ENSMUSG00000017561	4261	153	203	223	182	157	156	226	189	Crlf3	3.91078	4.90208	5.1334	4.47656	3.71695	4.26224	5.5949	4.25743	183.154	0.0654135	0.138117	0.473608	0.635779	0.793048	NOT
ENSMUSG00000017588	1550	0	0	0	0	0	0	0	0	Krt27	0	0	0	0	0	0	0	0	0	NA	NA	NA	NA	NA	NA
ENSMUSG00000017607	5167	8	10	16	34	10	5	16	5	Tns4	0.16863	0.199139	0.303734	0.689644	0.195236	0.112657	0.326646	0.0928813	12.4424	1.16541	0.53083	2.19545	0.0281314	0.100298	UP
ENSMUSG00000017615	3781	557	593	857	771	618	464	731	614	Tnfaip1	16.0447	16.1378	22.2324	21.3713	16.4885	14.2869	20.3942	15.5869	638.304	0.109344	0.126087	0.867211	0.385826	0.597673	NOT
ENSMUSG00000017631	10974	135	338	250	275	176	113	408	158	Abr	1.33984	3.16918	2.23453	2.62635	1.61788	1.19878	3.92185	1.38194	221.862	0.850901	0.183894	4.62713	3.71e-06	7.29e-05	UP
ENSMUSG00000017639	7451	162	341	240	217	357	180	315	256	Rab11fip4	2.36801	4.70907	3.15943	3.05232	4.83339	2.81244	4.45955	3.29778	254.595	-0.0412273	0.234751	-0.175622	0.860591	0.932026	NOT
ENSMUSG00000017652	3406	13	22	21	15	12	8	26	8	Cd40	0.415702	0.66462	0.604764	0.461563	0.355414	0.273445	0.805237	0.225446	15.0424	0.744932	0.40993	1.81722	0.0691839	0.192416	NOT
ENSMUSG00000017664	3914	269	303	365	323	271	285	351	346	Slc35c2	7.48539	7.96558	9.1471	8.649	6.98468	8.47714	9.45979	8.48501	310.754	-0.0864725	0.12344	-0.700523	0.483601	0.679678	NOT
ENSMUSG00000017667	8205	52	89	87	57	64	44	107	54	Zfp334	0.690252	1.11611	1.04005	0.728082	0.786864	0.624309	1.37563	0.631702	67.2175	0.382319	0.229141	1.66849	0.0952191	0.241406	NOT
ENSMUSG00000017670	6652	224	264	352	285	248	221	339	249	Elmo2	3.66757	4.08364	5.19041	4.49032	3.76095	3.86781	5.37579	3.59289	267.773	0.108853	0.12505	0.870474	0.384042	0.595839	NOT
ENSMUSG00000017677	3987	533	532	421	393	337	407	550	401	Wsb1	14.5601	13.7297	10.3573	10.3307	8.52672	11.8843	14.5516	9.65373	445.185	-0.118092	0.192357	-0.613922	0.539267	0.723645	NOT
ENSMUSG00000017679	5951	269	262	391	372	448	210	294	342	Ttpal	4.92318	4.53009	6.44464	6.55145	7.59427	4.10823	5.21138	5.51611	319.766	-0.209601	0.205485	-1.02003	0.307715	0.520903	NOT
ENSMUSG00000017686	7414	590	634	754	637	515	554	746	680	Rhot1	8.66727	8.79898	9.9754	9.00474	7.00733	8.69926	10.6141	8.80346	630.936	-0.0412681	0.114604	-0.360093	0.718777	0.847785	NOT
ENSMUSG00000017688	2630	10	4	5	4	2	4	13	6	Hnf4g	0.414121	0.156495	0.186477	0.1594	0.0767136	0.177064	0.521414	0.218974	5.88422	-0.0737882	0.699883	-0.105429	0.916035	0.959535	NOT
ENSMUSG00000017692	4734	3	10	11	10	2	0	11	3	Rhbdl3	0.0690202	0.217354	0.227917	0.221389	0.0426187	0	0.245109	0.0608261	5.77996	2.12439	0.72841	2.91648	0.00354007	0.0202257	UP
ENSMUSG00000017697	2002	26	32	31	35	23	21	37	30	Ada	1.41447	1.64468	1.51883	1.83226	1.15894	1.22118	1.94954	1.43832	28.8215	0.154759	0.284846	0.543308	0.586918	0.760116	NOT
ENSMUSG00000017707	3840	4084	6430	5453	5589	4129	4471	6512	4783	Serinc3	115.834	172.296	139.289	152.541	108.471	135.55	178.887	119.555	5100.03	0.173977	0.122425	1.42109	0.15529	0.335387	NOT
ENSMUSG00000017713	2910	101	91	110	74	132	103	87	116	Tha1	3.78017	3.21769	3.70776	2.66516	4.57593	4.12069	3.15371	3.82615	102.434	-0.602523	0.184281	-3.26959	0.00107703	0.0079282	DOWN
ENSMUSG00000017715	5333	119	232	218	237	174	98	233	130	Pgs1	2.43029	4.47622	4.00956	4.65759	3.29136	2.13934	4.60871	2.33975	174.606	0.548961	0.17362	3.16186	0.00156764	0.0105957	UP
ENSMUSG00000017716	3402	19	86	110	73	33	13	167	28	Birc5	0.608278	2.60112	3.17154	2.24891	0.978538	0.444871	5.17818	0.789988	60.7541	1.9443	0.306962	6.33403	2.39e-10	1.9e-08	UP
ENSMUSG00000017718	3539	400	230	229	178	277	455	163	649	Afmid	12.3101	6.68718	6.34697	5.27137	7.89582	14.9677	4.8585	17.602	333.214	-1.424	0.236051	-6.03258	1.61e-09	9.71e-08	DOWN
ENSMUSG00000017720	934	1	1	2	4	1	1	0	4	Trp53tg5	0.11661	0.110166	0.210036	0.448846	0.108007	0.124646	0	0.411065	1.72581	-0.222309	1.2175	-0.182594	0.855116	NA	NOT
ENSMUSG00000017721	3856	691	653	795	658	627	646	810	776	Pigt	19.5175	17.425	20.2228	17.8843	16.4032	19.5039	22.1586	19.3162	701.794	-0.197956	0.108638	-1.82216	0.0684305	0.191267	NOT
ENSMUSG00000017723	1140	12	17	23	27	29	26	32	22	Wfdc2	1.14646	1.5344	1.97895	2.48224	2.5662	2.65518	2.96101	1.85231	23.2613	-0.13786	0.36012	-0.382818	0.701855	0.837427	NOT
ENSMUSG00000017724	3104	2	5	14	4	1	4	13	1	Etv4	0.0701764	0.165746	0.442403	0.135059	0.0324995	0.150025	0.441791	0.0309225	5.09426	1.83052	0.812676	2.25246	0.0242932	0.0897851	UP
ENSMUSG00000017733	778	0	0	0	0	0	1	0	0	Eppin	0	0	0	0	0	0.149639	0	0	0.15317	-1.0051	3.53381	-0.284424	0.776085	NA	NOT
ENSMUSG00000017734	4389	9	6	19	10	12	9	18	8	Dbndd2	0.223337	0.140663	0.424619	0.238791	0.275812	0.238727	0.432616	0.174953	11.0519	0.173975	0.488274	0.356307	0.721611	0.849455	NOT
ENSMUSG00000017737	3539	46	71	38	23	50	44	54	56	Mmp9	1.41566	2.0643	1.05321	0.681132	1.42524	1.44743	1.60956	1.51881	47.7703	-0.34893	0.318472	-1.09564	0.273236	0.48397	NOT
ENSMUSG00000017740	7447	39	35	30	42	36	29	33	32	Slc12a5	0.570383	0.483595	0.39514	0.591088	0.487662	0.453359	0.467442	0.412444	34.5171	-0.236652	0.278851	-0.848668	0.396066	0.606898	NOT
ENSMUSG00000017747	2692	154	112	154	159	181	144	151	196	Ghdc	6.23058	4.28093	5.61122	6.19022	6.78268	6.22748	5.91694	6.9884	156.489	-0.507725	0.155543	-3.26422	0.00109767	0.00805195	DOWN
ENSMUSG00000017754	2562	377	578	641	635	479	322	962	386	Pltp	16.0267	23.2137	24.5409	25.9764	18.8606	14.6319	39.6088	14.4612	527.551	0.558276	0.160913	3.46942	0.000521579	0.00446081	UP
ENSMUSG00000017756	12669	926	808	916	690	851	844	971	1216	Slc12a7	7.96071	6.56243	7.09193	5.70809	6.77619	7.75578	8.08485	9.21273	901.402	-0.462156	0.128585	-3.59417	0.000325426	0.00305952	NOT
ENSMUSG00000017760	4715	1857	2076	2193	1859	2069	1762	1972	2238	Ctsa	42.8956	45.3045	45.6214	41.3221	44.2667	43.506	44.1185	45.5591	1993.59	-0.245077	0.0981434	-2.49713	0.0125204	0.0546991	NOT
ENSMUSG00000017764	2781	36	62	45	52	37	33	51	48	Zswim1	1.40989	2.29396	1.58717	1.95969	1.34214	1.38146	1.93448	1.65667	44.7373	0.178023	0.249536	0.713417	0.475588	0.67364	NOT
ENSMUSG00000017765	4279	193	330	299	373	283	171	319	178	Slc12a4	4.91245	7.93537	6.85394	9.13589	6.67179	4.65242	7.864	3.99277	262.141	0.404887	0.187685	2.15727	0.0309846	0.107781	NOT
ENSMUSG00000017767	1138	0	0	0	1	0	1	2	1	Spata25	0	0	0	0.0920963	0	0.102302	0.185389	0.0843441	0.601776	0.281403	2.07485	0.135626	0.892117	NA	NOT
ENSMUSG00000017774	6585	649	833	1220	1053	1003	533	1338	660	Myo1c	10.7343	13.0162	18.1725	16.7593	15.3654	9.42316	21.4336	9.62022	882.989	0.357626	0.179083	1.99699	0.0458266	0.143736	NOT
ENSMUSG00000017776	4730	1061	969	1342	1369	1202	853	1422	870	Crk	24.4308	21.0794	27.8293	30.3338	25.6355	20.9949	31.7127	17.6545	1118.2	0.0645301	0.155172	0.415862	0.677511	0.821759	NOT
ENSMUSG00000017778	1131	1153	1480	1552	1568	1445	1180	1591	1653	Cox7c	111.032	134.646	134.599	145.301	128.885	121.463	148.389	140.284	1434.98	-0.0827259	0.104939	-0.788325	0.430506	0.637478	NOT
ENSMUSG00000017781	4129	660	854	1095	937	782	592	1044	732	Pitpna	17.4093	21.2818	26.0124	23.7837	19.1056	16.6918	26.6717	17.0162	818.083	0.223877	0.102613	2.18175	0.0291277	0.102979	NOT
ENSMUSG00000017801	1999	270	341	335	278	326	282	264	367	Mlx	14.7107	17.5524	16.4378	14.5753	16.4514	16.4233	13.9311	17.6218	307.258	-0.302263	0.151709	-1.99238	0.0463289	0.144698	NOT
ENSMUSG00000017802	3589	1115	993	1191	1172	1075	958	1068	1166	Retreg3	33.8364	28.4689	32.5499	34.2246	30.2157	31.0754	31.3901	31.1833	1088.08	-0.244474	0.107949	-2.26473	0.0235291	0.0876213	NOT
ENSMUSG00000017817	4255	1	3	2	2	1	0	5	1	Jph2	0.0255967	0.0725466	0.0461044	0.0492623	0.0237082	0	0.123955	0.0225578	1.73198	1.72339	1.23764	1.39249	0.163775	NA	NOT
ENSMUSG00000017830	3272	116	110	218	151	108	109	109	142	Dhx58	3.86125	3.45919	6.53514	4.83669	3.32973	3.87827	3.51405	4.16555	130.842	0.0256802	0.230345	0.111486	0.911231	0.957943	NOT
ENSMUSG00000017831	5270	597	566	746	639	536	490	724	698	Rab5a	12.3381	11.051	13.8848	12.7079	10.2601	10.8246	14.4918	12.7128	615.952	-0.0772258	0.116776	-0.661316	0.50841	0.699949	NOT
ENSMUSG00000017832	726	0	7	4	2	2	0	4	3	Hspb9	0	0.992103	0.540424	0.288721	0.277902	0	0.581191	0.396626	2.5628	1.54212	1.0832	1.42367	0.154543	NA	NOT
ENSMUSG00000017837	3578	197	318	347	368	280	233	433	280	Nkiras2	5.99665	9.14497	9.51263	10.7793	7.89434	7.58125	12.7656	7.51129	299.338	0.284722	0.13983	2.0362	0.0417302	0.134015	NOT
ENSMUSG00000017843	8286	758	830	1066	950	891	718	1021	956	Ppp2r5c	9.96339	10.3069	12.619	12.0161	10.8475	10.088	12.998	11.0741	886.255	-0.0610212	0.098181	-0.621517	0.534259	0.720481	NOT
ENSMUSG00000017858	2802	290	264	319	300	259	310	289	331	Ift52	11.2723	9.69463	11.1669	11.2212	9.32459	12.8801	10.8799	11.3385	295.298	-0.308969	0.14154	-2.1829	0.0290429	0.102722	NOT
ENSMUSG00000017861	4632	9	19	21	26	14	7	22	7	Mybl2	0.21162	0.422066	0.444695	0.588287	0.3049	0.175936	0.501013	0.145053	14.9759	0.971039	0.416907	2.32915	0.0198512	0.0777704	UP
ENSMUSG00000017868	3412	540	1083	1061	907	851	374	1060	629	Sgk2	17.2372	32.6599	30.5013	27.8601	25.1605	12.7611	32.7712	17.6945	786.246	0.516537	0.185953	2.77778	0.00547308	0.0286877	UP
ENSMUSG00000017897	2963	5	0	3	5	2	3	4	1	Eya2	0.18379	0	0.0993119	0.176857	0.0680921	0.117873	0.142404	0.032394	2.88647	-0.201118	0.975522	-0.206164	0.836663	NA	NOT
ENSMUSG00000017922	930	0	0	0	0	0	0	0	0	Prl3c1	0	0	0	0	0	0	0	0	0	NA	NA	NA	NA	NA	NA
ENSMUSG00000017929	4308	287	268	483	444	342	210	464	285	B4galt5	7.25587	6.4011	10.9972	10.8017	8.00845	5.67504	11.3615	6.34989	338.222	0.275713	0.183316	1.50403	0.132573	0.303144	NOT
ENSMUSG00000017943	2580	0	0	0	0	0	0	0	0	Gdap1l1	0	0	0	0	0	0	0	0	0	NA	NA	NA	NA	NA	NA
ENSMUSG00000017950	4828	6299	6736	7703	8133	9548	5583	7192	7758	Hnf4a	142.098	143.559	156.496	176.55	199.5	134.625	157.137	154.234	7314.61	-0.239949	0.14539	-1.65038	0.0988659	0.247745	NOT
ENSMUSG00000017969	2567	23	28	64	63	27	20	75	14	Ptgis	0.975854	1.12235	2.44549	2.57217	1.06105	0.907046	3.08199	0.523479	37.1405	1.14624	0.342925	3.34255	0.000830132	0.00646097	UP
ENSMUSG00000017978	9566	119	49	77	84	116	128	62	132	Cadps2	1.35488	0.527061	0.789536	0.920308	1.22328	1.55778	0.683686	1.32446	98.605	-1.15098	0.207209	-5.55467	2.78e-08	1.14e-06	DOWN
ENSMUSG00000017999	4817	209	380	339	359	375	237	351	284	Ddx27	4.72555	8.11713	6.90295	7.81092	7.85331	5.72792	7.68645	5.65899	311.703	0.101897	0.174666	0.58338	0.559637	0.738637	NOT
ENSMUSG00000018001	9437	118	180	203	191	141	109	282	155	Cyth3	1.36186	1.96261	2.10996	2.12121	1.50724	1.34468	3.15218	1.5765	166.641	0.427094	0.162729	2.62458	0.00867571	0.0413126	NOT
ENSMUSG00000018008	7552	117	189	280	278	159	93	339	137	Cyth4	1.68736	2.57511	3.6367	3.85804	2.1239	1.43366	4.73514	1.74123	189.797	0.818725	0.18551	4.41338	1.02e-05	0.000172322	UP
ENSMUSG00000018012	1293	8	14	17	26	8	5	18	7	Rac3	0.673867	1.1141	1.28962	2.10746	0.624151	0.450191	1.46848	0.519633	12.2831	1.14563	0.464381	2.467	0.0136251	0.0582793	UP
ENSMUSG00000018040	5411	163	326	241	281	236	149	249	193	Rrp7a	3.2809	6.1992	4.36869	5.44268	4.3998	3.20578	4.85419	3.42355	225.281	0.302452	0.185648	1.62917	0.103277	0.255533	NOT
ENSMUSG00000018042	4298	1752	2357	2577	2558	2313	1556	2181	2260	Cyb5r3	44.3967	56.4272	58.8111	62.3761	54.2884	42.1472	53.5284	50.4707	2161.48	0.0295575	0.129467	0.228302	0.819412	0.908201	NOT
ENSMUSG00000018068	10609	86	69	130	94	69	60	114	68	Ints2	0.882891	0.669222	1.20193	0.928619	0.656104	0.658419	1.13351	0.615221	84.1932	0.227343	0.221996	1.02408	0.305796	0.518801	NOT
ENSMUSG00000018076	15427	321	525	418	469	324	328	523	380	Med13l	2.26624	3.50165	2.6577	3.18622	2.11866	2.47524	3.57615	2.36428	403.586	0.237582	0.137653	1.72595	0.0843565	0.22184	NOT
ENSMUSG00000018102	1156	595	514	879	597	583	618	454	858	H2bc4	56.0586	45.751	74.5835	54.1254	50.8755	62.238	41.4279	71.2404	636.107	-0.395445	0.200164	-1.9756	0.0481999	0.149029	NOT
ENSMUSG00000018126	2728	0	1	0	2	0	1	4	0	Baiap2l2	0	0.0377182	0	0.0768369	0	0.0426757	0.154672	0	0.926136	2.22333	1.81137	1.22743	0.219661	NA	NOT
ENSMUSG00000018143	3901	189	450	411	660	257	219	493	271	Mafk	5.27678	11.8695	10.3342	17.7318	6.64592	6.53572	13.3311	6.66792	355.436	0.836659	0.185436	4.51184	6.43e-06	0.000116243	UP
ENSMUSG00000018160	8753	399	522	537	552	439	444	634	567	Med1	4.96477	6.13634	6.01768	6.60947	5.05948	5.90543	7.6406	6.2176	504.36	0.000118345	0.120867	0.000979136	0.999219	0.999515	NOT
ENSMUSG00000018166	6016	2598	2049	2719	2527	2317	3336	2243	3342	Erbb3	47.0343	35.0453	44.3316	44.0232	38.8523	64.557	39.3293	53.3207	2668.63	-0.572662	0.164862	-3.47358	0.000513561	0.0044034	DOWN
ENSMUSG00000018167	3557	132	199	182	218	204	155	210	178	Stard3	4.04178	5.75658	5.01879	6.42328	5.78555	5.0731	6.22774	4.80323	182.509	-0.000759939	0.164901	-0.00460845	0.996323	0.998215	NOT
ENSMUSG00000018168	8754	30	31	30	27	29	24	32	25	Ikzf3	0.373248	0.364377	0.336145	0.323252	0.334187	0.319176	0.385601	0.274113	28.3359	-0.132761	0.288526	-0.460136	0.645419	0.79934	NOT
ENSMUSG00000018169	2839	20	44	40	35	38	38	34	34	Mfng	0.767269	1.59471	1.38199	1.29207	1.35026	1.55827	1.26331	1.1495	35.1502	-0.044121	0.295783	-0.149167	0.881422	0.942894	NOT
ENSMUSG00000018171	3862	1928	2459	1905	1904	1978	1574	1913	1658	Vmp1	54.3723	65.5152	48.3832	51.6701	51.6669	47.448	52.2514	41.2068	1906.17	-0.0796376	0.157042	-0.507109	0.612078	0.777964	NOT
ENSMUSG00000018189	2921	127	144	174	139	159	136	173	159	Uchl5	4.73538	5.07255	5.84291	4.98732	5.49115	5.42042	6.24755	5.22471	149.957	-0.167164	0.146934	-1.13768	0.255255	0.46277	NOT
ENSMUSG00000018196	8772	237	175	184	234	231	198	198	206	Glrx2	2.94261	2.05274	2.05746	2.79577	2.65651	2.6278	2.38101	2.25406	208.975	-0.424171	0.163408	-2.59577	0.00943791	0.0440828	NOT
ENSMUSG00000018199	9541	77	99	127	121	61	76	163	82	Ro60	0.878982	1.06767	1.30563	1.32916	0.644962	0.927353	1.80214	0.82493	97.6138	0.489864	0.197037	2.48615	0.0129133	0.0558725	NOT
ENSMUSG00000018209	5860	339	349	422	424	328	323	473	349	Stk4	6.30065	6.12806	7.06361	7.5832	5.64643	6.41697	8.51449	5.71643	370.733	0.027517	0.121846	0.225835	0.82133	0.90931	NOT
ENSMUSG00000018211	572	2	1	0	0	1	1	6	0	Wfdc15b	0.380818	0.179887	0	0	0.176361	0.20353	1.1065	0	1.31532	0.431081	1.58068	0.272719	0.78507	NA	NOT
ENSMUSG00000018217	2354	65	98	144	120	71	64	197	82	Pmp22	3.00739	4.28366	6.00023	5.34268	3.04264	3.16518	8.82785	3.34352	100.523	0.693049	0.208813	3.319	0.000903406	0.006919	UP
ENSMUSG00000018238	2031	0	3	9	4	4	0	5	3	Gdf9	0	0.151987	0.434654	0.206412	0.198677	0	0.25969	0.141778	3.2219	1.33312	0.979038	1.36166	0.173304	0.361022	NOT
ENSMUSG00000018239	1391	41	34	61	51	35	38	65	40	Zcchc10	3.21026	2.51505	4.30144	3.84262	2.53828	3.1804	4.92926	2.76013	44.6501	0.157562	0.256546	0.614164	0.539107	0.723603	NOT
ENSMUSG00000018259	939	0	0	0	0	0	0	0	0	Prl8a2	0	0	0	0	0	0	0	0	0	NA	NA	NA	NA	NA	NA
ENSMUSG00000018263	4675	0	0	0	0	0	0	0	0	Tbx5	0	0	0	0	0	0	0	0	0	NA	NA	NA	NA	NA	NA
ENSMUSG00000018286	1872	716	936	884	1035	1014	650	762	893	Psmb6	41.6572	51.4476	46.3189	57.9454	54.6425	40.4234	42.9383	45.787	854.534	-0.11762	0.162146	-0.725397	0.468208	0.667958	NOT
ENSMUSG00000018287	1480	147	173	206	161	186	168	182	219	Spag7	10.8178	12.0276	13.6527	11.4011	12.678	13.2152	12.9719	14.203	179.114	-0.274174	0.149206	-1.83755	0.0661285	0.186503	NOT
ENSMUSG00000018293	2405	1373	2010	1939	2443	1912	1261	1980	1629	Pfn1	62.1782	85.9956	79.0814	106.462	80.1994	61.0415	86.8451	65.0134	1786.74	0.171654	0.146715	1.16998	0.242007	0.447757	NOT
ENSMUSG00000018322	3040	106	210	177	197	115	145	229	178	Tomm34	3.79765	7.1079	5.71099	6.79168	3.81612	5.5529	7.94616	5.62009	165.853	0.30181	0.186942	1.61446	0.106427	0.260225	NOT
ENSMUSG00000018326	3382	1044	1156	1598	1333	1087	864	1576	1093	Ywhab	33.6209	35.1706	46.3463	41.3086	32.4231	29.7417	49.1561	31.0201	1191.76	0.183352	0.106917	1.71489	0.0863648	0.225924	NOT
ENSMUSG00000018334	7103	41	89	80	66	50	47	104	59	Ksr1	0.628673	1.28927	1.10474	0.973837	0.710111	0.770338	1.5445	0.797273	64.8714	0.501259	0.217769	2.30179	0.0213472	0.0816728	UP
ENSMUSG00000018339	1813	156	277	432	286	130	165	709	195	Gpx3	9.37151	15.7209	23.3721	16.533	7.23342	10.5953	41.2519	10.3237	276.216	1.08622	0.251299	4.32242	1.54e-05	0.000245196	UP
ENSMUSG00000018340	2930	1414	1020	1722	1309	1313	1243	1577	1493	Anxa6	52.5611	35.8202	57.6471	46.8227	45.2059	49.3888	56.7753	48.909	1375.52	-0.251477	0.138119	-1.82073	0.0686483	0.191622	NOT
ENSMUSG00000018341	3794	4	2	6	8	3	1	9	2	Il12rb2	0.114827	0.0542411	0.155119	0.220992	0.0797668	0.0306851	0.250231	0.0505976	4.13218	1.02738	0.79923	1.28546	0.19863	0.394475	NOT
ENSMUSG00000018347	2371	59	98	67	85	80	56	78	74	Zkscan6	2.71021	4.25295	2.77175	3.75726	3.40374	2.74968	3.47023	2.99569	73.8164	0.0193055	0.220247	0.0876537	0.930152	0.966383	NOT
ENSMUSG00000018362	2873	582	1351	1177	982	668	433	1236	689	Kpna2	22.0633	48.3855	40.1839	35.8228	23.4552	17.546	45.3814	23.0187	856.648	0.733078	0.146308	5.01052	5.43e-07	1.44e-05	UP
ENSMUSG00000018363	6162	769	762	772	736	722	673	832	782	Smurf2	13.5921	12.7241	12.2887	12.5182	11.8199	12.7151	14.2428	12.181	752.459	-0.209388	0.101521	-2.06252	0.0391584	0.127822	NOT
ENSMUSG00000018372	4199	61	69	84	74	58	63	80	87	Cep95	1.58222	1.69083	1.96221	1.84701	1.39341	1.74671	2.00974	1.9887	71.1106	-0.0889482	0.199531	-0.445787	0.655751	0.806449	NOT
ENSMUSG00000018377	4601	248	340	366	312	226	234	470	327	Vezf1	5.8706	7.60365	7.80262	7.107	4.95512	5.92092	10.7756	6.8217	307.379	0.239016	0.148814	1.60615	0.108242	0.263219	NOT
ENSMUSG00000018378	5779	43	67	74	68	53	29	124	53	2210416O15Rik	0.810399	1.19294	1.256	1.23322	0.925169	0.584212	2.26342	0.880278	61.0649	0.62055	0.254959	2.43392	0.0149362	0.0625075	UP
ENSMUSG00000018378	5779	43	67	74	68	53	29	124	53	Cuedc1	0.810399	1.19294	1.256	1.23322	0.925169	0.584212	2.26342	0.880278	61.0649	0.62055	0.254959	2.43392	0.0149362	0.0625075	UP
ENSMUSG00000018379	5710	892	953	1370	1024	915	838	1298	999	Srsf1	17.0142	17.1732	23.534	18.7952	16.1653	17.0857	23.9792	16.7929	1017.44	0.0596094	0.113161	0.526767	0.598355	0.768845	NOT
ENSMUSG00000018381	4153	26	33	61	53	41	18	67	24	Abi3	0.681859	0.817612	1.44072	1.33751	0.99591	0.504587	1.7018	0.554685	38.6022	0.685401	0.306706	2.23471	0.0254362	0.0930508	UP
ENSMUSG00000018387	4600	315	418	266	316	386	301	330	527	Shroom1	7.45823	9.35005	5.67199	7.19969	8.46501	7.61788	7.56748	10.9964	357.307	-0.454307	0.193593	-2.34671	0.0189398	0.0749983	NOT
ENSMUSG00000018395	3586	54	58	63	46	40	46	91	49	Kif3a	1.64009	1.66423	1.72322	1.34441	1.12525	1.49339	2.67686	1.31154	54.7279	0.150263	0.251006	0.598645	0.549409	0.730797	NOT
ENSMUSG00000018398	6087	82	115	172	127	103	83	225	75	2022-09-08	1.46721	1.94397	2.77164	2.18668	1.70699	1.58745	3.89919	1.18265	118.032	0.593233	0.217403	2.72873	0.00635788	0.032233	UP
ENSMUSG00000018401	6240	928	754	869	702	929	825	724	1275	Mtmr4	16.1974	12.4332	13.6599	11.7906	15.0186	15.392	12.2391	19.612	880.363	-0.647119	0.127134	-5.09007	3.58e-07	1.02e-05	DOWN
ENSMUSG00000018405	2868	30	45	49	51	38	39	30	60	Mrm1	1.13927	1.61447	1.67582	1.8637	1.3366	1.58311	1.10341	2.00802	42.476	-0.193886	0.29007	-0.668411	0.503871	0.696438	NOT
ENSMUSG00000018411	7531	21	18	38	36	26	35	35	43	Mapt	0.303703	0.245932	0.494929	0.500996	0.348272	0.541054	0.490242	0.548041	31.215	-0.263904	0.326745	-0.807675	0.419278	0.626797	NOT
ENSMUSG00000018412	6874	388	557	629	545	435	397	696	505	Kansl1	6.14759	8.3376	8.97538	8.30943	6.38378	6.72367	10.6806	7.05145	507.275	0.209685	0.106266	1.9732	0.0484724	0.149679	NOT
ENSMUSG00000018415	4864	326	262	332	321	335	301	281	389	Gid4	7.29973	5.54247	6.69508	6.91665	6.94783	7.20441	6.09408	7.67632	318.967	-0.454011	0.129101	-3.5167	0.000436942	0.00386845	NOT
ENSMUSG00000018417	10792	2309	1953	1888	1520	2008	2399	1776	2948	Myo1b	23.3026	18.6207	17.1598	14.7613	18.7698	25.8794	17.3595	26.2194	2126.38	-0.717145	0.142947	-5.01685	5.25e-07	1.4e-05	DOWN
ENSMUSG00000018425	4233	467	444	576	503	385	497	549	558	Dhx40	12.0158	10.7927	13.3471	12.4539	9.17509	13.6689	13.681	12.6527	494.096	-0.170612	0.143827	-1.18623	0.235531	0.439538	NOT
ENSMUSG00000018427	4847	308	208	469	501	281	361	435	444	Ypel2	6.92087	4.41556	9.49099	10.833	5.84832	8.67081	9.46698	8.79239	370.721	-0.0808945	0.236257	-0.3424	0.73205	0.856123	NOT
ENSMUSG00000018428	4390	1497	1724	1534	1525	1686	1471	1339	1801	Akap1	37.1399	40.4081	34.2746	36.4074	38.7428	39.0098	32.1745	39.3773	1574.69	-0.346452	0.132419	-2.61633	0.00888805	0.0420387	NOT
ENSMUSG00000018433	5357	155	219	294	222	172	198	335	196	Nol11	3.15132	4.20647	5.38316	4.34326	3.23895	4.30297	6.59657	3.51181	218.373	0.271461	0.166177	1.63356	0.102351	0.253725	NOT
ENSMUSG00000018442	8049	698	515	589	717	631	623	621	750	Derl2	9.44488	6.58356	7.17769	9.33601	7.90834	9.01097	8.13851	8.94368	644.906	-0.42731	0.13533	-3.15755	0.00159102	0.0107187	NOT
ENSMUSG00000018446	2826	662	1059	794	1021	792	617	968	780	C1qbp	25.5134	38.5584	27.5588	37.865	28.2716	25.4178	36.1325	26.4923	823.662	0.161489	0.143132	1.12826	0.259212	0.467427	NOT
ENSMUSG00000018449	2842	142	136	130	112	138	144	134	161	Rpain	5.44186	4.92391	4.48674	4.13027	4.89839	5.8988	4.97366	5.43749	137.834	-0.475515	0.157571	-3.01777	0.00254638	0.0156014	NOT
ENSMUSG00000018451	1573	0	2	1	2	2	1	2	0	6330403K07Rik	0	0.130827	0.0623567	0.133256	0.128262	0.074011	0.134121	0	1.21039	0.938572	1.42097	0.660513	0.508925	NA	NOT
ENSMUSG00000018459	5215	163	300	338	215	209	146	370	243	Slc13a3	3.40421	5.91919	6.35732	4.32084	4.04287	3.2593	7.48415	4.47248	239.563	0.408007	0.175306	2.3274	0.0199443	0.0779143	NOT
ENSMUSG00000018470	2865	7	12	7	6	7	10	6	8	Kcnab3	0.266107	0.430975	0.239654	0.219488	0.246474	0.40635	0.220913	0.268017	7.97105	-0.32536	0.549235	-0.592388	0.553591	0.733639	NOT
ENSMUSG00000018474	8443	1434	1234	1520	1240	1810	1143	1210	1635	Chd3	18.4985	15.0388	17.6587	15.3925	21.6262	15.7607	15.1176	18.5874	1403.65	-0.482795	0.132096	-3.65489	0.000257293	0.00253104	NOT
ENSMUSG00000018476	6954	661	810	600	792	828	622	820	578	Kdm6b	10.3526	11.9852	8.46307	11.9364	12.0114	10.4131	12.4387	7.97793	710.781	-0.112895	0.171578	-0.657983	0.510549	0.701775	NOT
ENSMUSG00000018479	995	0	0	0	0	0	0	0	0	1700125H20Rik	0	0	0	0	0	0	0	0	0	NA	NA	NA	NA	NA	NA
ENSMUSG00000018481	6463	408	455	532	494	374	379	665	457	Appbp2	6.87557	7.2439	8.07401	8.01082	5.83762	6.82701	10.8538	6.78702	461.384	0.117349	0.12574	0.933272	0.350679	0.564065	NOT
ENSMUSG00000018486	4518	14	34	47	41	31	20	40	15	Wnt9b	0.337493	0.774334	1.02038	0.951091	0.692171	0.515358	0.933919	0.318671	29.164	0.731483	0.325389	2.24803	0.0245746	0.0906662	UP
ENSMUSG00000018500	1845	1	2	2	2	0	1	5	1	Adora2b	0.0590319	0.11154	0.106327	0.11361	0	0.0630999	0.28587	0.0520236	1.63241	1.56707	1.25978	1.24392	0.213527	NA	NOT
ENSMUSG00000018501	12811	1953	1745	2083	1719	1806	1749	2036	2027	Ncor1	16.6036	14.0155	15.9484	14.063	14.2211	15.894	16.7645	15.1868	1882.98	-0.278809	0.0956065	-2.91621	0.00354307	0.0202257	NOT
ENSMUSG00000018507	4485	34	75	79	91	70	32	115	37	Trpv2	0.825657	1.72066	1.72773	2.12649	1.57447	0.83064	2.70477	0.791838	63.7989	0.776543	0.269099	2.88571	0.00390528	0.0218418	UP
ENSMUSG00000018509	1811	131	154	179	209	206	130	145	162	Cenpv	7.87836	8.74979	9.69496	12.0952	11.4748	8.35699	8.44588	8.58605	163.24	-0.141726	0.195998	-0.723101	0.469618	0.669345	NOT
ENSMUSG00000018537	3526	80	110	105	97	107	71	115	96	Pcgf2	2.4711	3.21001	2.92091	2.88319	3.06126	2.34424	3.44041	2.61328	96.1811	-0.00540112	0.178143	-0.0303191	0.975813	0.987461	NOT
ENSMUSG00000018541	5053	150	244	200	200	172	132	231	202	Cwc25	3.23314	4.96862	3.88233	4.14825	3.43382	3.04123	4.82234	3.83706	187.737	0.14625	0.156034	0.937291	0.348609	0.561968	NOT
ENSMUSG00000018543	624	0	1	0	3	4	0	2	1	1700001P01Rik	0	0.164896	0	0.503873	0.646656	0	0.338096	0.15382	1.33187	0.0379733	1.50811	0.0251794	0.979912	NA	NOT
ENSMUSG00000018547	5204	248	235	359	314	242	208	338	257	Pip4k2b	5.19036	4.6465	6.76657	6.32378	4.69112	4.6532	6.85133	4.74016	269.944	0.0960037	0.14103	0.680733	0.49604	0.689572	NOT
ENSMUSG00000018548	7214	206	201	245	231	175	159	255	233	Trim37	3.1101	2.86692	3.33121	3.35599	2.44715	2.56594	3.72872	3.10011	209.847	-0.0106984	0.141724	-0.0754874	0.939827	0.971415	NOT
ENSMUSG00000018554	1885	0	1	3	0	0	1	1	0	Ybx2	0	0.0545864	0.156107	0	0	0.0617609	0.0559608	0	0.702527	1.73374	1.94764	0.890176	0.373372	NA	NOT
ENSMUSG00000018559	2182	280	366	347	384	335	283	420	325	Ctdnep1	13.9761	17.2592	15.5986	18.4442	15.4877	15.0993	20.3044	14.2964	337.912	0.0302073	0.122297	0.246999	0.804909	0.900116	NOT
ENSMUSG00000018565	2294	202	247	308	310	218	206	326	294	Elp5	9.59049	11.079	13.1695	14.1629	9.58652	10.4544	14.9906	12.3013	258.689	0.094393	0.139051	0.67884	0.497239	0.690783	NOT
ENSMUSG00000018566	3478	2	6	2	4	1	1	1	1	Slc2a4	0.0626301	0.177508	0.0564043	0.120535	0.0290047	0.0334731	0.0303295	0.0275973	2.20954	1.12496	1.08677	1.03513	0.300606	NA	NOT
ENSMUSG00000018567	1844	1593	1574	1941	1885	1647	1530	1789	1711	Gabarap	94.0888	87.8293	103.247	107.136	90.1012	96.5952	102.34	89.0607	1696.28	-0.134929	0.101122	-1.33432	0.1821	0.373256	NOT
ENSMUSG00000018569	1948	7	22	36	42	7	6	73	14	Cldn7	0.391374	1.16206	1.8127	2.25967	0.362499	0.358581	3.95302	0.68982	23.6525	2.05866	0.440254	4.67607	2.92e-06	5.95e-05	UP
ENSMUSG00000018570	2368	2	4	6	4	4	1	3	3	2810408A11Rik	0.091988	0.17381	0.248531	0.177036	0.170403	0.0491636	0.133639	0.121601	3.24834	0.50235	0.828393	0.606415	0.544239	0.726872	NOT
ENSMUSG00000018572	3273	219	288	291	332	288	205	305	280	Phf23	7.28754	9.05403	8.72084	10.6311	8.87656	7.29177	9.8299	8.21124	271.986	0.0219951	0.138503	0.158806	0.873822	0.938756	NOT
ENSMUSG00000018574	2686	2764	3061	3114	3094	3934	2483	2776	2995	Acadvl	112.077	117.261	113.717	120.725	147.75	107.621	109.021	107.026	3019.42	-0.286733	0.142743	-2.00873	0.0445654	0.14055	NOT
ENSMUSG00000018581	14458	8	2	3	6	5	3	4	7	Dnah11	0.0602649	0.0142337	0.0203528	0.0434938	0.0348867	0.0241567	0.0291841	0.0464715	4.80423	-0.889745	0.707108	-1.25829	0.208288	0.407652	NOT
ENSMUSG00000018583	7064	791	914	1095	1014	869	622	1102	840	G3bp1	12.1958	13.3135	15.2046	15.0443	12.4099	10.251	16.4561	11.4137	888.393	0.122318	0.103531	1.18147	0.237418	0.441934	NOT
ENSMUSG00000018585	541	640	961	898	1005	900	618	832	811	Atox1	128.844	182.777	162.814	194.694	167.82	132.989	162.226	143.887	822.041	0.0500968	0.144386	0.346964	0.728619	0.85371	NOT
ENSMUSG00000018589	3150	0	0	0	0	0	0	0	0	Glra2	0	0	0	0	0	0	0	0	0	NA	NA	NA	NA	NA	NA
ENSMUSG00000018593	3788	1990	2794	3993	3413	2471	1961	4184	2302	Sparc	57.2171	75.8948	103.395	94.4301	65.8053	60.2688	116.514	58.33	2798.46	0.432032	0.115686	3.73451	0.000188079	0.00196191	NOT
ENSMUSG00000018595	2010	4	2	5	1	3	2	3	7	Glra4	0.216744	0.102383	0.243998	0.0521421	0.150565	0.11584	0.157442	0.334271	3.34177	-0.81365	0.845428	-0.962412	0.335843	0.548762	NOT
ENSMUSG00000018599	2716	210	254	235	355	258	202	237	245	Mief2	8.42117	9.62276	8.48691	13.6988	9.5827	8.65858	9.20479	8.65831	247.462	-0.0279231	0.184323	-0.15149	0.879589	0.94194	NOT
ENSMUSG00000018604	6624	429	284	340	242	661	415	227	495	Tbx3	7.05375	4.41157	5.03466	3.82895	10.0665	7.29379	3.61494	7.17269	395.628	-1.14506	0.18136	-6.31373	2.72e-10	2.15e-08	DOWN
ENSMUSG00000018620	3287	0	0	0	0	0	0	0	0	Mmp20	0	0	0	0	0	0	0	0	0	NA	NA	NA	NA	NA	NA
ENSMUSG00000018623	1068	2	9	37	2	8	5	141	7	Mmp7	0.203958	0.867095	3.39815	0.196265	0.755643	0.545034	13.9265	0.629106	22.9673	2.75438	1.13214	2.4329	0.0149783	0.0626367	UP
ENSMUSG00000018634	2460	0	0	0	0	0	0	0	0	Crhr1	0	0	0	0	0	0	0	0	0	NA	NA	NA	NA	NA	NA
ENSMUSG00000018648	1945	13	17	13	12	3	9	30	14	Dusp14	0.727959	0.899342	0.655595	0.646615	0.155596	0.538701	1.62703	0.690884	13.3398	0.588559	0.506157	1.1628	0.244911	0.450627	NOT
ENSMUSG00000018651	2974	65	68	60	49	60	43	93	62	Tada2a	2.38043	2.35268	1.97889	1.72679	2.03521	1.68327	3.29866	2.001	61.51	-0.0541735	0.238485	-0.227157	0.820302	0.908745	NOT
ENSMUSG00000018654	5777	85	145	142	140	101	66	188	81	Ikzf1	1.60251	2.58262	2.411	2.53986	1.76367	1.33005	3.43282	1.3458	114.395	0.601676	0.179411	3.35362	0.000797614	0.00626241	UP
ENSMUSG00000018656	3692	0	0	0	0	0	0	1	0	Tcaf3	0	0	0	0	0	0	0.0285715	0	0.104124	0.43757	3.53381	0.123824	0.901455	NA	NOT
ENSMUSG00000018659	2925	1163	815	1235	1156	1237	1039	733	1532	Pnpo	43.3049	28.67	41.4145	41.4206	42.6621	41.3538	26.4346	50.2724	1119.99	-0.604068	0.180575	-3.34526	0.000822068	0.00640884	DOWN
ENSMUSG00000018661	4987	201	178	255	148	208	200	203	249	Cog1	4.38975	3.67262	5.01548	3.11033	4.20748	4.66891	4.2939	4.79244	204.835	-0.417218	0.164557	-2.5354	0.011232	0.0501559	NOT
ENSMUSG00000018666	4273	248	233	307	270	241	200	346	273	Cbx1	6.32123	5.61072	7.04721	6.6224	5.68961	5.44907	8.54158	6.13235	260.342	-0.0207771	0.133877	-0.155195	0.876668	0.940172	NOT
ENSMUSG00000018669	3812	393	460	508	493	555	419	441	616	Cdk5rap3	11.2285	12.4165	13.0714	13.5543	14.6872	12.7964	12.2034	15.5105	483.284	-0.326896	0.14042	-2.32798	0.0199129	0.0778642	NOT
ENSMUSG00000018672	2208	200	165	197	144	199	186	166	282	Copz2	9.86538	7.68919	8.75142	6.83514	9.09185	9.80707	7.93057	12.2588	193.246	-0.642765	0.156457	-4.10824	3.99e-05	0.000540243	DOWN
ENSMUSG00000018677	2756	4360	5804	6048	6562	5238	4311	5353	5594	Slc25a39	172.302	216.692	215.25	249.541	191.727	182.106	204.886	194.823	5342.71	0.0155762	0.119623	0.13021	0.8964	0.95069	NOT
ENSMUSG00000018678	3414	89	128	119	103	91	95	143	98	Sp2	2.83929	3.85782	3.41897	3.16197	2.68891	3.23955	4.41843	2.75524	106.59	0.115274	0.175347	0.657404	0.510921	0.70215	NOT
ENSMUSG00000018697	2869	104	182	154	146	142	99	154	149	Aatf	3.94808	6.52734	5.26504	5.33343	4.99293	4.01726	5.6622	4.98486	138.834	0.098011	0.175154	0.559571	0.575772	0.751667	NOT
ENSMUSG00000018698	4072	0	0	0	1	2	1	0	0	Lhx1	0	0	0	0.0257381	0.0495473	0.0285902	0	0	0.53428	-1.60341	2.32707	-0.689025	0.490808	NA	NOT
ENSMUSG00000018707	15658	2148	1893	2312	1648	2296	1724	2163	2383	Dync1h1	14.941	12.4397	14.4832	11.0308	14.7922	12.8182	14.5719	14.6078	2062.62	-0.374552	0.111855	-3.34854	0.000812389	0.00635178	NOT
ENSMUSG00000018727	2246	83	61	62	71	72	82	47	112	Cpsf4l	4.02487	2.79457	2.70766	3.31309	3.23386	4.2504	2.20741	4.78636	74.927	-0.80464	0.226514	-3.55227	0.000381918	0.00347249	DOWN
ENSMUSG00000018733	3536	133	189	194	160	150	115	180	201	Pex12	4.09659	5.49978	5.38147	4.74233	4.27934	3.78626	5.36977	5.45608	162.369	0.0038186	0.16462	0.0231964	0.981494	0.990732	NOT
[truncated: 53,700 more rows]
